# Supplementary material for: Metal-free heteroarene C(sp2)–H amination with unprotected (hetero)arylamines
Source: Royal Society of Chemistry journal article supplement (doi:10.1039/d3qo00338h), 2023-01-01
Supplement: d3qo00338h1.pdf [file d3qo00338h1.pdf]

## Supplementary Information

### Metal-Free Heteroarene C(sp<sup>2</sup>)-H Aminations with Unprotected (Hetero)arylamines

Tao Wen,<sup>1</sup> Zhen Zhang,<sup>1,\*</sup> Lihua Ye,<sup>1</sup> Chihong Zhang,<sup>1</sup> Bo Jin,<sup>1</sup> Wenkun Wang,<sup>1</sup> Zhong-Ning Chen,<sup>2</sup> Hu Cai<sup>1,\*</sup>

<sup>1</sup> School of Chemistry and Chemical Engineering, Nanchang University, Jiangxi Province, Nanchang 330031, People's Republic of China

<sup>2</sup> Fujian Institute of Research on the Structure, Chinese Academy of Science, Fuzhou, Fujian 350002, People's Republic of China

\*Correspondence: [zhangzhen@ncu.edu.cn](mailto:zhangzhen@ncu.edu.cn)

\*Correspondence: [caihu@ncu.edu.cn](mailto:caihu@ncu.edu.cn)

#### Contents:

|                                                                                |      |
|--------------------------------------------------------------------------------|------|
| 1. General Information.....                                                    | S2   |
| 2. Preparation of Starting Materials.....                                      | S3   |
| 3. Detailed Reaction Optimization.....                                         | S28  |
| 4. Intramolecular C(sp <sup>2</sup> )-H Amination of Azines.....               | S34  |
| 5. Synthesis of Important Molecules and Scale-up Experiment.....               | S60  |
| 6. Mechanistic Studies.....                                                    | S66  |
| 7. X-Ray Ellipsoid Plots of <b>2a-31</b> , <b>2a-34</b> and <b>2b-21</b> ..... | S69  |
| 8. NMR Spectra of Substrates and Products.....                                 | S72  |
| 9. References.....                                                             | S335 |

## 1. General Information

All reactions under standard conditions were carried out under nitrogen and monitored by thin-layer chromatography (TLC) on gel F254 plates. Hexane and ethyl acetate were used as eluents. All solvents were purified and dried by standard techniques and distilled prior to use.  $^1\text{H}$  NMR,  $^{13}\text{C}$  NMR and  $^{19}\text{F}$  NMR spectra were recorded in  $\text{CDCl}_3$  or  $\text{DMSO}-d_6$  solution on *Agilent ProPulse* AM-400 MHz instruments and the spectral data were reported in ppm relative to tetramethylsilane (0.00 ppm) or residual undeuterated solvent  $\text{CHCl}_3$  (7.26 ppm) and DMSO (2.50 ppm) as internal standard for  $^1\text{H}$  NMR and deuterated solvent  $\text{CDCl}_3$  (77.0 ppm) and  $\text{DMSO}-d_6$  (39.5 ppm) as internal standard for  $^{13}\text{C}$  NMR. All coupling constants are apparent J values measured at the indicated field strengths in Hertz (s = singlet, d = doublet, t = triplet, q = quartet, m = multiplet, hept = heptet, dd = doublet of doublets, dt = doublet of triplets, td = triplet of doublets, ddd = doublet of doublet of doublets, tt = triplet of triplet, ttt = triplet of triplet of triplets). High-resolution mass spectral analysis (HRMS) data were measured on an *Agilent* 7890-5975C spectrometer by means of the ESI technique.

Known compounds:

**1a-1, 1a-2, 1a-3, 1a-4, 1a-5, 1a-9, 1a-15, 1a-17, 1a-19, 1a-28, 1a-29;**

**1b-1, 1b-2, 1b-5, 1b-8, 1b-15, 1b-19, 1b-21, 1b-22, 1b-23;**

**2a-1, 2a-2, 2a-3, 2a-4, 2a-5, 2a-7, 2a-8, 2a-9, 2a-10, 2a-14, 2a-15, 2a-16, 2a-17, 2a-18, 2a-19, 2a-20, 2a-28, 2a-29, 2a-30, 2a-31;**

**2b-1, 2b-2, 2b-4, 2b-5, 2b-6, 2b-10, 2b-11, 2b-12, 2b-13, 2b-16, 2b-18, 2b-19, 2b-21, 2b-22, 2b-23, 2b-25.**

## 2. Preparation of Starting Materials

### 2.1 General procedure 1: for the synthesis of 2-(pyridin-3-yl)aniline derivatives **1a-1-1a-10**, **1a-12-1a-20**, **1a-22-1a-34**, **1b-1-1b-25**

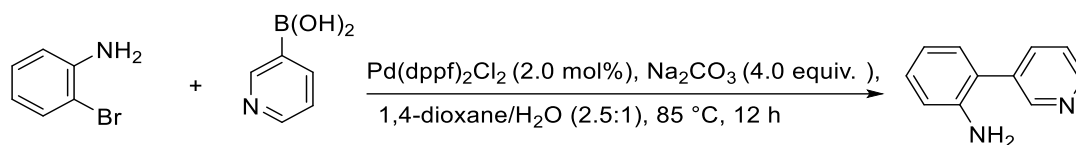

A clean, oven-dried Schlenk tube with previously placed magnetic stir-bar was charged with 2-bromoaniline (860.0 mg, 1.0 equiv.), pyridin-3-ylboronic acid (738.0 mg, 1.2 equiv.), Pd(dppf)<sub>2</sub>Cl<sub>2</sub> (76.2 mg, 2.0 mmol%) and Na<sub>2</sub>CO<sub>3</sub> (2.12 g, 4.0 equiv.). The reaction was evacuated and back filled with nitrogen and this sequence was repeated for three additional times. Under the positive flow of nitrogen, a 2.5/1 mixture of 1,4-dioxane (25 mL) and water (10 mL) was added to the reaction mixture. The reaction mixture was vigorously stirred at 85 °C for 12 h. Next, the reaction was allowed to cool at room temperature and the reaction mixture was extracted with ethyl acetate (3×50 mL) and brine solution (3×25 mL). The organic layer was collected and dried over anhydrous Na<sub>2</sub>SO<sub>4</sub>. The solvent was evaporated under reduced pressure and chromatographic separation with silica gel to give the desired **1a-1**. Substrates **1a-1-1a-10**, **1a-12-1a-20**, **1a-22-1a-34**, **1b-1-1b-25** were prepared by this method. <sup>[1]</sup>

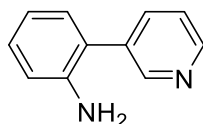

### 2-(pyridin-3-yl)aniline (**1a-1**)<sup>[2]</sup>

Prepared according to general procedure 1 to afford **1a-1** (807 mg, 95% yield) as a yellow oil. <sup>1</sup>H NMR (400 MHz, CDCl<sub>3</sub>): δ 8.71 (s, 1H), 8.59 (d, *J* = 3.8 Hz, 1H), 7.81 (d, *J* = 7.8 Hz, 1H), 7.37 (dd, *J* = 7.8, 4.9 Hz, 1H), 7.20 (t, *J* = 8.2 Hz, 1H), 7.10 (d, *J* = 7.5 Hz, 1H), 6.85 (t, *J* = 7.5 Hz, 1H), 6.79 (d, *J* = 8.0 Hz, 1H), 3.35 (s, 2H). <sup>13</sup>C-NMR (100 MHz, CDCl<sub>3</sub>): δ 149.8, 148.2, 143.8, 136.6, 135.6, 130.6, 129.4, 123.8, 123.7, 118.9, 115.9. HRMS (*m/z*): calcd for C<sub>11</sub>H<sub>10</sub>N<sub>2</sub> [M+H]<sup>+</sup>: 171.0917, Found: 171.0922.

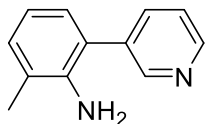

### 2-methyl-6-(pyridin-3-yl)aniline (**1a-2**)<sup>[3]</sup>

Prepared according to general procedure 1 to afford **1a-2** (298 mg, 81% yield) as a yellow oil. <sup>1</sup>H-NMR (400 MHz, CDCl<sub>3</sub>): δ 8.51 (s, 1H), 8.36 (d, *J* = 4.9 Hz, 1H), 7.58 (d, *J* = 7.9 Hz, 1H), 7.14 (dd, *J* = 7.5, 4.6 Hz, 1H), 6.91 (d, *J* = 7.3 Hz, 1H), 6.78 (d, *J* = 7.5 Hz, 1H), 6.62-6.56 (m, 1H), 3.56 (s, 2H), 2.03 (s, 3H). <sup>13</sup>C-NMR (100 MHz, CDCl<sub>3</sub>): δ 150.0, 148.2, 142.0, 136.7, 135.7, 130.5, 128.4, 123.6, 123.4, 122.7, 118.2, 17.8. HRMS (*m/z*): calcd for C<sub>12</sub>H<sub>12</sub>N<sub>2</sub> [M+H]<sup>+</sup>: 185.1073, Found: 185.1072.

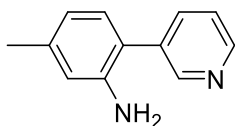

### 3-methyl-6-(pyridin-3-yl)aniline (**1a-3**)<sup>[4]</sup>

Prepared according to general procedure 1 to afford **1a-3** (290 mg, 79% yield) as a brown oil. <sup>1</sup>H-NMR (400 MHz, CDCl<sub>3</sub>): δ 8.70 (s, 1H), 8.56 (s, 1H), 7.77 (d, *J* = 7.8 Hz, 1H), 7.33 (t, *J* = 6.3 Hz, 1H), 6.98 (d, *J* = 7.6 Hz, 1H), 6.66 (d, *J* = 7.7 Hz, 1H), 6.59 (s, 1H), 3.62 (s, 2H), 2.29 (s, 3H). <sup>13</sup>C-NMR (100 MHz, CDCl<sub>3</sub>): δ 150.0, 148.1, 143.6, 139.4, 136.5, 135.4, 130.4, 123.6, 121.0, 119.8, 116.5, 21.2. HRMS (*m/z*): calcd for C<sub>12</sub>H<sub>12</sub>N<sub>2</sub> [M+H]<sup>+</sup>: 185.1073, Found: 185.1085.

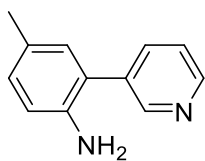

### 4-methyl-2-(pyridin-3-yl)aniline (**1a-4**)<sup>[2]</sup>

Prepared according to general procedure 1 to afford **1a-4** (294 mg, 80% yield) as a brown oil. <sup>1</sup>H-NMR (400 MHz, CDCl<sub>3</sub>): δ 8.53 (s, 1H), 8.38 (s, 1H), 7.65-7.58 (m, 1H), 7.16 (dd, *J* = 8.2, 4.0 Hz, 1H), 6.86-6.79 (m, 1H), 6.75 (s, 1H), 6.53 (dd, *J* = 8.0, 2.8 Hz, 1H), 3.58 (s, 2H), 2.12 (s, 3H). <sup>13</sup>C-NMR (100 MHz, CDCl<sub>3</sub>): δ 149.9, 148.1, 141.4,

136.6, 135.5, 130.9, 129.9, 128.0, 123.6, 123.5, 116.1, 20.4. HRMS (m/z): calcd for  $C_{12}H_{12}N_2$   $[M+H]^+$ : 185.1073, Found: 185.1082.

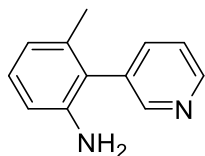

### 3-methyl-2-(pyridin-3-yl)aniline (**1a-5**)

Prepared according to general procedure 1 to afford **1a-5** (258 mg, 70% yield) as a yellow oil.  $^1H$ -NMR (400 MHz,  $CDCl_3$ ):  $\delta$  8.58 (dd,  $J = 4.8, 1.7$  Hz, 1H), 8.49 (d,  $J = 2.1$  Hz, 1H), 7.59 (dt,  $J = 7.7, 2.0$  Hz, 1H), 7.38 (dd,  $J = 7.7, 4.9$  Hz, 1H), 7.06 (t,  $J = 7.8$  Hz, 1H), 6.69 (d,  $J = 7.5$  Hz, 1H), 6.61 (d,  $J = 8.0$  Hz, 1H), 3.38 (s, 2H), 1.97 (s, 3H).  $^{13}C$ -NMR (100 MHz,  $CDCl_3$ ):  $\delta$  150.8, 148.5, 144.3, 137.9, 137.1, 134.1, 128.8, 124.0, 123.5, 120.1, 113.0, 20.7. HRMS (m/z): calcd for  $C_{12}H_{12}N_2$   $[M+H]^+$ : 185.1073, Found: 185.1082.

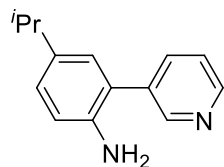

### 5-isopropyl-2-(pyridin-3-yl)aniline (**1a-6**)

Prepared according to general procedure 1 to afford **1a-6** (256 mg, 61% yield) as a brown oil.  $^1H$ -NMR (400 MHz,  $CDCl_3$ ):  $\delta$  8.71 (d,  $J = 2.2$  Hz, 1H), 8.55 (d,  $J = 4.6$  Hz, 1H), 7.81 (dt,  $J = 7.5, 1.6$  Hz, 1H), 7.33 (dd,  $J = 7.8, 4.8$  Hz, 1H), 7.06 (dd,  $J = 8.2, 2.1$  Hz, 1H), 6.96 (d,  $J = 2.1$  Hz, 1H), 6.73 (d,  $J = 0.6$  Hz, 1H), 3.67 (s, 2H), 2.84 (hept,  $J = 6.9$  Hz, 1H), 1.23 (d,  $J = 6.9$  Hz, 6H).  $^{13}C$ -NMR (100 MHz,  $CDCl_3$ ):  $\delta$  150.0, 148.2, 141.7, 139.4, 136.6, 135.6, 128.4, 127.3, 123.6, 123.5, 116.1, 33.2, 24.3. HRMS (m/z): calcd for  $C_{14}H_{16}N_2$   $[M+H]^+$ : 213.1386, Found: 213.1400.

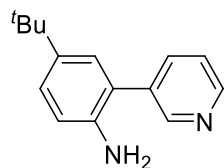

#### 4-(*tert*-butyl)-2-(pyridin-3-yl)aniline (**1a-7**)

Prepared according to general procedure 1 to afford **1a-7** (360 mg, 80% yield) as a red oil. <sup>1</sup>H-NMR (400 MHz, CDCl<sub>3</sub>): δ 8.73 (s, 1H), 8.56 (d, *J* = 4.3 Hz, 1H), 7.82 (d, *J* = 7.9 Hz, 1H), 7.37-7.31 (m, 1H), 7.23 (dd, *J* = 8.3, 1.8 Hz, 1H), 7.12 (d, *J* = 2.3 Hz, 1H), 6.73 (d, *J* = 8.0 Hz, 1H), 3.68 (s, 2H), 1.31 (s, 9H). <sup>13</sup>C-NMR (100 MHz, CDCl<sub>3</sub>): δ 150.1, 148.2, 141.7, 141.4, 136.6, 135.9, 127.3, 126.3, 123.5, 123.3, 115.8, 34.0, 31.6. HRMS (*m/z*): calcd for C<sub>15</sub>H<sub>18</sub>N<sub>2</sub> [M+H]<sup>+</sup>: 227.1543, Found: 227.1552.

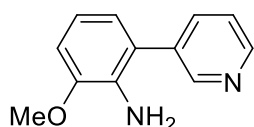

#### 2-methoxy-6-(pyridin-3-yl)aniline (**1a-8**)

Prepared according to general procedure 1 to afford **1a-8** (240 mg, 60% yield) as a yellow oil. <sup>1</sup>H-NMR (400 MHz, CDCl<sub>3</sub>): δ 8.69 (s, 1H), 8.52 (dd, *J* = 4.9, 1.5 Hz, 1H), 7.78 (dt, *J* = 7.8, 1.9 Hz, 1H), 7.30 (dd, *J* = 7.8, 4.9 Hz, 1H), 6.82-6.69 (m, 3H), 3.84 (s, 3H), 3.77 (s, 2H). <sup>13</sup>C-NMR (100 MHz, CDCl<sub>3</sub>): δ 150.0, 148.2, 147.3, 136.4, 135.2, 133.9, 123.5, 123.5, 122.4, 117.9, 110.0, 55.7. HRMS (*m/z*): calcd for C<sub>12</sub>H<sub>12</sub>N<sub>2</sub>O [M+H]<sup>+</sup>: 201.1022, Found: 201.1032.

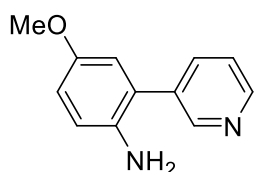

#### 4-methoxy-2-(pyridin-3-yl)aniline (**1a-9**)<sup>[2]</sup>

Prepared according to general procedure 1 to afford **1a-9** (256 mg, 64% yield) as a yellowish-brown solid. <sup>1</sup>H-NMR (400 MHz, CDCl<sub>3</sub>): δ 8.71 (s, 1H), 8.58 (d, *J* = 5.1 Hz, 1H), 7.81 (d, *J* = 7.8 Hz, 1H), 7.37 (dd, *J* = 7.9, 4.8 Hz, 1H), 6.80 (dd, *J* = 8.7, 2.9 Hz, 1H), 6.77-6.64 (m, 2H), 3.76 (s, 3H), 3.21 (s, 2H). <sup>13</sup>C-NMR (100 MHz, CDCl<sub>3</sub>): δ 152.9, 149.9, 148.4, 137.4, 136.6, 135.3, 124.8, 123.5, 117.3, 115.7, 115.3, 55.8. HRMS (*m/z*): calcd for C<sub>12</sub>H<sub>12</sub>N<sub>2</sub>O [M+H]<sup>+</sup>: 201.1022, Found: 201.1030.

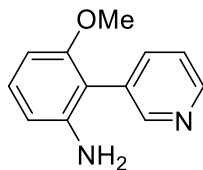

### 3-methoxy-2-(pyridin-3-yl)aniline (**1a-10**)

Prepared according to general procedure 1 to afford **1a-10** (260 mg, 56% yield) as a brown solid, (m.p. 118-119 °C). <sup>1</sup>H-NMR (400 MHz, CDCl<sub>3</sub>): δ 8.59-8.52 (m, 2H), 7.67 (dt, *J* = 7.8, 1.9 Hz, 1H), 7.35 (dd, *J* = 7.8, 4.8 Hz, 1H), 7.12 (t, *J* = 8.2 Hz, 1H), 6.40 (t, *J* = 8.5 Hz, 2H), 3.66 (s, 3H), 3.51 (s, 2H). <sup>13</sup>C-NMR (100 MHz, CDCl<sub>3</sub>): δ 157.7, 151.6, 148.2, 145.4, 138.5, 131.1, 129.6, 123.6, 112.3, 108.6, 100.9, 55.5. HRMS (m/z): calcd for C<sub>12</sub>H<sub>12</sub>N<sub>2</sub>O [M+H]<sup>+</sup>: 201.1022, Found: 201.1018.

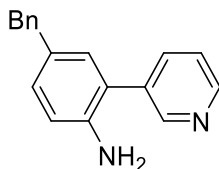

### 4-benzyl-2-(pyridin-3-yl)aniline (**1a-12**)

Prepared according to general procedure 1 to afford **1a-12** (411 mg, 79% yield) as a yellow oil. <sup>1</sup>H-NMR (400 MHz, CDCl<sub>3</sub>): δ 8.47 (d, *J* = 2.2 Hz, 1H), 8.29 (d, *J* = 3.1 Hz, 1H), 7.50 (dt, *J* = 7.8, 2.0 Hz, 1H), 7.07-6.92 (m, 6H), 6.78 (d, *J* = 8.1 Hz, 1H), 6.73 (s, 1H), 6.44 (d, *J* = 8.1 Hz, 1H), 3.67 (s, 2H), 3.50 (s, 2H). <sup>13</sup>C-NMR (100 MHz, CDCl<sub>3</sub>): δ 150.0, 148.2, 142.3, 142.3, 141.7, 136.6, 135.5, 131.5, 130.9, 129.9, 128.9, 128.6, 126.1, 123.8, 123.6, 116.3, 41.1. HRMS (m/z): calcd for C<sub>18</sub>H<sub>16</sub>N<sub>2</sub> [M+H]<sup>+</sup>: 261.1386, Found: 261.1393.

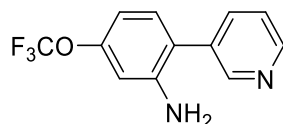

### 2-(pyridin-3-yl)-5-(trifluoromethoxy)aniline (**1a-13**)

Prepared according to general procedure 1 to afford **1a-13** (366 mg, 72% yield) as a yellow solid, (m.p. 56-57 °C). <sup>1</sup>H-NMR (400 MHz, CDCl<sub>3</sub>): δ 8.49 (s, 1H), 8.40 (d, *J* = 4.3 Hz, 1H), 7.61 (d, *J* = 7.9 Hz, 1H), 7.20 (dd, *J* = 7.9, 4.8 Hz, 1H), 6.91 (d, *J* = 8.2 Hz, 1H), 6.54-6.47 (m, 2H), 3.97 (s, 2H). <sup>13</sup>C-NMR (100 MHz, CDCl<sub>3</sub>): δ 150.0 (q, *J* = 1.8 MHz), 149.7, 148.5, 145.5, 136.5, 134.2, 131.5, 123.6, 121.9, 121.7, 110.3, 107.6. HRMS (m/z): calcd for C<sub>12</sub>H<sub>9</sub>F<sub>3</sub>N<sub>2</sub>O [M+H]<sup>+</sup>: 255.0744, Found: 255.0748.

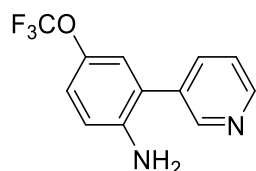

### 2-(pyridin-3-yl)-4-(trifluoromethoxy)aniline (**1a-14**)

Prepared according to general procedure 1 to afford **1a-14** (386 mg, 76% yield) as a brown liquid. <sup>1</sup>H-NMR (400 MHz, CDCl<sub>3</sub>): δ 8.52 (s, 1H), 8.43 (d, *J* = 4.6 Hz, 1H), 7.64 (dt, *J* = 7.8, 2.0 Hz, 1H), 7.24 (dd, *J* = 7.8, 4.8 Hz, 1H), 6.93 (d, *J* = 8.3 Hz, 1H), 6.54 (d, *J* = 8.4 Hz, 1H), 6.51 (s, 1H), 3.89 (s, 2H). <sup>13</sup>C-NMR (100 MHz, CDCl<sub>3</sub>): δ 150.0 (q, *J* = 1.9 MHz), 149.7, 148.5, 145.5, 136.6, 134.2, 131.6, 123.7, 121.9, 121.7, 119.1, 110.4, 107.6. HRMS (m/z): calcd for C<sub>12</sub>H<sub>9</sub>F<sub>3</sub>N<sub>2</sub>O [M+H]<sup>+</sup>: 255.0744, Found: 255.0750.

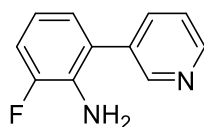

### 2-fluoro-6-(pyridin-3-yl)aniline (**1a-15**)<sup>[5]</sup>

Prepared according to general procedure 1 to afford **1a-15** (229 mg, 61% yield) as a gray solid. <sup>1</sup>H-NMR (400 MHz, CDCl<sub>3</sub>): δ 8.71 (s, 1H), 8.61 (d, *J* = 4.7 Hz, 1H), 7.81 (d, *J* = 7.8 Hz, 1H), 7.39 (t, *J* = 6.3 Hz, 1H), 7.03 (t, *J* = 9.5 Hz, 1H), 6.90 (d, *J* = 7.7 Hz, 1H), 6.76 (q, *J* = 7.4 Hz, 1H), 3.74 (s, 2H). <sup>13</sup>C-NMR (100 MHz, CDCl<sub>3</sub>): δ 152.9, 150.6, 149.8, 148.7, 136.4, 134.2, 132.5 (d, *J* = 13.0 Hz), 125.6 (d, *J* = 3.0 Hz), 123.6, 118.0 (d, *J* = 8.0 Hz), 114.8 (d, *J* = 19.0 Hz). HRMS (m/z): calcd for C<sub>11</sub>H<sub>9</sub>FN<sub>2</sub> [M+H]<sup>+</sup>: 189.0823, Found: 189.0827.



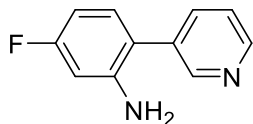

### 5-fluoro-2-(pyridin-3-yl)aniline (**1a-16**)

Prepared according to general procedure 1 to afford **1a-16** (331 mg, 88% yield) as a pale-yellow solid, (m.p. 73-74 °C). <sup>1</sup>H-NMR (400 MHz, CDCl<sub>3</sub>): δ 8.68-8.55 (m, 2H), 7.75 (d, *J* = 7.8 Hz, 1H), 7.36 (dd, *J* = 7.8, 4.8 Hz, 1H), 7.03 (t, *J* = 7.4 Hz, 1H), 6.58-6.43 (m, 2H), 3.82 (s, 2H). <sup>13</sup>C-NMR (100 MHz, CDCl<sub>3</sub>): δ 164.8, 162.4, 150.1, 148.5, 145.5 (d, *J* = 11.0 Hz), 136.6, 134.5, 131.8 (d, *J* = 10.0 Hz), 123.6, 105.5 (d, *J* = 22.0 Hz), 102.3 (d, *J* = 24.0 Hz). HRMS (m/z): calcd for C<sub>11</sub>H<sub>9</sub>FN<sub>2</sub> [M+H]<sup>+</sup>: 189.0823, Found: 189.0829.

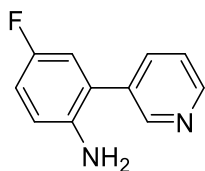

### 4-fluoro-2-(pyridin-3-yl)aniline (**1a-17**)<sup>[2]</sup>

Prepared according to general procedure 1 to afford **1a-17** (282 mg, 75% yield) as a light gray oil. <sup>1</sup>H-NMR (400 MHz, CDCl<sub>3</sub>): δ 8.70 (s, 1H), 8.61 (d, *J* = 4.8 Hz, 1H), 7.79 (d, *J* = 7.8 Hz, 1H), 7.38 (dd, *J* = 7.8, 4.9 Hz, 1H), 6.91 (td, *J* = 8.5, 2.9 Hz, 1H), 6.84 (dd, *J* = 9.0, 2.9 Hz, 1H), 6.72 (dd, *J* = 8.8, 4.8 Hz, 1H), 3.40 (s, 2H). <sup>13</sup>C-NMR (100 MHz, CDCl<sub>3</sub>): δ 157.5, 155.1, 149.8, 148.8, 139.9, 136.4, 134.4, 123.6, 116.80, 116.7 (d, *J* = 30.0 Hz), 115.8 (d, *J* = 22.0 Hz). HRMS (m/z): calcd for C<sub>11</sub>H<sub>9</sub>FN<sub>2</sub> [M+H]<sup>+</sup>: 189.0823, Found: 189.0827.

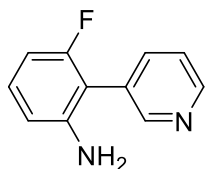

### 3-fluoro-2-(pyridin-3-yl)aniline (**1a-18**)

Prepared according to general procedure 1 to afford **1a-18** (226 mg, 60% yield) as a black solid, (m.p. 78-79 °C). <sup>1</sup>H-NMR (400 MHz, CDCl<sub>3</sub>): δ 8.71-8.54 (m, 2H), 7.74 (d, *J* = 7.8 Hz, 1H), 7.40 (t, *J* = 6.3 Hz, 1H), 7.12 (q, *J* = 7.6 Hz, 1H), 6.56 (d, *J* = 6.8 Hz, 2H), 3.75 (s, 2H). <sup>13</sup>C-NMR (100 MHz, CDCl<sub>3</sub>): δ 161.9, 159.5, 151.0 (d, *J* = 1.3 Hz), 149.02, 145.8 (d, *J* = 5.6 Hz), 138.0 (d, *J* = 1.3 Hz), 123.0 (d, *J* = 10.5 Hz), 128.6, 123.7, 111.0 (d, *J* = 2.8 Hz), 105.1 (d, *J* = 22.8 Hz). HRMS (m/z): calcd for C<sub>11</sub>H<sub>9</sub>FN<sub>2</sub> [M+H]<sup>+</sup>: 189.0823, Found: 189.0829.

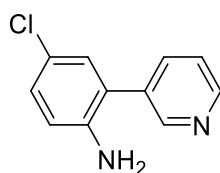

#### 4-chloro-2-(pyridin-3-yl)aniline (**1a-19**)<sup>[2]</sup>

Prepared according to general procedure 1 to afford **1a-19** (258 mg, 63% yield) as a brown solid. <sup>1</sup>H-NMR (400 MHz, CDCl<sub>3</sub>): δ 8.68 (s, 1H), 8.61 (dd, *J* = 4.9, 1.6 Hz, 1H), 7.77 (dt, *J* = 7.9, 2.0 Hz, 1H), 7.38 (dd, *J* = 7.8, 4.9 Hz, 1H), 7.14 (dd, *J* = 8.6, 2.4 Hz, 1H), 7.07 (d, *J* = 2.4 Hz, 1H), 6.71 (d, *J* = 8.5 Hz, 1H), 3.72 (s, 2H). <sup>13</sup>C-NMR (100 MHz, CDCl<sub>3</sub>): δ 149.8, 148.9, 142.4, 136.4, 134.1, 130.0, 129.1, 125.0, 123.7, 123.4, 117.0. HRMS (m/z): calcd for C<sub>11</sub>H<sub>9</sub>ClN<sub>2</sub> [M+H]<sup>+</sup>: 205.0527, Found: 205.0523.

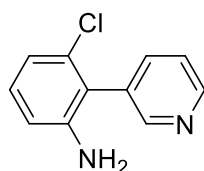

#### 3-chloro-2-(pyridin-3-yl)aniline (**1a-20**)<sup>[2]</sup>

Prepared according to general procedure 1 to afford **1a-20** (247 mg, 60% yield) as a brown solid, (m.p. 110-112 °C). <sup>1</sup>H-NMR (400 MHz, CDCl<sub>3</sub>): δ 8.65 (s, 1H), 8.58 (s, 1H), 7.65 (d, *J* = 7.8 Hz, 1H), 7.41 (dd, *J* = 7.8, 4.7 Hz, 1H), 7.08 (t, *J* = 8.0 Hz, 1H), 6.86 (d, *J* = 7.9 Hz, 1H), 6.65 (d, *J* = 8.1 Hz, 1H), 3.52 (s, 2H). <sup>13</sup>C-NMR (100 MHz, CDCl<sub>3</sub>): δ 150.9, 149.0, 145.9, 138.1, 134.2, 132.3, 129.8, 124.0, 122.1, 119.1, 113.7. HRMS (m/z): calcd for C<sub>11</sub>H<sub>9</sub>ClN<sub>2</sub> [M+H]<sup>+</sup>: 205.0527, Found: 205.0535.

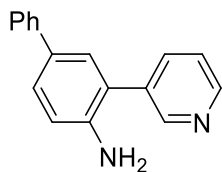

### 3-(pyridin-3-yl)-[1,1'-biphenyl]-4-amine (1a-22)

Prepared according to general procedure 1 to afford **1a-22** (247 mg, 70% yield) as a red oil.  $^1\text{H-NMR}$  (400 MHz,  $\text{CDCl}_3$ ):  $\delta$  8.63 (s, 1H), 8.50 (s, 1H), 7.71 (d,  $J = 7.8$  Hz, 1H), 7.28 (dd,  $J = 7.9, 4.7$  Hz, 1H), 7.20 (t,  $J = 7.9$  Hz, 2H), 6.92 (dd,  $J = 22.6, 7.7$  Hz, 3H), 6.84 (dd,  $J = 8.6, 2.7$  Hz, 1H), 6.77 (d,  $J = 2.7$  Hz, 1H), 6.68 (d,  $J = 8.6$  Hz, 1H), 3.45 (s, 2H).  $^{13}\text{C-NMR}$  (100 MHz,  $\text{CDCl}_3$ ):  $\delta$  158.5, 149.8, 148.9, 148.6, 140.0, 136.5, 134.7, 129.6, 124.8, 123.6, 122.4, 121.9, 121.1, 117.4, 117.1. HRMS ( $m/z$ ): calcd for  $\text{C}_{17}\text{H}_{14}\text{N}_2$   $[\text{M}+\text{H}]^+$ : 247.1230, Found: 247.1236.

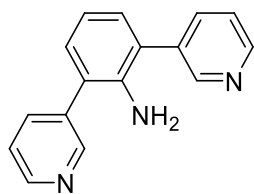

### 2,6-di(pyridin-3-yl)aniline (1a-23)

Prepared according to general procedure 1 to afford **1a-23** (198 mg, 40% yield) as a yellow solid, (m.p. 184-185 °C).  $^1\text{H-NMR}$  (400 MHz,  $\text{CDCl}_3$ ):  $\delta$  8.74 (s, 2H), 8.60 (s, 2H), 7.84 (d,  $J = 7.8$  Hz, 2H), 7.39 (t,  $J = 4.3$  Hz, 2H), 7.13 (d,  $J = 6.3$  Hz, 2H), 6.92 (t,  $J = 6.6$  Hz, 1H), 3.71 (s, 2H).  $^{13}\text{C-NMR}$  (100 MHz,  $\text{CDCl}_3$ ):  $\delta$  150.1, 148.6, 141.2, 136.8, 135.1, 130.7, 124.4, 123.6, 118.7. HRMS ( $m/z$ ): calcd for  $\text{C}_{16}\text{H}_{13}\text{N}_3$   $[\text{M}+\text{H}]^+$ : 248.1182, Found: 248.1197.

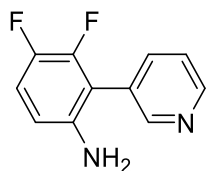

### 3,4-difluoro-2-(pyridin-3-yl)aniline (1a-24)

Prepared according to general procedure 1 to afford **1a-24** (313 mg, 76% yield) as a gray solid, (m.p. 92-94 °C). <sup>1</sup>H-NMR (400 MHz, CDCl<sub>3</sub>): δ 8.63 (s, 2H), 7.73 (d, *J* = 7.9 Hz, 1H), 7.41 (dd, *J* = 7.9, 4.9 Hz, 1H), 6.99 (q, *J* = 9.1 Hz, 1H), 6.49-6.41 (m, 1H), 3.36 (s, 2H). <sup>13</sup>C-NMR (100 MHz, CDCl<sub>3</sub>): δ 150.8 (d, *J* = 1.5 Hz), 149.4, 147.0 (d, *J* = 13.6 Hz), 145.0 (d, *J* = 13.6 Hz), 142.5 (d, *J* = 13.6 Hz), 137.9, 127.8, 123.8, 117.1 (dd, *J* = 18.0, 2.0 Hz), 113.3 (d, *J* = 15.6 Hz), 110.0 (q, *J* = 3.7 Hz). HRMS (m/z): calcd for C<sub>11</sub>H<sub>8</sub>F<sub>2</sub>N<sub>2</sub> [M+H]<sup>+</sup>: 207.0728, Found: 207.0735.

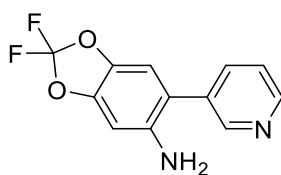

### 2,2-difluoro-6-(pyridin-3-yl)benzo[d][1,3]dioxol-5-amine (**1a-25**)

Prepared according to general procedure 1 to afford **1a-25** (360 mg, 72% yield) as a brown solid, (m.p. 125-127 °C). <sup>1</sup>H-NMR (400 MHz, CDCl<sub>3</sub>): δ 8.66 (d, *J* = 15.4 Hz, 2H), 7.74 (d, *J* = 7.6 Hz, 1H), 7.40 (d, *J* = 6.5 Hz, 1H), 6.79 (s, 1H), 6.52 (s, 1H), 3.51 (s, 2H). <sup>13</sup>C-NMR (100 MHz, CDCl<sub>3</sub>): δ 150.0, 148.7, 144.4, 140.6, 137.0, 136.8, 134.2, 131.7, 129.2, 117.8, 110.9, 97.8. HRMS (m/z): calcd for C<sub>12</sub>H<sub>8</sub>F<sub>2</sub>N<sub>2</sub>O<sub>2</sub> [M+H]<sup>+</sup>: 251.0627, Found: 251.0632.

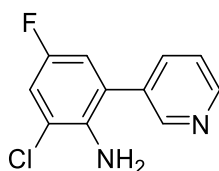

### 2-chloro-4-fluoro-6-(pyridin-3-yl)aniline (**1a-26**)

Prepared according to general procedure 1 to afford **1a-26** (293 mg, 66% yield) as a brown solid, (m.p. 126-128 °C). <sup>1</sup>H-NMR (400 MHz, CDCl<sub>3</sub>): δ 8.73-8.58 (m, 2H), 7.79 (dt, *J* = 7.9, 2.0 Hz, 1H), 7.41 (dd, *J* = 7.8, 4.8 Hz, 1H), 7.09 (dd, *J* = 8.0, 2.9 Hz, 1H), 6.79 (dd, *J* = 8.6, 2.9 Hz, 1H), 3.95 (s, 2H). <sup>13</sup>C-NMR (100 MHz, CDCl<sub>3</sub>): δ 156.0, 153.6, 149.6, 149.2, 136.6, 133.9, 123.8, 116.5, 116.3, 115.9, 115.7. HRMS (m/z): calcd for C<sub>11</sub>H<sub>8</sub>ClF<sub>2</sub>N<sub>2</sub> [M+H]<sup>+</sup>: 223.0433, Found: 223.0439.

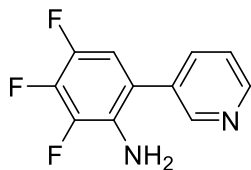

### 2,3,4-trifluoro-6-(pyridin-3-yl)aniline (**1a-27**)

Prepared according to general procedure 1 to afford **1a-27** (278 mg, 62% yield) as a white solid, (m.p. 142-143 °C). <sup>1</sup>H-NMR (400 MHz, CDCl<sub>3</sub>): δ 8.63 (dd, *J* = 12.7, 3.5 Hz, 2H), 7.75 (d, *J* = 7.6 Hz, 1H), 7.39 (dd, *J* = 7.8, 4.9 Hz, 1H), 6.76 (t, *J* = 8.7 Hz, 1H), 3.76 (s, 2H). <sup>13</sup>C-NMR (100 MHz, CDCl<sub>3</sub>): δ 149.7, 149.3, 144.8 (d, *J* = 6.9 Hz), 142.4 (d, *J* = 13.7 Hz), 141.3, 136.4, 132.7, 130.2 (d, *J* = 10.2 Hz), 123.7, 118.8, 112.4 (dd, *J* = 14.9, 3.4 Hz). HRMS (m/z): calcd for C<sub>11</sub>H<sub>7</sub>F<sub>3</sub>N<sub>2</sub> [M+H]<sup>+</sup>: 225.0634, Found: 225.0633.

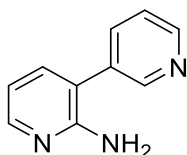

### [3,3'-bipyridin]-2-amine (**1a-28**)<sup>[6]</sup>

Prepared according to general procedure 1 to afford **1a-28** (250 mg, 73% yield) as a gray solid. <sup>1</sup>H-NMR (400 MHz, CDCl<sub>3</sub>): δ 8.66 (s, 1H), 8.57 (d, *J* = 4.7 Hz, 1H), 8.06 (d, *J* = 5.0 Hz, 1H), 7.77 (d, *J* = 7.8 Hz, 1H), 7.34 (dd, *J* = 14.8, 6.2 Hz, 2H), 6.73 (dd, *J* = 7.3, 4.9 Hz, 1H), 4.71 (s, 2H). <sup>13</sup>C-NMR (100 MHz, CDCl<sub>3</sub>): δ 156.0, 149.7, 149.0, 148.1, 138.2, 136.1, 133.9, 123.7, 118.1, 114.5. HRMS (m/z): calcd for C<sub>10</sub>H<sub>9</sub>N<sub>3</sub> [M+H]<sup>+</sup>: 172.0869, Found: 172.0865.

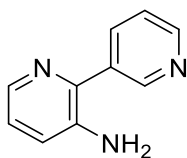

### [2,3'-bipyridin]-3-amine (**1a-29**)<sup>[7]</sup>

Prepared according to general procedure 1 to afford **1a-29** (250 mg, 68% yield) as a gray solid. <sup>1</sup>H-NMR (400 MHz, CDCl<sub>3</sub>): δ 8.88 (s, 1H), 8.54 (s, 1H), 8.06 (d, *J* = 2.1

Hz, 1H), 7.95 (d,  $J = 7.4$  Hz, 1H), 7.36-7.29 (m, 1H), 7.02 (s, 2H), 3.61 (s, 2H).  $^{13}\text{C}$ -NMR (100 MHz,  $\text{CDCl}_3$ ):  $\delta$  149.4, 149.2, 141.5, 140.5, 140.3, 136.2, 134.5, 123.8, 123.6, 123.1. HRMS ( $m/z$ ): calcd for  $\text{C}_{10}\text{H}_9\text{N}_3$   $[\text{M}+\text{H}]^+$ : 172.0869, Found: 172.0865.

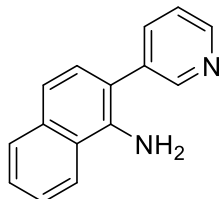

### 2-(pyridin-3-yl)naphthalen-1-amine (1a-30)

Prepared according to general procedure 1 to afford **1a-30** (440 mg, 75% yield) as a brown solid, (m.p. 117-119 °C).  $^1\text{H}$ -NMR (400 MHz,  $\text{CDCl}_3$ ):  $\delta$  8.80 (d,  $J = 1.5$  Hz, 1H), 8.61 (dd,  $J = 4.8, 1.7$  Hz, 1H), 7.88-7.79 (m, 3H), 7.52-7.45 (m, 2H), 7.37 (dt,  $J = 7.8, 2.1$  Hz, 2H), 7.24 (d,  $J = 8.4$  Hz, 1H), 4.36 (s, 2H).  $^{13}\text{C}$ -NMR (100 MHz,  $\text{CDCl}_3$ ):  $\delta$  150.5, 148.3, 139.2, 137.1, 135.9, 134.0, 128.6, 128.2, 126.3, 125.5, 123.8, 123.4, 121.2, 118.7, 117.8. HRMS ( $m/z$ ): calcd for  $\text{C}_{15}\text{H}_{12}\text{N}_2$   $[\text{M}+\text{H}]^+$ : 221.1073, Found: 221.1070.

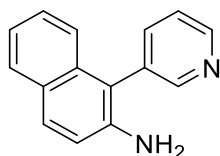

### 1-(pyridin-3-yl)naphthalen-2-amine (1a-31)

Prepared according to general procedure 1 to afford **1a-31** (304 mg, 69% yield) as a red solid, (m.p. 148-150 °C).  $^1\text{H}$ -NMR (400 MHz,  $\text{CDCl}_3$ ):  $\delta$  8.62 (dt,  $J = 4.6, 2.1$  Hz, 1H), 8.56 (t,  $J = 2.3$  Hz, 1H), 7.70-7.61 (m, 3H), 7.40 (ddd,  $J = 7.6, 4.9, 2.4$  Hz, 1H), 7.24-7.13 (m, 2H), 7.11 (dd,  $J = 8.2, 2.0$  Hz, 1H), 6.95 (dd,  $J = 8.8, 2.4$  Hz, 1H), 3.52 (s, 2H).  $^{13}\text{C}$ -NMR (100 MHz,  $\text{CDCl}_3$ ):  $\delta$  151.9, 148.8, 141.7, 139.0, 133.7, 133.1, 129.6, 128.1, 127.9, 126.8, 124.1, 123.5, 122.4, 118.1, 115.4. HRMS ( $m/z$ ): calcd for  $\text{C}_{15}\text{H}_{12}\text{N}_2$   $[\text{M}+\text{H}]^+$ : 221.1073, Found: 221.1079.

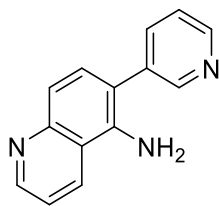

### 6-(pyridin-3-yl)quinolin-5-amine (1a-32)

Prepared according to general procedure 1 to afford **1a-32** (318 mg, 72% yield) as a red oil.  $^1\text{H-NMR}$  (400 MHz,  $\text{CDCl}_3$ ):  $\delta$  8.82 (dd,  $J = 4.1, 1.5$  Hz, 1H), 8.73-8.67 (m, 2H), 8.58 (dd,  $J = 4.8, 1.6$  Hz, 1H), 7.91 (dt,  $J = 7.8, 2.0$  Hz, 1H), 7.51 (dd,  $J = 7.8, 5.1$  Hz, 1H), 7.46-7.38 (m, 2H), 7.33 (d,  $J = 8.6$  Hz, 1H), 5.76 (s, 2H).  $^{13}\text{C-NMR}$  (100 MHz,  $\text{CDCl}_3$ ):  $\delta$  150.6, 150.4, 149.0, 148.3, 142.1, 137.2, 135.9, 132.6, 131.8, 124.3, 120.0, 118.3, 117.4, 116.3. HRMS ( $m/z$ ): calcd for  $\text{C}_{14}\text{H}_{11}\text{N}_3$   $[\text{M}+\text{H}]^+$ : 222.1026, Found: 222.1020.

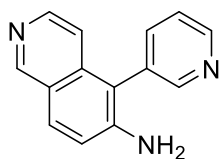

### 5-(pyridin-3-yl)isoquinolin-6-amine (1a-33)

Prepared according to general procedure 1 to afford **1a-33** (344 mg, 78% yield) as a gray solid, (m.p. 231-233 °C).  $^1\text{H-NMR}$  (400 MHz,  $\text{CDCl}_3$ ):  $\delta$  8.56 (s, 1H), 7.97 (s, 1H), 7.58 (d,  $J = 9.1$  Hz, 1H), 7.26-7.14 (m, 3H), 6.84 (t,  $J = 7.3$  Hz, 1H), 6.78 (d,  $J = 8.0$  Hz, 1H), 6.55 (s, 1H), 3.78 (s, 2H).  $^{13}\text{C-NMR}$  (100 MHz,  $\text{CDCl}_3$ ):  $\delta$  151.7, 151.2, 149.5, 145.9, 143.1, 138.7, 137.0, 131.3, 129.8, 124.3, 123.1, 119.1, 116.5. HRMS ( $m/z$ ): calcd for  $\text{C}_{14}\text{H}_{11}\text{N}_3$   $[\text{M}+\text{H}]^+$ : 222.1026, Found: 222,1035.

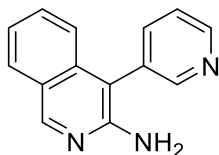

### 4-(pyridin-3-yl)isoquinolin-3-amine (1a-34)

Prepared according to general procedure 1 to afford **1a-34** (322 mg, 73% yield) as a yellow solid, (m.p. 118-120 °C). <sup>1</sup>H-NMR (400 MHz, CDCl<sub>3</sub>): δ 8.82 (s, 1H), 8.64-8.54 (m, 2H), 7.73 (d, *J* = 8.4 Hz, 1H), 7.67 (dt, *J* = 7.8, 1.9 Hz, 1H), 7.39 (dd, *J* = 7.8, 4.9 Hz, 1H), 7.34 (ddd, *J* = 8.4, 6.8, 1.3 Hz, 1H), 7.20-7.13 (m, 1H), 7.10 (d, *J* = 8.6 Hz, 1H), 4.37 (s, 2H). <sup>13</sup>C-NMR (100 MHz, CDCl<sub>3</sub>): δ 152.1, 152.1, 151.6, 149.2, 138.5, 137.3, 131.8, 130.9, 128.1, 124.1, 123.7, 122.9, 122.2, 107.2. HRMS (m/z): calcd for C<sub>14</sub>H<sub>11</sub>N<sub>3</sub> [M+H]<sup>+</sup>: 222.1026, Found: 222.1025.

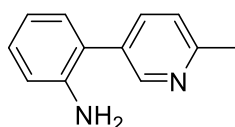

### 2-(6-methylpyridin-3-yl)aniline (**1b-1**)<sup>[2]</sup>

Prepared according to general procedure 1 to afford **1b-1** (272 mg, 74% yield) as a grey solid. <sup>1</sup>H-NMR (400 MHz, CDCl<sub>3</sub>): δ 8.52 (s, 1H), 7.63 (dd, *J* = 8.0, 2.3 Hz, 1H), 7.19-7.15 (m, 1H), 7.11 (td, *J* = 7.7, 1.6 Hz, 1H), 7.02 (dd, *J* = 7.6, 1.6 Hz, 1H), 6.77 (td, *J* = 7.4, 1.1 Hz, 1H), 6.70 (dd, *J* = 8.1, 1.1 Hz, 1H), 3.59 (s, 2H), 2.54 (s, 3H). <sup>13</sup>C-NMR (100 MHz, CDCl<sub>3</sub>): δ 157.1, 149.1, 143.8, 137.0, 132.2, 130.5, 129.1, 123.8, 123.2, 118.9, 115.8, 24.1. HRMS (m/z): calcd for C<sub>12</sub>H<sub>12</sub>N<sub>2</sub> [M+H]<sup>+</sup>:185.1073, Found: 185.1068.

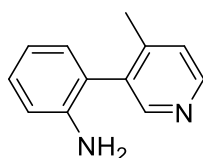

### 2-(4-methylpyridin-3-yl)aniline (**1b-2**)<sup>[8]</sup>

Prepared according to general procedure 1 to afford **1b-2** (346 mg, 94% yield) as a yellow oil. <sup>1</sup>H-NMR (400 MHz, CDCl<sub>3</sub>): δ 8.46-8.31 (m, 2H), 7.15 (ddd, *J* = 9.2, 6.4, 2.5 Hz, 2H), 6.94 (d, *J* = 6.9 Hz, 1H), 6.80-6.70 (m, 2H), 3.69 (s, 2H), 2.17 (s, 3H). <sup>13</sup>C-NMR (100 MHz, CDCl<sub>3</sub>): δ 150.3, 148.6, 146.7, 144.3, 135.0, 130.2, 129.2, 125.2, 122.9, 118.1, 115.2, 19.2. HRMS (m/z): calcd for C<sub>12</sub>H<sub>12</sub>N<sub>2</sub> [M+H]<sup>+</sup>:185.1073, Found: 185.1081.



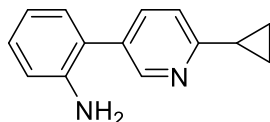

### 2-(6-cyclopropylpyridin-3-yl)aniline (**1b-3**)

Prepared according to general procedure 1 to afford **1b-3** (403 mg, 80% yield) as a yellow oil.  $^1\text{H-NMR}$  (400 MHz,  $\text{CDCl}_3$ ):  $\delta$  8.53 (s, 1H), 7.66 (dd,  $J = 8.1, 2.0$  Hz, 1H), 7.21-7.17 (m, 2H), 7.08 (d,  $J = 7.5$  Hz, 1H), 6.83 (t,  $J = 7.4$  Hz, 1H), 6.77 (d,  $J = 8.0$  Hz, 1H), 3.62 (s, 2H), 2.13-2.05 (m, 1H), 1.08-1.02 (m, 4H).  $^{13}\text{C-NMR}$  (100 MHz,  $\text{CDCl}_3$ ):  $\delta$  161.7, 149.3, 143.8, 136.5, 131.8, 130.5, 129.0, 124.0, 121.0, 118.8, 115.7, 17.0, 10.0. HRMS ( $m/z$ ): calcd for  $\text{C}_{14}\text{H}_{14}\text{N}_2$   $[\text{M}+\text{H}]^+$ : 211.1230, Found: 211.1242.

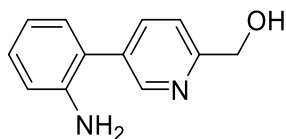

### (5-(2-aminophenyl)pyridin-2-yl)methanol (**1b-4**)

Prepared according to general procedure 1 to afford **1b-4** (352 mg, 88% yield) as a yellow solid, (m.p. 100-101  $^\circ\text{C}$ ).  $^1\text{H-NMR}$  (400 MHz,  $\text{CDCl}_3$ ):  $\delta$  8.59 (s, 1H), 7.82-7.76 (m, 1H), 7.38 (d,  $J = 8.0$  Hz, 1H), 7.17 (t,  $J = 7.7$  Hz, 1H), 7.06 (d,  $J = 7.5$  Hz, 1H), 6.82 (t,  $J = 7.4$  Hz, 1H), 6.76 (d,  $J = 8.0$  Hz, 1H), 4.79 (s, 2H), 3.96 (s, 3H).  $^{13}\text{C-NMR}$  (100 MHz,  $\text{CDCl}_3$ ):  $\delta$  157.8, 148.6, 143.8, 137.5, 134.0, 130.6, 129.4, 123.4, 120.5, 119.0, 115.9, 64.1. HRMS ( $m/z$ ): calcd for  $\text{C}_{12}\text{H}_{12}\text{N}_2\text{O}$   $[\text{M}+\text{H}]^+$ : 201.1022, Found: 201.1018.

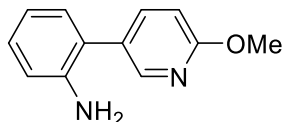

### 2-(6-methoxypyridin-3-yl)aniline (**1b-5**)

Prepared according to general procedure 1 to afford **1b-5** (280 mg, 70% yield) as a yellow oil.  $^1\text{H-NMR}$  (400 MHz,  $\text{CDCl}_3$ ):  $\delta$  8.26 (s, 1H), 7.69 (d,  $J = 8.5$  Hz, 1H), 7.16 (t,  $J = 7.6$  Hz, 1H), 7.09 (d,  $J = 7.6$  Hz, 1H), 6.83 (t,  $J = 7.5$  Hz, 2H), 6.75 (d,  $J = 8.2$

Hz, 1H), 3.98 (s, 3H), 3.68 (s, 2H).  $^{13}\text{C}$ -NMR (100 MHz,  $\text{CDCl}_3$ ):  $\delta$  163.3, 146.8, 144.0, 139.5, 130.6, 128.9, 128.2, 123.8, 118.8, 115.7, 110.8, 53.5. HRMS ( $m/z$ ): calcd for  $\text{C}_{12}\text{H}_{12}\text{N}_2\text{O}$   $[\text{M}+\text{H}]^+$ :201.1022, Found: 201.1028.

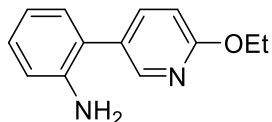

### 2-(6-ethoxypyridin-3-yl)aniline (**1b-6**)

Prepared according to general procedure 1 to afford **1b-6** (385 mg, 90% yield) as a yellow solid, (m.p. 49-50 °C).  $^1\text{H}$ -NMR (400 MHz,  $\text{CDCl}_3$ ):  $\delta$  8.25 (dd,  $J = 2.5, 0.8$  Hz, 1H), 7.66 (dd,  $J = 8.5, 2.5$  Hz, 1H), 7.18-7.12 (m, 1H), 7.08 (dd,  $J = 7.6, 1.6$  Hz, 1H), 6.84-6.76 (m, 2H), 6.72 (d,  $J = 7.8$  Hz, 1H), 4.42 (q,  $J = 7.0$  Hz, 2H), 3.75 (s, 2H), 1.44 (t,  $J = 7.1$  Hz, 3H).  $^{13}\text{C}$ -NMR (100 MHz,  $\text{CDCl}_3$ ):  $\delta$  163.0, 146.8, 144.2, 139.5, 130.6, 128.8, 128.1, 123.9, 118.7, 115.7, 110.9, 61.8, 14.8. HRMS ( $m/z$ ): calcd for  $\text{C}_{13}\text{H}_{14}\text{N}_2\text{O}$   $[\text{M}+\text{H}]^+$ :215.1179, Found: 215.1189.

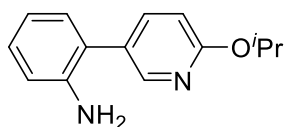

### 2-(6-isopropoxy)pyridin-3-yl)aniline (**1b-7**)

Prepared according to general procedure 1 to afford **1b-7** (342 mg, 75% yield) as a red oil.  $^1\text{H}$ -NMR (400 MHz,  $\text{CDCl}_3$ ):  $\delta$  8.23 (d,  $J = 2.5$  Hz, 1H), 7.67 (dd,  $J = 8.5, 2.5$  Hz, 1H), 7.20-7.13 (m, 1H), 7.10 (dd,  $J = 7.5, 1.6$  Hz, 1H), 6.83 (td,  $J = 7.4, 1.2$  Hz, 1H), 6.77 (d,  $J = 8.2$  Hz, 2H), 5.36 (hept,  $J = 6.2$  Hz, 1H), 3.61 (s, 2H), 1.40 (d,  $J = 6.2$  Hz, 6H).  $^{13}\text{C}$ -NMR (100 MHz,  $\text{CDCl}_3$ ):  $\delta$  162.7, 146.8, 144.0, 139.5, 130.6, 128.8, 127.7, 124.0, 118.8, 115.6, 111.4, 68.1, 22.2. HRMS ( $m/z$ ): calcd for  $\text{C}_{14}\text{H}_{16}\text{N}_2\text{O}$   $[\text{M}+\text{H}]^+$ : 229.1335, Found: 229.1330.

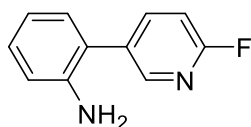

### 2-(6-fluoropyridin-3-yl)aniline (**1b-8**)<sup>[5]</sup>

Prepared according to general procedure 1 to afford **1b-8** (275 mg, 73% yield) as a gray solid, (m.p. 85-87 °C). <sup>1</sup>H-NMR (400 MHz, CDCl<sub>3</sub>): δ 8.30 (s, 1H), 7.91 (t, *J* = 8.0 Hz, 1H), 7.20 (t, *J* = 7.6 Hz, 1H), 7.08 (d, *J* = 7.8 Hz, 1H), 7.01 (d, *J* = 8.1 Hz, 1H), 6.85 (tdd, *J* = 7.5, 2.1, 1.1 Hz, 1H), 6.79 (d, *J* = 7.9 Hz, 1H), 3.64 (s, 2H). <sup>13</sup>C-NMR (100 MHz, CDCl<sub>3</sub>): δ 164.0, 161.6, 147.7 (d, *J* = 14.4 Hz), 143.8, 141.9 (d, *J* = 7.9 Hz), 133.0 (d, *J* = 4.7 Hz), 130.5, 129.5, 119.0, 116.0, 109.5 (d, *J* = 35.1 Hz). HRMS (m/z): calcd for C<sub>11</sub>H<sub>9</sub>N<sub>2</sub>F [M+H]<sup>+</sup>: 189.0823, Found: 189.0835.

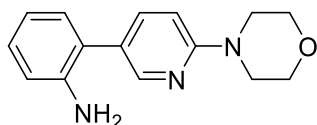

### 2-(6-morpholinopyridin-3-yl)aniline (**1b-9**)

Prepared according to general procedure 1 to afford **1b-9** (433 mg, 85% yield) as a brown solid, (m.p. 120-122 °C). <sup>1</sup>H-NMR (400 MHz, CDCl<sub>3</sub>): δ 8.29 (s, 1H), 7.64 (dd, *J* = 8.7, 2.4 Hz, 1H), 7.15 (t, *J* = 7.6 Hz, 1H), 7.08 (d, *J* = 7.6 Hz, 1H), 6.82 (t, *J* = 7.4 Hz, 1H), 6.74 (dd, *J* = 16.0, 8.3 Hz, 2H), 3.85 (t, *J* = 4.9 Hz, 4H), 3.67 (s, 2H), 3.54 (t, *J* = 4.9 Hz, 4H). <sup>13</sup>C-NMR (100 MHz, CDCl<sub>3</sub>): δ 158.5, 147.8, 144.0, 138.4, 130.5, 128.6, 125.0, 124.3, 118.8, 115.6, 106.7, 66.8, 45.6. HRMS (m/z): calcd for C<sub>15</sub>H<sub>17</sub>N<sub>3</sub>O [M+H]<sup>+</sup>: 256.1444, Found: 256.1454.

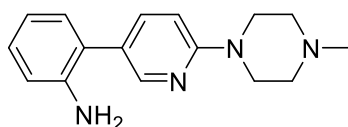

### 2-(6-(4-methylpiperazin-1-yl)pyridin-3-yl)aniline (**1b-10**)

Prepared according to general procedure 1 to afford **1b-10** (429 mg, 80% yield) as a yellow solid, (m.p. 130-132 °C). <sup>1</sup>H-NMR (400 MHz, CDCl<sub>3</sub>): δ 8.28 (d, *J* = 2.4 Hz, 1H), 7.62 (dd, *J* = 8.7, 2.5 Hz, 1H), 7.14 (t, *J* = 7.6 Hz, 1H), 7.08 (d, *J* = 7.5 Hz, 1H), 6.82 (t, *J* = 7.4 Hz, 1H), 6.78-6.70 (m, 2H), 3.70 (s, 2H), 3.66 (t, *J* = 5.2 Hz, 4H), 2.61 (t, *J* = 5.0 Hz, 4H), 2.41 (s, 3H). <sup>13</sup>C-NMR (100 MHz, CDCl<sub>3</sub>): δ 158.4, 147.9, 144.1,

138.2, 130.4, 128.4, 124.4, 124.4, 118.6, 115.5, 106.8, 54.9, 46.2, 45.1. HRMS (m/z): calcd for C<sub>16</sub>H<sub>20</sub>N<sub>4</sub> [M+H]<sup>+</sup>: 269.1761, Found: 269.1769.

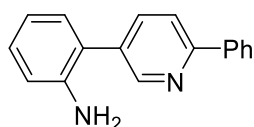

### 2-(6-phenylpyridin-3-yl)aniline (**1b-11**)

Prepared according to general procedure 1 to afford **1b-11** (393 mg, 80% yield) as a pale brown solid, (m.p. 90-92 °C). <sup>1</sup>H-NMR (400 MHz, CDCl<sub>3</sub>): δ 8.81 (d, *J* = 2.4 Hz, 1H), 8.05 (d, *J* = 7.1 Hz, 2H), 7.90 (dd, *J* = 8.2, 2.3 Hz, 1H), 7.82 (d, *J* = 8.0 Hz, 1H), 7.54-7.48 (m, 2H), 7.45 (t, *J* = 7.3 Hz, 1H), 7.25-7.16 (m, 2H), 6.89 (t, *J* = 7.5 Hz, 1H), 6.81 (d, *J* = 8.0 Hz, 1H), 3.69 (s, 2H). <sup>13</sup>C-NMR (100 MHz, CDCl<sub>3</sub>): δ 156.0, 149.8, 143.9, 138.9, 137.3, 133.6, 131, 130.5, 129.3, 129.1, 128.8, 126.8, 123.6, 120.4, 119.0, 118.8, 115.9. HRMS (m/z): calcd for C<sub>17</sub>H<sub>14</sub>N<sub>2</sub> [M+H]<sup>+</sup>: 247.1230, Found: 247.1234.

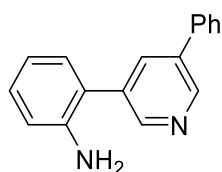

### 2-(5-phenylpyridin-3-yl)aniline (**1b-12**)

Prepared according to general procedure 1 to afford **1b-12** (413 mg, 84% yield) as a yellow solid, (m.p. 152-154 °C). <sup>1</sup>H-NMR (400 MHz, CDCl<sub>3</sub>): δ 8.76 (s, 1H), 8.62 (s, 1H), 7.95 (s, 1H), 7.57-7.51 (m, 2H), 7.41 (t, *J* = 7.4 Hz, 2H), 7.35 (dd, *J* = 7.1, 1.7 Hz, 1H), 7.14 (tt, *J* = 7.8, 1.7 Hz, 1H), 7.09 (d, *J* = 7.6 Hz, 1H), 6.80 (t, *J* = 7.5 Hz, 1H), 6.73 (d, *J* = 8.0 Hz, 1H), 3.54 (s, 2H). <sup>13</sup>C-NMR (100 MHz, CDCl<sub>3</sub>): δ 148.4, 146.7, 143.8, 137.4, 136.6, 135.3, 135.0, 130.6, 129.5, 129.1, 128.3, 127.2, 124.4, 124.0, 123.5, 119.0, 115.9. HRMS (m/z): calcd for C<sub>17</sub>H<sub>14</sub>N<sub>2</sub> [M+H]<sup>+</sup>: 247.1230, Found: 247.1128.

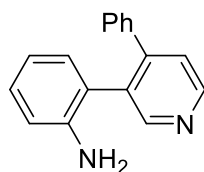

### 2-(4-phenylpyridin-3-yl)aniline (**1b-13**)

Prepared according to general procedure 1 to afford **1b-13** (403 mg, 82% yield) as a yellow solid, (m.p. 140-141 °C). <sup>1</sup>H-NMR (400 MHz, CDCl<sub>3</sub>): δ 8.63 (d, *J* = 19.1 Hz, 2H), 7.40 (s, 1H), 7.25 (s, 5H), 7.09 (t, *J* = 7.6 Hz, 1H), 6.95 (d, *J* = 7.5 Hz, 1H), 6.71 (t, *J* = 7.2 Hz, 1H), 6.60 (d, *J* = 8.0 Hz, 1H), 3.37 (s, 2H). <sup>13</sup>C-NMR (100 MHz, CDCl<sub>3</sub>): δ 151.8, 149.1, 148.6, 143.9, 138.2, 131.3, 129.1, 128.5, 128.3, 128.3, 123.1, 118.5, 115.5. HRMS (m/z): calcd for C<sub>17</sub>H<sub>14</sub>N<sub>2</sub> [M+H]<sup>+</sup>: 247.1230, Found: 247.1238.

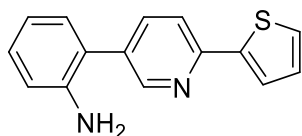

### 2-(6-(thiophen-2-yl)pyridin-3-yl)aniline (**1b-14**)

Prepared according to general procedure 1 to afford **1b-14** (413 mg, 82% yield) as a gray solid, (m.p. 78-80 °C). <sup>1</sup>H-NMR (400 MHz, CDCl<sub>3</sub>): δ 8.68 (s, 1H), 7.86-7.79 (m, 1H), 7.73 (d, *J* = 8.1 Hz, 1H), 7.65 (d, *J* = 3.4 Hz, 1H), 7.42 (d, *J* = 5.0 Hz, 1H), 7.20 (t, *J* = 7.7 Hz, 1H), 7.16-7.09 (m, 2H), 6.86 (t, *J* = 7.5 Hz, 1H), 6.79 (d, *J* = 8.0 Hz, 1H), 3.74 (s, 2H). <sup>13</sup>C-NMR (100 MHz, CDCl<sub>3</sub>): δ 151.3, 149.7, 143.9, 137.2, 133.4, 131.0, 130.4, 129.3, 128.2, 127.7, 124.7, 123.5, 119.0, 118.6, 115.9. HRMS (m/z): calcd for C<sub>15</sub>H<sub>12</sub>N<sub>2</sub>S [M+H]<sup>+</sup>: 253.0794, Found: 253.0805.

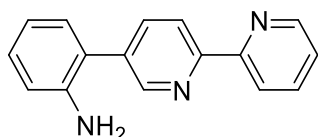

### 2-([2,2'-bipyridin]-5-yl)aniline (**1b-15**)<sup>[9]</sup>

Prepared according to general procedure 1 to afford **1b-15** (430 mg, 87% yield) as a brown solid. <sup>1</sup>H-NMR (400 MHz, CDCl<sub>3</sub>): δ 8.67 (s, 1H), 8.57 (d, *J* = 4.8 Hz, 1H), 8.32 (dd, *J* = 13.9, 8.1 Hz, 2H), 7.81 (dd, *J* = 8.2, 2.2 Hz, 1H), 7.69 (t, *J* = 7.8 Hz, 1H), 7.18 (ddd, *J* = 7.5, 4.8, 1.2 Hz, 1H), 7.06 (dd, *J* = 16.6, 7.7 Hz, 2H), 6.74 (t, *J* = 7.5 Hz, 1H), 6.66 (d, *J* = 8.0 Hz, 1H), 3.61 (s, 2H). <sup>13</sup>C-NMR (100 MHz, CDCl<sub>3</sub>): δ 155.8, 154.7,

149.4, 149.2, 143.9, 137.4, 137.0, 135.3, 130.5, 129.4, 123.7, 123.5, 121.0, 120.9, 118.9, 115.9. HRMS (m/z): calcd for C<sub>16</sub>H<sub>13</sub>N<sub>3</sub> [M+H]<sup>+</sup>: 248.1182, Found: 248.1183.

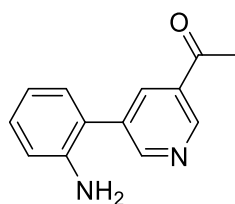

### 1-(5-(2-aminophenyl)pyridin-3-yl)ethan-1-one (1b-16)

Prepared according to general procedure 1 to afford **1b-16** (335 mg, 79% yield) as a brown solid, (m.p. 244-245 °C). <sup>1</sup>H-NMR (400 MHz, CDCl<sub>3</sub>): δ 9.04 (d, *J* = 2.1 Hz, 1H), 8.83 (d, *J* = 2.2 Hz, 1H), 8.29 (td, *J* = 2.2, 0.6 Hz, 1H), 7.20-7.13 (m, 1H), 7.05 (dd, *J* = 7.6, 1.6 Hz, 1H), 6.81 (t, *J* = 7.3 Hz, 1H), 6.76 (d, *J* = 8.0 Hz, 1H), 3.71 (s, 2H), 2.61 (s, 3H). <sup>13</sup>C-NMR (100 MHz, CDCl<sub>3</sub>): δ 196.7, 153.7, 148.2, 143.8, 135.8, 135.5, 132.1, 130.5, 129.8, 122.5, 119.0, 116.1, 26.8. HRMS (m/z): calcd for C<sub>13</sub>H<sub>12</sub>N<sub>2</sub>O [M+H]<sup>+</sup>: 213.1022, Found: 213.1018.

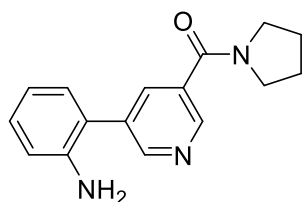

### (5-(2-aminophenyl)pyridin-3-yl)(pyrrolidin-1-yl)methanone (1b-17)

Prepared according to general procedure 1 to afford **1b-17** (432 mg, 81% yield) as a brown solid, (m.p. 135-137 °C). <sup>1</sup>H-NMR (400 MHz, CDCl<sub>3</sub>): δ 8.72 (s, 2H), 7.93 (s, 1H), 7.14-7.06 (m, 1H), 7.03 (d, *J* = 7.5 Hz, 1H), 6.80-6.67 (m, 2H), 3.75 (s, 2H), 3.59 (t, *J* = 6.8 Hz, 2H), 3.43 (t, *J* = 6.5 Hz, 2H), 1.88 (dq, *J* = 19.1, 6.8 Hz, 4H). <sup>13</sup>C-NMR (100 MHz, CDCl<sub>3</sub>): δ 166.9, 150.7, 146.4, 144.0, 135.1, 133.0, 130.5, 129.6, 122.6, 118.8, 116.0, 49.5, 46.4, 26.4, 24.4. HRMS (m/z): calcd for C<sub>16</sub>H<sub>17</sub>N<sub>3</sub>O [M+H]<sup>+</sup>: 268.1444, Found: 268.1438.

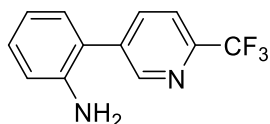

### Preparation of 2-(6-(trifluoromethyl)pyridin-3-yl)aniline (**1b-18**)

Prepared according to general procedure 1 to afford **1b-18** (371 mg, 78% yield) as a brown solid, (m.p. 45-47 °C). <sup>1</sup>H-NMR (400 MHz, CDCl<sub>3</sub>): δ 8.70 (s, 1H), 7.88 (d, *J* = 8.1 Hz, 1H), 7.64 (d, *J* = 1.6 Hz, 1H), 7.11 (tt, *J* = 7.7, 1.8 Hz, 1H), 6.98 (d, *J* = 7.6 Hz, 1H), 6.75 (t, *J* = 7.5 Hz, 1H), 6.68 (d, *J* = 7.9 Hz, 1H), 3.62 (s, 2H). <sup>13</sup>C-NMR (100 MHz, CDCl<sub>3</sub>): δ 150.2, 146.6 (q, *J* = 34.5 Hz), 143.8, 138.4, 137.8, 130.5, 130.1, 123.0, 122.2, 120.4 (q, *J* = 2.7 Hz), 119.2, 116.2. HRMS (m/z): calcd for C<sub>12</sub>H<sub>9</sub>N<sub>2</sub>F<sub>3</sub> [M+H]<sup>+</sup>: 239.0791, Found: 239,0798.

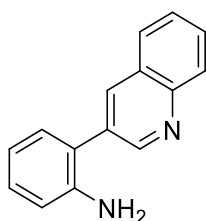

### 2-(quinolin-3-yl)aniline (**1b-19**)<sup>[5]</sup>

Prepared according to general procedure 1 to afford **1b-19** (352 mg, 80% yield) as a gray solid. <sup>1</sup>H-NMR (400 MHz, CDCl<sub>3</sub>): δ 8.95 (s, 1H), 8.18 (s, 1H), 8.07 (d, *J* = 8.5 Hz, 1H), 7.76 (d, *J* = 8.2 Hz, 1H), 7.69-7.63 (m, 1H), 7.50 (t, *J* = 7.5 Hz, 1H), 7.19-7.10 (m, 2H), 6.82 (t, *J* = 7.5 Hz, 1H), 6.75 (d, *J* = 8.0 Hz, 1H), 3.36 (s, 2H). <sup>13</sup>C-NMR (100 MHz, CDCl<sub>3</sub>): δ 151.4, 147.0, 144.0, 135.5, 132.4, 130.8, 129.6, 129.4, 129.2, 127.9, 127.8, 127.0, 123.7, 119.1, 116.0. HRMS (m/z): calcd for C<sub>15</sub>H<sub>12</sub>N<sub>2</sub> [M+H]<sup>+</sup>: 221.1073, Found: 221.1082.

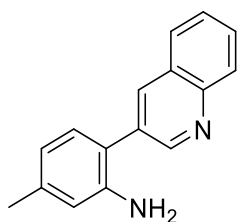

### 5-methyl-2-(quinolin-3-yl)aniline (**1b-20**)

Prepared according to general procedure 1 to afford **1b-20** (360 mg, 77% yield) as a gray solid, (m.p. 125-127 °C). <sup>1</sup>H-NMR (400 MHz, CDCl<sub>3</sub>): δ 9.02 (s, 1H), 8.24 (s, 1H), 8.14 (d, *J* = 8.5 Hz, 1H), 7.83 (d, *J* = 8.1 Hz, 1H), 7.73 (t, *J* = 7.6 Hz, 1H), 7.60-7.54 (m, 1H), 7.11 (d, *J* = 7.6 Hz, 1H), 6.73 (d, *J* = 7.7 Hz, 1H), 6.66 (s, 1H), 3.76 (s, 2H), 2.34 (s, 3H). <sup>13</sup>C-NMR (100 MHz, CDCl<sub>3</sub>): δ 151.7, 147.0, 143.8, 139.5, 135.3, 132.5, 130.7, 129.4, 129.2, 128.0, 127.8, 126.9, 121.0, 120.1, 116.6, 21.3. HRMS (m/z): calcd for C<sub>16</sub>H<sub>14</sub>N<sub>2</sub> [M+H]<sup>+</sup>: 235.1230, Found: 235.1240.

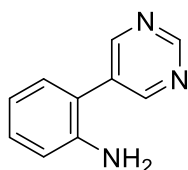

### 2-(pyrimidin-5-yl)aniline (**1b-21**)<sup>[10]</sup>

Prepared according to general procedure 1 to afford **1b-21** (280 mg, 82% yield) as a brown solid. <sup>1</sup>H-NMR (400 MHz, CDCl<sub>3</sub>): δ 9.12 (s, 1H), 8.80 (d, *J* = 2.2 Hz, 2H), 7.20-7.14 (m, 1H), 7.02 (dt, *J* = 7.5, 1.8 Hz, 1H), 6.83-6.73 (m, 1H), 6.74 (dd, *J* = 8.1, 1.3 Hz, 1H), 3.68 (s, 2H). <sup>13</sup>C-NMR (100 MHz, CDCl<sub>3</sub>): δ 157.4, 157.0, 143.8, 133.4, 130.5, 130.2, 119.9, 119.3, 116.2. HRMS (m/z): calcd for C<sub>10</sub>H<sub>9</sub>N<sub>3</sub> [M+H]<sup>+</sup>: 172.0869, Found: 172.0867.

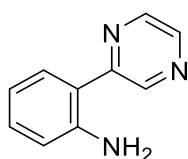

### 2-(pyrazin-2-yl)aniline (**1b-22**)<sup>[11]</sup>

Prepared according to general procedure 1 to afford **1b-22** (273 mg, 80% yield) as a yellowish-brown solid. <sup>1</sup>H-NMR (400 MHz, CDCl<sub>3</sub>): δ 8.99 (s, 1H), 8.51 (s, 1H), 8.42 (d, *J* = 2.6 Hz, 1H), 7.60 (d, *J* = 7.8 Hz, 1H), 7.25-7.18 (m, 1H), 6.84-6.74 (m, 2H), 5.37 (s, 2H). <sup>13</sup>C-NMR (100 MHz, CDCl<sub>3</sub>): δ 154.8, 147.2, 143.7, 141.8, 141.1, 131.0, 129.0, 118.5, 117.8, 117.4. HRMS (m/z): calcd for C<sub>10</sub>H<sub>9</sub>N<sub>3</sub> [M+H]<sup>+</sup>: 172.0869, Found: 172.0867.



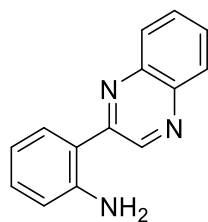

### 2-(quinoxalin-2-yl)aniline (**1b-23**)<sup>[12]</sup>

Prepared according to general procedure 1 to afford **1b-23** (353 mg, 80% yield) as a yellow solid. <sup>1</sup>H-NMR (400 MHz, CDCl<sub>3</sub>): δ 9.20 (s, 1H), 7.97 (dd, *J* = 7.9, 1.9 Hz, 1H), 7.90 (dd, *J* = 8.1, 1.6 Hz, 1H), 7.71 (dd, *J* = 8.0, 1.5 Hz, 1H), 7.65-7.56 (m, 2H), 7.14 (ddd, *J* = 8.4, 7.2, 1.5 Hz, 1H), 6.76-6.69 (m, 2H), 5.64 (s, 2H). <sup>13</sup>C-NMR (100 MHz, CDCl<sub>3</sub>): δ 153.5, 148.1, 144.6, 140.4, 140.1, 131.3, 130.1, 129.3, 129.0, 129.0, 128.6, 118.1, 117.5, 117.5. HRMS (*m/z*): calcd for C<sub>14</sub>H<sub>11</sub>N<sub>3</sub> [M+H]<sup>+</sup>: 222.1026, Found: 222.1030.

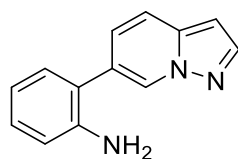

### 2-(pyrazolo[1,5-*a*]pyridin-6-yl)aniline (**1b-24**)

Prepared according to general procedure 1 to afford **1b-24** (301 mg, 72% yield) as a brown oil. <sup>1</sup>H-NMR (400 MHz, CDCl<sub>3</sub>): δ 8.55 (s, 1H), 7.96 (d, *J* = 2.3 Hz, 1H), 7.57 (d, *J* = 9.1 Hz, 1H), 7.25-7.13 (m, 3H), 6.83 (td, *J* = 7.4, 1.1 Hz, 1H), 6.77 (d, *J* = 8.0 Hz, 1H), 6.53 (d, *J* = 2.3 Hz, 1H), 3.69 (s, 2H). <sup>13</sup>C-NMR (100 MHz, CDCl<sub>3</sub>): δ 144.2, 142.2, 139.1, 130.6, 129.3, 127.7, 125.5, 123.9, 123.0, 118.8, 118.0, 115.8, 96.9. HRMS (*m/z*): calcd for C<sub>13</sub>H<sub>11</sub>N<sub>3</sub> [M+H]<sup>+</sup>: 210.1026, Found: 210.1024.

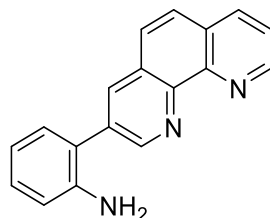

### 2-(1,10-phenanthrolin-3-yl)aniline (**1b-25**)

Prepared according to general procedure 1 to afford **1b-25** (443 mg, 80% yield) as a red solid, (m.p. 160-162 °C). <sup>1</sup>H-NMR (400 MHz, CDCl<sub>3</sub>): δ 9.14 (s, 1H), 9.07 (d, *J* = 3.6 Hz, 1H), 8.33 (d, *J* = 2.2 Hz, 1H), 8.28 (dd, *J* = 8.1, 1.7 Hz, 1H), 7.82 (s, 2H), 7.62 (dd, *J* = 8.1, 4.4 Hz, 1H), 7.19 (t, *J* = 7.3 Hz, 1H), 7.09 (d, *J* = 7.6 Hz, 1H), 6.82 (dd, *J* = 13.2, 8.4 Hz, 2H), 3.57 (s, 2H). <sup>13</sup>C-NMR (100 MHz, CDCl<sub>3</sub>): δ 152.8, 149.4, 145.8, 144.2, 141.6, 136.5, 128.9, 128.6, 128.4, 128.2, 123.7, 123.2, 122.9, 122.4, 120.5, 120.3, 118.2, 111.8. HRMS (m/z): calcd for C<sub>18</sub>H<sub>13</sub>N<sub>3</sub> [M+H]<sup>+</sup>: 272.1182, Found: 282.1191.

## 2.2 General procedure 2: for the synthesis of 5-bromo-2-(pyridin-3-yl)aniline derivatives **1a-11**, **1a-21**

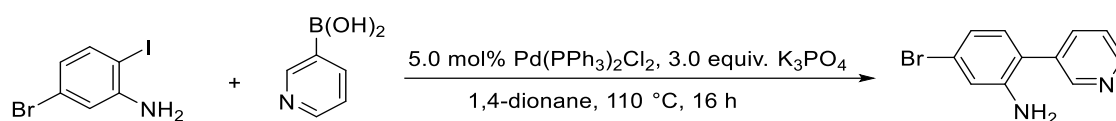

A clean, oven-dried Schlenk tube with previously placed magnetic stir-bar was charged with 5-bromo-2-iodoaniline (594 mg, 1.0 equiv.), pyridin-3-ylboronic acid (295 mg, 1.2 equiv.), Pd(PPh<sub>3</sub>)<sub>2</sub>Cl<sub>2</sub> (70.2 mg, 5.0 mmol%) and K<sub>3</sub>PO<sub>4</sub> (1.27 g, 3.0 equiv.). The reaction was evacuated and back filled with nitrogen and this sequence was repeated for three additional times. Under the positive flow of nitrogen, 1,4-dioxane (10 mL) was added to the reaction mixture. The reaction mixture was vigorously stirred at 110 °C for 16 h. Next, the reaction was allowed to cool at room temperature and the reaction mixture was extracted with ethyl acetate (3×50 mL) and brine solution (3×25 mL). The organic layer was collected and dried over anhydrous Na<sub>2</sub>SO<sub>4</sub>. The solvent was evaporated under reduced pressure and chromatographic separation with silica gel to give the desired product (**1a-11**).

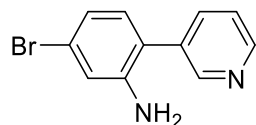

### 5-bromo-2-(pyridin-3-yl)aniline (**1a-11**)

Prepared according to general procedure 2 to afford **1a-11** (373 mg, 75% yield) as a yellow solid, (m.p. 48-50 °C). <sup>1</sup>H-NMR (400 MHz, CDCl<sub>3</sub>): δ 8.64 (d, *J* = 2.1 Hz, 1H), 8.57 (dd, *J* = 5.1, 1.7 Hz, 1H), 7.74 (dt, *J* = 7.9, 1.9 Hz, 1H), 7.35 (dd, *J* = 7.9, 4.8 Hz,

1H), 6.95-6.89 (m, 3H), 3.77 (s, 2H). <sup>13</sup>C-NMR (100 MHz, CDCl<sub>3</sub>): δ 149.8, 148.7, 145.1, 136.5, 134.3, 131.8, 123.7, 123.0, 122.4, 121.7, 118.3. HRMS (m/z): calcd for C<sub>11</sub>H<sub>9</sub>N<sub>2</sub>Br [M+H]<sup>+</sup>: 249.0022, Found: 249.0029.

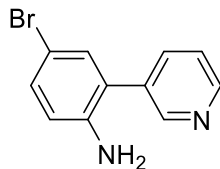

#### 4-bromo-2-(pyridin-3-yl)aniline (1a-21)

Prepared according to general procedure 2 to afford **1a-21** (348 mg, 70% yield) as a brown solid, (m.p. 72-73 °C). <sup>1</sup>H-NMR (400 MHz, CDCl<sub>3</sub>): δ 8.61 (d, *J* = 2.3 Hz, 1H), 8.54 (dd, *J* = 4.9, 1.7 Hz, 1H), 7.71 (dt, *J* = 7.9, 2.0 Hz, 1H), 7.32 (dd, *J* = 7.9, 4.8 Hz, 1H), 7.21 (dd, *J* = 8.5, 2.4 Hz, 1H), 7.16 (d, *J* = 2.3 Hz, 1H), 6.61 (d, *J* = 8.5 Hz, 1H), 3.80 (s, 2H). <sup>13</sup>C-NMR (100 MHz, CDCl<sub>3</sub>): δ 149.7, 148.8, 143.0, 136.5, 134.0, 132.8, 131.9, 125.3, 123.7, 117.4, 110.2. HRMS (m/z): calcd for C<sub>11</sub>H<sub>9</sub>BrN<sub>2</sub> [M+H]<sup>+</sup>: 249.0922, Found: 249.0029.

### 3. Detailed Reaction Optimization

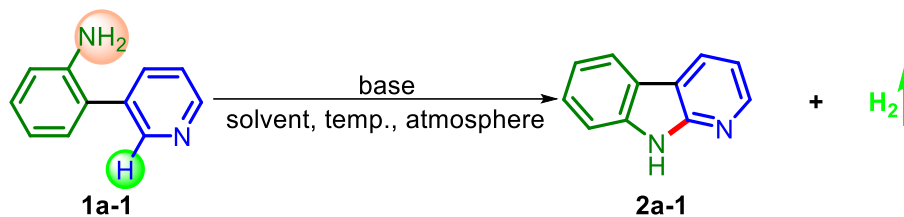

The mixture of 2-(pyridin-3-yl)aniline (68.0 mg, 0.4 mmol), base (2-10 equiv.) in dry solvent (X mL) was sealed in a 25 mL Schlenk tube in glovebox. The tube was removed from the glovebox and heated at temp.. Next, the reaction was allowed to cool at room temperature and the reaction mixture was extracted with ethyl acetate (3×50 mL) and brine solution (3×25 mL). The organic layer was collected and dried over anhydrous Na<sub>2</sub>SO<sub>4</sub>. The solvent was evaporated under reduced pressure and chromatographic separation with silica gel to give the substrate (**1a-1**) and product (**2a-1**).

**Table S1.** Screening of base type<sup>a</sup>

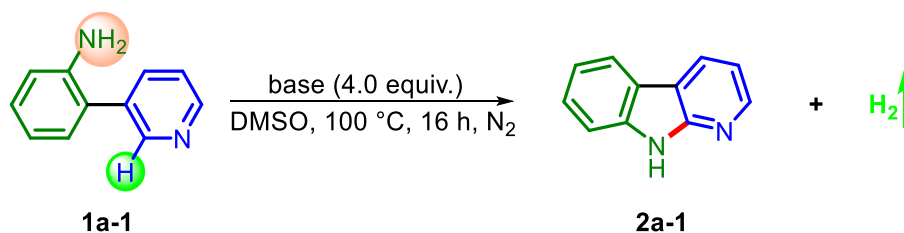

| Entry | base (4.0 equiv.)                 | Yield (%) <sup>b</sup> | Conv. (%) <sup>b</sup> |
|-------|-----------------------------------|------------------------|------------------------|
| 1     | <sup>t</sup> BuONa                | N.R.                   | 0                      |
| 2     | <sup>t</sup> BuOK                 | 25                     | 30                     |
| 3     | CH <sub>3</sub> ONa               | N.R.                   | 0                      |
| 4     | CH <sub>3</sub> OK                | N.R.                   | 0                      |
| 5     | C <sub>2</sub> H <sub>5</sub> ONa | N.R.                   | 0                      |
| 6     | C <sub>2</sub> H <sub>5</sub> OK  | N.R.                   | 0                      |
| 7     | NaOH                              | N.R.                   | 0                      |
| 8     | KOH                               | N.R.                   | 0                      |

<sup>a</sup> Reaction conditions: **1a-1** (68.0 mg, 0.4 mmol), **base** (4.0 equiv.), DMSO (4 mL), 100 °C, N<sub>2</sub> (1.0 atm), 16 h; <sup>b</sup> Isolated yield.

**Table S2.** Screening of base equivalent<sup>a</sup>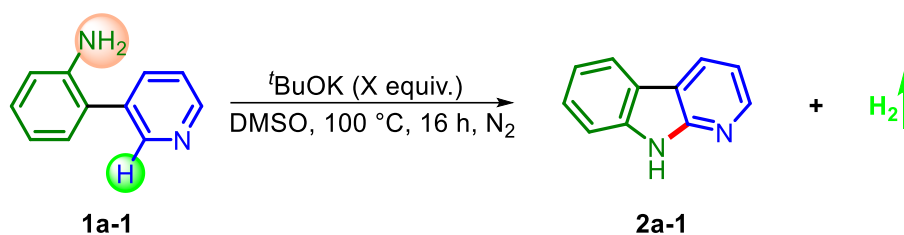

| Entry | <sup>t</sup> BuOK (X equiv.) | Yield (%) <sup>b</sup> | Conv. (%) <sup>b</sup> |
|-------|------------------------------|------------------------|------------------------|
| 1     | 2.0                          | 4                      | 5                      |
| 2     | 4.0                          | 25                     | 30                     |
| 3     | 6.0                          | 50                     | 78                     |
| 4     | 8.0                          | 60                     | 95                     |
| 5     | 10.0                         | 65                     | 100                    |

<sup>a</sup> Reaction conditions: **1a-1** (68.0 mg, 0.4 mmol), <sup>t</sup>BuOK (X equiv.), DMSO (4 mL), 100 °C, N<sub>2</sub> (1.0 atm), 16 h; <sup>b</sup> Isolated yield.

**Table S3.** Screening of solvent<sup>a</sup>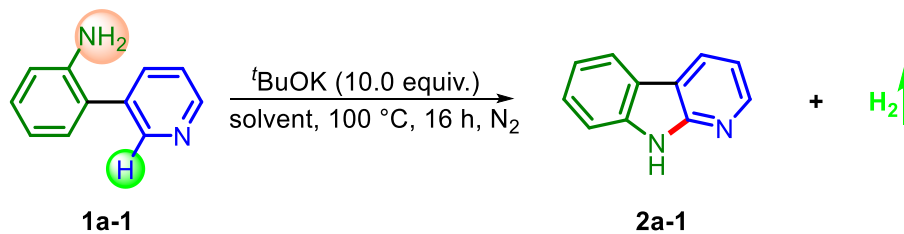

| Entry | solvent     | Yield (%) <sup>b</sup> | Conv. (%) <sup>b</sup> |
|-------|-------------|------------------------|------------------------|
| 1     | DMSO        | 65                     | 100                    |
| 2     | DMF         | 0                      | 100                    |
| 3     | 1,4-dioxane | 70                     | 90                     |
| 4     | THF         | 61                     | 90                     |
| 5     | toluene     | 96                     | 100                    |
| 6     | MeOH        | 0                      | 0                      |

<sup>a</sup> Reaction conditions: **1a-1** (68.0 mg, 0.4 mmol), <sup>t</sup>BuOK (456.0 mg, 10.0 equiv.), solvent (4 mL), 100 °C, N<sub>2</sub> (1.0 atm), 16 h; <sup>b</sup> Isolated yield.

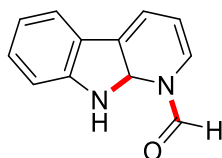

### 9,9a-dihydro-1*H*-pyrido[2,3-*b*]indole-1-carbaldehyde

The mixture of 2-(pyridin-3-yl)aniline (68.0 mg, 0.4 mmol), <sup>t</sup>BuOK (456.0 mg, 10.0 equiv.) in dry DMF (4.0 mL) was sealed in a 25 mL Schlenk tube in glovebox. The tube was removed from the glovebox and heated at 100°C for 4 hours. Next, the reaction was allowed to cool at room temperature and the reaction mixture was extracted with ethyl acetate (3×50 mL) and brine solution (3×25 mL). The organic layer was collected and dried over anhydrous Na<sub>2</sub>SO<sub>4</sub>. The solvent was evaporated under reduced pressure and chromatographic separation with silica gel to give the product **2a-DMF** (85% yield) as a faint yellow oil. <sup>1</sup>H-NMR (400 MHz, CDCl<sub>3</sub>): δ 9.61 (d, *J* = 63.3 Hz, 1H), 8.68-8.49 (m, 2H), 8.22 (d, *J* = 56.9 Hz, 1H), 7.82 (dd, *J* = 24.4, 8.6 Hz, 2H), 7.51-7.27 (m, 4H). <sup>13</sup>C-NMR (100 MHz, CDCl<sub>3</sub>): δ 162.9, 159.7, 149.6, 148.6, 137.1, 131.2, 130.4, 129.2, 126.1, 125.2, 123.2, 120.9. HRMS (*m/z*): calcd for C<sub>12</sub>H<sub>10</sub>N<sub>2</sub>O [M+H]<sup>+</sup>: 198.0793, Found: 198,0798.

**Table S4.** Screening of base equivalent<sup>a</sup>

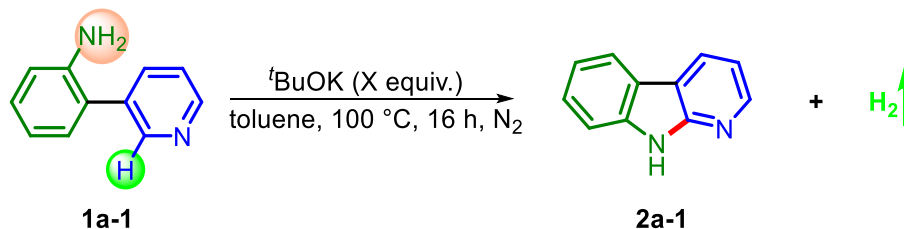

| Entry | <sup>t</sup> BuOK (X equiv.) | Yield (%) <sup>b</sup> | Conv. (%) <sup>b</sup> |
|-------|------------------------------|------------------------|------------------------|
| 1     | 2.0                          | 4                      | 5                      |
| 2     | 4.0                          | 31                     | 35                     |
| 3     | 6.0                          | 55                     | 60                     |
| 4     | 8.0                          | 79                     | 85                     |
| 5     | 9.0                          | 92                     | 95                     |
| 6     | 10.0                         | 96                     | 100                    |

<sup>a</sup> Reaction conditions: **1a-1** (68.0 mg, 0.4 mmol), <sup>t</sup>BuOK (X equiv.), toluene (4 mL), 100 °C, N<sub>2</sub> (1.0 atm), 16 h; <sup>b</sup> Isolated yield.

**Table S5.** Screening of temperature<sup>a</sup>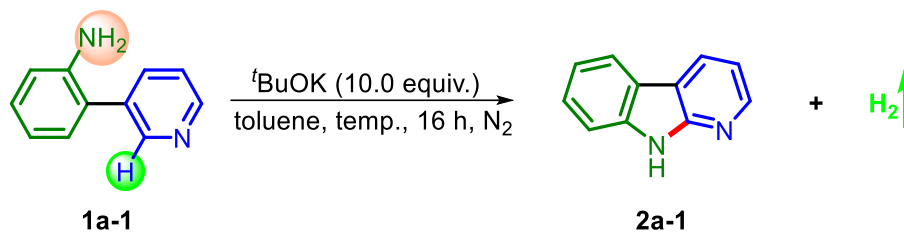

| Entry | temperature (°C) | Yield (%) <sup>b</sup> | Conv. (%) <sup>b</sup> |
|-------|------------------|------------------------|------------------------|
| 1     | 25               | 0                      | 0                      |
| 2     | 40               | 2                      | 5                      |
| 3     | 60               | 16                     | 20                     |
| 4     | 70               | 25                     | 30                     |
| 5     | 80               | 40                     | 50                     |
| 6     | 90               | 80                     | 85                     |
| 7     | 100              | 96                     | 100                    |
| 8     | 110              | 90                     | 100                    |

<sup>a</sup> Reaction conditions: **1a-1** (68.0 mg, 0.4 mmol), <sup>t</sup>BuOK (456.0 mg, 10.0 equiv.), toluene (4 mL), N<sub>2</sub> (1.0 atm), 16 h; <sup>b</sup> Isolated yield.

**Table S6.** Screening of volume of solvent<sup>a</sup>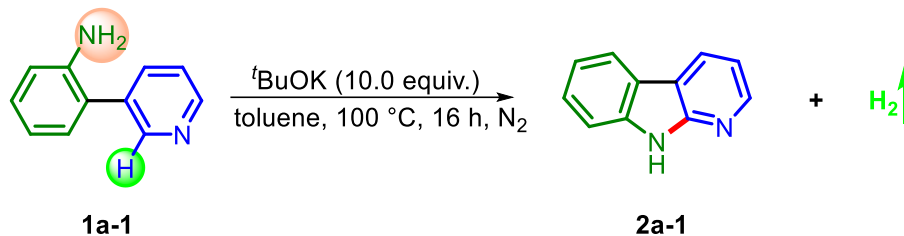

| Entry | Volume (ml) | Yield (%) <sup>b</sup> | Conv. (%) <sup>b</sup> |
|-------|-------------|------------------------|------------------------|
| 1     | 4           | 96                     | 100                    |
| 2     | 6           | 96                     | 100                    |
| 3     | 8           | 96                     | 100                    |
| 4     | 10          | 96                     | 100                    |

<sup>a</sup> Reaction conditions: **1a-1** (68.0 mg, 0.4 mmol), <sup>t</sup>BuOK (456.0 mg, 10.0 equiv.), toluene (X mL), 100 °C, N<sub>2</sub> (1.0 atm), 16 h; <sup>b</sup> Isolated yield.

**Table S7.** Screening of reaction atmosphere <sup>a</sup>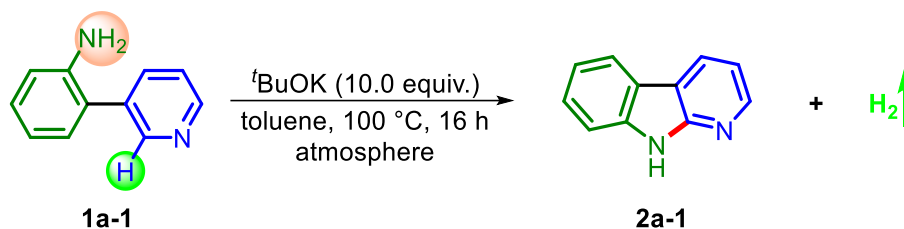

| Entry | Atmosphere                  | Yield (%) <sup>b</sup> | Conv. (%) <sup>b</sup> |
|-------|-----------------------------|------------------------|------------------------|
| 1     | Air <sup>c</sup>            | 50                     | 100                    |
| 2     | N <sub>2</sub>              | 96                     | 100                    |
| 3     | O <sub>2</sub> <sup>d</sup> | trace                  | 100                    |

<sup>a</sup> Reaction conditions: **1a-1** (68.0 mg, 0.4 mmol),  $t\text{BuOK}$  (456.0 mg, 10.0 equiv.), toluene (4 mL), 100 °C, N<sub>2</sub> (1.0 atm), 16 h; <sup>b</sup> Isolated yield; <sup>c</sup> Air; <sup>d</sup> O<sub>2</sub> (1.0 atm).

**Table S8.** Screening of the relationship between base equivalent and time <sup>a</sup>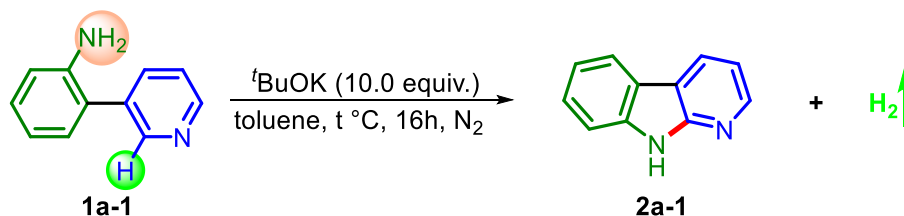

| Entry | $t\text{BuOK}$ (X equiv.) | Time (h) | Yield (%) <sup>b</sup> | Conv. (%) <sup>b</sup> |
|-------|---------------------------|----------|------------------------|------------------------|
| 1     | 2                         | 72       | 55                     | 60                     |
| 2     | 4                         | 72       | 90                     | 95                     |
| 3     | 6                         | 72       | 96                     | 100                    |
| 4     | 8                         | 72       | 96                     | 100                    |
| 5     | 2 <sup>c</sup>            | 144      | 96                     | 100                    |

<sup>a</sup> Reaction conditions: **1a-1** (68.0 mg, 0.4 mmol),  $t\text{BuOK}$  (X equiv.), toluene (4 mL), 100 °C, N<sub>2</sub> (1.0 atm), 72 h; <sup>b</sup> Isolated yield; <sup>c</sup>  $t\text{BuOK}$  (2.0 equiv.), 144 h.





## 4. Intramolecular C(sp<sup>2</sup>)-H Amination of Azines

**4.1 General procedure A:** for the synthesis of C(sp<sup>2</sup>)-H amination of azines product **2a** and **2b**

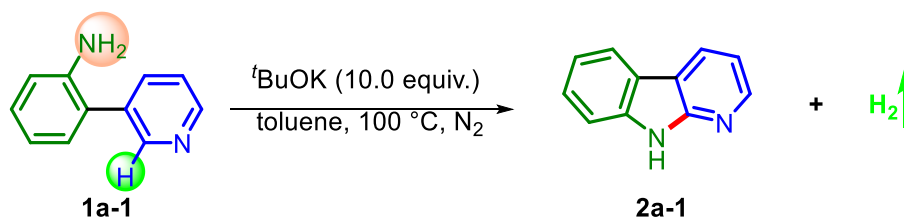

A clean, oven-dried Schlenk tube with previously placed magnetic stir-bar was charged with 2-(pyridin-3-yl)aniline (34.0 mg, 0.2 mmol) and tBuOK (224 mg, 10 equiv.). The reaction was evacuated and back filled with nitrogen and this sequence was repeated for three additional times. Under the positive flow of nitrogen, dry toluene (2.0 mL) was added to the reaction mixture. The reaction mixture was vigorously stirred at 100 °C for 16 h. Next, the reaction was allowed to cool at room temperature and the reaction mixture was extracted with ethyl acetate (3×50 mL) and brine solution (3×25 mL). The organic layer was collected and dried over anhydrous Na<sub>2</sub>SO<sub>4</sub>. The solvent was evaporated under reduced pressure and chromatographic separation with silica gel to give the desired **2a-1** as a white solid.

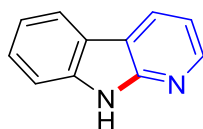

### 9H-pyrido[2,3-*b*]indole (**2a-1**)<sup>[13]</sup>

Prepared according to general procedure A to afford **2a-1** (32.2 mg, 96% yield) as a white solid. <sup>1</sup>H NMR (400 MHz, DMSO-*d*<sub>6</sub>): δ 11.82 (s, 1H), 8.47 (dt, *J* = 7.7, 1.6 Hz, 1H), 8.43 (dt, *J* = 4.8, 1.6 Hz, 1H), 8.14 (d, *J* = 7.8 Hz, 1H), 7.53 (d, *J* = 8.5 Hz, 1H), 7.49-7.43 (m, 1H), 7.24-7.16 (m, 2H). <sup>13</sup>C NMR (100 MHz, DMSO-*d*<sub>6</sub>): δ 152.4, 146.5, 139.3, 128.8, 127.0, 121.5, 120.8, 119.8, 115.6, 115.4, 111.7. HRMS (ESI) *m/z* calcd for C<sub>11</sub>H<sub>8</sub>N<sub>2</sub> [M+H]<sup>+</sup>: 169.0761, Found: 169.0770.

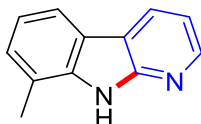

### 8-methyl-9H-pyrido[2,3-*b*]indole (**2a-2**)

Prepared according to general procedure A to afford **2a-2** (35.8 mg, 98% yield) as a white solid, (m.p. 234-236 °C). <sup>1</sup>H NMR (400 MHz, DMSO-*d*<sub>6</sub>): δ 11.79 (s, 1H), 8.50-8.39 (m, 2H), 7.96 (d, *J* = 7.8 Hz, 1H), 7.25 (d, *J* = 7.2 Hz, 1H), 7.18 (dd, *J* = 7.7, 4.9 Hz, 1H), 7.12 (t, *J* = 7.5 Hz, 1H), 2.56 (s, 3H). <sup>13</sup>C NMR (100 MHz, DMSO-*d*<sub>6</sub>): δ 152.6, 146.3, 138.5, 128.8, 127.5, 121.1, 120.4, 119.9, 118.9, 116.0, 115.4, 17.5. HRMS (ESI) *m/z* calcd for C<sub>12</sub>H<sub>10</sub>N<sub>2</sub> [M+H]<sup>+</sup>: 183.0917, Found: 183.0920.

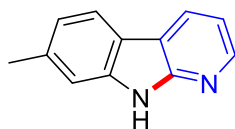

### 7-methyl-9H-pyrido[2,3-*b*]indole (**2a-3**)<sup>[13]</sup>

Prepared according to general procedure A to afford **2a-3** (27.8 mg, 76% yield) as a white solid. <sup>1</sup>H NMR (400 MHz, DMSO-*d*<sub>6</sub>): δ 11.68 (s, 1H), 8.42-8.35 (m, 2H), 8.00 (d, *J* = 7.9 Hz, 1H), 7.31 (s, 1H), 7.15 (dd, *J* = 7.6, 4.9 Hz, 1H), 7.03 (d, *J* = 8.0 Hz, 1H), 2.47 (s, 3H). <sup>13</sup>C NMR (100 MHz, DMSO-*d*<sub>6</sub>): δ 152.4, 145.8, 139.7, 136.7, 128.2, 121.3, 121.3, 118.5, 115.8, 115.2, 111.6, 22.2. HRMS (ESI) *m/z* calcd for C<sub>12</sub>H<sub>10</sub>N<sub>2</sub> [M+H]<sup>+</sup>: 183.0917, Found: 183.0920.

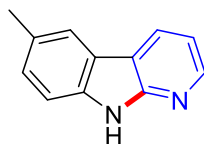

### 6-methyl-9H-pyrido[2,3-*b*]indole (**2a-4**)<sup>[13]</sup>

Prepared according to general procedure A to afford **2a-4** (32.2 mg, 87% yield) as a white solid. <sup>1</sup>H NMR (400 MHz, DMSO-*d*<sub>6</sub>): δ 11.66 (s, 1H), 8.46-8.36 (m, 2H), 7.92

(s, 1H), 7.40 (d,  $J = 8.2$  Hz, 1H), 7.26 (dd,  $J = 8.3, 1.6$  Hz, 1H), 7.15 (dd,  $J = 7.7, 4.9$  Hz, 1H), 2.45 (s, 3H).  $^{13}\text{C}$  NMR (100 MHz, DMSO- $d_6$ ):  $\delta$  152.6, 146.3, 137.4, 128.6, 128.5, 128.3, 121.3, 120.9, 115.5, 115.1, 111.4, 21.5. HRMS (ESI)  $m/z$  calcd for  $\text{C}_{12}\text{H}_{10}\text{N}_2$   $[\text{M}+\text{H}]^+$ : 183.0917, Found: 183.0920.

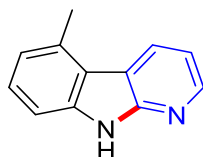

### 5-methyl-9H-pyrido[2,3-*b*]indole (**2a-5**)<sup>[13]</sup>

Prepared according to general procedure A to afford **2a-5** (32.1 mg, 87% yield) as a white solid.  $^1\text{H}$  NMR (400 MHz, DMSO- $d_6$ ):  $\delta$  11.82 (s, 1H), 8.42 (td,  $J = 6.1, 5.1, 2.7$  Hz, 2H), 7.38-7.32 (m, 2H), 7.20 (ddd,  $J = 7.0, 4.9, 1.9$  Hz, 1H), 7.01 (t,  $J = 2.7$  Hz, 1H), 2.77 (s, 3H).  $^{13}\text{C}$  NMR (100 MHz, DMSO- $d_6$ ):  $\delta$  152.1, 145.7, 139.2, 133.7, 130.3, 126.9, 121.1, 119.4, 116.0, 115.3, 109.2, 20.5. HRMS (ESI)  $m/z$  calcd for  $\text{C}_{12}\text{H}_{10}\text{N}_2$   $[\text{M}+\text{H}]^+$ : 183.0917, Found: 183.0915.

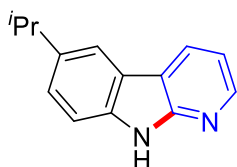

### 6-isopropyl-9H-pyrido[2,3-*b*]indole (**2a-6**)

Prepared according to general procedure A to afford **2a-6** (29.4 mg, 70% yield) as a white solid, (m.p. 139-141 °C).  $^1\text{H}$  NMR (400 MHz, DMSO- $d_6$ ):  $\delta$  11.65 (s, 1H), 8.47 (d,  $J = 7.6$  Hz, 1H), 8.38 (d,  $J = 4.7$  Hz, 1H), 8.00 (s, 1H), 7.47-7.29 (m, 2H), 7.16 (dd,  $J = 7.6, 4.9$  Hz, 1H), 3.03 (hept,  $J = 6.9$  Hz, 1H), 1.29 (d,  $J = 6.8$  Hz, 6H).  $^{13}\text{C}$  NMR (100 MHz, DMSO- $d_6$ ):  $\delta$  152.6, 146.2, 140.0, 137.7, 128.5, 125.9, 120.8, 118.6, 115.7, 115.1, 111.4, 34.0, 25.0. HRMS (ESI)  $m/z$  calcd for  $\text{C}_{14}\text{H}_{14}\text{N}_2$   $[\text{M}+\text{H}]^+$ : 211.1230, Found: 211.1234.

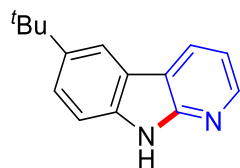

### 6-(*tert*-butyl)-9*H*-pyrido[2,3-*b*]indole (**2a-7**)

Prepared according to general procedure A to afford **2a-7** (34.0 mg, 76% yield) as a white solid, (m.p. 185-187 °C). <sup>1</sup>H NMR (400 MHz, DMSO-*d*<sub>6</sub>): δ 11.67 (s, 1H), 8.51 (d, *J* = 7.7 Hz, 1H), 8.38 (d, *J* = 4.8 Hz, 1H), 8.16 (s, 1H), 7.52 (d, *J* = 8.6 Hz, 1H), 7.42 (d, *J* = 7.8 Hz, 1H), 7.19-7.14 (m, 1H), 1.38 (s, 9H). <sup>13</sup>C NMR (100 MHz, DMSO-*d*<sub>6</sub>): δ 152.6, 146.1, 142.3, 137.3, 128.6, 124.9, 120.5, 117.5, 115.9, 115.1, 111.1, 34.9, 32.2. HRMS (ESI) *m/z* calcd for C<sub>15</sub>H<sub>16</sub>N<sub>2</sub> [M+H]<sup>+</sup>: 225.1386, Found: 225.1393.

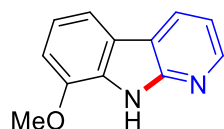

### 8-methoxy-9*H*-pyrido[2,3-*b*]indole (**2a-8**)<sup>[14]</sup>

Prepared according to general procedure A to afford **2a-8** (36.6 mg, 92% yield) as a white solid. <sup>1</sup>H NMR (400 MHz, DMSO-*d*<sub>6</sub>): δ 11.94 (s, 1H), 8.44 (dd, *J* = 13.0, 6.2 Hz, 2H), 7.73 (d, *J* = 7.8 Hz, 1H), 7.21-7.12 (m, 2H), 7.04 (d, *J* = 7.9 Hz, 1H), 3.97 (s, 3H). <sup>13</sup>C NMR (100 MHz, DMSO-*d*<sub>6</sub>): δ 152.2, 146.4, 146.2, 129.2, 128.9, 121.9, 120.4, 115.8, 115.4, 113.8, 107.8, 56.0. HRMS (ESI) *m/z* calcd for C<sub>12</sub>H<sub>10</sub>N<sub>2</sub>O [M+H]<sup>+</sup>: 199.0866, Found: 199.0866.

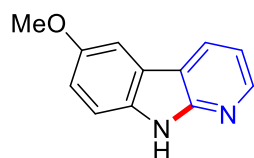

### 6-methoxy-9*H*-pyrido[2,3-*b*]indole (**2a-9**)<sup>[13]</sup>

Prepared according to general procedure A to afford **2a-9** (35.0 mg, 88% yield) as a yellow solid.  $^1\text{H}$  NMR (400 MHz,  $\text{DMSO-}d_6$ ):  $\delta$  11.64 (s, 1H), 8.47 (dd,  $J = 7.7, 1.6$  Hz, 1H), 8.39 (dd,  $J = 4.9, 1.6$  Hz, 1H), 7.75 (d,  $J = 2.5$  Hz, 1H), 7.42 (d,  $J = 8.7$  Hz, 1H), 7.15 (dd,  $J = 7.7, 4.8$  Hz, 1H), 7.09 (dd,  $J = 8.8, 2.6$  Hz, 1H), 3.84 (s, 3H).  $^{13}\text{C}$  NMR (100 MHz,  $\text{DMSO-}d_6$ ):  $\delta$  153.9, 152.7, 146.4, 133.8, 128.9, 121.2, 116.2, 115.7, 114.9, 112.4, 104.3, 56.0. HRMS (ESI)  $m/z$  calcd for  $\text{C}_{12}\text{H}_{10}\text{N}_2\text{O}$   $[\text{M}+\text{H}]^+$ : 199.0866, Found: 199.0866.

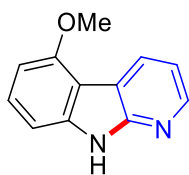

#### 5-methoxy-9H-pyrido[2,3-b]indole (**2a-10**)<sup>[13]</sup>

Prepared according to general procedure A to afford **2a-10** (35.8 mg, 90% yield) as a white solid.  $^1\text{H}$  NMR (400 MHz,  $\text{DMSO-}d_6$ ):  $\delta$  11.82 (s, 1H), 8.42-8.35 (m, 2H), 7.39 (t,  $J = 8.0$  Hz, 1H), 7.18 (dd,  $J = 7.6, 4.9$  Hz, 1H), 7.12 (d,  $J = 8.0$  Hz, 1H), 6.76 (d,  $J = 8.0$  Hz, 1H), 4.01 (s, 3H).  $^{13}\text{C}$  NMR (100 MHz,  $\text{DMSO-}d_6$ ):  $\delta$  156.4, 151.6, 145.4, 140.5, 130.0, 128.1, 115.6, 114.8, 109.7, 104.6, 101.1, 55.8. HRMS (ESI)  $m/z$  calcd for  $\text{C}_{12}\text{H}_{10}\text{N}_2\text{O}$   $[\text{M}+\text{H}]^+$ : 199.0866, Found: 199.0867.

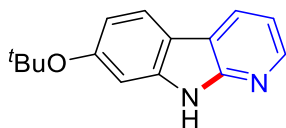

#### 7-(tert-butoxy)-9H-pyrido[2,3-b]indole (**2a-11**)

Prepared according to general procedure A to afford **2a-11** (43.0 mg, 90% yield) as a white solid, (m.p. 194-196 °C).  $^1\text{H}$  NMR (400 MHz,  $\text{DMSO-}d_6$ ):  $\delta$  11.62 (s, 1H), 8.39 (dd,  $J = 7.7, 1.6$  Hz, 1H), 8.34 (dd,  $J = 4.9, 1.5$  Hz, 1H), 8.02 (d,  $J = 8.4$  Hz, 1H), 7.16 (dd,  $J = 7.7, 4.9$  Hz, 1H), 7.05 (d,  $J = 2.0$  Hz, 1H), 6.85 (dd,  $J = 8.5, 2.0$  Hz, 1H), 1.35

(s, 9H).  $^{13}\text{C}$  NMR (100 MHz,  $\text{DMSO-}d_6$ ):  $\delta$  154.8, 152.6, 145.5, 140.0, 128.0, 121.7, 117.1, 116.6, 115.7, 115.4, 106.3, 78.8, 29.1. HRMS (m/z): calcd for  $\text{C}_{15}\text{H}_{16}\text{N}_2\text{O}$   $[\text{M}+\text{H}]^+$ : 241.1335, Found: 241.1340.

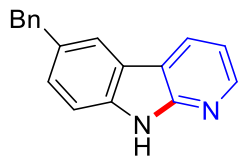

### 6-benzyl-9H-pyrido[2,3-b]indole (2a-12)

Prepared according to general procedure A to afford **2a-12** (43.0 mg, 83% yield) as a faint yellow solid, (m.p. 191-193 °C).  $^1\text{H}$  NMR (400 MHz,  $\text{DMSO-}d_6$ ):  $\delta$  11.72 (s, 1H), 8.47-8.37 (m, 2H), 8.02 (s, 1H), 7.44 (d,  $J = 8.2$  Hz, 1H), 7.36-7.23 (m, 5H), 7.20-7.10 (m, 2H), 4.08 (s, 2H).  $^{13}\text{C}$  NMR (100 MHz,  $\text{DMSO-}d_6$ ):  $\delta$  152.6, 146.4, 142.6, 137.8, 132.8, 129.0, 128.8, 128.7, 128.1, 126.2, 121.3, 121.0, 115.5, 115.2, 111.6, 41.7. HRMS (ESI) m/z calcd for  $\text{C}_{18}\text{H}_{14}\text{N}_2$   $[\text{M}+\text{H}]^+$ : 259.1230, Found: 259.1232.

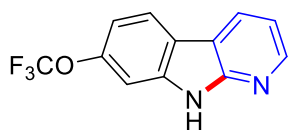

### 7-(trifluoromethoxy)-9H-pyrido[2,3-b]indole (2a-13)

Prepared according to general procedure A to afford **2a-13** (29.3 mg, 58% yield) as a white solid, (m.p. 187-189 °C).  $^1\text{H}$  NMR (400 MHz,  $\text{DMSO-}d_6$ ):  $\delta$  12.07 (s, 1H), 8.55 (dd,  $J = 7.8, 1.6$  Hz, 1H), 8.46 (dd,  $J = 4.8, 1.6$  Hz, 1H), 8.27 (d,  $J = 8.5$  Hz, 1H), 7.42 (s, 1H), 7.25 (dd,  $J = 7.7, 4.8$  Hz, 1H), 7.20 (d,  $J = 8.2$  Hz, 1H).  $^{13}\text{C}$  NMR (100 MHz,  $\text{DMSO-}d_6$ )  $\delta$  152.9, 147.4(q,  $J = 1.9$  Hz), 139.5, 129.3, 123.1, 122.0, 119.9, 119.4, 116.0, 114.9, 113.0, 104.2. HRMS (m/z): calcd for  $\text{C}_{12}\text{H}_7\text{F}_3\text{N}_2\text{O}$   $[\text{M}+\text{H}]^+$ : 253.0583, Found: 253.0584.

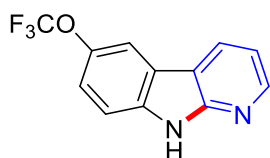

### 6-(trifluoromethoxy)-9H-pyrido[2,3-b]indole (**2a-14**)<sup>[15]</sup>

Prepared according to general procedure A to afford **2a-14** (26.1 mg, 51% yield) as a white solid. <sup>1</sup>H NMR (400 MHz, DMSO-*d*<sub>6</sub>): δ 12.08 (s, 1H), 8.56 (d, *J* = 7.7 Hz, 1H), 8.46 (dd, *J* = 4.8, 1.6 Hz, 1H), 8.28 (d, *J* = 8.5 Hz, 1H), 7.42 (s, 1H), 7.25 (dd, *J* = 7.7, 4.8 Hz, 1H), 7.20 (d, *J* = 7.8 Hz, 1H). <sup>13</sup>C NMR (100 MHz, DMSO-*d*<sub>6</sub>): δ 152.9, 147.4 (q, *J* = 2.0 Hz), 147.0, 139.4, 129.4, 123.2, 122.0, 119.9, 116.0, 114.9, 113.1, 104.2. HRMS (m/z): calcd for C<sub>12</sub>H<sub>7</sub>F<sub>3</sub>N<sub>2</sub>O [M+H]<sup>+</sup>: 253.0583, Found: 253.0581.

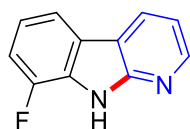

### 8-fluoro-9H-pyrido[2,3-b]indole (**2a-15**)<sup>[16]</sup>

Prepared according to general procedure A to afford **2a-15** (28.8 mg, 77% yield) as a white solid. <sup>1</sup>H NMR (400 MHz, DMSO-*d*<sub>6</sub>): δ 12.33 (s, 1H), 8.55 (d, *J* = 7.8 Hz, 1H), 8.48 (d, *J* = 4.2 Hz, 1H), 8.00 (d, *J* = 7.7 Hz, 1H), 7.32 (dd, *J* = 11.4, 8.3 Hz, 1H), 7.25 (dd, *J* = 7.7, 4.8 Hz, 1H), 7.20 (td, *J* = 7.9, 4.8 Hz, 1H). <sup>13</sup>C NMR (100 MHz, DMSO-*d*<sub>6</sub>): δ 152.5, 148.9 (d, *J* = 22.4 Hz), 147.4, 129.6, 126.9 (d, *J* = 13.1 Hz), 124.4 (d, *J* = 5.7 Hz), 120.2 (d, *J* = 5.9 Hz), 117.7 (d, *J* = 3.5 Hz), 116.0, 115.5 (d, *J* = 3.0 Hz), 112.2 (d, *J* = 16.2 Hz). HRMS (ESI) m/z calcd for C<sub>11</sub>H<sub>7</sub>FN<sub>2</sub> [M+H]<sup>+</sup>: 187.0666, Found: 187.0667.

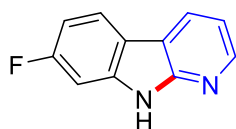



### 7-fluoro-9H-pyrido[2,3-b]indole (2a-16)<sup>[13]</sup>

Prepared according to general procedure A to afford **2a-16** (28.4 mg, 76% yield) as a white solid. <sup>1</sup>H NMR (400 MHz, DMSO-*d*<sub>6</sub>): δ 11.92 (s, 1H), 8.47 (dd, *J* = 7.7, 1.6 Hz, 1H), 8.39 (dd, *J* = 4.8, 1.7 Hz, 1H), 8.17 (dd, *J* = 8.6, 5.6 Hz, 1H), 7.25 (dd, *J* = 9.9, 2.3 Hz, 1H), 7.21 (dd, *J* = 7.7, 4.9 Hz, 1H), 7.10-7.02 (m, 1H). <sup>13</sup>C NMR (100 MHz, DMSO-*d*<sub>6</sub>): δ 163.1, 160.7, 152.8 (d, *J* = 2.0 Hz), 146.1, 140.0 (d, *J* = 13.0 Hz), 128.6, 123.2 (d, *J* = 11.0 Hz), 117.5 (d, *J* = 20.0 Hz), 115.6 (d, *J* = 47.0 Hz), 107.9 (d, *J* = 24.0 Hz), 98.2 (d, *J* = 26.0 Hz). HRMS (ESI) *m/z* calcd for C<sub>11</sub>H<sub>7</sub>FN<sub>2</sub> [M+H]<sup>+</sup>: 187.0666, Found: 187.0661.

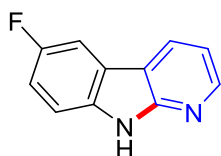

### 6-fluoro-9H-pyrido[2,3-b]indole (2a-17)<sup>[16]</sup>

Prepared according to general procedure A to afford **2a-17** (33.0 mg, 88% yield) as a white solid. <sup>1</sup>H NMR (400 MHz, DMSO-*d*<sub>6</sub>): δ 11.85 (s, 1H), 8.50 (dd, *J* = 7.7, 1.6 Hz, 1H), 8.44 (dd, *J* = 4.8, 1.6 Hz, 1H), 8.01 (dd, *J* = 9.3, 2.6 Hz, 1H), 7.50 (dd, *J* = 8.8, 4.5 Hz, 1H), 7.30 (td, *J* = 9.2, 2.6 Hz, 1H), 7.19 (dd, *J* = 7.7, 4.8 Hz, 1H). <sup>13</sup>C NMR (100 MHz, DMSO-*d*<sub>6</sub>): δ 158.3, 156.0, 153.0, 147.2, 135.6, 129.4, 121.3 (d, *J* = 10.0 Hz), 115.4 (d, *J* = 4.0 Hz), 115.3, 114.7 (d, *J* = 25.0 Hz), 112.7 (d, *J* = 9.0 Hz), 107.2 (d, *J* = 24.0 Hz). HRMS (ESI) *m/z* calcd for C<sub>11</sub>H<sub>7</sub>FN<sub>2</sub> [M+H]<sup>+</sup>: 187.0666, Found: 187.0664.

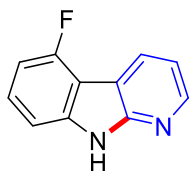

### 5-fluoro-9H-pyrido[2,3-b]indole (2a-18)<sup>[15]</sup>

Prepared according to general procedure A to afford **2a-18** (28.4 mg, 76% yield) as a white solid.  $^1\text{H}$  NMR (400 MHz,  $\text{DMSO-}d_6$ ):  $\delta$  12.17 (s, 1H), 8.46 (dd,  $J = 4.9, 1.6$  Hz, 1H), 8.36 (dd,  $J = 7.7, 1.6$  Hz, 1H), 7.44 (td,  $J = 8.0, 5.5$  Hz, 1H), 7.35 (d,  $J = 8.1$  Hz, 1H), 7.22 (dd,  $J = 7.7, 4.9$  Hz, 1H), 7.00 (dd,  $J = 10.3, 7.9$  Hz, 1H).  $^{13}\text{C}$  NMR (100 MHz,  $\text{DMSO-}d_6$ ):  $\delta$  159.6, 157.1, 151.8, 146.9, 141.4 (d,  $J = 9.0$  Hz), 130.3 (d,  $J = 2.7$  Hz), 128.0 (d,  $J = 8.4$  Hz), 116.1, 112.7 (d,  $J = 1.7$  Hz), 108.1 (d,  $J = 3.4$  Hz), 105.4 (d,  $J = 18.1$  Hz). HRMS (ESI)  $m/z$  calcd for  $\text{C}_{11}\text{H}_7\text{FN}_2$   $[\text{M}+\text{H}]^+$ : 187.0666, Found: 187.0665.

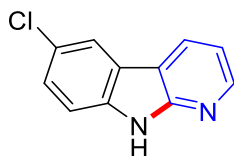

#### 6-chloro-9H-pyrido[2,3-b]indole (**2a-19**)<sup>[15]</sup>

Prepared according to general procedure A to afford **2a-19** (28.8 mg, 71% yield) as a white solid.  $^1\text{H}$  NMR (400 MHz,  $\text{DMSO-}d_6$ )  $\delta$  11.96 (s, 1H), 8.55 (d,  $J = 7.8$  Hz, 1H), 8.45 (d,  $J = 5.0$  Hz, 1H), 8.28 (s, 1H), 7.54-7.43 (m, 2H), 7.22 (ddd,  $J = 7.7, 4.9, 1.2$  Hz, 1H).  $^{13}\text{C}$  NMR (100 MHz,  $\text{DMSO-}d_6$ )  $\delta$  152.7, 147.4, 137.6, 129.6, 126.8, 124.2, 122.1, 121.2, 115.8, 114.9, 113.2. HRMS (ESI)  $m/z$  calcd for  $\text{C}_{11}\text{H}_7\text{ClN}_2$   $[\text{M}+\text{H}]^+$ : 203.0371, Found: 203.0368.

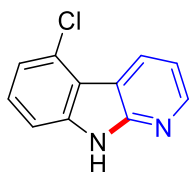

#### 5-chloro-9H-pyrido[2,3-b]indole (**2a-20**)

Prepared according to general procedure A to afford **2a-20** (28.7 mg, 71% yield) as a white solid, (m.p. 238-240 °C).  $^1\text{H}$  NMR (400 MHz,  $\text{DMSO-}d_6$ ):  $\delta$  12.18 (s, 1H), 8.67 (d,  $J = 7.5$  Hz, 1H), 8.50 (dd,  $J = 4.8, 1.7$  Hz, 1H), 7.53-7.43 (m, 2H), 7.27 (dt,  $J = 7.9, 2.5$  Hz, 2H).  $^{13}\text{C}$  NMR (100 MHz,  $\text{DMSO-}d_6$ ):  $\delta$  152.1, 147.3, 140.4, 130.4, 128.2,

127.8, 120.2, 118.0, 115.9, 114.3, 110.7. HRMS (ESI)  $m/z$  calcd for  $C_{11}H_7ClN_2$   $[M+H]^+$ : 203.0371, Found: 203.0368.

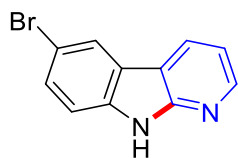

### 6-bromo-9H-pyrido[2,3-b]indole (2a-21)

Prepared according to general procedure A to afford **2a-21** (34.9 mg, 70% yield) as a white solid, (m.p. 210-212 °C).  $^1H$  NMR (400 MHz, DMSO- $d_6$ ):  $\delta$  11.96 (s, 1H), 8.55 (d,  $J = 7.7$  Hz, 1H), 8.47-8.43 (m, 1H), 8.42 (d,  $J = 2.0$  Hz, 1H), 7.57 (dd,  $J = 8.6, 2.0$  Hz, 1H), 7.47 (d,  $J = 8.6$  Hz, 1H), 7.22 (dd,  $J = 7.8, 4.8$  Hz, 1H).  $^{13}C$  NMR (100 MHz, DMSO- $d_6$ ):  $\delta$  152.4, 147.4, 137.9, 129.6, 129.4, 124.2, 122.8, 115.8, 114.7, 113.7, 111.9. HRMS (ESI)  $m/z$  calcd for  $C_{11}H_7BrN_2$   $[M+H]^+$ : 246.9865, Found: 246.9872.

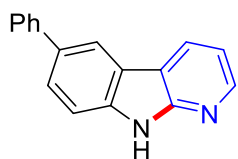

### 6-phenyl-9H-pyrido[2,3-b]indole (2a-22)

Prepared according to general procedure A to afford **2a-22** (21.1 mg, 43% yield) as a yellow solid, (m.p. 239-241 °C).  $^1H$  NMR (400 MHz, DMSO- $d_6$ ):  $\delta$  11.82 (s, 1H), 8.51-8.40 (m, 2H), 7.92 (dd,  $J = 4.3, 2.4$  Hz, 1H), 7.54 (dd,  $J = 8.6, 4.1$  Hz, 1H), 7.38-7.30 (m, 2H), 7.24-7.13 (m, 2H), 7.09-7.03 (m, 1H), 6.99-6.90 (m, 2H).  $^{13}C$  NMR (100 MHz, DMSO- $d_6$ ):  $\delta$  159.2, 152.9, 149.4, 147.0, 136.0, 131.0, 129.4, 122.7, 121.7, 120.2, 117.4, 115.5, 115.3, 112.9, 112.8. HRMS (ESI)  $m/z$  calcd for  $C_{17}H_{12}N_2$   $[M+H]^+$ : 245.1073, Found: 245.1081.

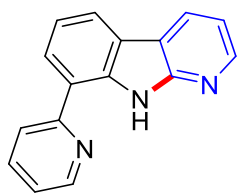

### 8-(pyridin-2-yl)-9H-pyrido[2,3-b]indole (**2a-23**)

Prepared according to general procedure A to afford **2a-23** (44.6 mg, 90% yield) as a white solid, (m.p. 226-228 °C). <sup>1</sup>H NMR (400 MHz, DMSO-*d*<sub>6</sub>): δ 11.94 (s, 1H), 8.89 (d, *J* = 1.5 Hz, 1H), 8.64 (dd, *J* = 4.8, 1.6 Hz, 1H), 8.55 (dd, *J* = 7.7, 1.6 Hz, 1H), 8.44 (dd, *J* = 4.8, 1.6 Hz, 1H), 8.23 (d, *J* = 7.6 Hz, 1H), 8.12-8.08 (m, 1H), 7.55 (ddd, *J* = 7.9, 4.8, 0.8 Hz, 1H), 7.48 (dd, *J* = 7.4, 1.2 Hz, 1H), 7.35 (t, *J* = 7.6 Hz, 1H), 7.23 (dd, *J* = 7.7, 4.8 Hz, 1H). <sup>13</sup>C NMR (100 MHz, DMSO-*d*<sub>6</sub>): δ 153.0, 149.6, 148.8, 146.9, 136.8, 136.7, 134.4, 129.0, 127.6, 124.3, 122.4, 121.9, 121.4, 120.5, 115.8, 115.7. HRMS (ESI) *m/z* calcd for C<sub>16</sub>H<sub>11</sub>N<sub>3</sub> [M+H]<sup>+</sup>: 246.1025, Found: 246.1023.

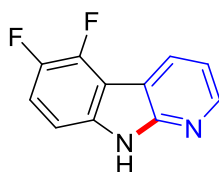

### 5,6-difluoro-9H-pyrido[2,3-b]indole (**2a-24**)

Prepared according to general procedure A to afford **2a-24** (26.6 mg, 72% yield) as a white solid, (m.p. 235-237 °C). <sup>1</sup>H NMR (400 MHz, DMSO-*d*<sub>6</sub>): δ 12.18 (s, 1H), 8.51 (d, *J* = 4.9 Hz, 1H), 8.42 (d, *J* = 7.8 Hz, 1H), 7.52 (q, *J* = 8.7 Hz, 1H), 7.33-7.25 (m, 2H). <sup>13</sup>C NMR (100 MHz, DMSO-*d*<sub>6</sub>): δ 152.4, 147.7, 146.3 (d, *J* = 14.9 Hz), 144.7, 143.8 (d, *J* = 14.8 Hz), 142.5 (d, *J* = 9.4 Hz), 136.7 (d, *J* = 8 Hz), 130.7 (d, *J* = 2.6 Hz), 116.3 (d, *J* = 18.4 Hz), 116.10, 107.8 (dd, *J* = 40.0, 31.1 Hz). HRMS (ESI) *m/z* calcd for C<sub>11</sub>H<sub>6</sub>F<sub>2</sub>N<sub>2</sub> [M+H]<sup>+</sup>: 205.0572, Found: 205.0565.

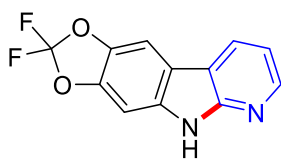

### 2,2-difluoro-5*H*-[1,3]dioxolo[4,5-*f*]pyrido[2,3-*b*]indole (2a-25)

Prepared according to general procedure A to afford **2a-25** (20.1 mg, 40% yield) as a white solid, (m.p. 241-243 °C). <sup>1</sup>H NMR (400 MHz, DMSO-*d*<sub>6</sub>): δ 12.06 (s, 1H), 8.58-8.31 (m, 2H), 8.20 (s, 1H), 7.48 (s, 1H), 7.21 (s, 1H). <sup>13</sup>C NMR (100 MHz, DMSO-*d*<sub>6</sub>): δ 152.2, 146.3, 142.5, 137.8, 135.2, 134.2, 131.7, 128.8, 115.7, 115.5, 102.8, 94.3. HRMS (ESI) *m/z* calcd for C<sub>12</sub>H<sub>6</sub>F<sub>2</sub>N<sub>2</sub>O<sub>2</sub> [M+H]<sup>+</sup>: 249.0470, Found: 249.0468.

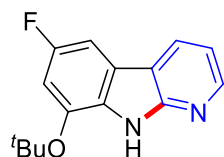

### 8-(*tert*-butoxy)-6-fluoro-9*H*-pyrido[2,3-*b*]indole (2a-26)

Prepared according to general procedure A to afford **2a-26** (30.9 mg, 60% yield) as a white solid, (m.p. 145-147 °C). <sup>1</sup>H NMR (400 MHz, DMSO-*d*<sub>6</sub>): δ 11.84 (s, 1H), 8.47 (dd, *J* = 14.2, 6.2 Hz, 2H), 7.75 (dd, *J* = 8.7, 2.4 Hz, 1H), 7.19 (dd, *J* = 7.3, 4.9 Hz, 1H), 7.01 (dd, *J* = 11.1, 2.0 Hz, 1H), 1.43 (s, 9H). <sup>13</sup>C NMR (100 MHz, DMSO-*d*<sub>6</sub>): δ 157.8, 155.5, 152.8, 147.3, 141.6 (d, *J* = 11.5 Hz), 131.2, 129.5, 121.6 (d, *J* = 11.9 Hz), 115.3, 109.1 (d, *J* = 25.7 Hz), 102.0 (d, *J* = 23.8 Hz), 81.5, 28.7. HRMS (ESI) *m/z* calcd for C<sub>15</sub>H<sub>15</sub>FN<sub>2</sub>O [M+H]<sup>+</sup>: 259.1241, Found: 259.1246.

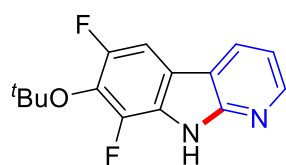

### 7-(*tert*-butoxy)-6,8-difluoro-9*H*-pyrido[2,3-*b*]indole (2a-27)

Prepared according to general procedure A to afford **2a-27** (35.3 mg, 64% yield) as a white solid, (m.p. 200-202 °C). <sup>1</sup>H NMR (400 MHz, DMSO-*d*<sub>6</sub>): δ 12.28 (s, 1H), 8.52-8.43 (m, 2H), 7.96 (d, *J* = 10.2 Hz, 1H), 7.23 (dd, *J* = 7.8, 4.8 Hz, 1H), 1.37 (s, 9H). <sup>13</sup>C NMR (100 MHz, DMSO-*d*<sub>6</sub>): δ 153.5 (d, *J* = 2.5 Hz), 153.0, 151.1 (d, *J* = 2.6 Hz), 147.2, 145.2 (d, *J* = 5.4 Hz), 142.8 (d, *J* = 5.3 Hz), 129.5, 124.4 (d, *J* = 12.5 Hz), 115.9,

103.6 (dd,  $J = 29.5, 3.7$  Hz), 103.5, 83.5, 28.5. HRMS (ESI)  $m/z$  calcd for  $C_{15}H_{14}F_2N_2O$   $[M+H]^+$ : 277.1147, Found: 277.1151.

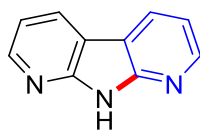

### **9H-pyrrolo[2,3-*b*:5,4-*b'*]dipyridine (2a-28)<sup>[13]</sup>**

Prepared according to general procedure A to afford **2a-28** (12.9 mg, 38% yield) as a white solid.  $^1H$  NMR (400 MHz, DMSO- $d_6$ ):  $\delta$  12.38 (s, 1H), 8.56 (dd,  $J = 7.8, 1.6$  Hz, 2H), 8.48 (dd,  $J = 4.9, 1.6$  Hz, 2H), 7.28 (dd,  $J = 7.7, 4.9$  Hz, 2H).  $^{13}C$  NMR (100 MHz, DMSO- $d_6$ ):  $\delta$  151.7, 147.4, 129.9, 116.3, 114.0. HRMS (ESI)  $m/z$  calcd for  $C_{10}H_7N_3$   $[M+H]^+$ : 170.0713, Found: 170.0714.

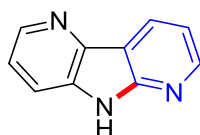

### **5H-pyrrolo[2,3-*b*:4,5-*b'*]dipyridine (2a-29)<sup>[13]</sup>**

Prepared according to general procedure A to afford **2a-29** (15.3 mg, 45% yield) as a faint yellow solid.  $^1H$  NMR (400 MHz, DMSO- $d_6$ ):  $\delta$  12.38 (s, 1H), 8.56 (dd,  $J = 7.8, 1.6$  Hz, 2H), 8.48 (dd,  $J = 4.9, 1.6$  Hz, 2H), 7.28 (dd,  $J = 7.7, 4.9$  Hz, 2H).  $^{13}C$  NMR (100 MHz, DMSO- $d_6$ ):  $\delta$  152.5, 148.6, 142.6, 139.5, 132.9, 129.1, 121.7, 119.0, 116.3, 114.7. HRMS (ESI)  $m/z$  calcd for  $C_{10}H_7N_3$   $[M+H]^+$ : 170.0713, Found: 170.0713.

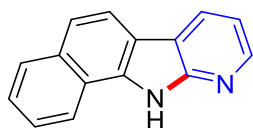

### **11H-benzo[*g*]pyrido[2,3-*b*]indole (2a-30)<sup>[17]</sup>**

Prepared according to general procedure A to afford **2a-30** (39.4 mg, 90% yield) as a white solid.  $^1H$  NMR (400 MHz, DMSO- $d_6$ ):  $\delta$  12.79 (s, 1H), 8.63 (d,  $J = 8.2$  Hz, 1H),

8.56 (d,  $J = 7.7$  Hz, 1H), 8.48 (dd,  $J = 4.8, 1.6$  Hz, 1H), 8.23 (d,  $J = 8.5$  Hz, 1H), 8.04 (d,  $J = 8.3$  Hz, 1H), 7.72-7.62 (m, 2H), 7.58 (ddd,  $J = 8.3, 6.9, 1.4$  Hz, 1H), 7.27 (ddd,  $J = 7.7, 4.7, 1.5$  Hz, 1H).  $^{13}\text{C}$  NMR (100 MHz, DMSO- $d_6$ ):  $\delta$  151.6, 145.7, 135.1, 132.6, 129.0, 128.4, 126.2, 126.2, 122.8, 121.6, 120.4, 120.2, 116.3, 116.0, 115.7. HRMS (ESI)  $m/z$  calcd for  $\text{C}_{15}\text{H}_{10}\text{N}_2$   $[\text{M}+\text{H}]^+$ : 219.0917, Found: 219.0914.

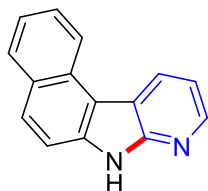

### 7H-benzo[e]pyrido[2,3-b]indole (2a-31)<sup>[13]</sup>

Prepared according to general procedure A to afford **2a-31** (38.1 mg, 87% yield) as a white solid.  $^1\text{H}$  NMR (400 MHz, DMSO- $d_6$ ):  $\delta$  12.79 (s, 1H), 8.63 (d,  $J = 8.2$  Hz, 1H), 8.56 (d,  $J = 7.7$  Hz, 1H), 8.48 (dd,  $J = 4.8, 1.6$  Hz, 1H), 8.23 (d,  $J = 8.5$  Hz, 1H), 8.04 (d,  $J = 8.3$  Hz, 1H), 7.72-7.62 (m, 2H), 7.58 (ddd,  $J = 8.3, 6.9, 1.4$  Hz, 1H), 7.27 (ddd,  $J = 7.7, 4.7, 1.5$  Hz, 1H).  $^{13}\text{C}$  NMR (100 MHz, DMSO- $d_6$ ):  $\delta$  151.6, 145.7, 135.1, 132.6, 129.0, 128.4, 126.2, 126.2, 122.8, 121.6, 120.4, 120.2, 116.3, 116.0, 115.7. HRMS (ESI)  $m/z$  calcd for  $\text{C}_{15}\text{H}_{10}\text{N}_2$   $[\text{M}+\text{H}]^+$ : 219.0916, Found: 219.0919.

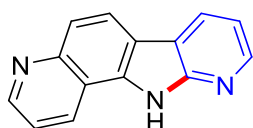

### 11H-pyrido[3',2':4,5]pyrrolo[2,3-f]quinoline (2a-32)

Prepared according to general procedure A to afford **2a-32** (30.8 mg, 70% yield) as a white solid, (m.p.  $>320$  °C).  $^1\text{H}$  NMR (400 MHz, DMSO- $d_6$ ):  $\delta$  12.98 (s, 1H), 9.02 (ddd,  $J = 8.4, 1.7, 0.8$  Hz, 1H), 8.95 (dd,  $J = 4.3, 1.7$  Hz, 1H), 8.64 (dd,  $J = 7.7, 1.6$  Hz, 1H), 8.53-8.47 (m, 2H), 7.82 (d,  $J = 8.8$  Hz, 1H), 7.67 (dd,  $J = 8.3, 4.3$  Hz, 1H), 7.33 (dd,  $J = 7.8, 4.8$  Hz, 1H).  $^{13}\text{C}$  NMR (100 MHz, DMSO- $d_6$ ):  $\delta$  151.8, 150.0, 147.8, 146.2, 134.5,

130.9, 128.9, 123.7, 121.5, 121.3, 116.8, 116.4, 115.9, 115.8. HRMS (ESI)  $m/z$  calcd for  $C_{14}H_9N_3$   $[M+H]^+$ : 220.0869, Found: 220.0868.

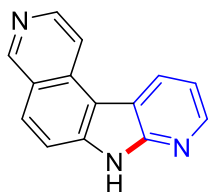

### 7H-pyrido[3',2':4,5]pyrrolo[3,2-f]isoquinoline (2a-33)

Prepared according to general procedure A to afford **2a-33** (34.2 mg, 78% yield) as a white solid, (m.p.  $>320$  °C).  $^1H$  NMR (400 MHz, DMSO- $d_6$ ):  $\delta$  12.60 (s, 1H), 9.37 (s, 1H), 9.01 (d,  $J = 7.9$  Hz, 1H), 8.66 (d,  $J = 5.7$  Hz, 1H), 8.56 (dd,  $J = 18.5, 5.3$  Hz, 2H), 8.16 (d,  $J = 8.8$  Hz, 1H), 7.89 (d,  $J = 8.8$  Hz, 1H), 7.40 (dd,  $J = 7.8, 4.7$  Hz, 1H).  $^{13}C$  NMR (100 MHz, DMSO- $d_6$ ):  $\delta$  152.9, 151.1, 145.9, 144.8, 139.6, 132.5, 130.2, 127.7, 124.3, 116.9, 116.8, 115.8, 115.2, 111.4. HRMS (ESI)  $m/z$  calcd for  $C_{14}H_9N_3$   $[M+H]^+$ : 220.0869, Found: 220.0871.

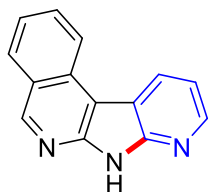

### 7H-pyrido[3',2':4,5]pyrrolo[2,3-c]isoquinoline (2a-34)

Prepared according to general procedure A to afford **2a-34** (30.8 mg, 70% yield) as a faint yellow solid, (m.p.  $>320$  °C).  $^1H$  NMR (400 MHz, DMSO- $d_6$ ):  $\delta$  12.82 (s, 1H), 9.27 (s, 1H), 8.96 (dd,  $J = 7.9, 1.5$  Hz, 1H), 8.71 (dd,  $J = 8.4, 1.1$  Hz, 1H), 8.53 (dd,  $J = 4.8, 1.5$  Hz, 1H), 8.28 (d,  $J = 7.6$  Hz, 1H), 7.93 (t,  $J = 7.6$  Hz, 1H), 7.61 (t,  $J = 7.5$  Hz, 1H), 7.38 (dd,  $J = 7.9, 4.8$  Hz, 1H).  $^{13}C$  NMR (100 MHz, DMSO- $d_6$ ):  $\delta$  152.0, 149.8, 147.8, 145.9, 132.3, 132.0, 130.6, 130.0, 124.8, 124.6, 122.9, 116.7, 114.5, 104.2. HRMS (ESI)  $m/z$  calcd for  $C_{14}H_9N_3$   $[M+H]^+$ : 220.0869, Found: 220.0875.



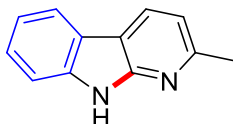

### 2-methyl-9H-pyrido[2,3-*b*]indole (**2b-1**)<sup>[13]</sup>

Prepared according to general procedure A to afford **2b-1** (18.3 mg, 50% yield) as a yellow solid. <sup>1</sup>H NMR (400 MHz, DMSO-*d*<sub>6</sub>): δ 11.64 (s, 1H), 8.35 (d, *J* = 8.1 Hz, 1H), 8.08 (d, *J* = 7.2 Hz, 1H), 7.47 (dt, *J* = 8.1, 1.0 Hz, 1H), 7.40 (ddd, *J* = 8.2, 7.1, 1.2 Hz, 1H), 7.18 (ddd, *J* = 8.0, 7.1, 1.1 Hz, 1H), 7.06 (d, *J* = 7.8 Hz, 1H), 2.58 (s, 3H). <sup>13</sup>C NMR (100 MHz, DMSO-*d*<sub>6</sub>): δ 155.3, 152.2, 138.9, 129.0, 126.3, 121.1, 121.0, 119.6, 115.0, 113.0, 111.6, 24.8. HRMS (ESI) *m/z* calcd for C<sub>12</sub>H<sub>10</sub>N<sub>2</sub> [M+H]<sup>+</sup>: 183.0917, Found: 183.0921.

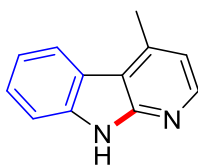

### 4-methyl-9H-pyrido[2,3-*b*]indole (**2b-2**)<sup>[18]</sup>

Prepared according to general procedure A to afford **2b-2** (30.4 mg, 83% yield) as a yellow solid. <sup>1</sup>H NMR (400 MHz, DMSO-*d*<sub>6</sub>): δ 11.83 (s, 1H), 8.28 (dd, *J* = 5.0, 1.6 Hz, 1H), 8.08 (d, *J* = 7.8 Hz, 1H), 7.53 (d, *J* = 8.1 Hz, 1H), 7.45 (t, *J* = 7.6 Hz, 1H), 7.22 (t, *J* = 7.5 Hz, 1H), 6.99 (d, *J* = 4.0 Hz, 1H), 2.77 (s, 3H). <sup>13</sup>C NMR (100 MHz, DMSO-*d*<sub>6</sub>): δ 152.2, 146.2, 142.1, 139.0, 126.4, 123.1, 121.2, 119.8, 117.2, 114.4, 111.5, 20.0. HRMS (ESI) *m/z* calcd for C<sub>12</sub>H<sub>10</sub>N<sub>2</sub> [M+H]<sup>+</sup>: 183.0917, Found: 183.0918.

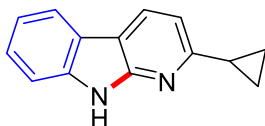

### 2-cyclopropyl-9H-pyrido[2,3-*b*]indole (**2b-3**)

Prepared according to general procedure A to afford **2b-3** (30.0 mg, 72% yield) as a white solid, (m.p. 173-175 °C). <sup>1</sup>H NMR (400 MHz, DMSO-*d*<sub>6</sub>): δ 11.63 (s, 1H), 8.29 (d, *J* = 7.8 Hz, 1H), 8.04 (d, *J* = 7.4 Hz, 1H), 7.42 (d, *J* = 7.7 Hz, 1H), 7.39-7.34 (m, 1H), 7.16 (t, *J* = 7.4 Hz, 1H), 7.11 (d, *J* = 7.9 Hz, 1H), 2.19 (tt, *J* = 7.9, 5.0 Hz, 1H), 0.99 (tt, *J* = 8.1, 2.7 Hz, 4H). <sup>13</sup>C NMR (100 MHz, DMSO-*d*<sub>6</sub>): δ 160.0, 152.6, 138.9, 128.7, 126.1, 121.1, 120.9, 119.6, 113.7, 113.1, 111.4, 17.6, 10.5. HRMS (ESI) *m/z* calcd for C<sub>14</sub>H<sub>12</sub>N<sub>2</sub> [M+H]<sup>+</sup>: 209.1073, Found: 209.1074.

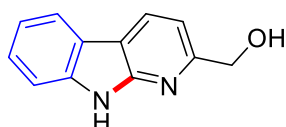

#### (9*H*-pyrido[2,3-*b*]indol-2-yl)methanol (**2b-4**)

Prepared according to general procedure A to afford **2b-4** (16.6 mg, 42% yield) as a yellow solid, (m.p. 236-238 °C). <sup>1</sup>H NMR (400 MHz, DMSO-*d*<sub>6</sub>): δ 11.64 (s, 1H), 8.46 (d, *J* = 7.9 Hz, 1H), 8.10 (d, *J* = 7.8 Hz, 1H), 7.48 (d, *J* = 8.1 Hz, 1H), 7.42 (ddd, *J* = 8.2, 7.0, 1.2 Hz, 1H), 7.33 (d, *J* = 7.9 Hz, 1H), 7.20 (ddd, *J* = 8.0, 7.1, 1.1 Hz, 1H), 5.42 (t, *J* = 5.9 Hz, 1H), 4.68 (d, *J* = 5.8 Hz, 2H). <sup>13</sup>C NMR (100 MHz, DMSO-*d*<sub>6</sub>): δ 159.4, 151.8, 139.2, 129.1, 126.6, 121.3, 120.9, 119.7, 114.2, 112.2, 111.6, 65.2. HRMS (ESI) *m/z* calcd for C<sub>12</sub>H<sub>10</sub>N<sub>2</sub>O [M+H]<sup>+</sup>: 199.0866, Found: 199.0865.

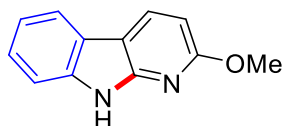

#### 2-methoxy-9*H*-pyrido[2,3-*b*]indole (**2b-5**)

Prepared according to general procedure A to afford **2b-5** (25.0 mg, 63% yield) as a faint yellow solid, (m.p. 156-158 °C). <sup>1</sup>H NMR (400 MHz, DMSO-*d*<sub>6</sub>): δ 11.75 (s, 1H), 8.35 (d, *J* = 8.3 Hz, 1H), 7.99 (d, *J* = 7.7 Hz, 1H), 7.43 (d, *J* = 8.0 Hz, 1H), 7.35-7.29 (m, 1H), 7.16 (t, *J* = 7.4 Hz, 1H), 6.62 (dd, *J* = 8.3, 0.9 Hz, 1H), 3.94 (s, 3H). <sup>13</sup>C NMR (100 MHz, DMSO-*d*<sub>6</sub>): δ 163.0, 150.7, 138.1, 132.0, 124.9, 121.5, 120.1, 119.8, 111.5,

108.9, 102.4, 53.7. HRMS (ESI)  $m/z$  calcd for  $C_{12}H_{10}N_2O$   $[M+H]^+$ : 199.0866, Found: 199.0868.

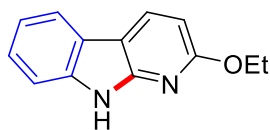

### 2-ethoxy-9H-pyrido[2,3-b]indole (**2b-6**)<sup>[18]</sup>

Prepared according to general procedure A to afford **2b-6** (26.8 mg, 63% yield) as a yellow solid.  $^1H$  NMR (400 MHz,  $DMSO-d_6$ )  $\delta$  11.71 (s, 1H), 8.33 (d,  $J = 8.4$  Hz, 1H), 7.98 (d,  $J = 7.7$  Hz, 1H), 7.43 (d,  $J = 8.5$  Hz, 1H), 7.32 (t,  $J = 7.6$  Hz, 1H), 7.16 (t,  $J = 7.5$  Hz, 1H), 6.59 (d,  $J = 8.3$  Hz, 1H), 4.39 (q,  $J = 7.0$  Hz, 2H), 1.37 (t,  $J = 7.0$  Hz, 3H).  $^{13}C$  NMR (100 MHz,  $DMSO-d_6$ )  $\delta$  162.6, 150.7, 138.1, 131.9, 124.8, 121.5, 120.1, 119.8, 111.4, 108.8, 102.6, 61.7, 15.0. HRMS (ESI)  $m/z$  calcd for  $C_{13}H_{12}N_2O$   $[M+H]^+$ : 213.1022, Found: 213.1027.

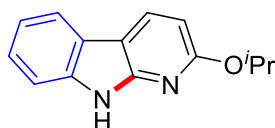

### 2-isopropoxy-9H-pyrido[2,3-b]indole (**2b-7**)

Prepared according to general procedure A to afford **2b-7** (25.0 mg, 55% yield) as a yellow solid, (m.p. 92-94 °C).  $^1H$  NMR (400 MHz,  $DMSO-d_6$ ):  $\delta$  11.71 (s, 1H), 8.33 (dd,  $J = 8.3, 4.0$  Hz, 1H), 7.98 (dd,  $J = 7.8, 4.1$  Hz, 1H), 7.40 (dd,  $J = 8.0, 4.1$  Hz, 1H), 7.34-7.26 (m, 1H), 7.20-7.10 (m, 1H), 6.54 (dd,  $J = 8.3, 3.9$  Hz, 1H), 5.38-5.27 (m, 1H), 1.35 (dd,  $J = 6.2, 3.9$  Hz, 6H).  $^{13}C$  NMR (100 MHz,  $DMSO-d_6$ ):  $\delta$  162.1, 150.7, 138.0, 132.0, 124.8, 121.5, 120.1, 119.8, 111.4, 108.62, 103.2, 67.8, 22.4. HRMS (ESI)  $m/z$  calcd for  $C_{14}H_{14}N_2O$   $[M+H]^+$ : 227.1178, Found: 227.1179.

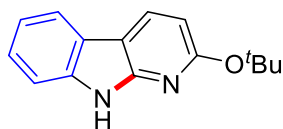

### 2-(*tert*-butoxy)-9*H*-pyrido[2,3-*b*]indole (2b-8)

Prepared according to general procedure A to afford **2b-8** (16.8 mg, 35% yield) as a yellow solid, (m.p. 133-135 °C). <sup>1</sup>H NMR (400 MHz, DMSO-*d*<sub>6</sub>): δ 11.60 (s, 1H), 8.29 (d, *J* = 8.3 Hz, 1H), 7.97 (d, *J* = 7.9 Hz, 1H), 7.41 (d, *J* = 8.4 Hz, 1H), 7.34-7.27 (m, 1H), 7.18-7.11 (m, 1H), 6.49 (d, *J* = 8.4 Hz, 1H), 1.62 (s, 9H). <sup>13</sup>C NMR (100 MHz, DMSO-*d*<sub>6</sub>): δ 167.1, 154.8, 142.8, 136.3, 129.5, 126.1, 124.8, 124.4, 116.0, 113.1, 109.8, 84.2, 33.6. HRMS (ESI) *m/z* calcd for C<sub>15</sub>H<sub>16</sub>N<sub>2</sub>O [M+H]<sup>+</sup>: 241.1335, Found: 241.1334.

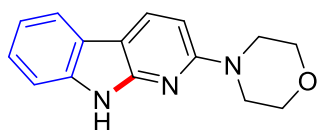

### 4-(9*H*-pyrido[2,3-*b*]indol-2-yl)morpholine (2b-9)

Prepared according to general procedure A to afford **2b-9** (22.8 mg, 45% yield) as a faint yellow solid, (m.p. 175-177 °C). <sup>1</sup>H NMR (400 MHz, DMSO-*d*<sub>6</sub>): δ 11.33 (s, 1H), 8.21 (d, *J* = 8.6 Hz, 1H), 7.89 (d, *J* = 7.7 Hz, 1H), 7.34 (d, *J* = 8.0 Hz, 1H), 7.24 (t, *J* = 7.6 Hz, 1H), 7.10 (t, *J* = 7.5 Hz, 1H), 6.69 (d, *J* = 8.6 Hz, 1H), 3.78-3.71 (m, 4H), 3.56-3.51 (m, 4H). <sup>13</sup>C NMR (100 MHz, DMSO-*d*<sub>6</sub>): δ 158.5, 151.8, 138.1, 130.7, 124.2, 121.9, 119.6, 119.5, 111.1, 106.8, 100.1, 70.2, 66.5, 46.1. HRMS (ESI) *m/z* calcd for C<sub>15</sub>H<sub>15</sub>N<sub>3</sub>O [M+H]<sup>+</sup>: 254.1288, Found: 254.1289.

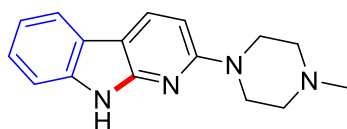

### 2-(4-methylpiperazin-1-yl)-9*H*-pyrido[2,3-*b*]indole (2b-10)

Prepared according to general procedure A to afford **2b-10** (40.4 mg, 76% yield) as a faint yellow solid, (m.p. 188-190 °C). <sup>1</sup>H NMR (400 MHz, DMSO-*d*<sub>6</sub>): δ 11.49 (s, 1H), 8.45 (dd, *J* = 7.7, 1.6 Hz, 1H), 8.36 (dd, *J* = 4.8, 1.6 Hz, 1H), 7.70 (d, *J* = 2.3 Hz, 1H), 7.38 (d, *J* = 8.8 Hz, 1H), 7.19 (dd, *J* = 8.8, 2.4 Hz, 1H), 7.13 (dd, *J* = 7.7, 4.8 Hz, 1H), 3.15 (t, *J* = 4.9 Hz, 4H), 2.54 (t, *J* = 4.9 Hz, 4H), 2.26 (s, 3H). <sup>13</sup>C NMR (100 MHz,

DMSO- $d_6$ ):  $\delta$  152.7, 146.1, 145.9, 133.8, 128.6, 121.2, 118.8, 115.9, 114.8, 112.0, 108.2, 55.3, 50.7, 46.1. HRMS (ESI)  $m/z$  calcd for  $C_{16}H_{18}N_4$   $[M+H]^+$ : 267.1604, Found: 267.1601.

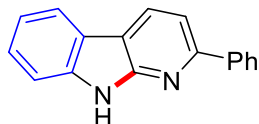

### 2-phenyl-9H-pyrido[2,3-*b*]indole (**2b-11**)<sup>[19]</sup>

Prepared according to general procedure A to afford **2b-11** (32.3 mg, 66% yield) as a faint yellow solid.  $^1H$  NMR (400 MHz, DMSO- $d_6$ ):  $\delta$  11.89 (s, 1H), 8.53 (d,  $J = 8.1$  Hz, 1H), 8.16 (dd,  $J = 12.5, 7.4$  Hz, 3H), 7.77 (d,  $J = 8.1$  Hz, 1H), 7.55-7.39 (m, 5H), 7.25-7.20 (m, 1H).  $^{13}C$  NMR (100 MHz, DMSO- $d_6$ ):  $\delta$  153.4, 152.5, 139.9, 139.8, 129.6, 129.2, 129.0, 127.1, 127.0, 121.5, 120.8, 112.0, 114.7, 112.4, 111.7. HRMS (ESI)  $m/z$  calcd for  $C_{17}H_{12}N$   $[M+H]^+$ : 245.1073, Found: 245.1075.

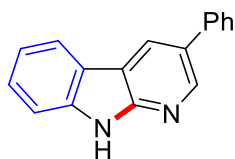

### 3-phenyl-9H-pyrido[2,3-*b*]indole (**2b-12**)<sup>[13]</sup>

Prepared according to general procedure A to afford **2b-12** (41.6 mg, 85% yield) as a faint yellow solid.  $^1H$  NMR (400 MHz, DMSO- $d_6$ ):  $\delta$  11.89 (s, 1H), 8.82 (d,  $J = 2.2$  Hz, 1H), 8.75 (d,  $J = 2.2$  Hz, 1H), 8.25 (d,  $J = 7.8$  Hz, 1H), 7.80 (d,  $J = 7.2$  Hz, 2H), 7.57-7.45 (m, 4H), 7.37 (t,  $J = 7.3$  Hz, 1H), 7.25 (ddd,  $J = 8.0, 7.0, 1.1$  Hz, 1H).  $^{13}C$  NMR (100 MHz, DMSO- $d_6$ ):  $\delta$  151.9, 145.2, 139.9, 139.1, 129.5, 128.1, 127.4, 127.3, 127.2, 127.0, 121.9, 121.0, 112.0, 115.8, 111.8. HRMS (ESI)  $m/z$  calcd for  $C_{17}H_{12}N$   $[M+H]^+$ : 245.1073, Found: 245.1076.

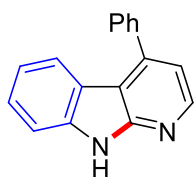

#### 4-phenyl-9H-pyrido[2,3-b]indole (2b-13)<sup>[20]</sup>

Prepared according to general procedure A to afford **2b-13** (45.5 mg, 93% yield) as a faint yellow solid. <sup>1</sup>H NMR (400 MHz, DMSO-*d*<sub>6</sub>): δ 12.03 (s, 1H), 8.45 (d, *J* = 5.0 Hz, 1H), 7.70-7.64 (m, 2H), 7.64-7.47 (m, 5H), 7.44-7.37 (m, 1H), 7.09 (d, *J* = 4.9 Hz, 1H), 7.02 (t, *J* = 7.6 Hz, 1H). <sup>13</sup>C NMR (100 MHz, DMSO-*d*<sub>6</sub>): δ 152.7, 146.5, 144.7, 139.4, 138.9, 129.3, 129.2, 128.9, 127.0, 122.3, 120.2, 119.6, 116.3, 112.5, 111.8. HRMS (ESI) *m/z* calcd for C<sub>17</sub>H<sub>12</sub>N [M+H]<sup>+</sup>: 245.1073, Found: 245.1075.

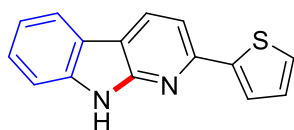

#### 2-(thiophen-2-yl)-9H-pyrido[2,3-b]indole (2b-14)

Prepared according to general procedure A to afford **2b-14** (47.5 mg, 90% yield) as a white solid, (m.p. 174-176 °C). <sup>1</sup>H NMR (400 MHz, DMSO-*d*<sub>6</sub>): δ 11.92 (s, 1H), 8.46 (d, *J* = 8.0 Hz, 1H), 8.09 (d, *J* = 7.8 Hz, 1H), 7.80 (d, *J* = 3.5 Hz, 1H), 7.72 (d, *J* = 8.1 Hz, 1H), 7.59 (d, *J* = 5.0 Hz, 1H), 7.47-7.38 (m, 2H), 7.21-7.12 (m, 2H). <sup>13</sup>C NMR (100 MHz, DMSO-*d*<sub>6</sub>): δ 152.1, 149.1, 146.0, 139.6, 129.6, 128.8, 128.2, 126.9, 125.4, 121.4, 121.0, 120.1, 114.6, 111.7, 111.1. HRMS (ESI) *m/z* calcd for C<sub>15</sub>H<sub>10</sub>N<sub>2</sub>S [M+H]<sup>+</sup>: 251.0637, Found: 251.0639.

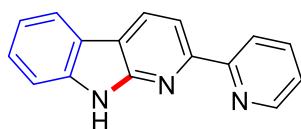

#### 2-(pyridin-2-yl)-9H-pyrido[2,3-b]indole (2b-15)

Prepared according to general procedure A to afford **2b-15** (45.6 mg, 93% yield) as a white solid, (m.p. 108-110 °C). <sup>1</sup>H NMR (400 MHz, DMSO-*d*<sub>6</sub>): δ 11.99 (s, 1H), 8.70 (ddd, *J* = 4.8, 1.9, 0.9 Hz, 1H), 8.60 (d, *J* = 8.1 Hz, 1H), 8.49 (dt, *J* = 8.0, 1.1 Hz, 1H), 8.34 (d, *J* = 8.1 Hz, 1H), 8.16 (d, *J* = 8.2 Hz, 1H), 7.95 (td, *J* = 7.7, 1.8 Hz, 1H), 7.54 (d, *J* = 8.1 Hz, 1H), 7.47 (ddd, *J* = 8.2, 7.1, 1.2 Hz, 1H), 7.41 (ddd, *J* = 7.5, 4.8, 1.2 Hz,

1H), 7.23 (ddd,  $J = 8.0, 7.1, 1.1$  Hz, 1H).  $^{13}\text{C}$  NMR (100 MHz,  $\text{DMSO-}d_6$ ):  $\delta$  160.4, 158.6, 154.5, 154.2, 151.0, 142.5, 142.4, 141.0, 135.4, 134.2, 129.2, 125.7, 127.1, 125.5, 122.1, 120.8. HRMS (ESI)  $m/z$  calcd for  $\text{C}_{16}\text{H}_{11}\text{N}_3$   $[\text{M}+\text{H}]^+$ : 246.1026, Found: 246.1029.

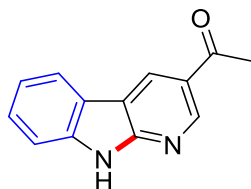

### 1-(9H-pyrido[2,3-*b*]indol-3-yl)ethan-1-one (2b-16)

Prepared according to general procedure A to afford **2b-16** (14.7 mg, 35% yield) as a white solid, (m.p. 178-180 °C).  $^1\text{H}$  NMR (400 MHz,  $\text{DMSO-}d_6$ ):  $\delta$  12.26 (s, 1H), 9.07 (dd,  $J = 15.1, 1.8$  Hz, 2H), 8.30 (d,  $J = 7.8$  Hz, 1H), 7.57-7.49 (m, 2H), 7.30 (t,  $J = 7.3$  Hz, 1H), 2.69 (s, 3H).  $^{13}\text{C}$  NMR (100 MHz,  $\text{DMSO-}d_6$ ):  $\delta$  197.0, 154.2, 148.3, 140.0, 129.2, 127.8, 125.3, 122.2, 121.2, 120.9, 115.3, 112.2, 27.3. HRMS (ESI)  $m/z$  calcd for  $\text{C}_{13}\text{H}_{10}\text{N}_2$   $[\text{M}+\text{H}]^+$ : 211.0866, Found: 211.0869.

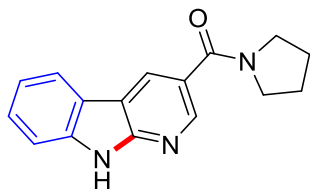

### (9H-pyrido[2,3-*b*]indol-3-yl)(pyrrolidin-1-yl)methanone (2b-17)

Prepared according to general procedure A to afford **2b-17** (24.4 mg, 46% yield) as a yellow solid, (m.p. 185-187 °C).  $^1\text{H}$  NMR (400 MHz,  $\text{DMSO-}d_6$ ):  $\delta$  12.03 (s, 1H), 8.73 (d,  $J = 2.0$  Hz, 1H), 8.61 (d,  $J = 2.1$  Hz, 1H), 8.24 (d,  $J = 7.8$  Hz, 1H), 7.55-7.45 (m, 2H), 7.25 (t,  $J = 7.4$  Hz, 1H), 3.60-3.49 (m, 4H), 1.86 (td,  $J = 12.5, 6.6$  Hz, 4H).  $^{13}\text{C}$  NMR (100 MHz,  $\text{DMSO-}d_6$ ):  $\delta$  167.8, 152.6, 146.0, 139.8, 128.2, 127.5, 124.7, 122.0, 120.9, 120.3, 114.7, 111.9, 49.7, 46.7, 26.5, 24.5. HRMS (ESI)  $m/z$  calcd for  $\text{C}_{16}\text{H}_{15}\text{N}_3\text{O}$   $[\text{M}+\text{H}]^+$ : 266.1288, Found: 266.1283.

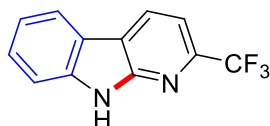

### 2-(trifluoromethyl)-9H-pyrido[2,3-b]indole (2b-18)

Prepared according to general procedure A to afford **2b-18** (35.0 mg, 74% yield) as a white solid, (m.p. 200-201 °C).  $^1\text{H}$  NMR (400 MHz, DMSO- $d_6$ ):  $\delta$  12.29 (s, 1H), 8.77 (d,  $J = 7.9$  Hz, 1H), 8.29 (d,  $J = 7.8$  Hz, 1H), 7.68 (d,  $J = 7.9$  Hz, 1H), 7.57 (d,  $J = 3.6$  Hz, 2H), 7.34-7.27 (m, 1H).  $^{13}\text{C}$  NMR (100 MHz, DMSO- $d_6$ ):  $\delta$  151.4, 142.5 (q,  $J = 33.0$  Hz), 140.6, 130.2, 128.7, 124.2, 122.6, 120.7, 119.9, 118.9, 112.1, 111.6 (q,  $J = 3.0$  Hz). HRMS (ESI)  $m/z$  calcd for  $\text{C}_{12}\text{H}_7\text{F}_3\text{N}_2$   $[\text{M}+\text{H}]^+$ : 237.0634, Found: 237.0631.

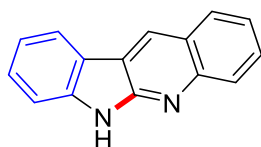

### 6H-indolo[2,3-b]quinoline (2b-19)<sup>[13]</sup>

Prepared according to general procedure A to afford **2b-19** (37.6 mg, 86% yield) as a white solid.  $^1\text{H}$  NMR (400 MHz, DMSO- $d_6$ ):  $\delta$  11.72 (s, 1H), 9.05 (s, 1H), 8.26 (d,  $J = 7.7$  Hz, 1H), 8.11 (d,  $J = 7.9$  Hz, 1H), 7.98 (d,  $J = 8.5$  Hz, 1H), 7.72 (ddd,  $J = 8.4, 6.8, 1.5$  Hz, 1H), 7.56-7.42 (m, 3H), 7.27 (t,  $J = 7.3$  Hz, 1H).  $^{13}\text{C}$  NMR (100 MHz, DMSO- $d_6$ ):  $\delta$  153.3, 146.7, 141.9, 129.1, 129.1, 128.6, 128.0, 127.4, 124.1, 123.2, 122.3, 120.7, 120.1, 118.3, 111.4. HRMS (ESI)  $m/z$  calcd for  $\text{C}_{15}\text{H}_{10}\text{N}_2$   $[\text{M}+\text{H}]^+$ : 219.0917, Found: 219.0917.

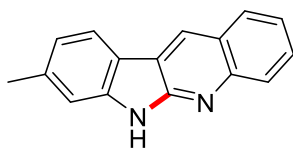

### 8-methyl-6H-indolo[2,3-b]quinoline (2b-20)



Prepared according to general procedure A to afford **2b-20** (35.8 mg, 77% yield) as a white solid, (m.p. 226-228 °C). <sup>1</sup>H NMR (400 MHz, DMSO-*d*<sub>6</sub>): δ 11.61 (s, 1H), 8.95 (s, 1H), 8.14-8.05 (m, 2H), 7.97 (d, *J* = 8.5 Hz, 1H), 7.70 (ddd, *J* = 8.4, 6.8, 1.5 Hz, 1H), 7.47 (ddd, *J* = 8.0, 6.8, 1.2 Hz, 1H), 7.30 (s, 1H), 7.12-7.06 (m, 1H), 2.51 (s, 3H). <sup>13</sup>C NMR (100 MHz, DMSO-*d*<sub>6</sub>): δ 153.6, 146.5, 142.3, 138.6, 129.0, 128.8, 127.4, 127.2, 124.2, 123.1, 122.0, 121.4, 118.5, 118.3, 111.5, 22.3. HRMS (ESI) *m/z* calcd for C<sub>16</sub>H<sub>12</sub>N<sub>2</sub> [M+H]<sup>+</sup>: 233.1073, Found: 233.1071.

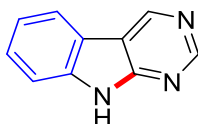

### 9H-pyrimido[4,5-*b*]indole (**2b-21**)<sup>[21]</sup>

Prepared according to general procedure A to afford **2b-21** (25.5 mg, 75% yield) as a white solid. <sup>1</sup>H NMR (400 MHz, DMSO-*d*<sub>6</sub>): δ 12.31 (s, 1H), 9.44 (s, 1H), 8.93 (s, 1H), 8.23 (d, *J* = 7.8 Hz, 1H), 7.64-7.47 (m, 2H), 7.32 (t, *J* = 7.2 Hz, 1H). <sup>13</sup>C NMR (100 MHz, DMSO-*d*<sub>6</sub>): δ 155.5, 154.9, 149.0, 138.8, 128.1, 122.1, 121.4, 119.2, 114.3, 112.3. HRMS (ESI) *m/z* calcd for C<sub>10</sub>H<sub>7</sub>N<sub>3</sub> [M+H]<sup>+</sup>: 170.0713, Found: 170.0714.

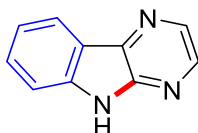

### 5H-pyrazino[2,3-*b*]indole (**2b-22**)<sup>[22]</sup>

Prepared according to general procedure A to afford **2b-22** (28.5 mg, 84% yield) as a faint yellow solid. <sup>1</sup>H NMR (400 MHz, DMSO-*d*<sub>6</sub>): δ 12.15 (s, 1H), 8.46 (dd, *J* = 21.2, 2.6 Hz, 2H), 8.23 (d, *J* = 7.7 Hz, 1H), 7.59 (d, *J* = 3.6 Hz, 2H), 7.32 (dt, *J* = 8.1, 4.1 Hz, 1H). <sup>13</sup>C NMR (100 MHz, DMSO-*d*<sub>6</sub>): δ 145.9, 140.7, 140.3, 136.9, 135.6, 129.4, 121.4, 120.9, 119.7, 112.5. HRMS (ESI) *m/z* calcd for C<sub>10</sub>H<sub>7</sub>N<sub>3</sub> [M+H]<sup>+</sup>: 170.0713, Found: 170.0713.

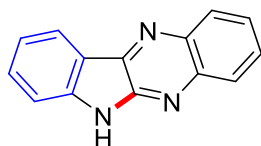

### 6H-indolo[2,3-b]quinoxaline (2b-23)<sup>[6]</sup>

Prepared according to general procedure A to afford **2b-23** (38.2 mg, 87% yield) as a yellow solid. <sup>1</sup>H NMR (400 MHz, DMSO-*d*<sub>6</sub>): δ 12.07 (s, 1H), 8.30 (dd, *J* = 39.8, 7.8 Hz, 2H), 8.07 (d, *J* = 8.1 Hz, 1H), 7.83-7.48 (m, 4H), 7.36 (t, *J* = 7.4 Hz, 1H). <sup>13</sup>C NMR (100 MHz, DMSO-*d*<sub>6</sub>) δ 146.2, 144.4, 140.6, 140.2, 139.0, 131.7, 129.5, 129.2, 127.9, 126.4, 122.7, 121.1, 119.4, 112.4. HRMS (ESI) *m/z* calcd for C<sub>14</sub>H<sub>9</sub>N<sub>3</sub> [M+H]<sup>+</sup>: 220.0869, Found: 220.0871.

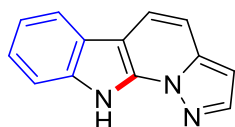

### 10H-pyrazolo[1',5':1,6]pyrido[2,3-b]indole (2b-24)

Prepared according to general procedure A to afford **2b-24** (16.6 mg, 40% yield) as a yellow solid, (m.p. 200-202 °C). <sup>1</sup>H NMR (400 MHz, DMSO-*d*<sub>6</sub>): δ 12.84 (s, 1H), 8.13 (t, *J* = 2.0 Hz, 1H), 8.05 (d, *J* = 7.8 Hz, 1H), 7.99 (dd, *J* = 9.0, 1.7 Hz, 1H), 7.58 (d, *J* = 8.0 Hz, 1H), 7.42 (dd, *J* = 9.0, 1.8 Hz, 1H), 7.34 (t, *J* = 7.7 Hz, 1H), 7.25 (t, *J* = 7.6 Hz, 1H), 6.75 (s, 1H). <sup>13</sup>C NMR (100 MHz, DMSO-*d*<sub>6</sub>): δ 142.1, 140.2, 136.0, 135.3, 124.0, 123.2, 120.9, 119.8, 119.5, 112.5, 108.4, 104.6, 98.2. HRMS (ESI) *m/z* calcd for C<sub>13</sub>H<sub>9</sub>N<sub>3</sub> [M+H]<sup>+</sup>: 208.0869, Found: 208.0873.

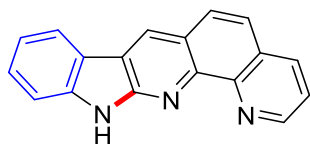

### 12H-indolo[2,3-b][1,10]phenanthroline (2b-25)<sup>[16]</sup>

Prepared according to general procedure A to afford **2b-25** (23.6 mg, 44% yield) as a yellow solid.  $^1\text{H}$  NMR (400 MHz,  $\text{DMSO-}d_6$ ):  $\delta$  12.14 (s, 1H), 9.17 (s, 1H), 9.07 (d,  $J = 2.6$  Hz, 1H), 8.47 (d,  $J = 7.6$  Hz, 1H), 8.33 (d,  $J = 7.7$  Hz, 1H), 8.11 (d,  $J = 8.8$  Hz, 1H), 7.83 (d,  $J = 8.8$  Hz, 1H), 7.73 (dd,  $J = 8.0, 4.3$  Hz, 1H), 7.62-7.53 (m, 2H), 7.31 (ddd,  $J = 8.0, 5.8, 2.4$  Hz, 1H).  $^{13}\text{C}$  NMR (100 MHz,  $\text{DMSO-}d_6$ ):  $\delta$  152.8, 149.4, 145.8, 144.2, 141.5, 136.5, 128.9, 128.6, 128.4, 128.2, 123.7, 123.2, 122.9, 122.4, 120.5, 120.3, 118.1, 111.8. HRMS (ESI)  $m/z$  calcd for  $\text{C}_{18}\text{H}_{11}\text{N}_3$   $[\text{M}+\text{H}]^+$ : 270.1025, Found: 270.1027.

## 5. Synthesis of Important Molecules and Scale-up Experiment

### 5.1 Synthesis of Norneocryptolepine (2b-19):

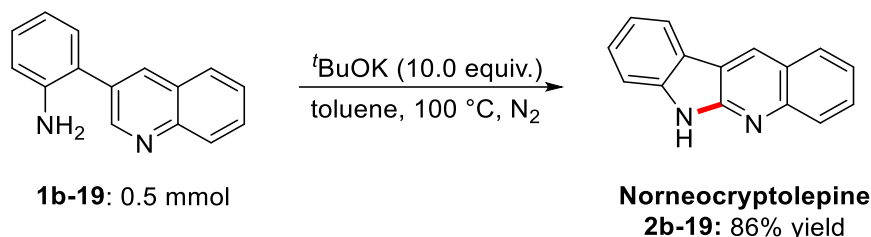

The mixture of 2-(quinolin-3-yl)aniline (110.0 mg, 0.5 mmol), <sup>t</sup>BuOK (661.0 mg, 10 equiv.) in dry solvent (5 mL) was sealed in a 25 mL Schlenk tube in glovebox. The tube was removed from the glovebox and heated at 100 °C for 16 hours. After completion (judged by TLC), toluene was removed under reduced pressure and chromatographic separation with silica gel (10% ethyl acetate in DCM as eluent) to give 95.0 mg (86%) of the desired product (**2b-19**) as a white solid.

<sup>1</sup>H NMR (400 MHz, DMSO-*d*<sub>6</sub>): δ 11.72 (s, 1H), 9.05 (s, 1H), 8.26 (d, *J* = 7.7 Hz, 1H), 8.11 (d, *J* = 7.9 Hz, 1H), 7.98 (d, *J* = 8.5 Hz, 1H), 7.72 (ddd, *J* = 8.4, 6.8, 1.5 Hz, 1H), 7.56-7.42 (m, 3H), 7.27 (t, *J* = 7.3 Hz, 1H).

<sup>13</sup>C NMR (100 MHz, DMSO-*d*<sub>6</sub>): δ 153.3, 146.7, 141.9, 129.1, 129.1, 128.6, 128.0, 127.4, 124.1, 123.2, 122.3, 120.7, 120.1, 118.3, 111.4.

HRMS (ESI) *m/z* calcd for C<sub>15</sub>H<sub>10</sub>N<sub>2</sub> [M+H]<sup>+</sup>: 219.0917, Found: 219.0917.

## 5.2 Synthesis of Neocryptolepine (3a):

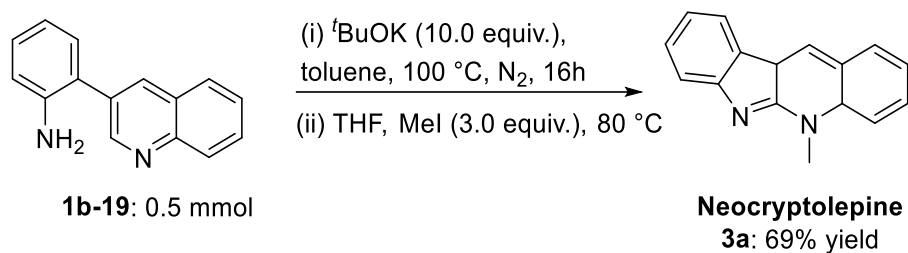

The mixture of 2-(quinolin-3-yl)aniline (110.0 mg, 0.5 mmol), <sup>t</sup>BuOK (661.0 mg, 10 equiv.) in dry solvent (5 mL) was sealed in a 25 mL Schlenk tube in glovebox. The tube was removed from the glovebox and heated at 100 °C for 16 hours. After completion (judged by TLC), toluene was removed under reduced pressure to afford the crude  $\alpha$ -carboline product. To this crude product, THF (4.0 mL) and MeI (94.0  $\mu$ L, 3.0 equiv.) was added and the microreactor was capped with a teflon pressure cap and placed into a pre-heated aluminum block at 80 °C<sup>[23]</sup>. The reaction mixture was stirred for 12 h. After completion (judged by TLC), THF was removed under reduced pressure and chromatographic separation with silica gel (10% ethyl acetate in DCM as eluent) to give 80.7 mg (69%) of the desired product (**3a**) as red solid.

<sup>1</sup>H-NMR (400 MHz, CDCl<sub>3</sub>):  $\delta$  9.38 (s, 1H), 8.32-8.19 (m, 3H), 8.02 (t,  $J$  = 7.8 Hz, 1H), 7.71 (t,  $J$  = 7.6 Hz, 1H), 7.67-7.57 (m, 2H), 7.37 (t,  $J$  = 7.4 Hz, 1H), 4.39 (s, 3H).

<sup>13</sup>C-NMR (100 MHz, CDCl<sub>3</sub>):  $\delta$  155.5, 150.6, 141.2, 138.4, 137.6, 135.7, 134.8, 129.7, 128.73, 127.2, 127.2, 127.0, 126.5, 121.3, 119.4, 40.5.

HRMS (ESI)  $m/z$  calcd for C<sub>16</sub>H<sub>12</sub>N<sub>2</sub> [M+H]<sup>+</sup>: 233.1073, Found: 233.1081

### 5.3 Synthesis of 1-(9-(3,4,5-trimethoxybenzyl)-9H-pyrido[2,3-b]indol-6-yl)ethan-1-one (3b):

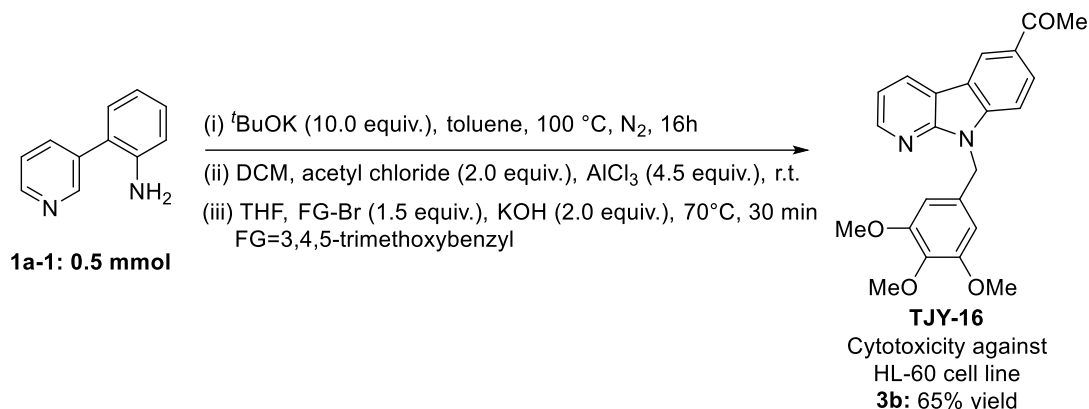

The mixture of 2-(pyridin-3-yl)aniline (84.0 mg, 0.5 mmol), <sup>t</sup>BuOK (661.0 mg, 10 equiv.) in dry solvent (5 mL) was sealed in a 25 mL Schlenk tube in glovebox. The tube was removed from the glovebox and heated at 100 °C for 16 hours. After completion (judged by TLC), the mixture was extracted with ethyl acetate (3×40 mL) and brine solution (3×20 mL). The organic layer was collected and dried over anhydrous Na<sub>2</sub>SO<sub>4</sub>. The solvent was removed under reduced pressure to afford the crude  $\alpha$ -carboline product. To this crude product, AlCl<sub>3</sub> (288.0 mg, 4.5 equiv.) and acetyl chloride (75.0 mg, 2.0 equiv.) at 25 °C were added to stirred solution of  $\alpha$ -carboline in dried CH<sub>2</sub>Cl<sub>2</sub> (10 mL)<sup>[24]</sup>. The mixture was refluxed for 4 hours and poured into iced water and extracted with ethyl acetate (40 mL). The organic layer was washed with water, dried over MgSO<sub>4</sub>, evaporated and chromatographic separation with silica gel (30% ethyl acetate in hexane as eluent) gave 77 mg (76%) of the desired compound as white solid. Then, the acetylation product, KOH (40.8 mg, 2.0 equiv.) and 5-(bromomethyl)-1,2,3-trimethoxytoluene (104.5 mg, 1.1 equiv.) was added in THF (2.0 mL). The reaction mixture was stirred for 30 min at 70 °C<sup>[25]</sup>. After completion (judged by TLC), THF was removed under reduced pressure and chromatographic separation with silica gel (30% ethyl acetate in hexane as eluent) gave 128.0 mg (65%) of the desired compound 1-(9-(3,4,5-trimethoxybenzyl)-9H-pyrido[2,3-b]indol-6-yl)ethan-1-one (**3b**) as white solid.

$^1\text{H}$  NMR (400 MHz, DMSO):  $\delta$  8.89 (d,  $J = 1.9$  Hz, 1H), 8.79 (d,  $J = 7.1$  Hz, 1H), 8.45 (d,  $J = 6.2$  Hz, 1H), 8.07 (dd,  $J = 8.6, 1.8$  Hz, 1H), 7.70 (d,  $J = 8.6$  Hz, 1H), 7.15-7.10 (m, 1H), 6.97 (s, 2H), 5.83 (s, 2H), 3.71 (s, 6H), 3.61 (s, 3H), 2.65 (s, 3H).

$^{13}\text{C}$ -NMR (100 MHz,  $\text{CDCl}_3$ ):  $\delta$  197.3, 157.0, 154.9, 153.4, 137.9, 135.7, 132.0, 131.8, 128.2, 127.8, 126.4, 123.6, 123.1, 117.5, 109.3, 106.7, 60.4, 56.3, 55.4, 27.0.

HRMS (ESI)  $m/z$  calcd for  $\text{C}_{23}\text{H}_{22}\text{N}_2\text{O}_4$   $[\text{M}+\text{H}]^+$ : 391.1652, Found: 391.1658

#### 5.4 Synthesis of 2-(6*H*-indolo[2,3-*b*]quinoxalin-6-yl)-*N,N*-dimethylethan-1-amine (**3c**):

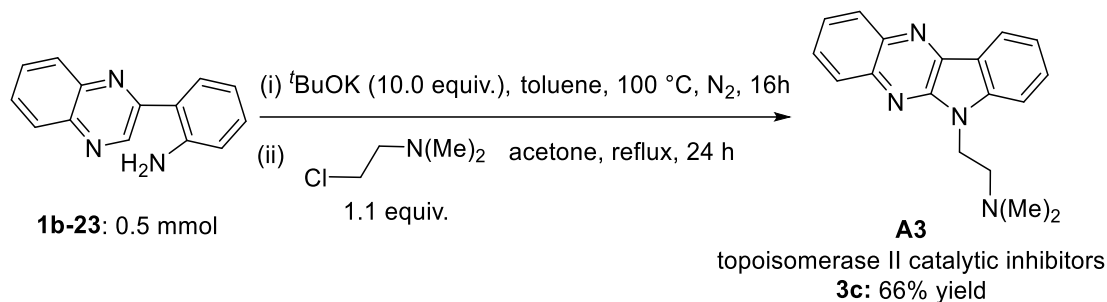

The mixture of 2-(quinoxalin-2-yl)aniline (110.5 mg, 0.5 mmol), <sup>t</sup>BuOK (661.0 mg, 10 equiv.) in dry solvent (5 mL) was sealed in a 25 mL Schlenk tube in glovebox. The tube was removed from the glovebox and heated at 100 °C for 16 hours. After completion (judged by TLC), the mixture was extracted with ethyl acetate (3×40 mL) and brine solution (3×20 mL). The organic layer was collected and dried over anhydrous Na<sub>2</sub>SO<sub>4</sub>. The solvent was removed under reduced pressure to afford the crude product. To this crude product, 2-chloro-*N,N*-dimethylethan-1-amine (59.2 mg, 1.1 equiv.) were added to stirred solution of  $\alpha$ -carboline in acetone (10 mL). The mixture was refluxed for 24 hours and poured into iced water and extracted with ethyl acetate (40 mL)<sup>[26]</sup>. The organic layer was washed with water, dried over MgSO<sub>4</sub>, evaporated and chromatographic separation with silica gel (30% ethyl acetate in hexane as eluent) gave 95.7 mg (66%) of the desired compound 2-(6*H*-indolo[2,3-*b*]quinoxalin-6-yl)-*N,N*-dimethylethan-1-amine (**3c**) as a yellow solid.

<sup>1</sup>H NMR (400 MHz, DMSO)  $\delta$  8.33 (dd,  $J = 7.7, 1.0$  Hz, 1H), 8.26-8.19 (m, 1H), 8.06 (dt,  $J = 8.4, 0.9$  Hz, 1H), 7.80-7.66 (m, 4H), 7.40-7.33 (m, 1H), 4.52 (t,  $J = 6.6$  Hz, 2H), 2.71 (t,  $J = 6.5$  Hz, 2H), 2.18 (d,  $J = 0.8$  Hz, 6H).

<sup>13</sup>C-NMR (100 MHz, CDCl<sub>3</sub>)  $\delta$  145.4, 144.6, 140.3, 139.8, 139.0, 131.7, 129.5, 129.3, 128.0, 126.4, 122.6, 121.3, 119.0, 110.9, 57.2, 45.8.

HRMS (ESI)  $m/z$  calcd for C<sub>18</sub>H<sub>18</sub>N<sub>4</sub> [M+H]<sup>+</sup>: 291.1604, Found: 291.1613



### 5.5 Scale-up experiment:

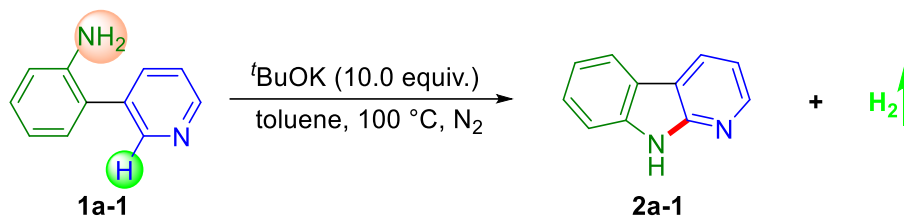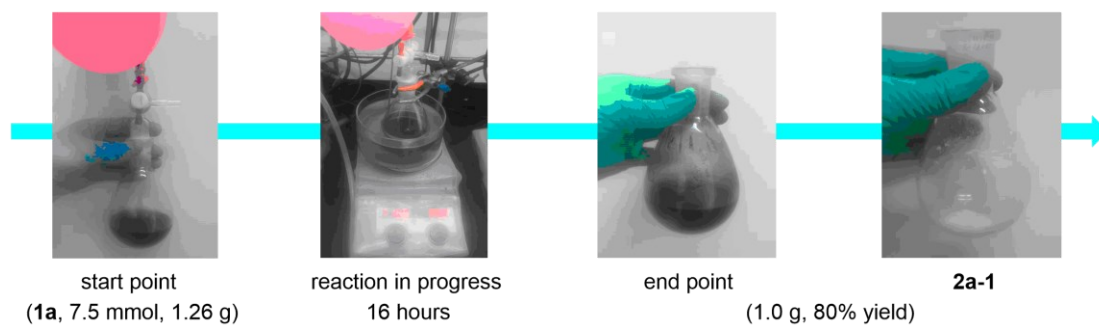

The mixture of 2-(pyridin-3-yl)aniline (1.26 g, 7.5 mmol), <sup>t</sup>BuOK (8.55 g, 10 equiv.) was added in a 100 mL round-bottom flask. The flask was evacuated and back filled with nitrogen and this sequence was repeated three additional times. Under the positive flow of nitrogen, toluene (25 ml) was added to the reaction mixture. The reaction was heated at 100 °C for 16 hours. The mixture was extracted with ethyl acetate (3×200 mL) and brine solution (3×100 mL). The organic layer was collected and dried over anhydrous Na<sub>2</sub>SO<sub>4</sub>. The solvent was evaporated under reduced pressure and chromatographic separation with silica gel (33% ethyl acetate in hexane as eluent) to give of the product **2a-1** (1.0 g, 80%) as a white solid.

## 6. Mechanistic Studies

### 1. Replace 2-H of pyridine with F, Cl, Br, I

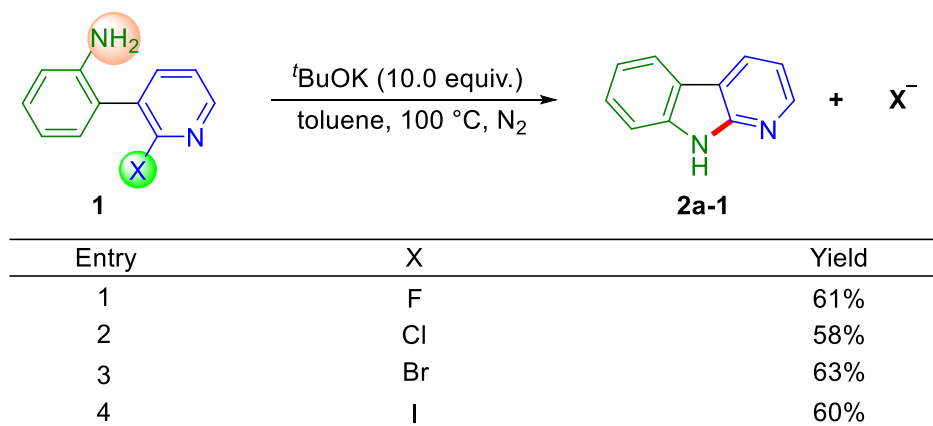

The mixture of 2-substitution pyridine of substrate (0.2 mmol), <sup>t</sup>BuOK (224.0 mg, 10 equiv.) in dry toluene (2 mL) was sealed in a 25 mL Schlenk tube in glovebox. The tube was removed from the glovebox and heated at 100 °C for 16h. The mixture was extracted with ethyl acetate (3×20 mL) and brine solution (3×10 mL). The organic layer was collected and dried over anhydrous Na<sub>2</sub>SO<sub>4</sub>. The solvent was evaporated under reduced pressure and chromatographic separation with silica gel (30% ethyl acetate in hexane as eluent) to give 20.5 mg (61%), 19.5 mg (58%), 21.2 mg (63%), 20.2 mg (60%) of the product respectively.

### 2. Real Time <sup>1</sup>H NMR Analysis:

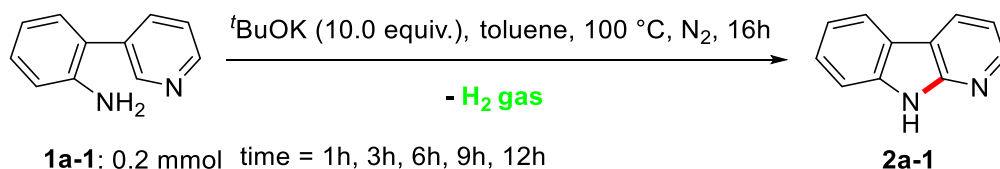

The mixture of 2-(pyridin-3-yl)aniline (**1a-1**)(34.0 mg, 0.2 mmol), <sup>t</sup>BuOK (224.0 mg, 10 equiv.) in dry solvent (2 mL) was sealed in a 25 mL Schlenk tube in glovebox. The tube was removed from the glovebox and heated at 100 °C. Then, Ethyl acetate (5 ml)

was added to quench the reaction when reaction times were one-hour, three-hour, six-hour, nine-hour, twelve-hour, respectively. The mixture was extracted thrice with ethyl acetate (3×20 mL) and brine solution (3×25 mL). The organic layer was collected and dried over anhydrous Na<sub>2</sub>SO<sub>4</sub>. The solvent was evaporated under reduced pressure. The residue was measured by <sup>1</sup>H NMR spectroscopy using 1,3,5-trimethoxytoluene as an internal standard (**Figure S2**). The residue chromatographic separation with silica gel gave the isolated intermediate **4** (**Figure S3**).

<sup>1</sup>H NMR (400 MHz, DMSO-*d*<sub>6</sub>): δ 9.42 (s, 1H), 8.55 (d, *J* = 4.5 Hz, 2H), 7.76 (d, *J* = 7.8 Hz, 1H), 7.48-7.42 (m, 2H), 7.42-7.29 (m, 3H), 1.86 (s, 3H). <sup>13</sup>C NMR (100 MHz, DMSO-*d*<sub>6</sub>): 13C NMR (101 MHz, dms): δ 169.0, 149.5, 148.6, 136.4, 135.7, 135.3, 134.1, 130.7, 128.9, 127.8, 126.6, 123.8, 23.3. HRMS (ESI) *m/z* calcd for C<sub>13</sub>H<sub>11</sub>N<sub>2</sub>O [M+H]<sup>+</sup>: 213.0128, Found: 213.1035.

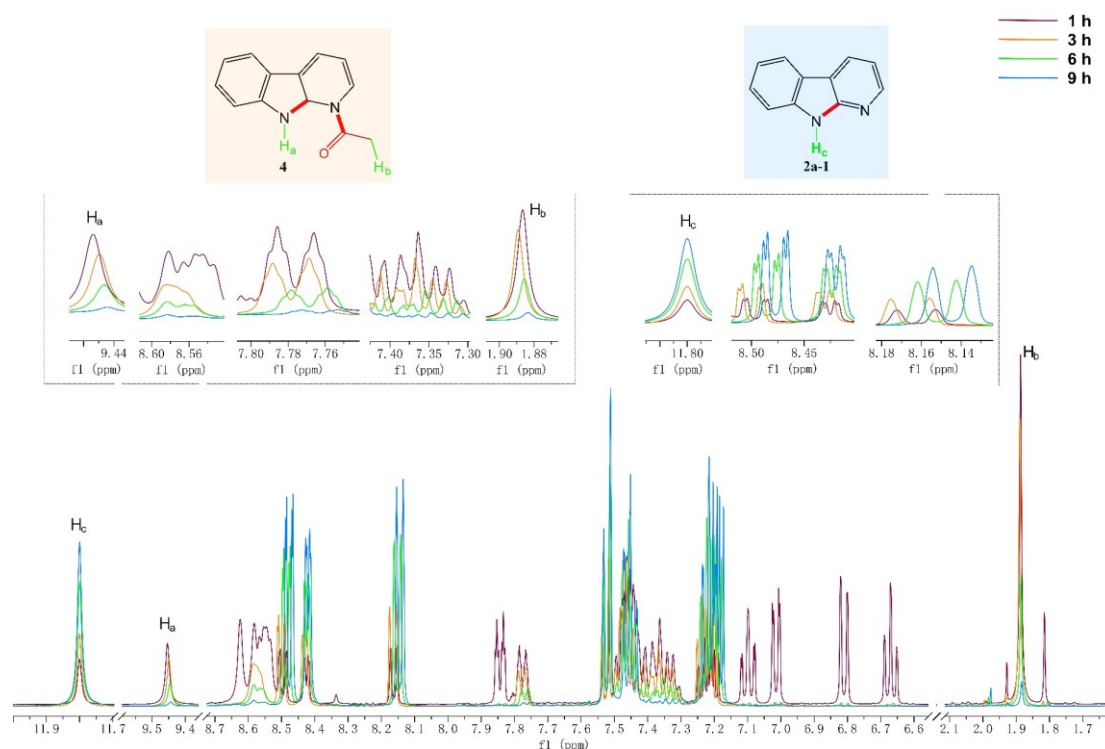

**Figure S1.** Real time <sup>1</sup>H NMR studies.

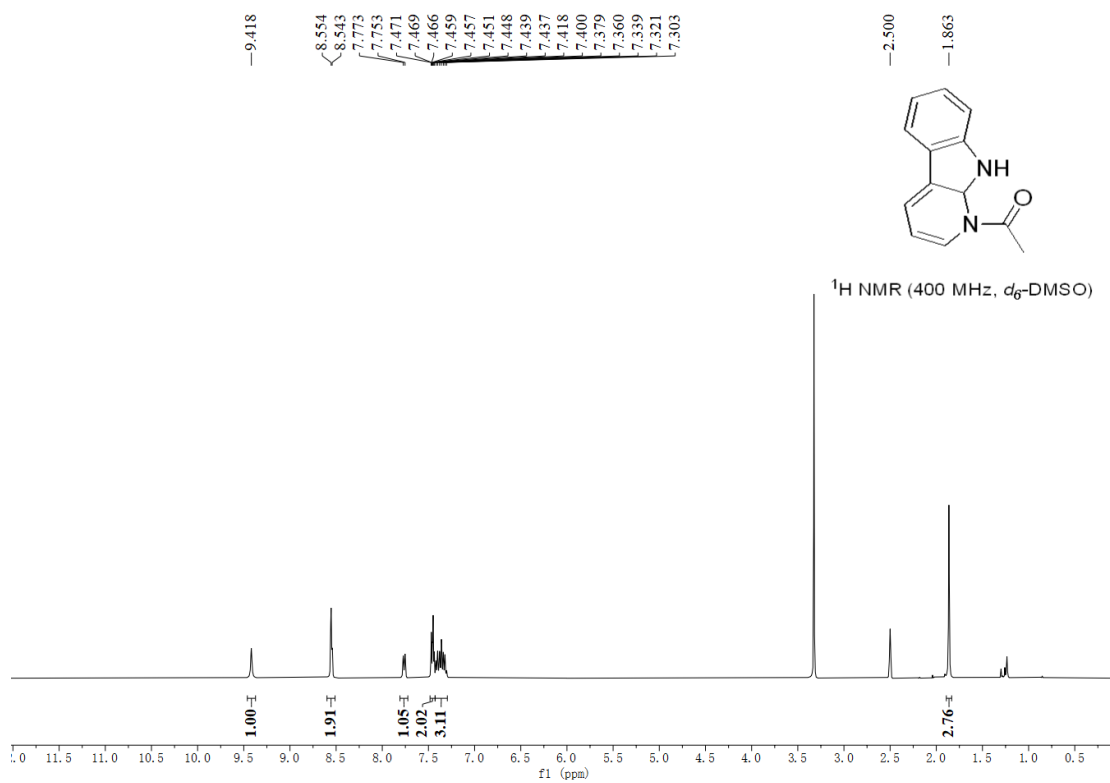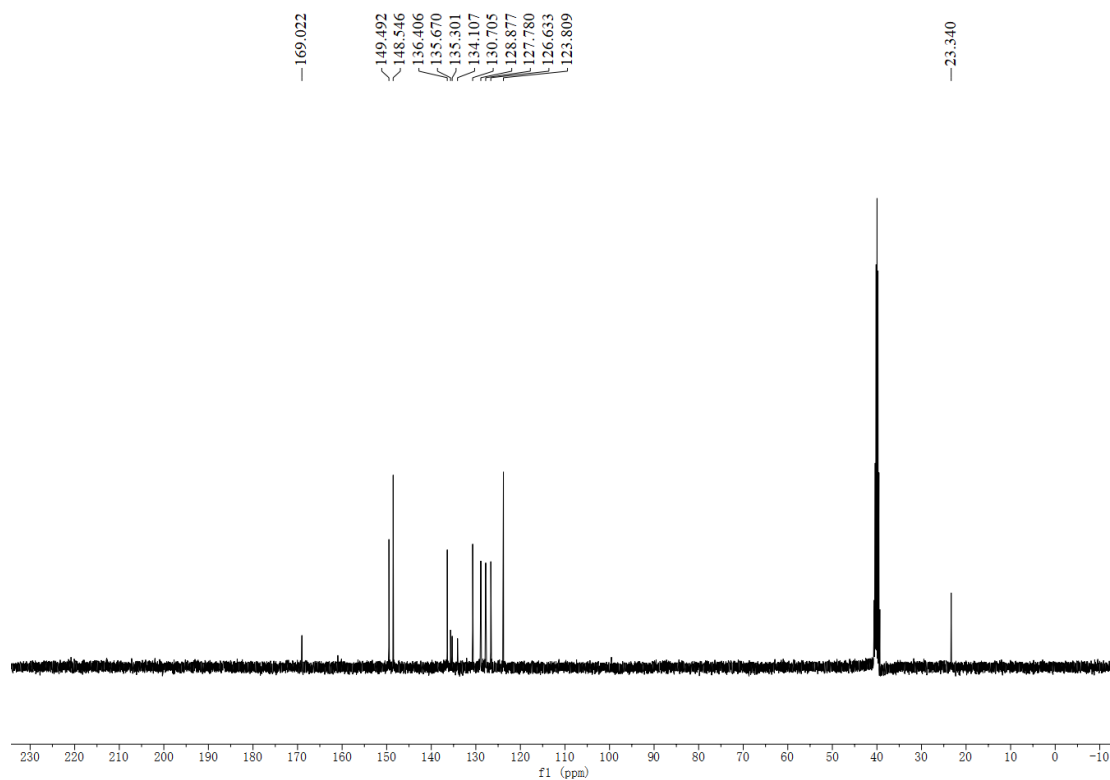

**Figure S2.** Spectrum of isolated intermediate.

## 7. X-Ray Ellipsoid Plots of 2a-31, 2a-34 and 2b-21

### Single crystal structure of 2a-31:

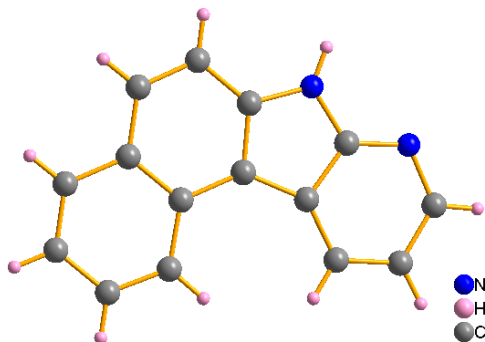

**Table S9.** Crystal data of compound **2a-31** at room temperature

| Compounds                                                  | 7H-benzo[e]pyrido[2,3-b]indole                 |
|------------------------------------------------------------|------------------------------------------------|
| CCDC Name                                                  | CCDC 2224160                                   |
| Chemical Formula                                           | C <sub>15</sub> H <sub>10</sub> N <sub>2</sub> |
| Formula Weight                                             | 218.25                                         |
| Temperature(K)                                             | 296                                            |
| Crystal System                                             | Monoclinic                                     |
| Space Group                                                | <i>P</i> 21/ <i>n</i>                          |
| <i>a</i> (Å)                                               | 5.0243(19)                                     |
| <i>b</i> (Å)                                               | 15.100(6)                                      |
| <i>c</i> (Å)                                               | 14.285(6)                                      |
| $\alpha$ (°)                                               | 90.00                                          |
| $\beta$ (°)                                                | 93.425(7)                                      |
| $\gamma$ (°)                                               | 90.00                                          |
| Volume[Å <sup>3</sup> ]                                    | 1081.8(7)                                      |
| <i>Z</i>                                                   | 4                                              |
| <i>D</i> <sub>calc</sub> (g/cm <sup>3</sup> )              | 1.340                                          |
| <i>F</i> (000)                                             | 456.0                                          |
| GOF, <i>S</i>                                              | 1.182                                          |
| <i>R</i> <sub>1</sub> , <i>wR</i> <sub>2</sub> (obsd data) | 0.1310, 0.2497                                 |
| <i>R</i> <sub>1</sub> , <i>wR</i> <sub>2</sub> (all data)  | 0.1217, 0.2255                                 |

### Single crystal structure of 2a-34:

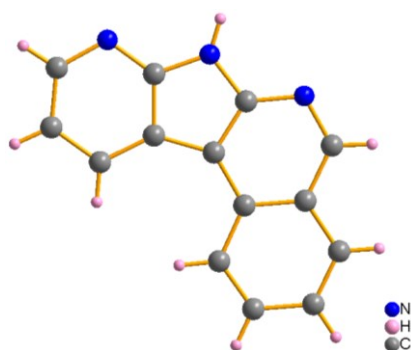

**Table S10.** Crystal data of compound **2a-34** at room temperature

| Compounds                                                  | 7H-pyrido[3',2':4,5]pyrrolo[2,3-c]isoquinoline |
|------------------------------------------------------------|------------------------------------------------|
| CCDC Name                                                  | CCDC 2224157                                   |
| Chemical Formula                                           | C <sub>14</sub> H <sub>9</sub> N <sub>3</sub>  |
| Formula Weight                                             | 219.24                                         |
| Temperature(K)                                             | 296                                            |
| Crystal System                                             | Monoclinic                                     |
| Space Group                                                | <i>P</i> 21/ <i>c</i>                          |
| <i>a</i> (Å)                                               | 9.977(3)                                       |
| <i>b</i> (Å)                                               | 5.2487(13)                                     |
| <i>c</i> (Å)                                               | 20.047(5)                                      |
| $\alpha$ (°)                                               | 90.00                                          |
| $\beta$ (°)                                                | 96.257(4)                                      |
| $\gamma$ (°)                                               | 90.00                                          |
| Volume[Å <sup>3</sup> ]                                    | 1043.6(5)                                      |
| <i>Z</i>                                                   | 4                                              |
| <i>D</i> <sub>calc</sub> (g/cm <sup>3</sup> )              | 1.395                                          |
| <i>F</i> (000)                                             | 456.0                                          |
| GOF, <i>S</i>                                              | 1.126                                          |
| <i>R</i> <sub>1</sub> , <i>wR</i> <sub>2</sub> (obsd data) | 0.0511, 0.1581                                 |
| <i>R</i> <sub>1</sub> , <i>wR</i> <sub>2</sub> (all data)  | 0.1577, 0.2359                                 |

## Single crystal structure of 2b-21:

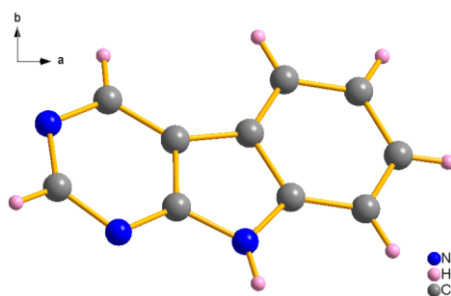

**Table S11.** Crystal data of compound **2b-21** at room temperature

| Compounds                                                  | 9H-pyrimido[4,5-b]indole                      |
|------------------------------------------------------------|-----------------------------------------------|
| CCDC Name                                                  | CCDC 2224156                                  |
| Chemical Formula                                           | C <sub>10</sub> H <sub>7</sub> N <sub>3</sub> |
| Formula Weight                                             | 160.19                                        |
| Temperature(K)                                             | 296                                           |
| Crystal System                                             | Monoclinic                                    |
| Space Group                                                | C2/c                                          |
| <i>a</i> (Å)                                               | 18.096(6)                                     |
| <i>b</i> (Å)                                               | 5.6801(19)                                    |
| <i>c</i> (Å)                                               | 16.380(6)                                     |
| $\alpha$ (°)                                               | 90.00                                         |
| $\beta$ (°)                                                | 103.239(5)                                    |
| $\gamma$ (°)                                               | 90.00                                         |
| Volume[Å <sup>3</sup> ]                                    | 1638.9(10)                                    |
| Z                                                          | 8                                             |
| <i>D</i> <sub>calc</sub> (g/cm <sup>3</sup> )              | 1.371                                         |
| <i>F</i> (000)                                             | 704.0                                         |
| GOF, <i>S</i>                                              | 1.118                                         |
| <i>R</i> <sub>1</sub> , <i>wR</i> <sub>2</sub> (obsd data) | 0.0506, 0.1267                                |
| <i>R</i> <sub>1</sub> , <i>wR</i> <sub>2</sub> (all data)  | 0.1501, 0.1821                                |

## 8. NMR Spectra of Substrates and Products

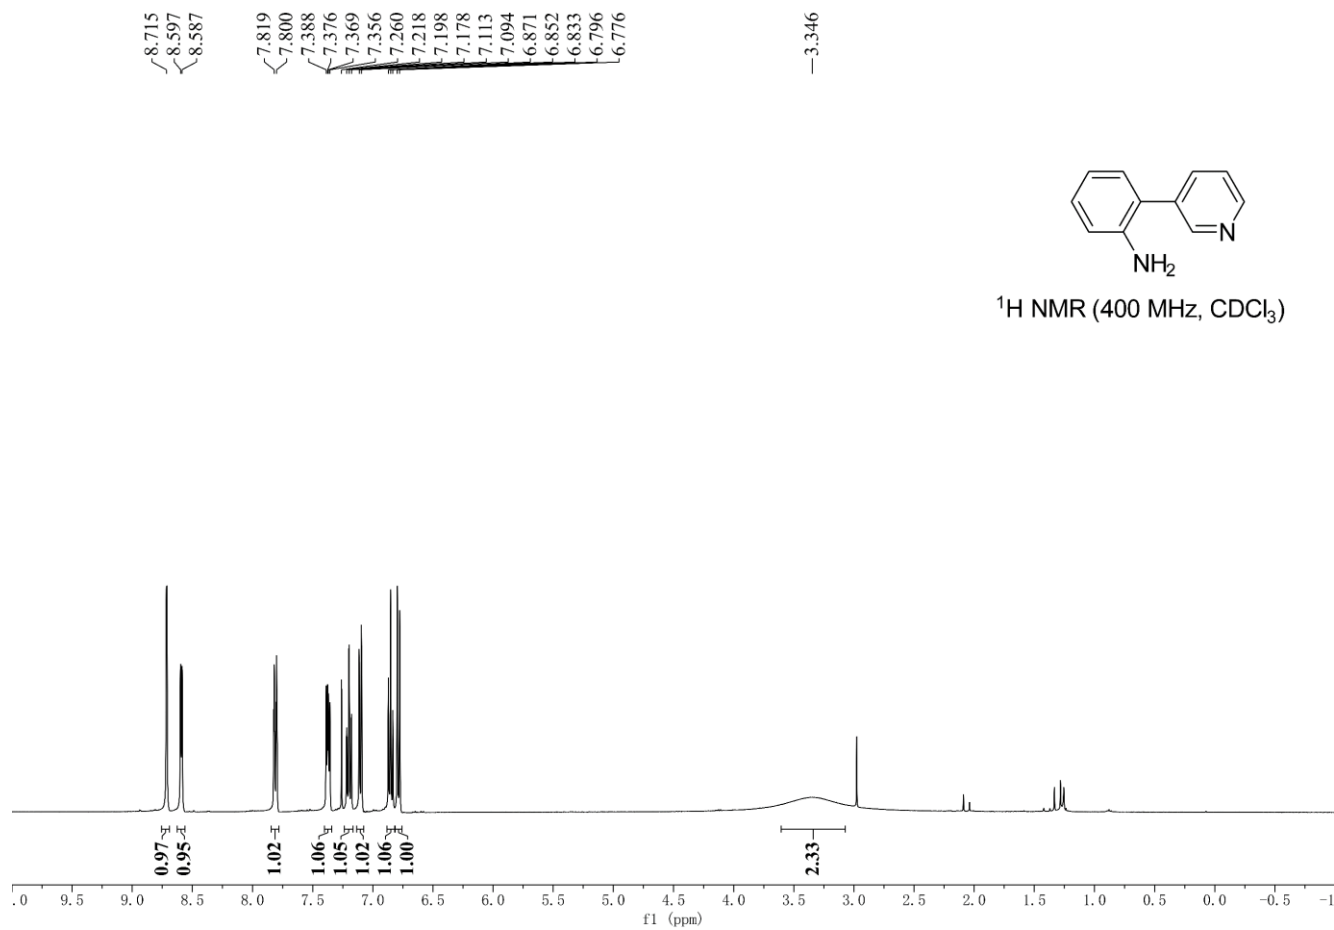



149.845  
148.173  
143.745  
136.632  
135.563  
130.552  
129.383  
123.831  
123.695  
118.935  
115.888

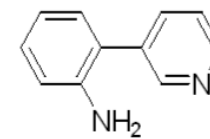

<sup>13</sup>C NMR (101 MHz, CDCl<sub>3</sub>)

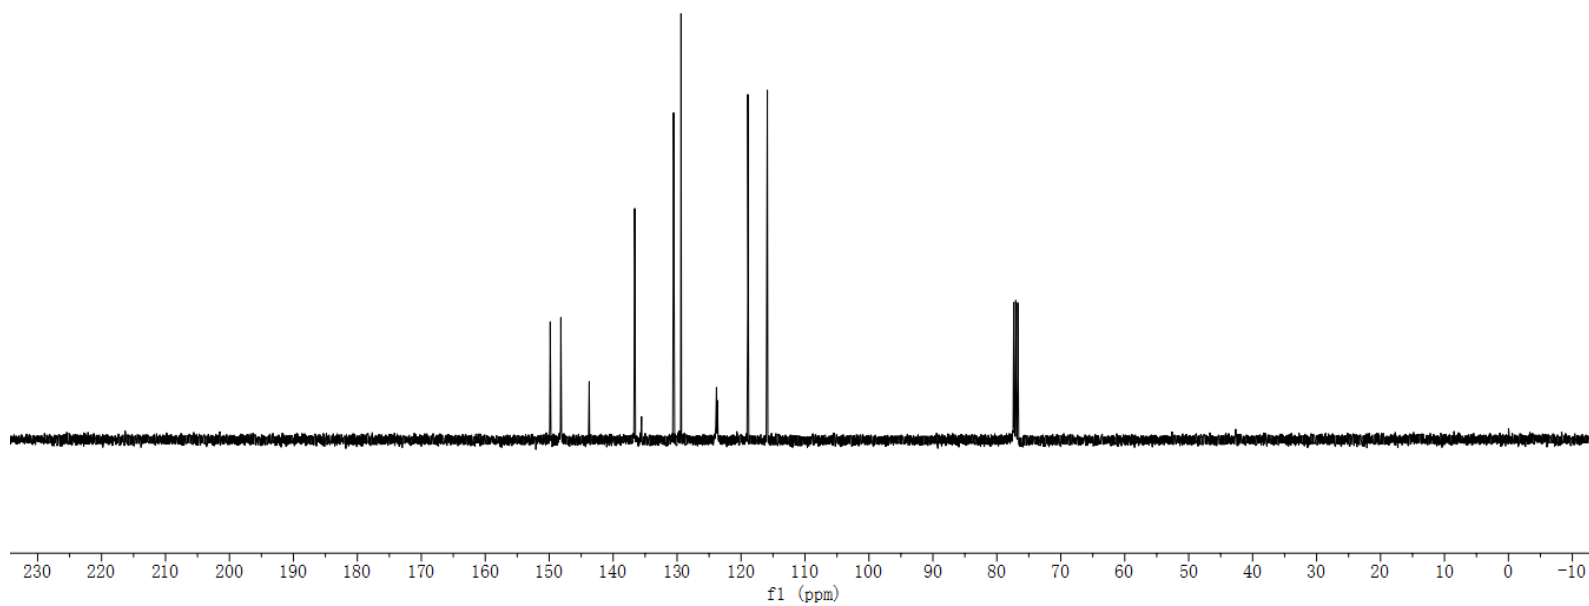

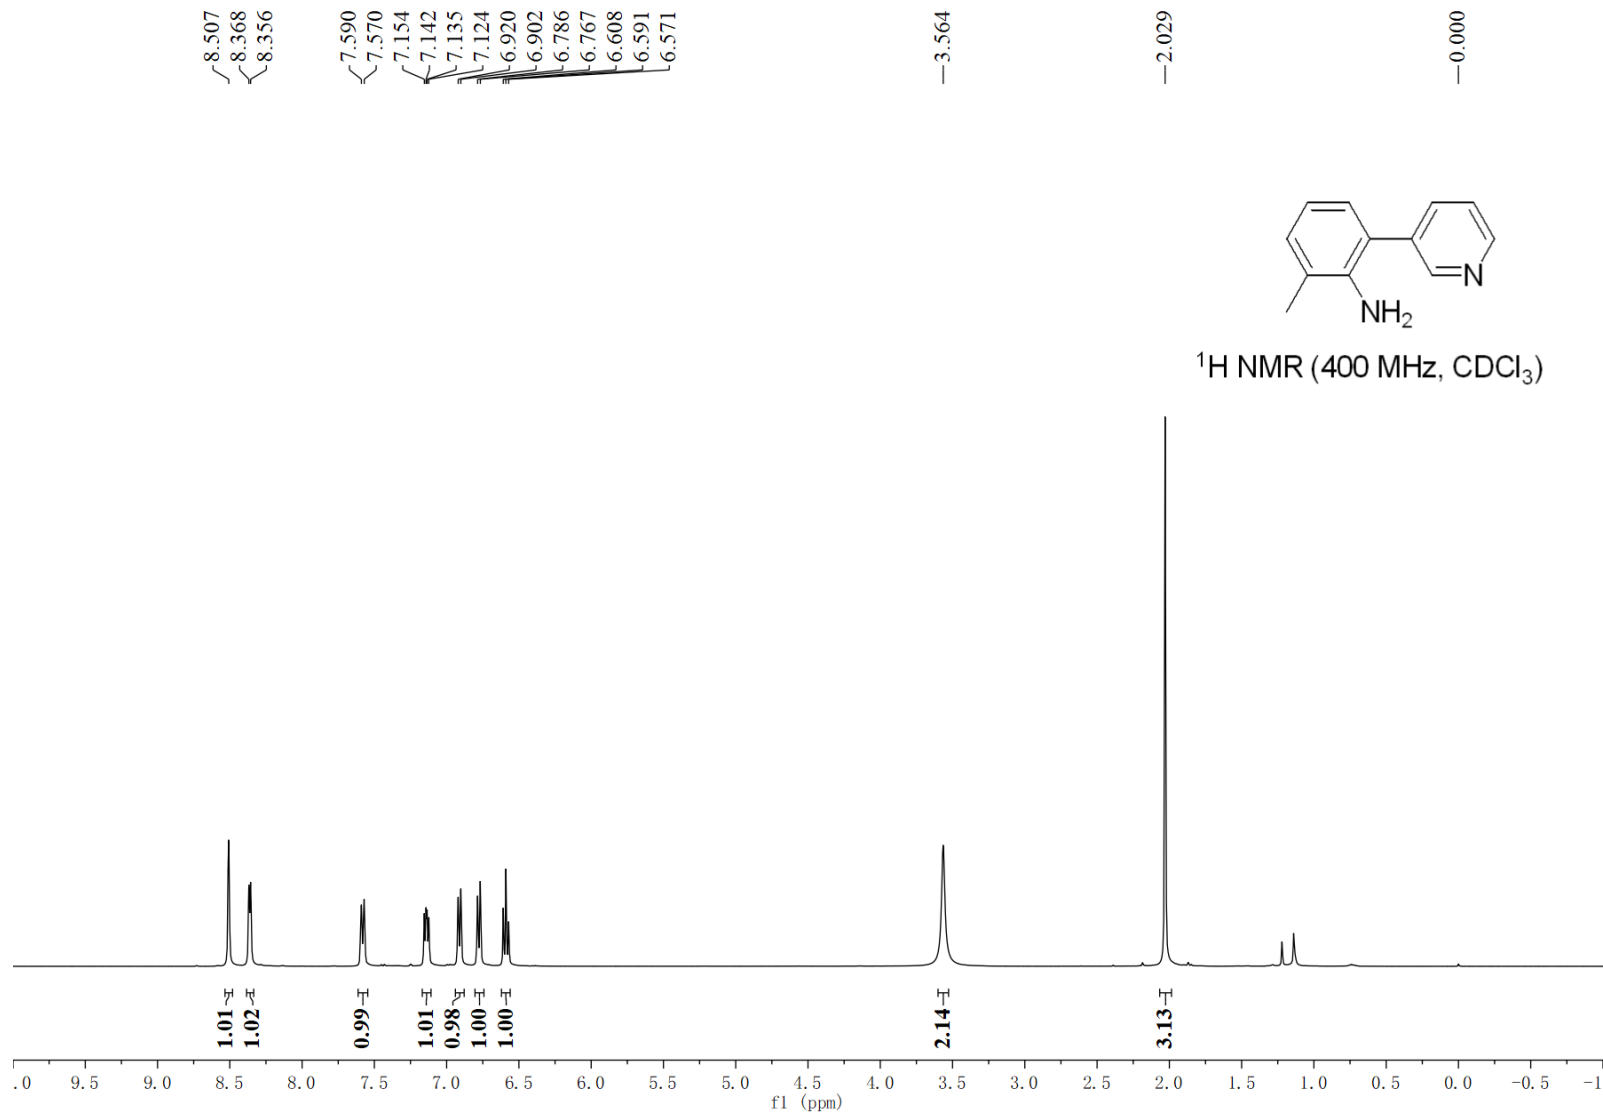

150.053  
148.171  
142.048  
136.710  
135.711  
130.511  
128.367  
123.559  
123.364  
122.684  
118.212

-17.843

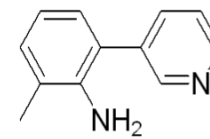

<sup>13</sup>C NMR (100 MHz, CDCl<sub>3</sub>)

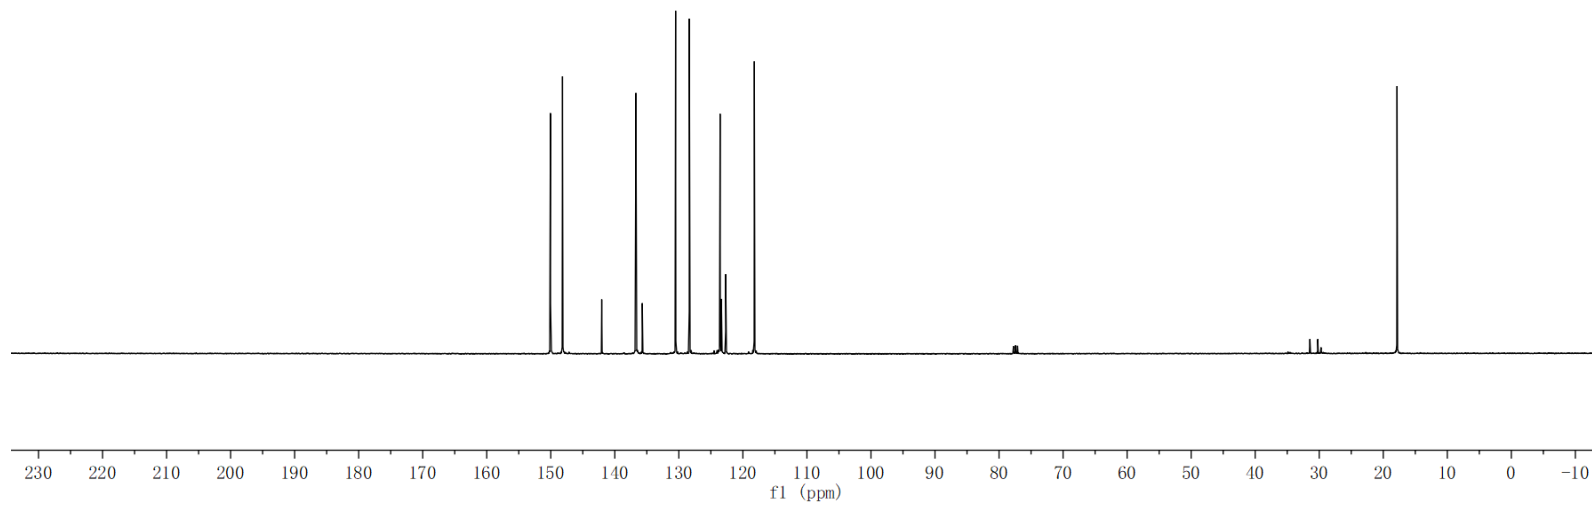

150.039  
148.088  
143.633  
139.365  
136.516  
135.393  
130.427  
123.569  
121.016  
119.847  
116.517

-21.233

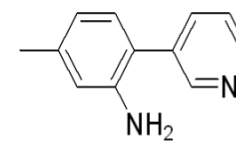

<sup>13</sup>C NMR (100 MHz, CDCl<sub>3</sub>)

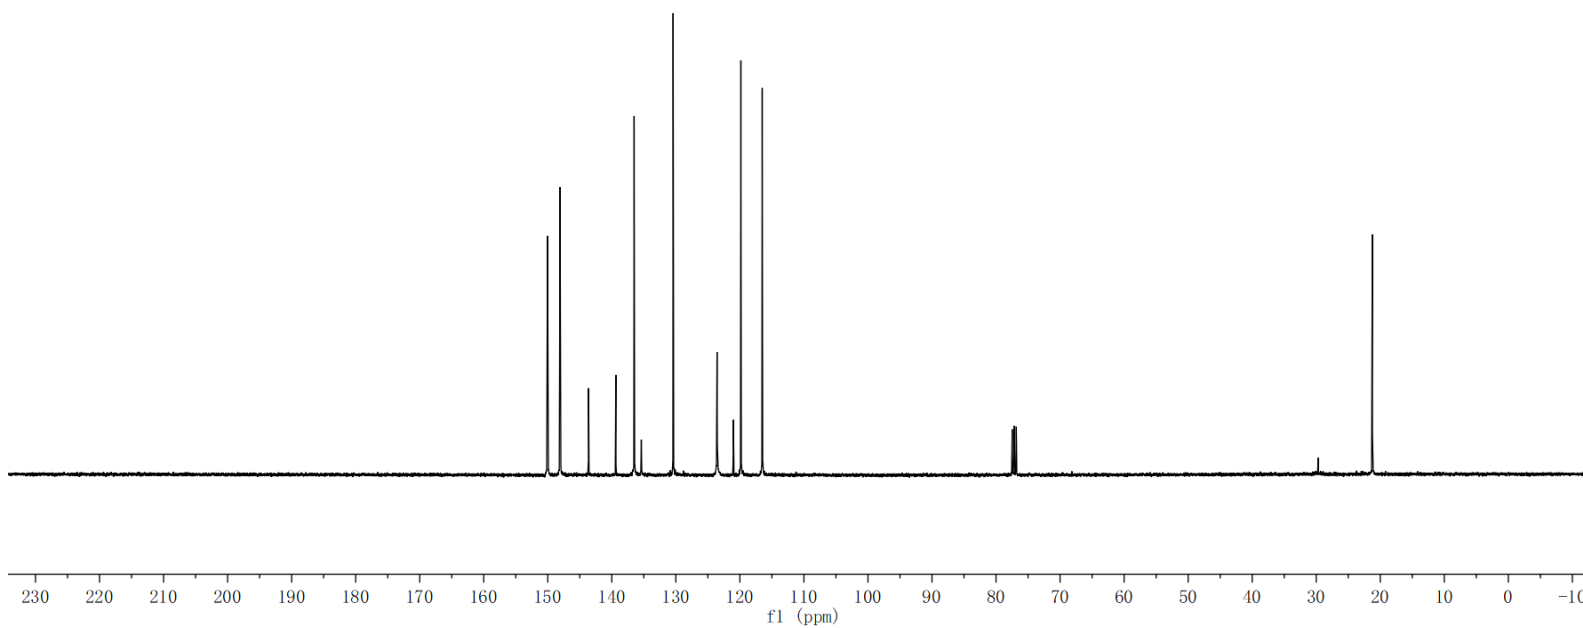

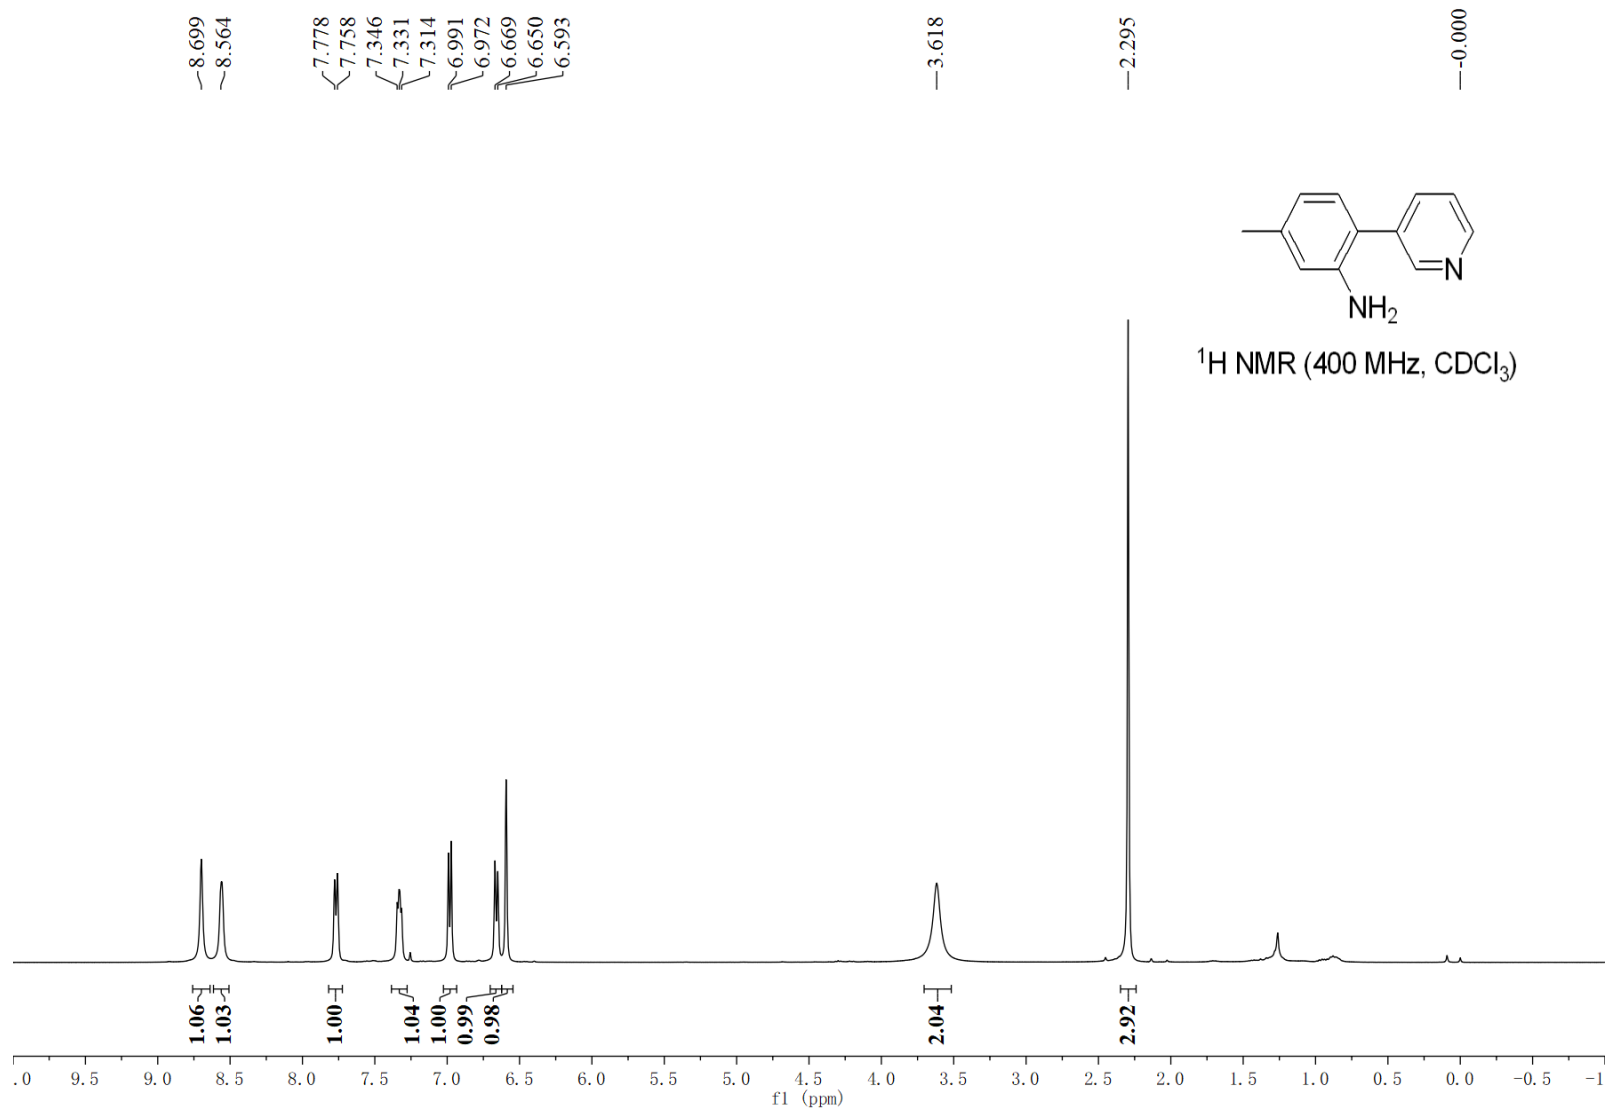

150.039  
148.088  
143.633  
139.365  
136.516  
135.393  
130.427  
123.569  
121.016  
119.847  
116.517

-21.233

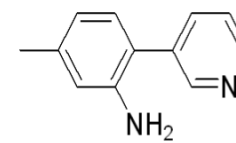

$^{13}\text{C}$  NMR (100 MHz,  $\text{CDCl}_3$ )

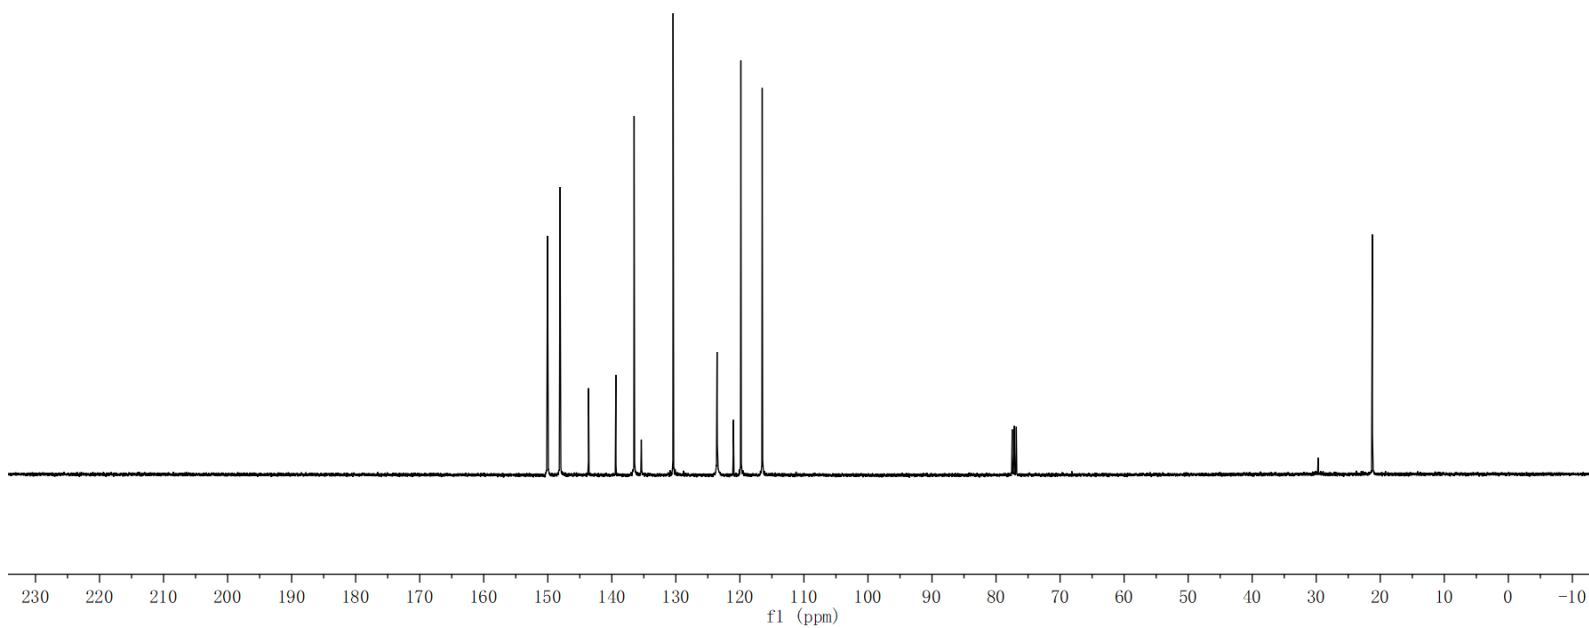

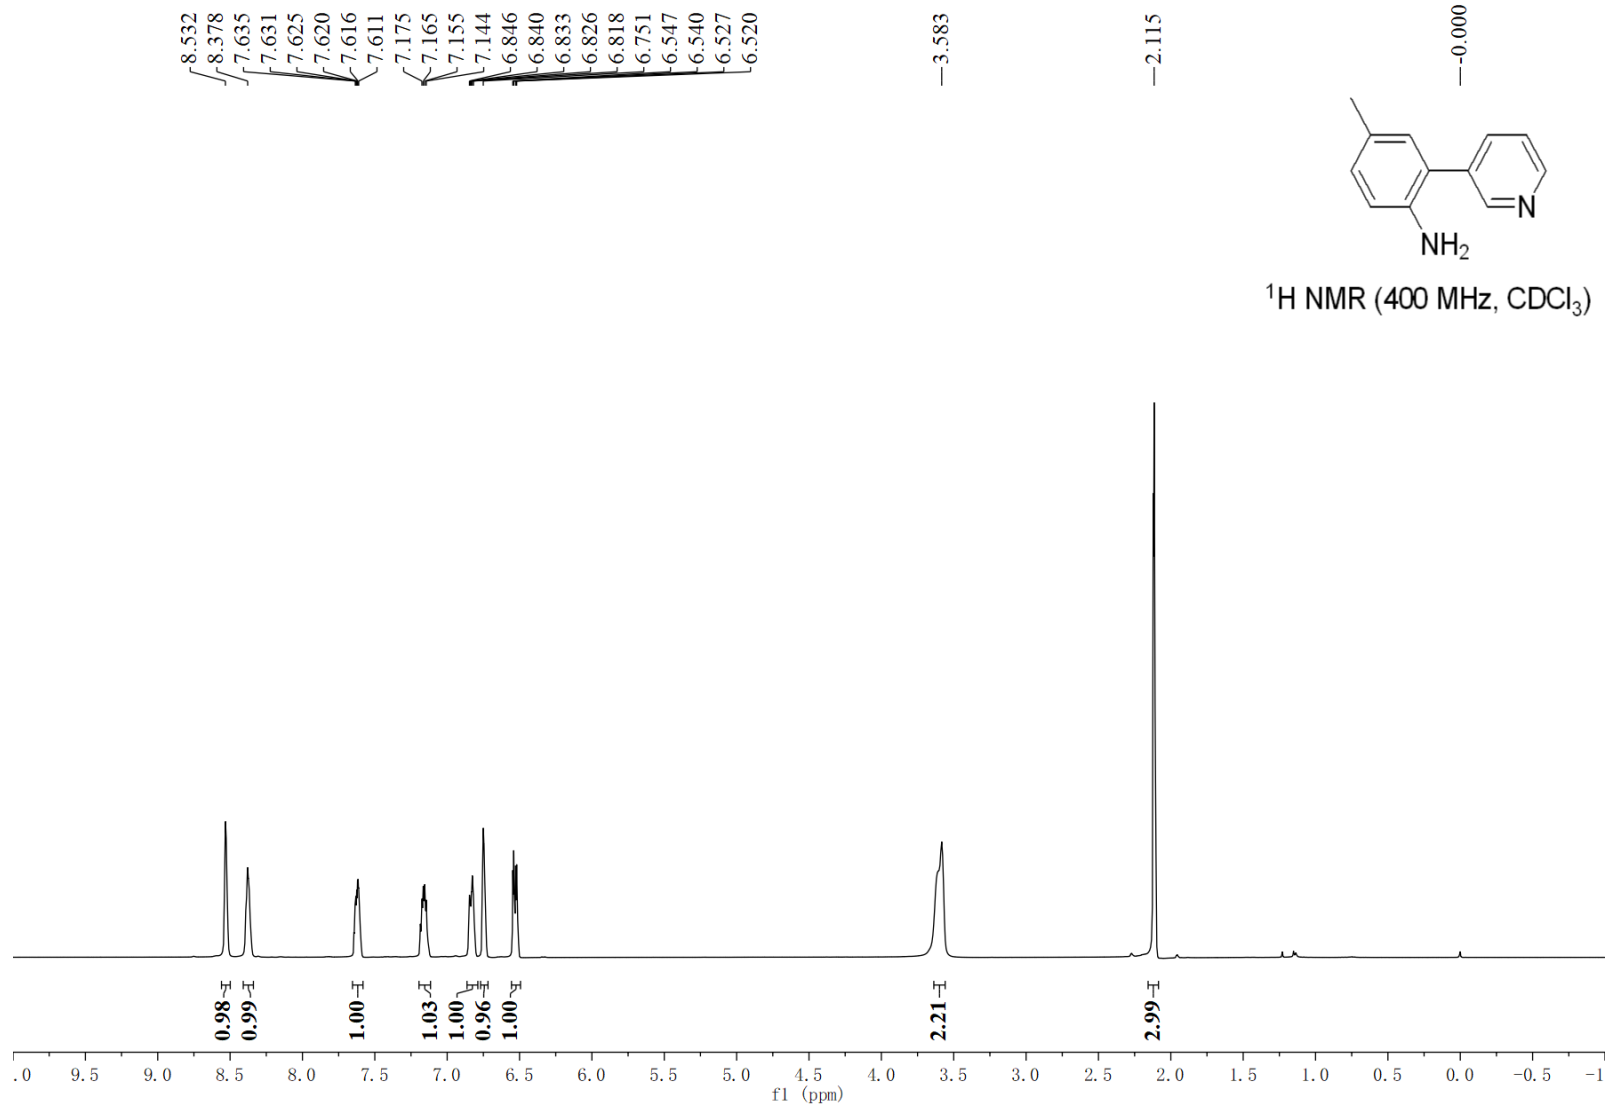

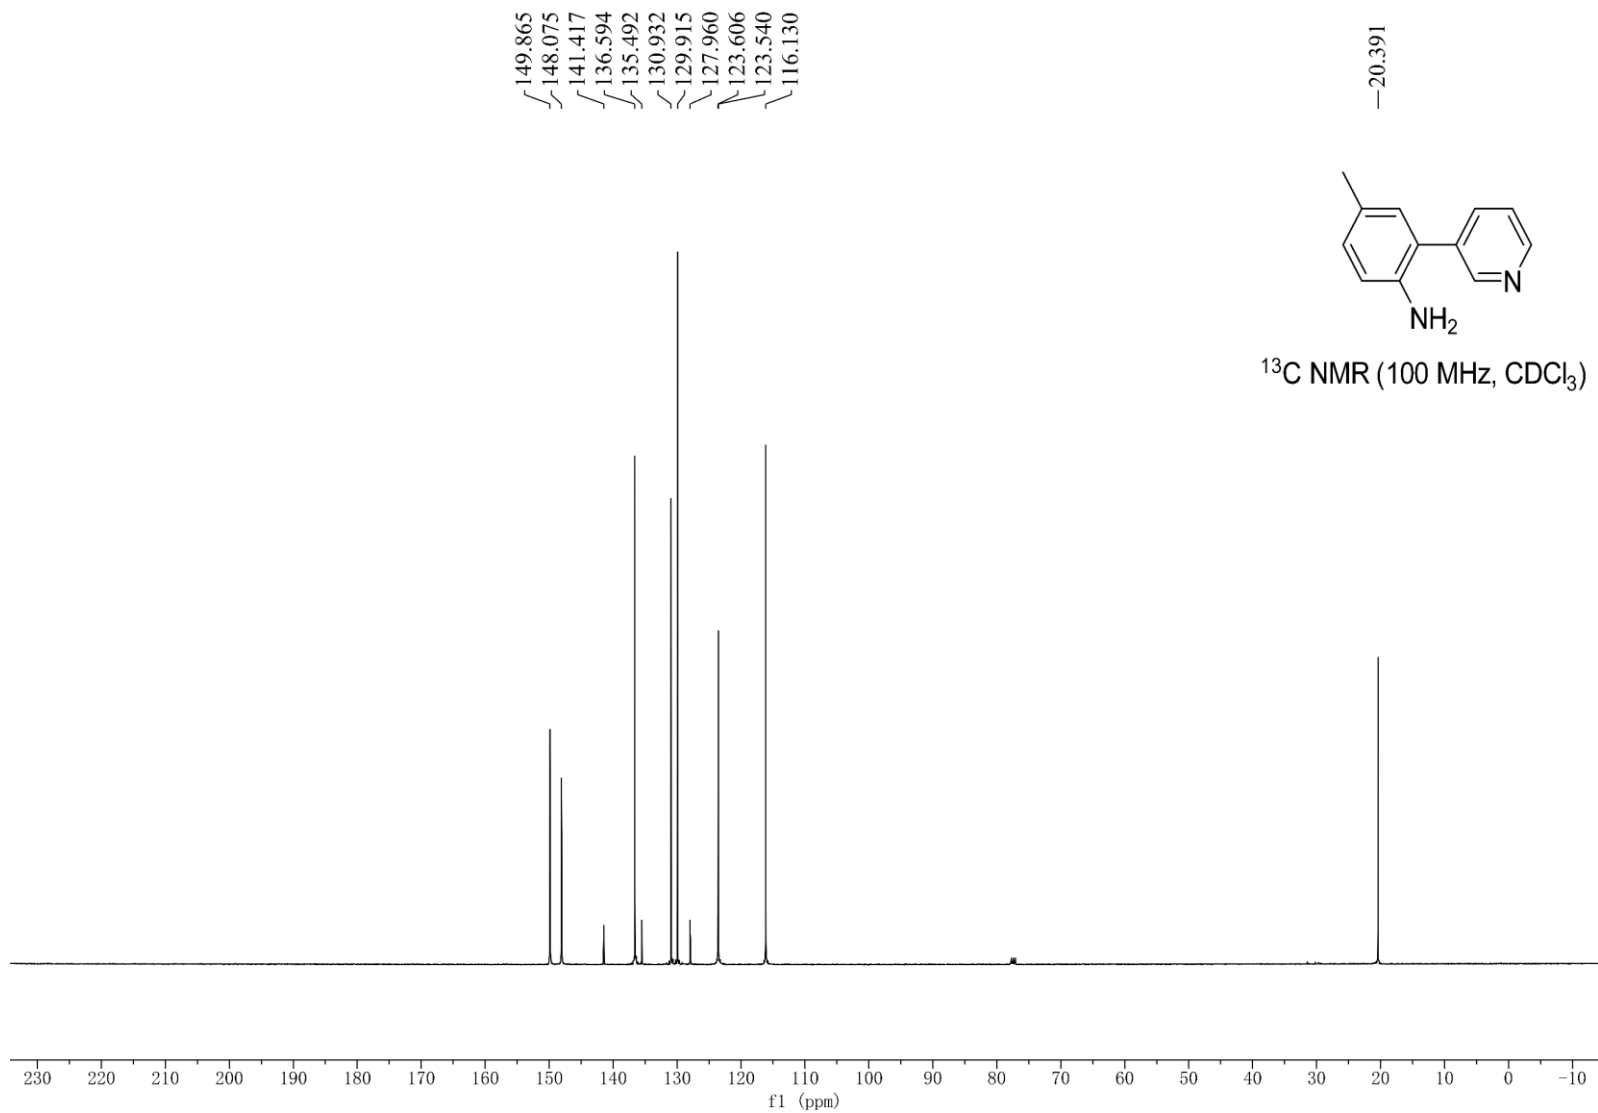



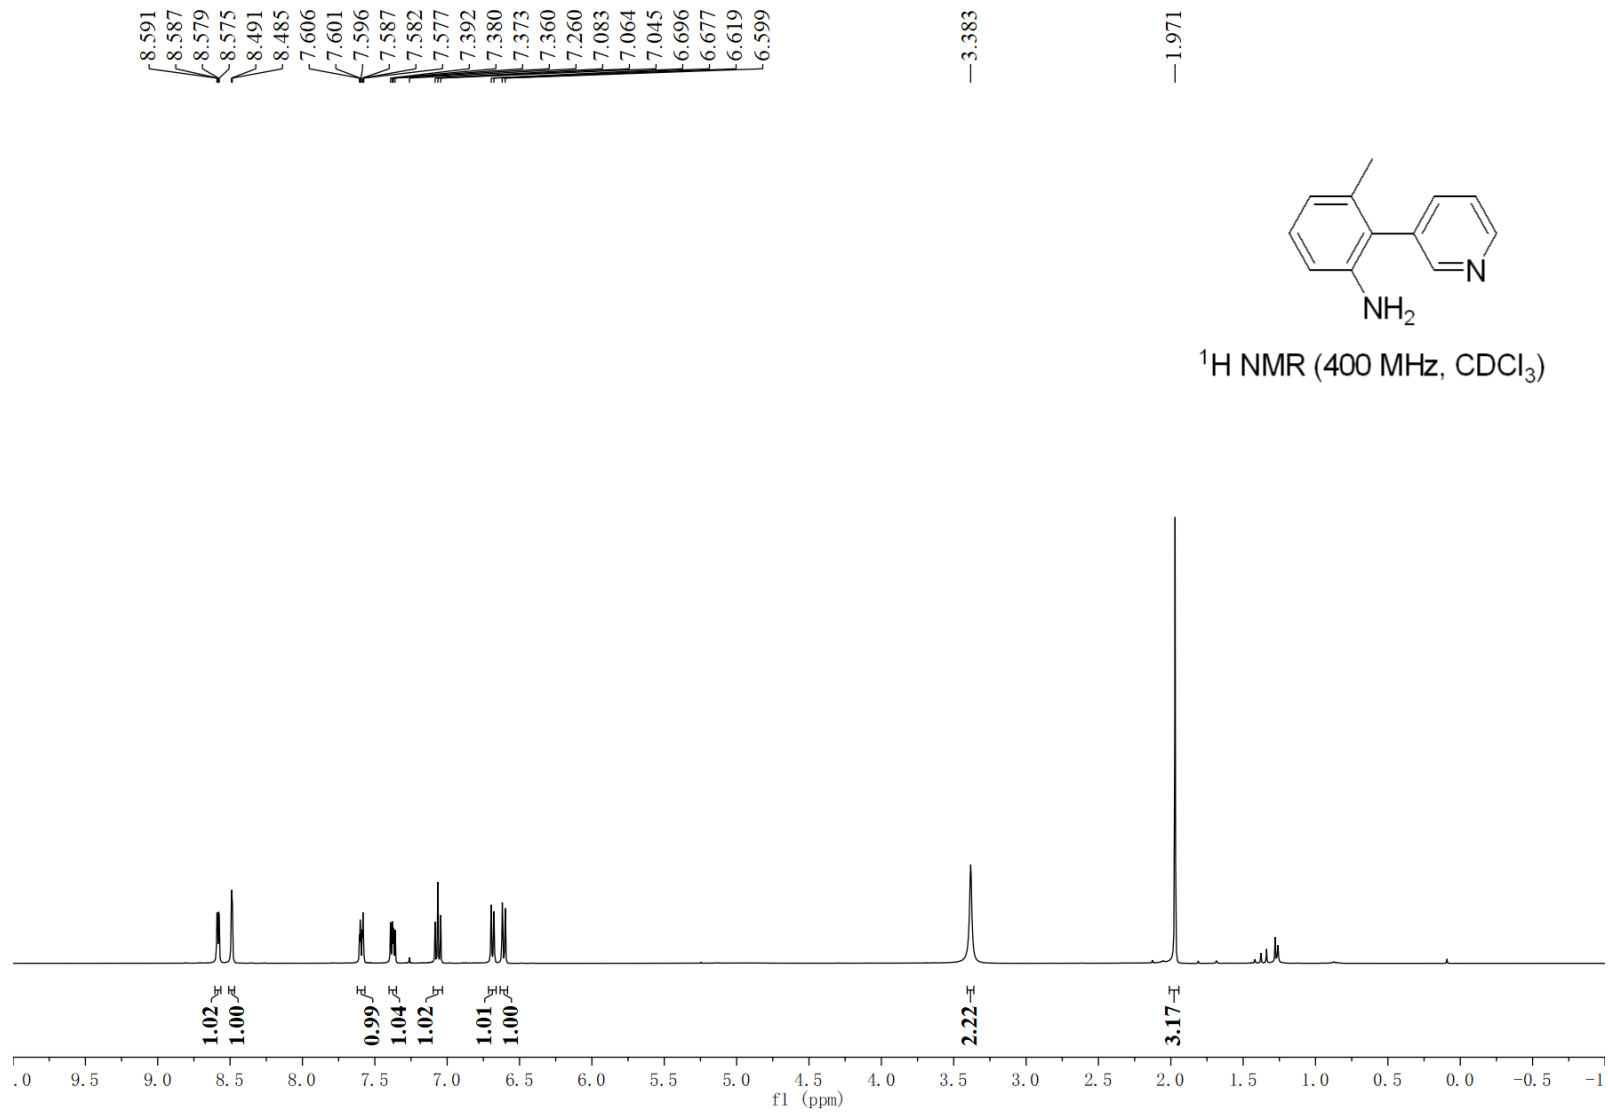

150.854  
148.534  
144.322  
137.935  
137.111  
134.100  
128.818  
123.953  
123.518  
120.101  
113.038

20.688

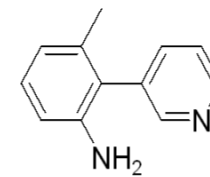

$^{13}\text{C}$  NMR (100 MHz,  $\text{CDCl}_3$ )

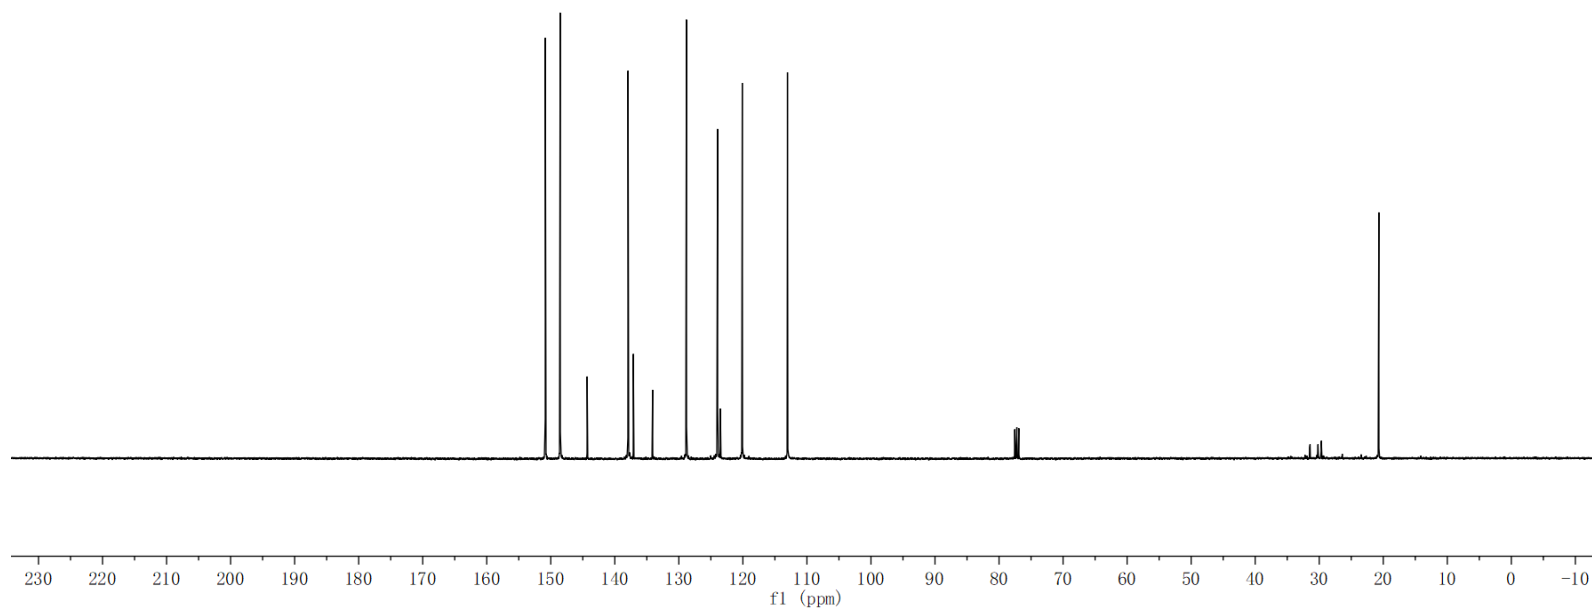

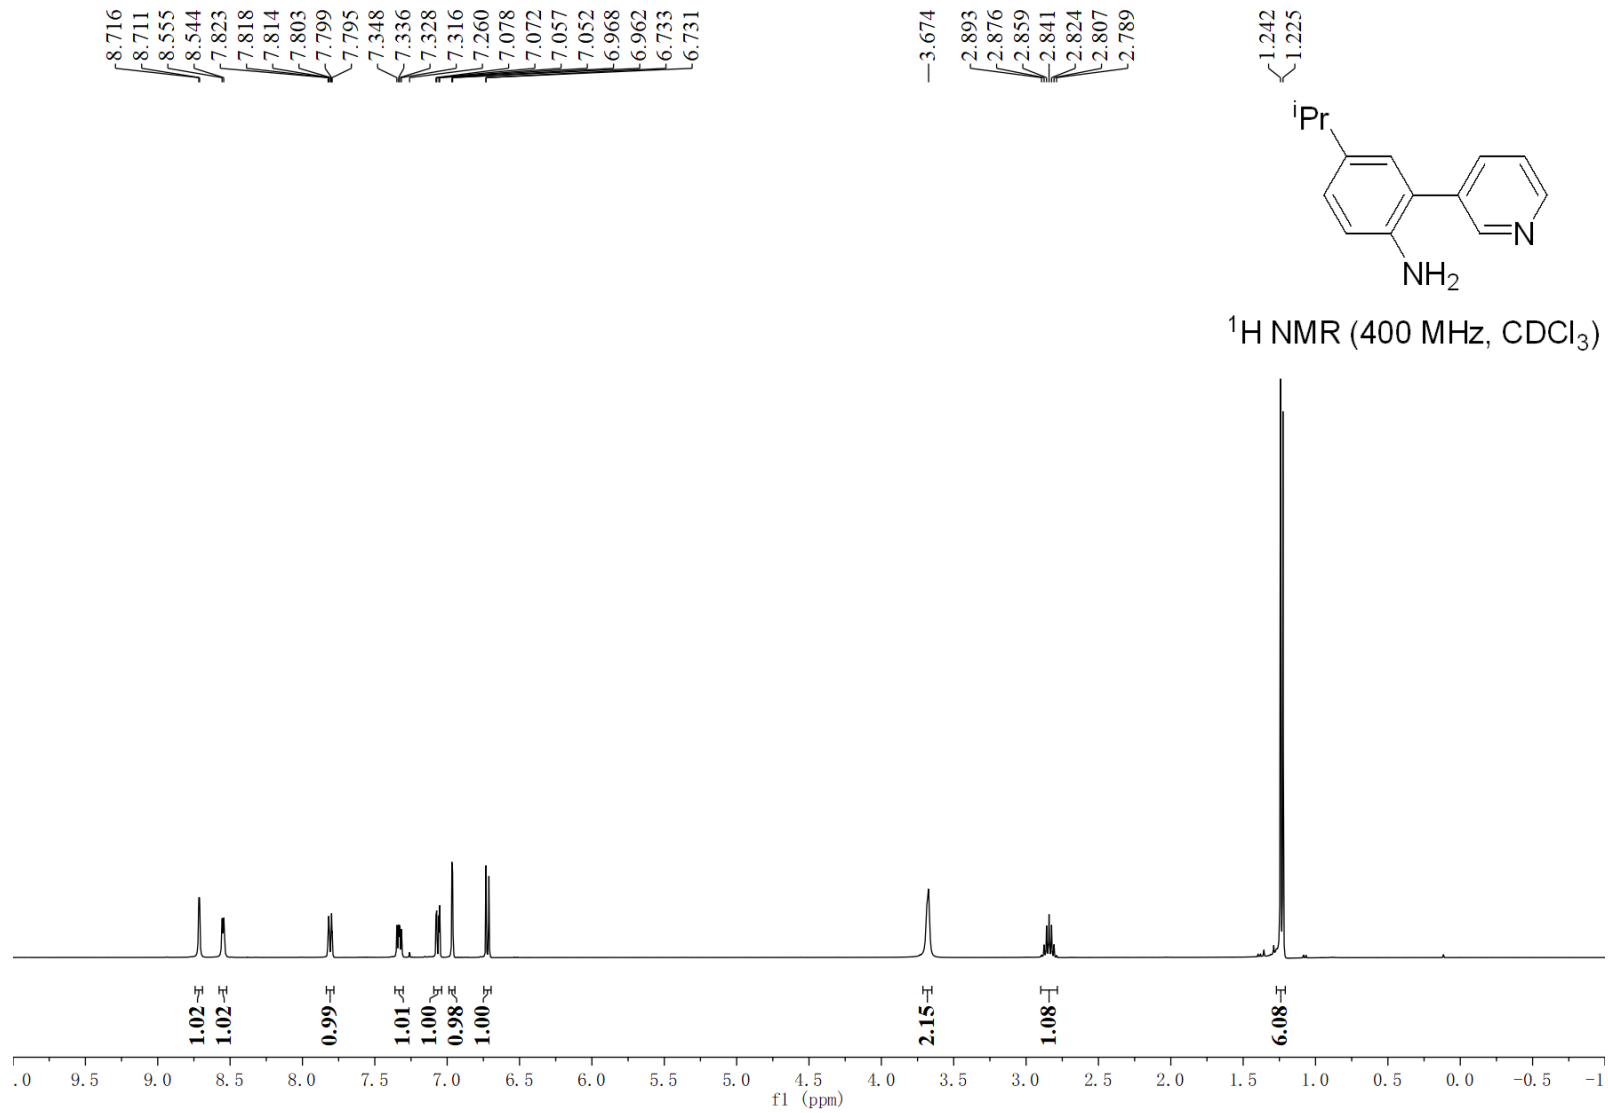

150.005  
148.164  
141.695  
139.398  
136.623  
135.651  
128.432  
127.305  
123.591  
123.534  
116.091

33.217  
24.269

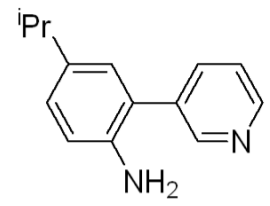

<sup>13</sup>C NMR (100 MHz, CDCl<sub>3</sub>)

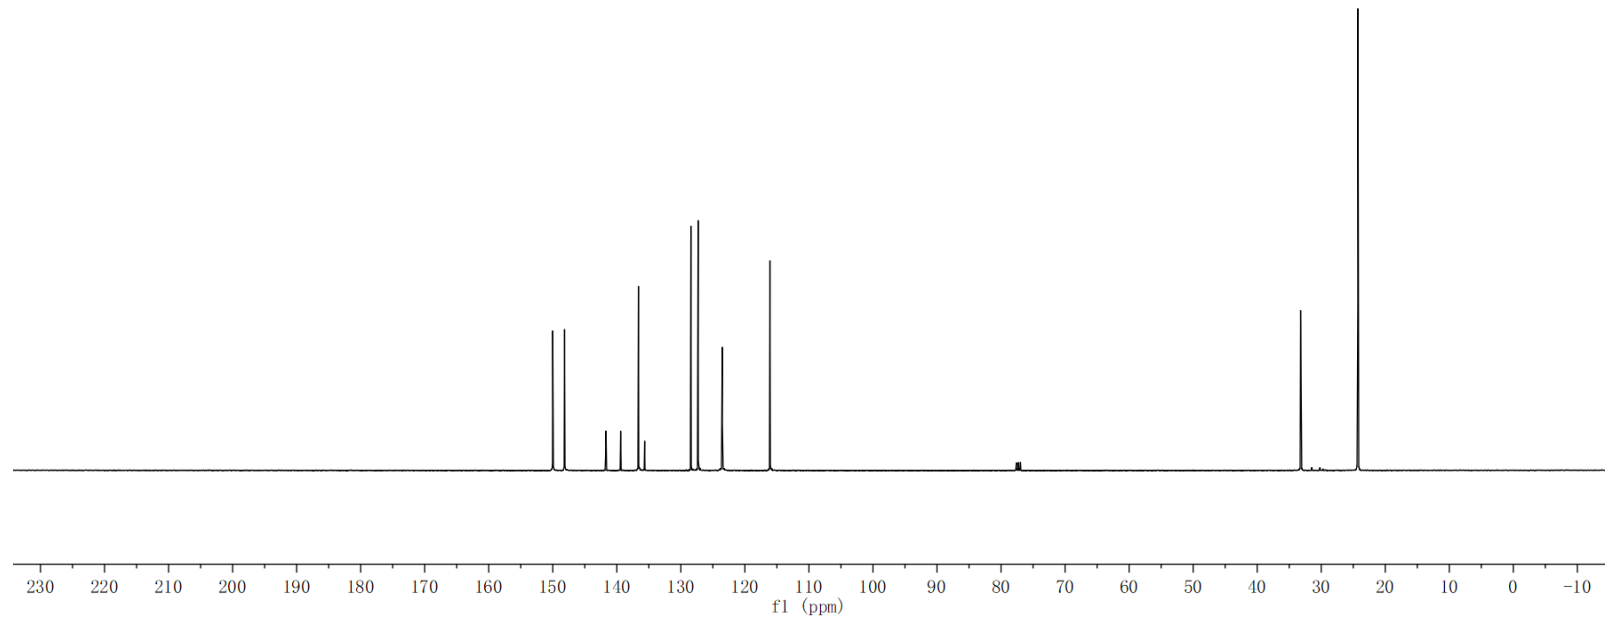

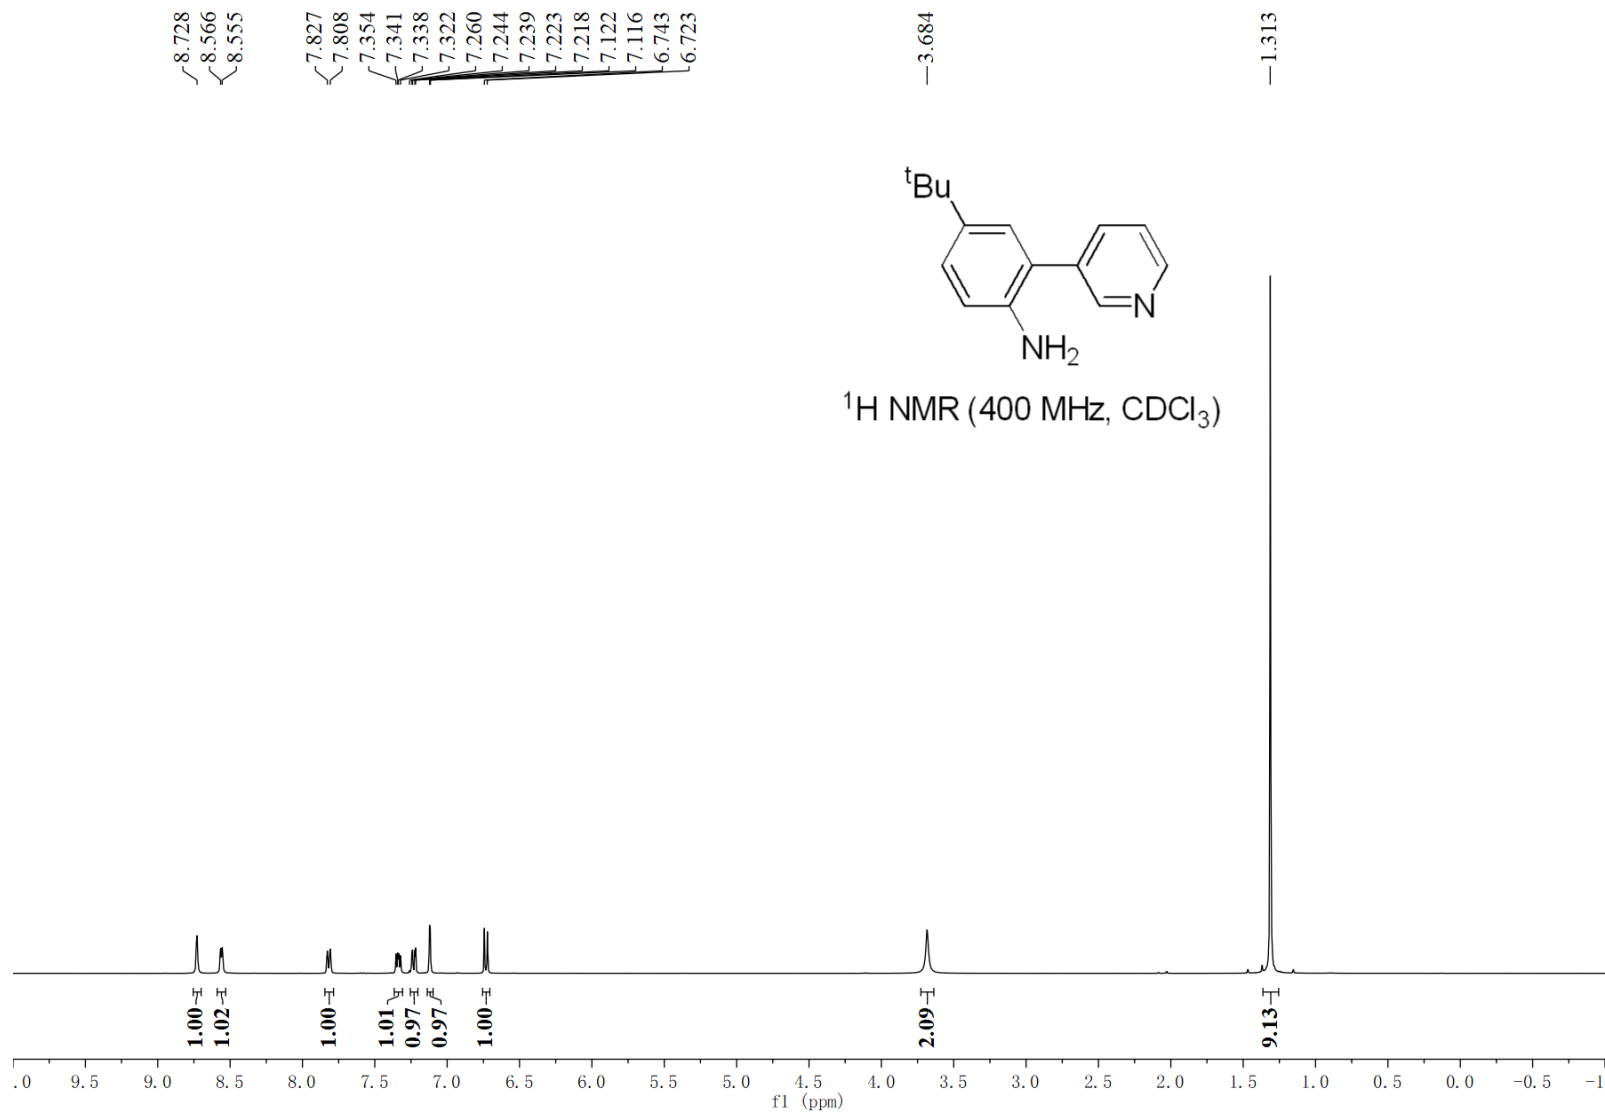

150.082  
148.158  
141.701  
141.381  
136.610  
135.864  
127.309  
126.327  
123.495  
123.279  
115.829

33.973  
31.548

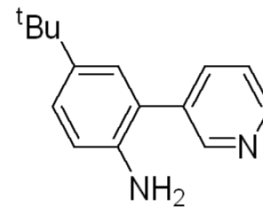

<sup>13</sup>C NMR (100 MHz, CDCl<sub>3</sub>)

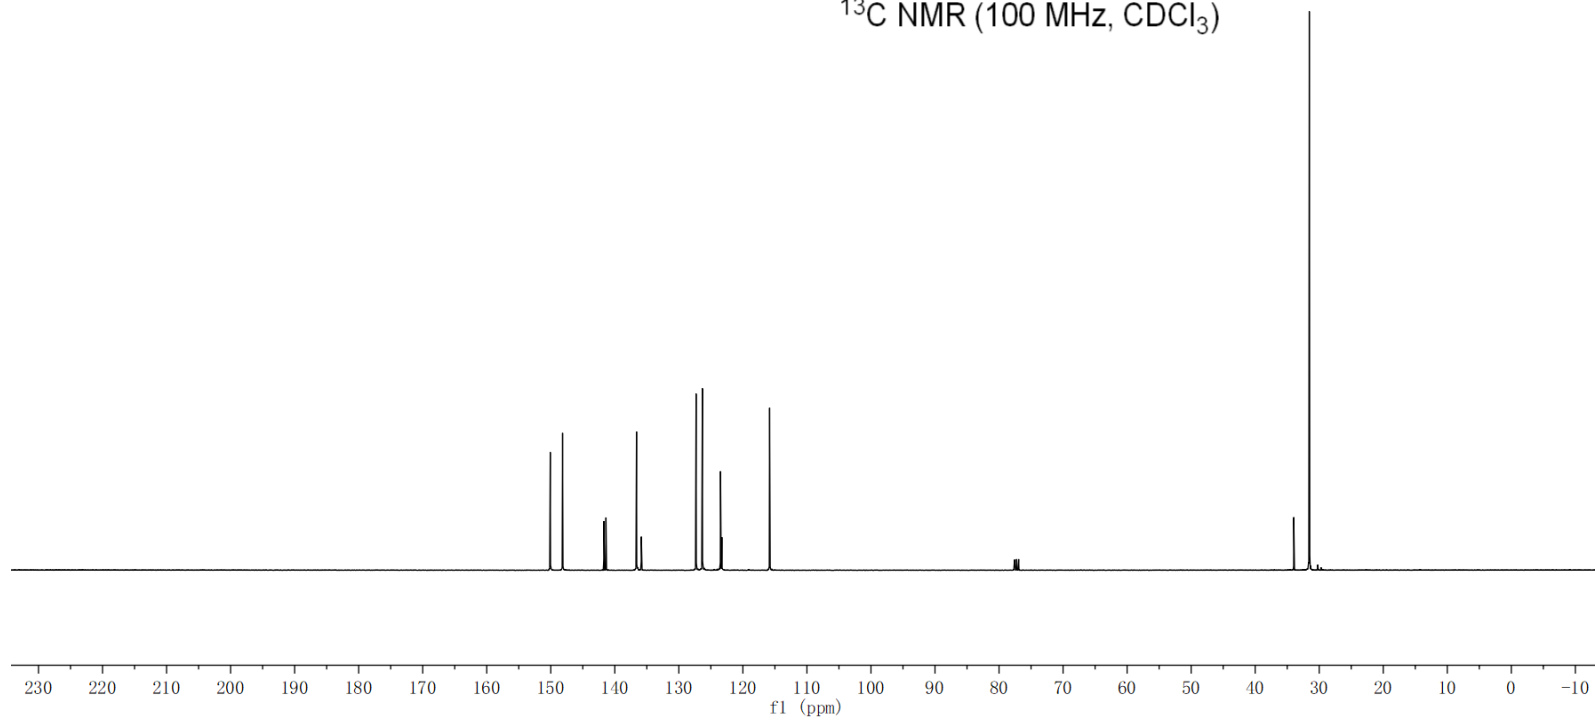

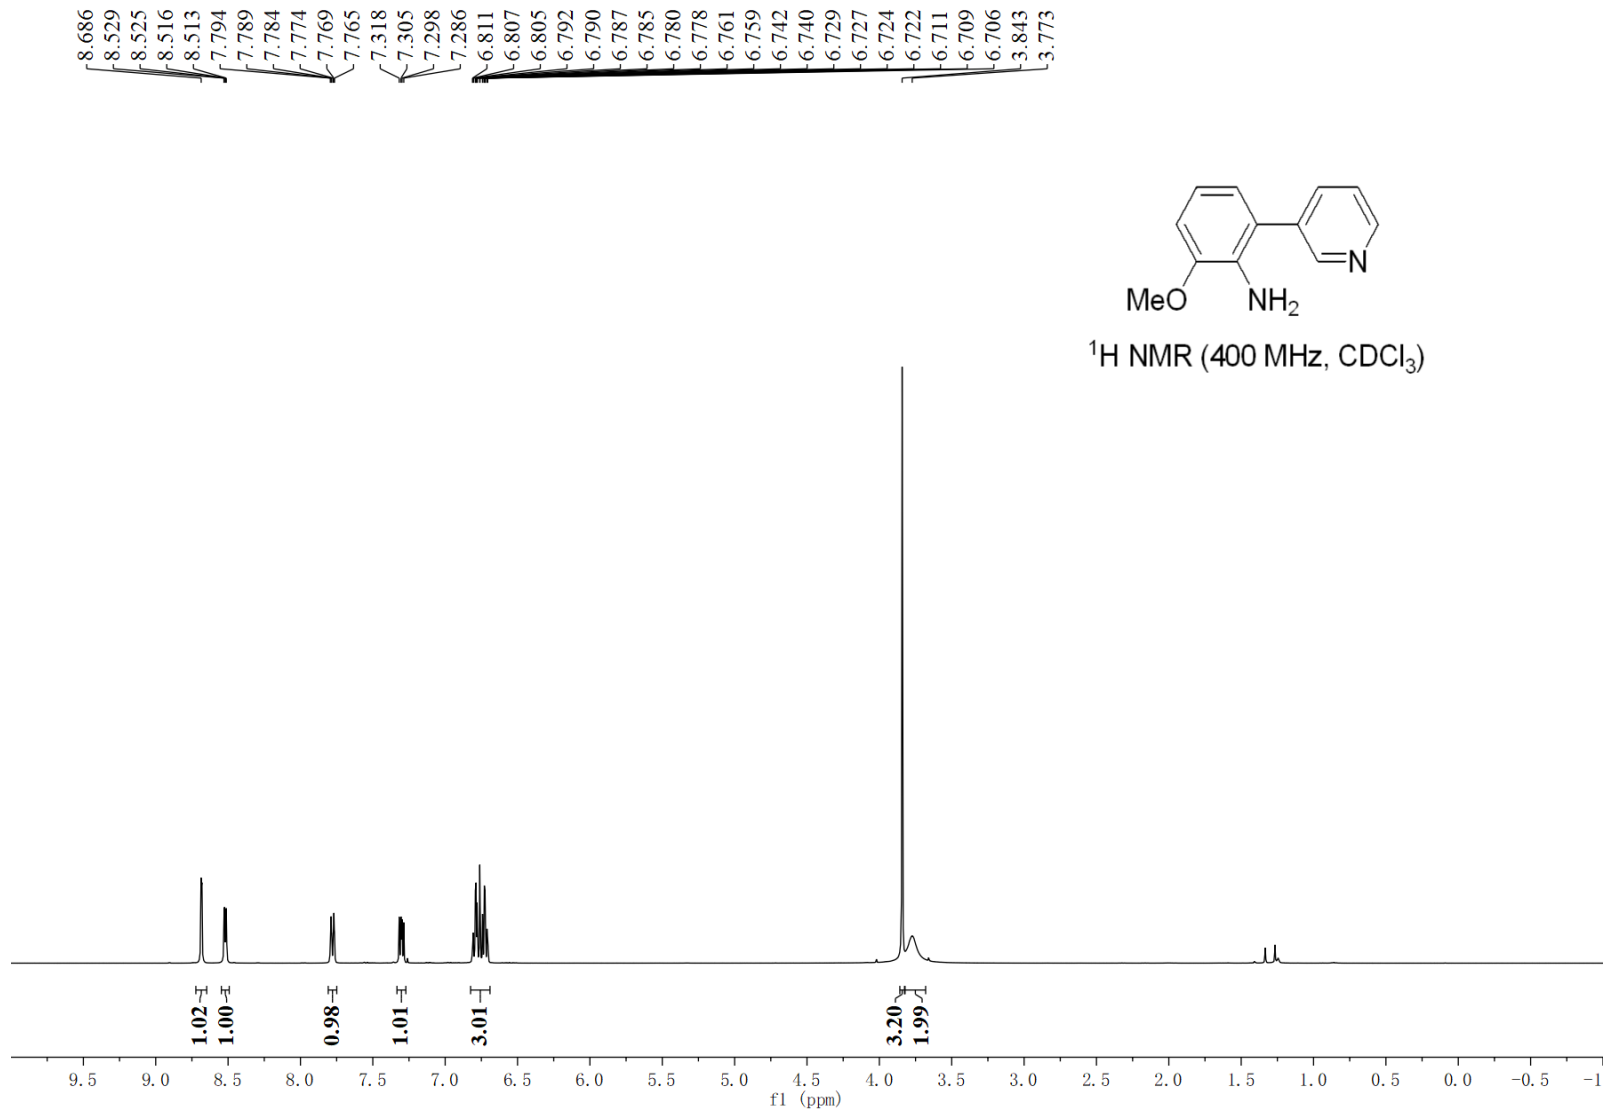

149.947  
148.219  
147.267  
136.452  
135.197  
133.913  
123.477  
123.460  
122.381  
117.885  
109.945

55.663

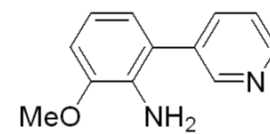

<sup>13</sup>C NMR (100 MHz, CDCl<sub>3</sub>)

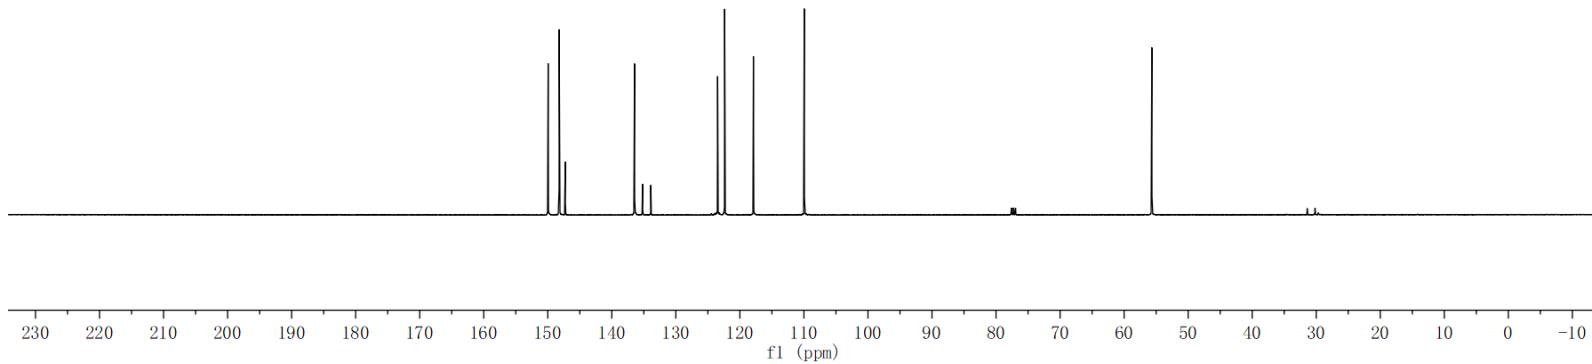



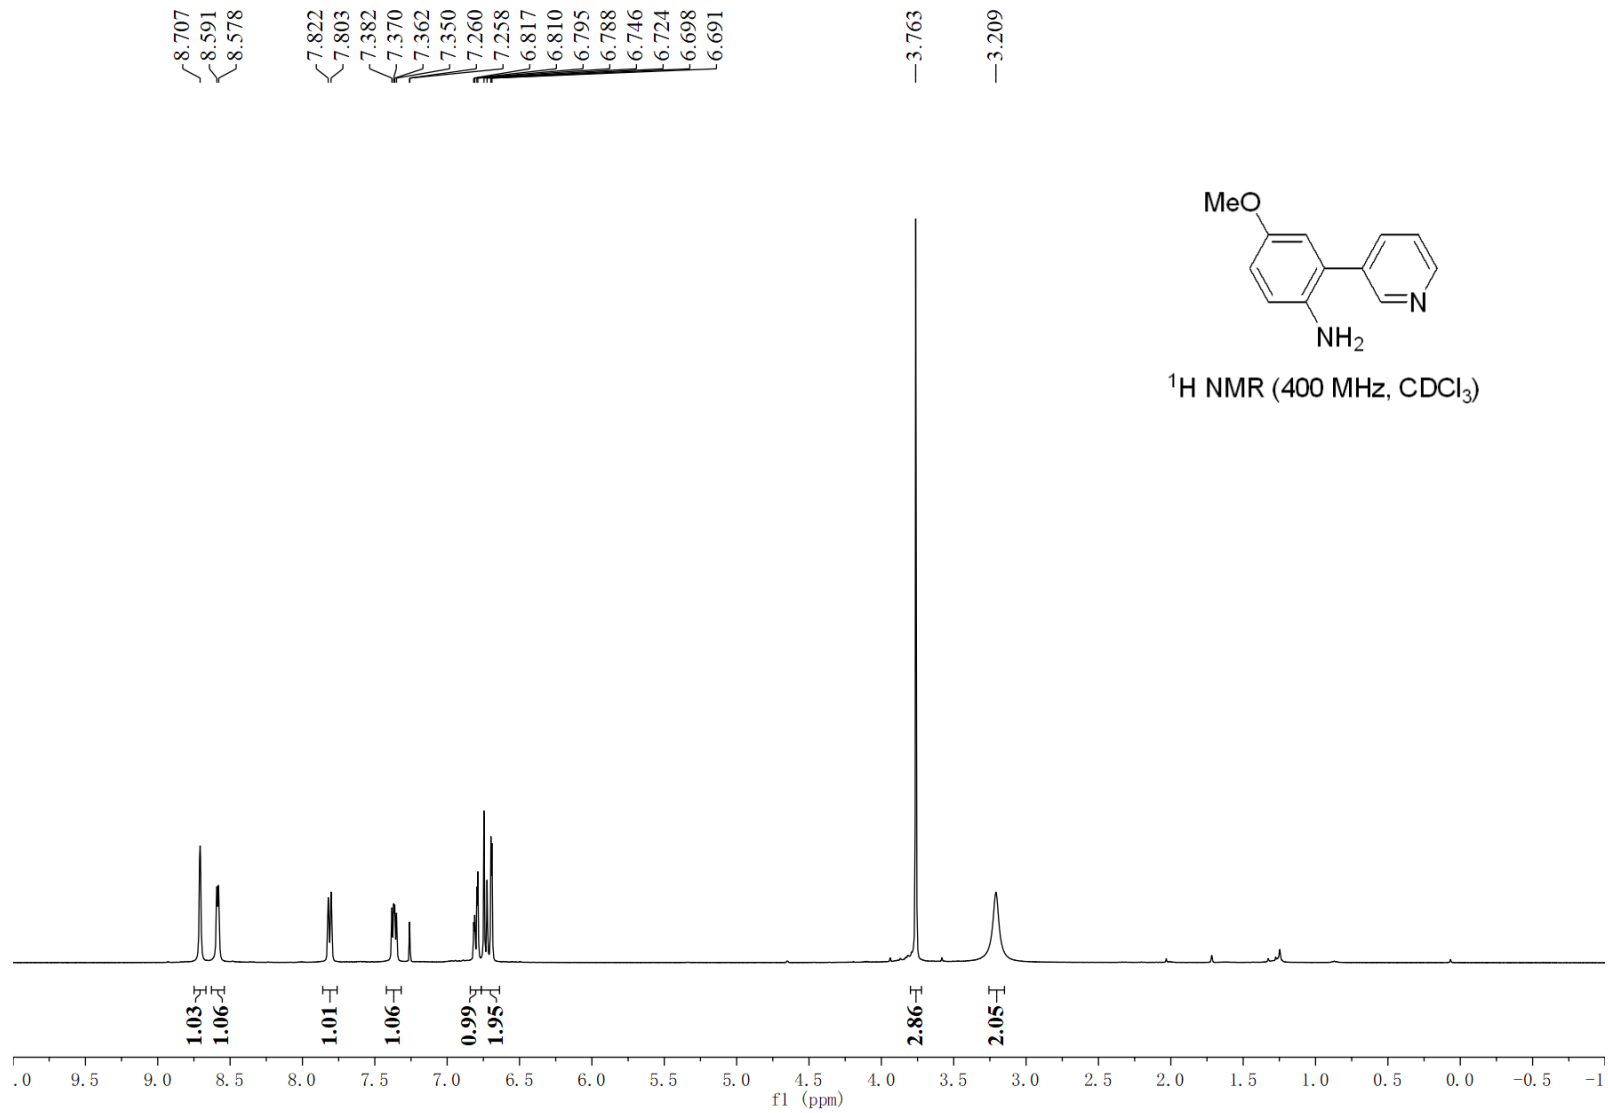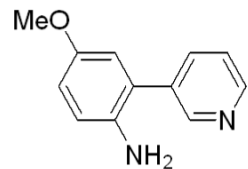

152.898  
149.896  
148.401  
137.346  
136.558  
135.267  
124.782  
123.516  
117.275  
115.739  
115.269

55.805

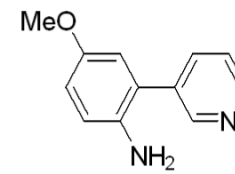

<sup>13</sup>C NMR (100 MHz, CDCl<sub>3</sub>)

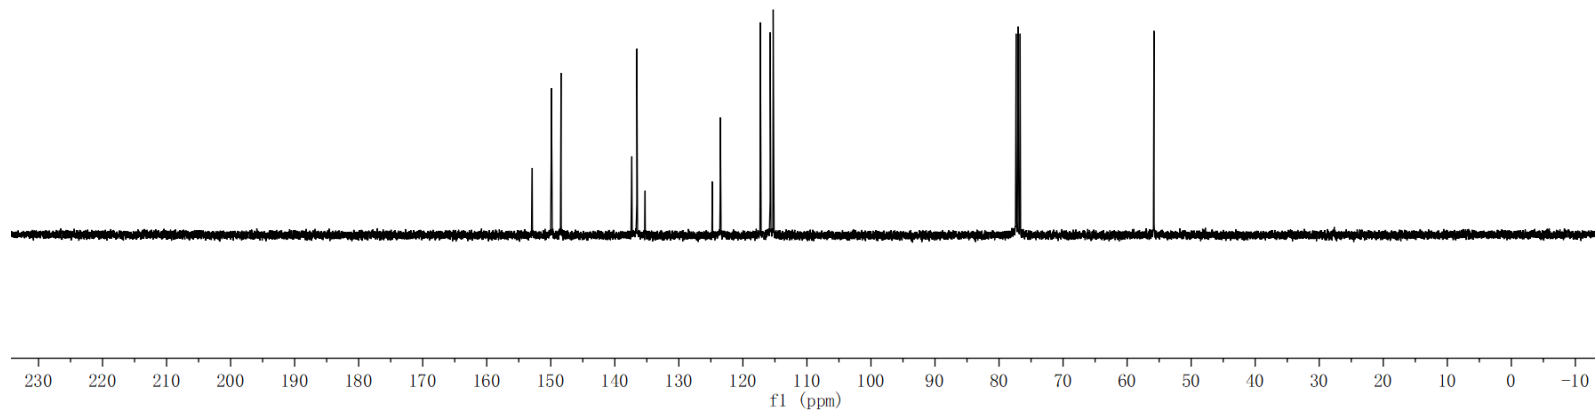

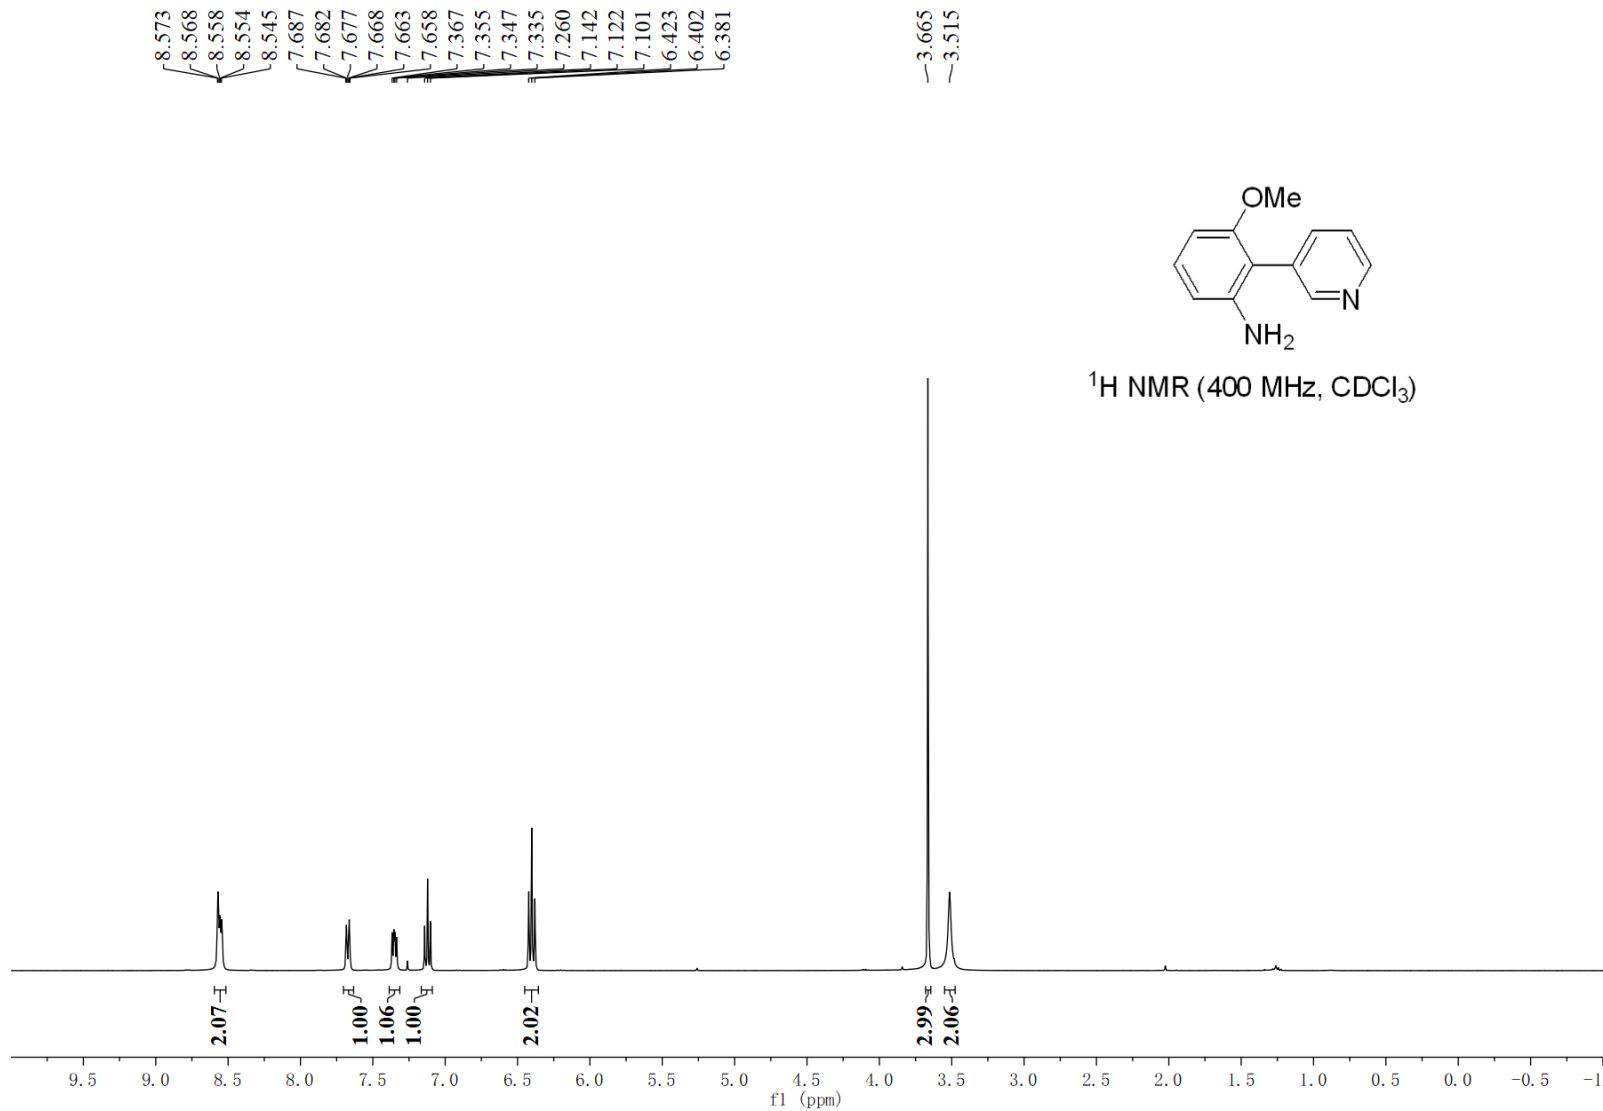

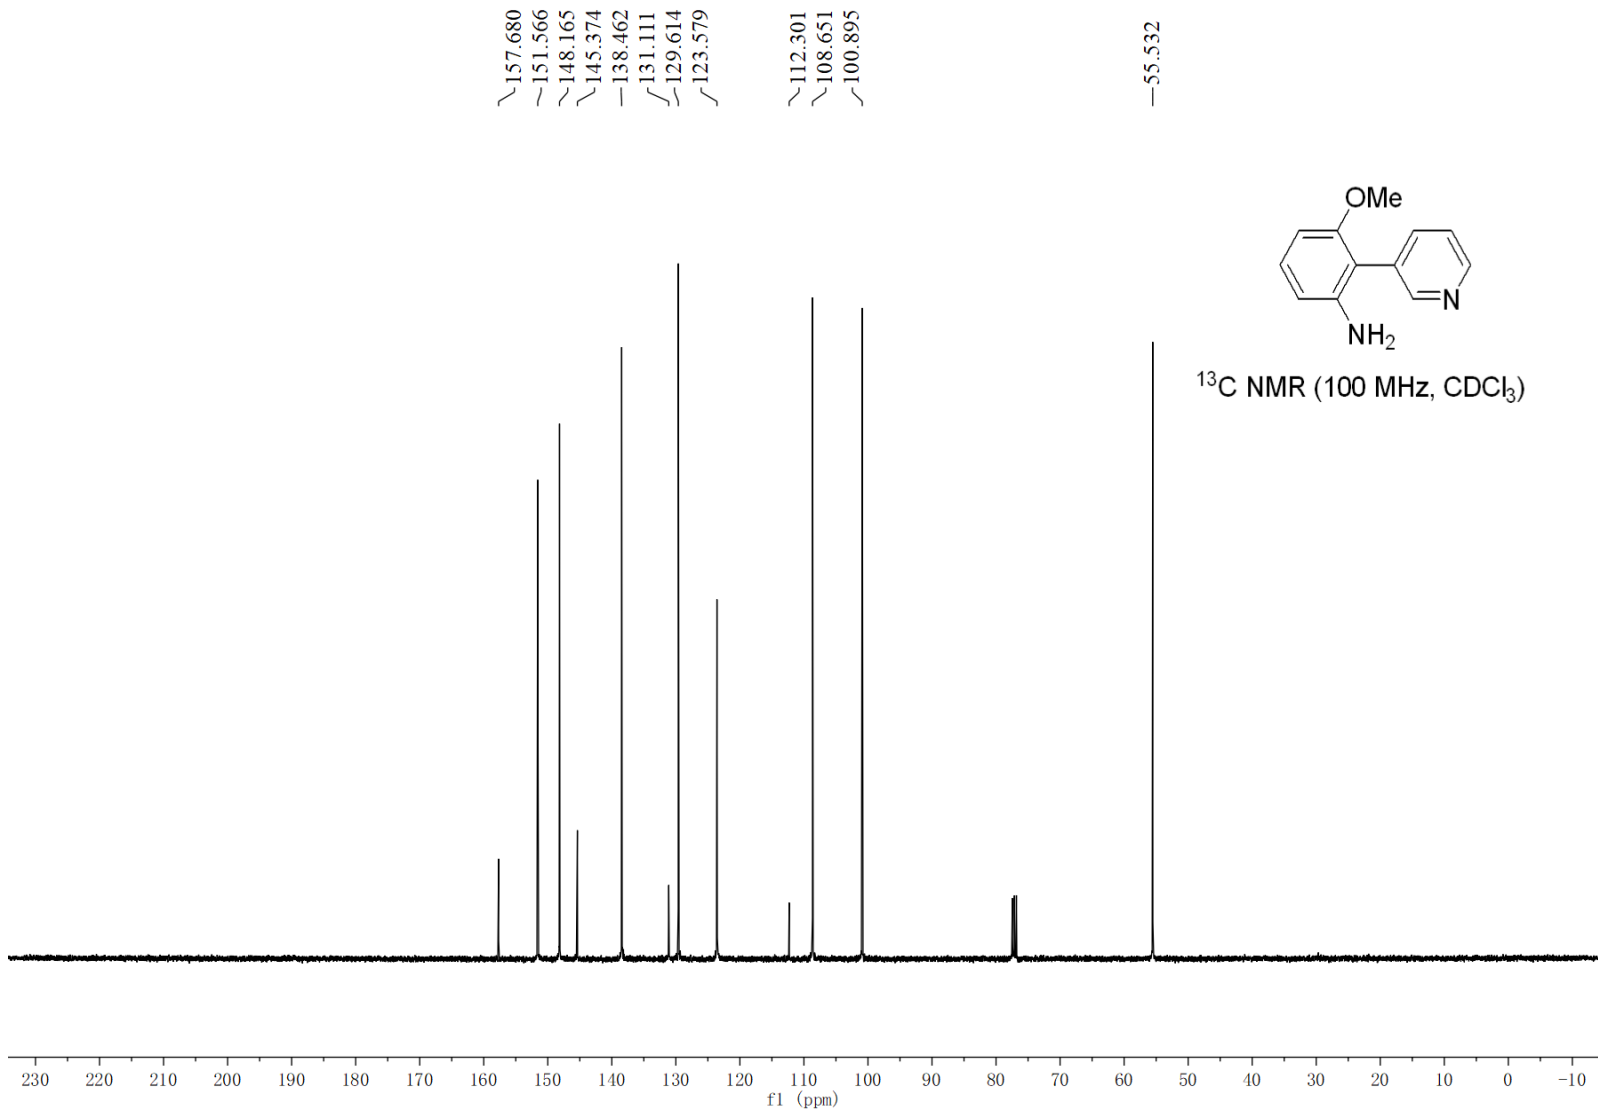

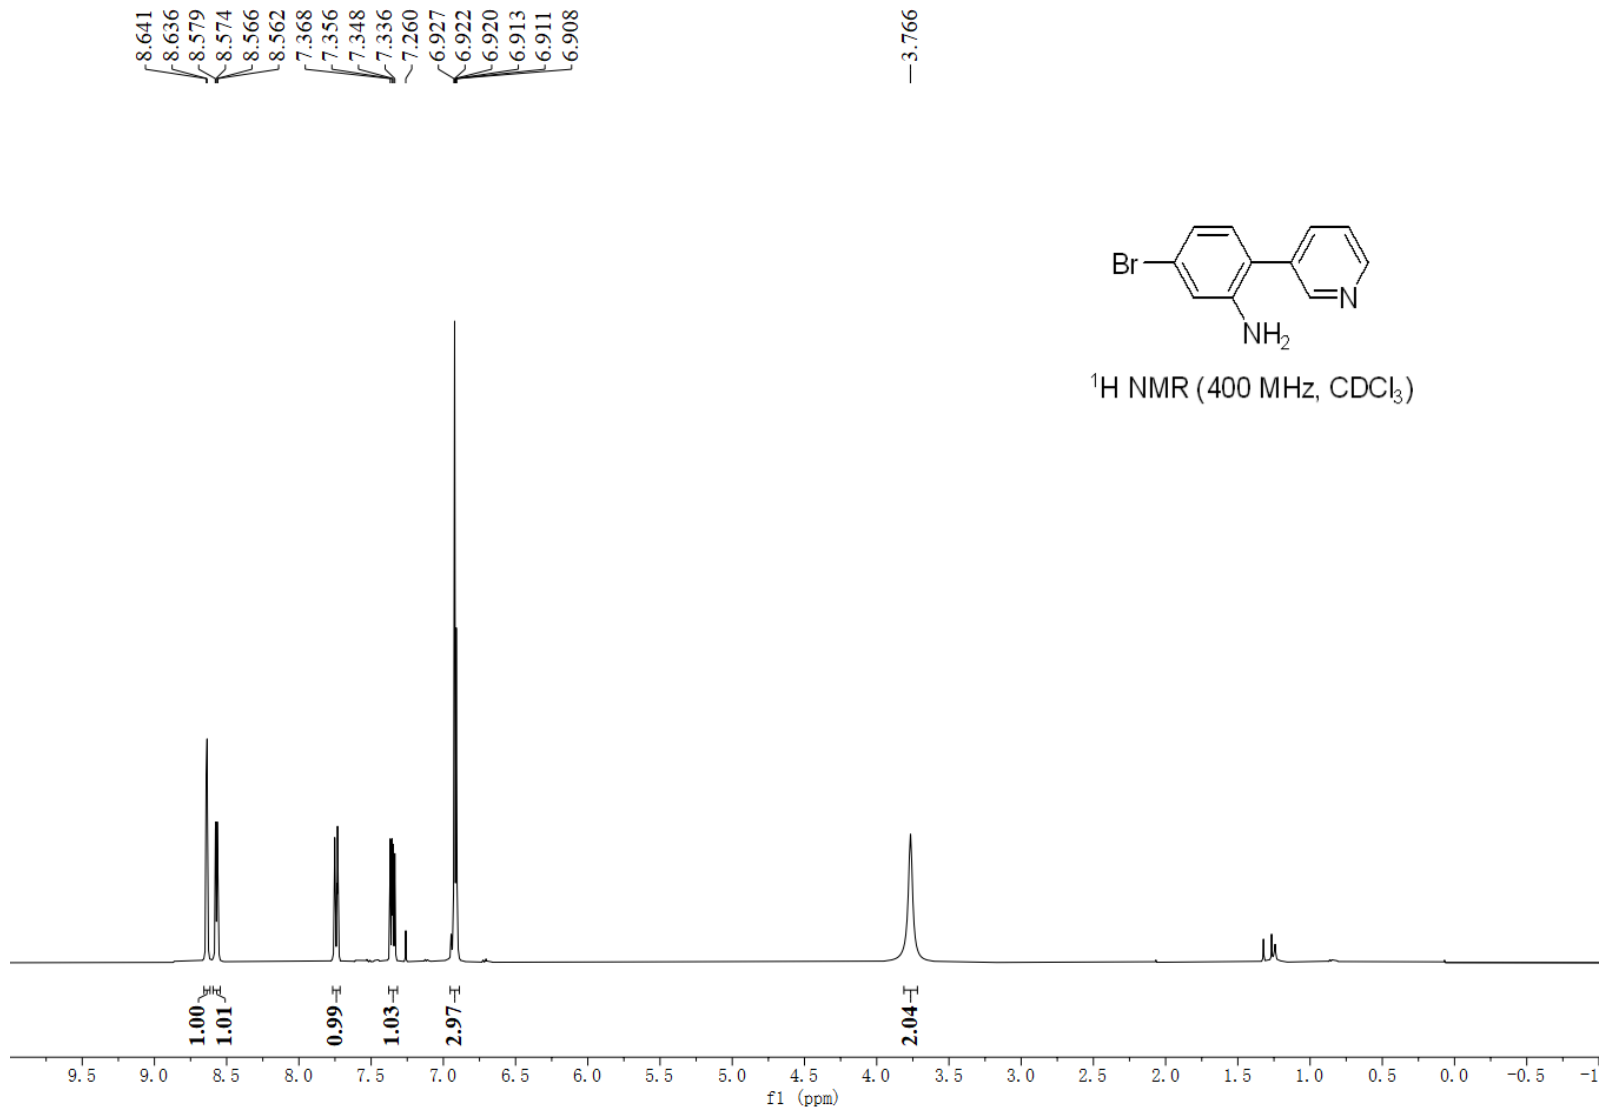

149.772  
148.661  
145.125  
136.478  
134.309  
131.773  
123.673  
122.982  
122.439  
121.688  
118.319

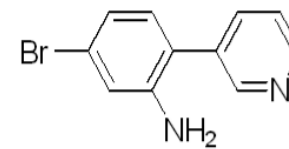

$^{13}\text{C}$  NMR (101 MHz,  $\text{CDCl}_3$ )

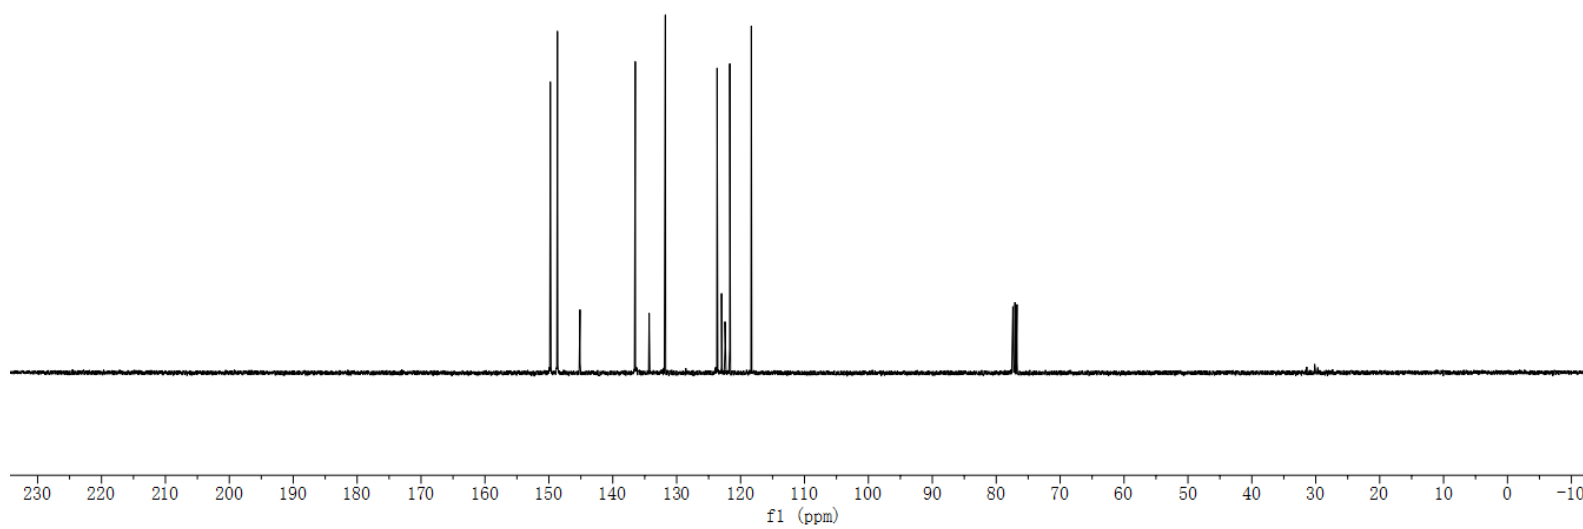

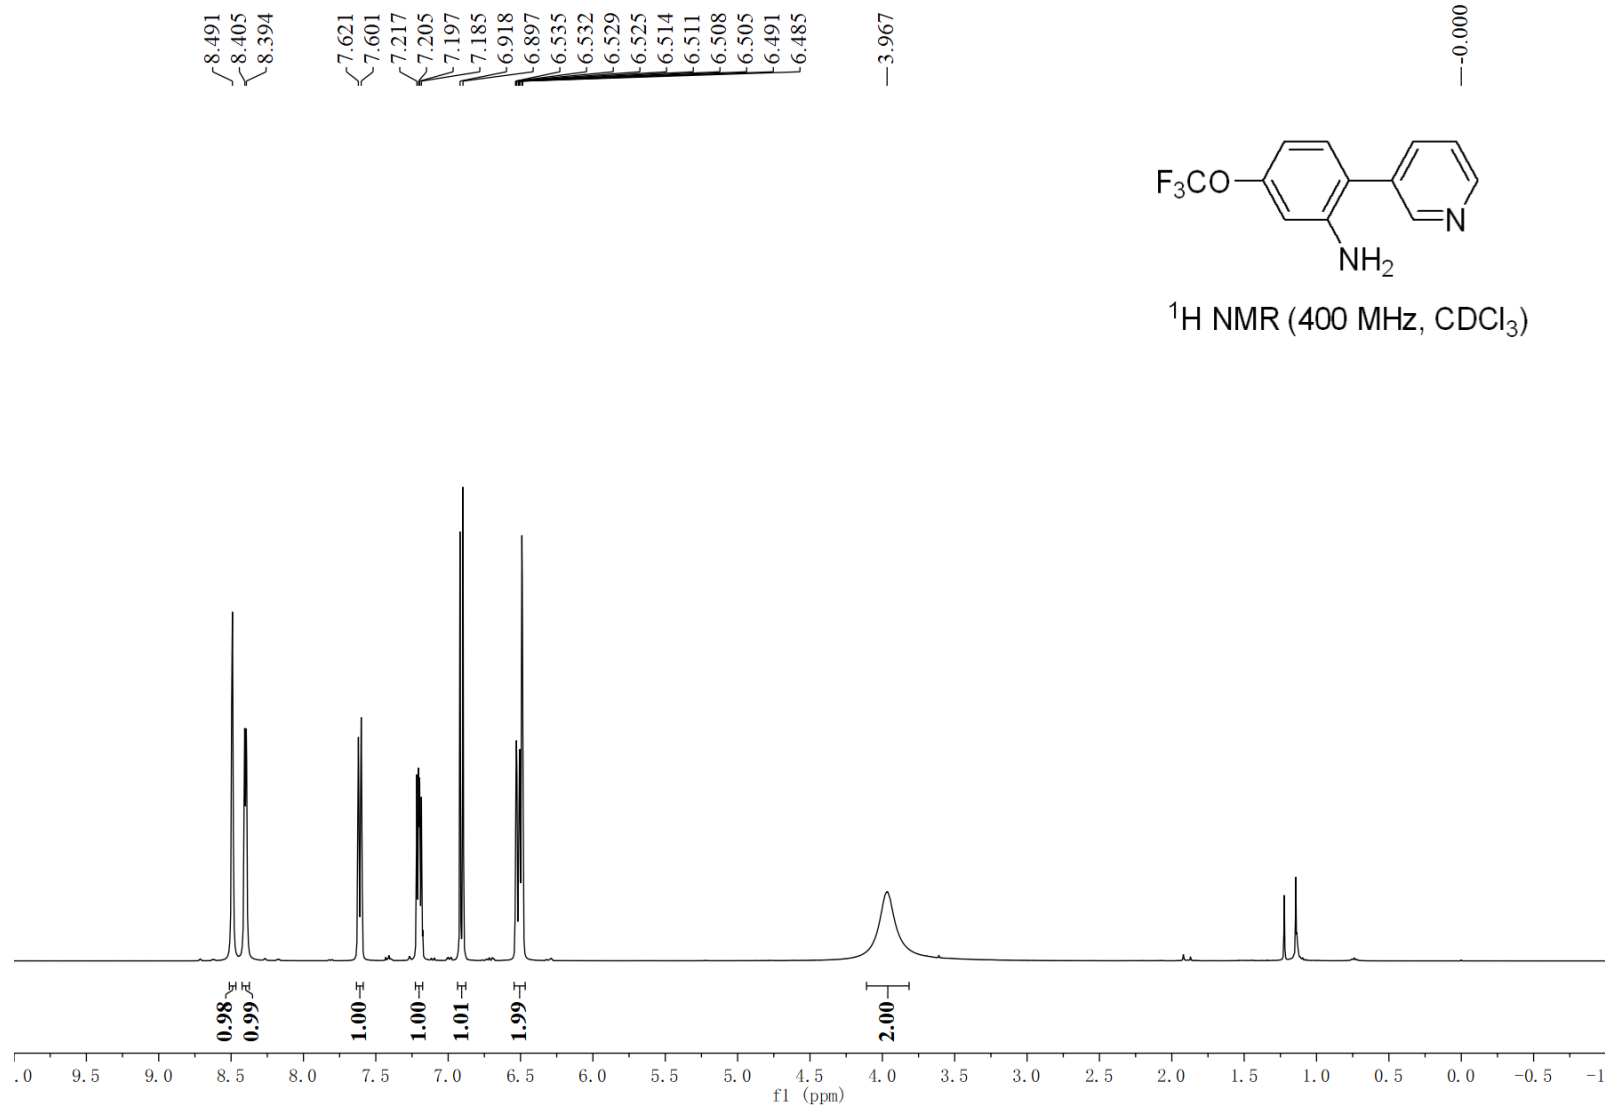

150.062  
150.044  
150.026  
150.008  
149.710  
148.465  
145.529  
136.527  
134.235  
131.532  
123.630  
121.889  
121.699  
119.145  
110.296  
107.580

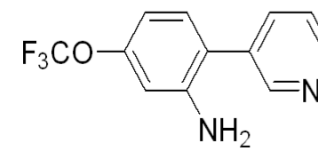

<sup>13</sup>C NMR (100 MHz, CDCl<sub>3</sub>)

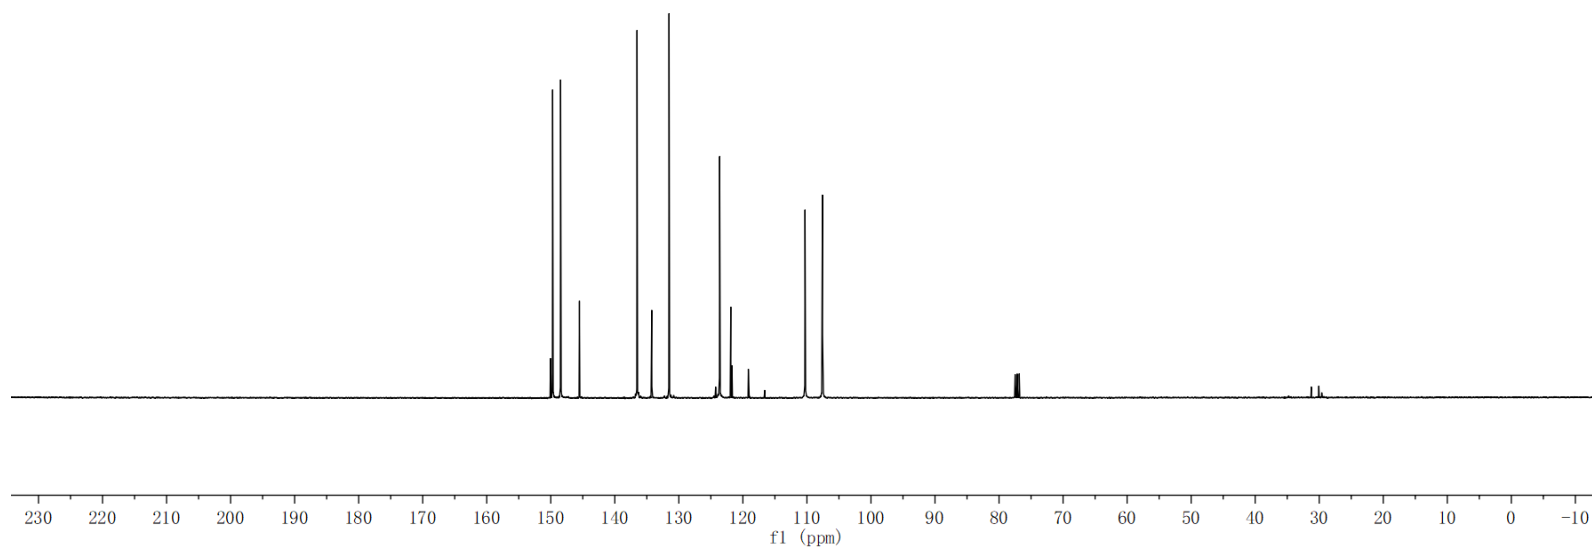



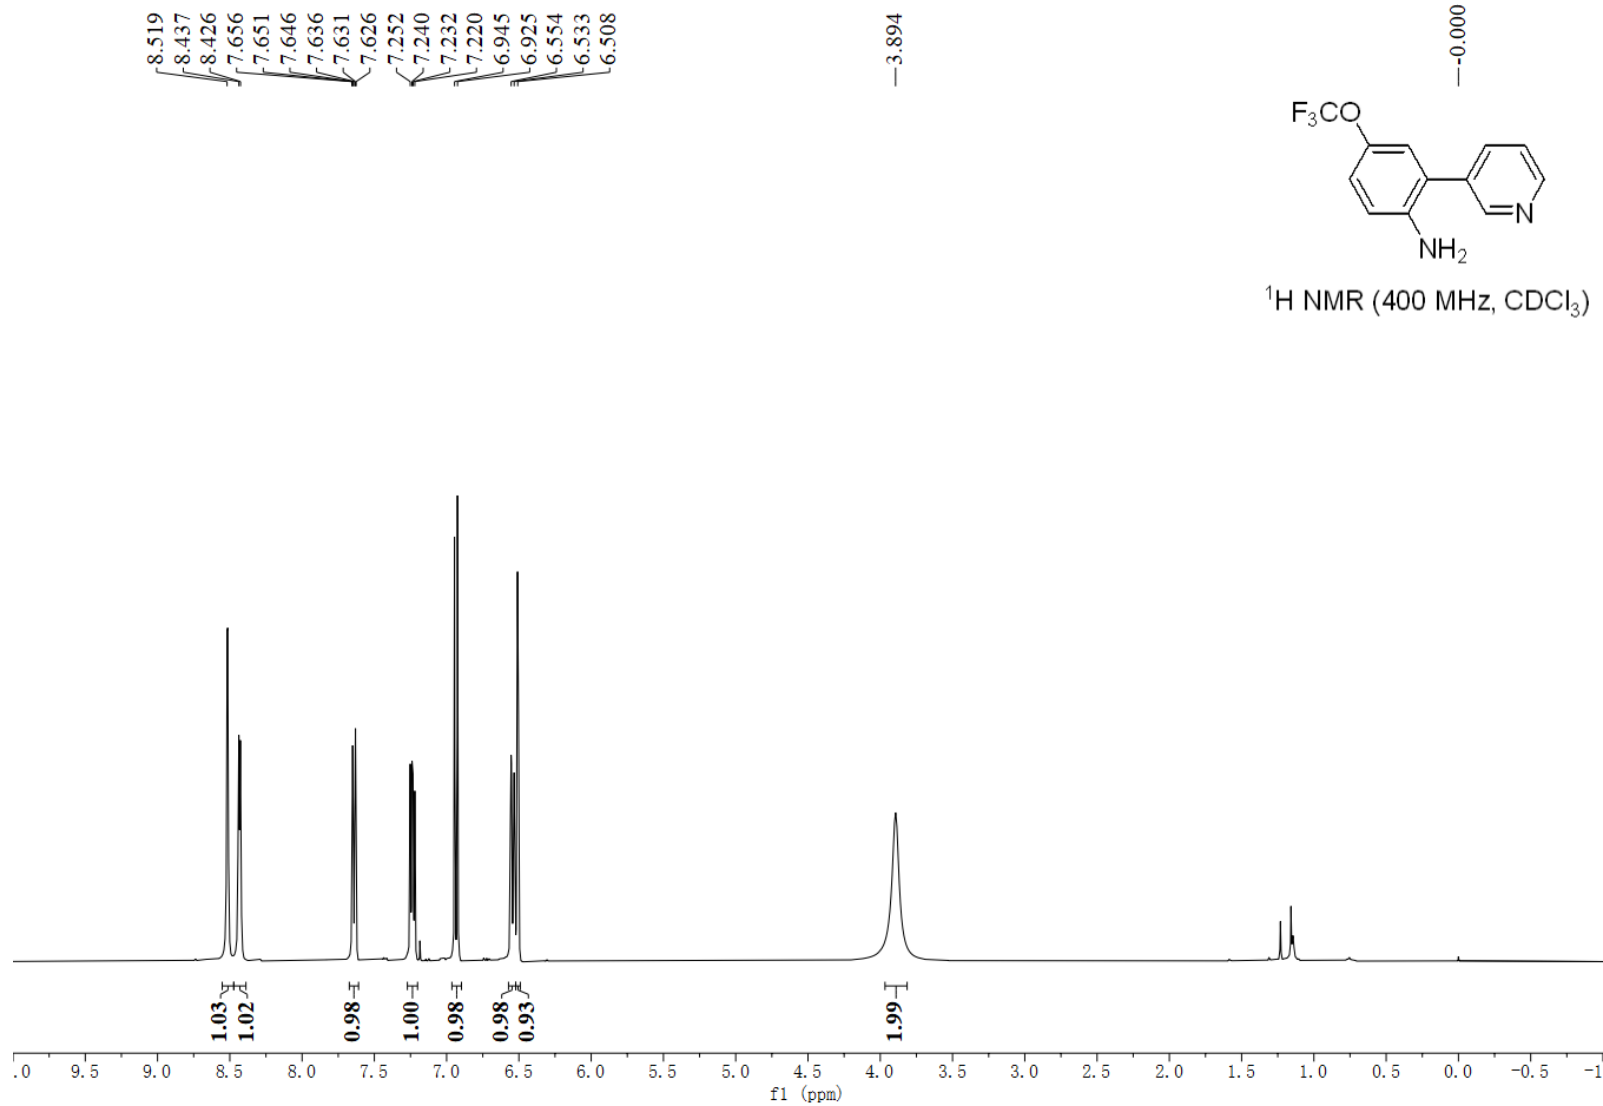

150.036  
150.017  
149.999  
149.981  
149.729  
148.517  
145.457  
136.592  
134.208  
131.567  
123.687  
121.886  
121.687  
119.131  
110.395  
107.628

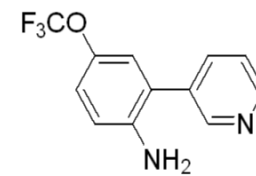

$^{13}\text{C}$  NMR (100 MHz,  $\text{CDCl}_3$ )

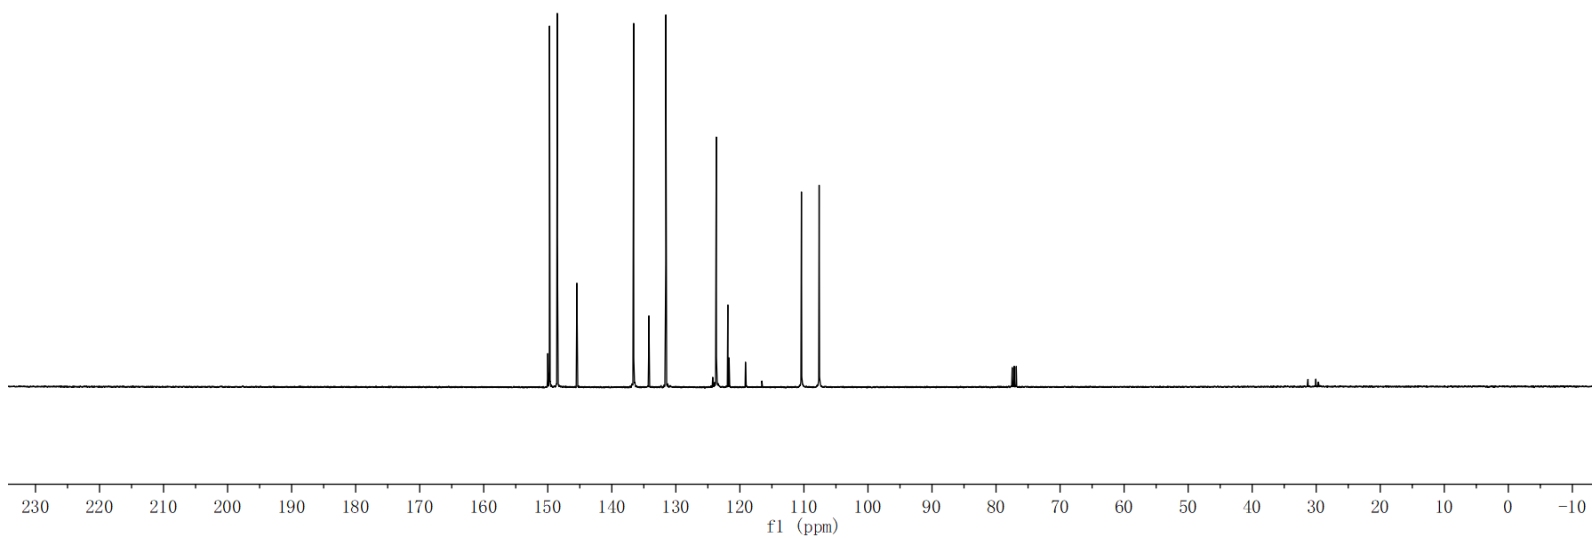

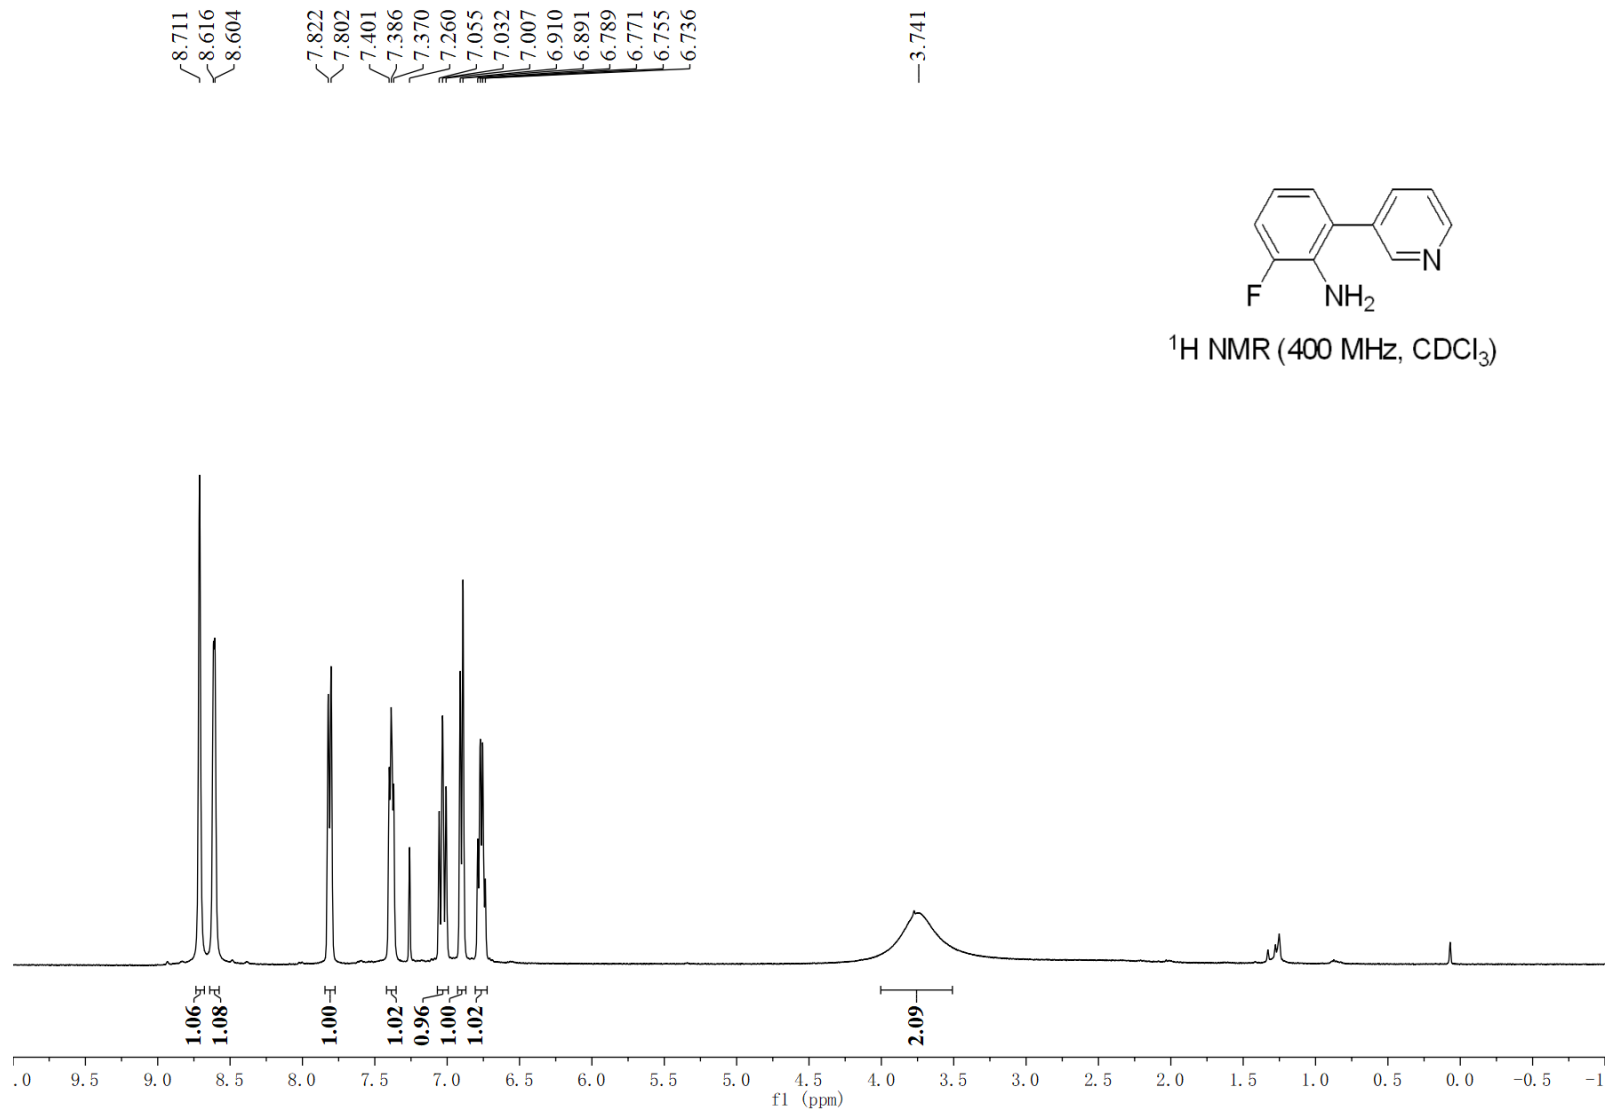

152.935  
150.560  
149.786  
148.720  
136.415  
134.186  
132.575  
132.446  
125.625  
125.594  
123.622  
118.101  
118.022  
114.968  
114.778

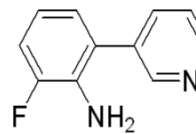

<sup>13</sup>C NMR (100 MHz, CDCl<sub>3</sub>)

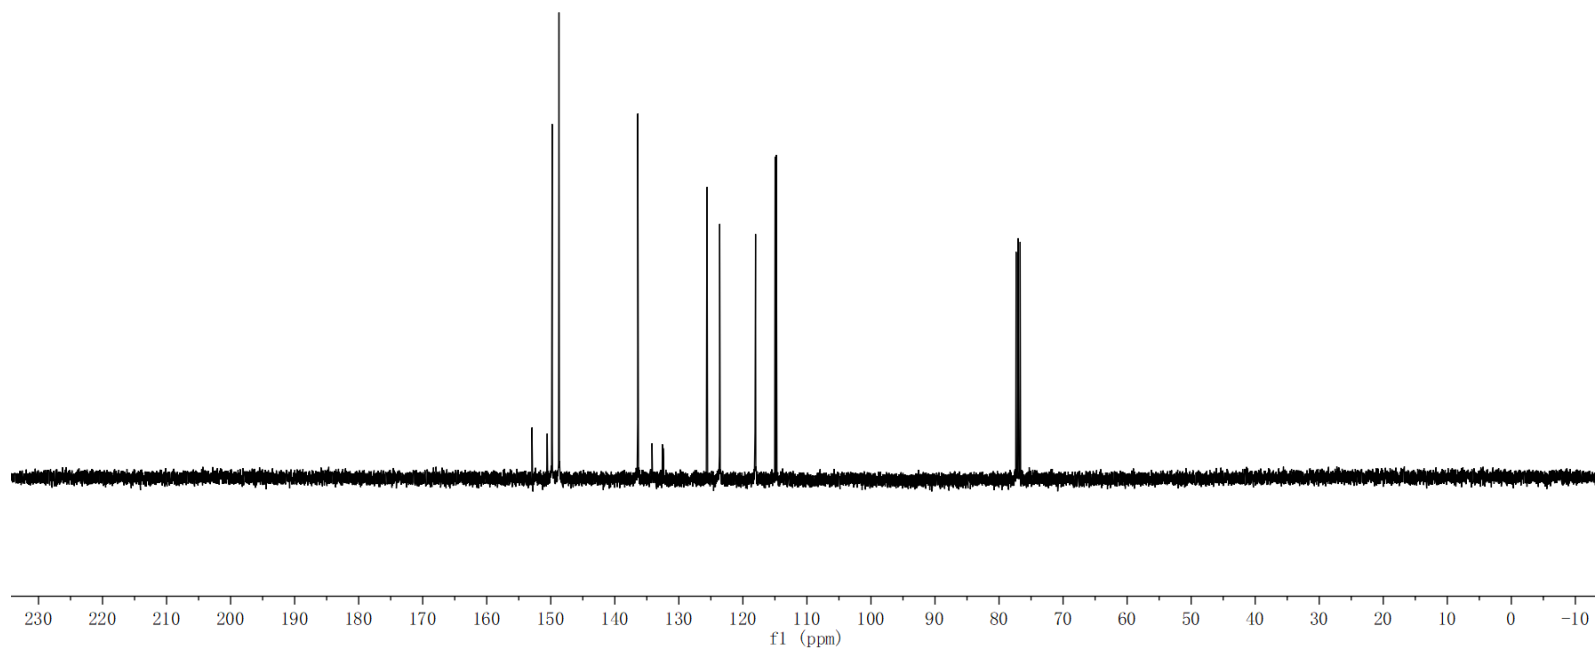

-134.012  
-134.025  
-134.041  
-134.054

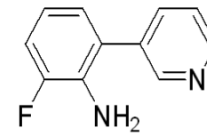

<sup>19</sup>F NMR (301 MHz, CDCl<sub>3</sub>)

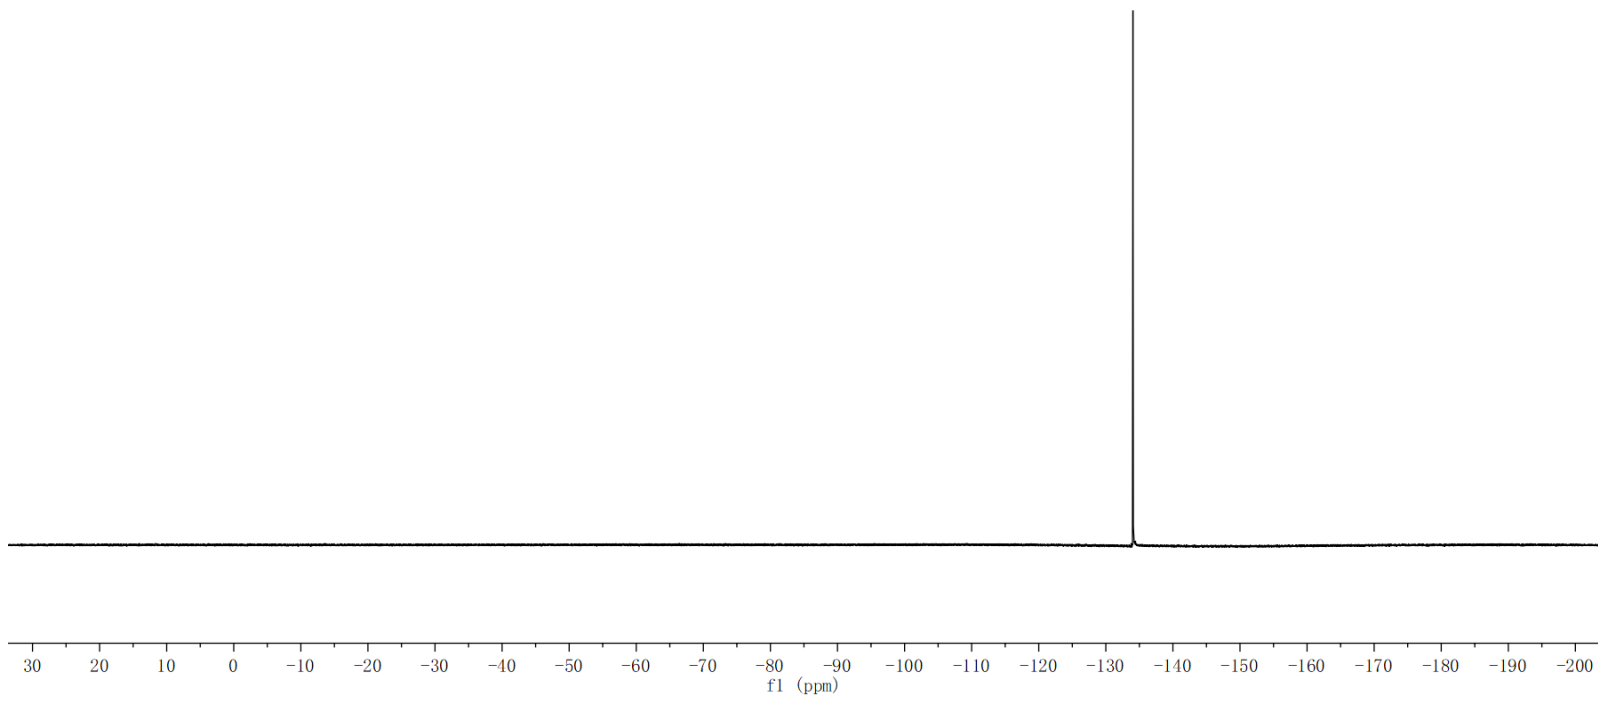

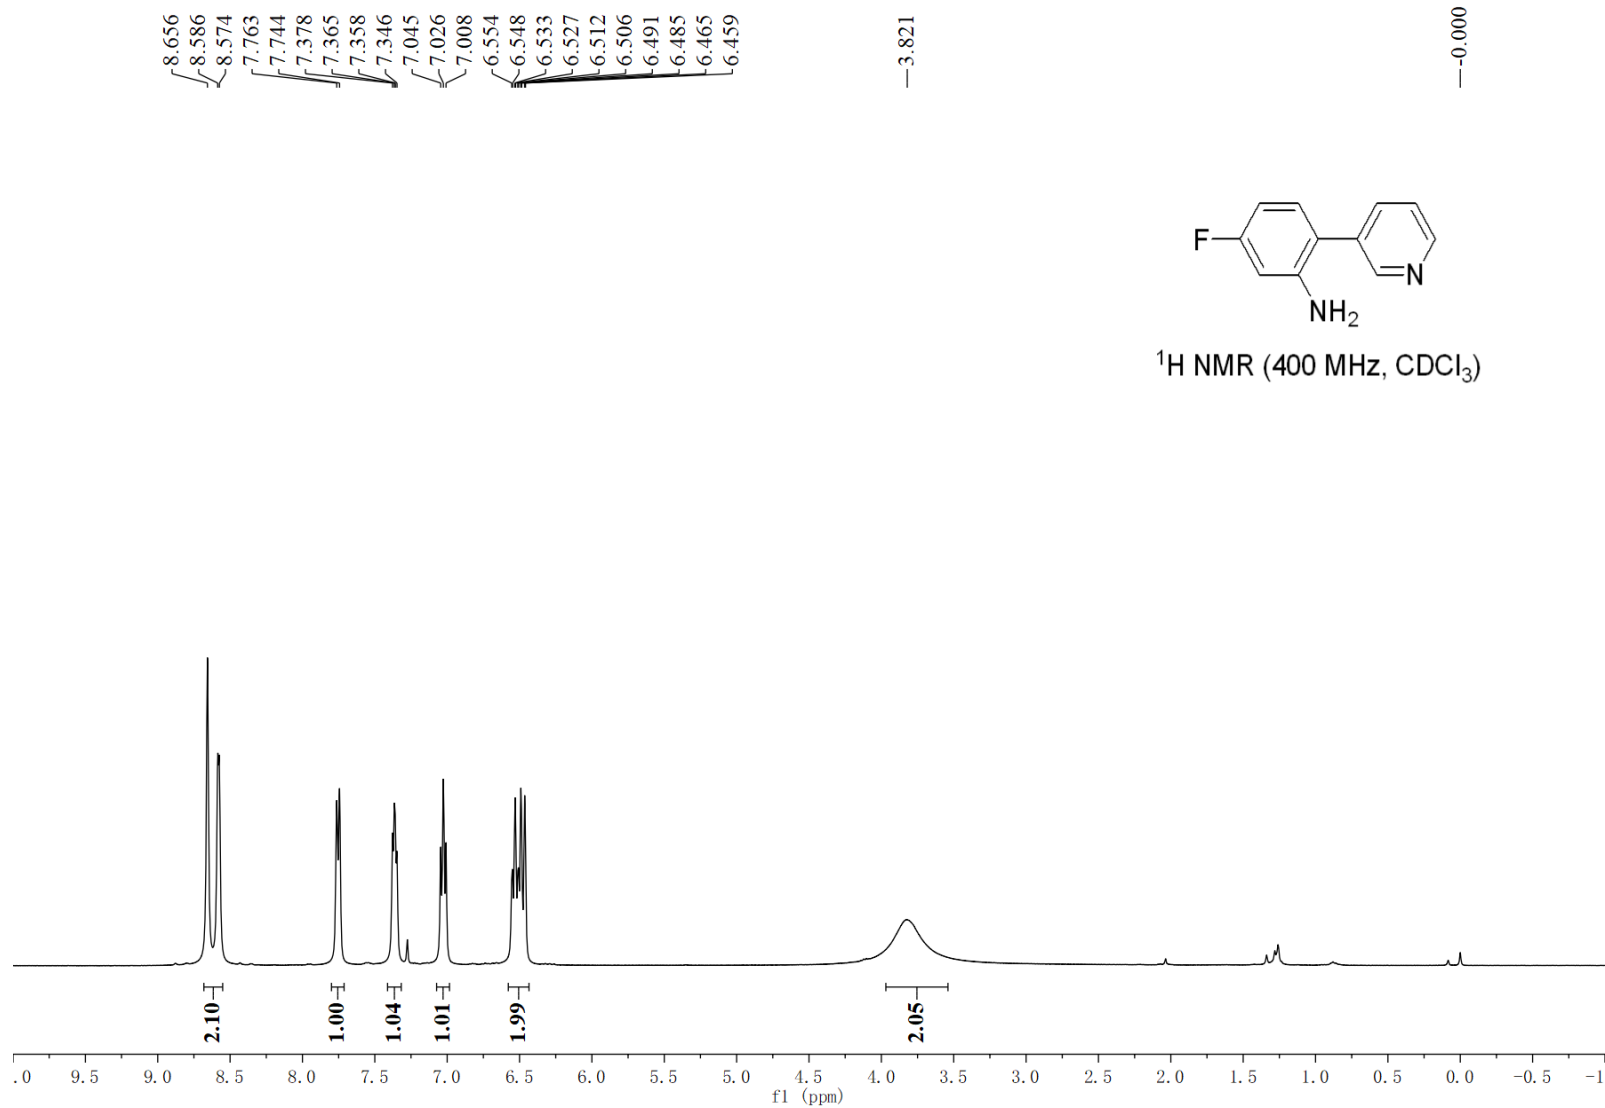

164.822  
162.386  
150.060  
148.488  
145.541  
145.431  
136.622  
134.466  
131.871  
131.770  
123.606  
105.635  
105.419  
102.442  
102.196

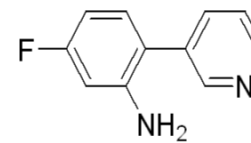

<sup>13</sup>C NMR (100 MHz, CDCl<sub>3</sub>)

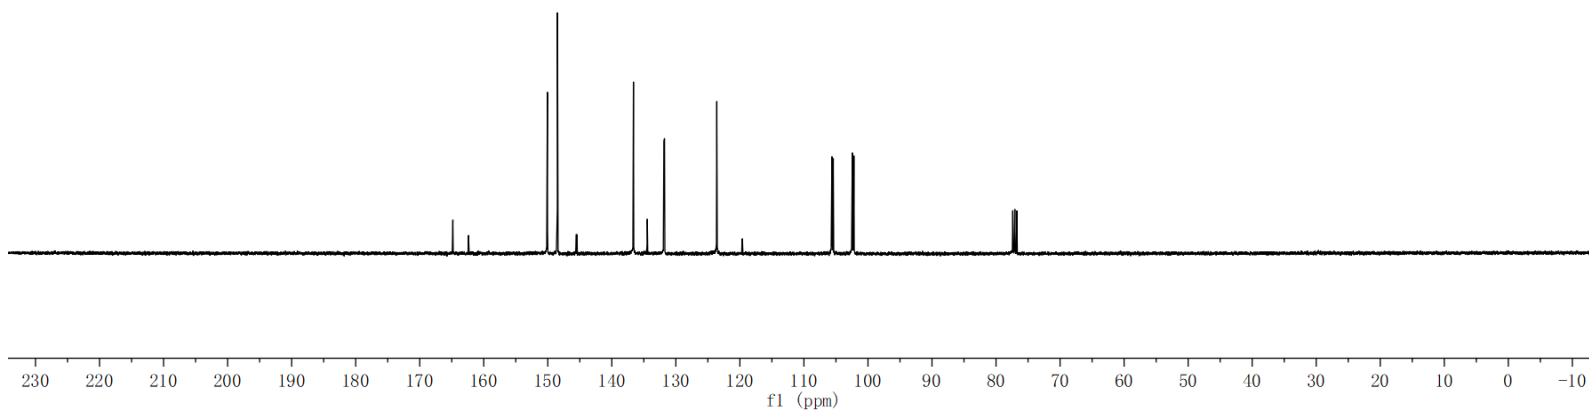

-113.215  
-113.232  
-113.237  
-113.243  
-113.253  
-113.260  
-113.282

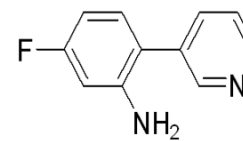

$^{19}\text{F}$  NMR (301 MHz,  $\text{CDCl}_3$ )

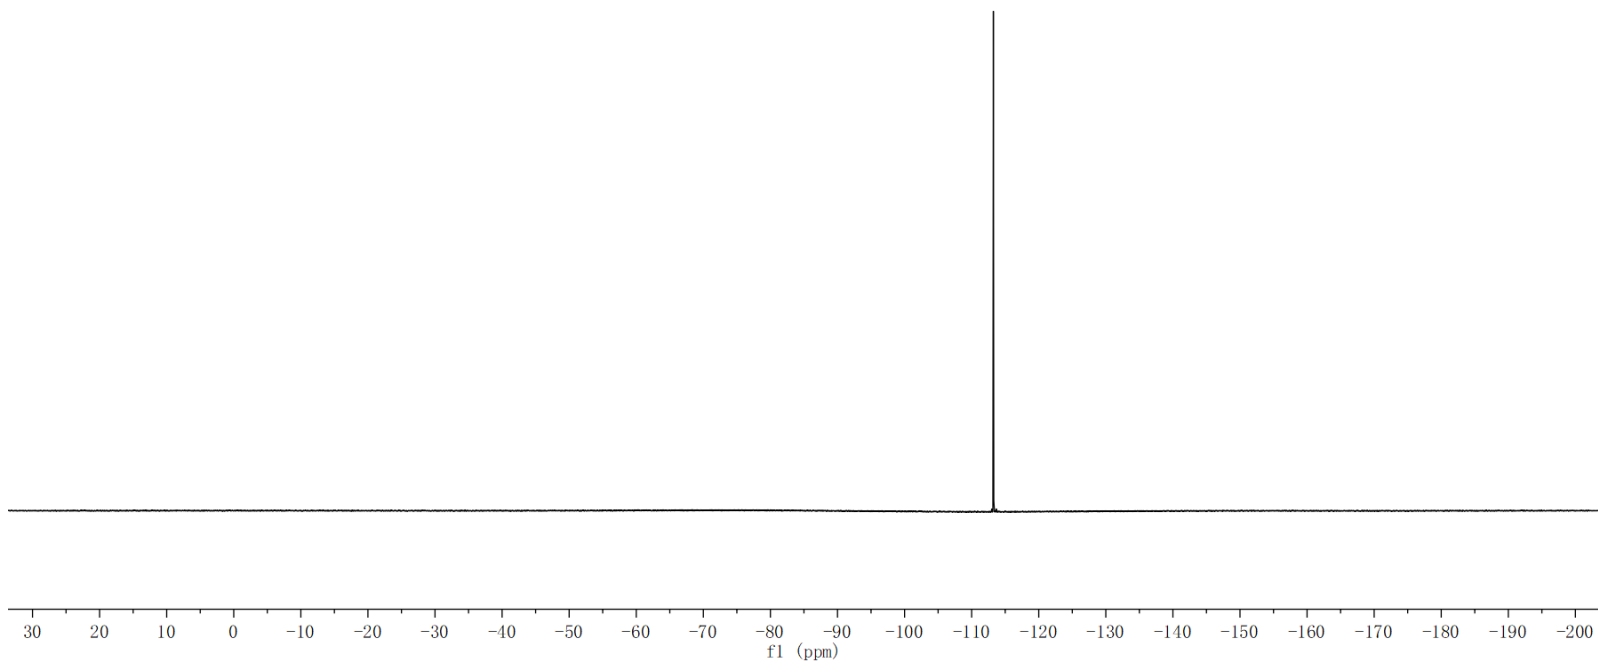



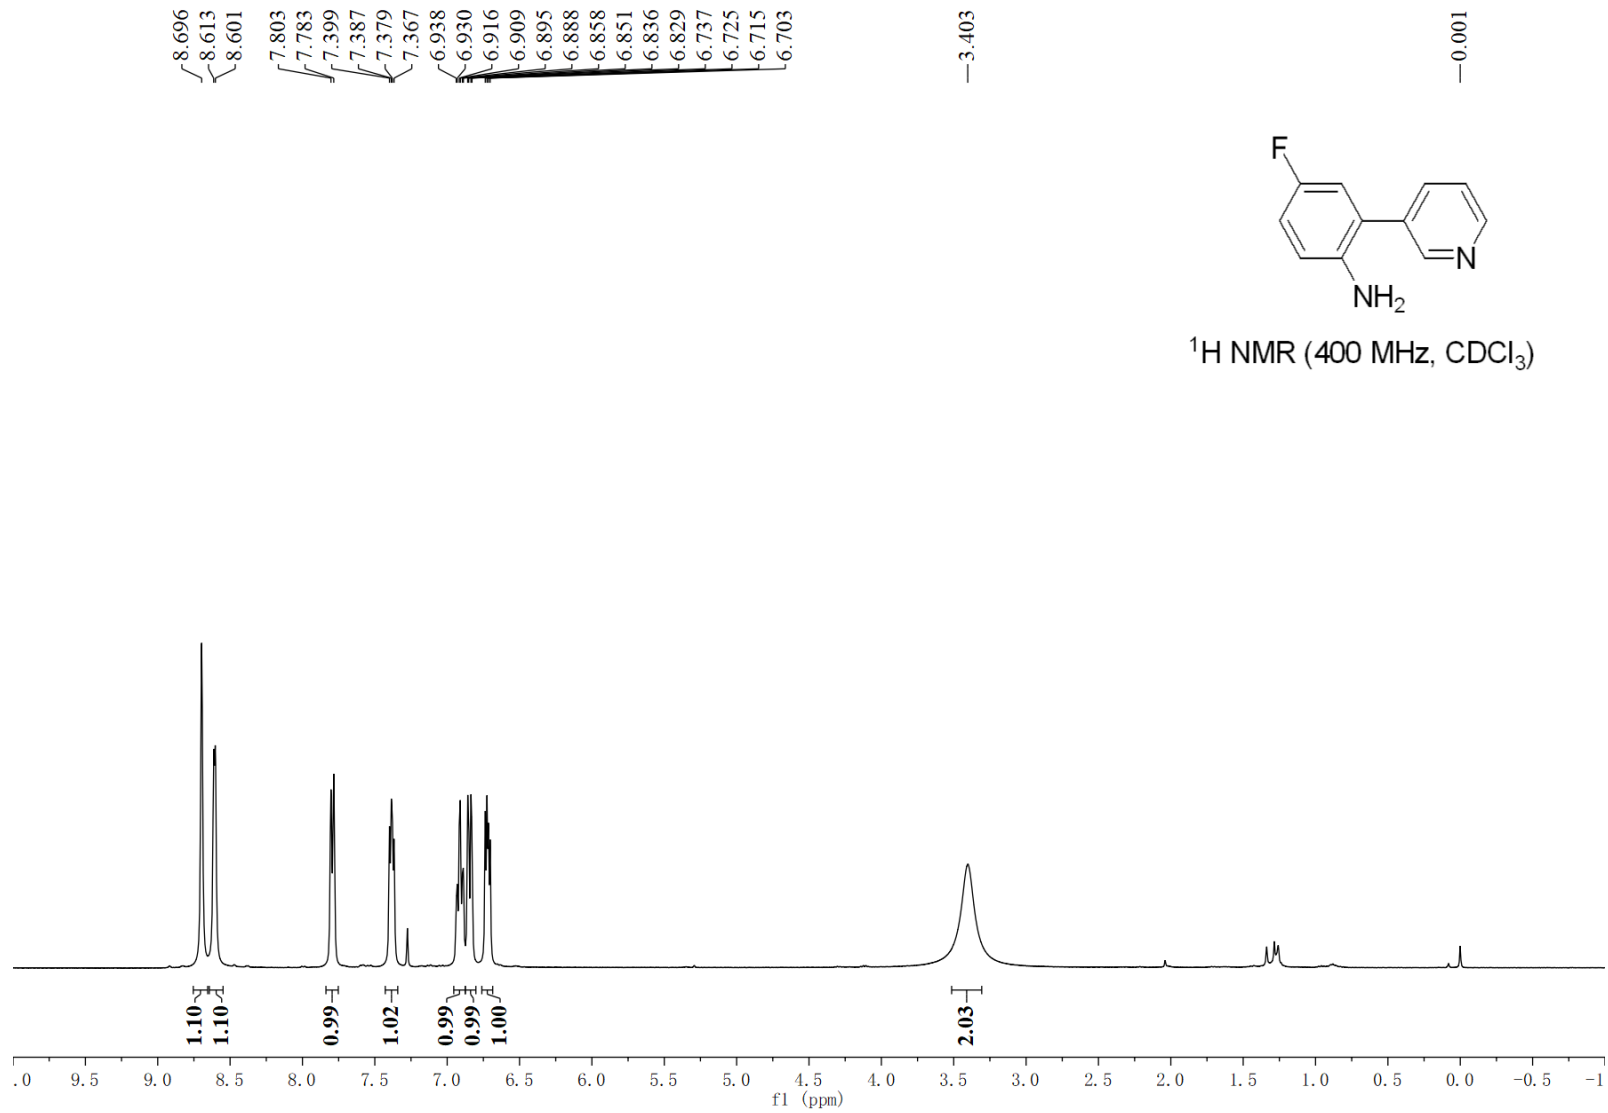

157.472  
155.116  
149.820  
148.794  
139.883  
136.430  
134.354  
124.650  
124.578  
123.614  
116.874  
116.796  
116.567  
115.939  
115.718

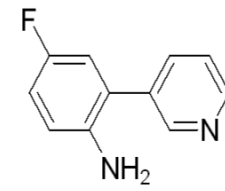

<sup>13</sup>C NMR (100 MHz, CDCl<sub>3</sub>)

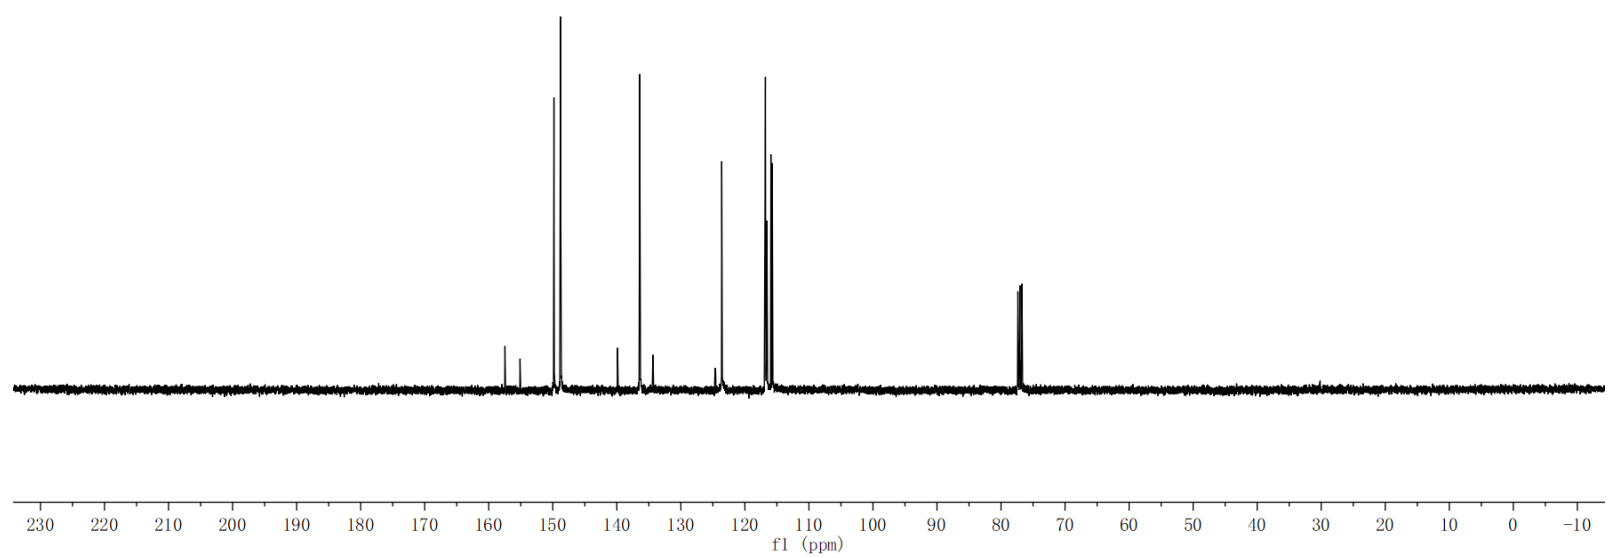

-126.491  
-126.504  
-126.514  
-126.527  
-126.537  
-126.550

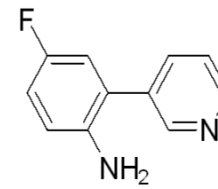

<sup>19</sup>F NMR (301 MHz, CDCl<sub>3</sub>)

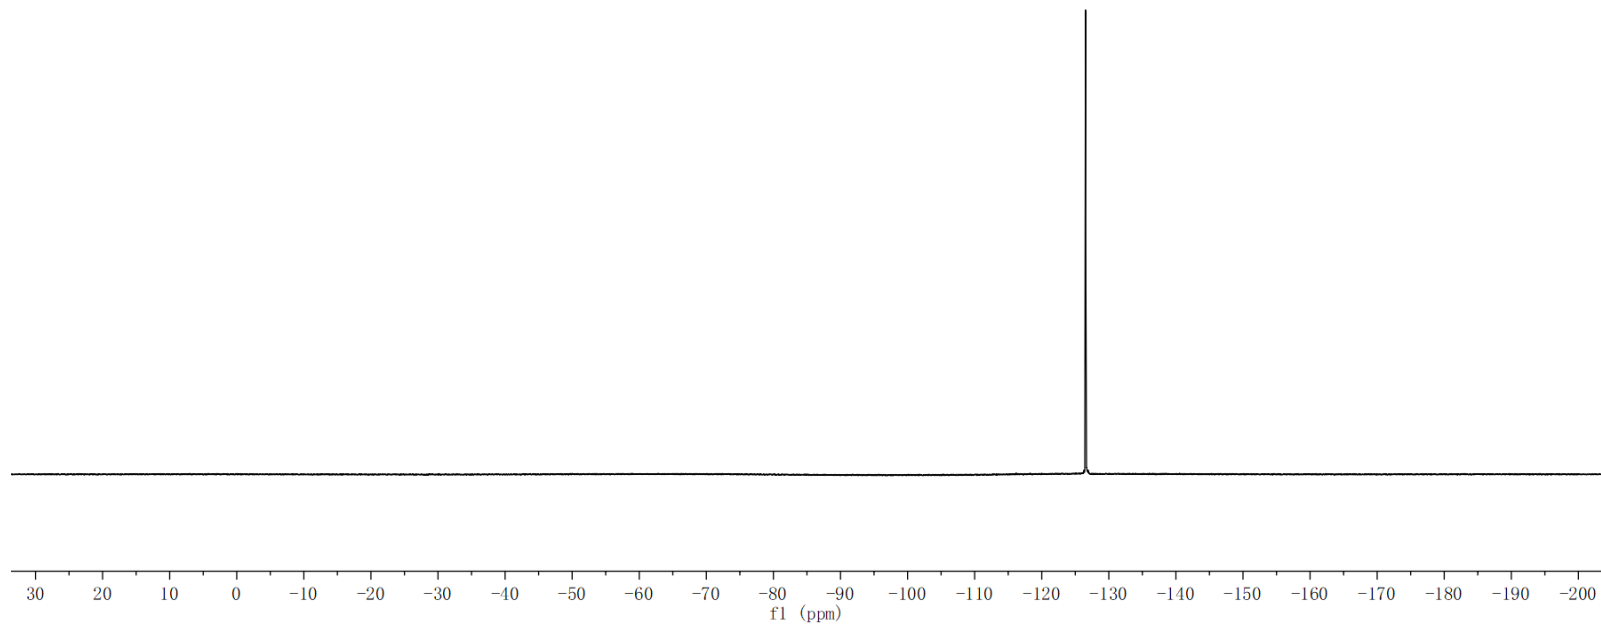

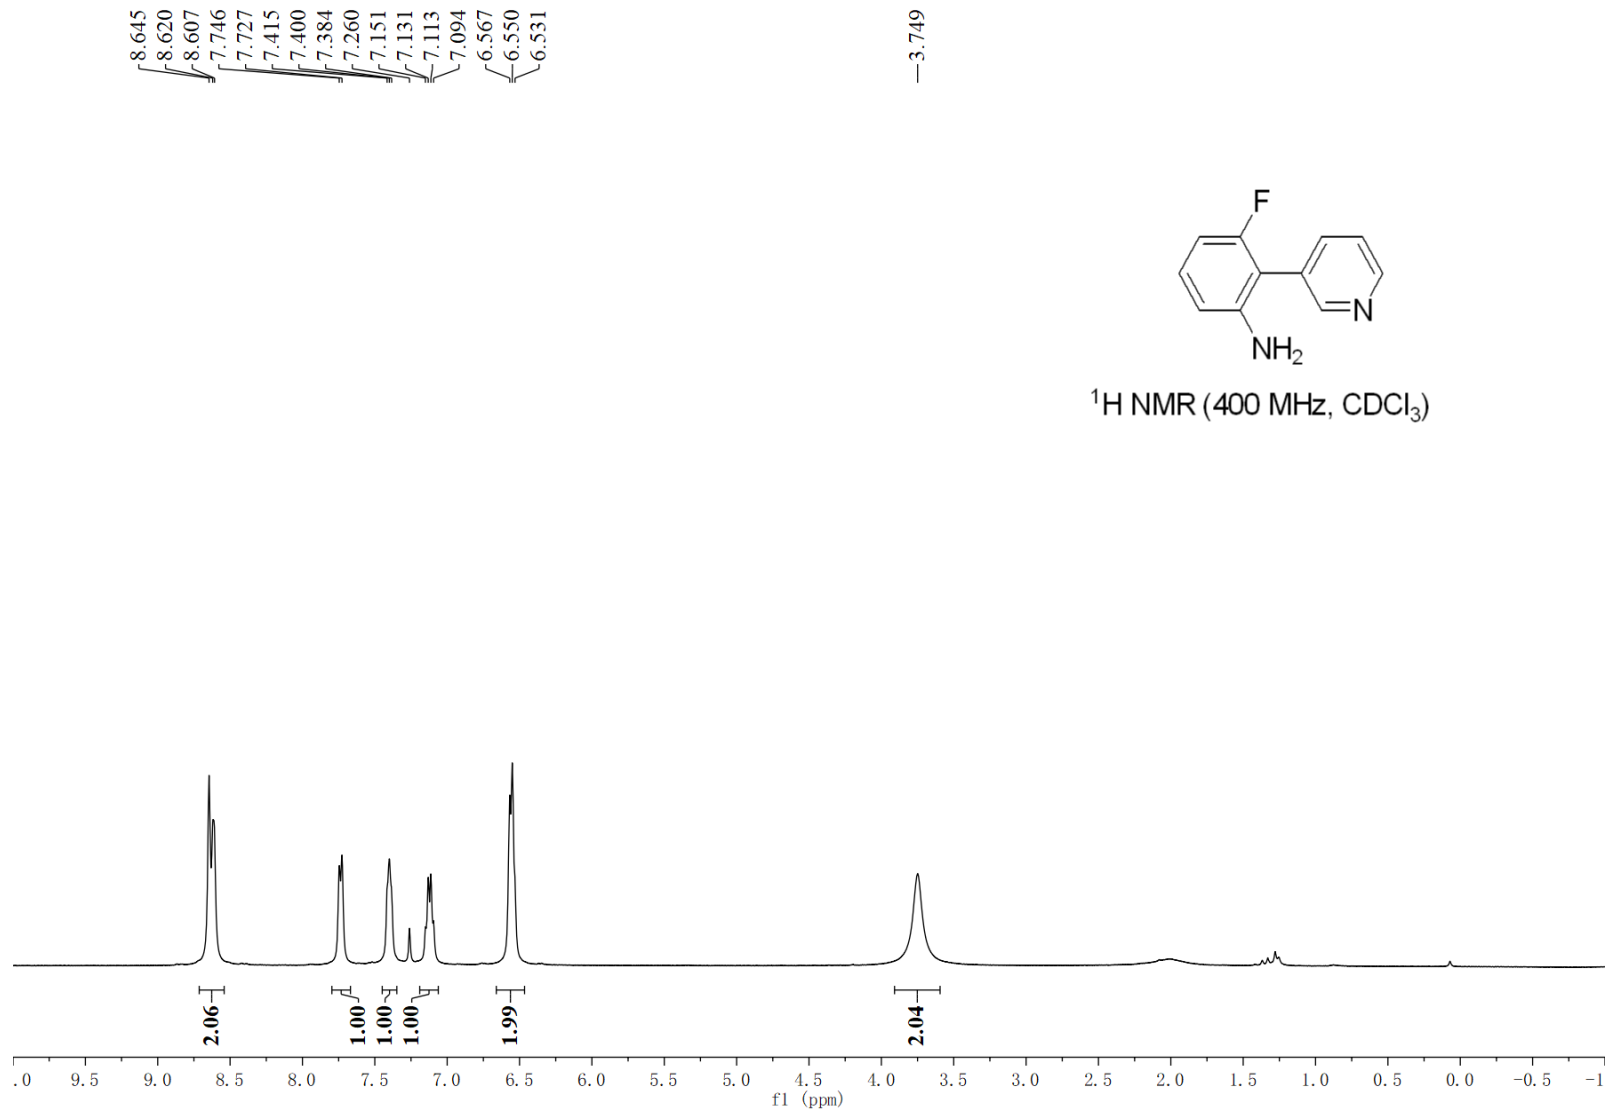

161.891  
159.467  
151.019  
151.006  
149.016  
145.887  
145.831  
138.010  
137.997  
129.990  
129.885  
128.606  
123.719  
110.987  
110.959  
105.160  
104.932

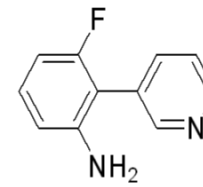

<sup>13</sup>C NMR (100 MHz, CDCl<sub>3</sub>)

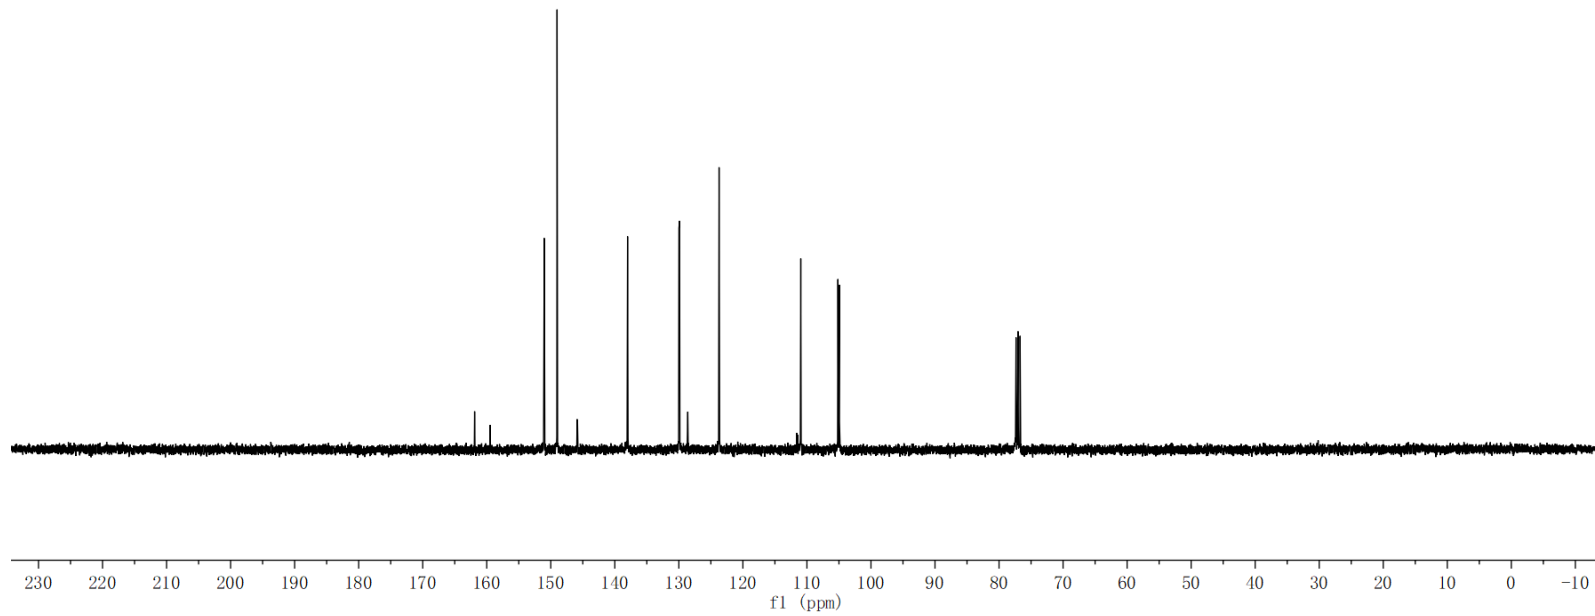

-115.589  
-115.605  
-115.613  
-115.631

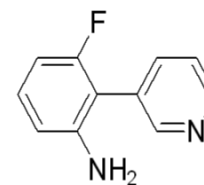

<sup>19</sup>F NMR (301 MHz, CDCl<sub>3</sub>)

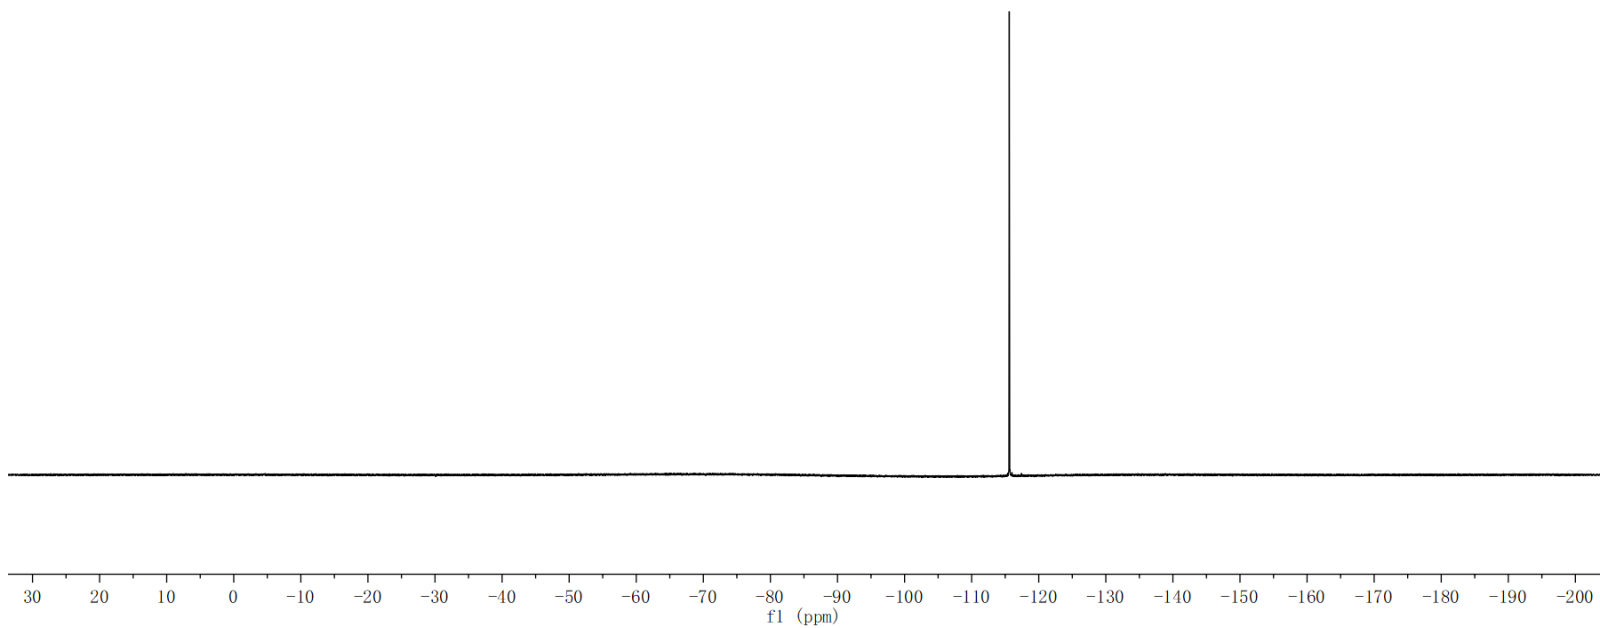

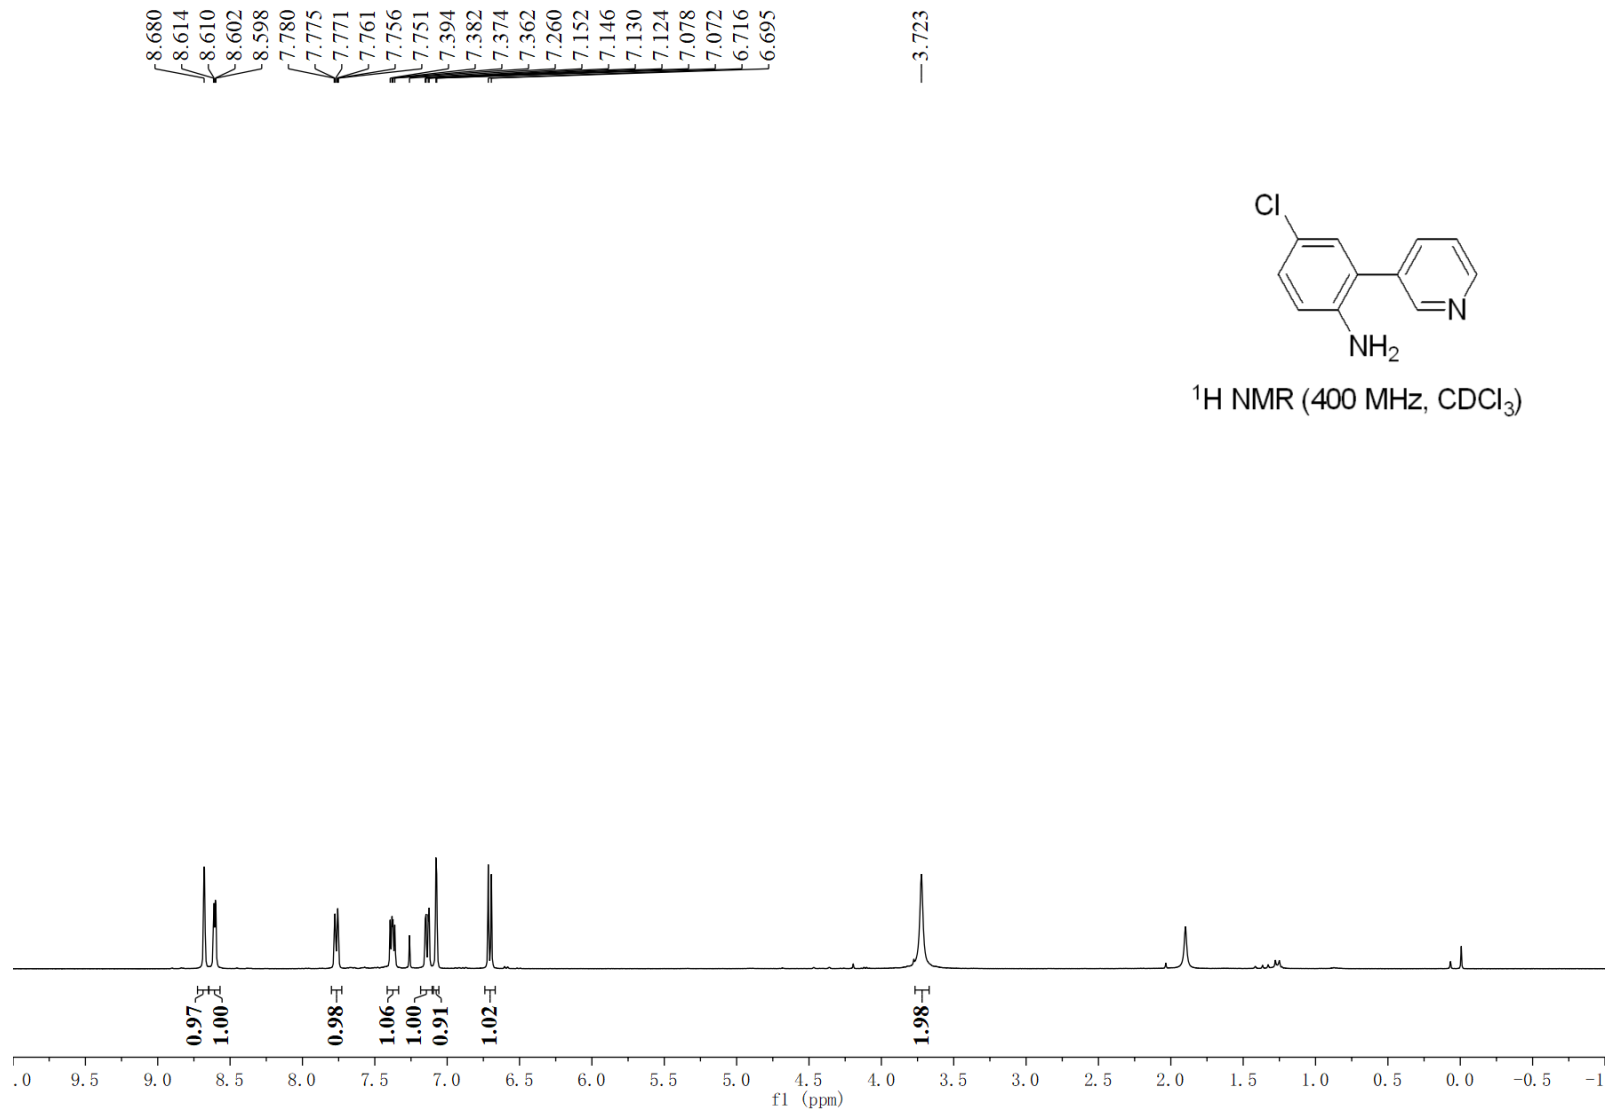

149.828  
148.903  
142.385  
136.440  
134.073  
129.992  
129.069  
124.950  
123.655  
123.402  
116.963

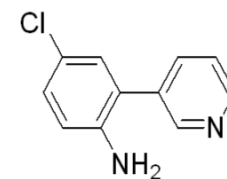

$^{13}\text{C}$  NMR (100 MHz,  $\text{CDCl}_3$ )

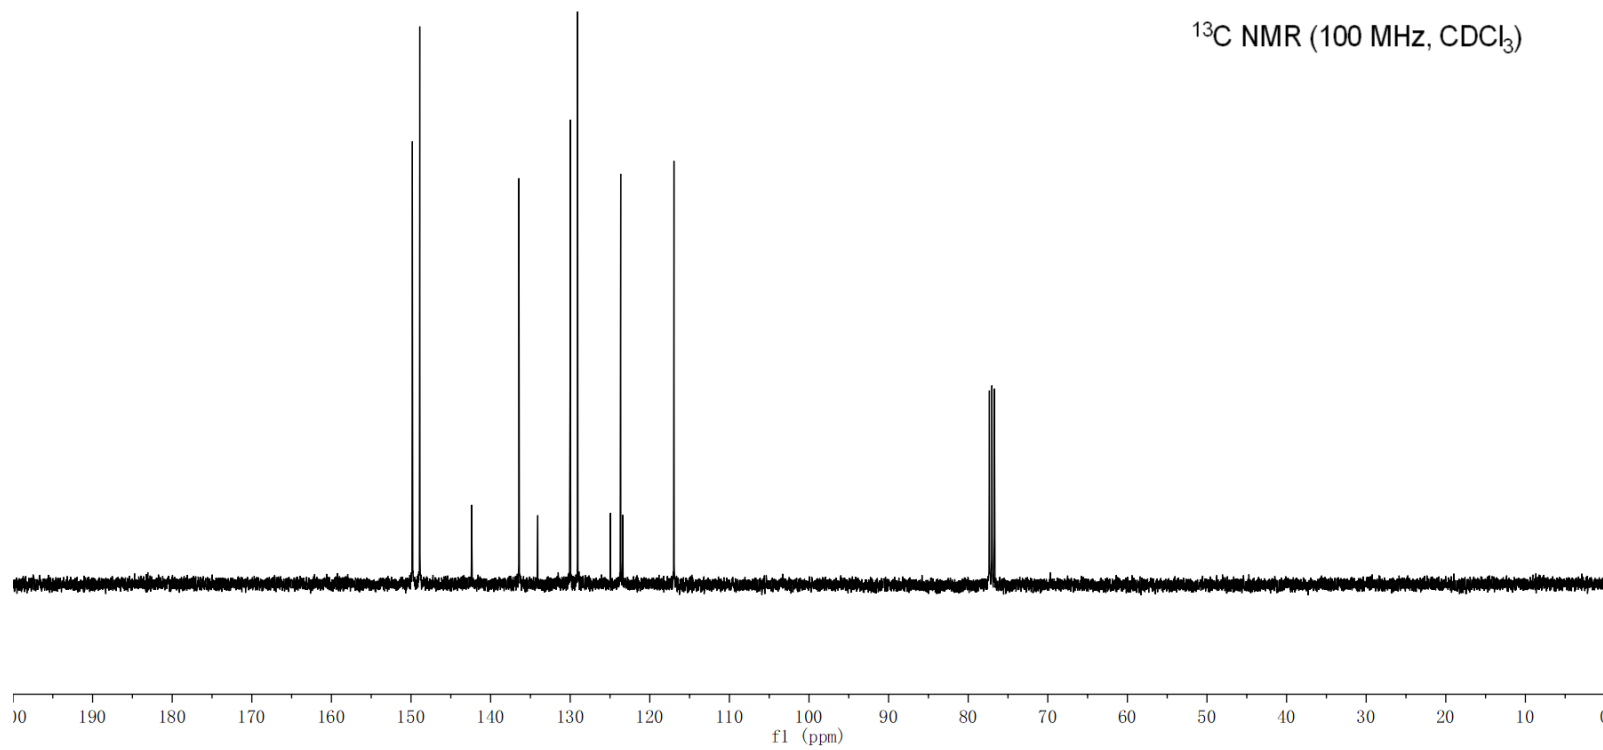



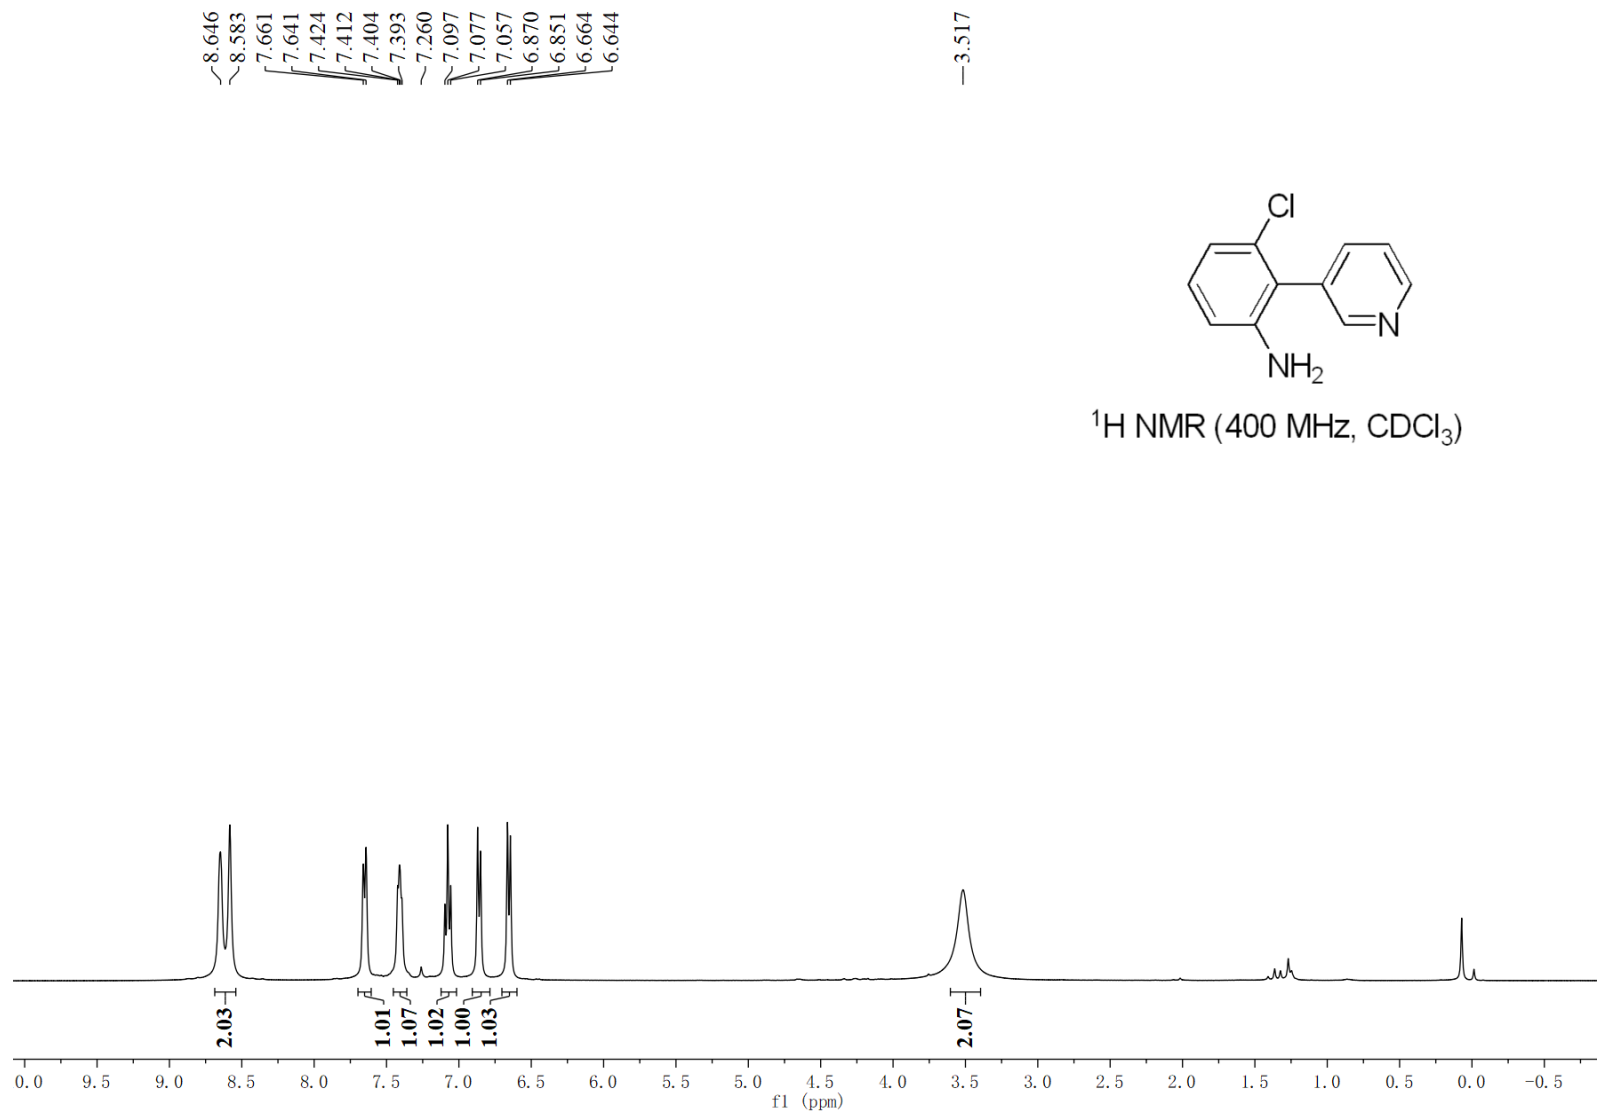

150.876  
148.961  
145.919  
138.105  
134.250  
132.291  
129.790  
123.966  
122.104  
119.056  
113.687

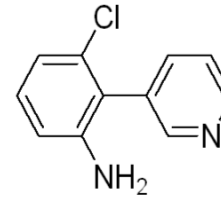

<sup>13</sup>C NMR (100 MHz, CDCl<sub>3</sub>)

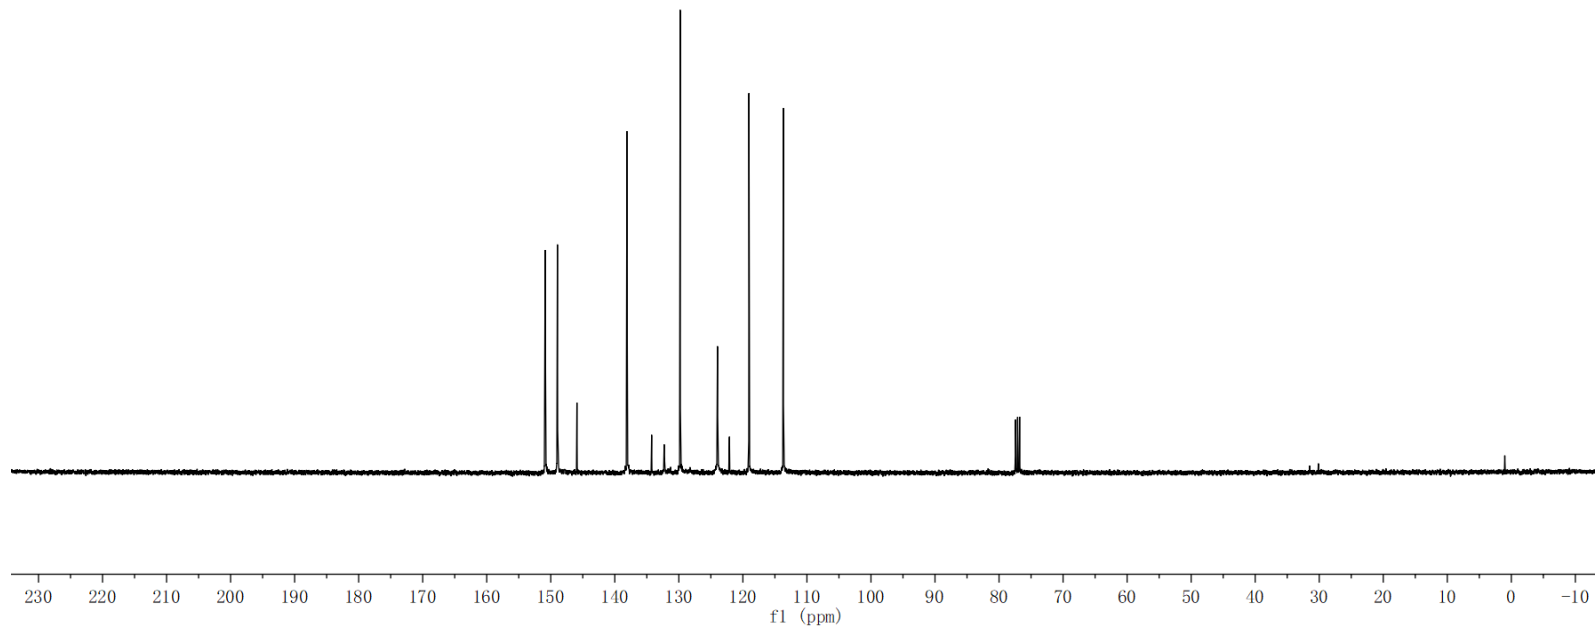

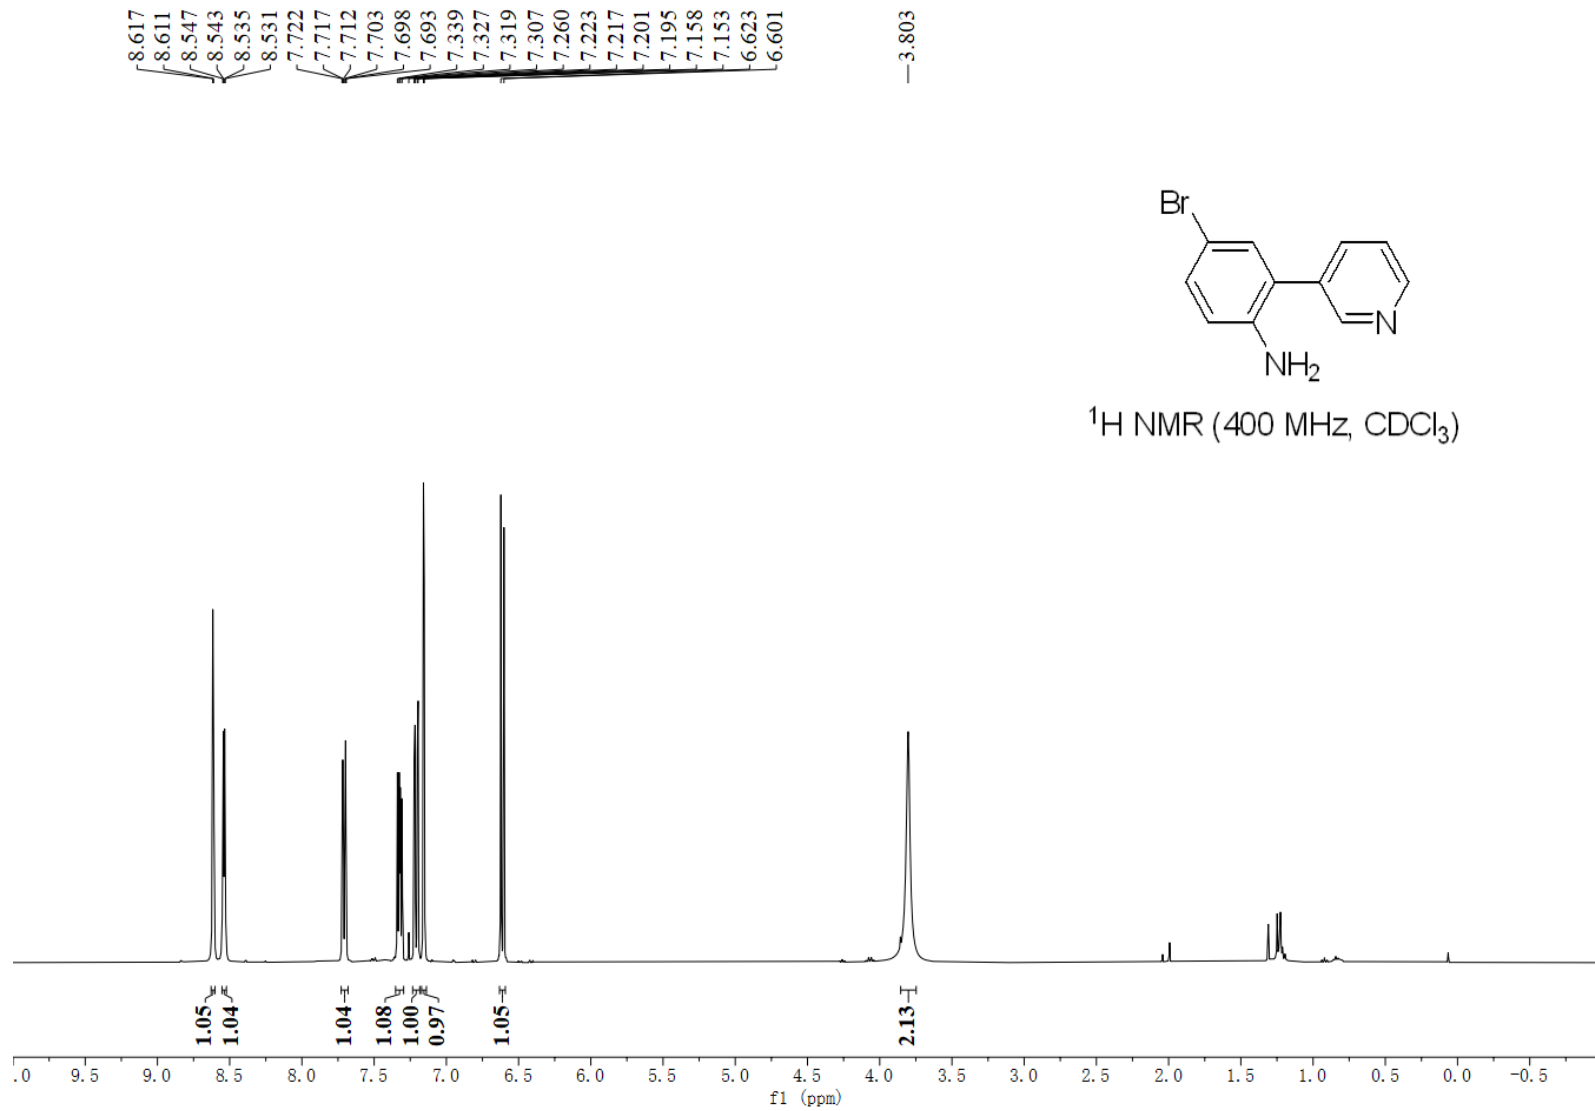

149.703  
148.769  
143.012  
136.512  
134.039  
132.757  
131.936  
125.335  
123.713  
117.368  
110.227

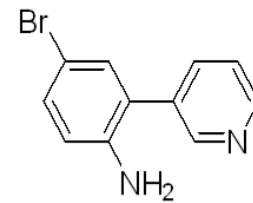

$^{13}\text{C}$  NMR (101 MHz,  $\text{CDCl}_3$ )

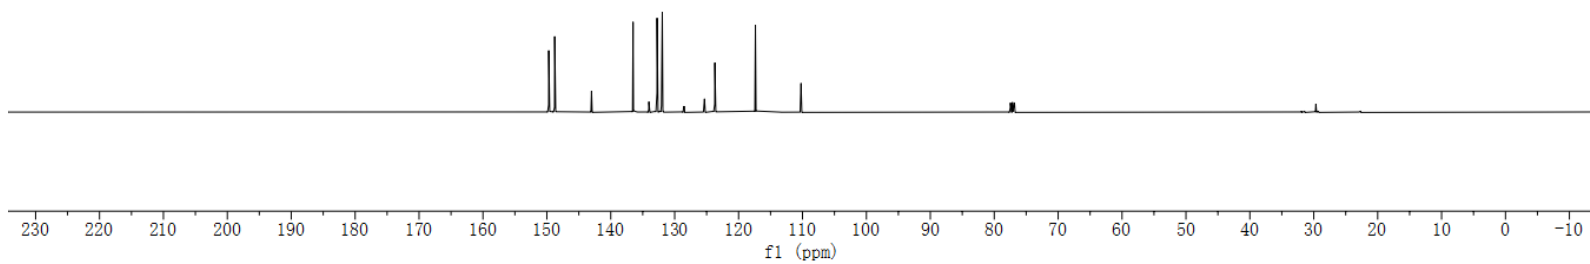

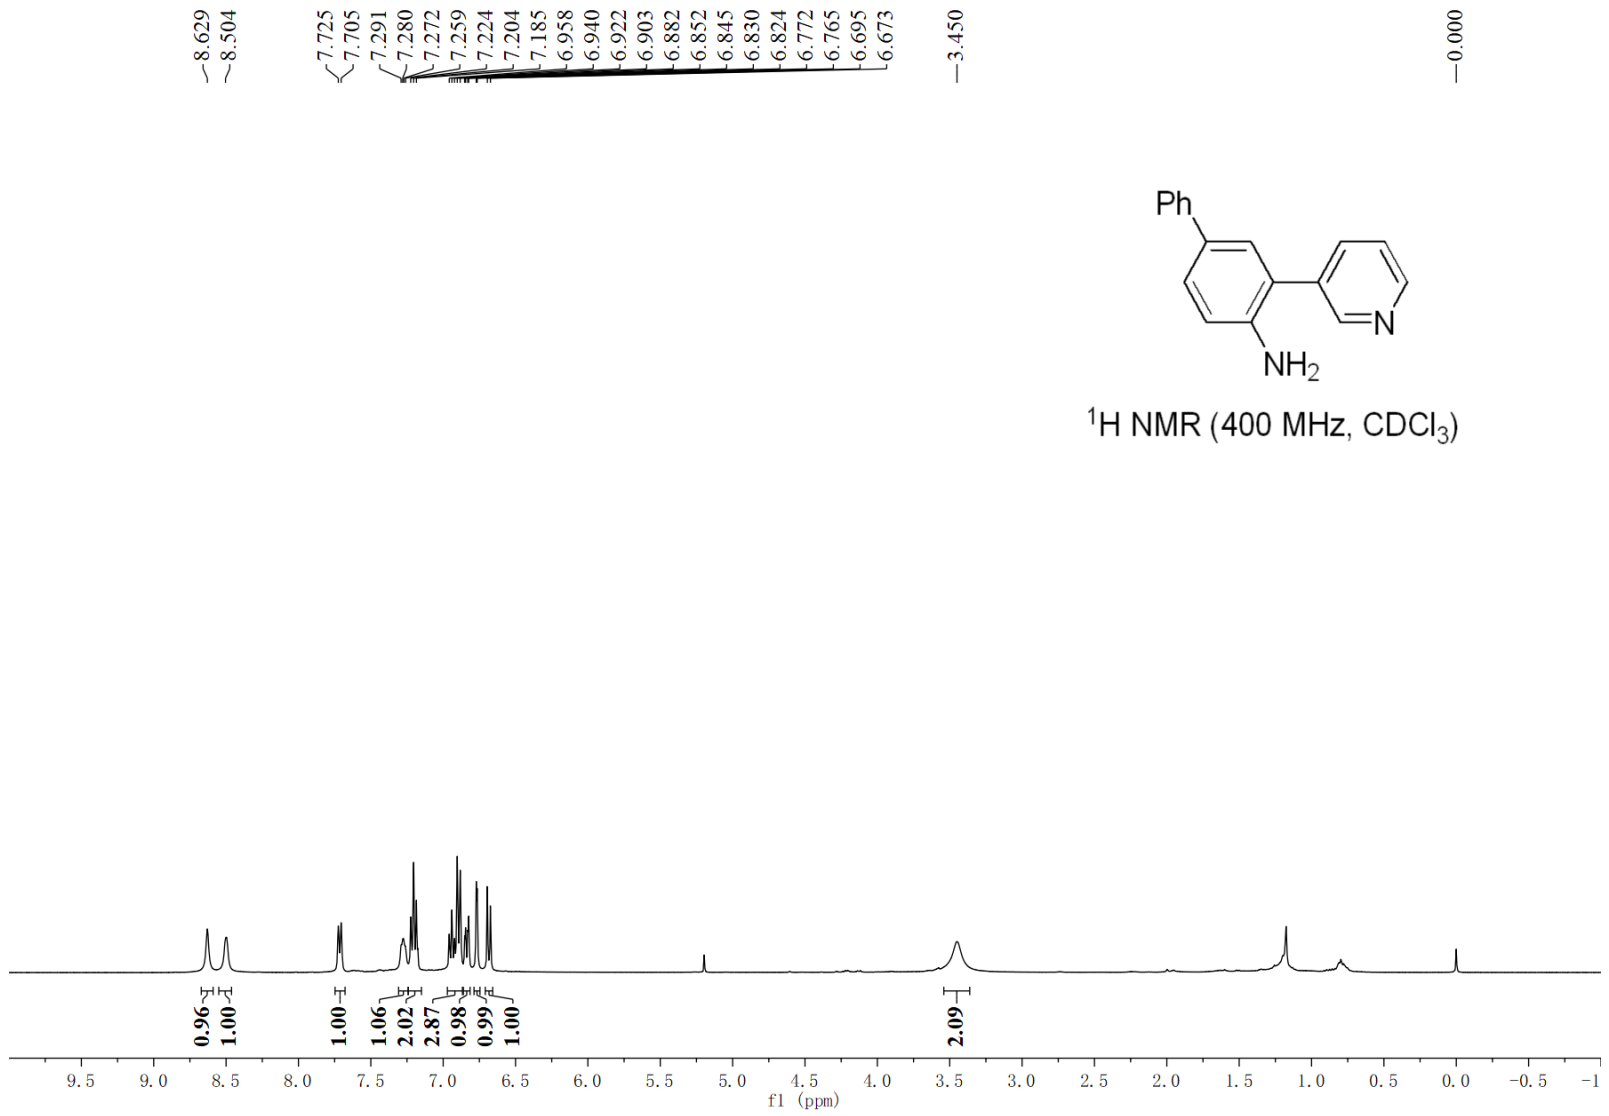

158.518  
149.827  
148.910  
148.552  
139.999  
136.510  
134.738  
129.596  
124.801  
123.625  
122.358  
121.868  
121.063  
117.423  
117.086

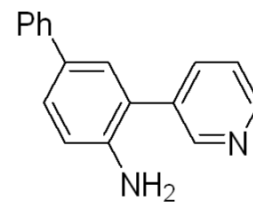

<sup>13</sup>C NMR (100 MHz, CDCl<sub>3</sub>)

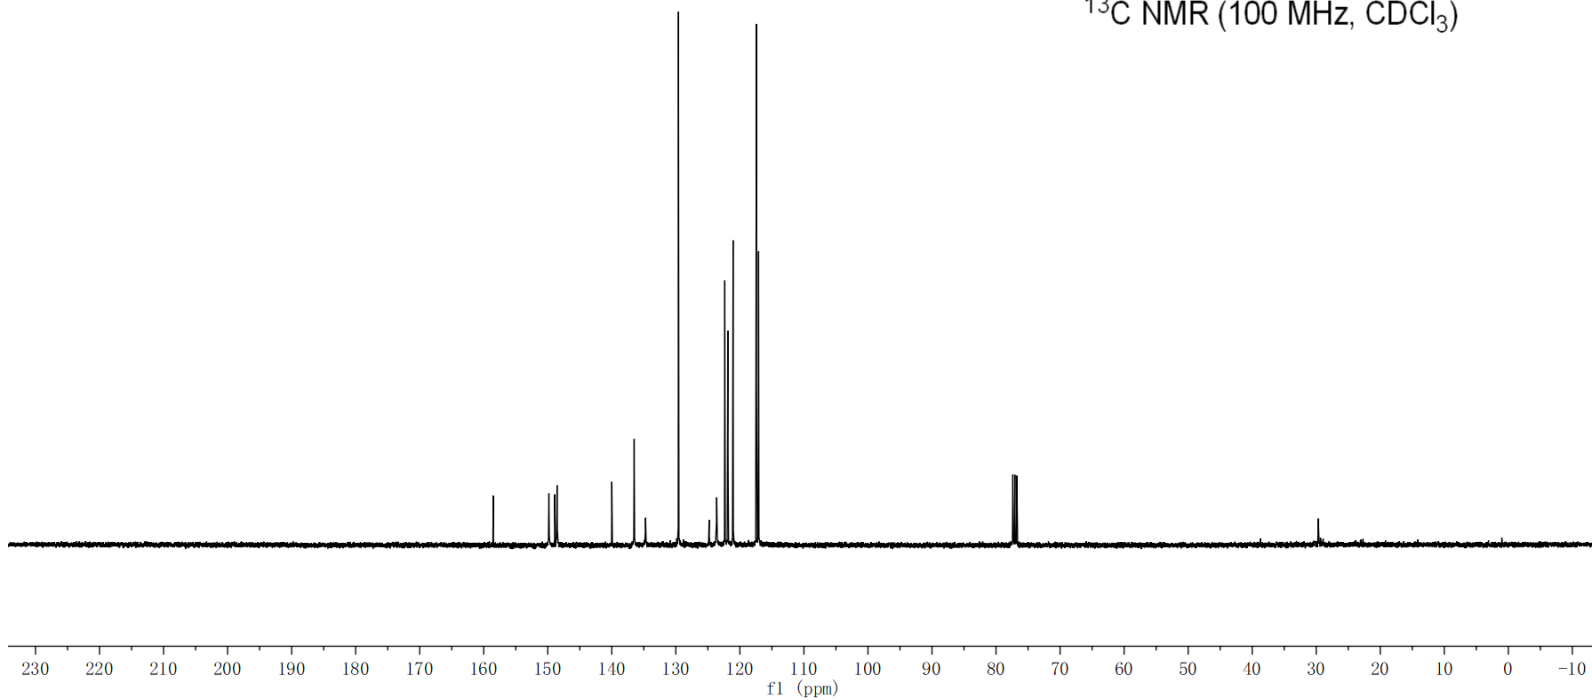

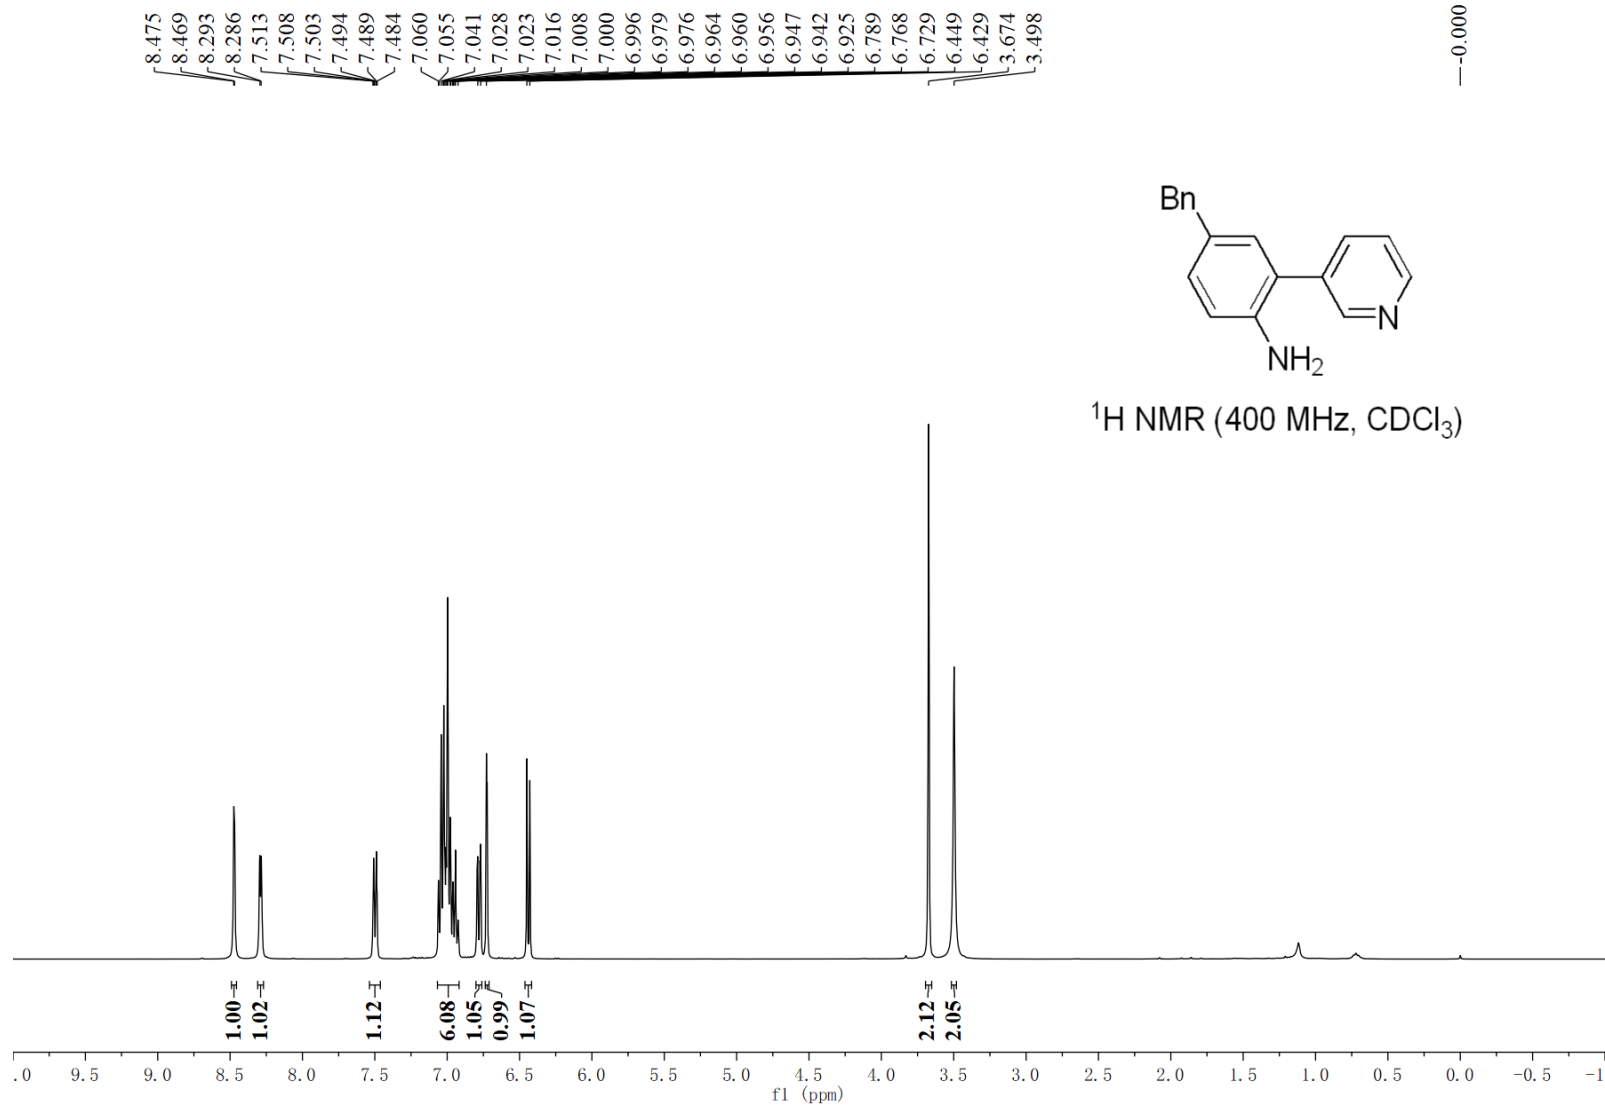

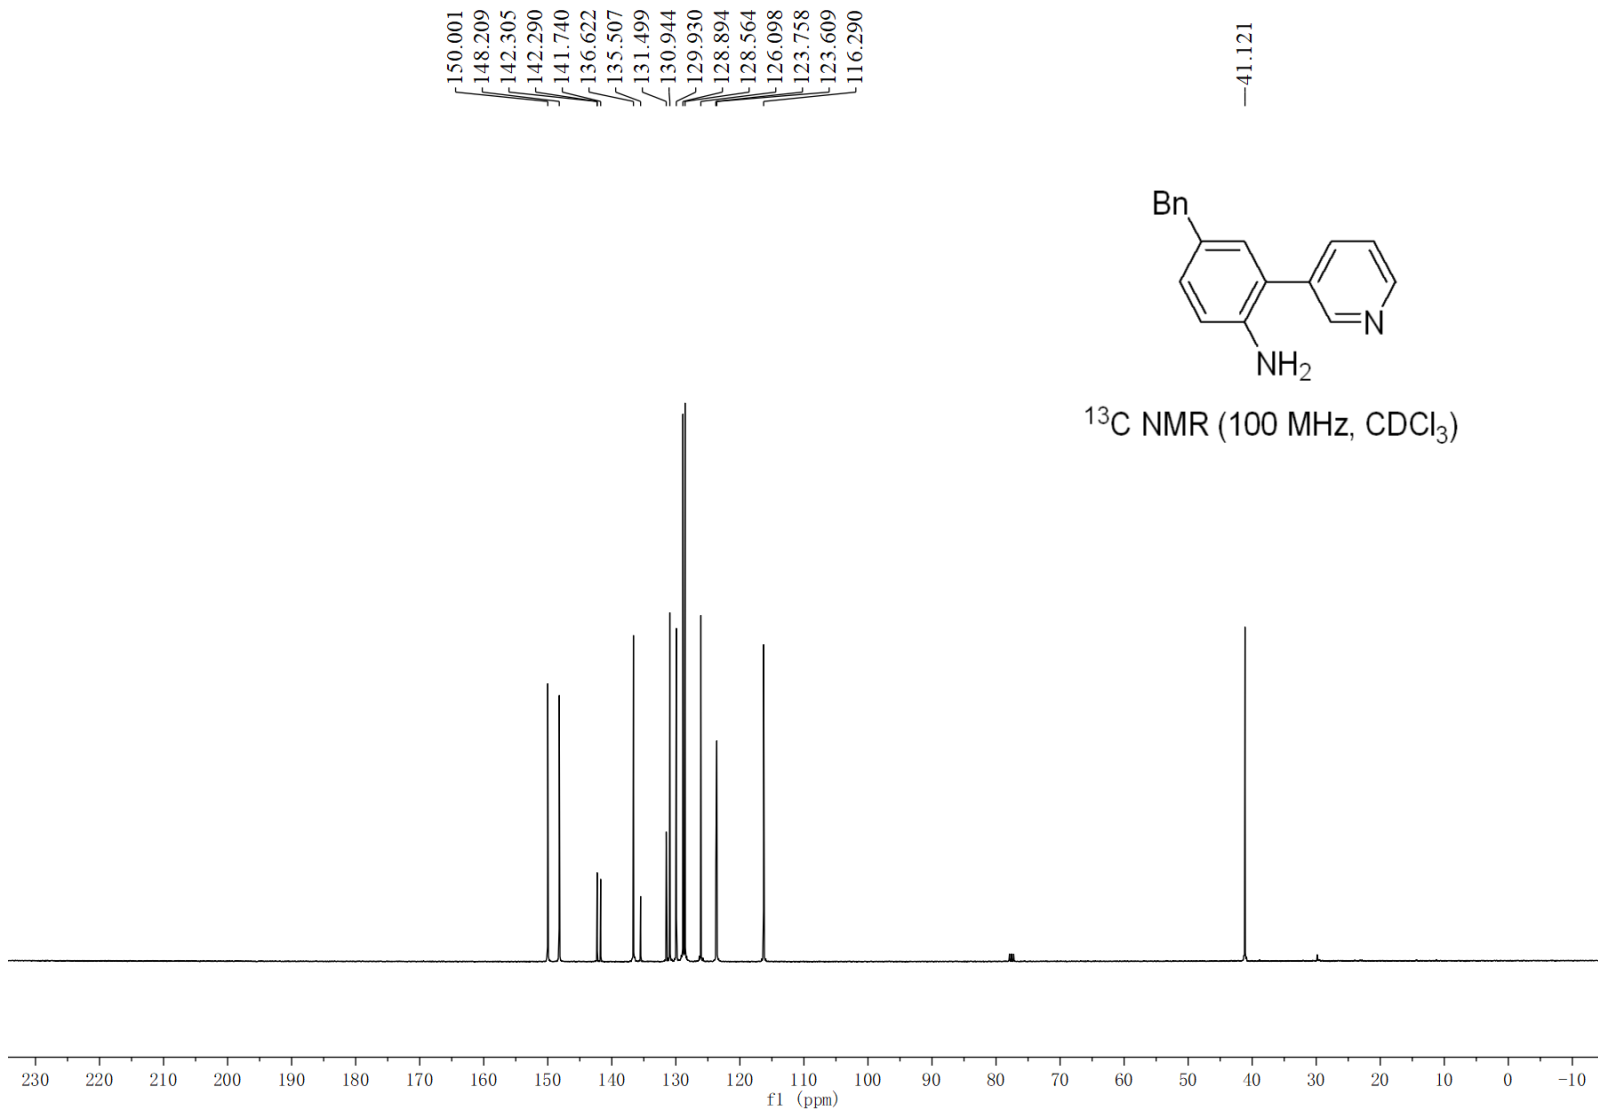



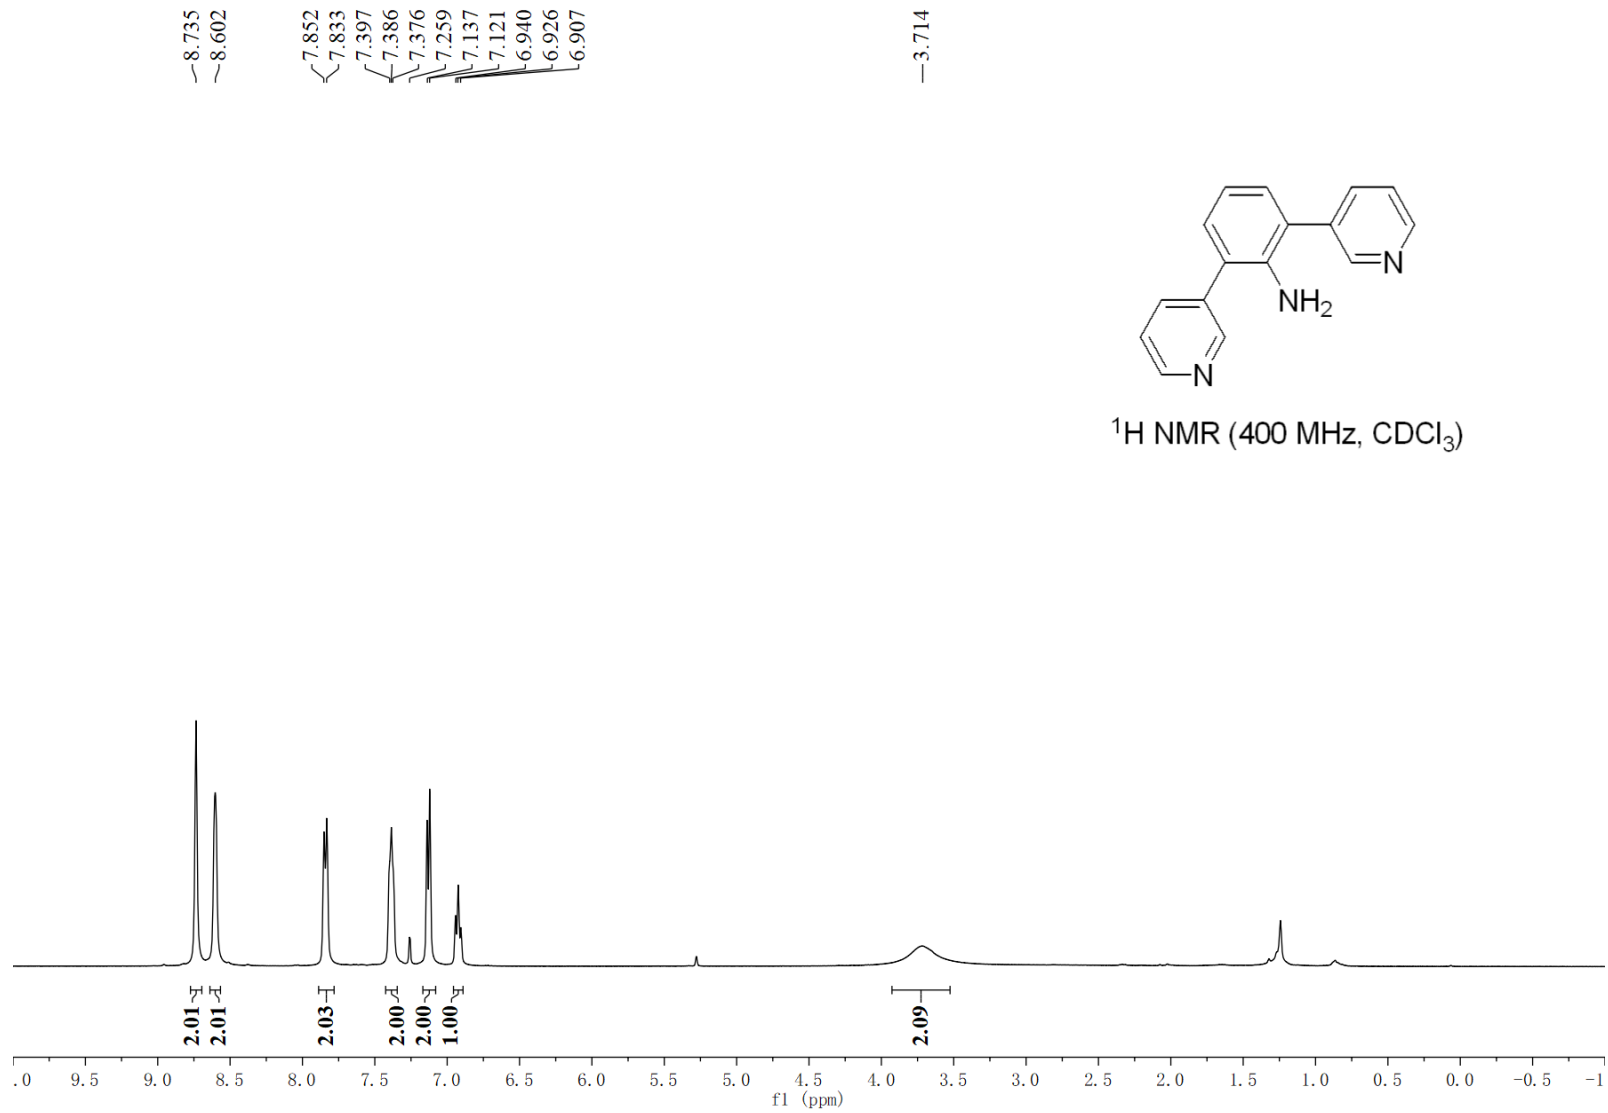

150.142  
148.652  
141.238  
136.765  
135.098  
130.689  
124.366  
123.623  
118.697

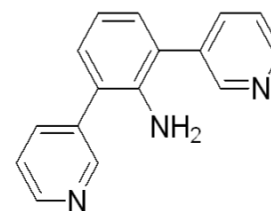

$^{13}\text{C}$  NMR (100 MHz,  $\text{CDCl}_3$ )

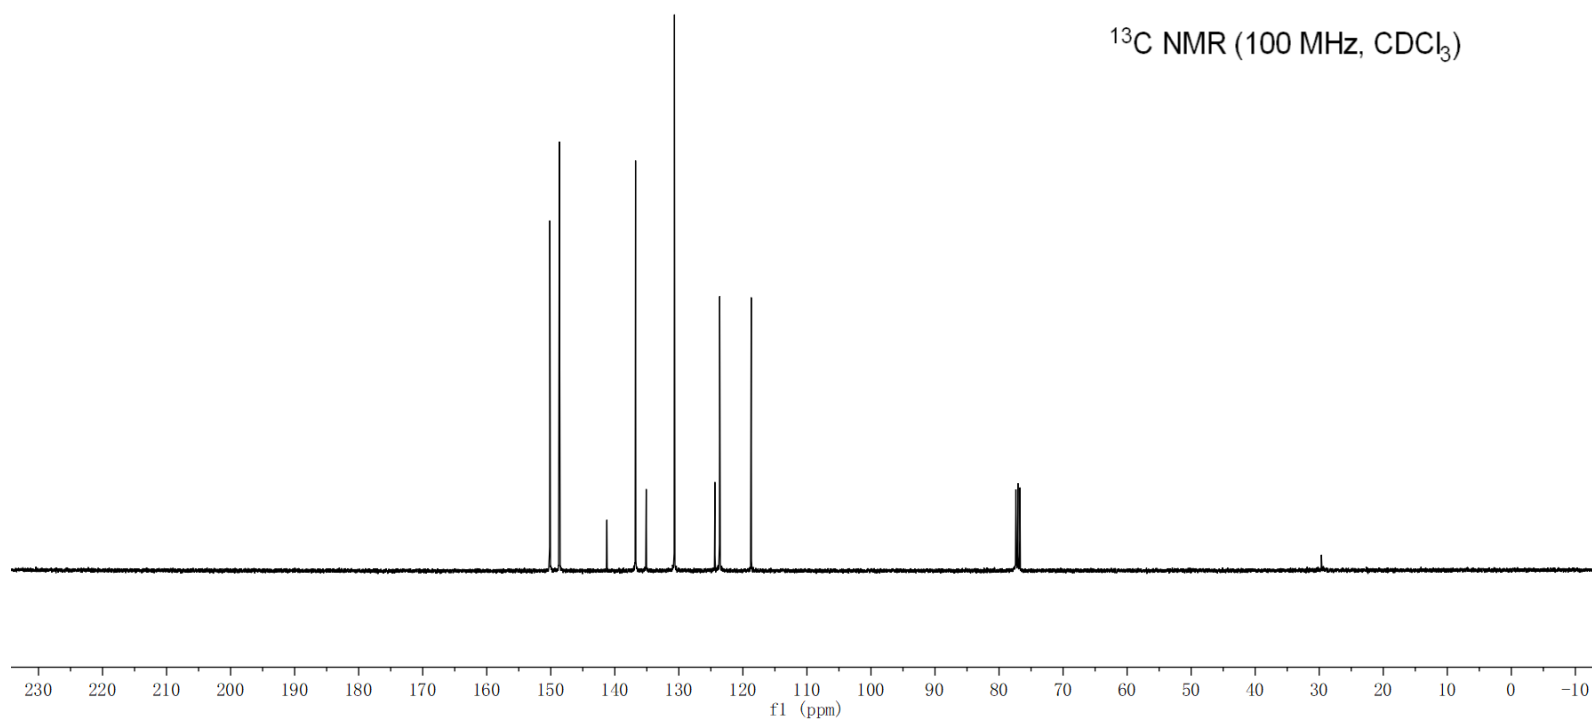

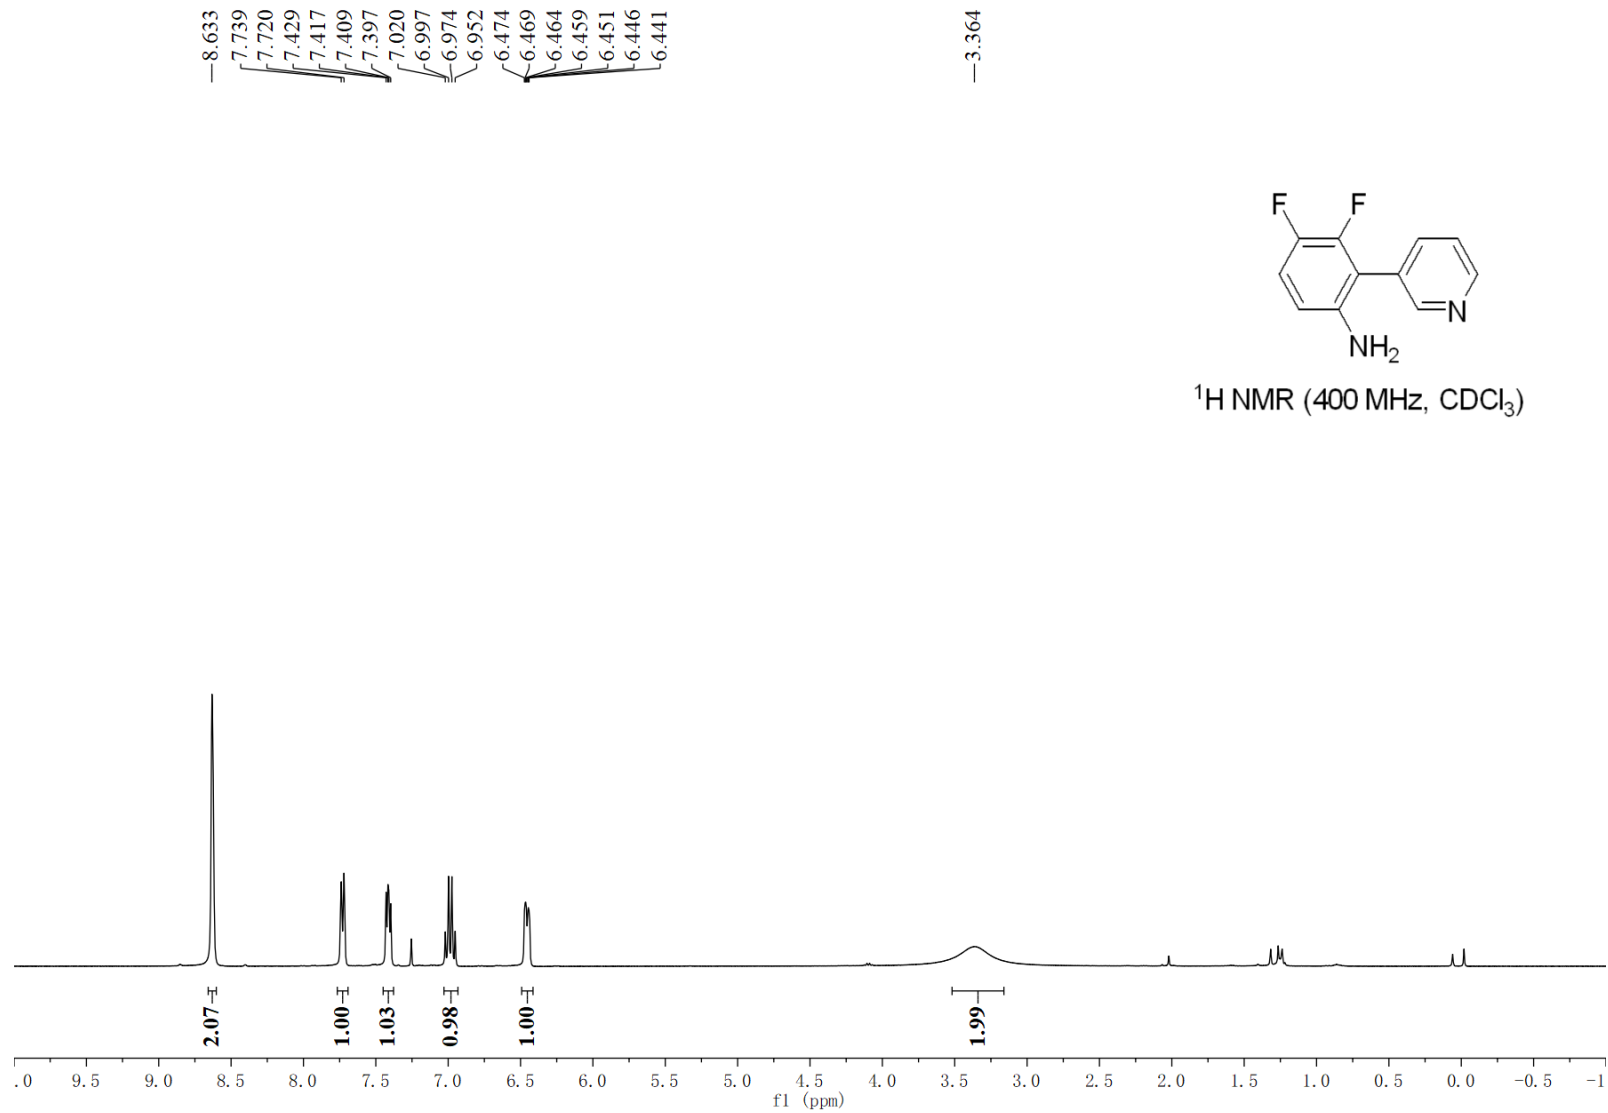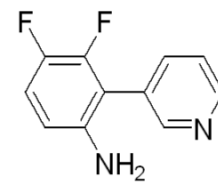

150.810  
150.795  
149.437  
147.061  
146.925  
145.070  
144.934  
142.702  
142.566  
137.915  
137.902  
127.838  
123.841  
117.240  
117.220  
117.062  
117.041  
113.410  
113.254  
110.053  
110.016  
109.994  
109.957

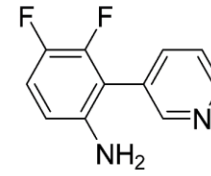

$^{13}\text{C}$  NMR (100 MHz,  $\text{CDCl}_3$ )

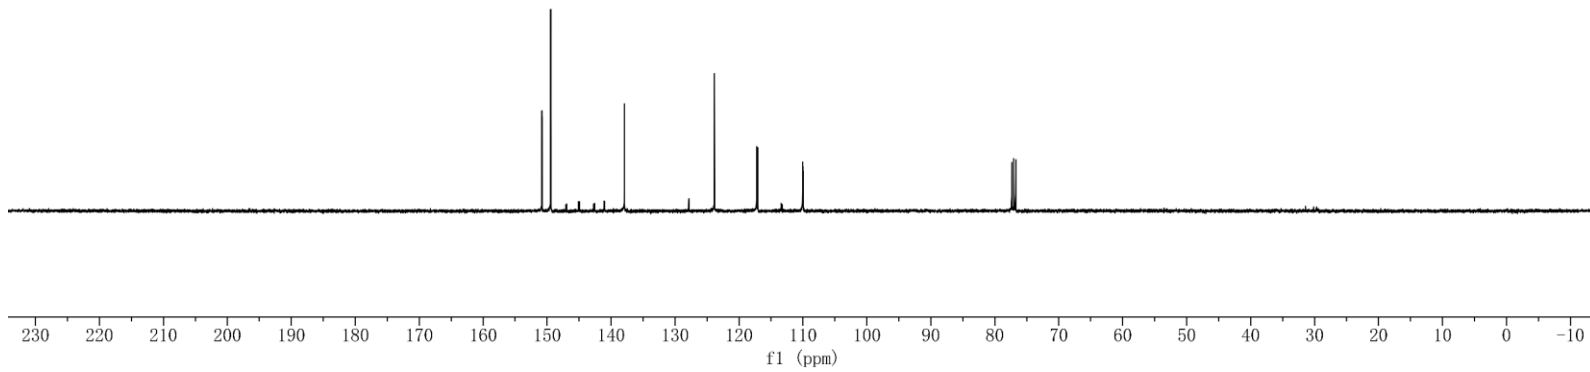

-139.757  
-139.780  
-139.817  
-139.840  
-150.744  
-150.752  
-150.761  
-150.769  
-150.778  
-150.787  
-150.803  
-150.812  
-150.814  
-150.830  
-150.838  
-150.847

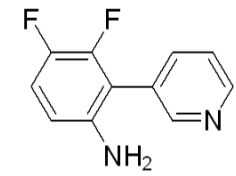

<sup>19</sup>F NMR (301 MHz, CDCl<sub>3</sub>)

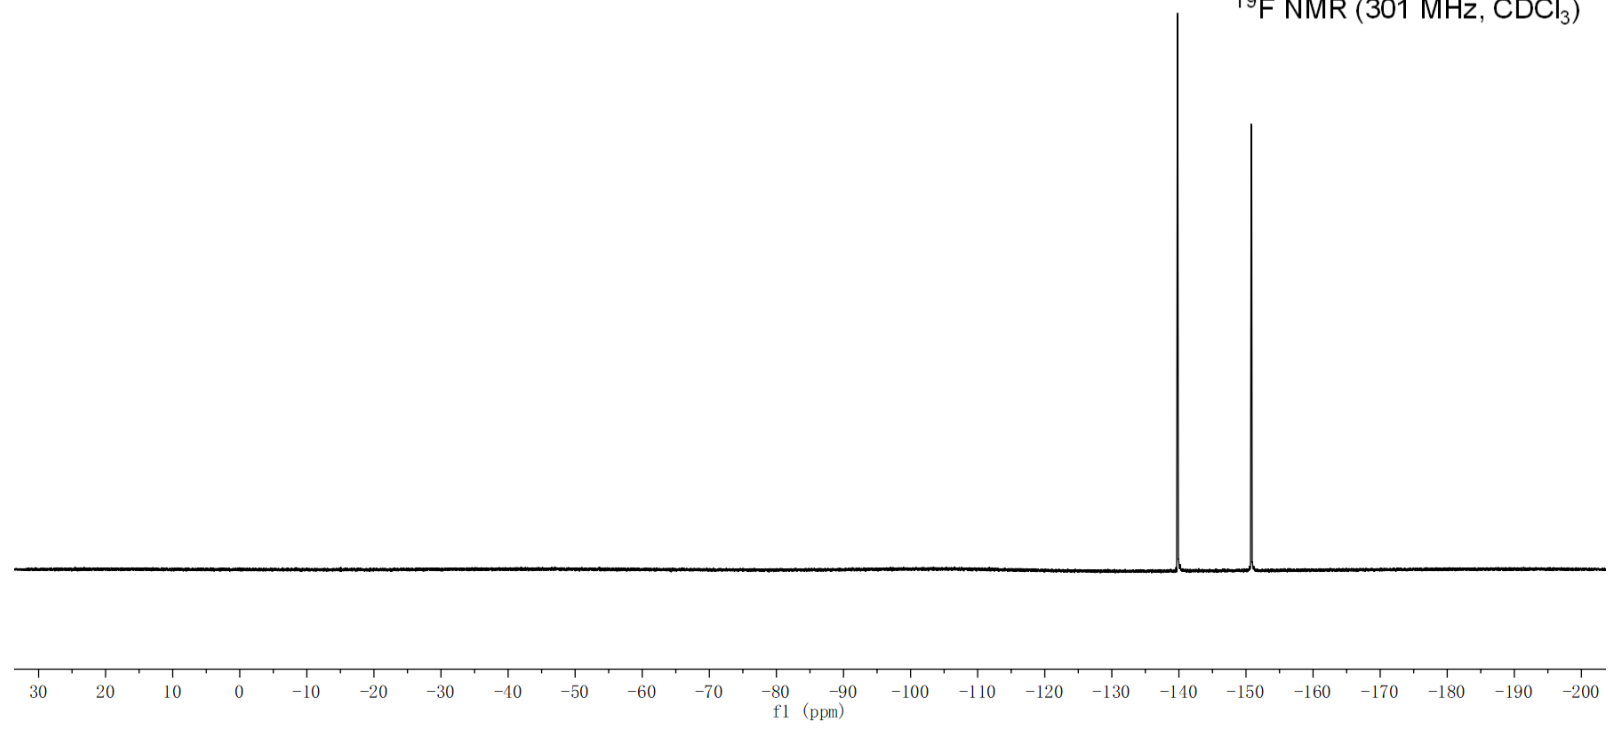

8.678  
8.639  
7.751  
7.732  
7.408  
7.392  
7.376  
7.260  
6.785  
6.524

3.515

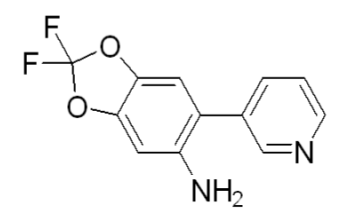

<sup>1</sup>H NMR (400 MHz, CDCl<sub>3</sub>)

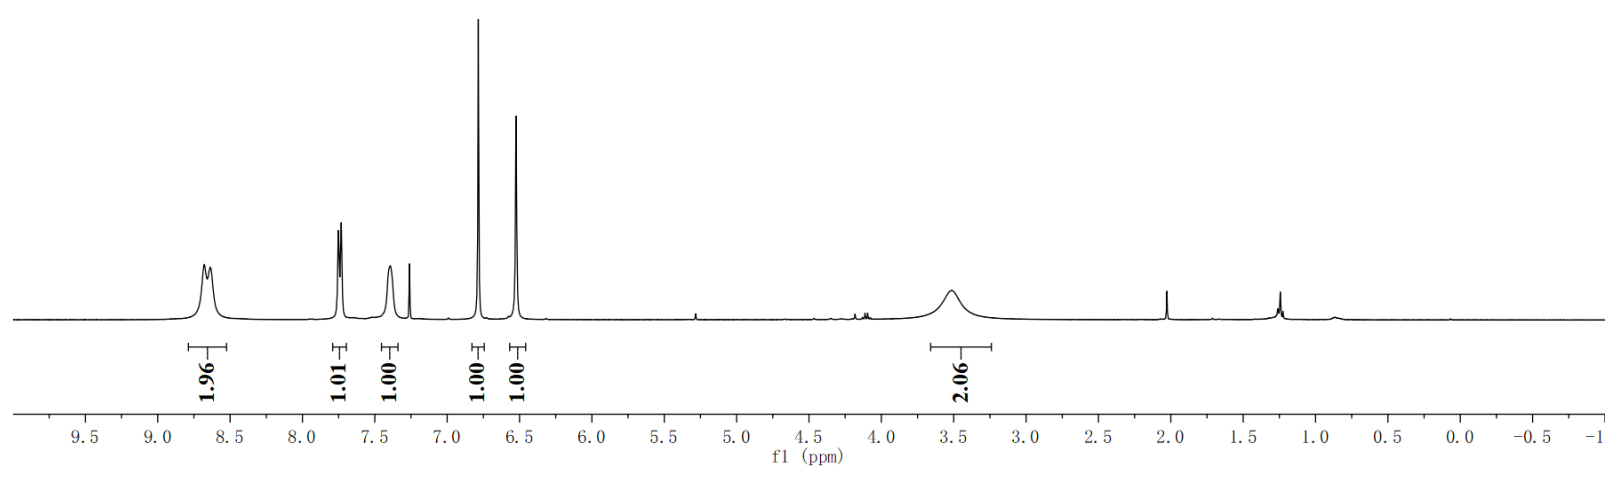

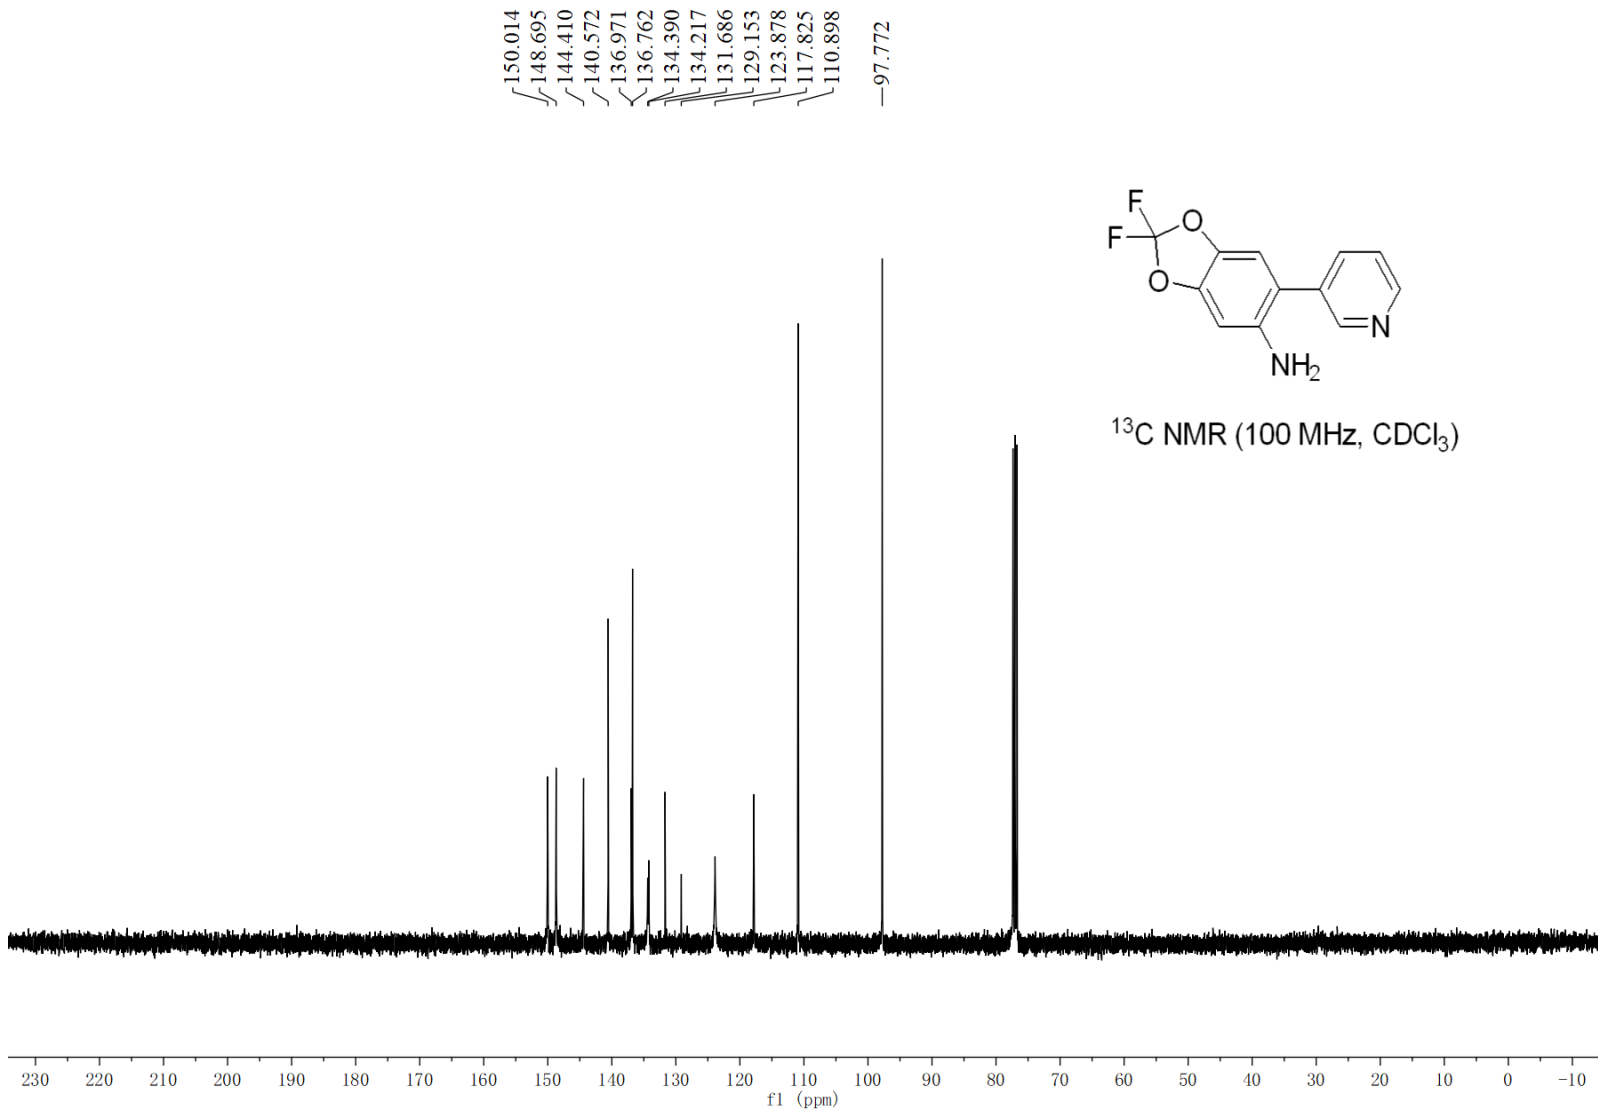

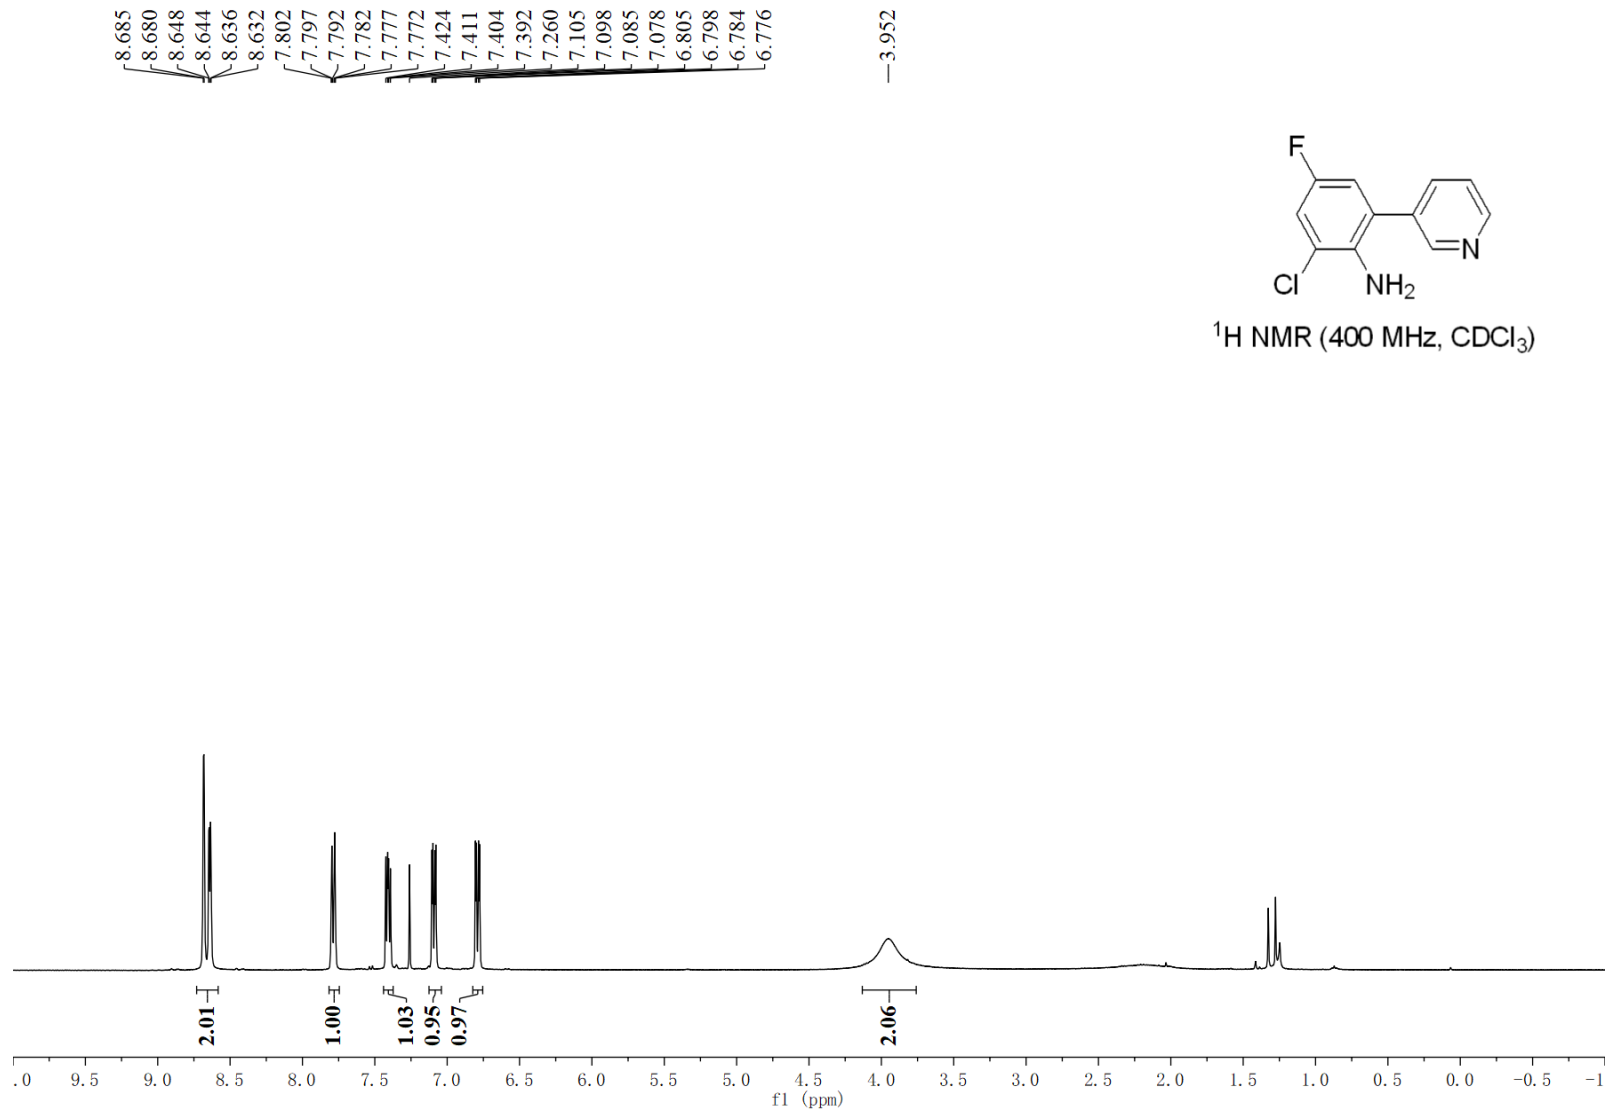



156.015  
153.629  
149.558  
149.175  
— 136.588  
123.840  
116.520  
116.266  
115.902  
115.677

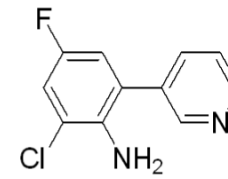

<sup>13</sup>C NMR (100 MHz, CDCl<sub>3</sub>)

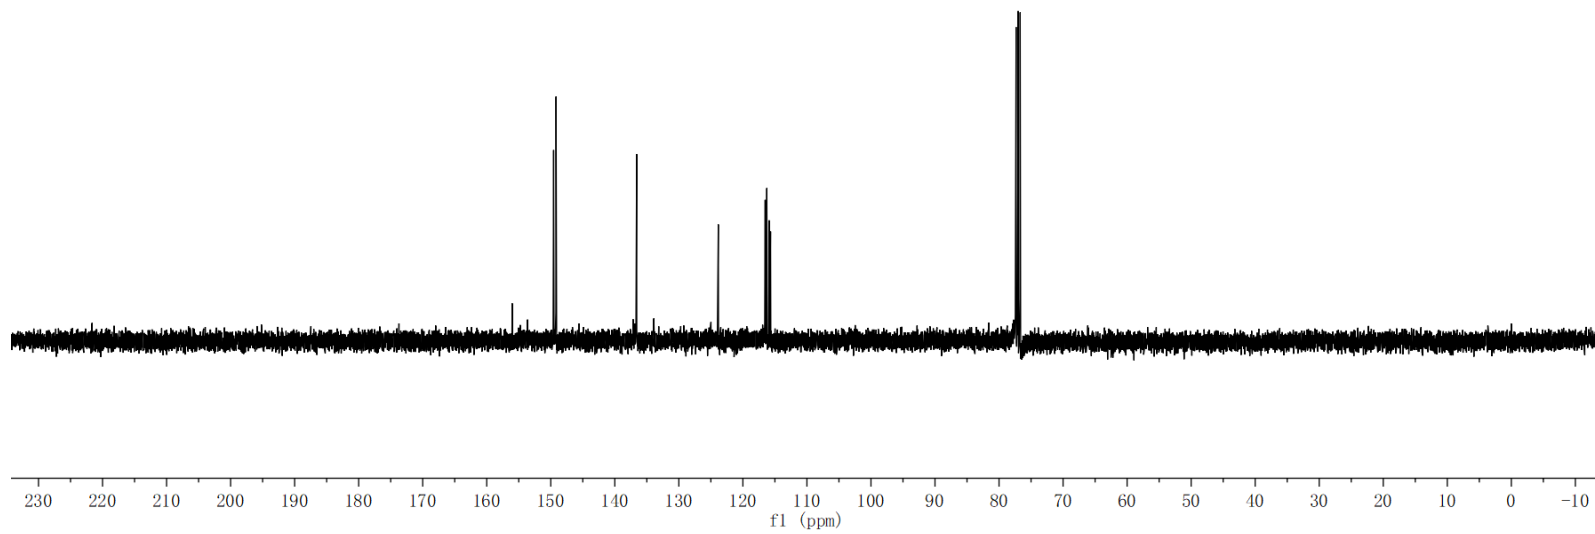

-125.357  
-125.379  
-125.401

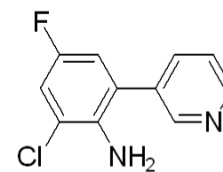

<sup>19</sup>F NMR (301 MHz, CDCl<sub>3</sub>)

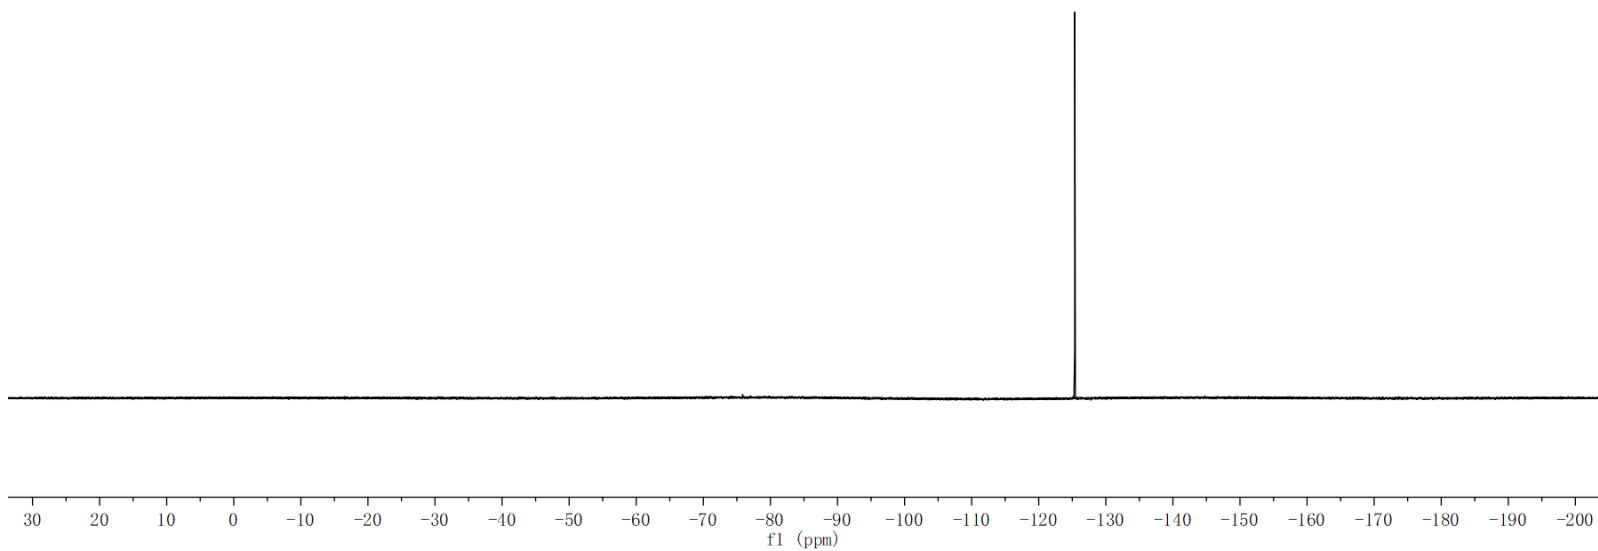

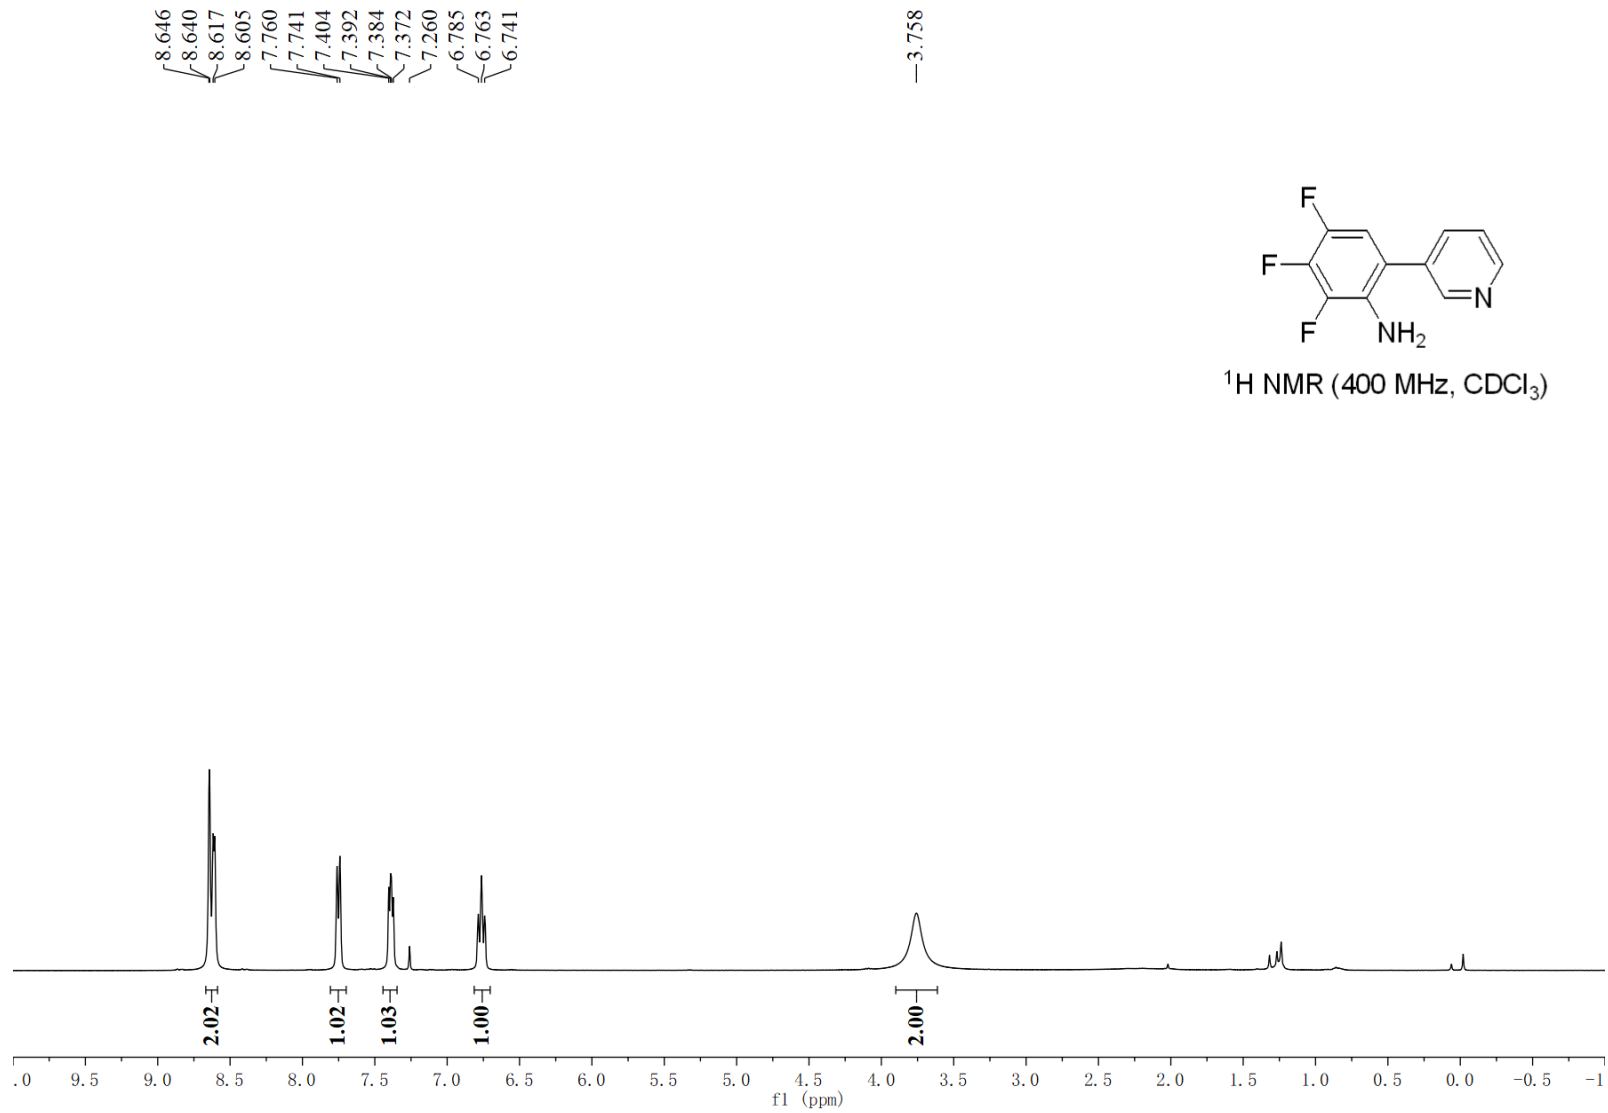

149.694  
149.286  
144.834  
144.763  
142.476  
142.339  
141.444  
141.306  
141.144  
139.342  
138.955  
138.796  
138.660  
136.373  
132.660  
130.233  
130.131  
123.743  
118.790  
112.603  
112.569  
112.420  
112.386

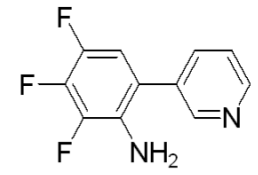

<sup>13</sup>C NMR (100 MHz, CDCl<sub>3</sub>)

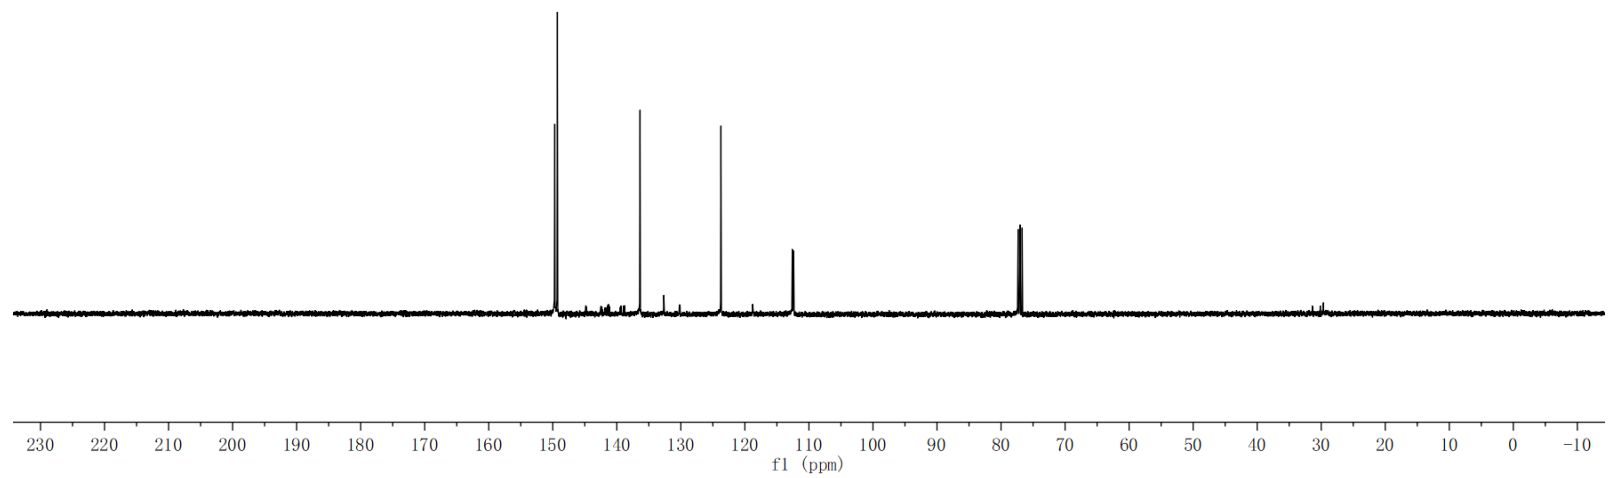

149.171  
149.198  
149.229  
149.256  
153.932  
153.938  
153.984  
153.990  
160.010  
160.030  
160.064  
160.085  
160.120  
160.141

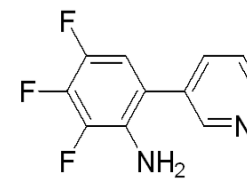

$^{19}\text{F}$  NMR (301 MHz,  $\text{CDCl}_3$ )

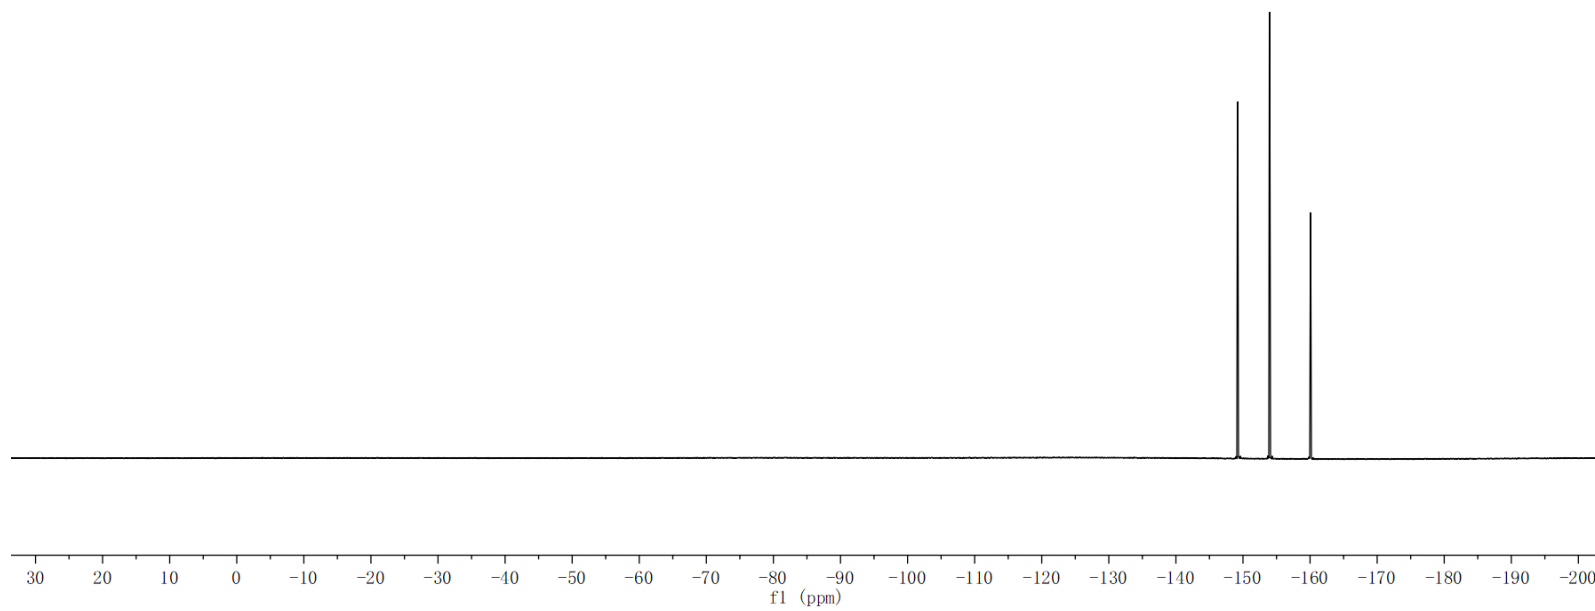

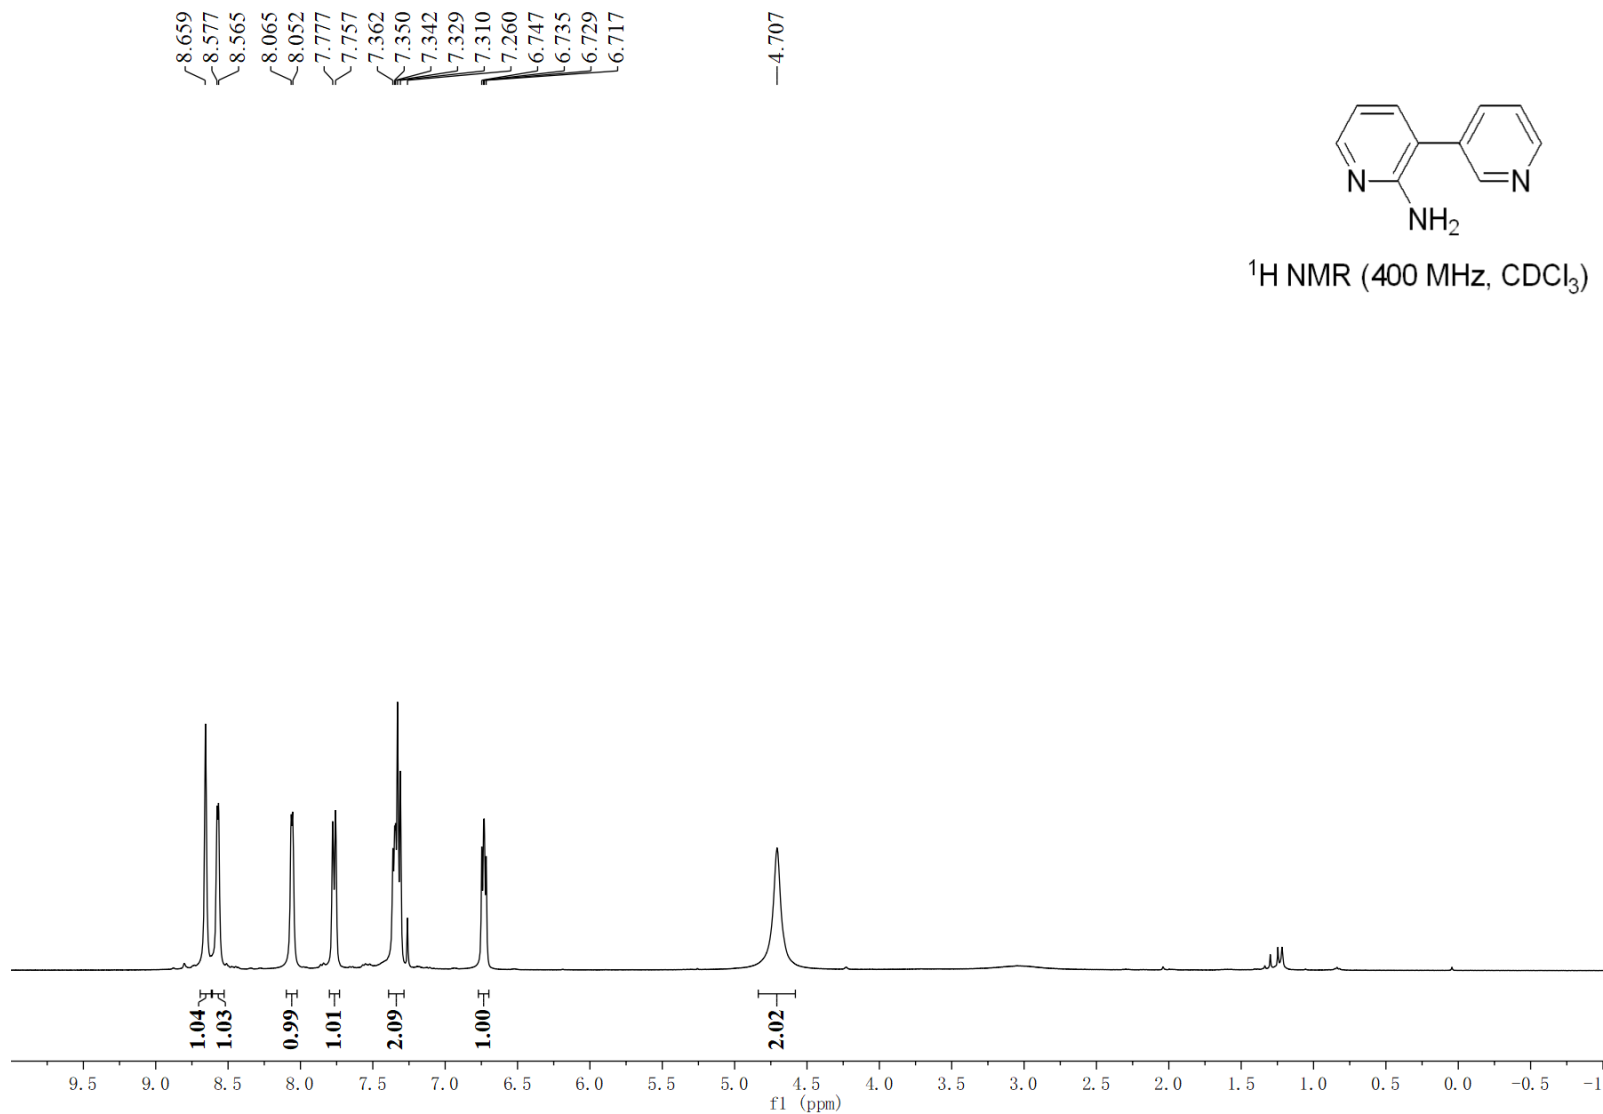

155.969  
149.680  
148.970  
148.086  
138.156  
136.101  
133.892  
123.670  
118.085  
114.532

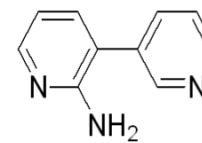

$^{13}\text{C}$  NMR (100 MHz,  $\text{CDCl}_3$ )

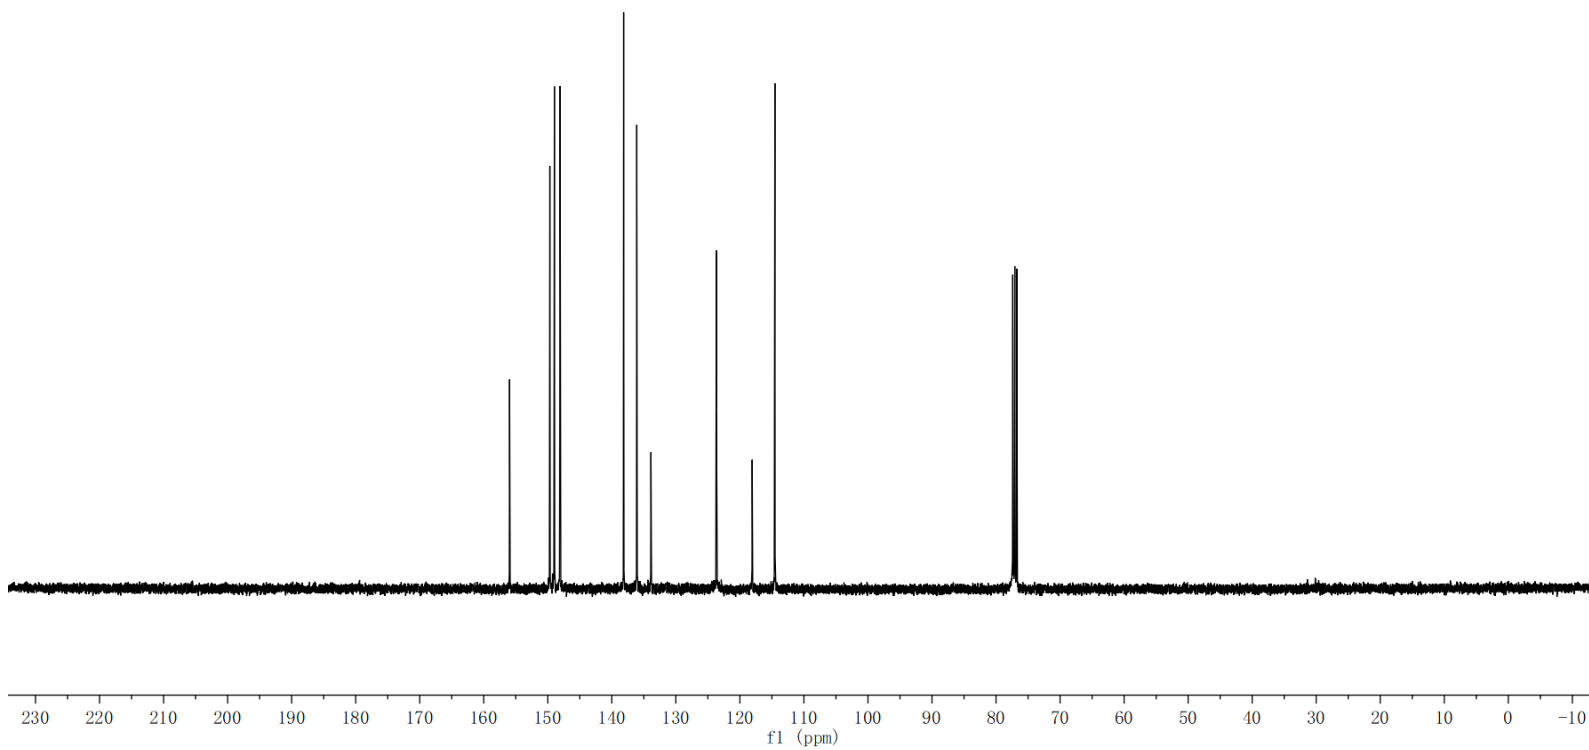

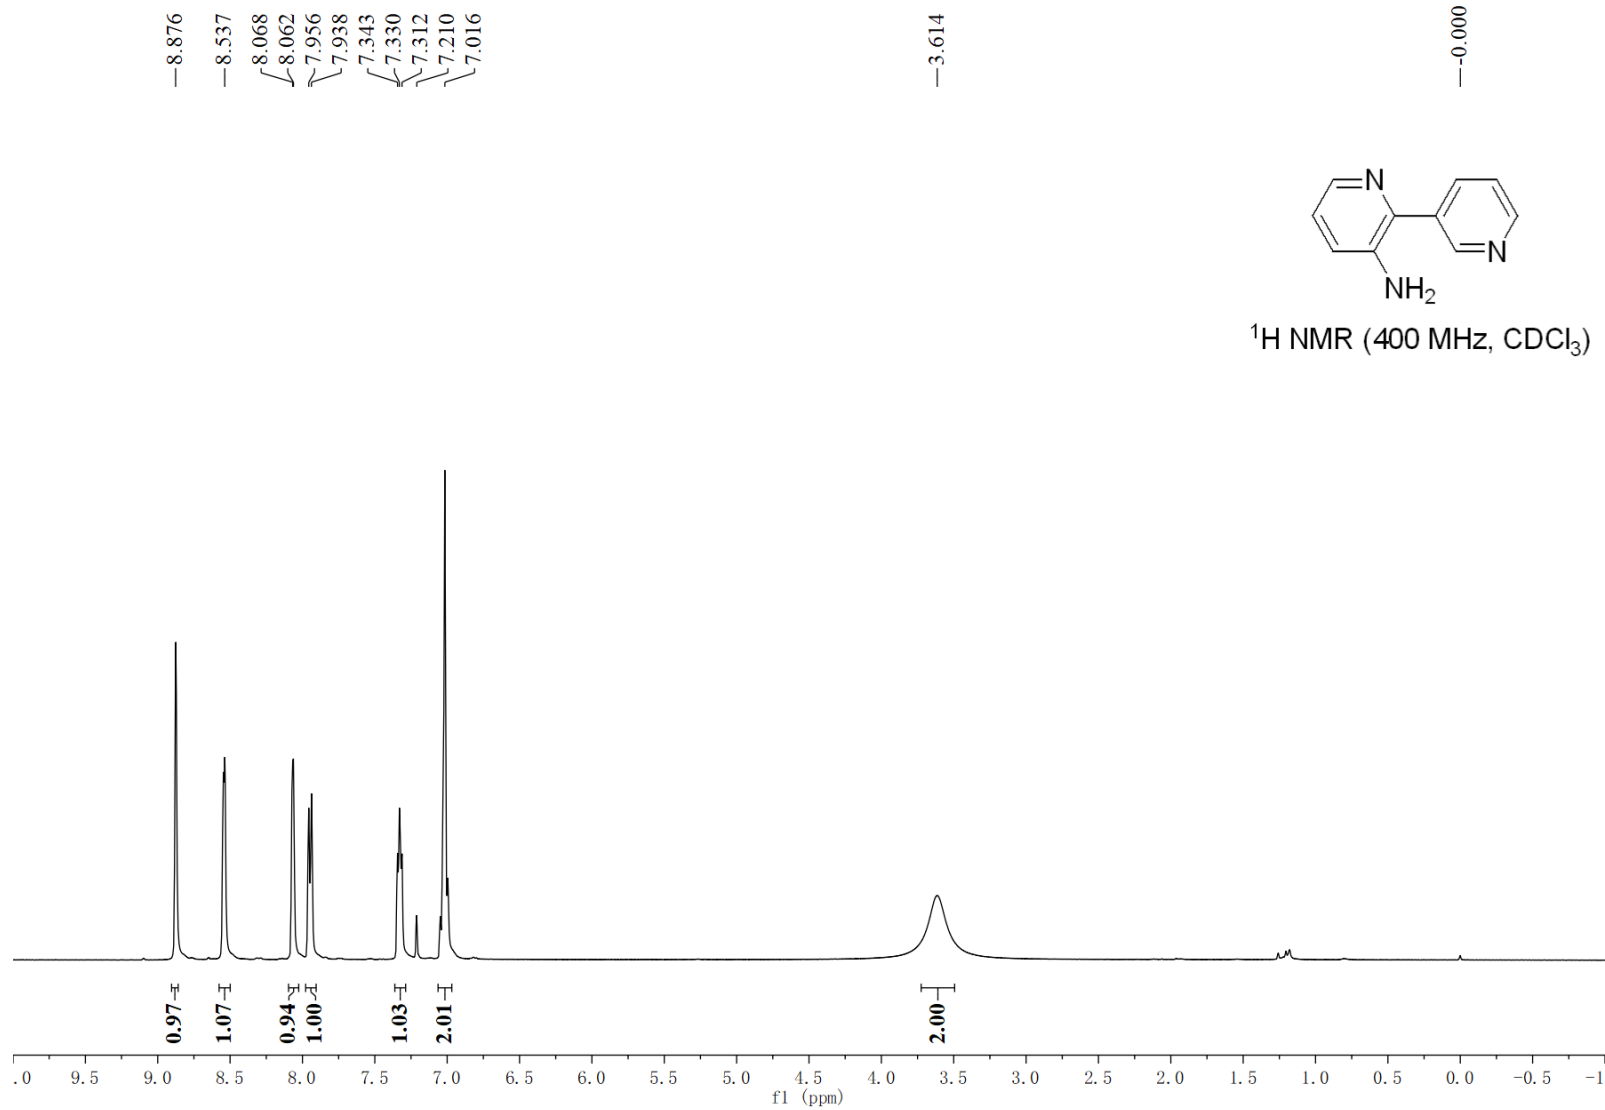



149.441  
149.157  
141.542  
140.506  
140.308  
136.209  
134.459  
123.749  
123.632  
123.139

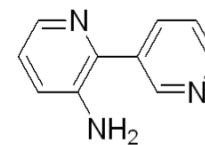

$^{13}\text{C}$  NMR (100 MHz,  $\text{CDCl}_3$ )

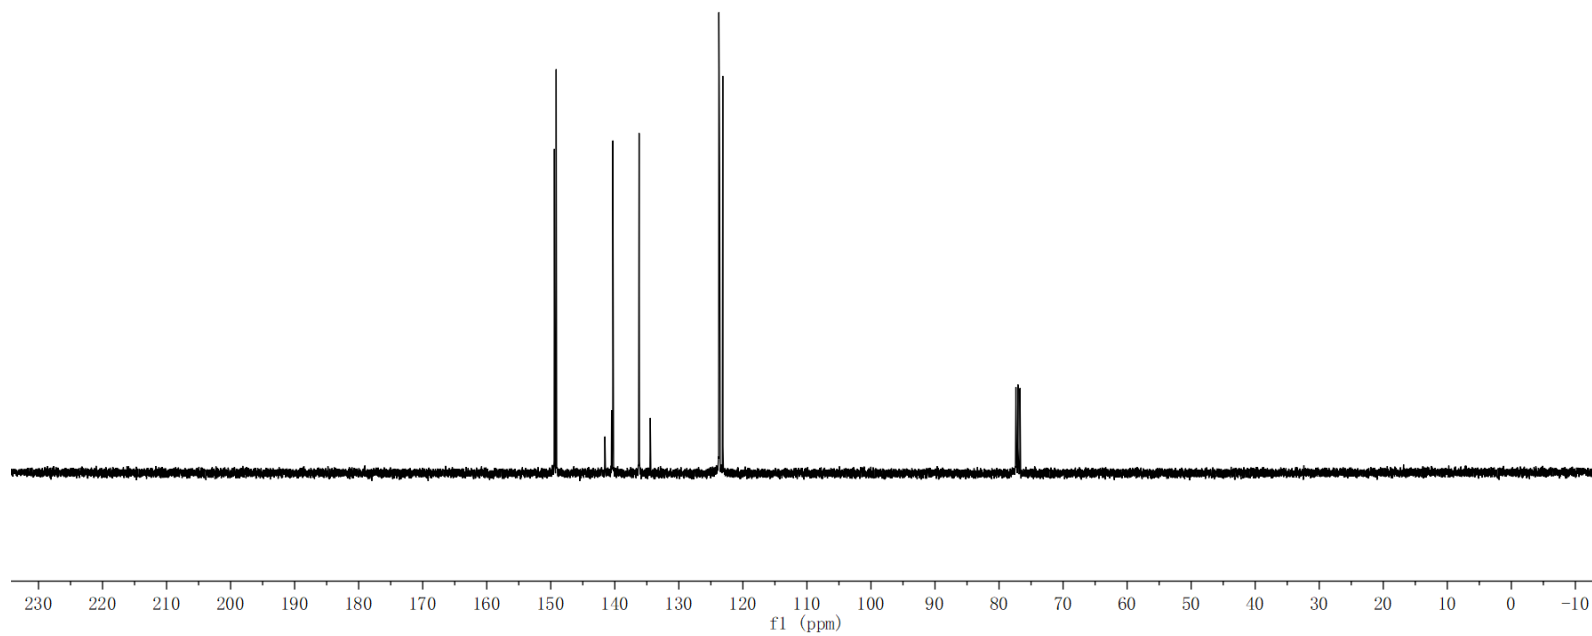

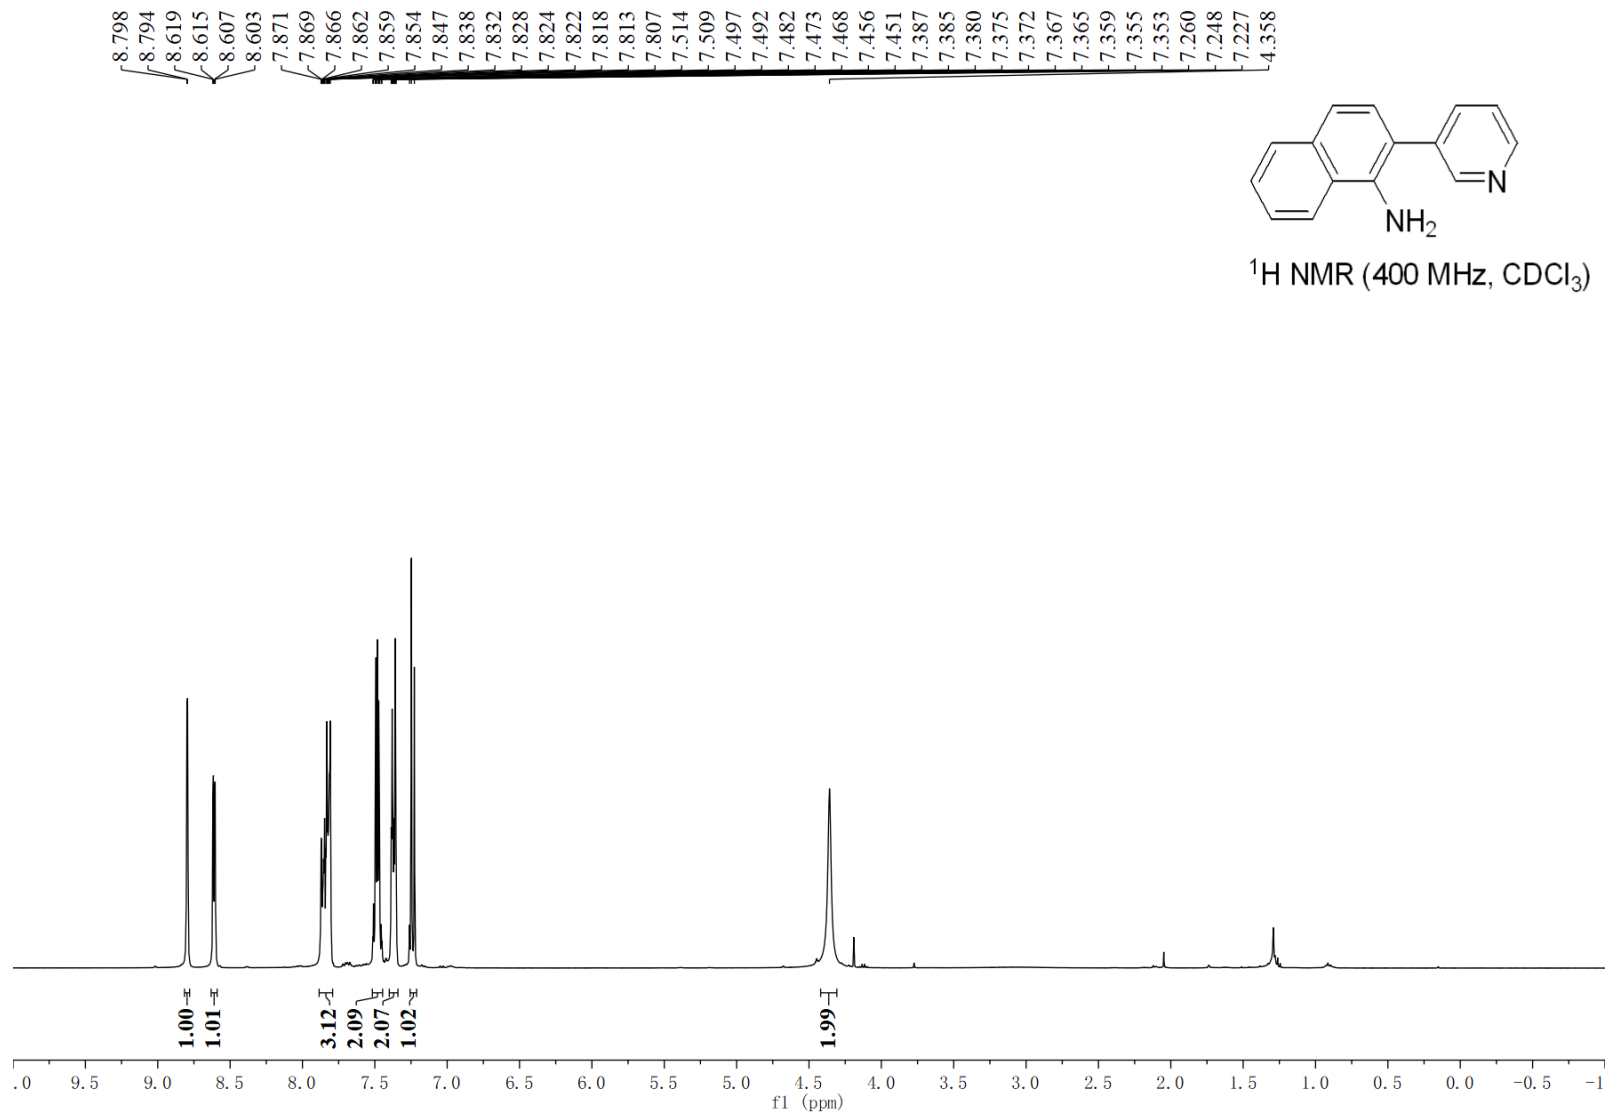

150.535  
148.310  
139.255  
137.108  
135.918  
134.026  
128.568  
128.183  
126.294  
125.518  
123.762  
123.433  
121.205  
118.732  
117.803

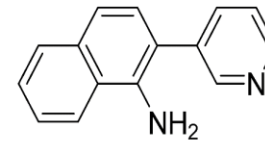

$^{13}\text{C}$  NMR (100 MHz,  $\text{CDCl}_3$ )

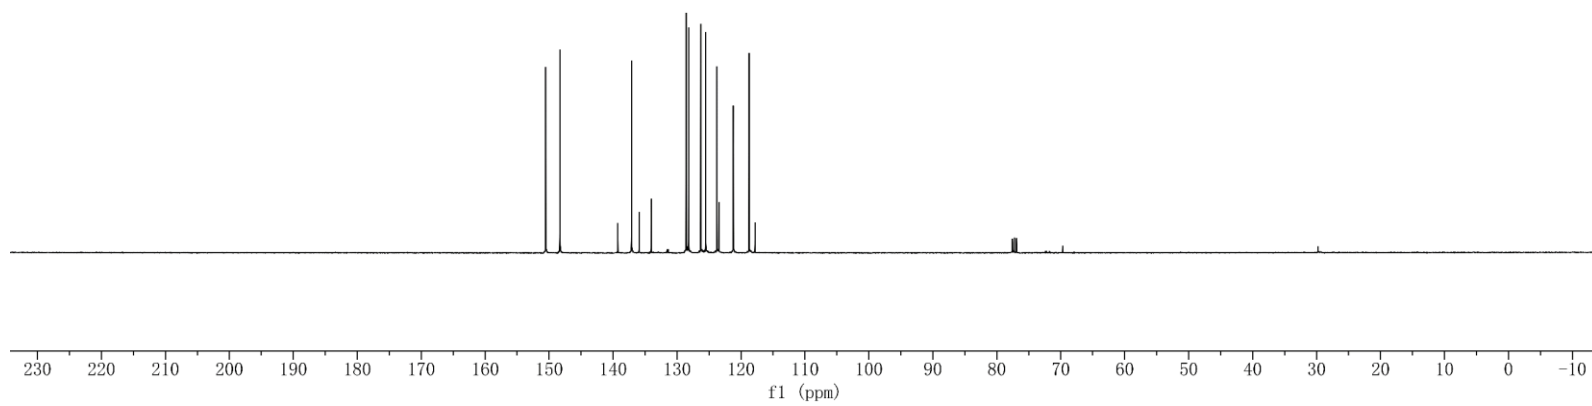

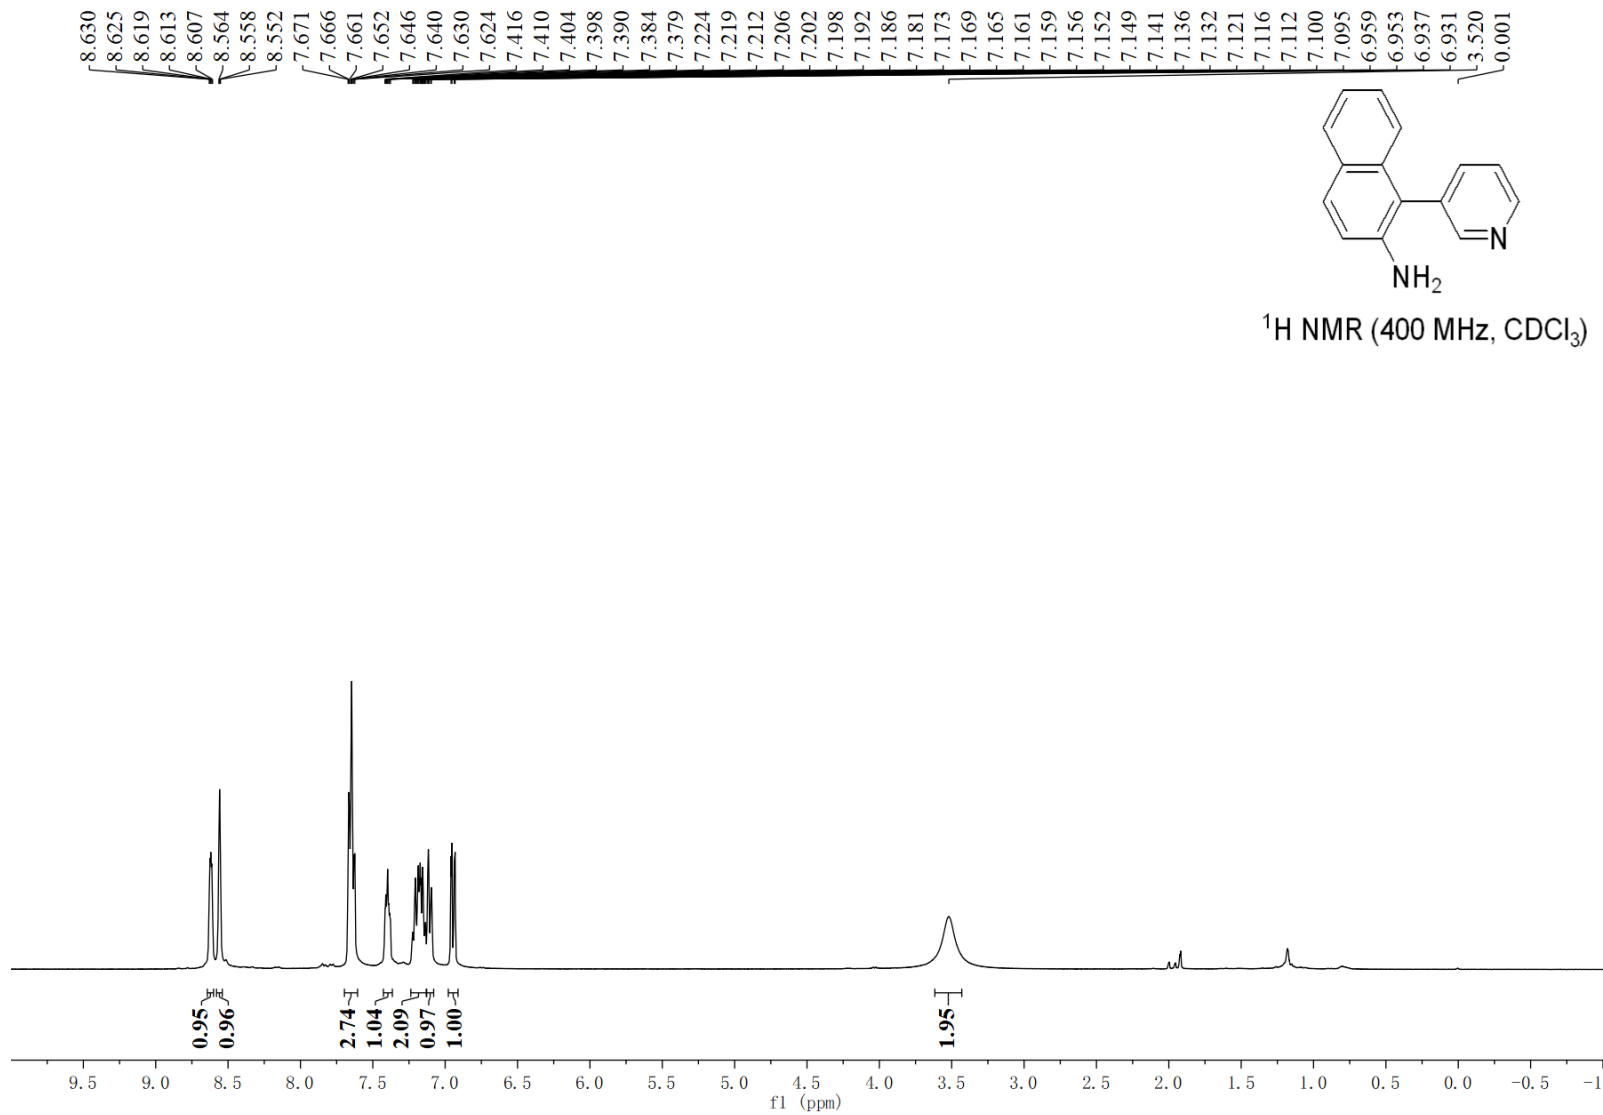

151.857  
148.834  
141.687  
139.004  
133.728  
133.128  
129.613  
128.093  
127.904  
126.756  
124.119  
123.459  
122.401  
118.076  
115.382

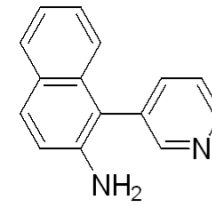

$^{13}\text{C}$  NMR (100 MHz,  $\text{CDCl}_3$ )

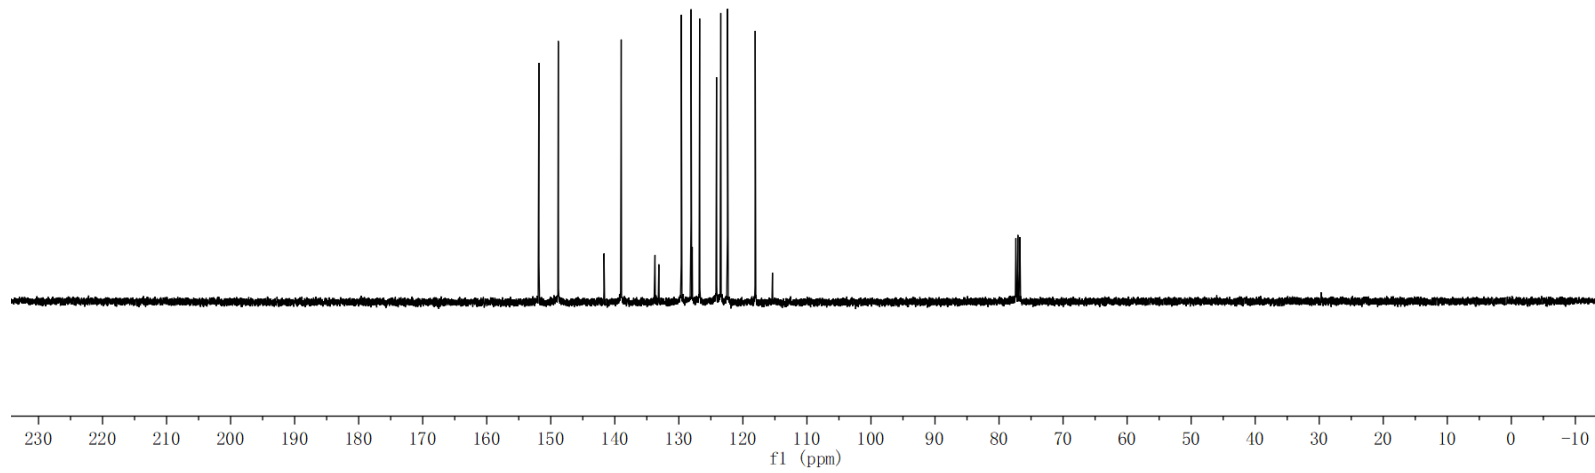

8.830  
8.826  
8.819  
8.816  
8.723  
8.720  
8.717  
8.701  
8.698  
8.692  
8.690  
8.686  
8.684  
8.588  
8.584  
8.576  
8.572  
7.925  
7.920  
7.915  
7.905  
7.900  
7.895  
7.528  
7.515  
7.508  
7.495  
7.450  
7.440  
7.429  
7.417  
7.395  
7.338  
7.316  
5.763

-2.500

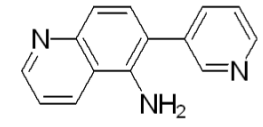

<sup>1</sup>H NMR (400 MHz, d<sub>6</sub>-DMSO)

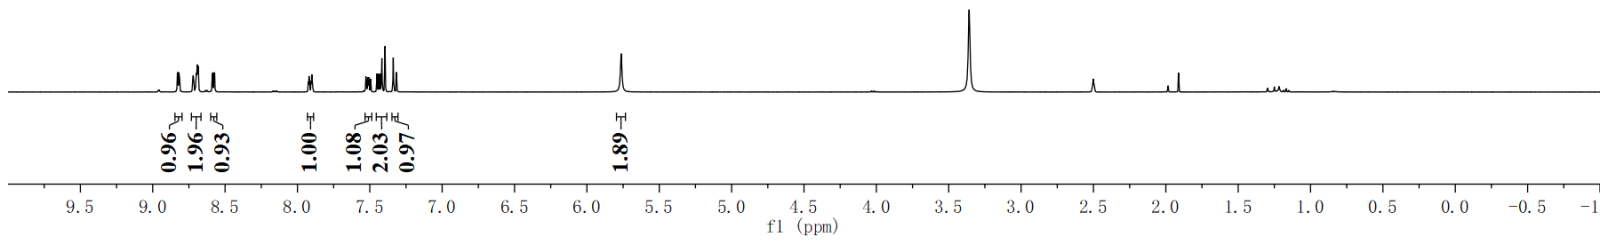

150.628  
150.358  
148.964  
148.310  
142.112  
137.240  
135.884  
132.563  
131.824  
124.339  
119.950  
118.269  
117.392  
116.274

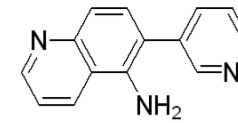

$^{13}\text{C}$  NMR (100 MHz,  $d_6$ -DMSO)

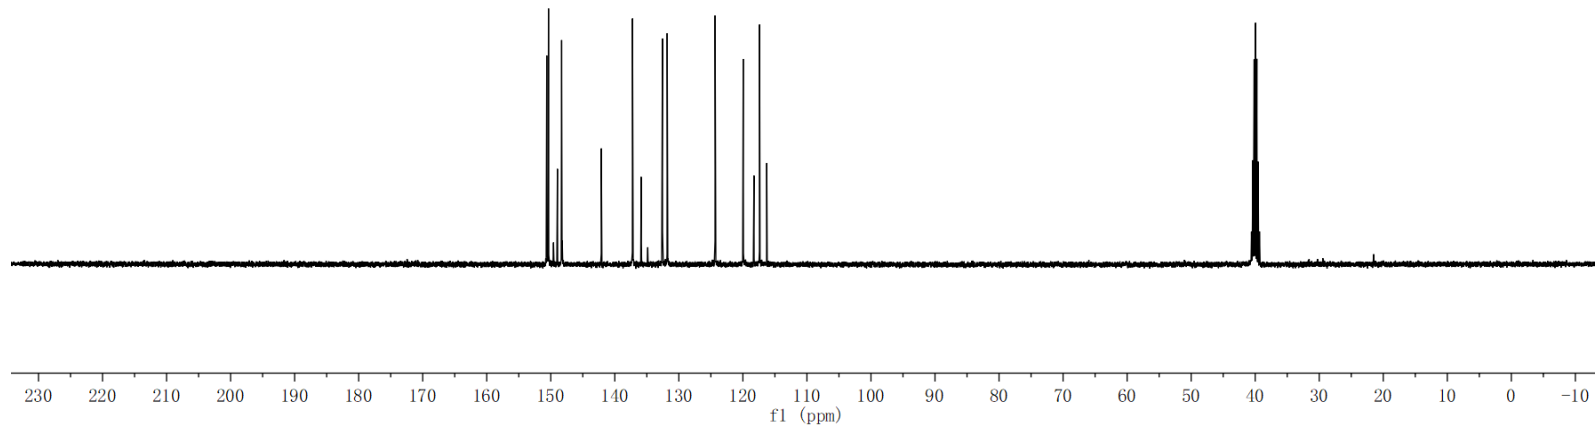

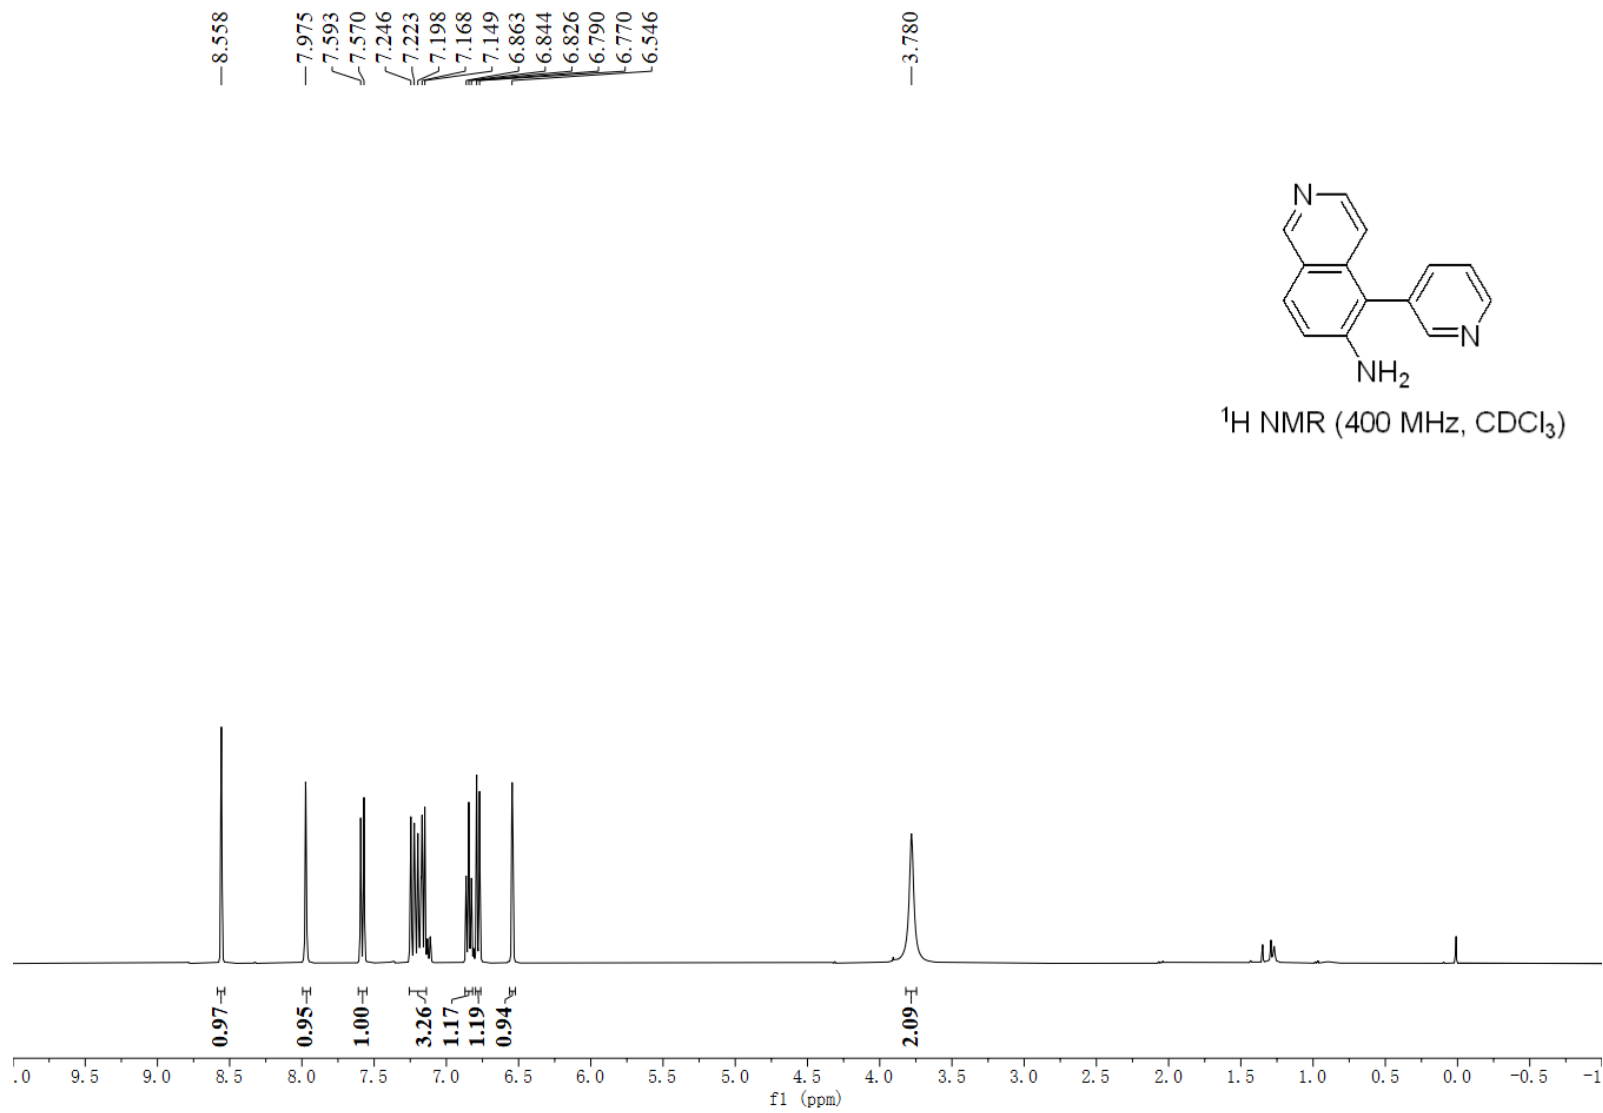



151.714  
151.147  
149.503  
145.903  
143.060  
138.709  
137.013  
131.333  
129.804  
124.285  
123.101  
119.077  
116.495  
113.150

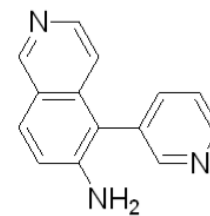

$^{13}\text{C}$  NMR (101 MHz,  $\text{CDCl}_3$ )

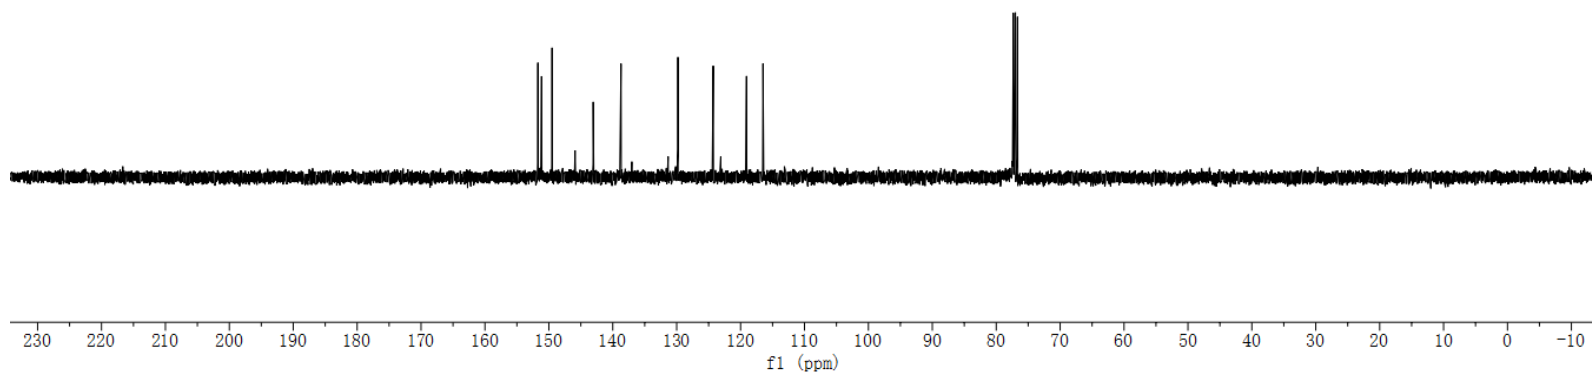

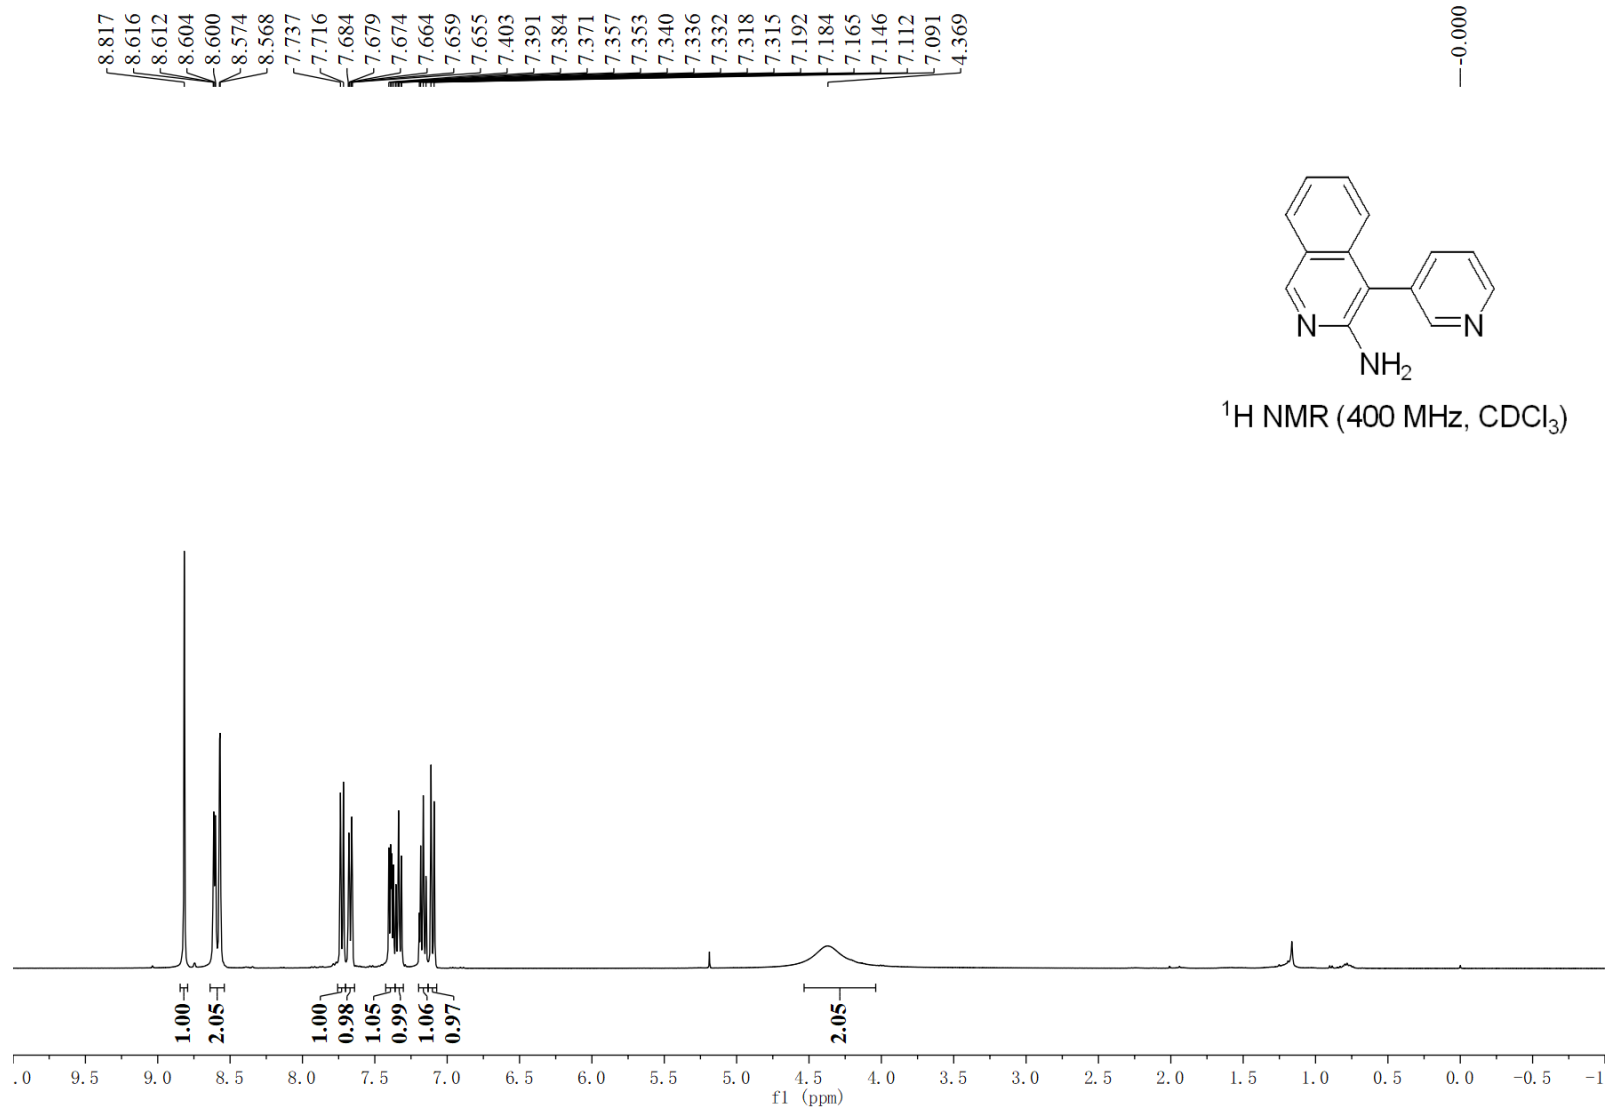

152.126  
152.111  
151.636  
149.193  
138.537  
137.259  
131.774  
130.924  
128.071  
124.144  
123.656  
122.924  
122.209  
107.253

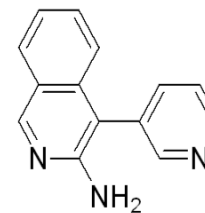

<sup>13</sup>C NMR (100 MHz, CDCl<sub>3</sub>)

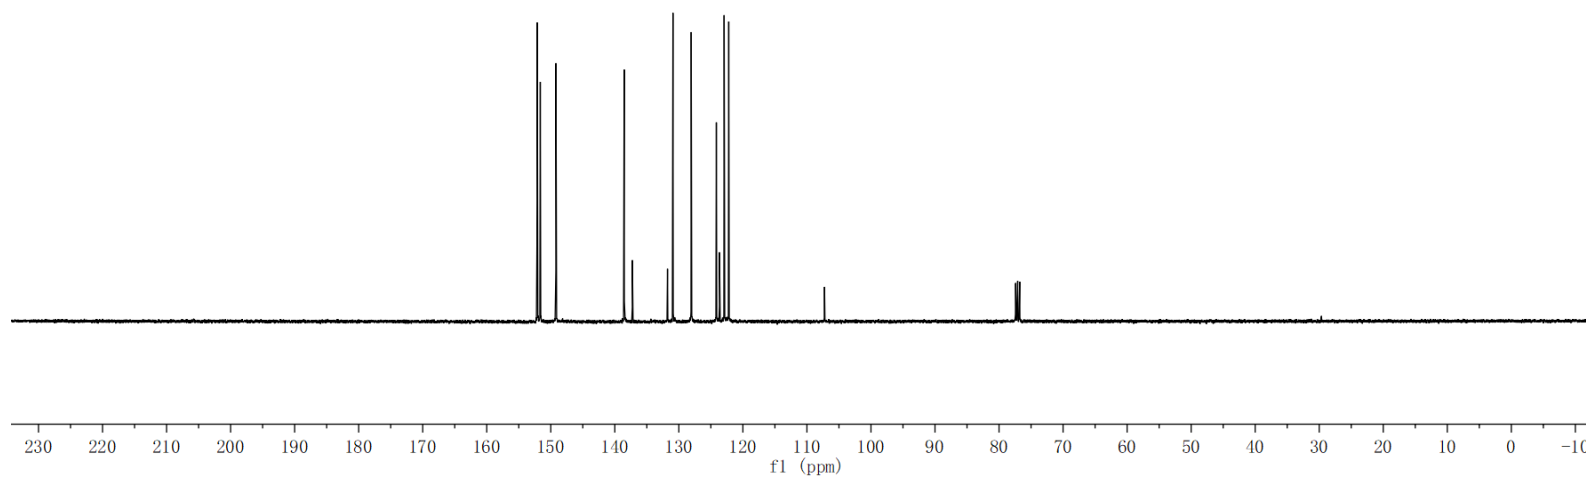

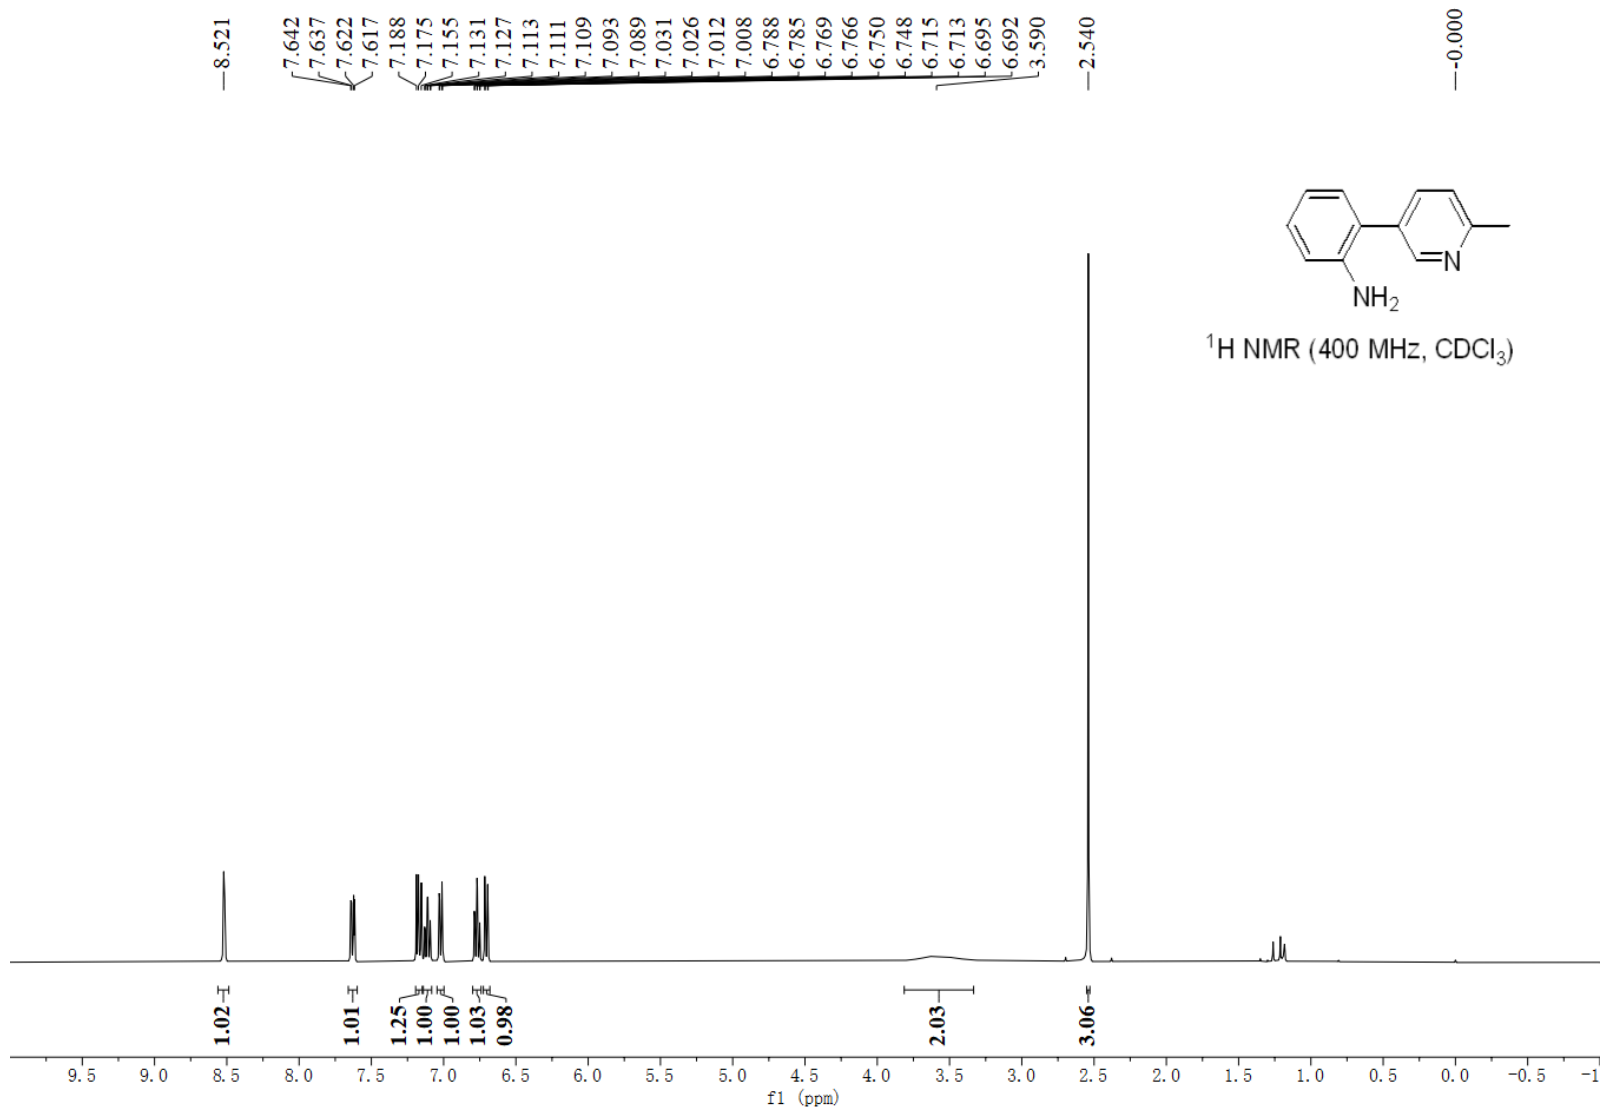

—157.070  
—149.119  
—143.781  
~136.967  
/132.196  
/130.512  
~129.125  
~123.791  
~123.170  
~118.865  
~115.758

—24.105

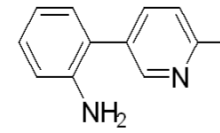

<sup>13</sup>C NMR (100 MHz, CDCl<sub>3</sub>)

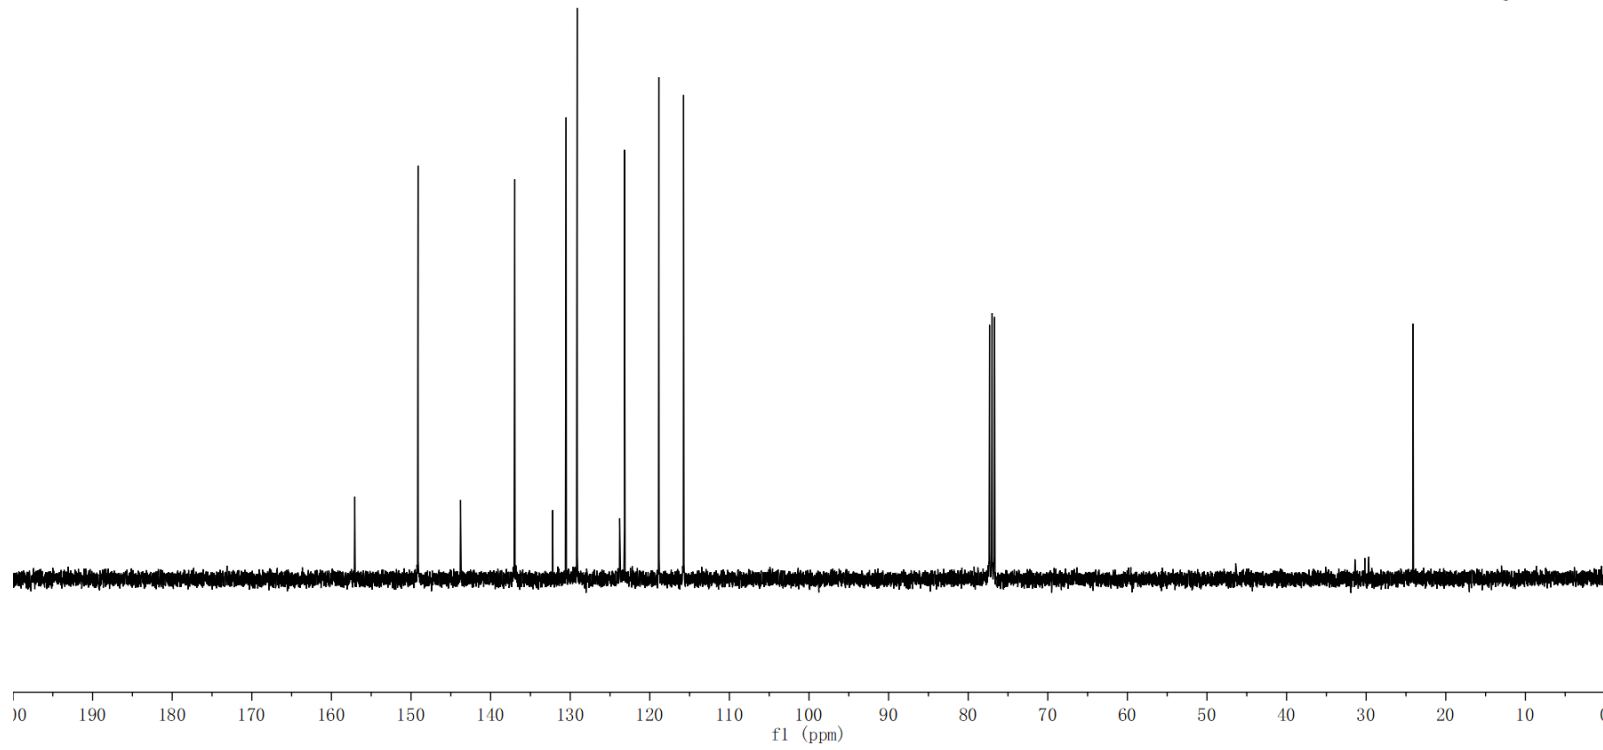

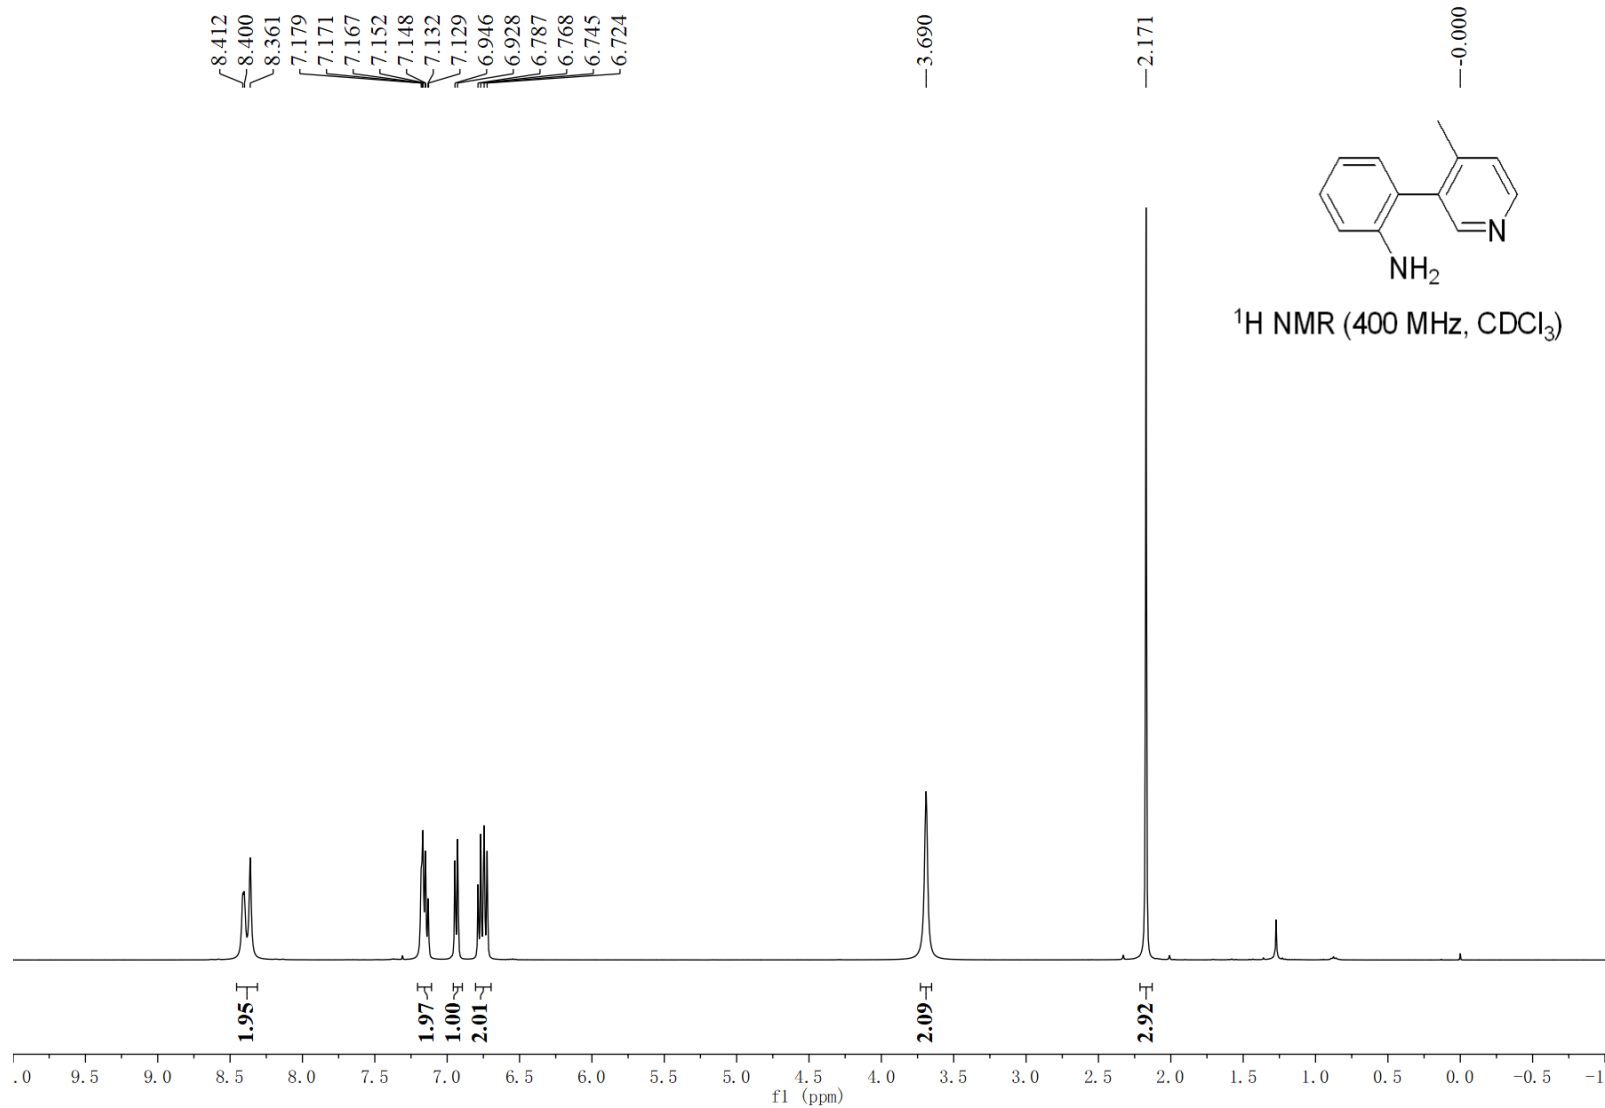

150.304  
148.545  
146.720  
144.287  
134.957  
130.244  
129.161  
125.171  
122.874  
118.082  
115.233

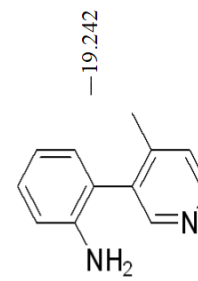

<sup>13</sup>C NMR (100 MHz, CDCl<sub>3</sub>)

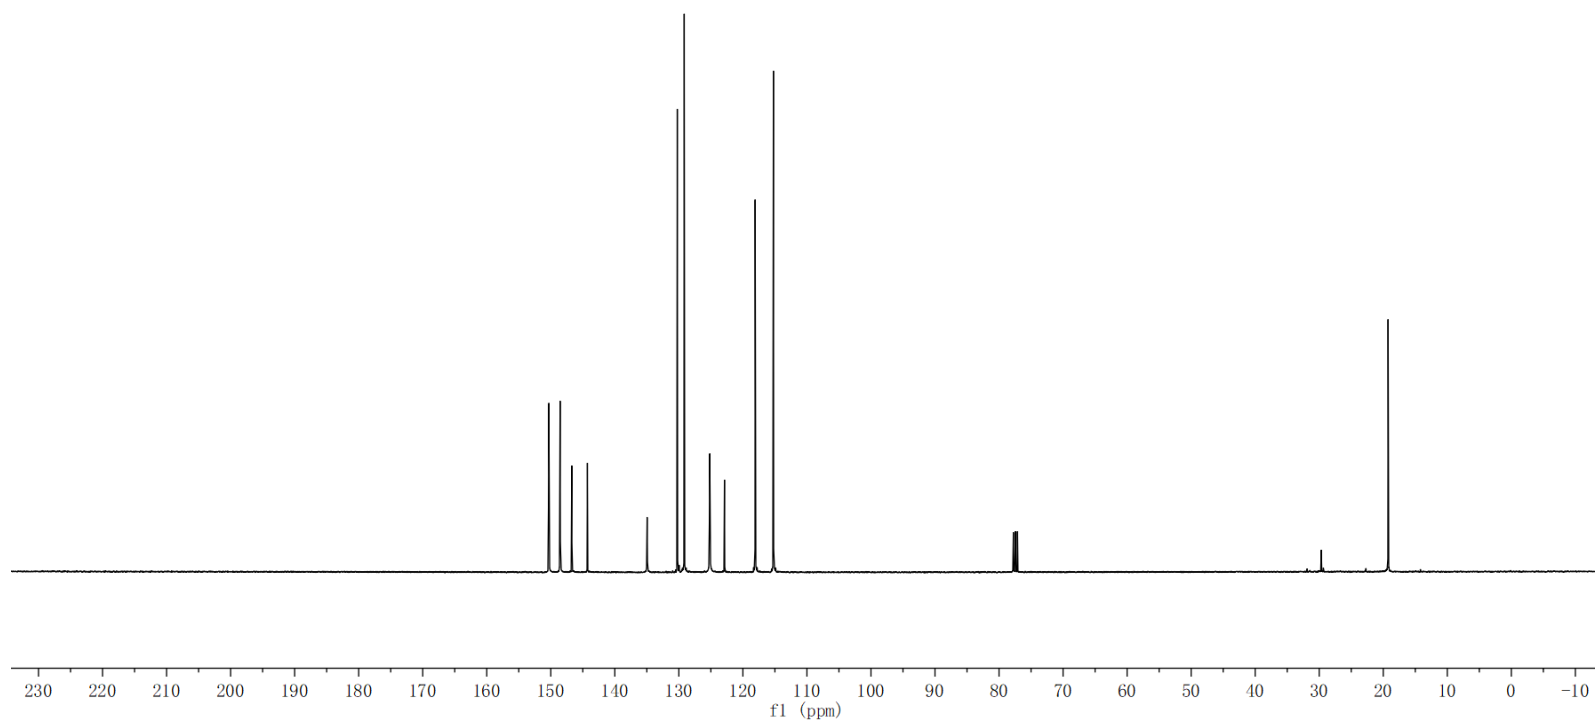

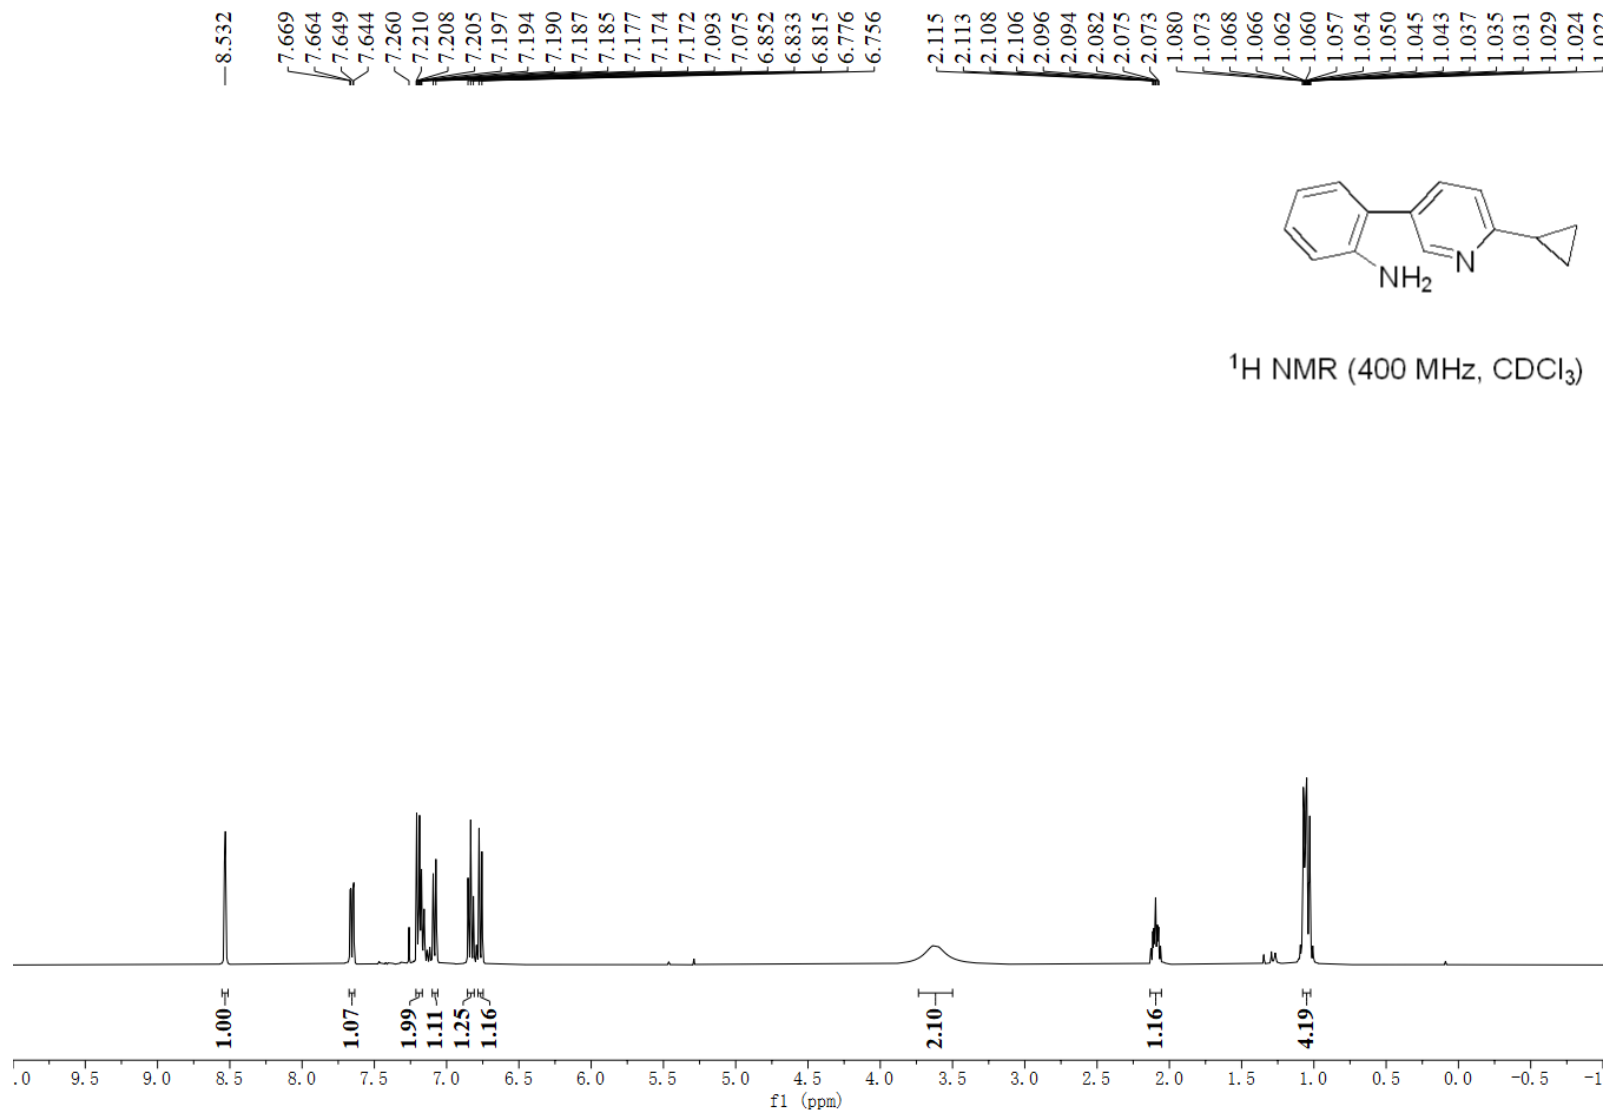



— 161.666  
/ 149.301  
/ 143.853  
/ 136.532  
/ 131.800  
/ 130.502  
/ 129.019  
/ 124.014  
/ 121.044  
/ 118.828  
/ 115.728

— 16.968  
— 9.923

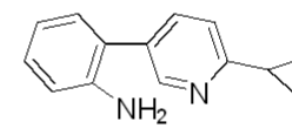

<sup>13</sup>C NMR (101 MHz, CDCl<sub>3</sub>)

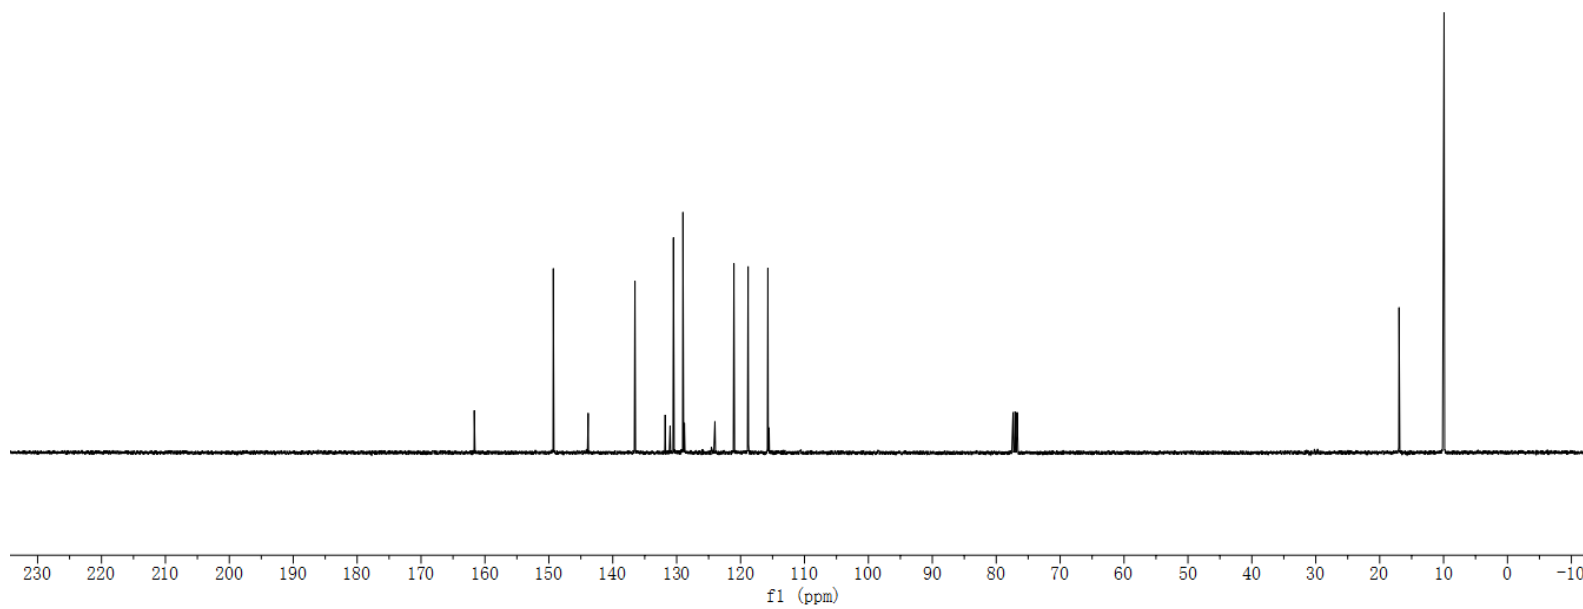

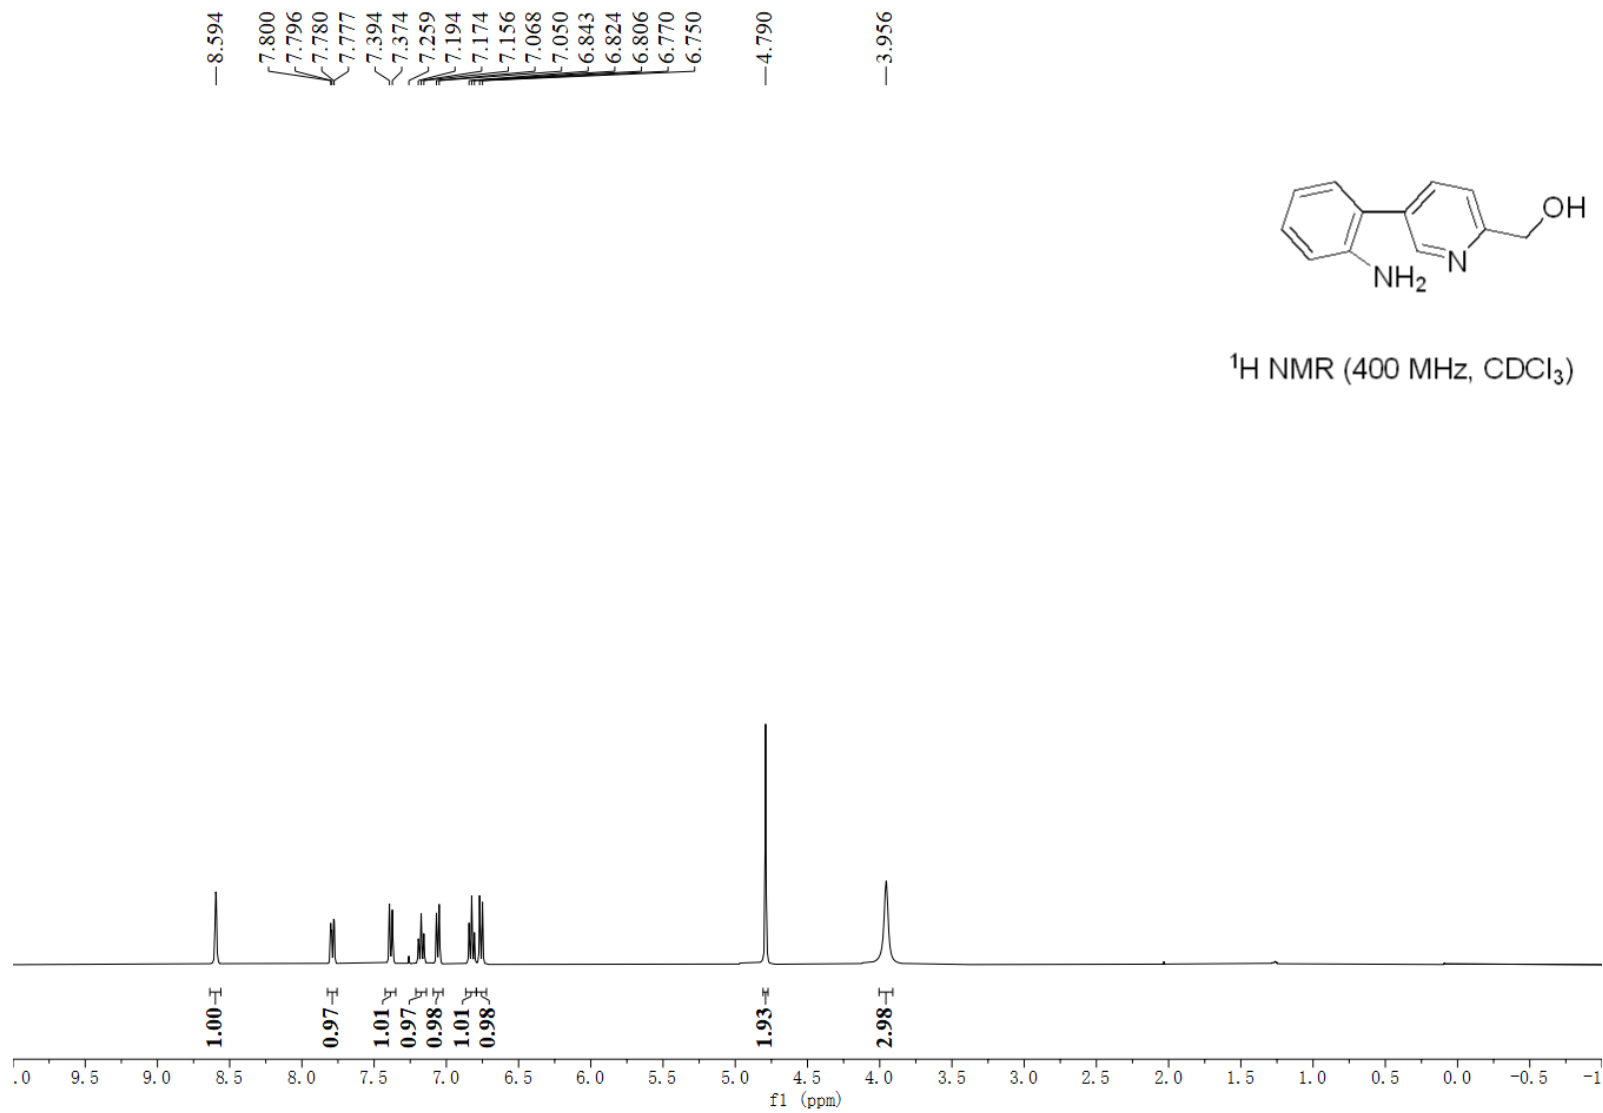

—157.795  
/ 148.645  
/ 143.787  
/ 137.464  
/ 134.030  
/ 130.546  
/ 129.398  
/ 123.415  
/ 120.487  
/ 118.976  
/ 115.906

—64.108

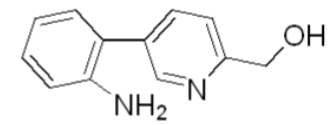

<sup>13</sup>C NMR (101 MHz, CDCl<sub>3</sub>)

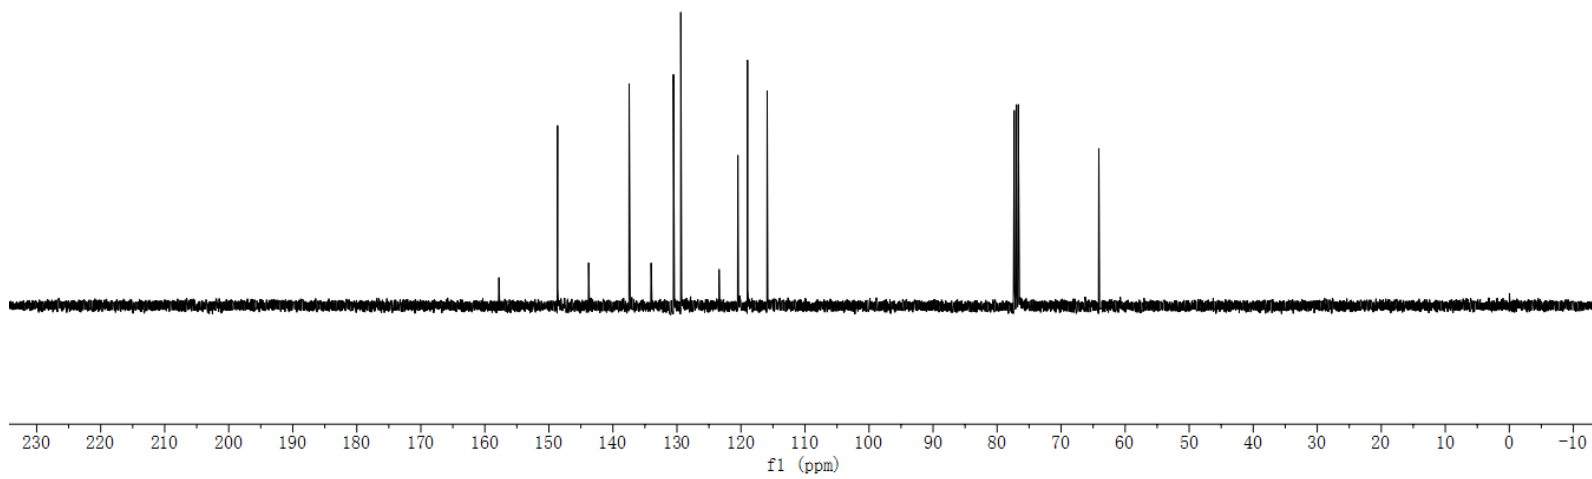

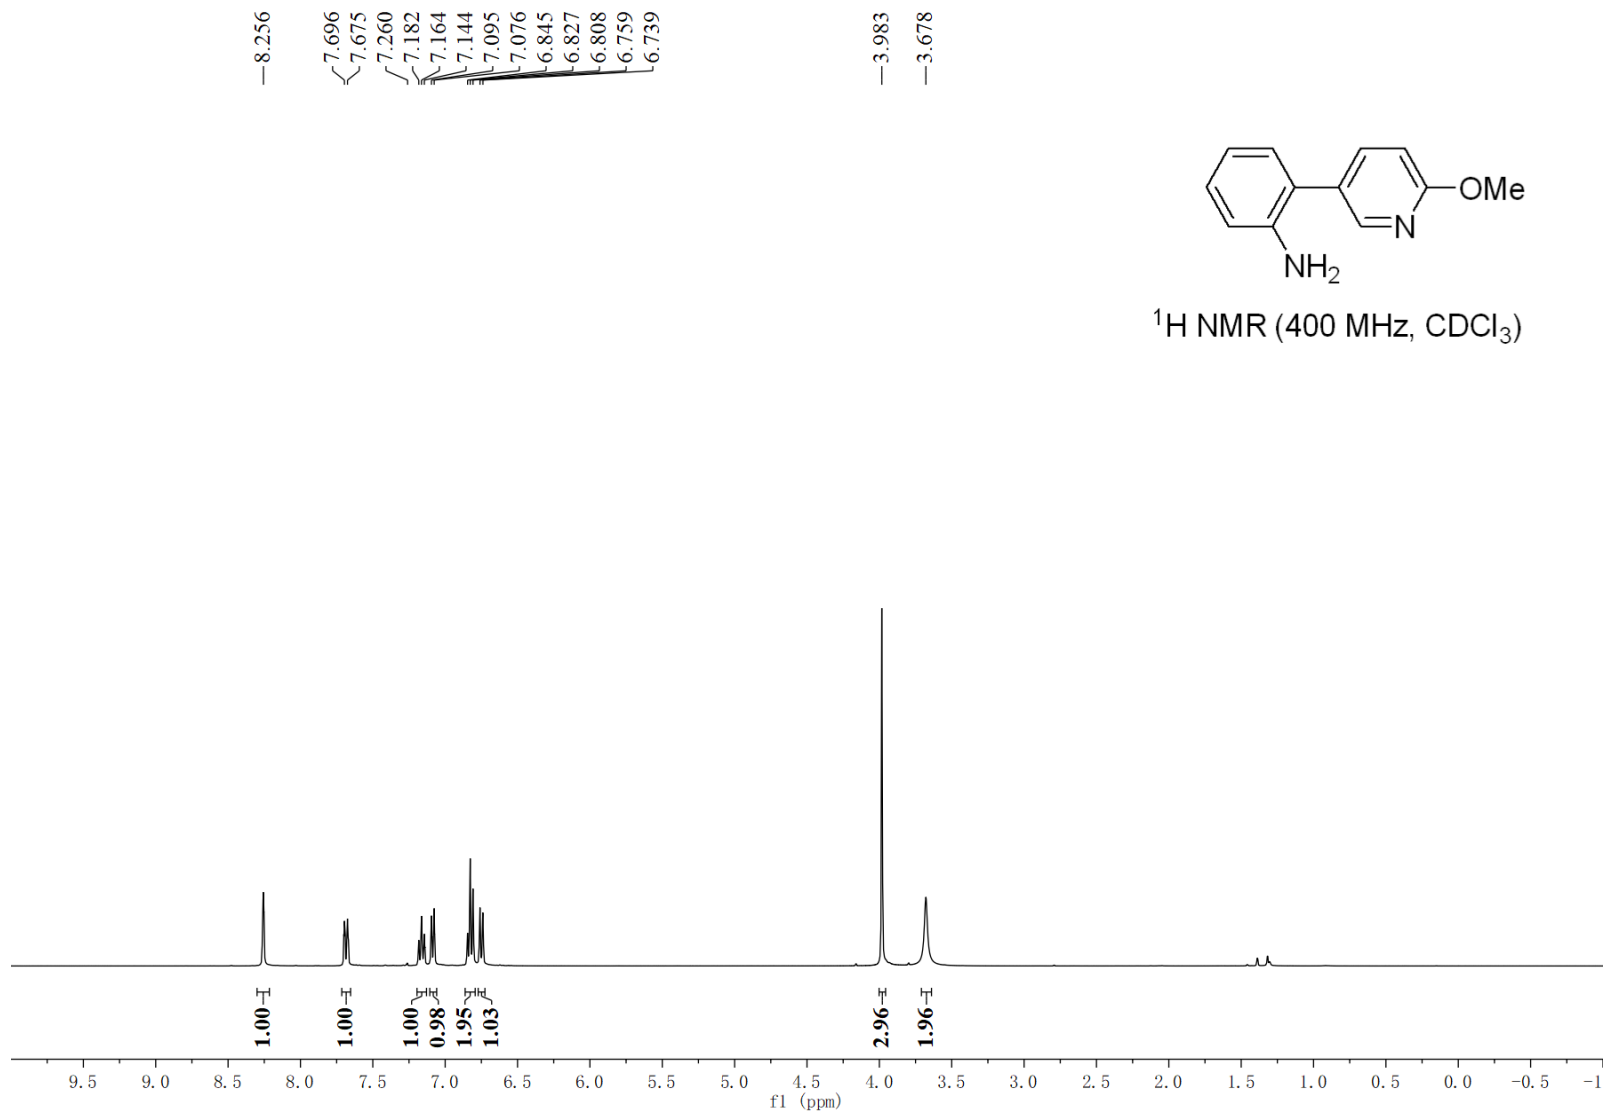

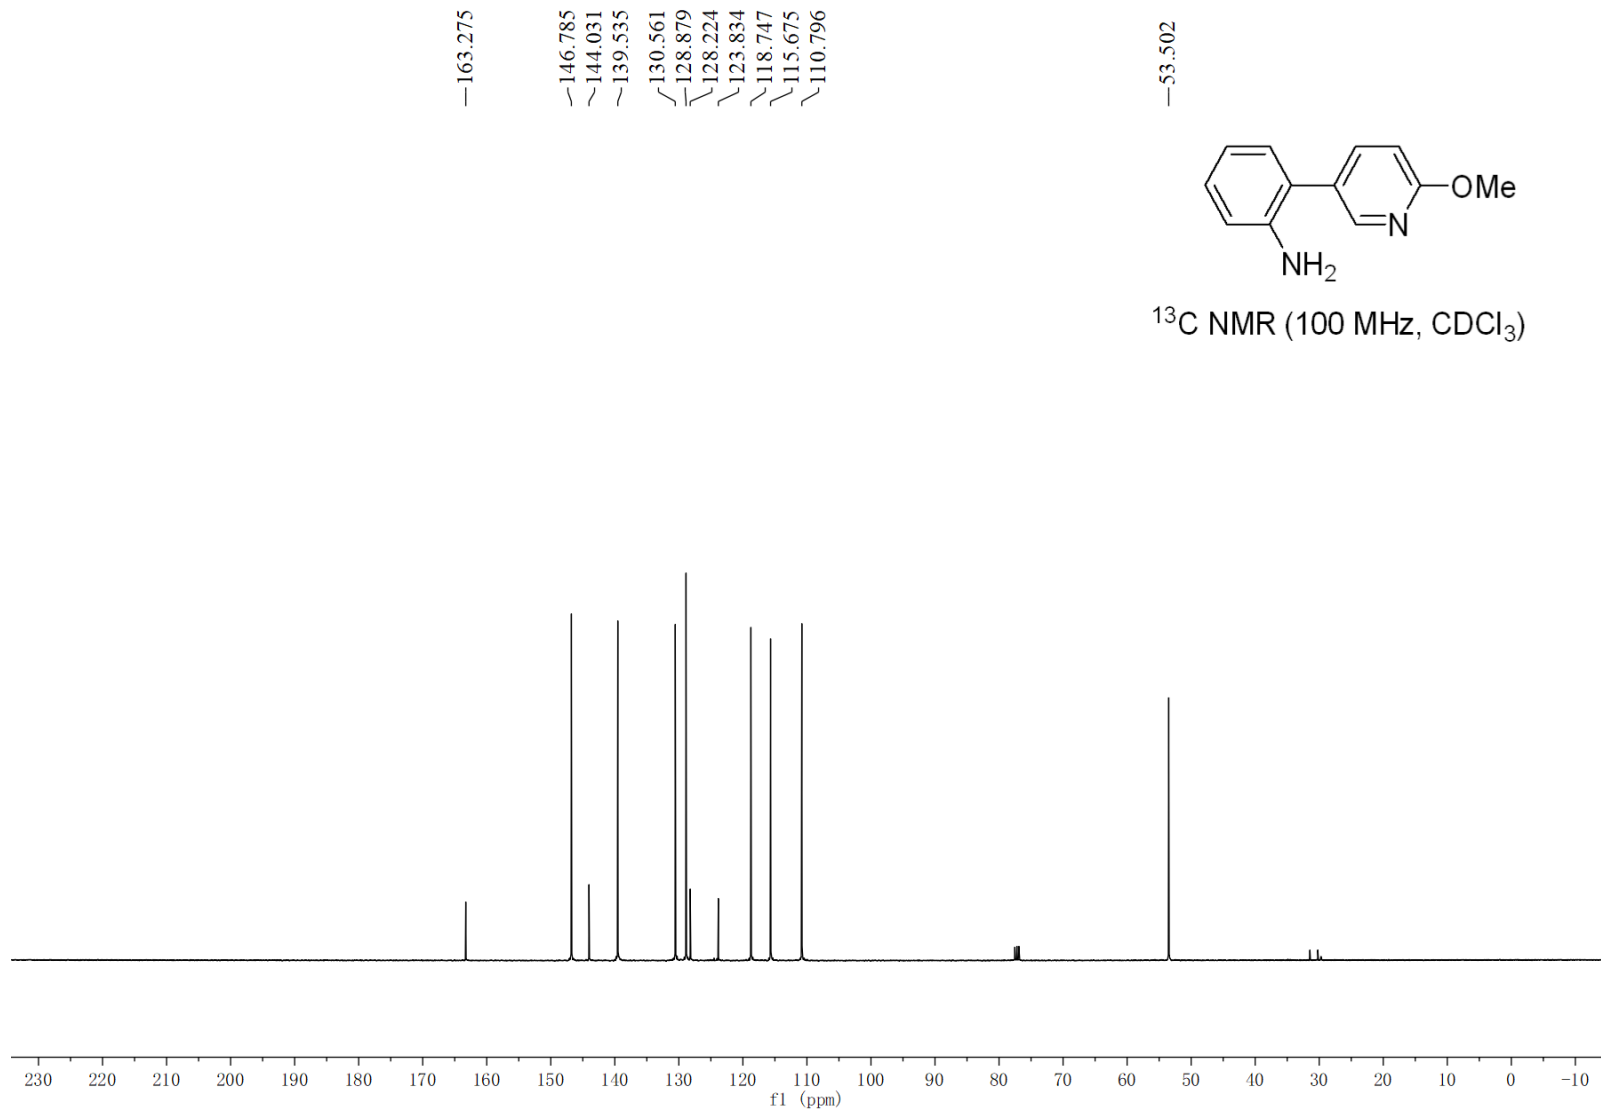

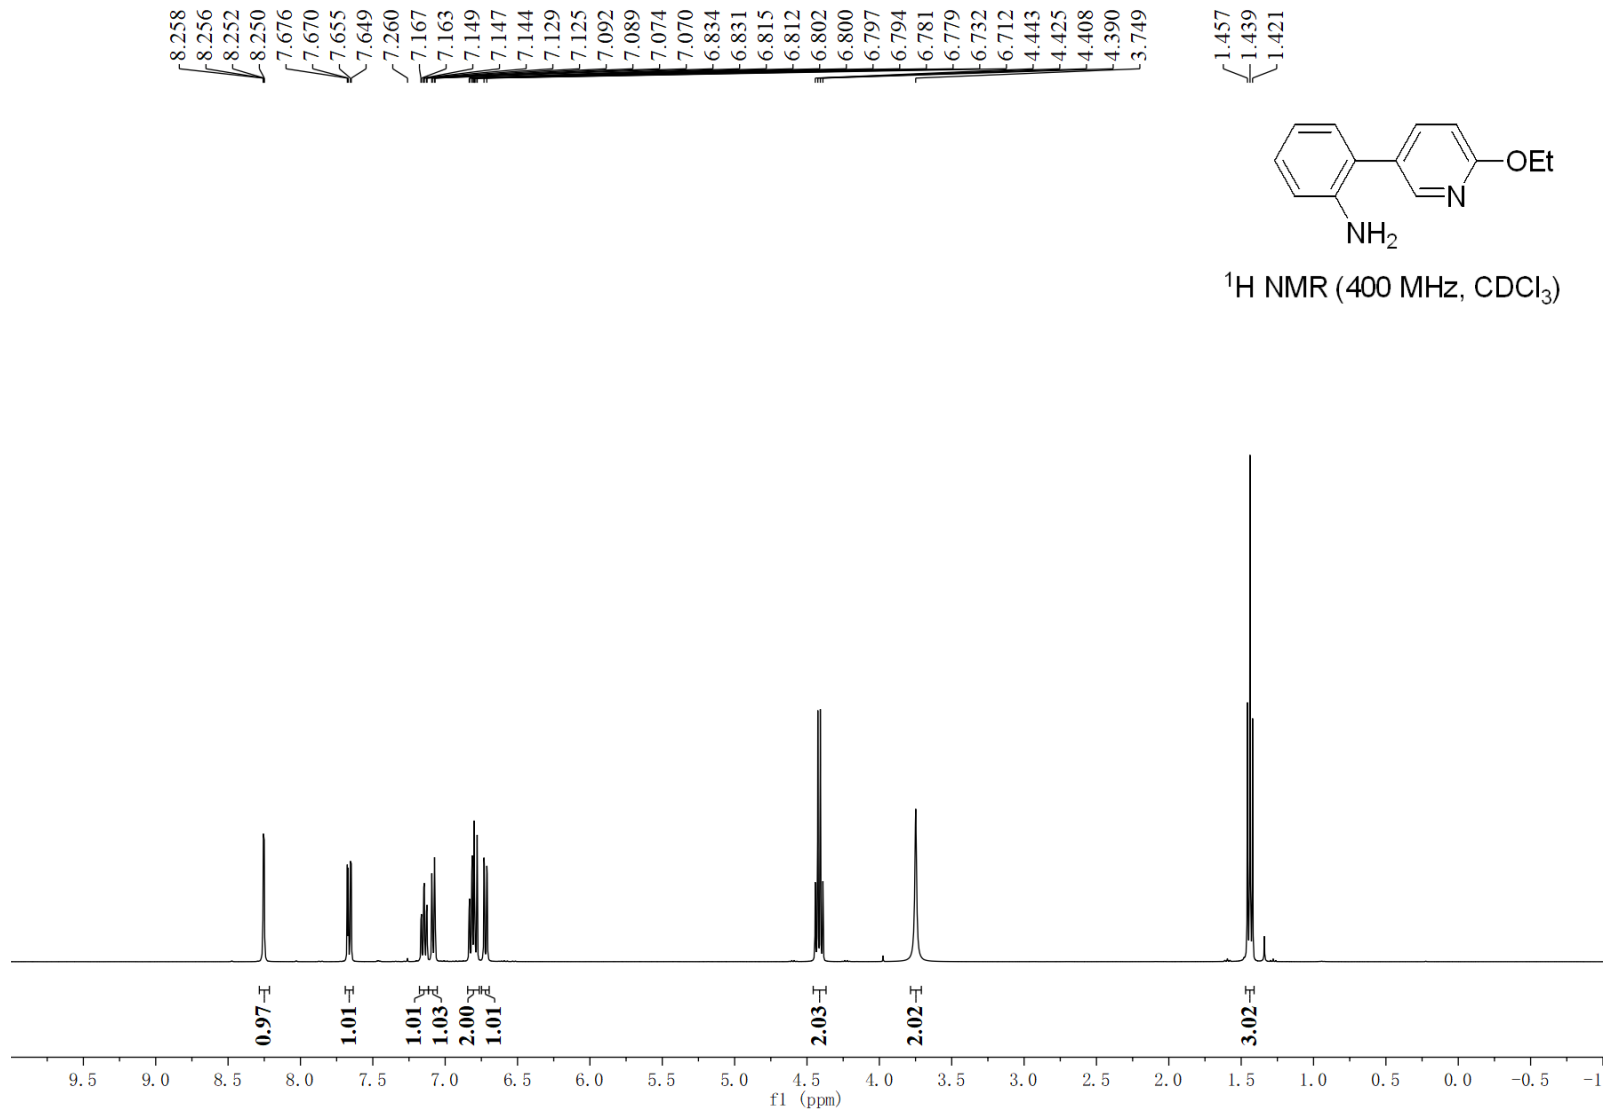

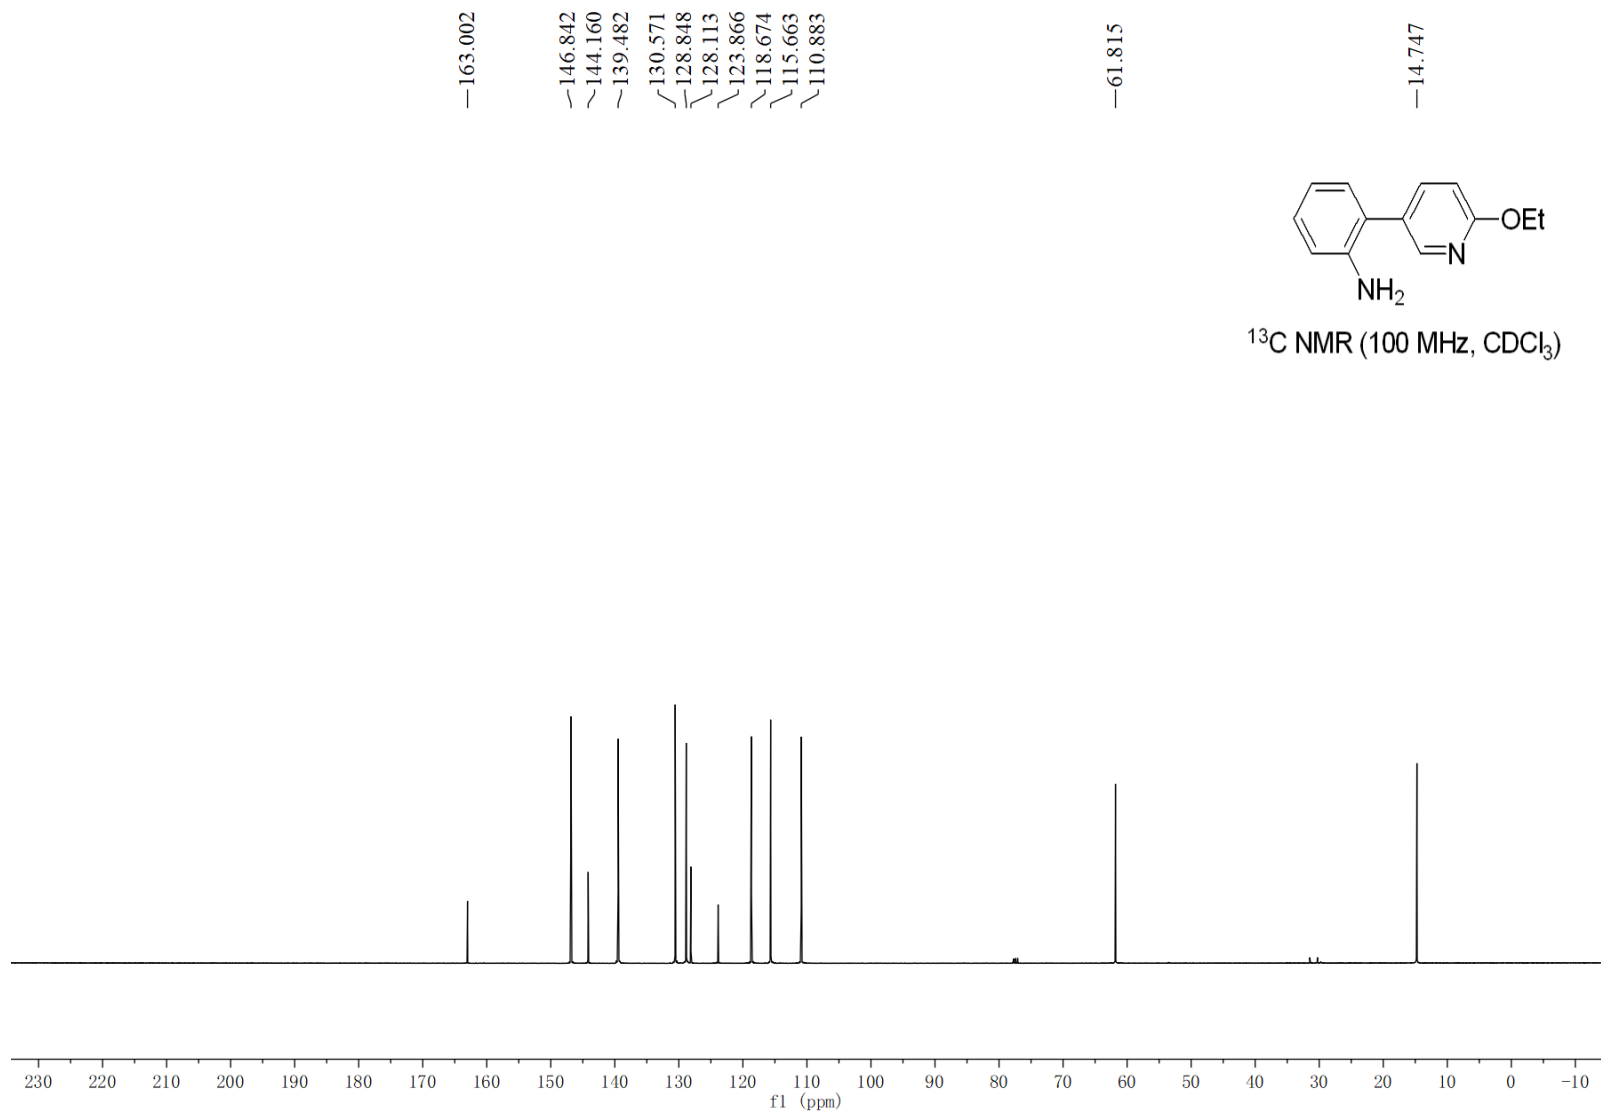

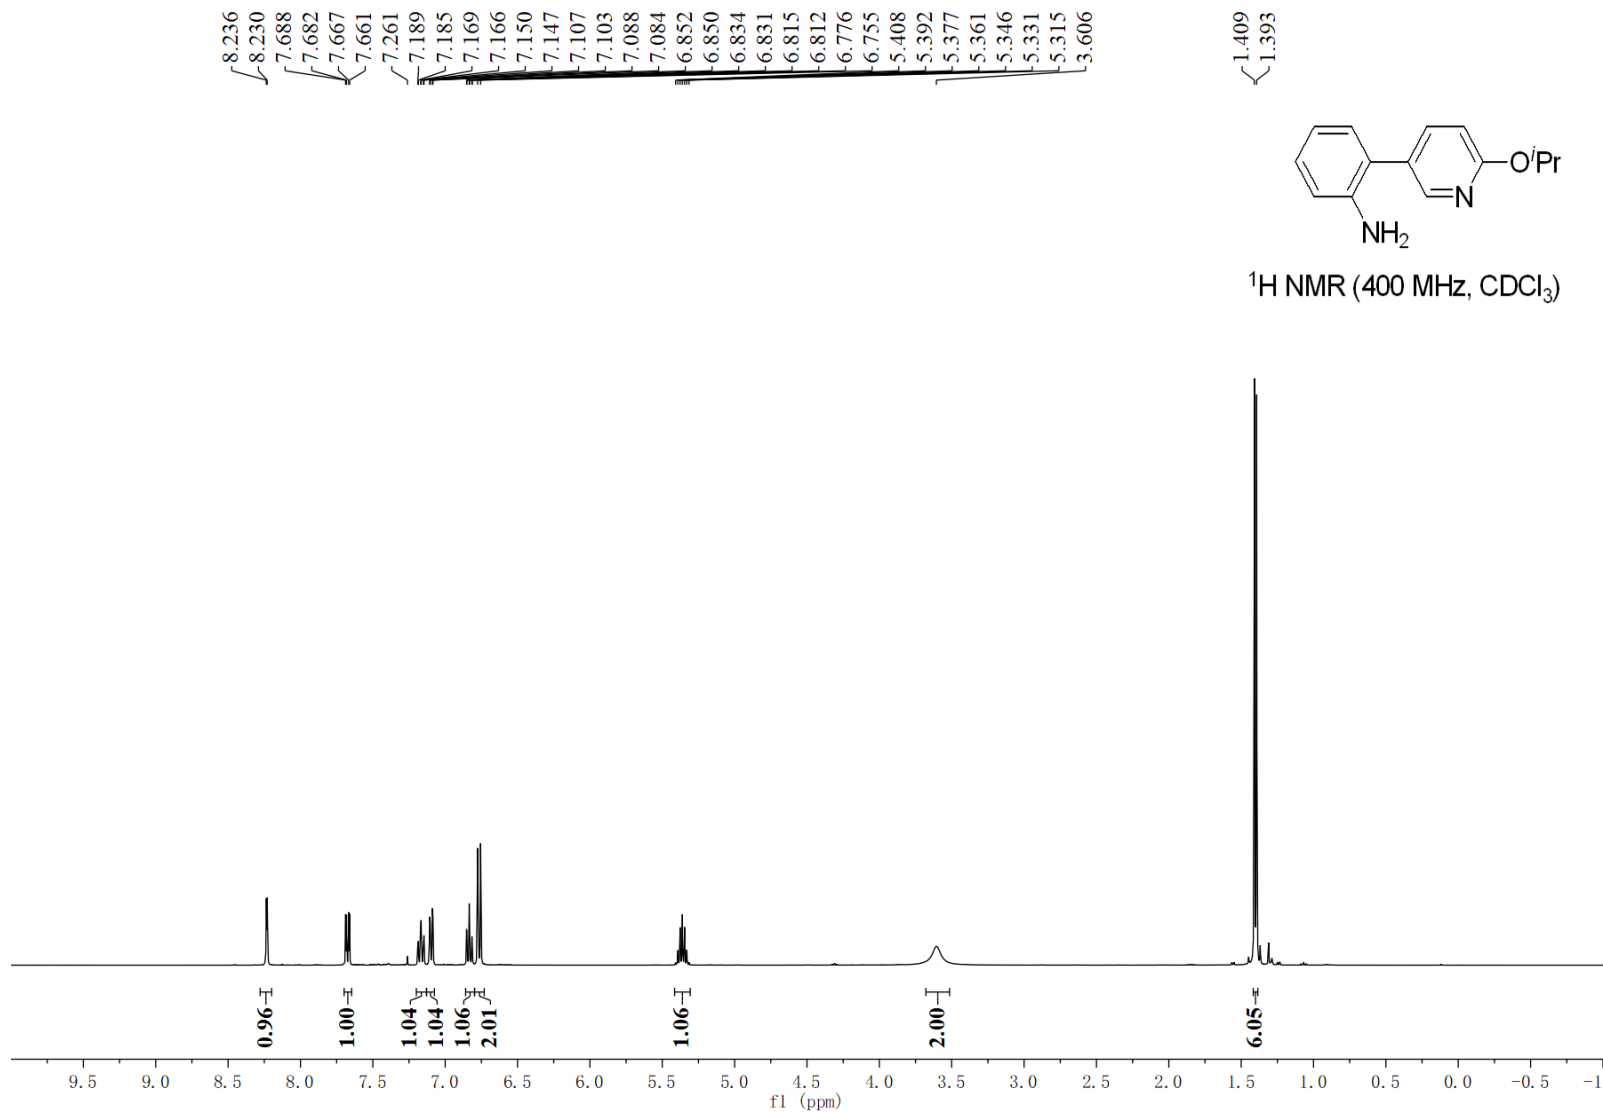



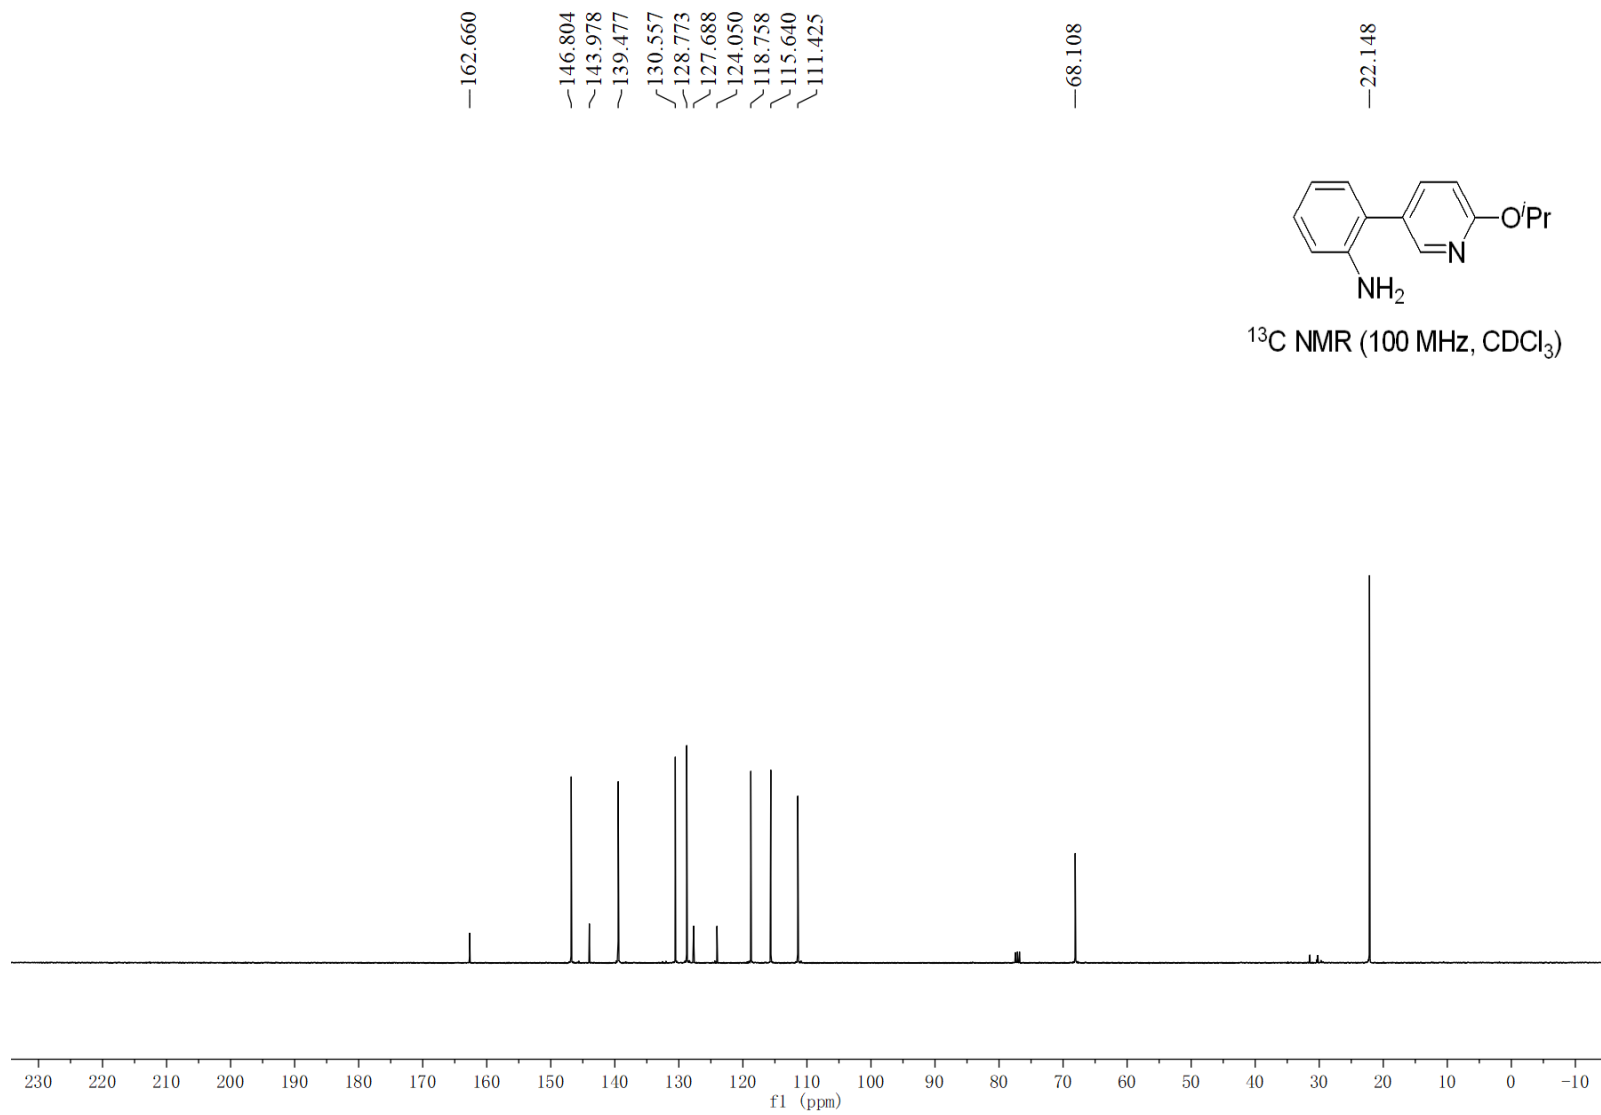

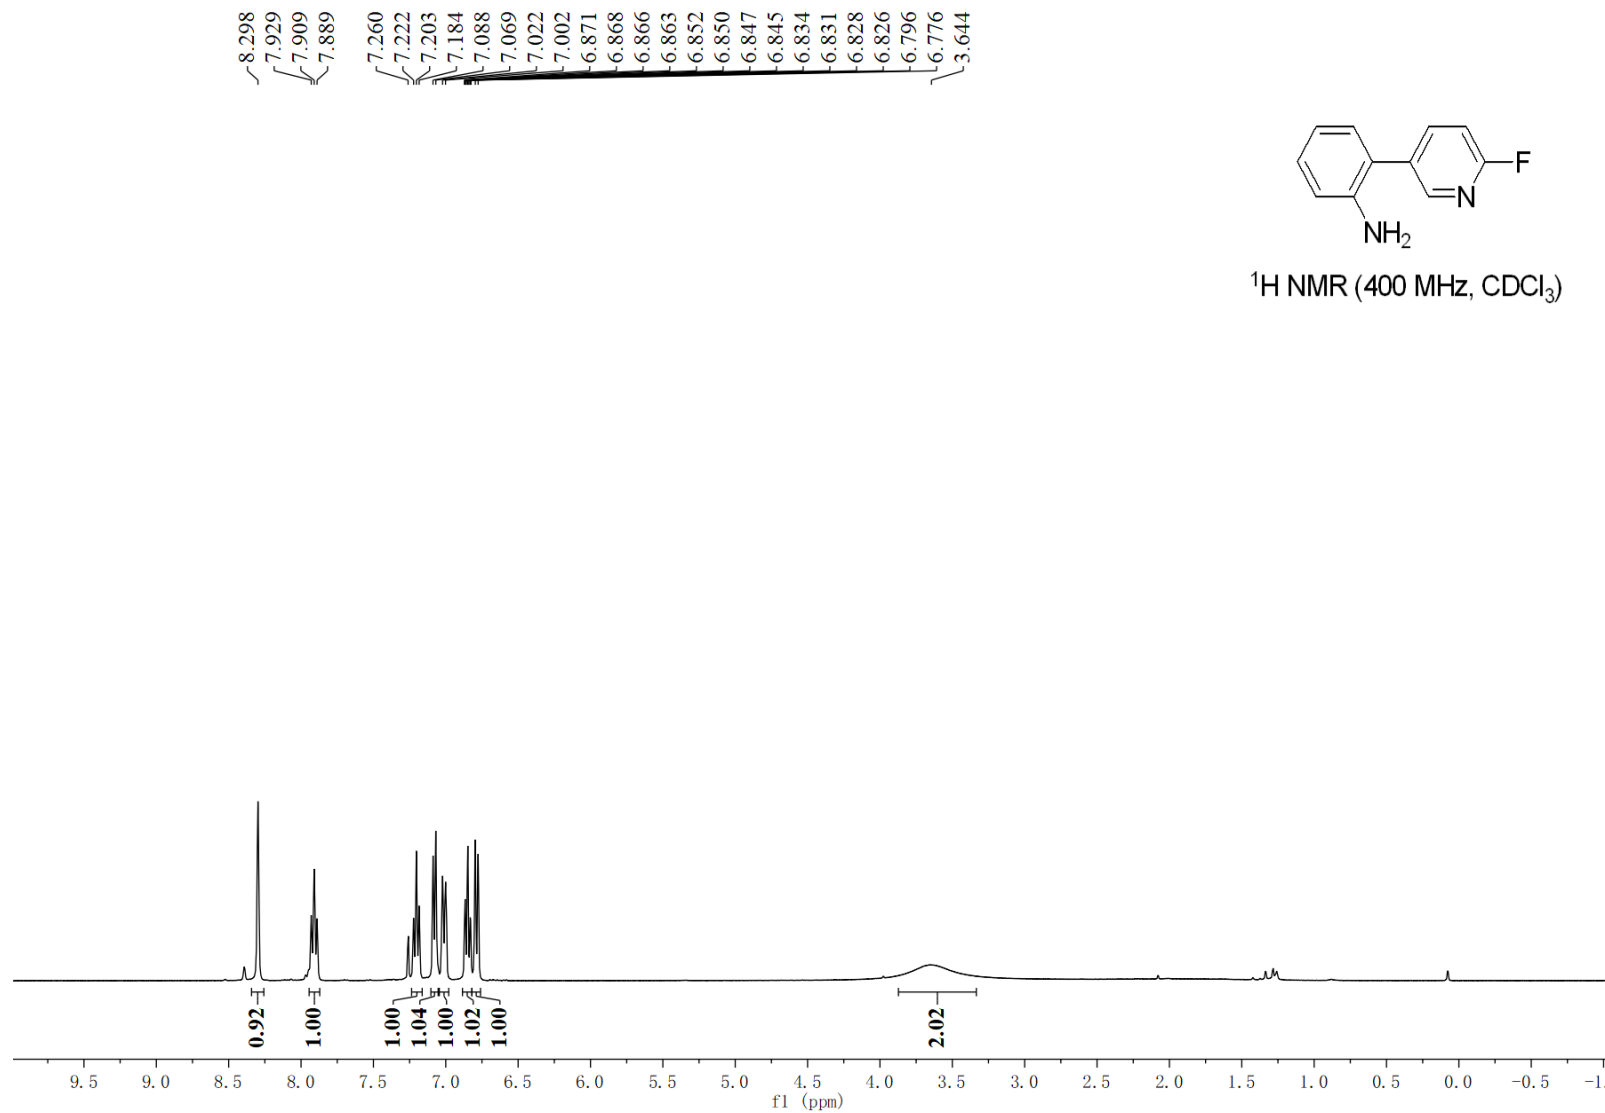

163.947  
161.565  
147.806  
147.662  
143.746  
141.937  
141.858  
133.102  
133.055  
130.541  
129.514  
122.530  
119.003  
115.953  
109.686  
109.315

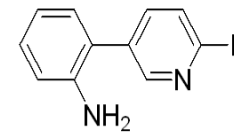

<sup>13</sup>C NMR (100 MHz, CDCl<sub>3</sub>)

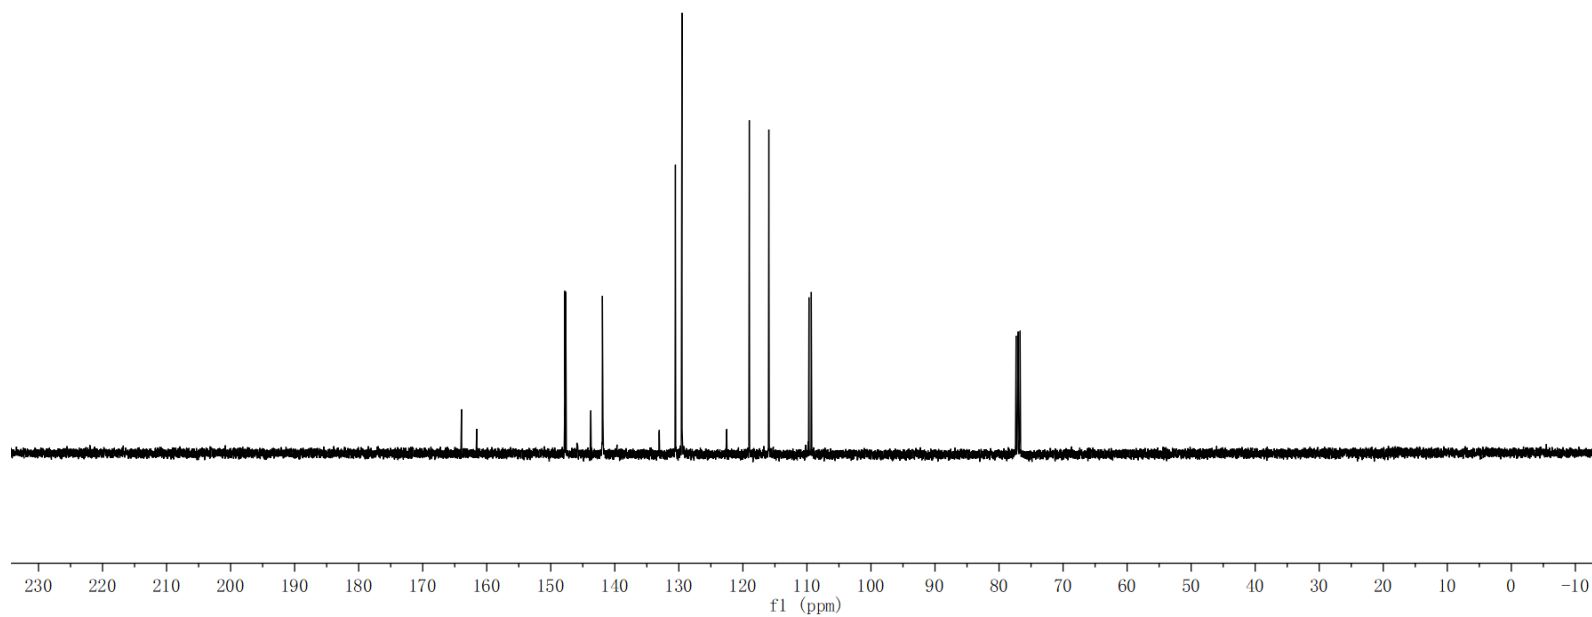

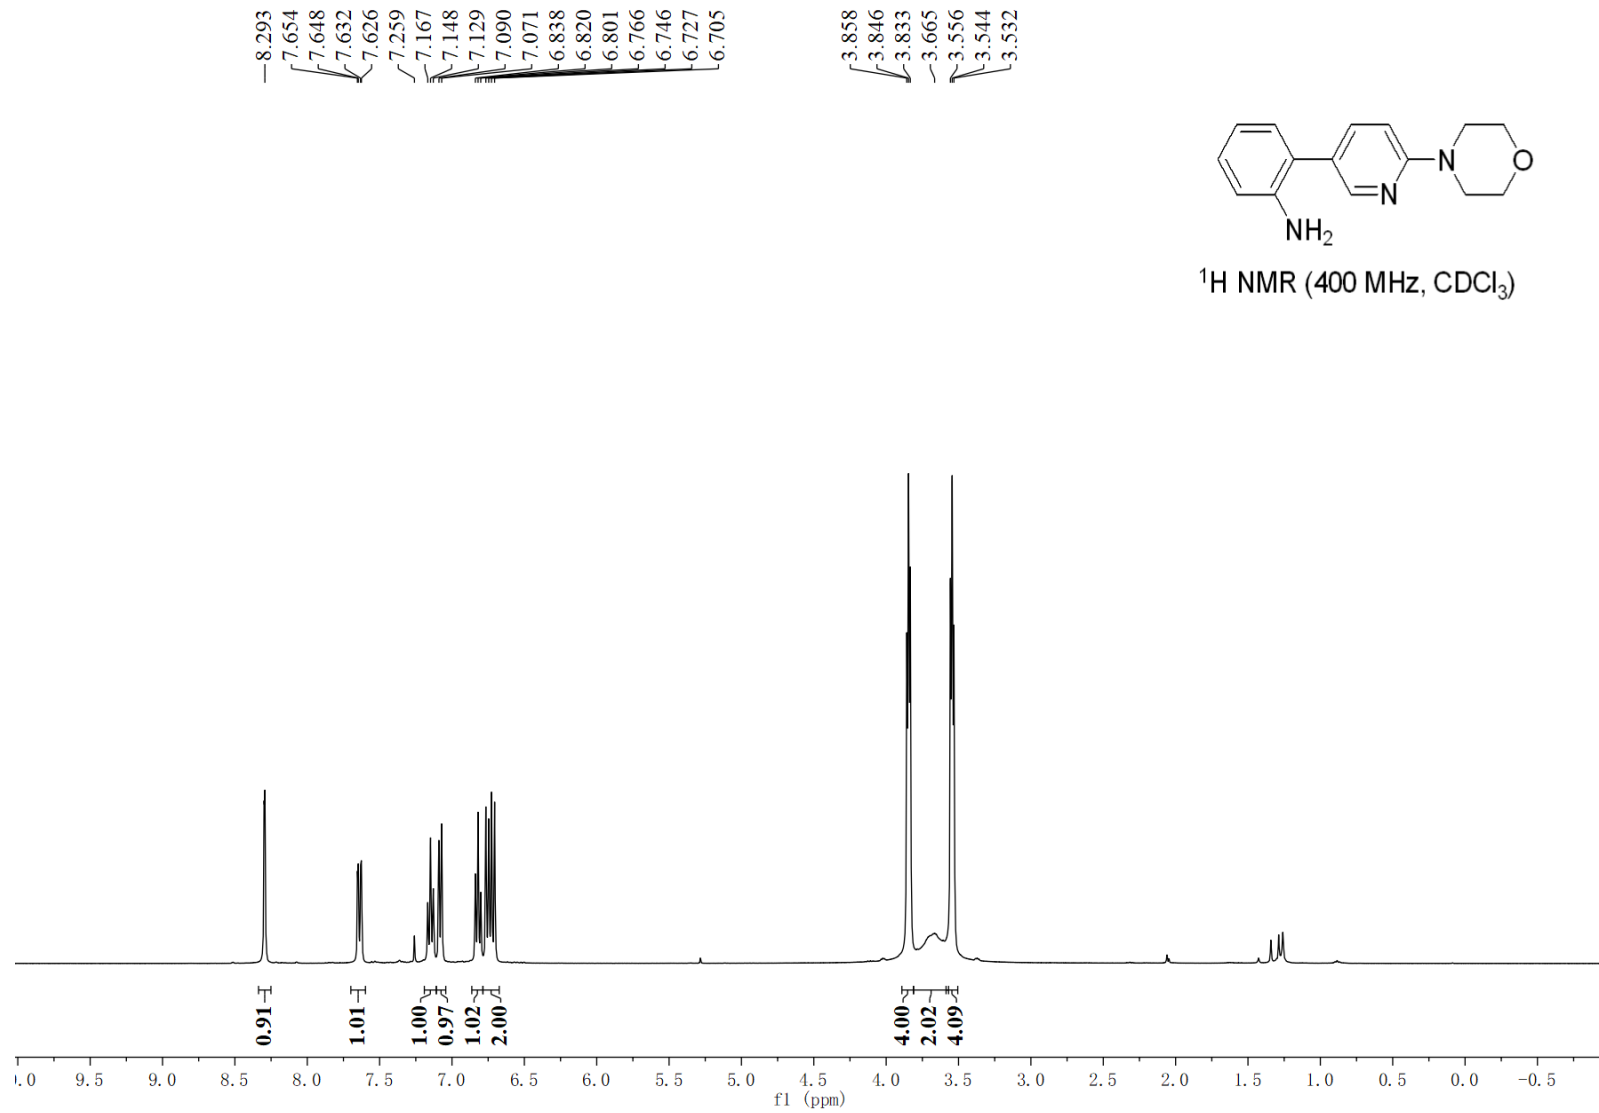

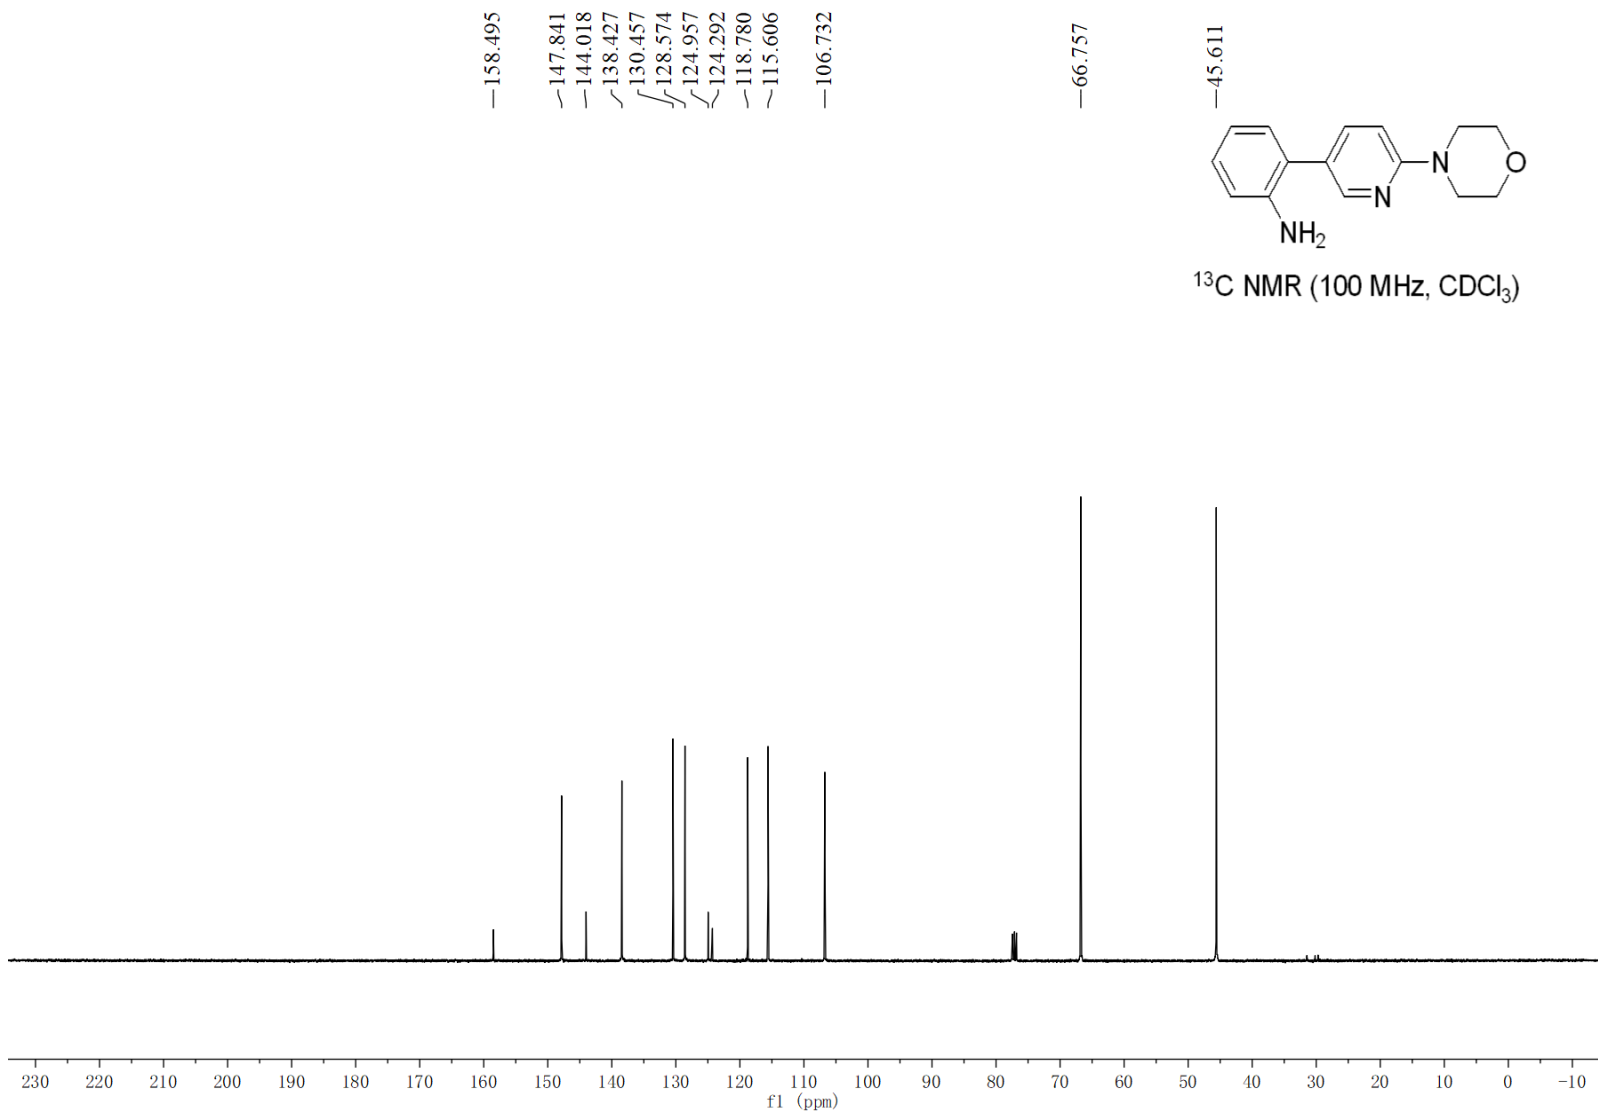

8.282  
8.276  
7.630  
7.624  
7.609  
7.602  
7.260  
7.163  
7.144  
7.125  
7.089  
7.070  
6.834  
6.816  
6.797  
6.769  
6.744  
6.722

3.703  
3.673  
3.660  
3.647

2.627  
2.615  
2.602  
2.408

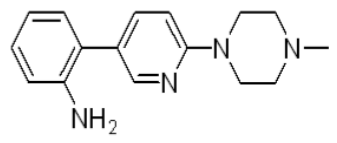

<sup>1</sup>H NMR (400 MHz, CDCl<sub>3</sub>)

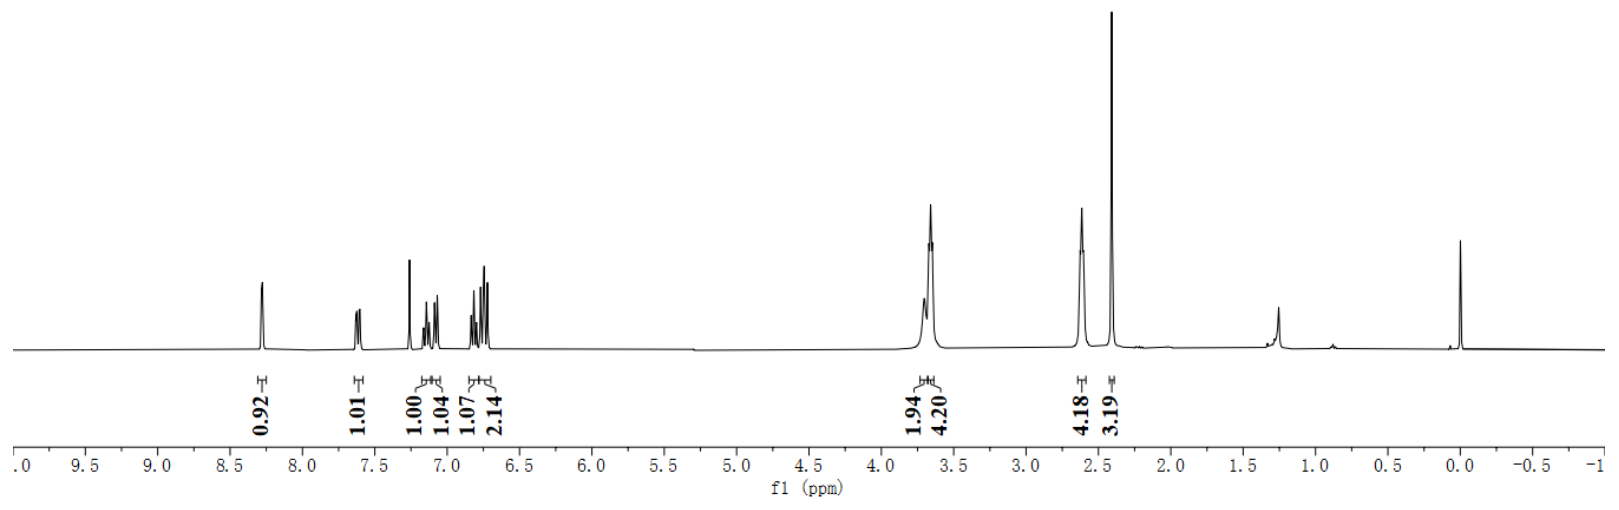

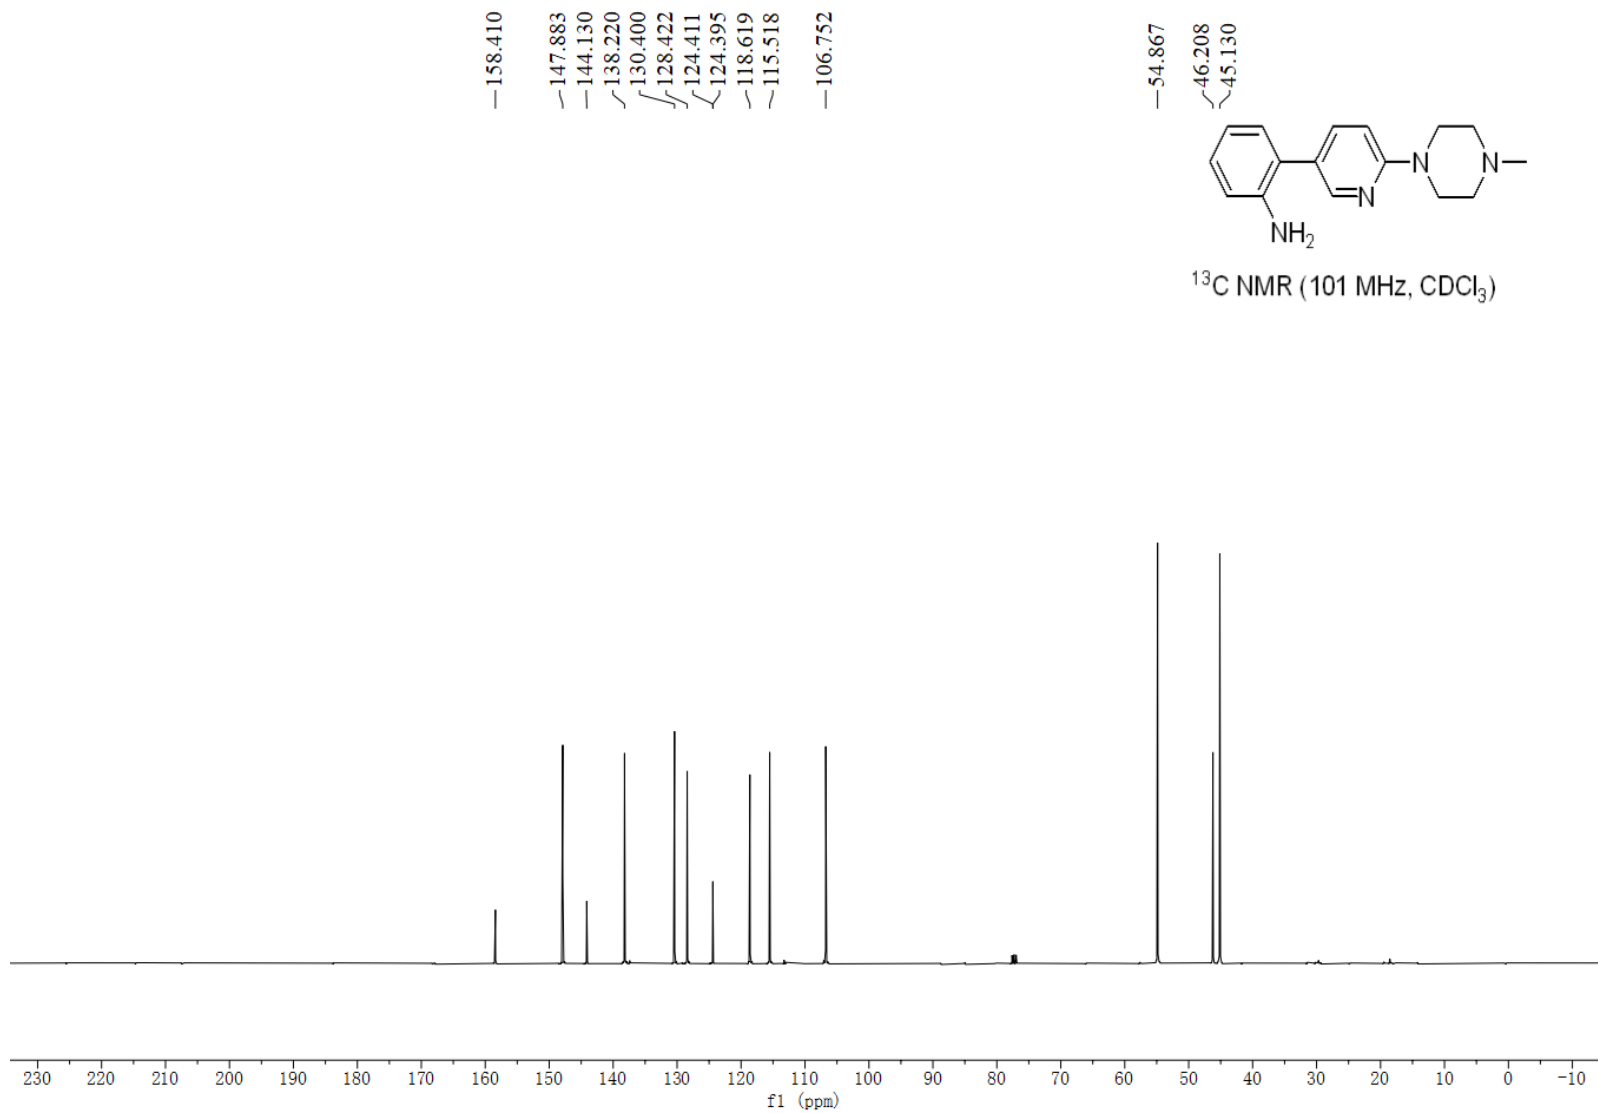

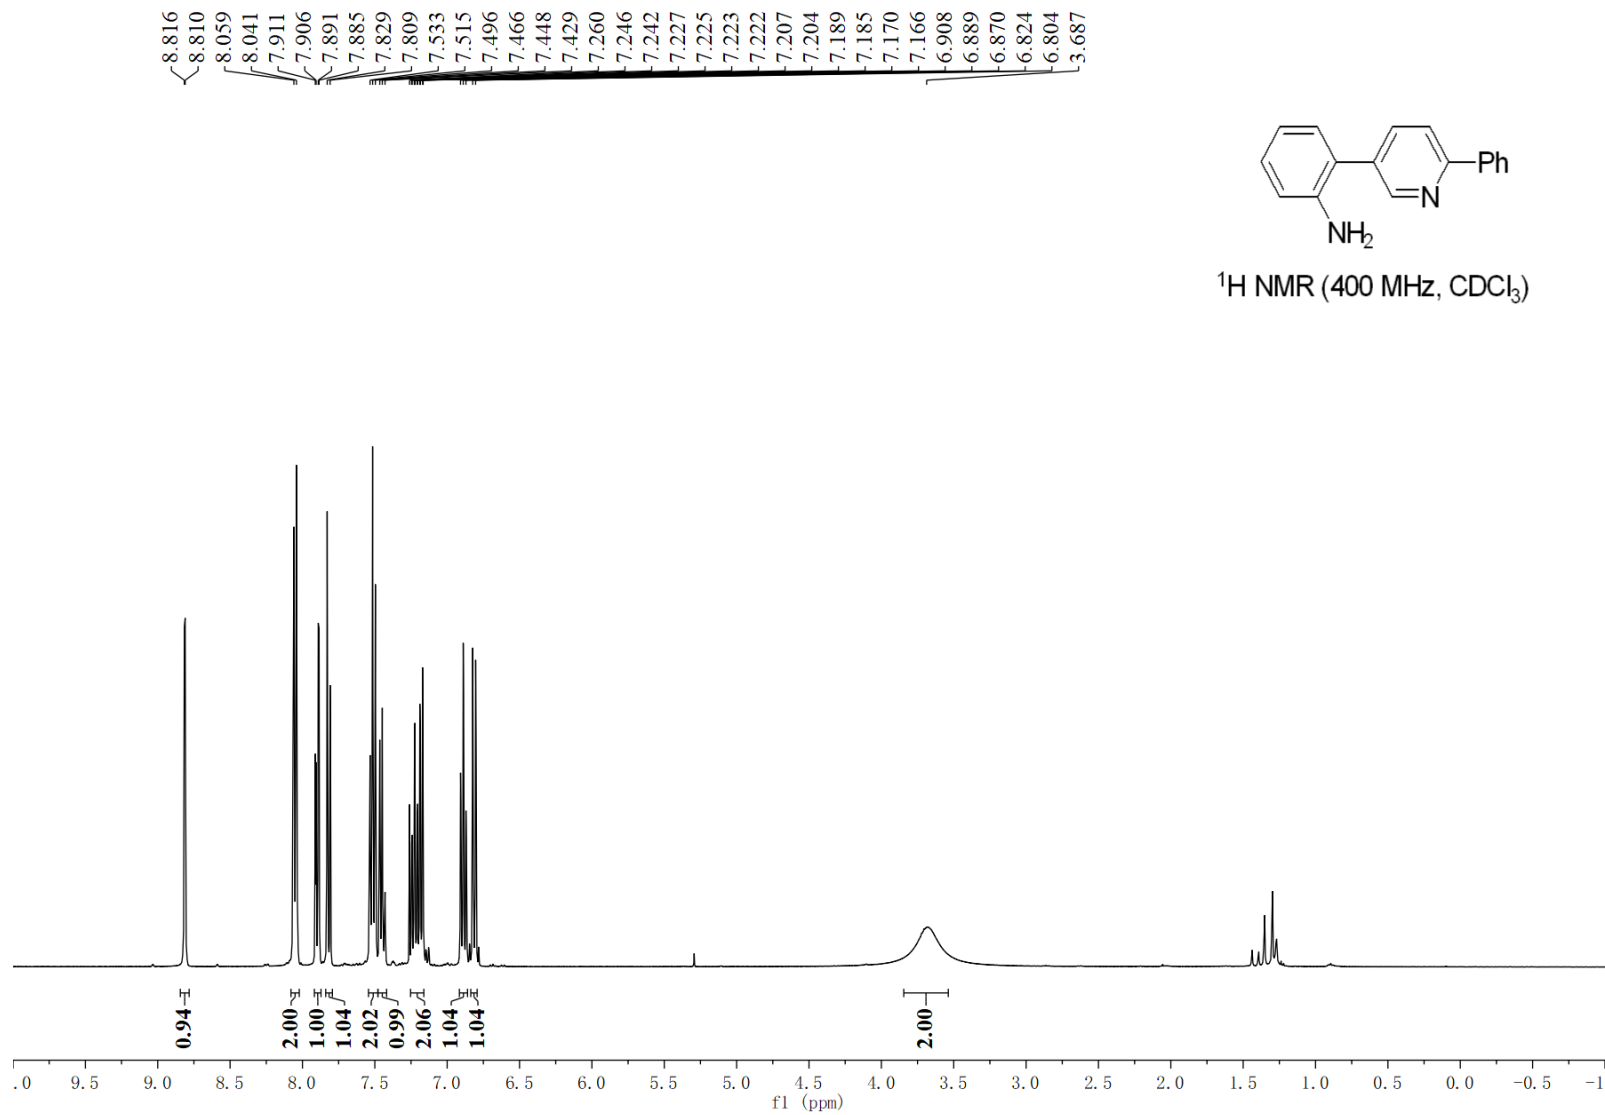



156.052  
149.816  
143.885  
138.942  
137.343  
133.572  
131.052  
130.541  
129.343  
129.090  
128.853  
126.851  
123.576  
120.382  
118.980  
118.790  
115.907

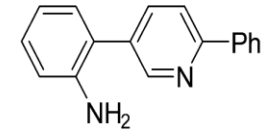

$^{13}\text{C}$  NMR (100 MHz,  $\text{CDCl}_3$ )

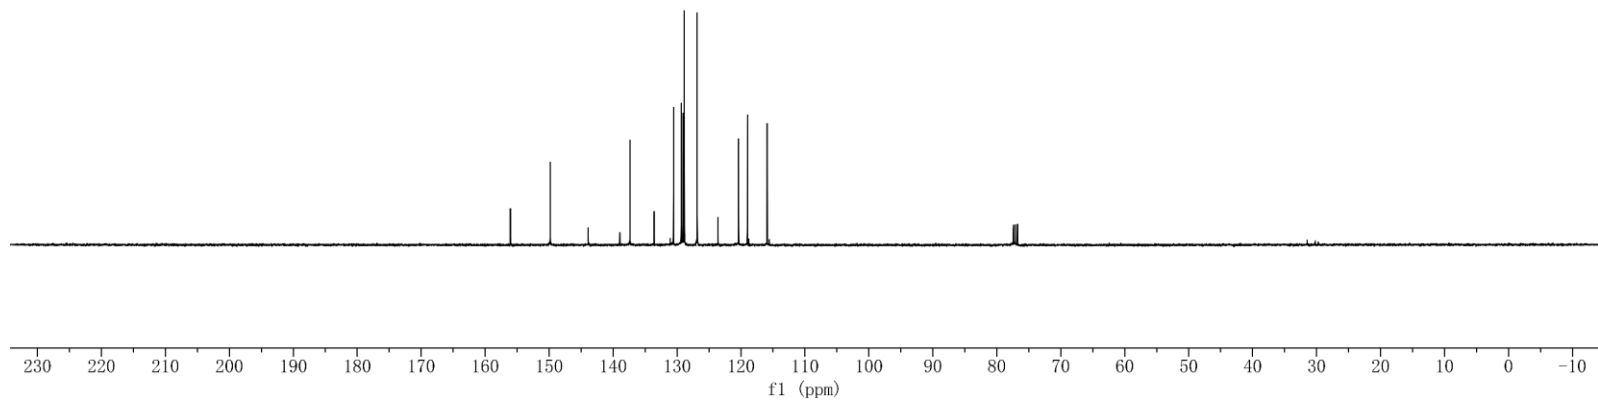

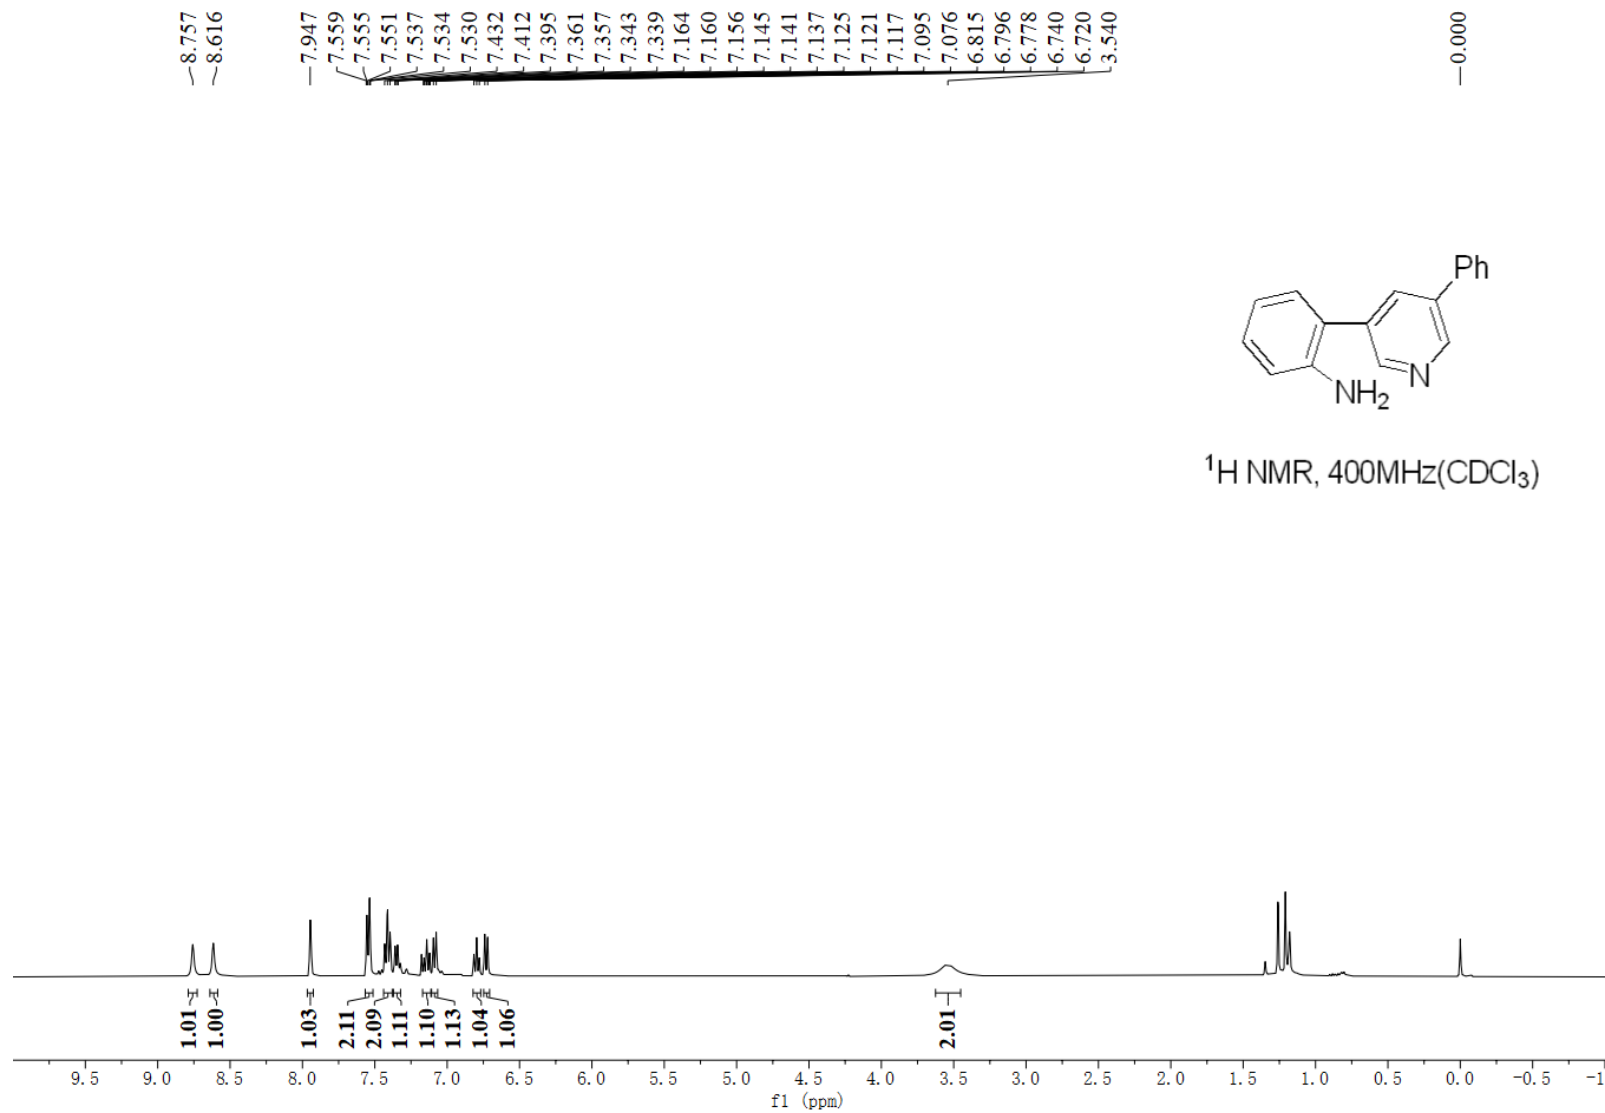

148.448  
146.724  
143.796  
137.417  
136.625  
135.276  
135.041  
130.579  
129.477  
129.141  
128.292  
127.181  
124.439  
123.952  
123.501  
118.990  
115.934

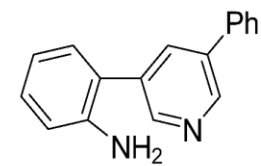

<sup>13</sup>C NMR, 101MHz(CDCl<sub>3</sub>)

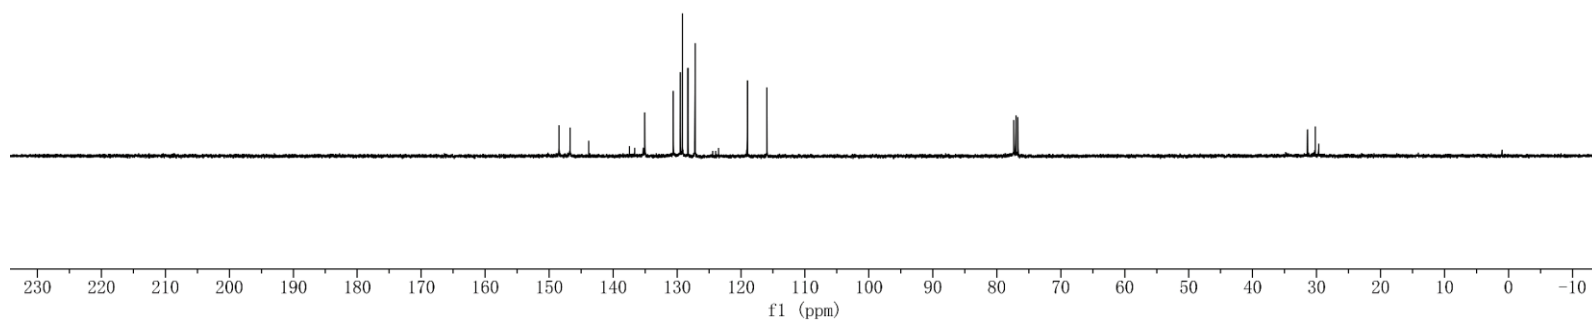

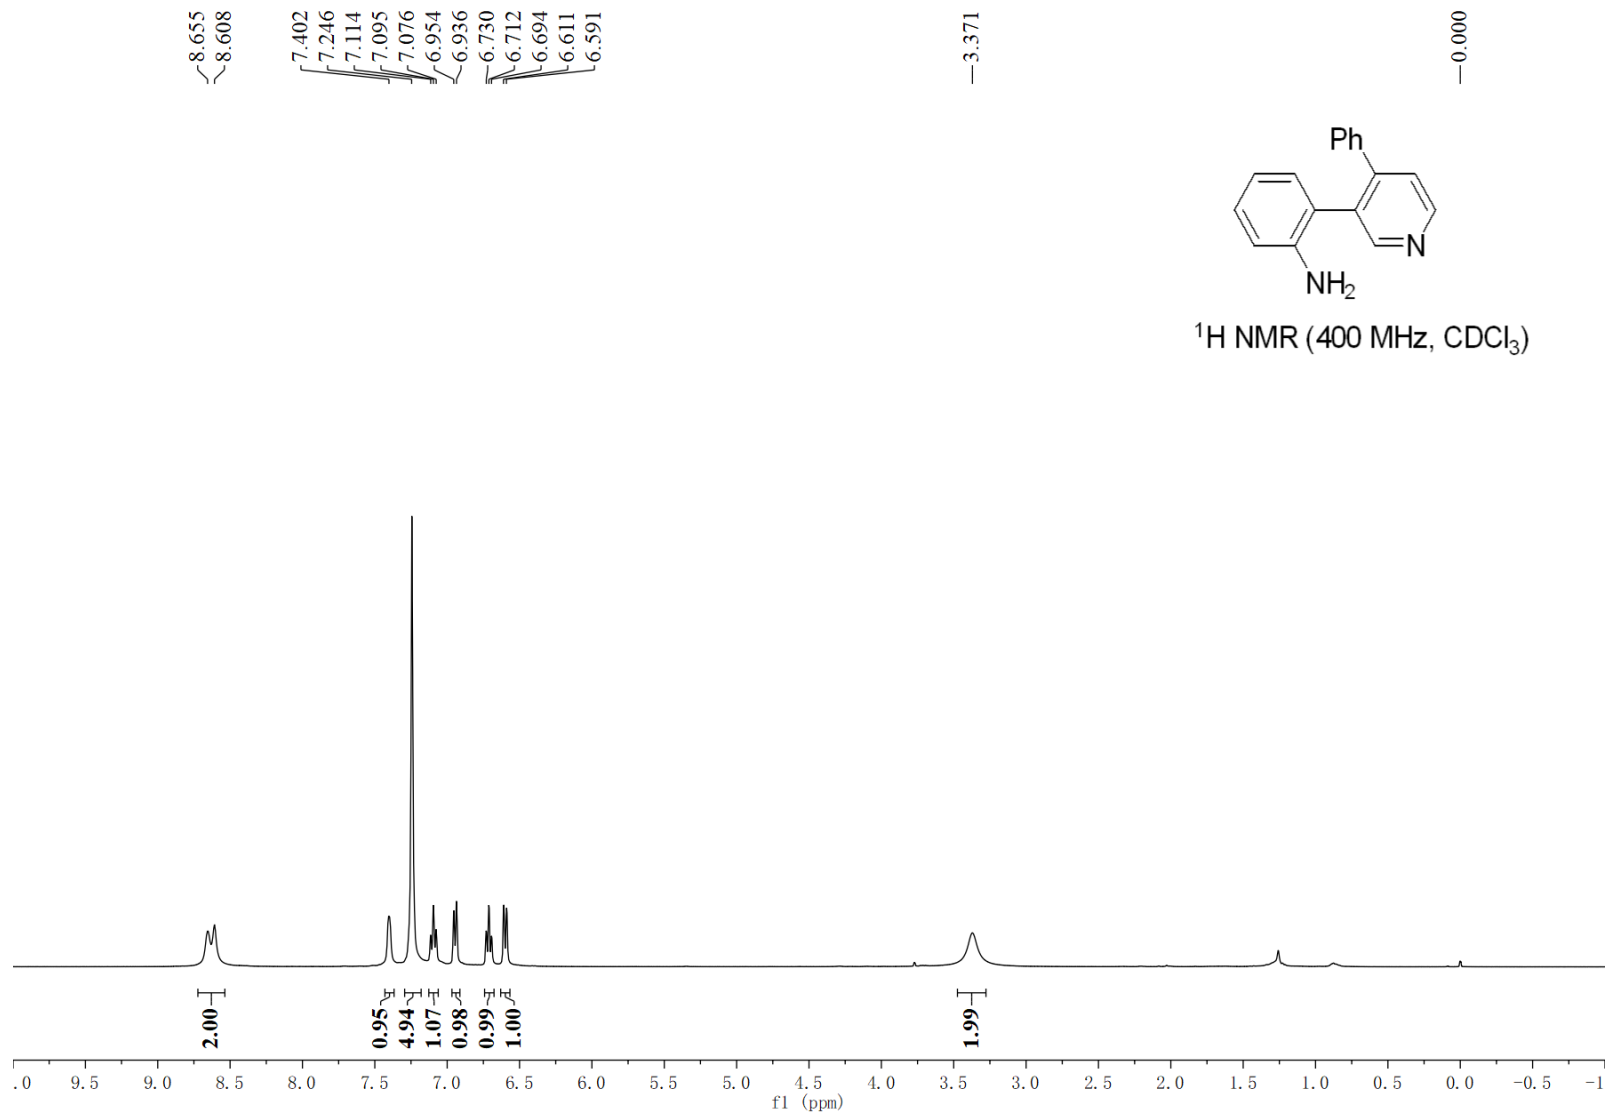

151.818  
149.140  
148.574  
143.932  
138.231  
133.213  
131.266  
129.086  
128.539  
128.429  
128.321  
128.258  
124.456  
123.107  
118.512  
115.543

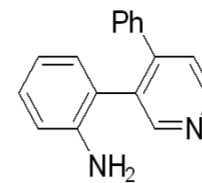

$^{13}\text{C}$  NMR (100 MHz,  $\text{CDCl}_3$ )

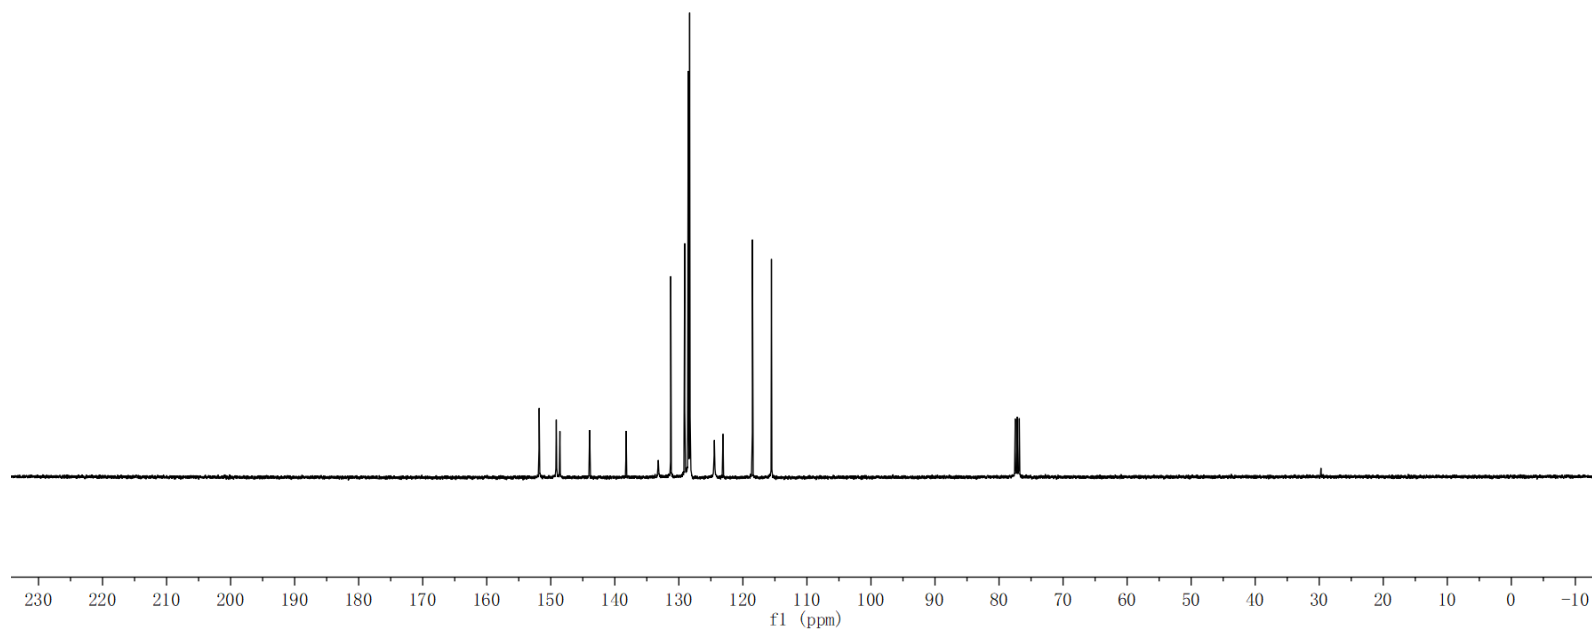

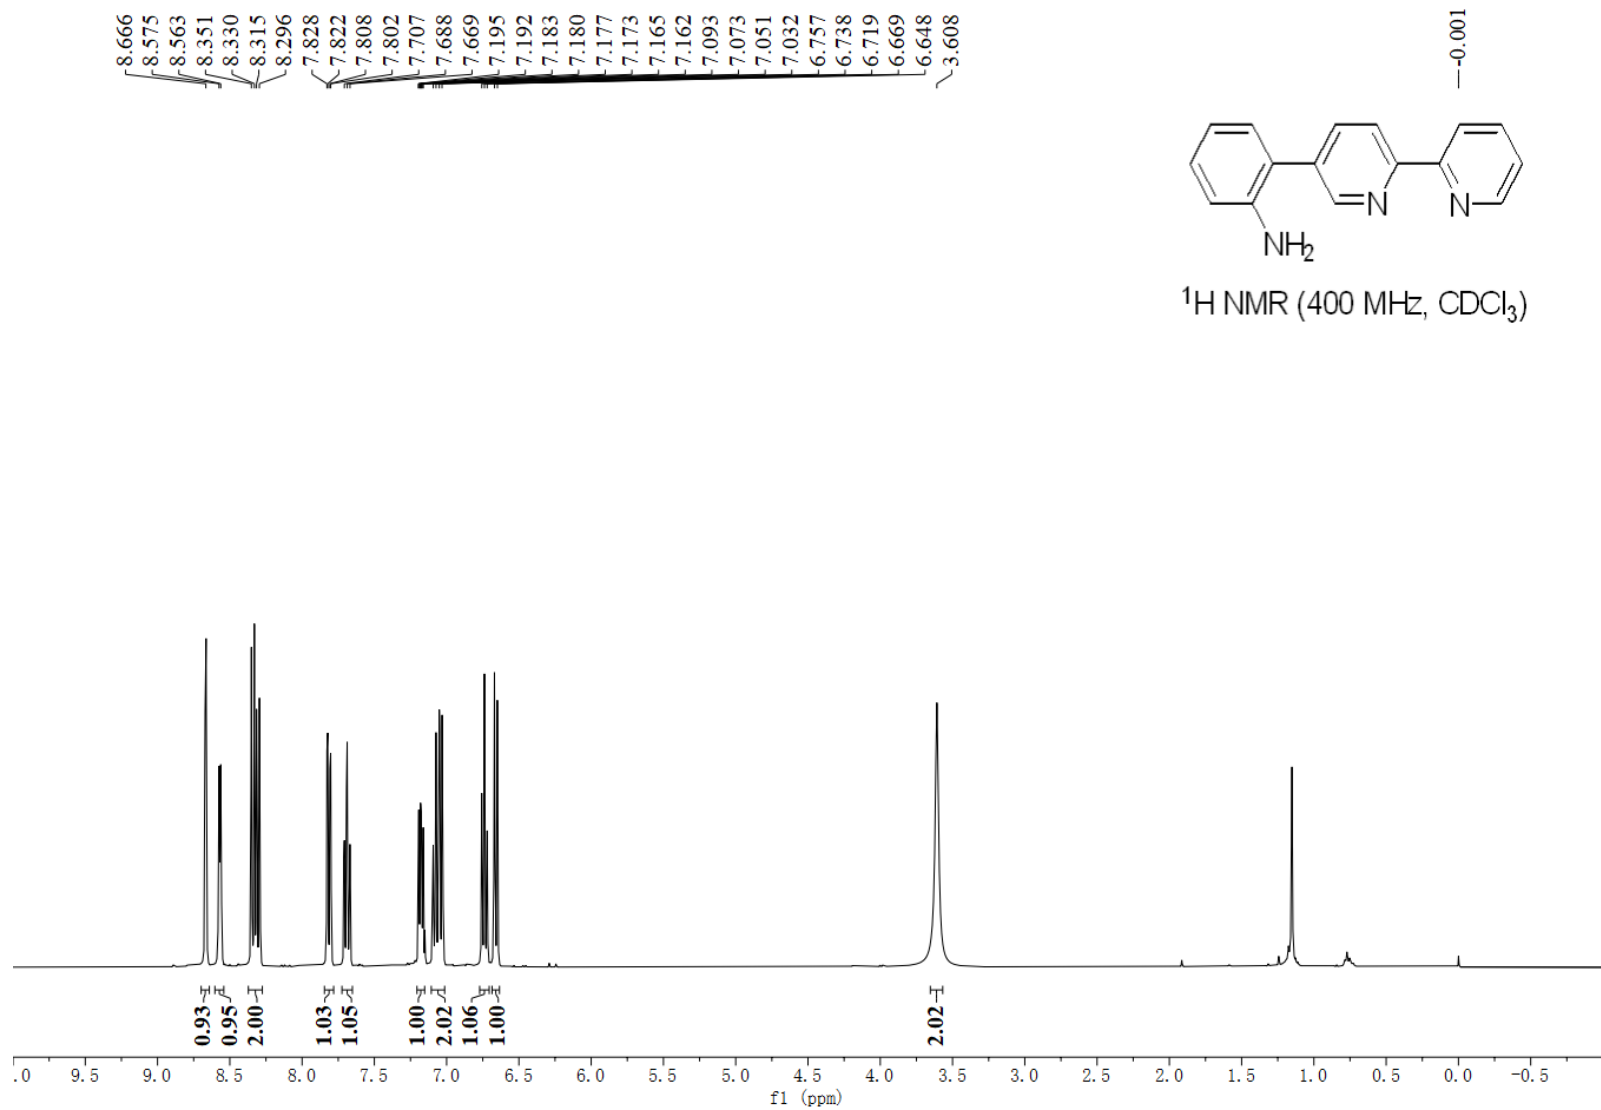

155.799  
154.733  
149.376  
149.209  
143.939  
137.363  
136.950  
135.276  
130.485  
129.399  
123.731  
123.724  
123.482  
121.035  
120.936  
118.883  
115.913

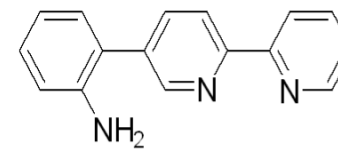

$^{13}\text{C}$  NMR (100 MHz,  $\text{CDCl}_3$ )

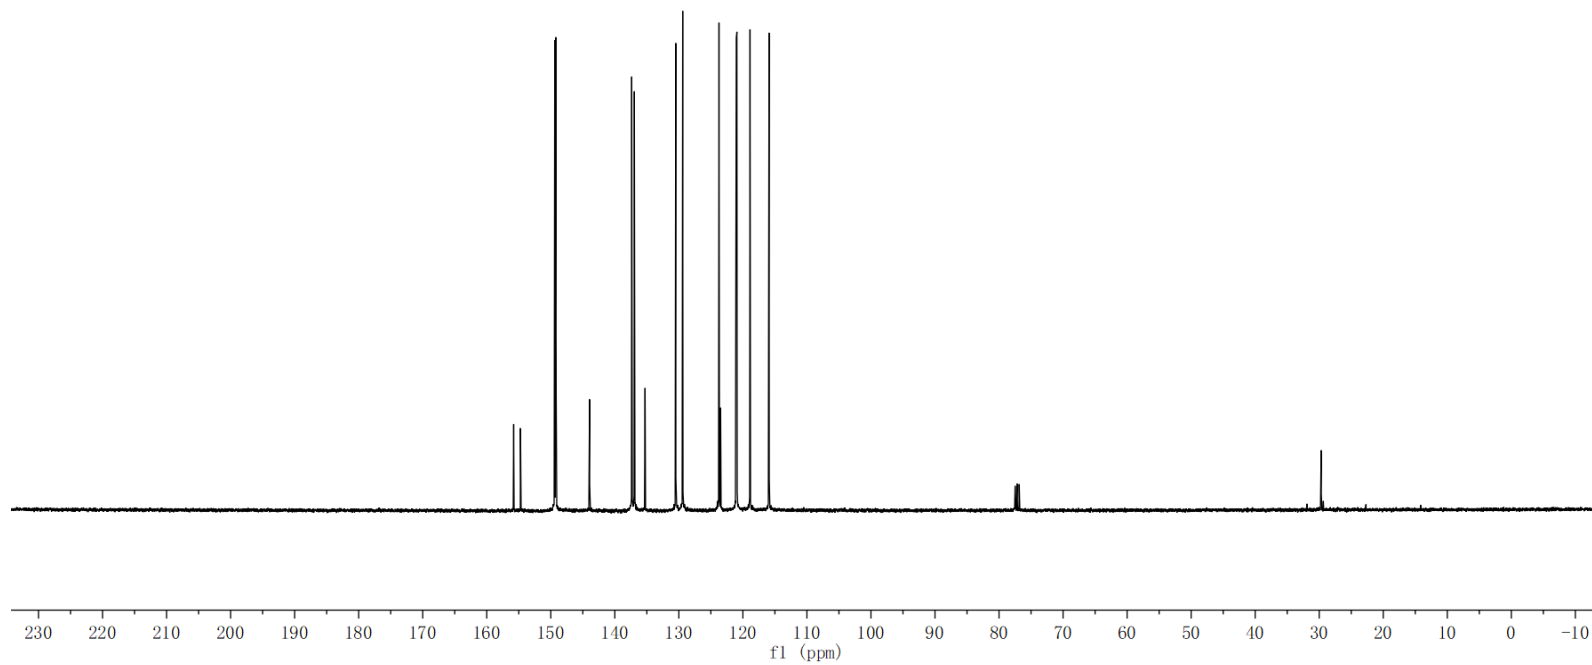

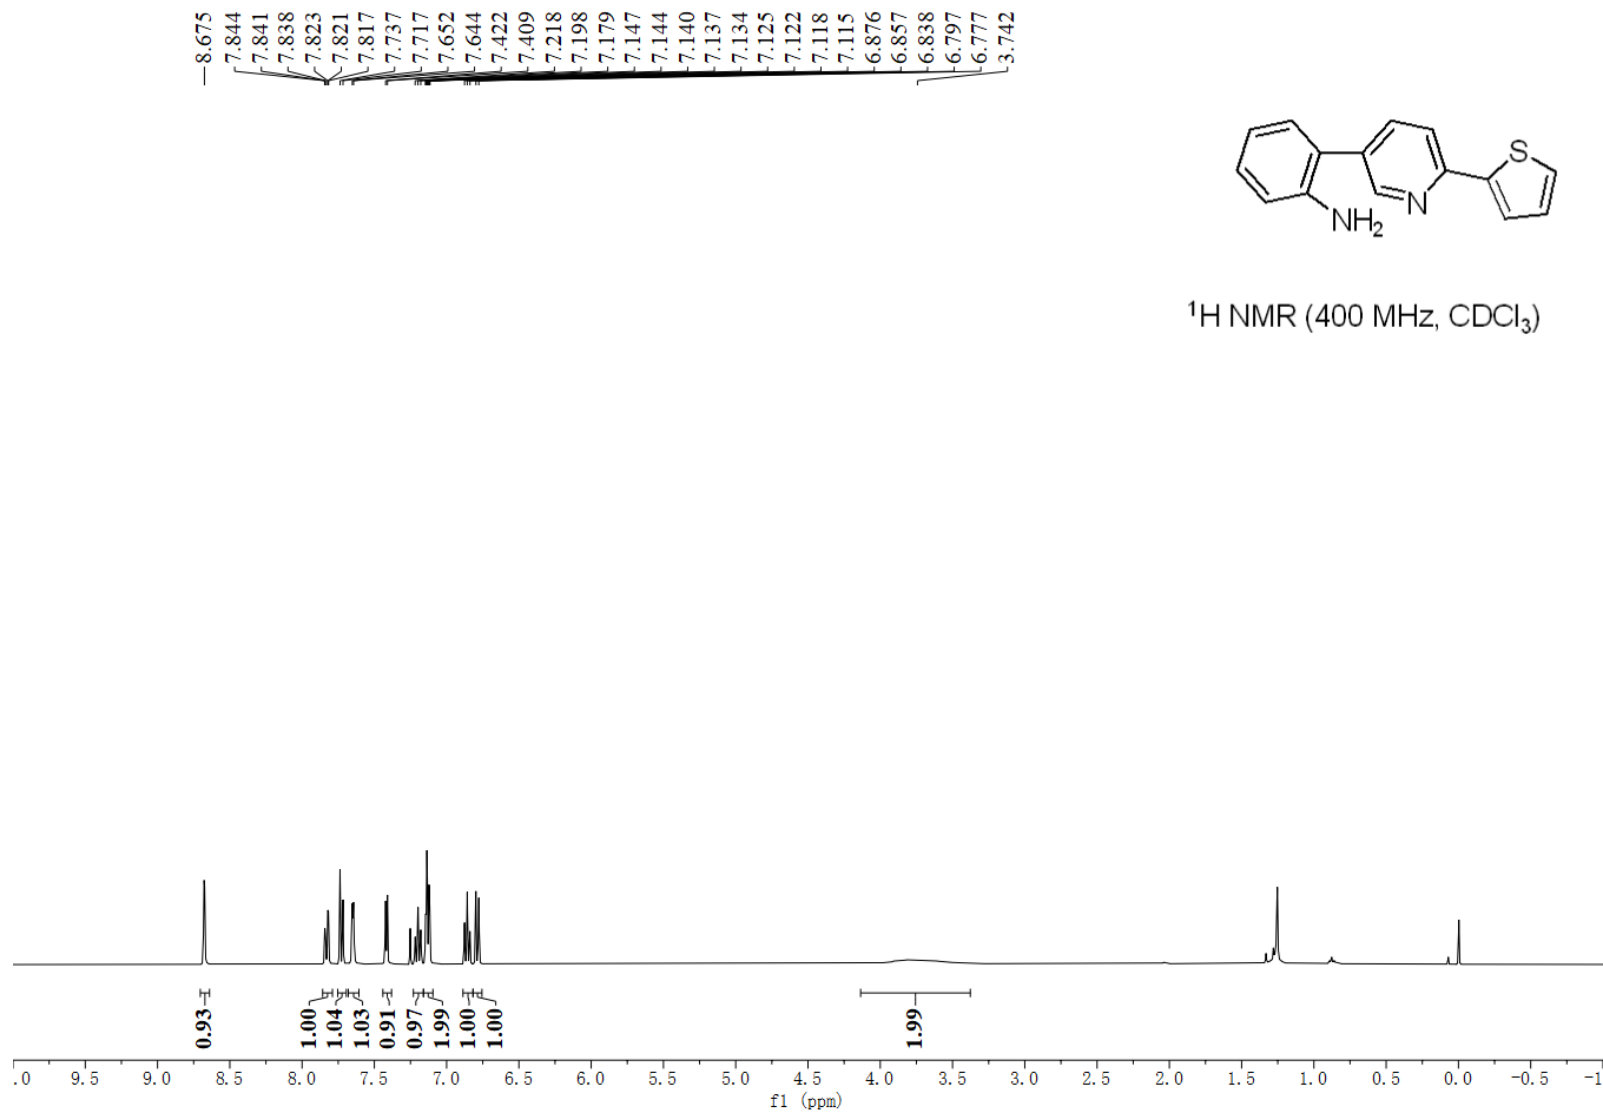



151.295  
149.655  
143.857  
137.229  
133.405  
131.034  
130.439  
129.338  
128.146  
127.686  
124.671  
123.526  
118.980  
118.654  
115.917

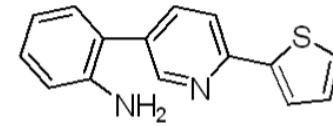

$^{13}\text{C}$  NMR (101 MHz,  $\text{CDCl}_3$ )

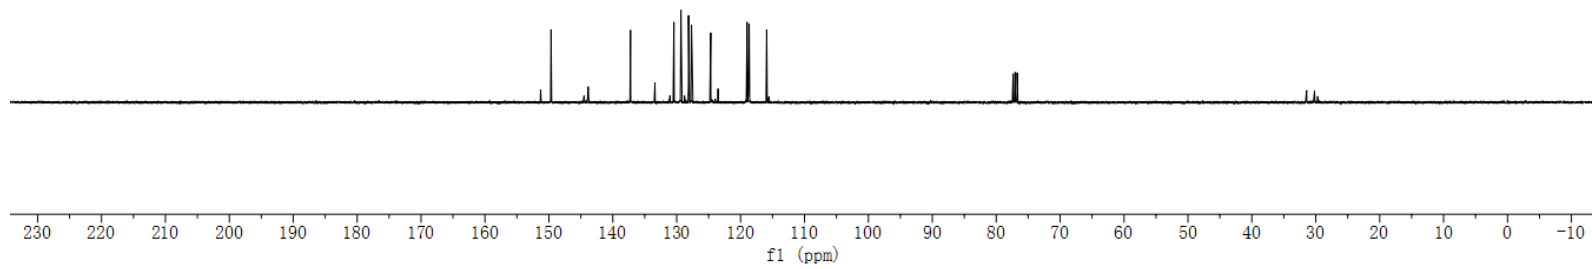

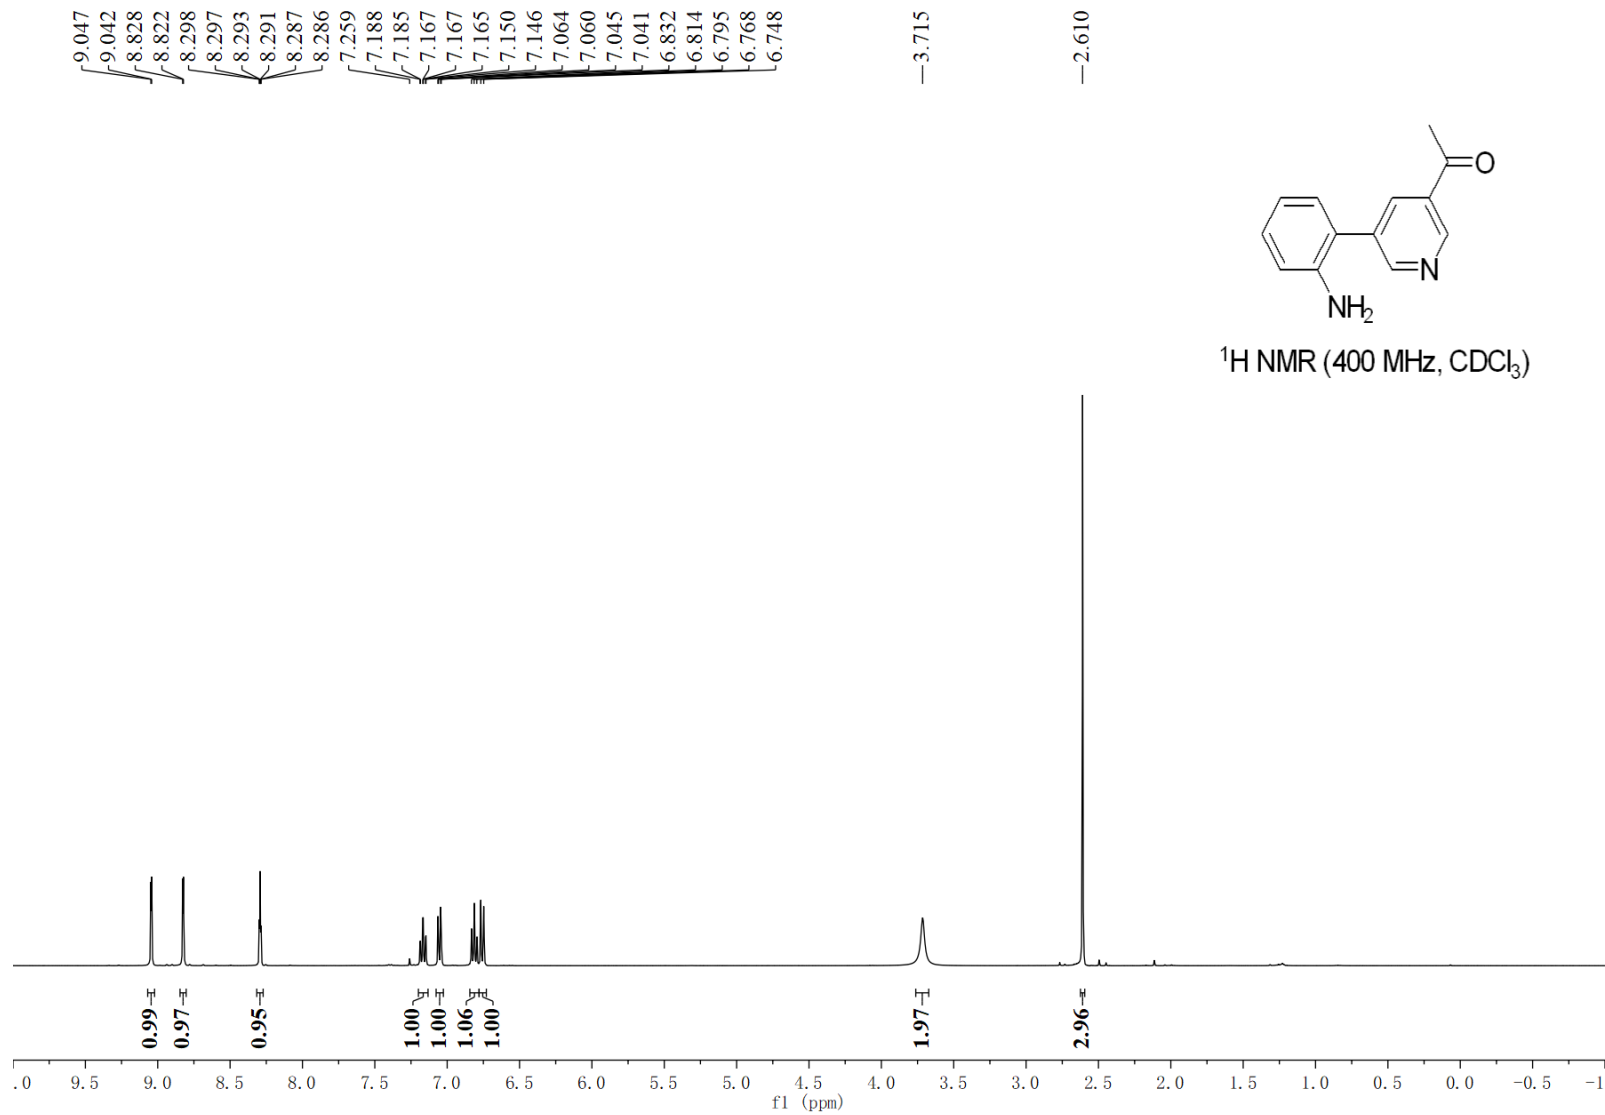

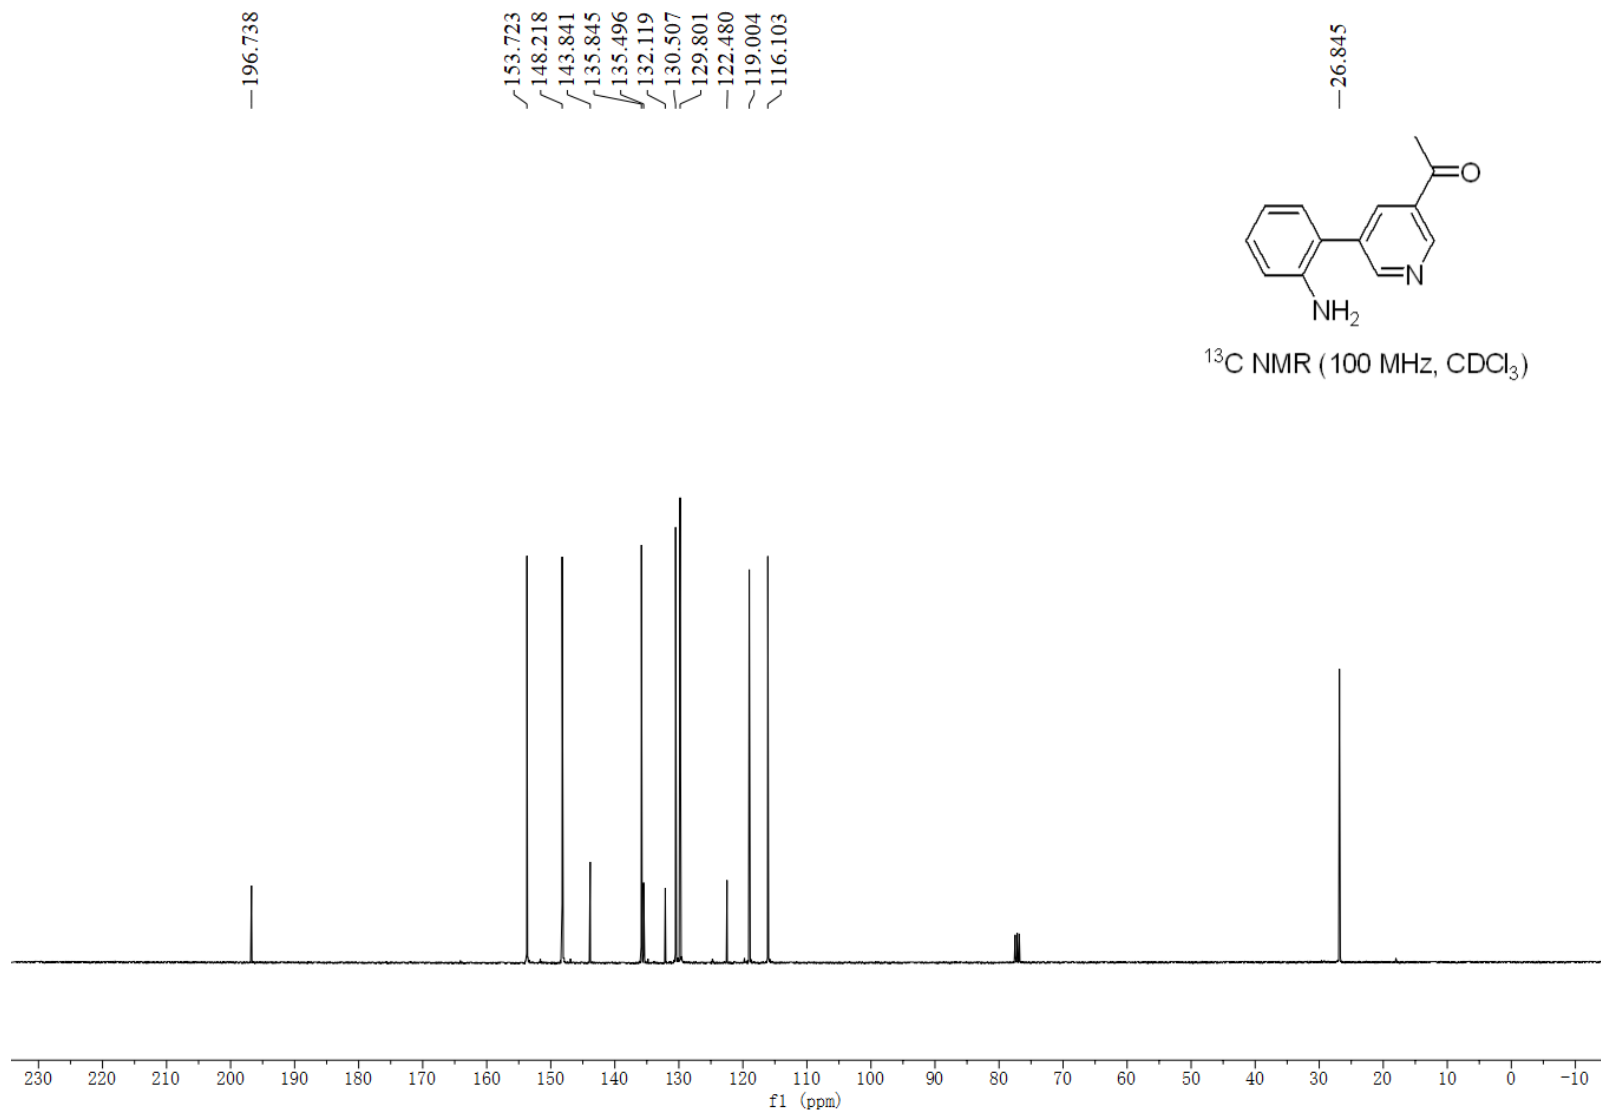

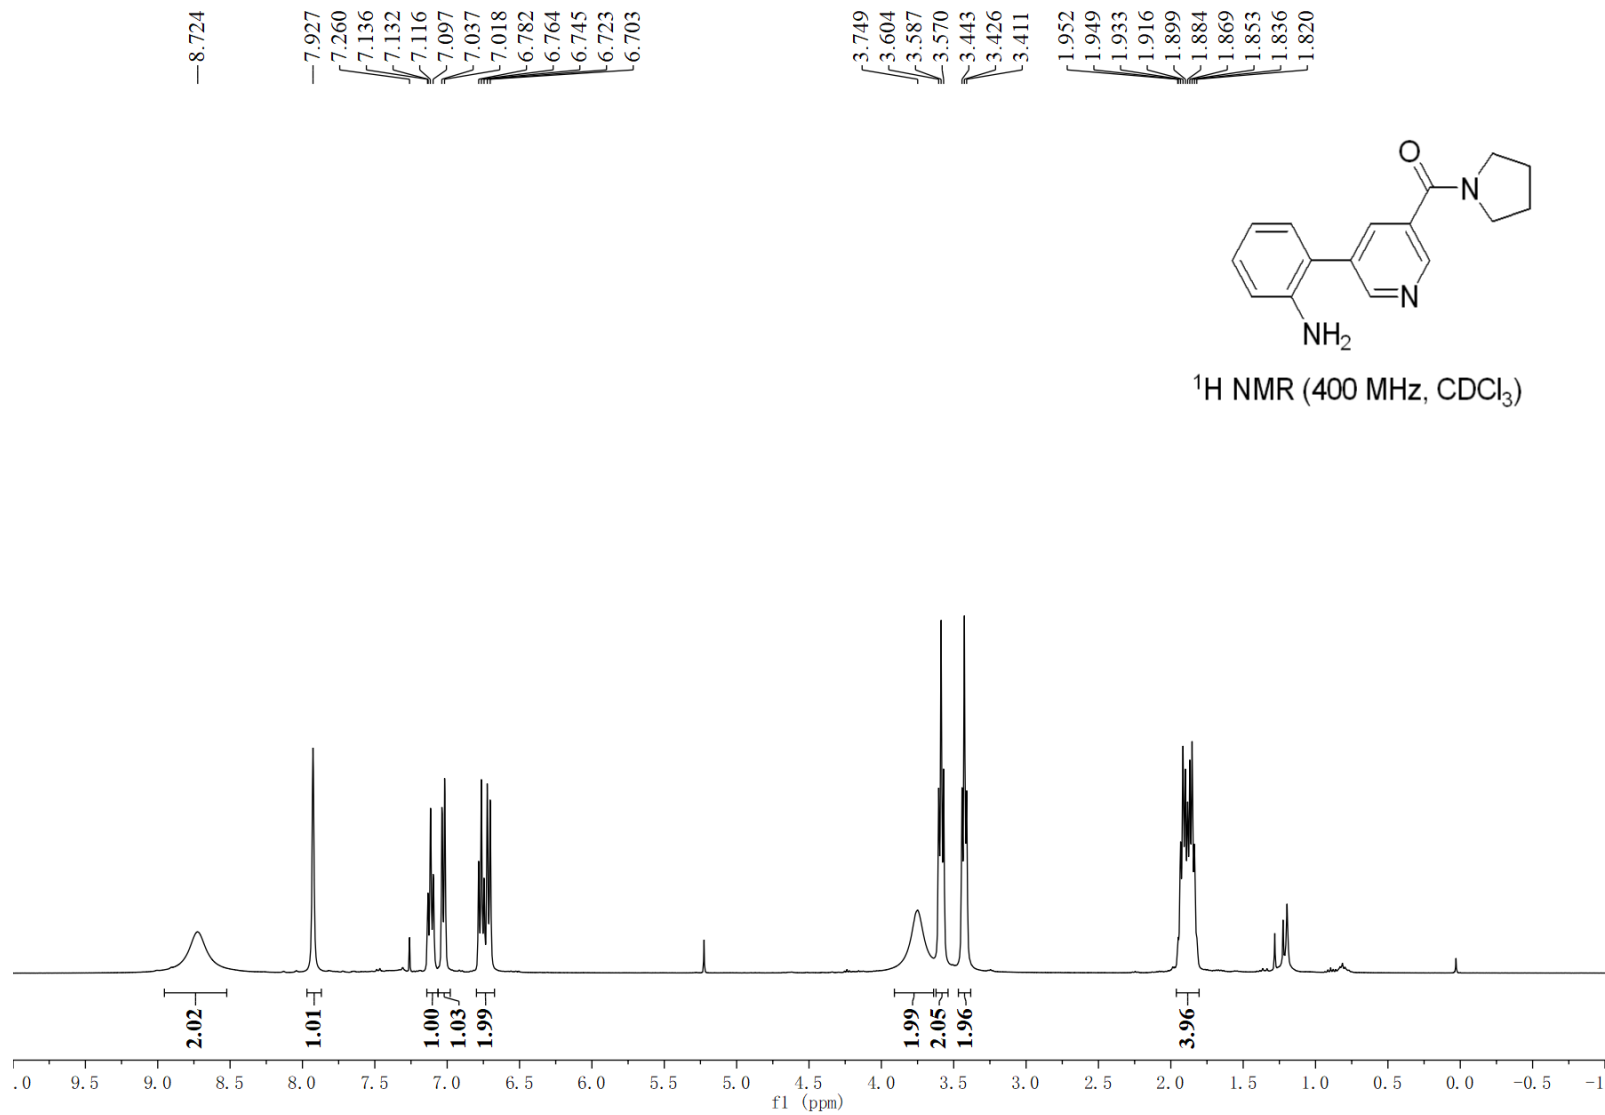

— 166.942  
~ 150.717  
~ 146.388  
~ 143.955  
/ 135.082  
/ 132.951  
~ 130.482  
~ 129.617  
~ 122.647  
~ 118.786  
~ 116.001

~ 49.542  
~ 46.404  
~ 26.396  
~ 24.348

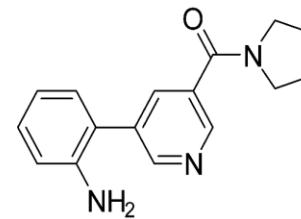

<sup>13</sup>C NMR (100 MHz, CDCl<sub>3</sub>)

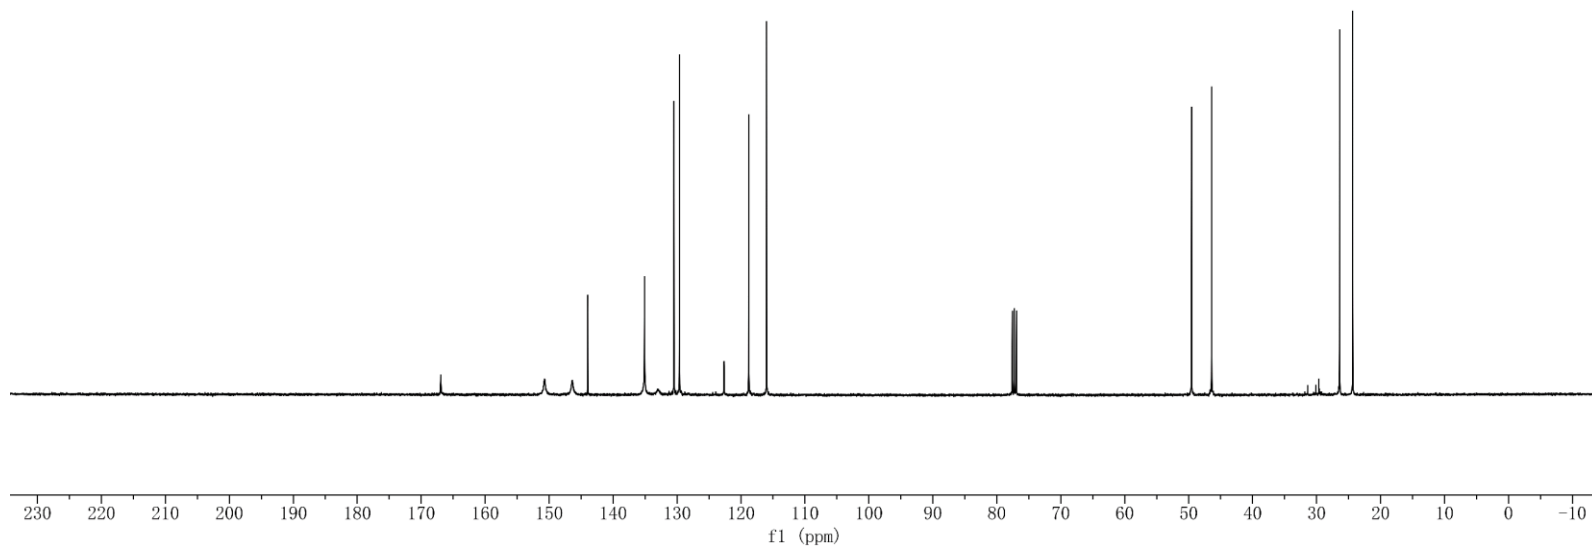

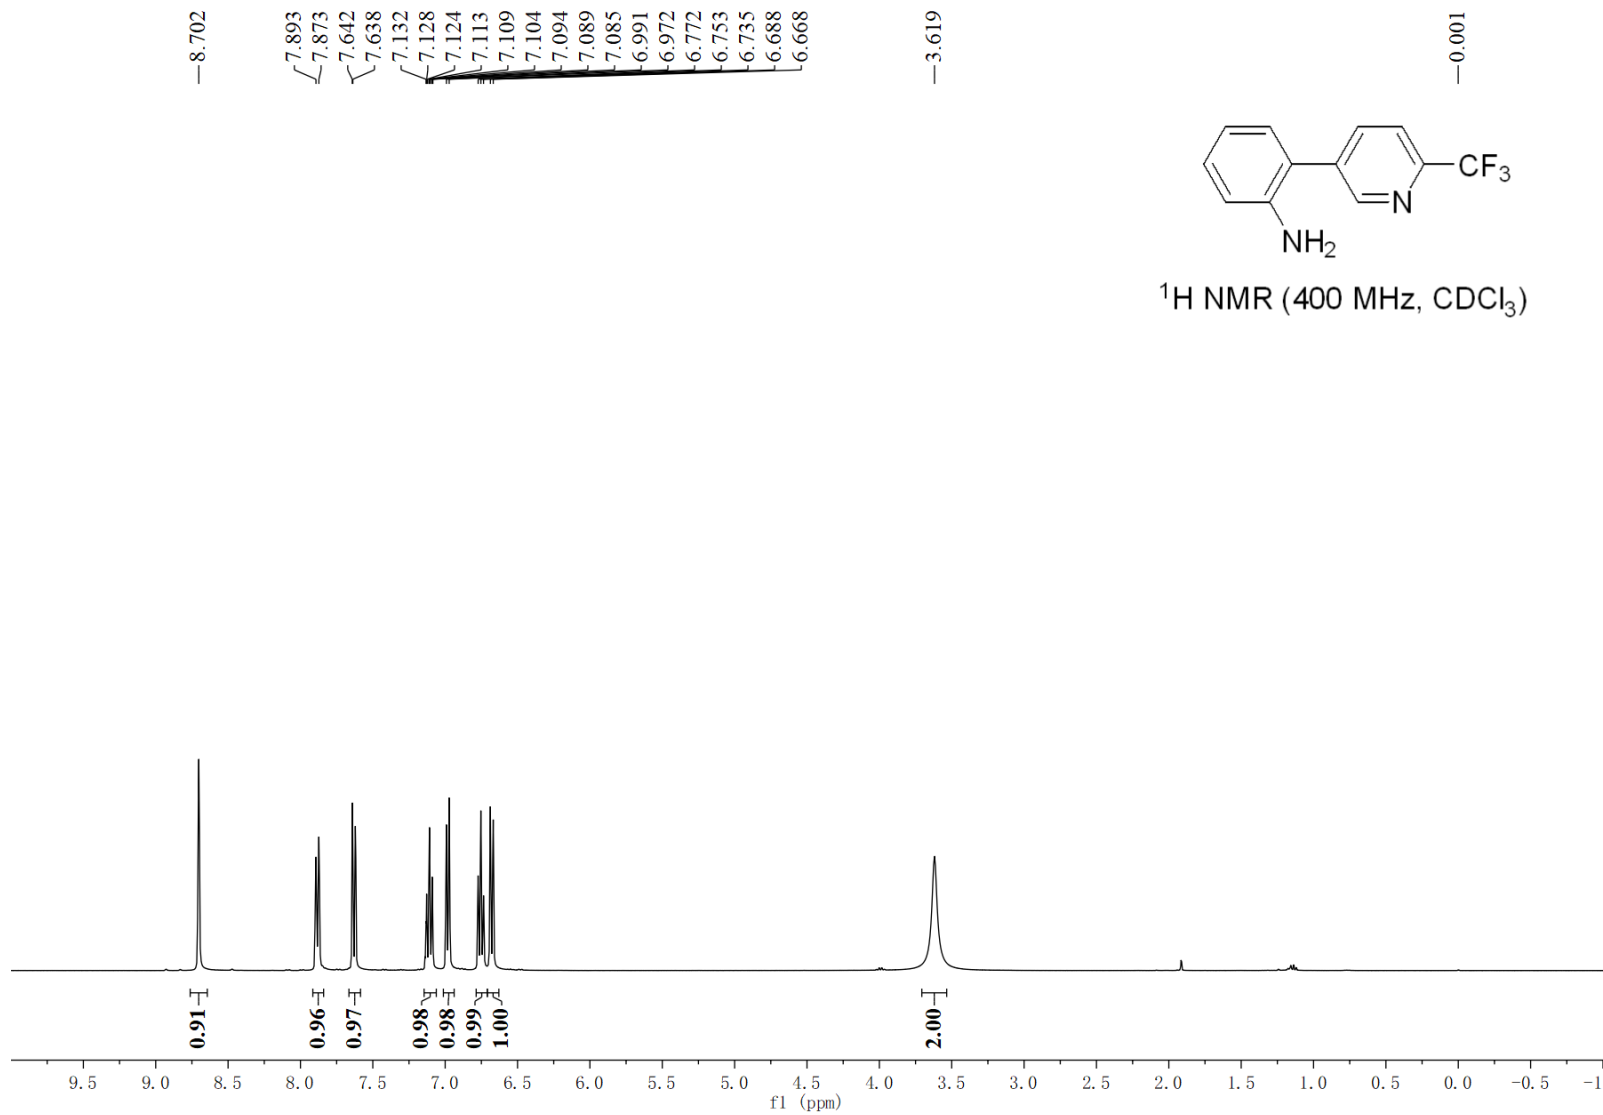

150.241  
147.091  
146.746  
146.399  
146.054  
143.769  
138.447  
137.761  
130.484  
130.090  
122.995  
122.157  
120.473  
120.446  
120.419  
120.391  
119.168  
116.246

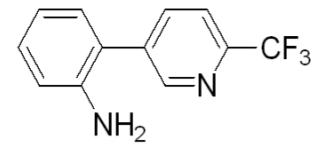

<sup>13</sup>C NMR (100 MHz, CDCl<sub>3</sub>)

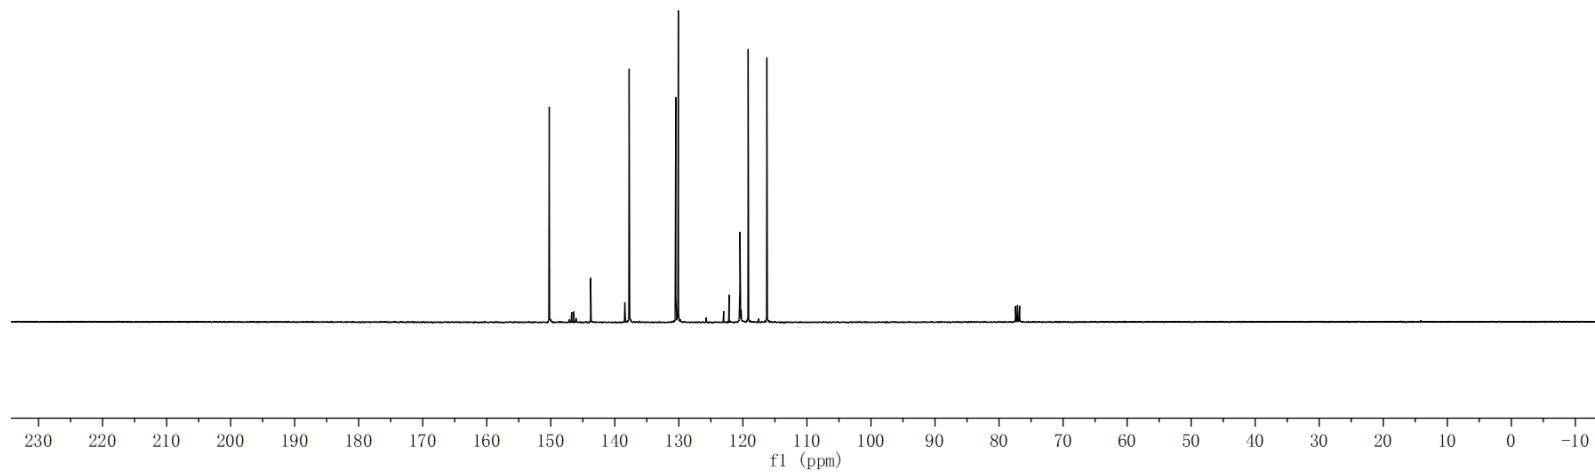

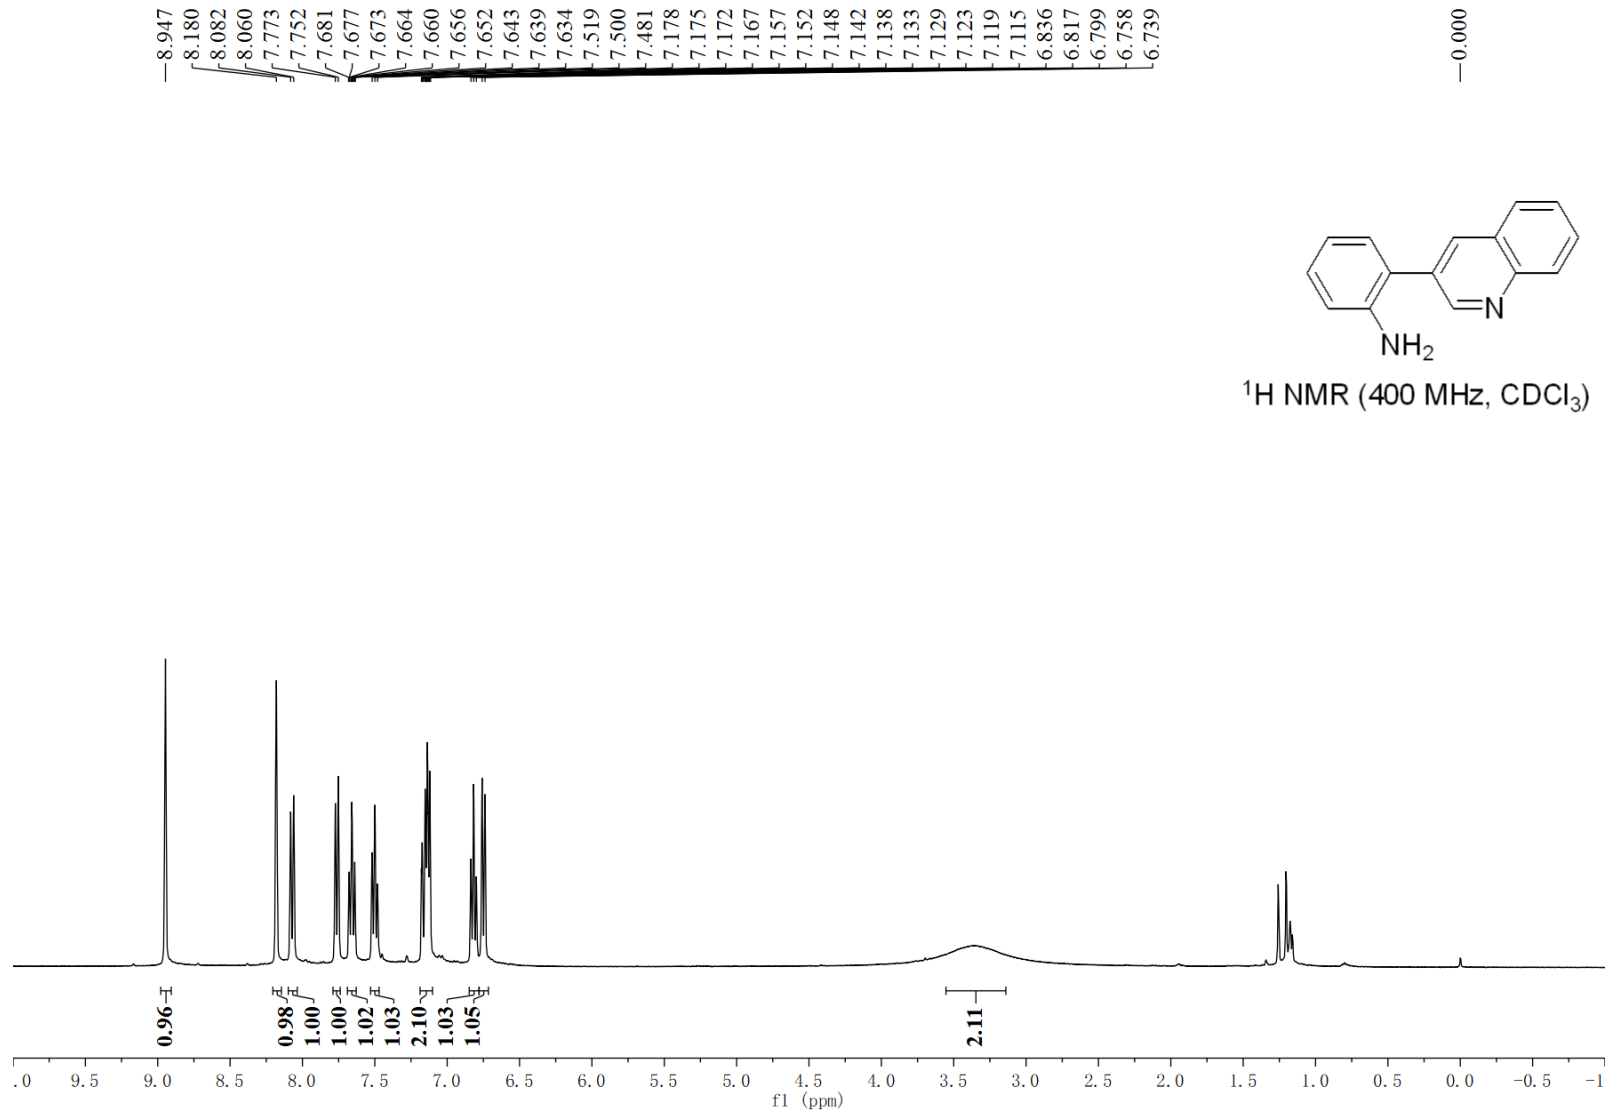



151.417  
147.017  
143.978  
135.530  
132.454  
130.821  
129.560  
129.429  
129.160  
127.931  
127.811  
127.028  
123.686  
119.074  
115.968

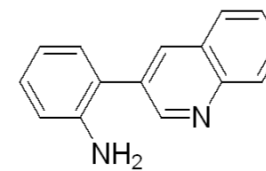

<sup>13</sup>C NMR (100 MHz, CDCl<sub>3</sub>)

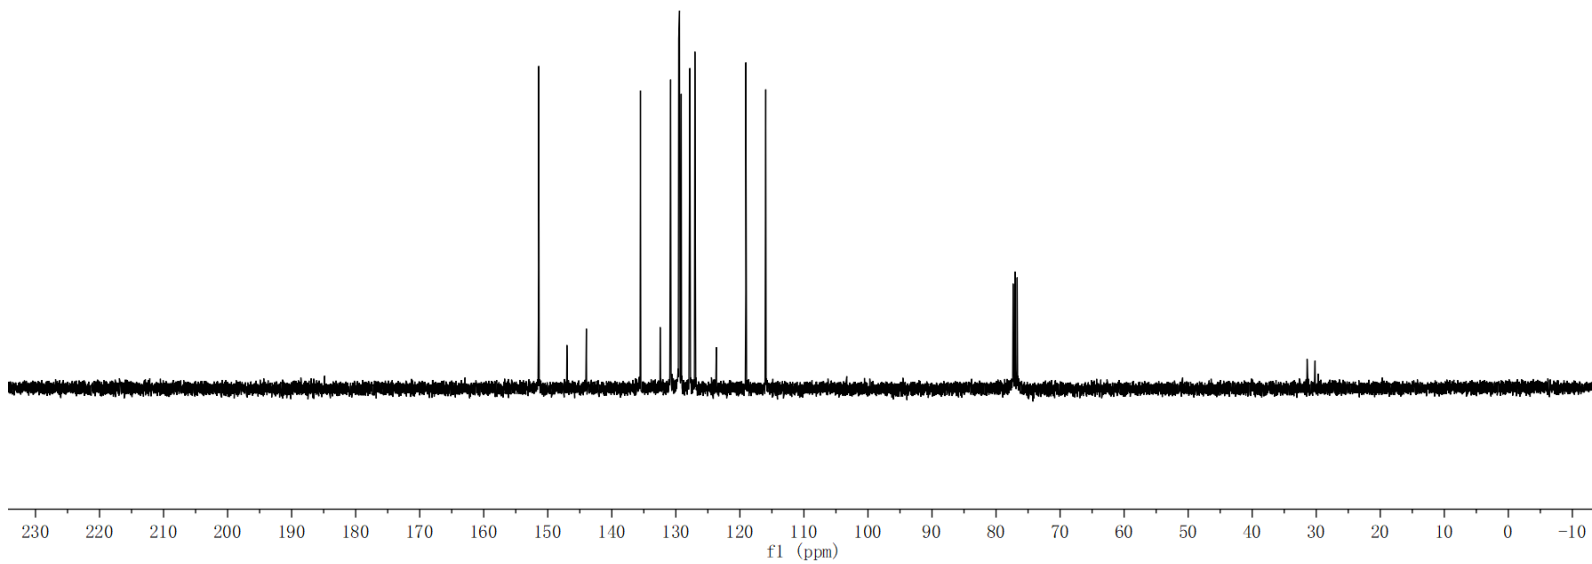

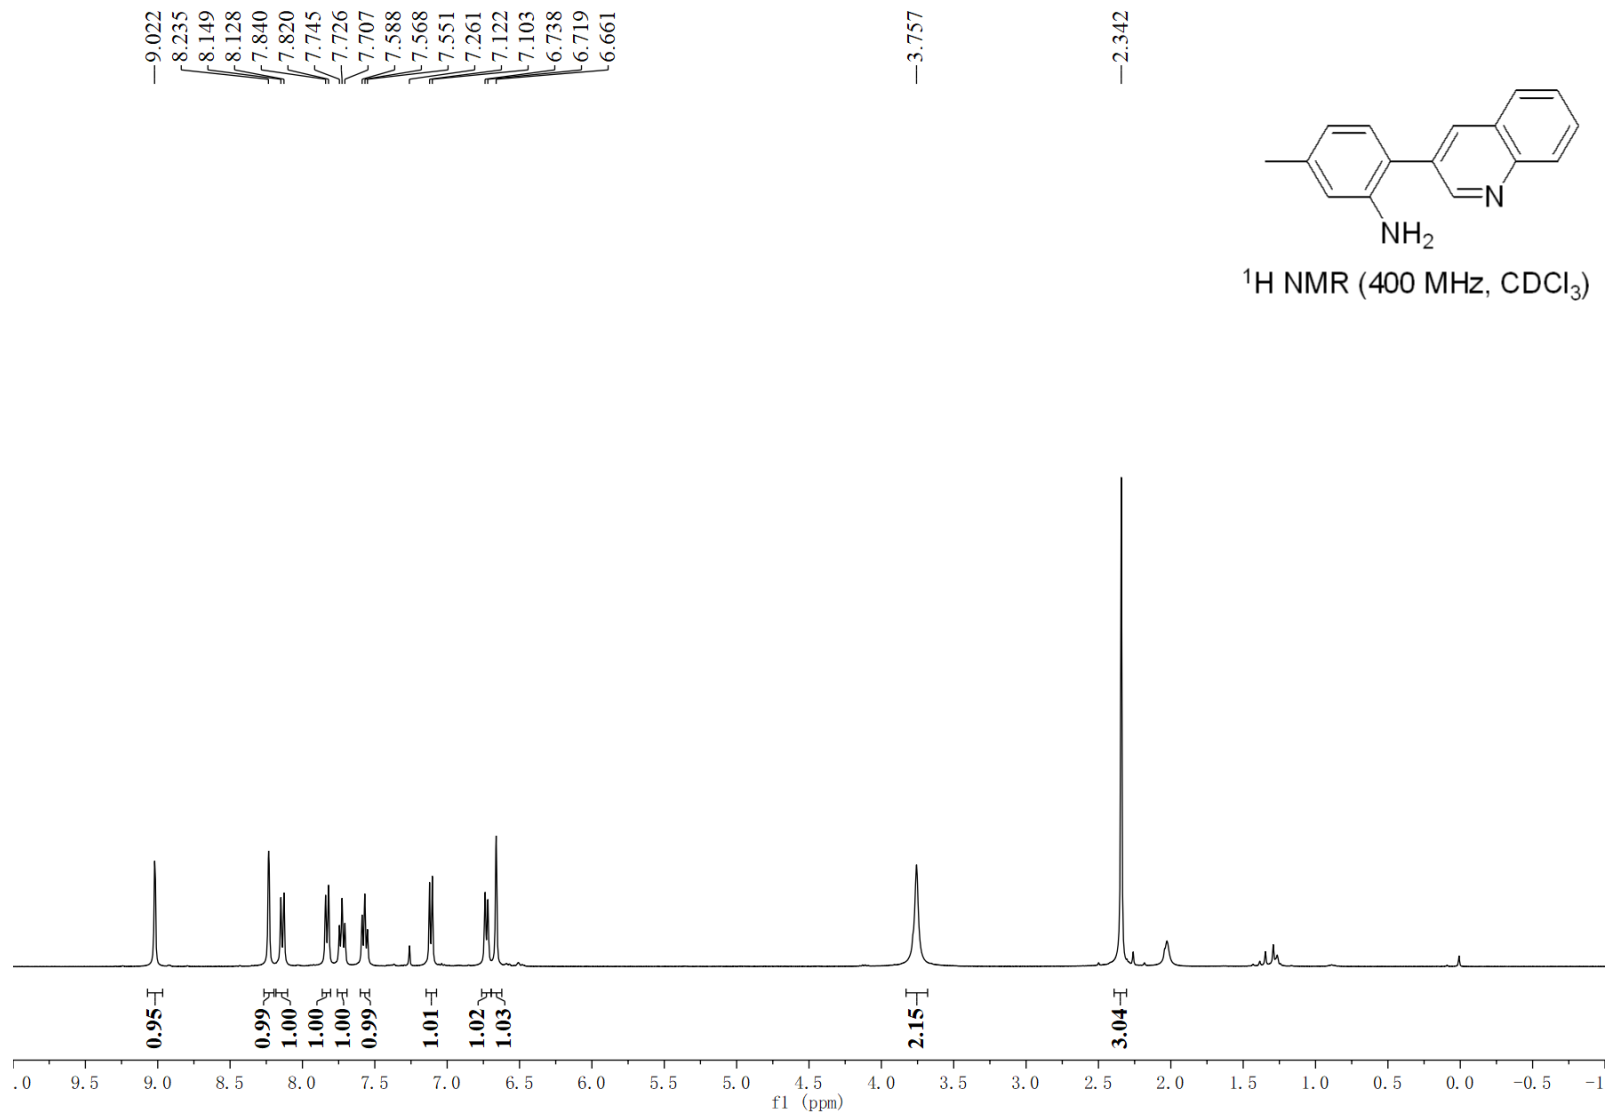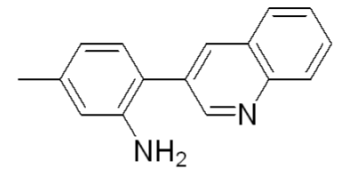

151.664  
147.024  
143.822  
139.489  
135.303  
132.488  
130.720  
129.375  
129.221  
127.958  
127.776  
126.930  
121.054  
120.063  
116.611

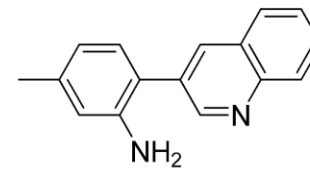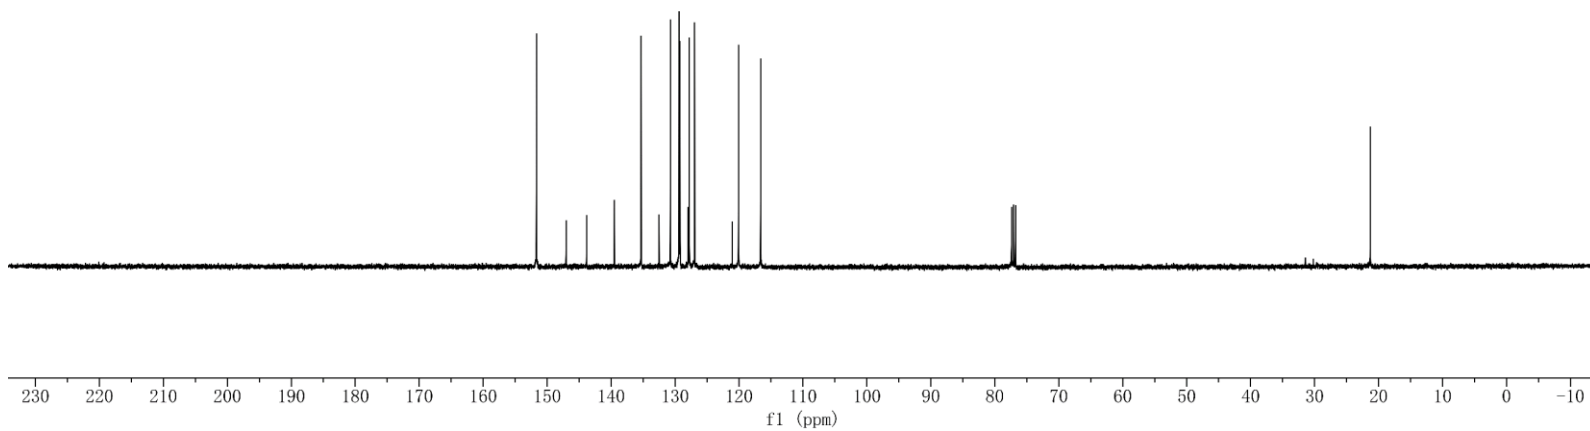

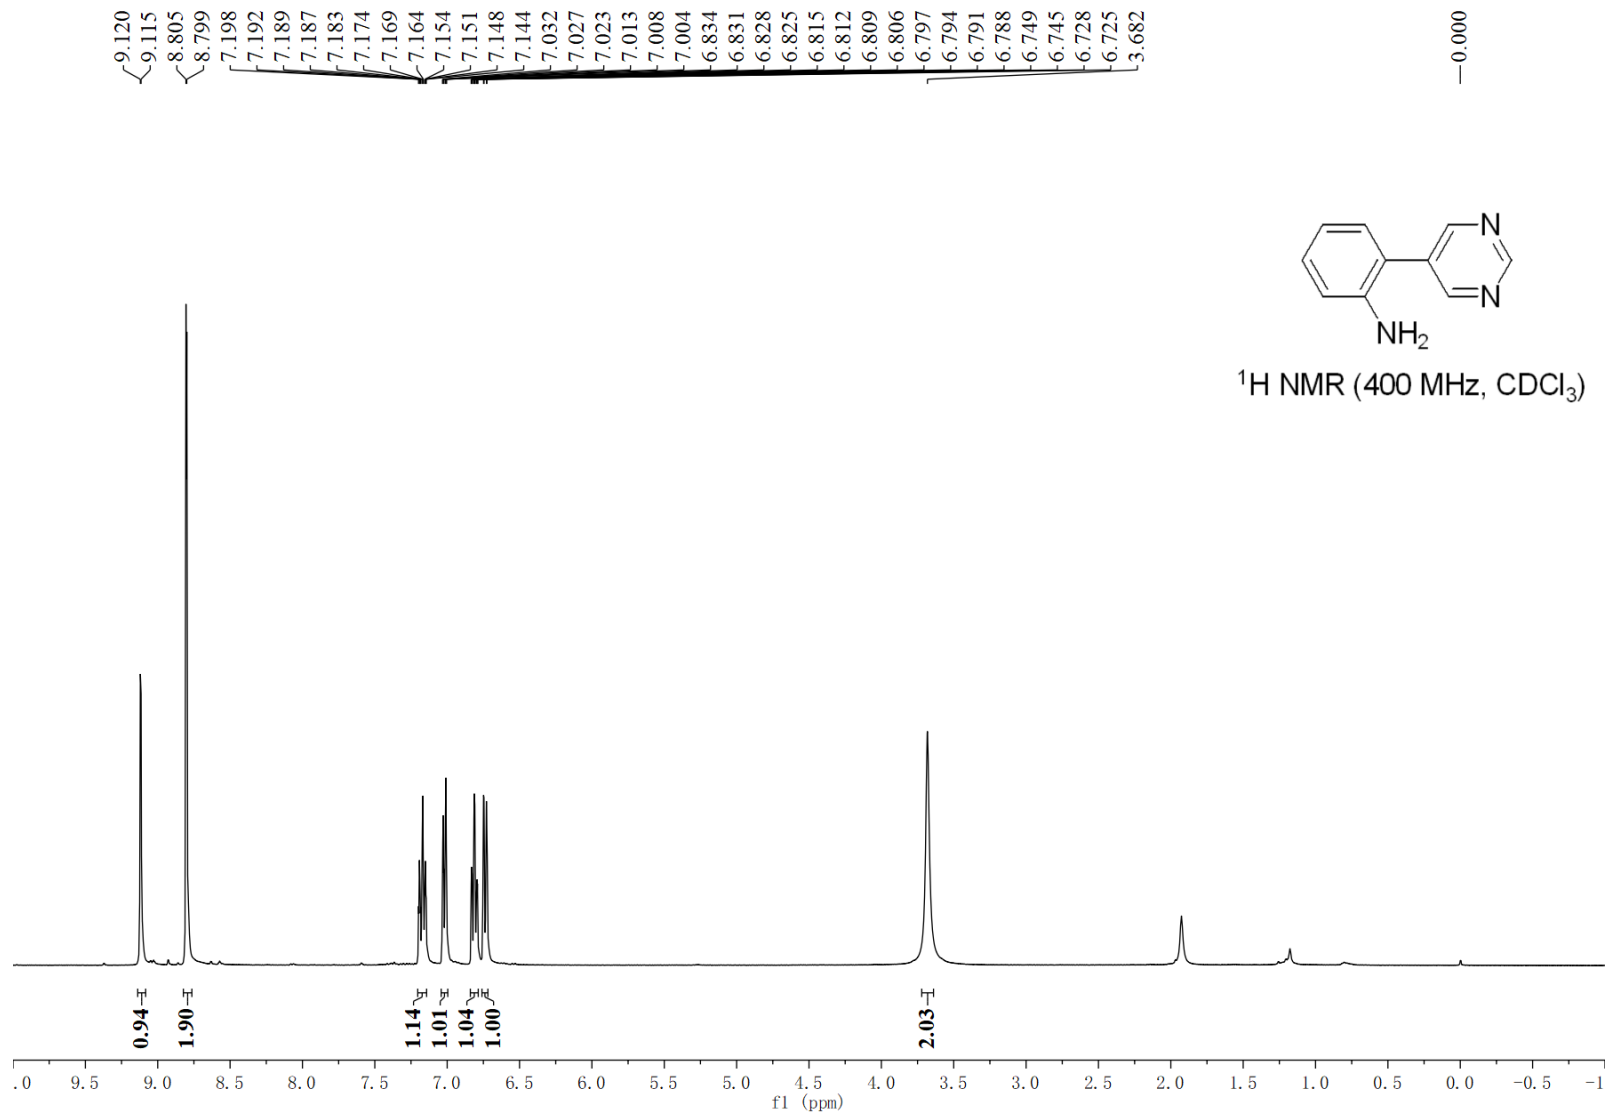

157.363  
156.947  
— 143.850  
133.375  
130.537  
130.245  
119.881  
119.310  
116.243

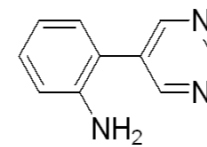

<sup>13</sup>C NMR (100 MHz, CDCl<sub>3</sub>)

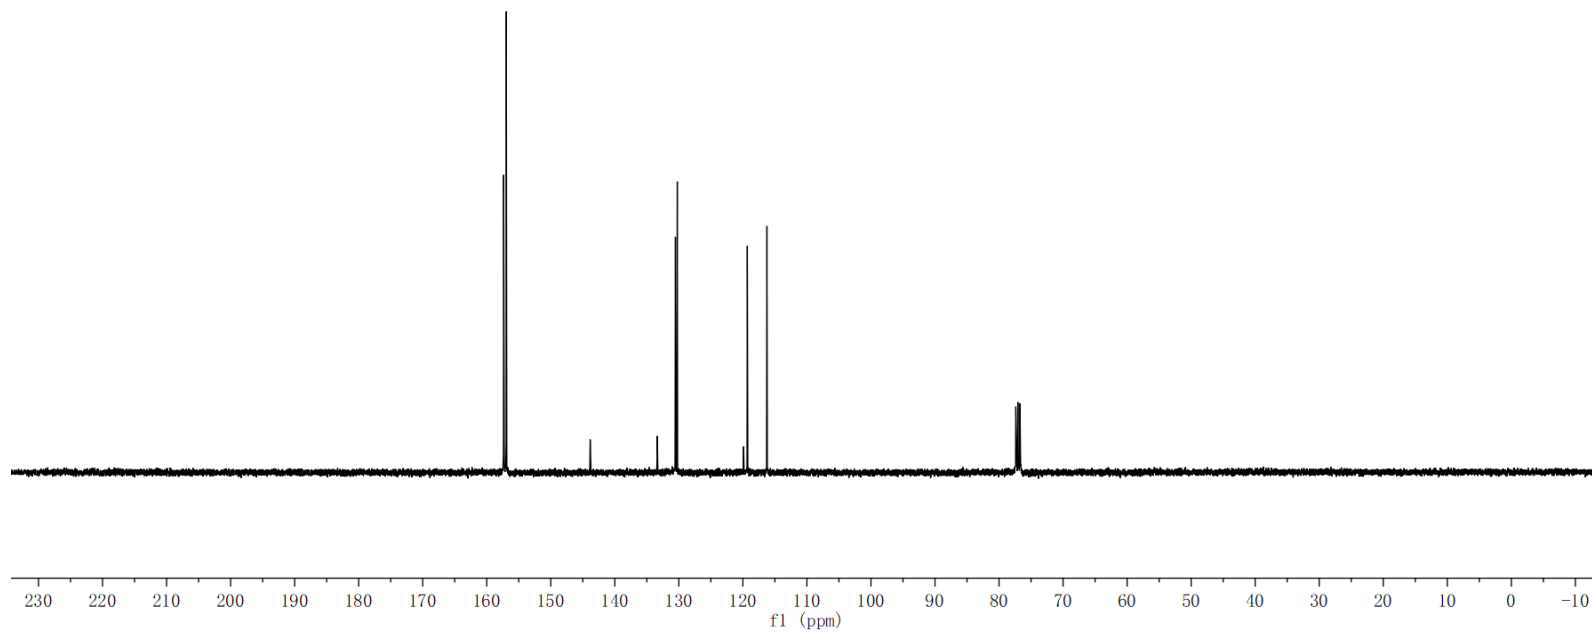

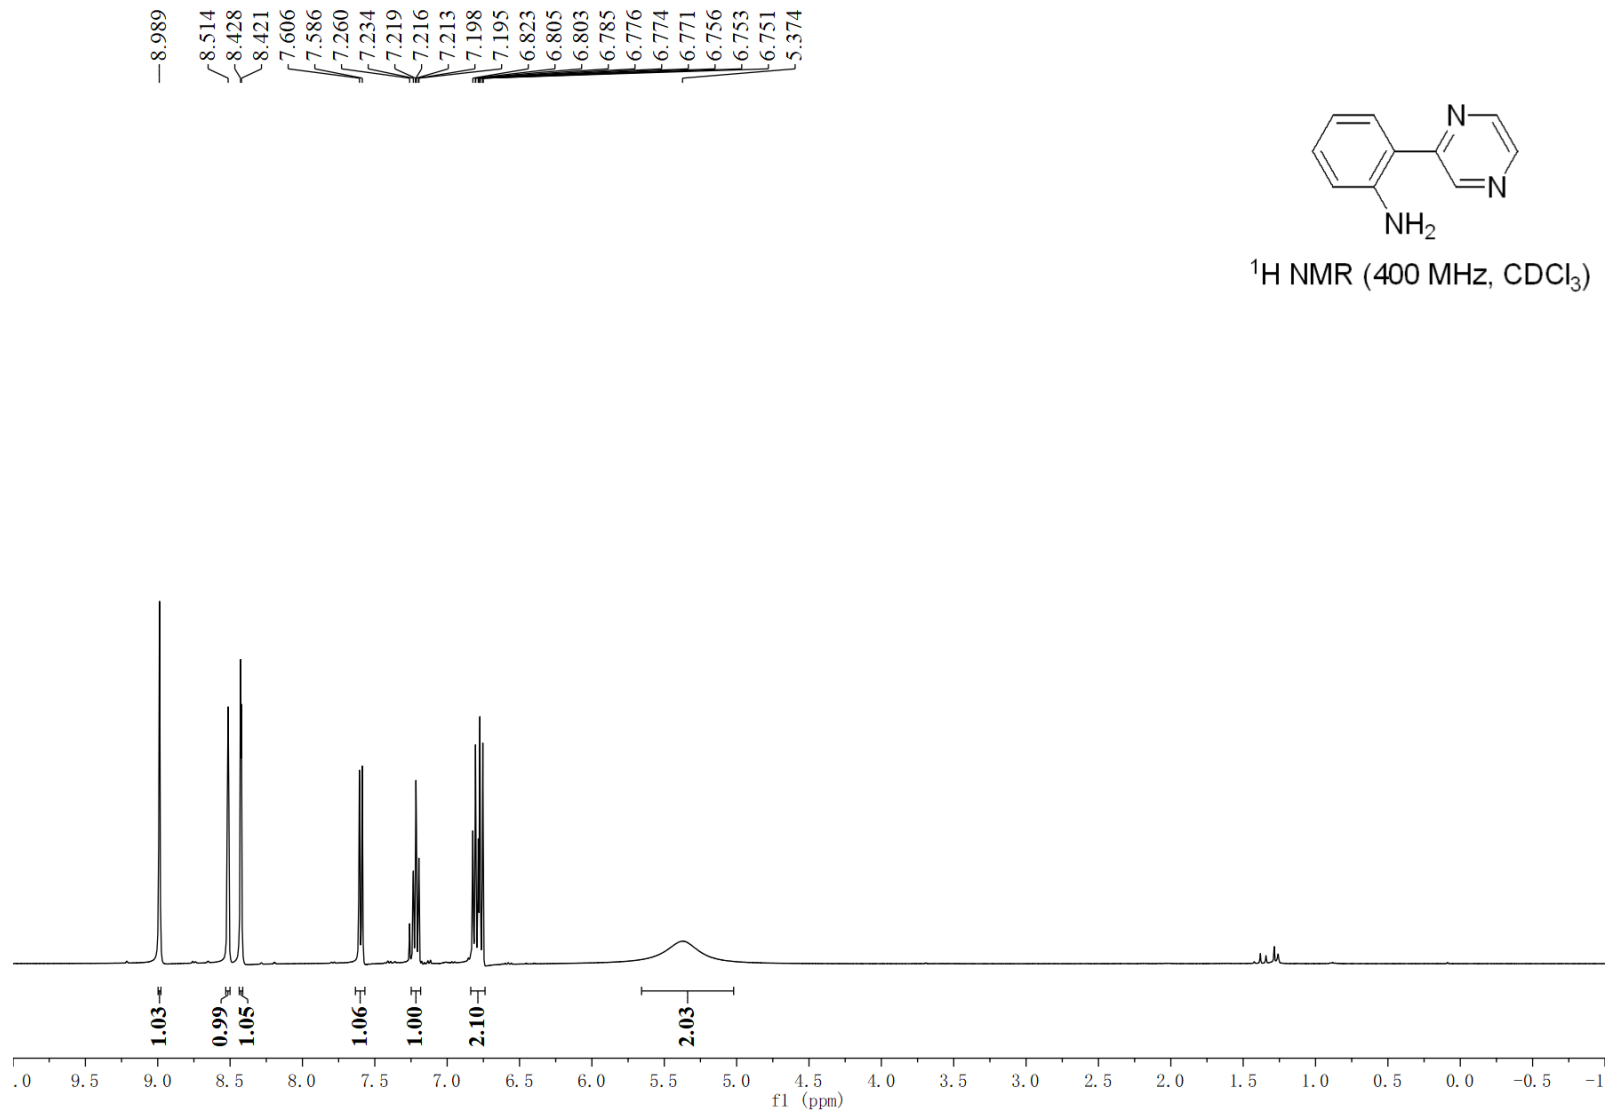

154.766  
147.150  
143.697  
141.811  
141.073  
130.965  
128.952  
118.475  
117.772  
117.427

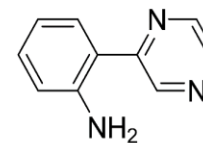

<sup>13</sup>C NMR (100 MHz, CDCl<sub>3</sub>)

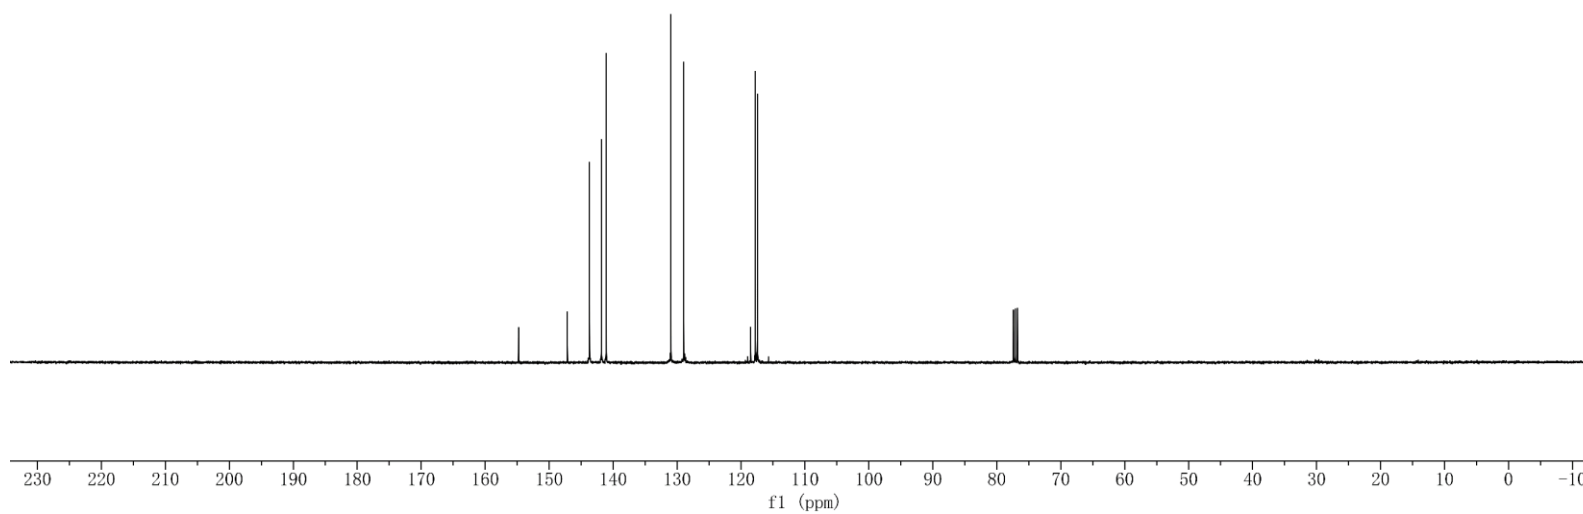

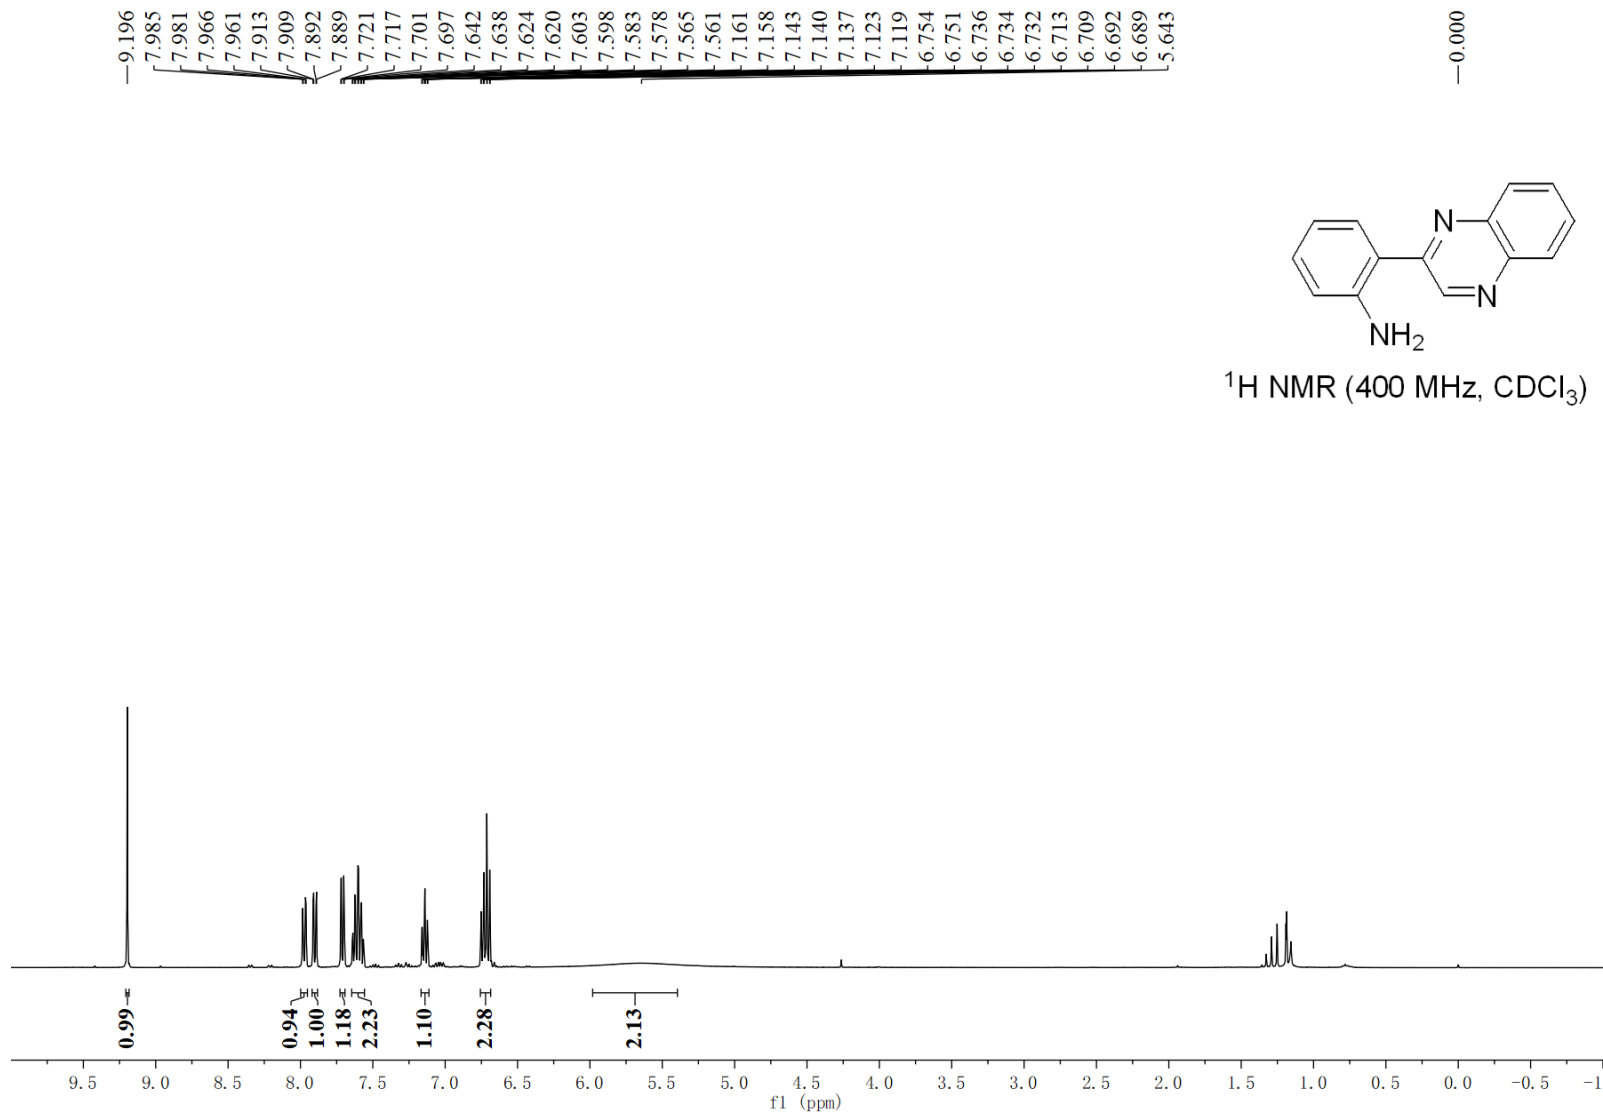



153.458  
148.102  
144.634  
140.431  
140.090  
131.274  
130.144  
129.274  
129.044  
129.016  
128.554  
118.113  
117.537  
117.465

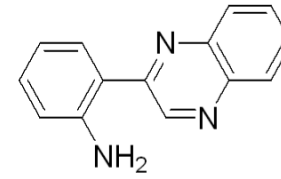

$^{13}\text{C}$  NMR (100 MHz,  $\text{CDCl}_3$ )

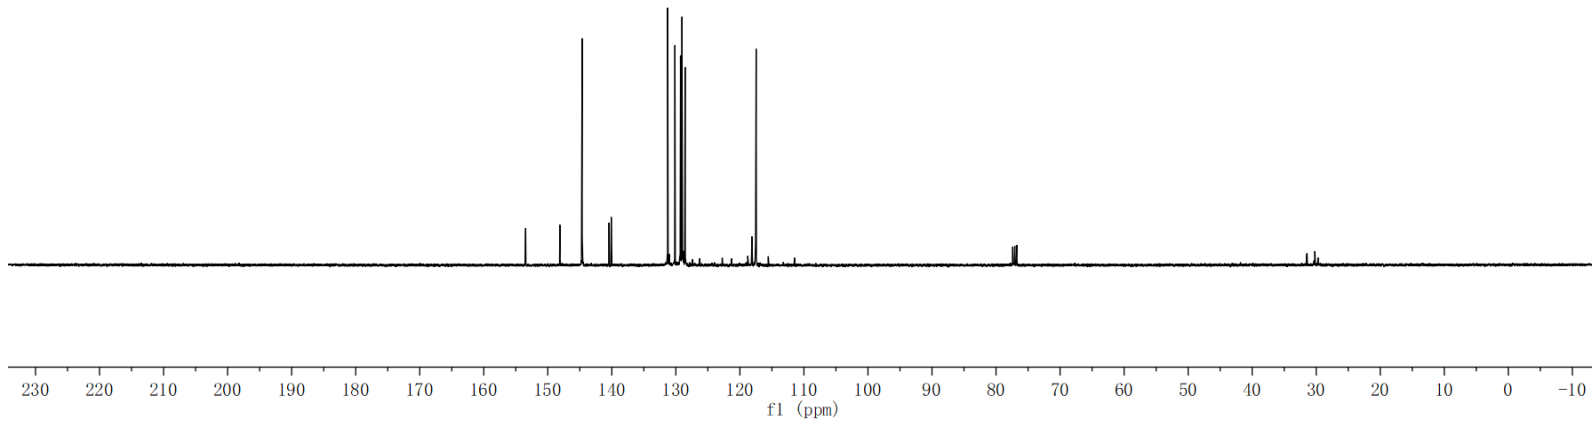

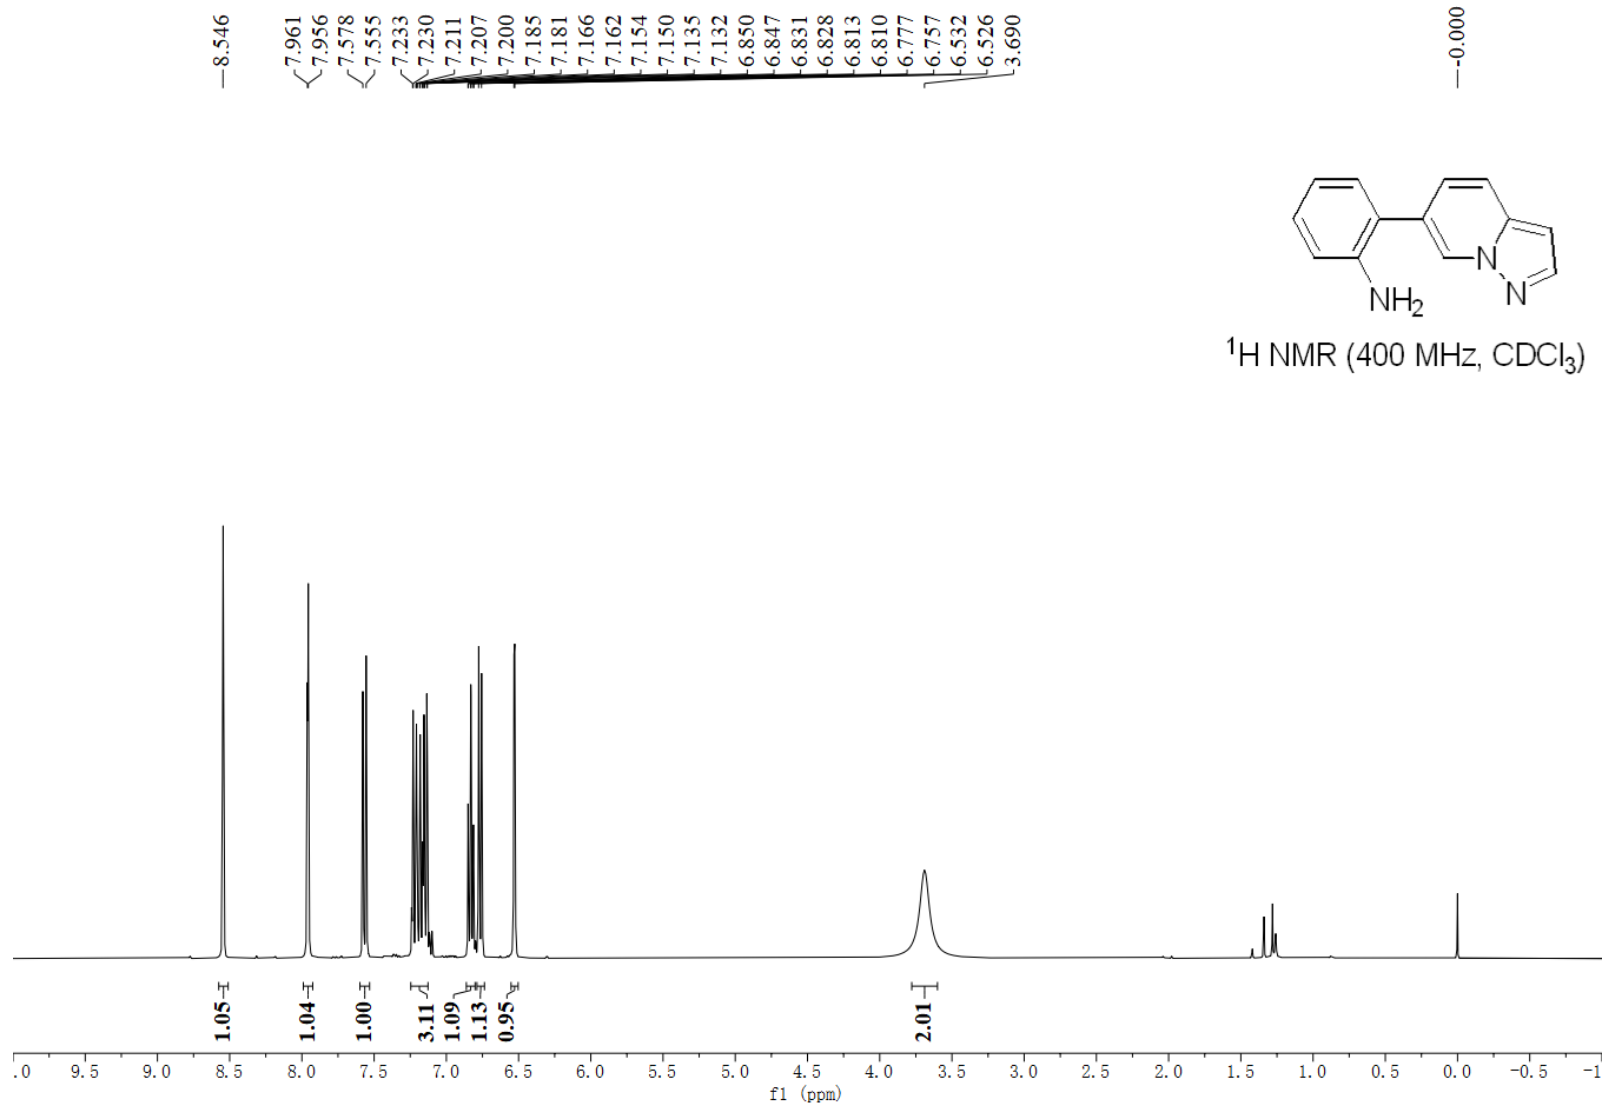

144.163  
142.192  
139.056  
130.608  
129.269  
127.744  
125.532  
123.902  
123.006  
118.851  
118.009  
115.835  
96.878

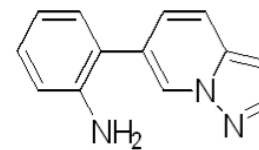

<sup>13</sup>C NMR (101 MHz, CDCl<sub>3</sub>)

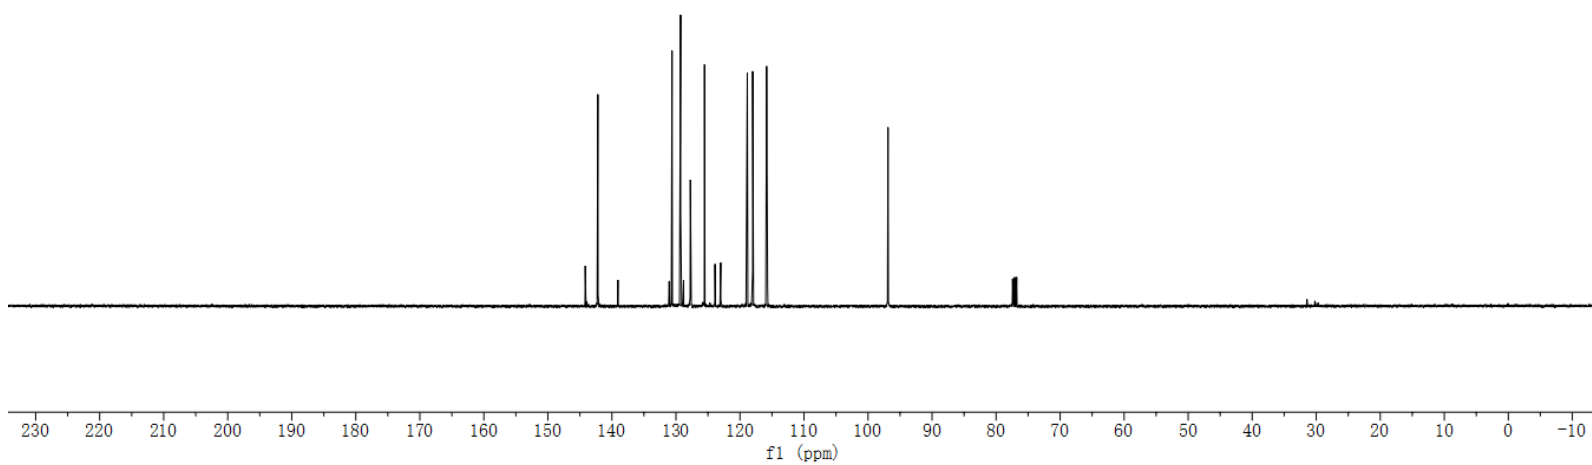

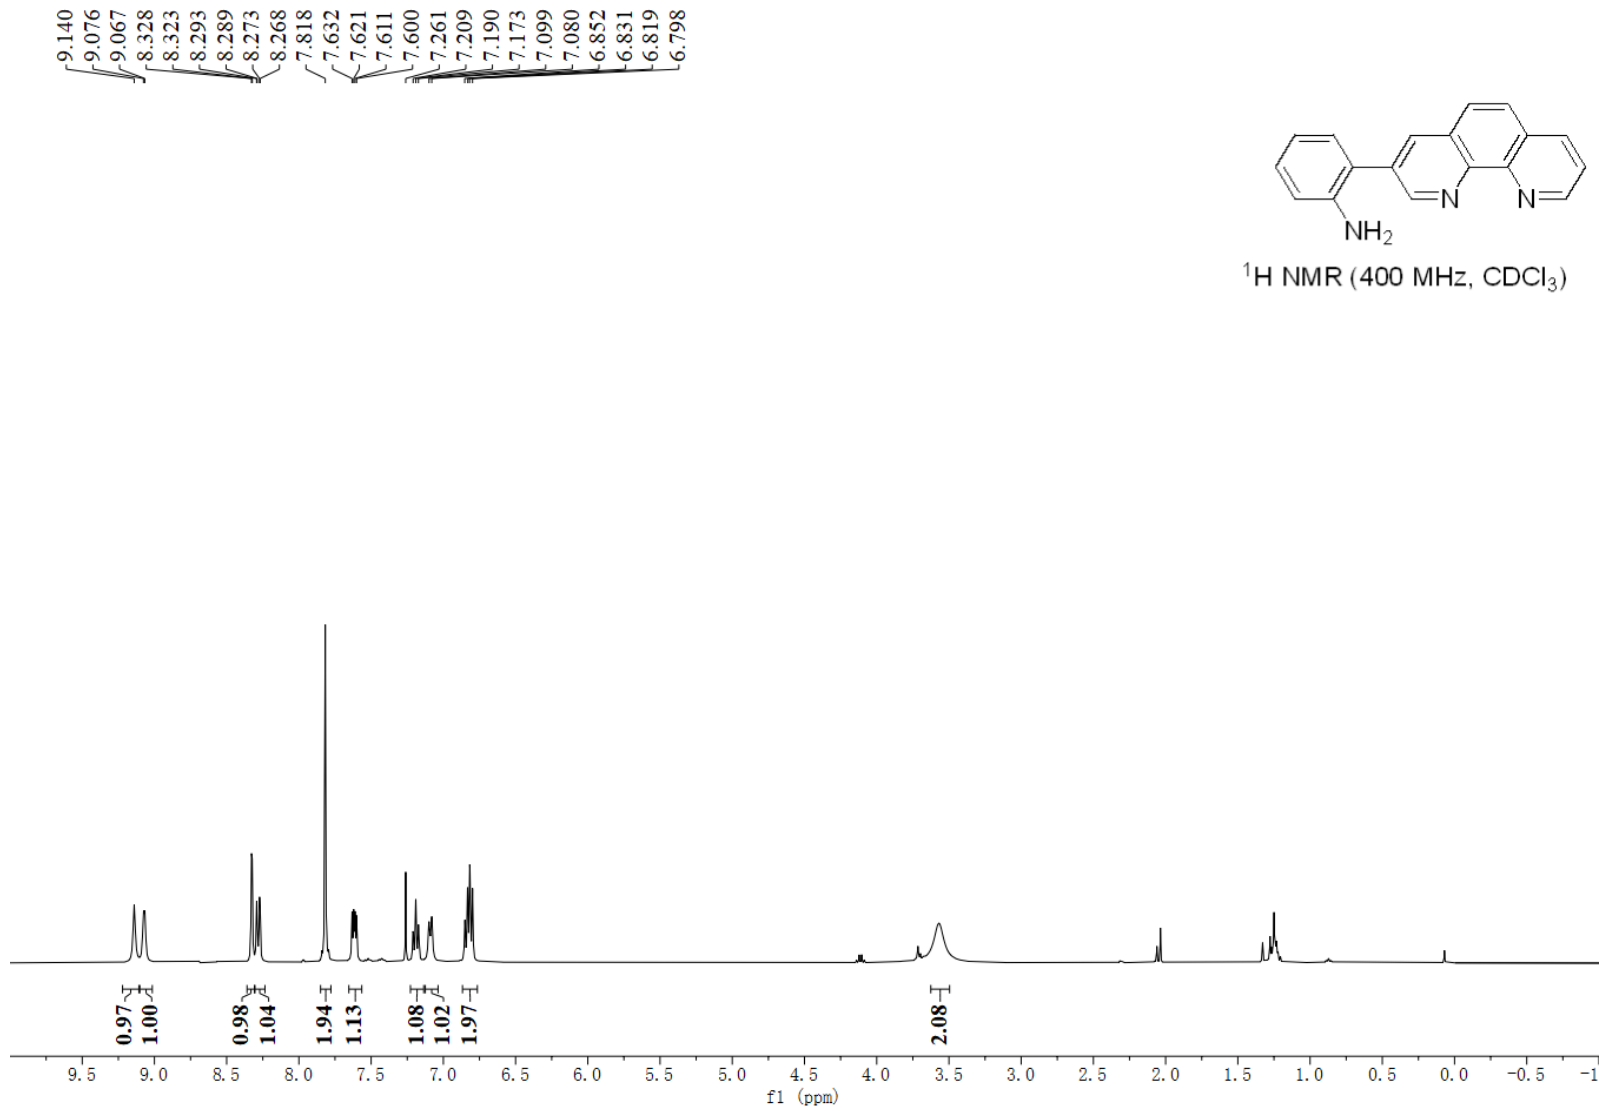

152.815  
149.385  
145.762  
144.180  
141.546  
136.530  
128.899  
128.613  
128.415  
128.200  
123.688  
123.211  
122.871  
122.429  
120.542  
120.294  
118.158  
111.783

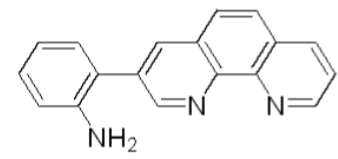

<sup>13</sup>C NMR (101 MHz, CDCl<sub>3</sub>)

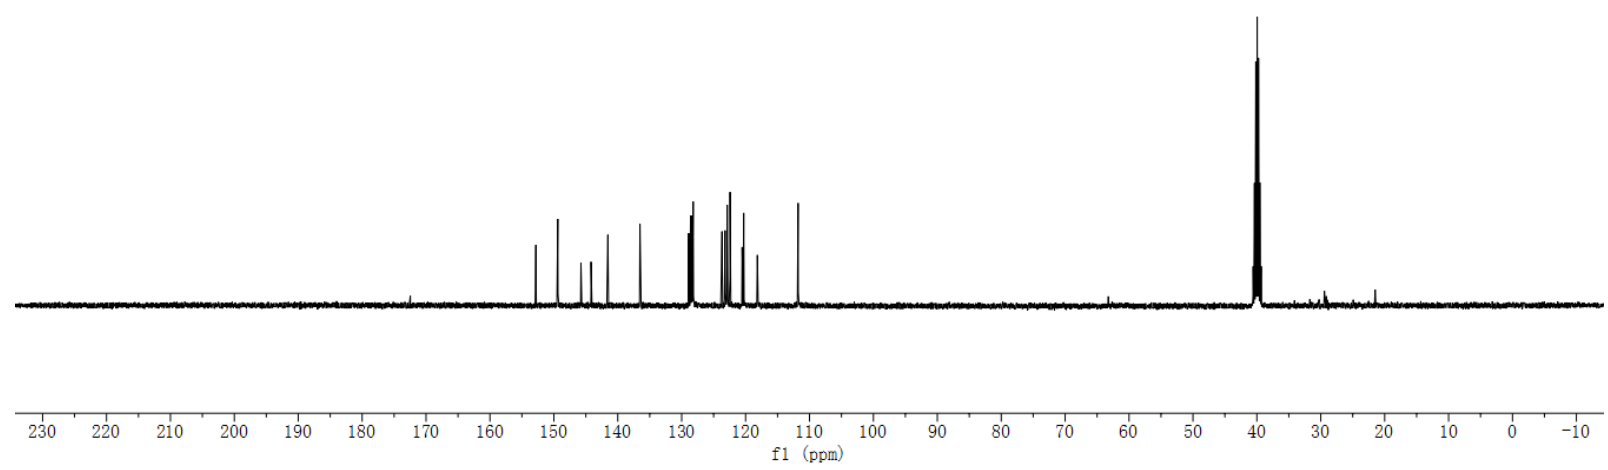

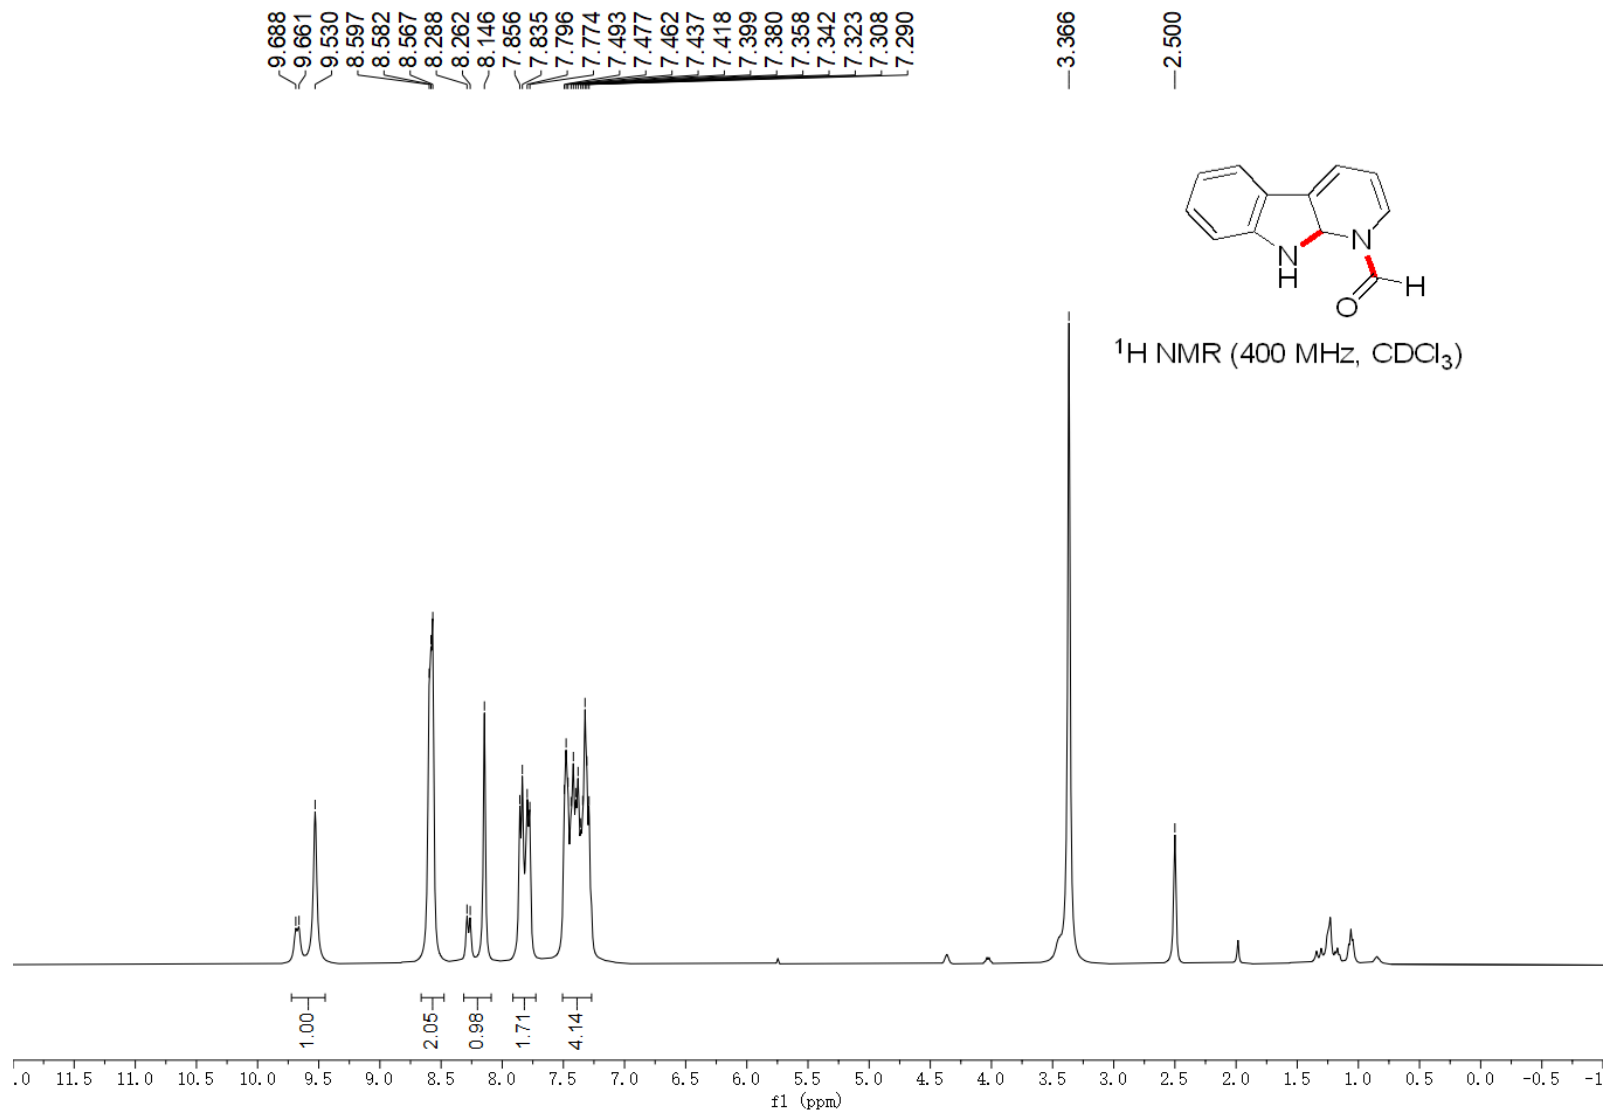

— 162.883  
— 159.738  
— 149.640  
— 148.621  
— 137.063  
— 131.209  
— 130.368  
— 129.230  
— 126.096  
— 125.247  
— 123.178  
— 120.928

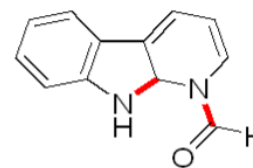

<sup>13</sup>C NMR (100 MHz, CDCl<sub>3</sub>)

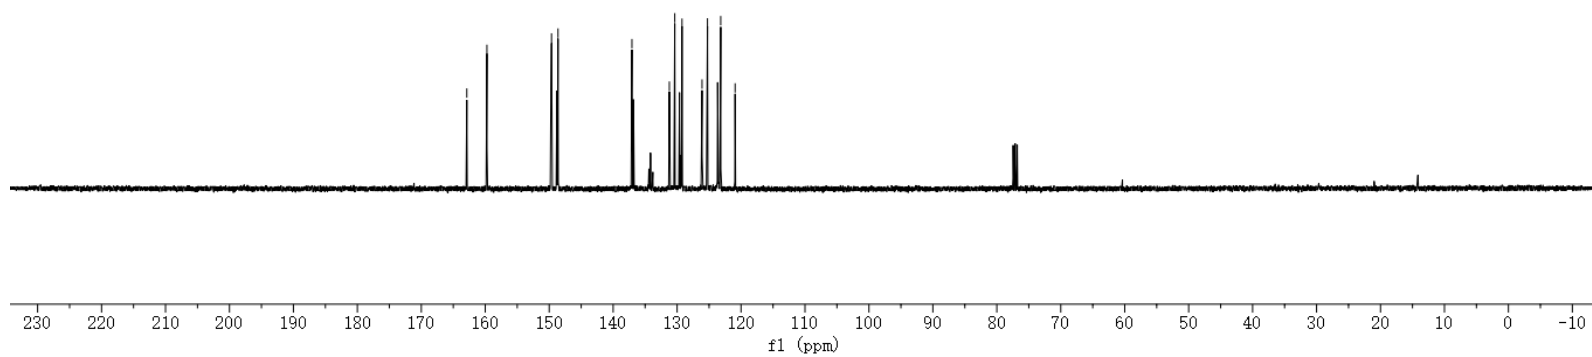

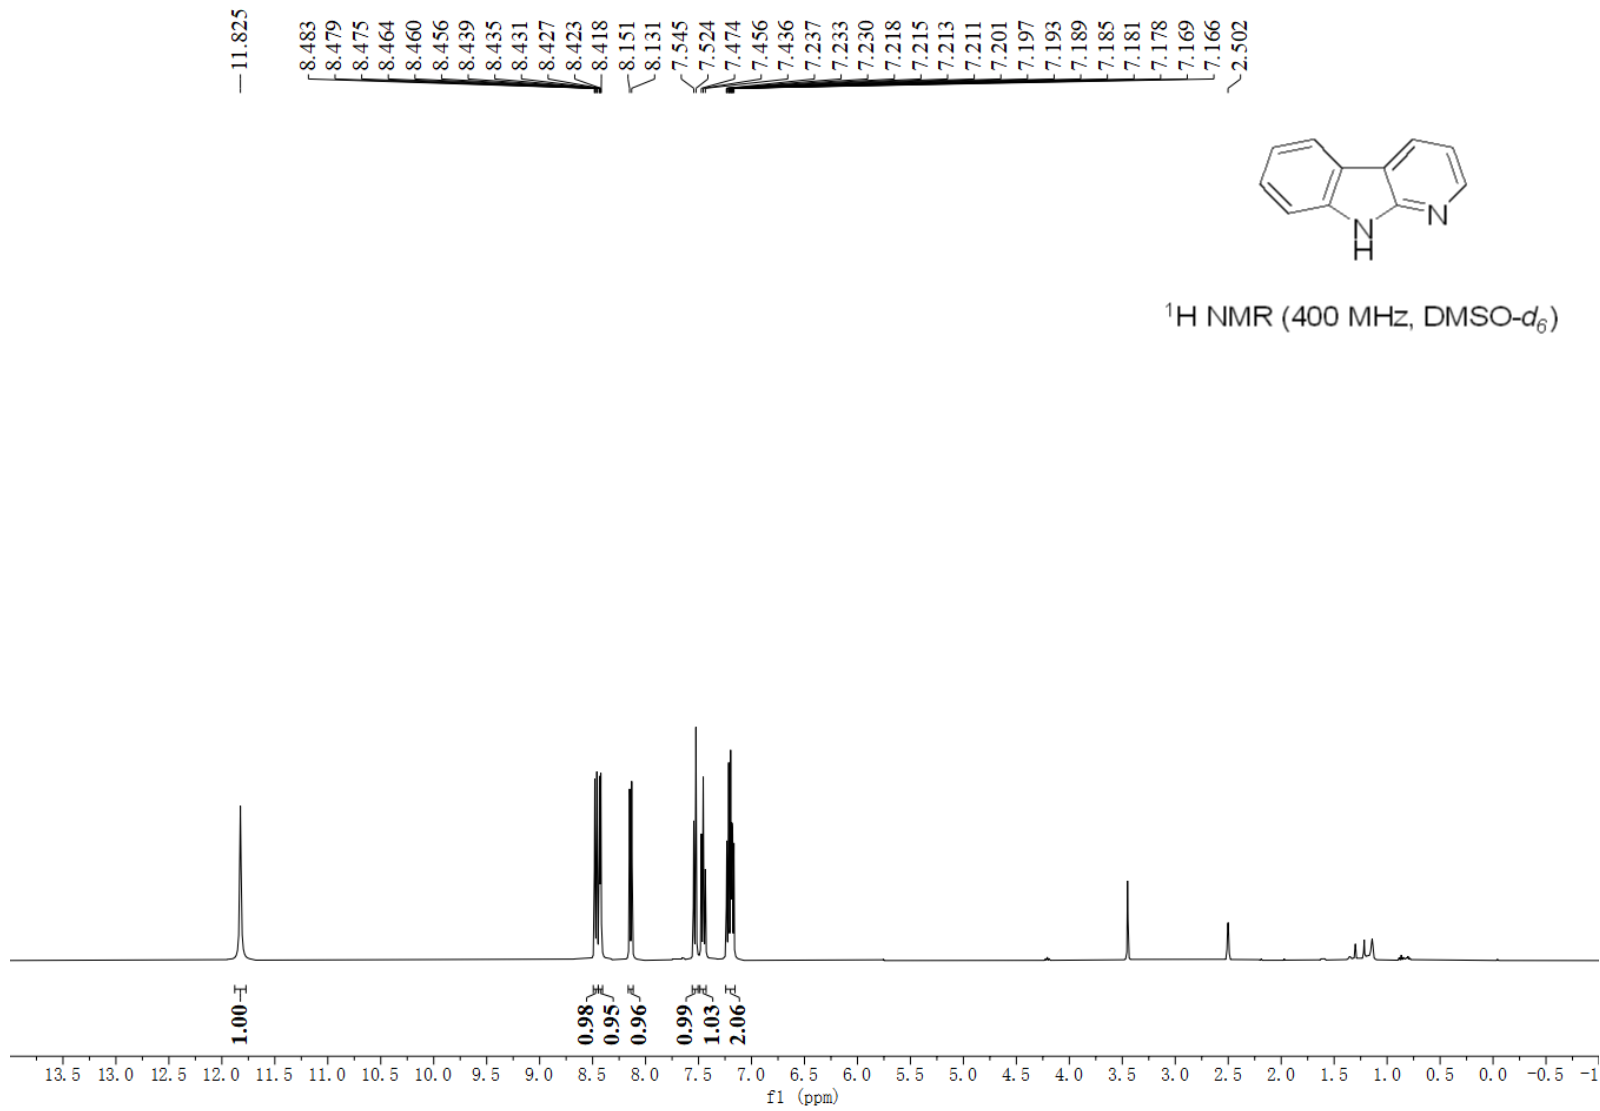



152.387  
146.486  
139.273  
128.753  
126.997  
121.545  
120.839  
119.811  
115.630  
115.360  
111.681

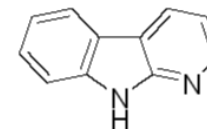

<sup>13</sup>C NMR (101 MHz, DMSO-d<sub>6</sub>)

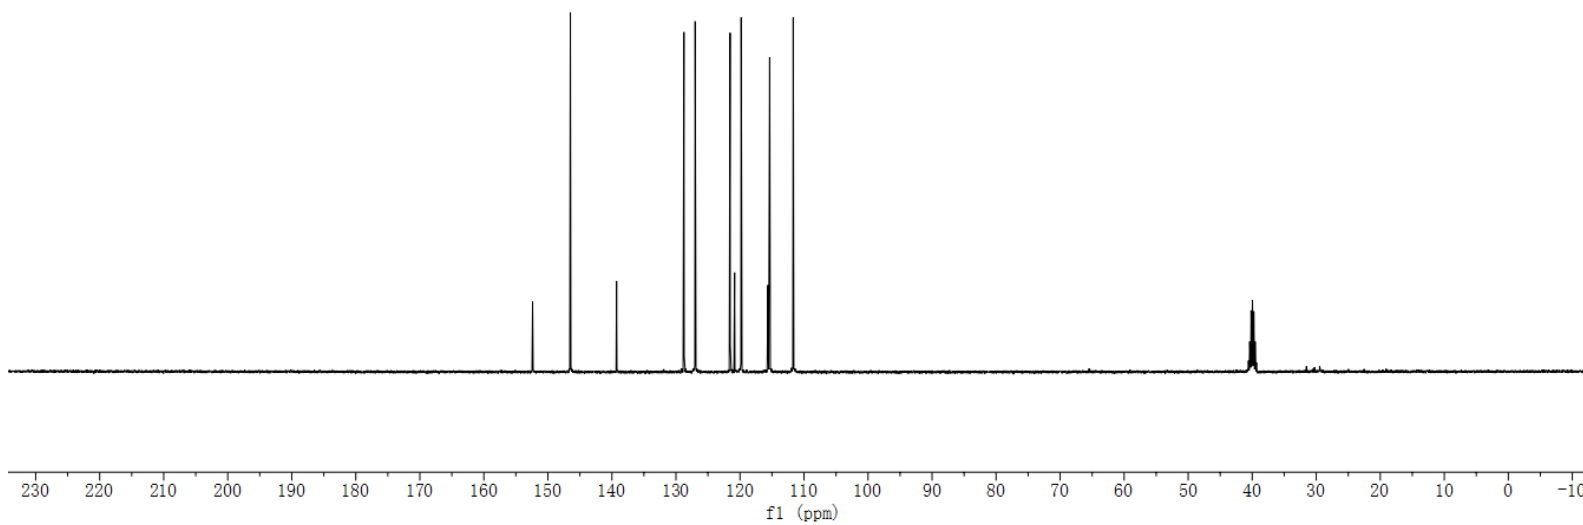

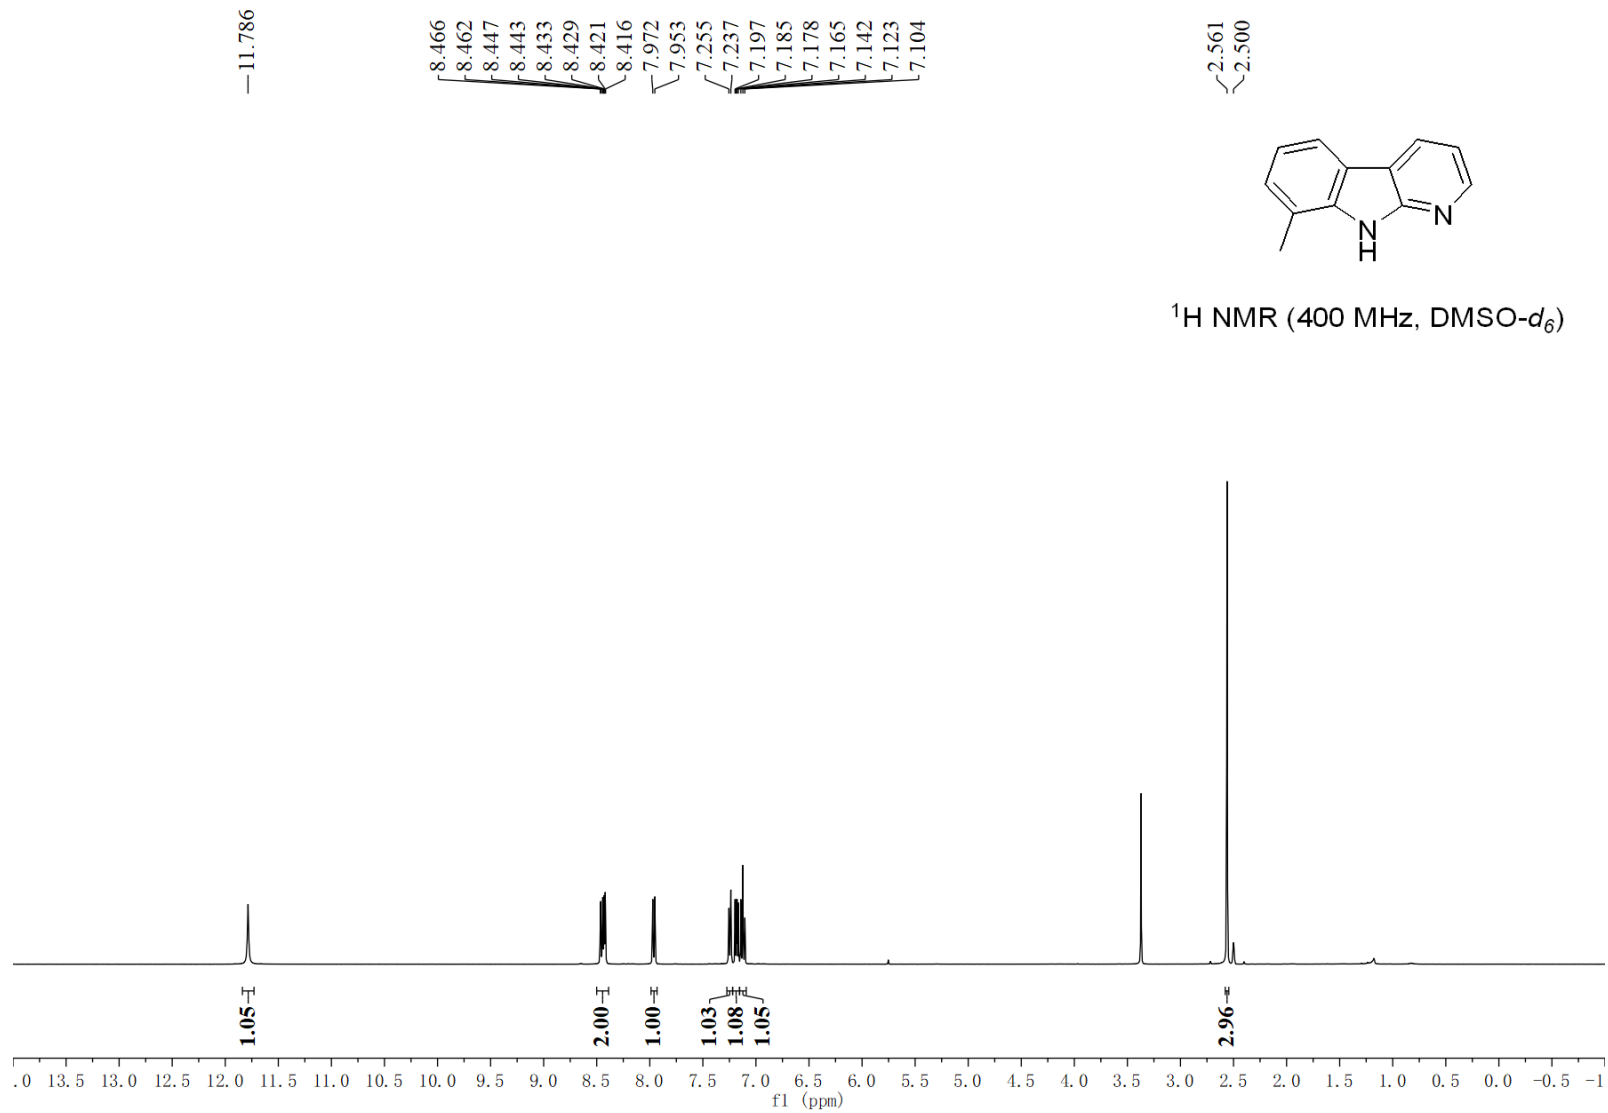

152.567  
146.341  
138.532  
128.762  
127.513  
121.091  
120.432  
119.930  
118.881  
115.993  
115.350

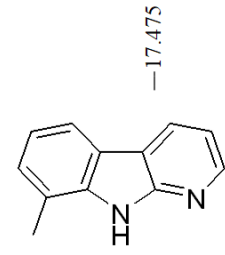

<sup>1</sup>H NMR (400 MHz, DMSO-d<sub>6</sub>)

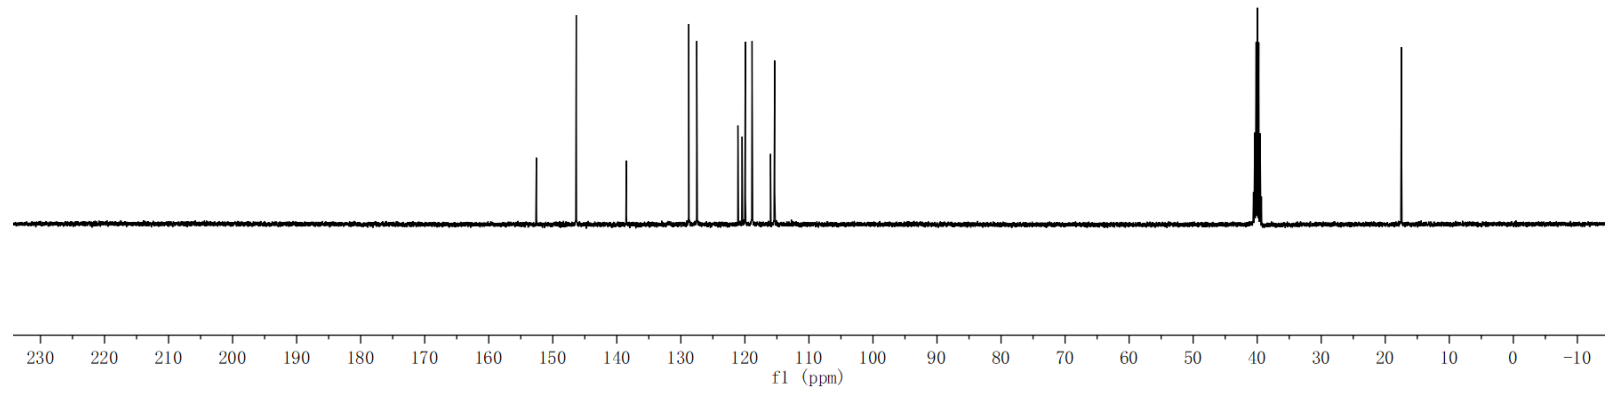

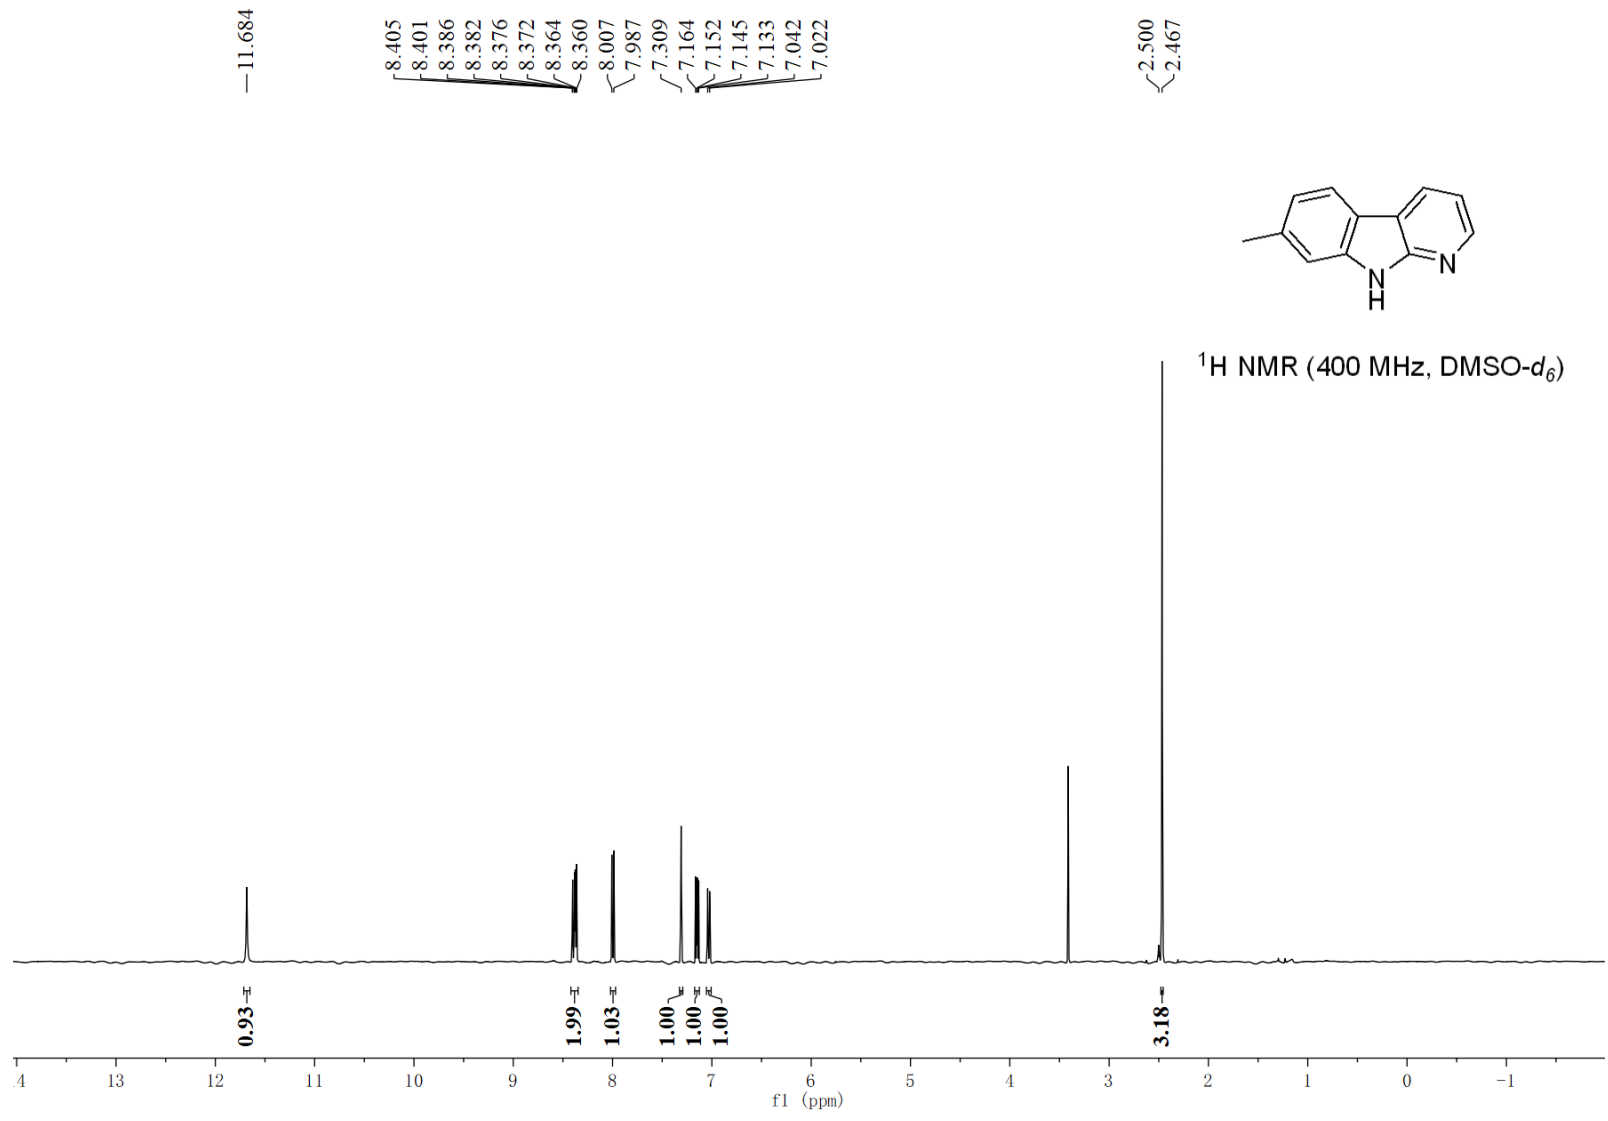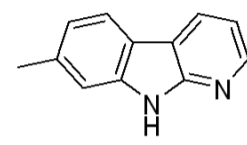

152.450  
145.809  
139.695  
136.679  
128.212  
121.314  
121.260  
118.515  
115.762  
115.234  
111.640

22.193

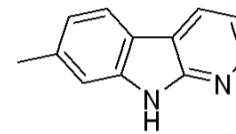

<sup>1</sup>H NMR (400 MHz, DMSO-d<sub>6</sub>)

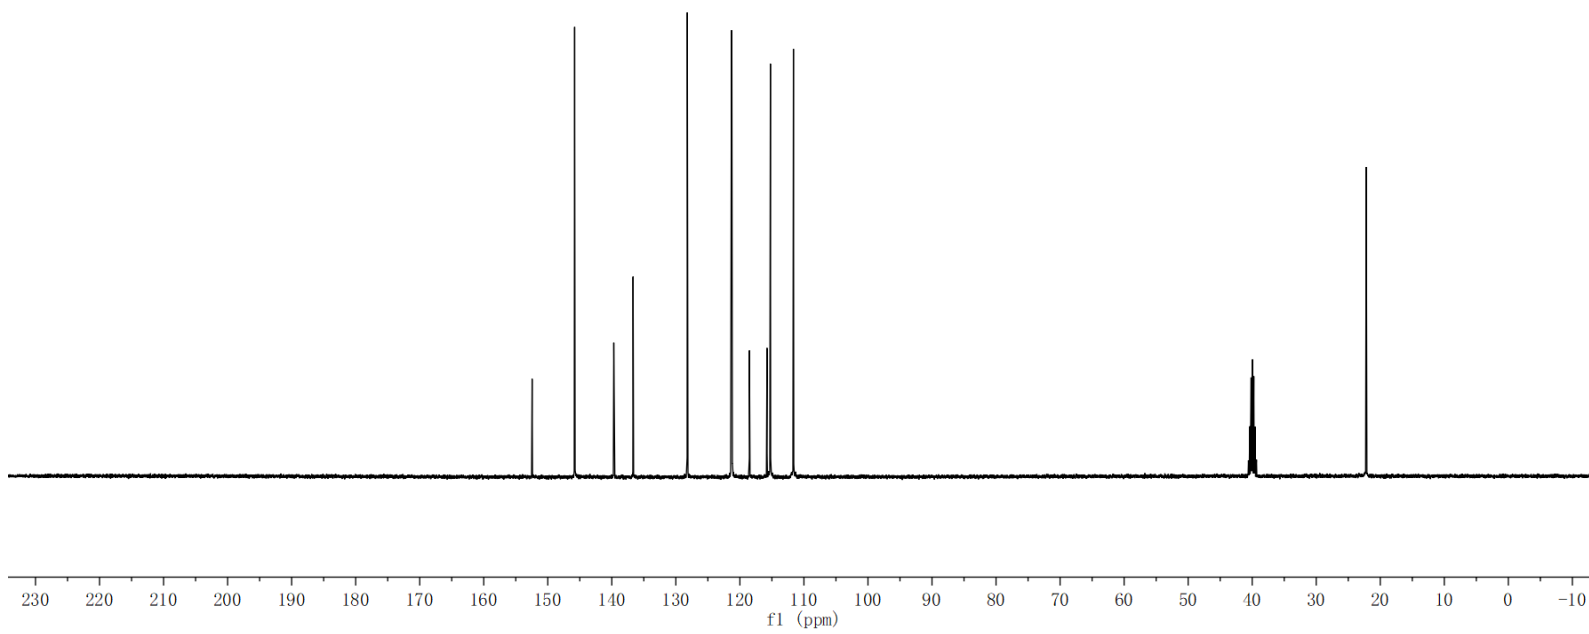

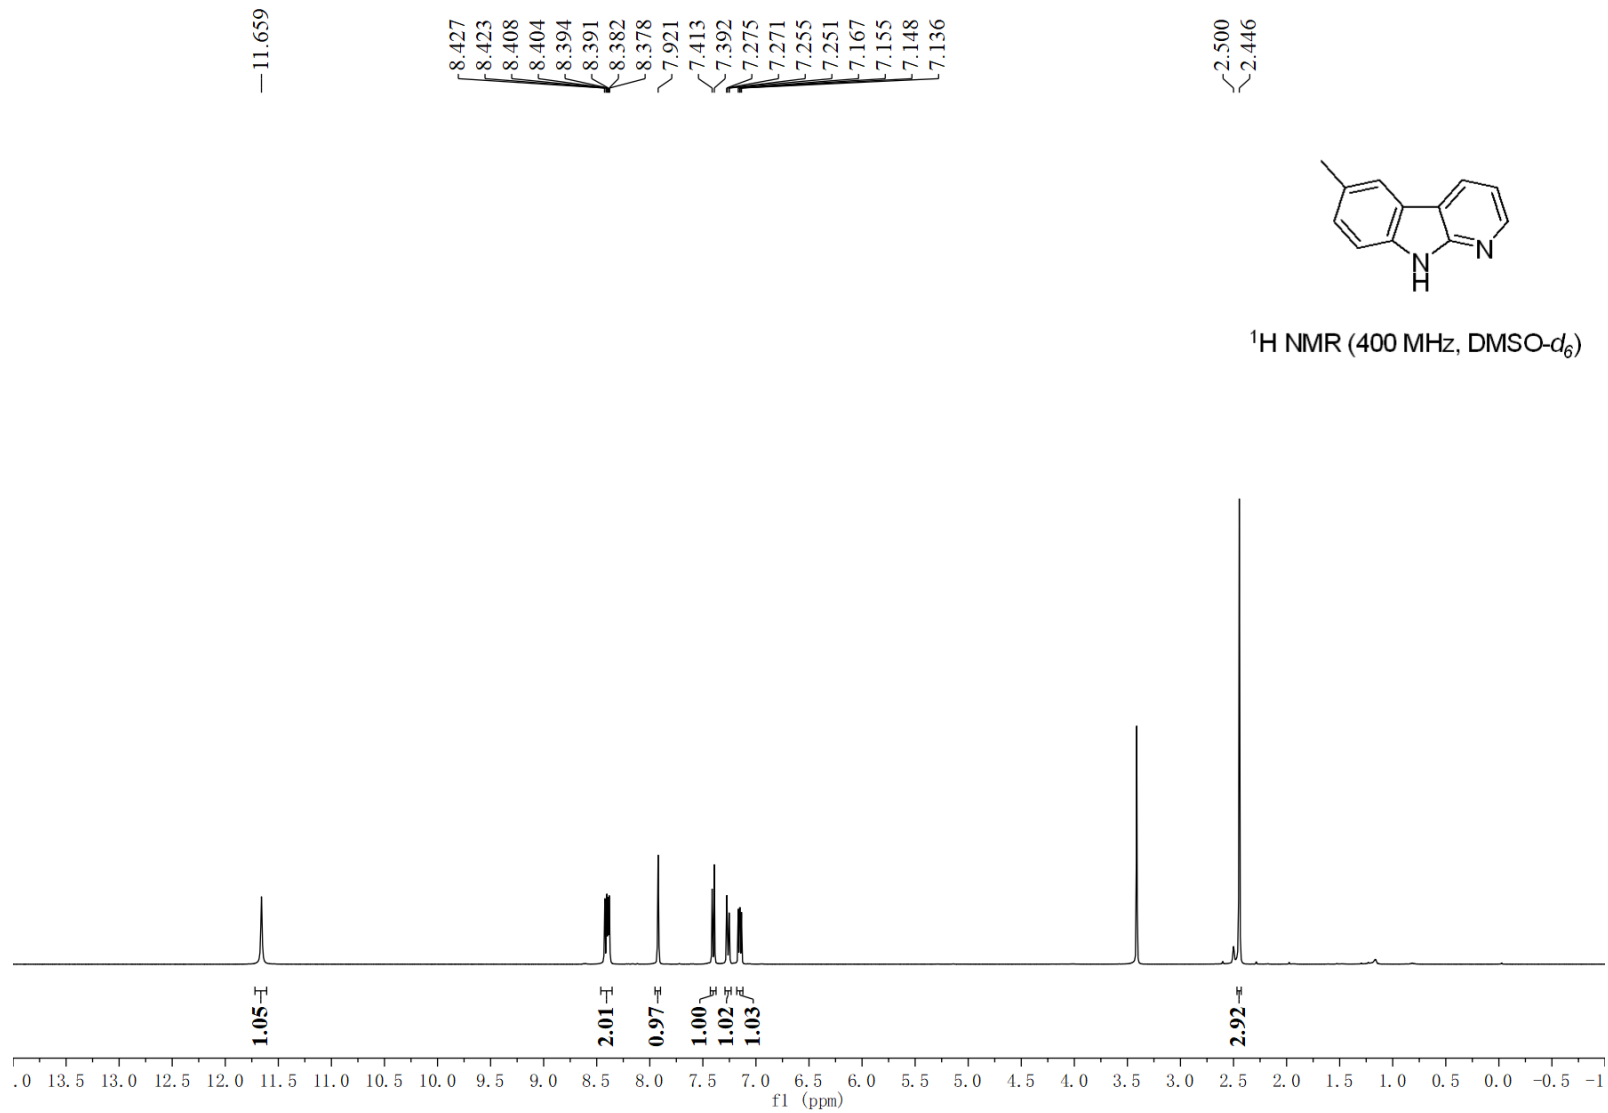

—152.551  
—146.268  
—137.401  
—128.580  
—128.531  
—128.284  
—121.262  
—120.930  
—115.481  
—115.144  
—111.392

—21.492

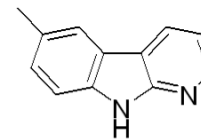

<sup>13</sup>C NMR (100 MHz, DMSO-d<sub>6</sub>)

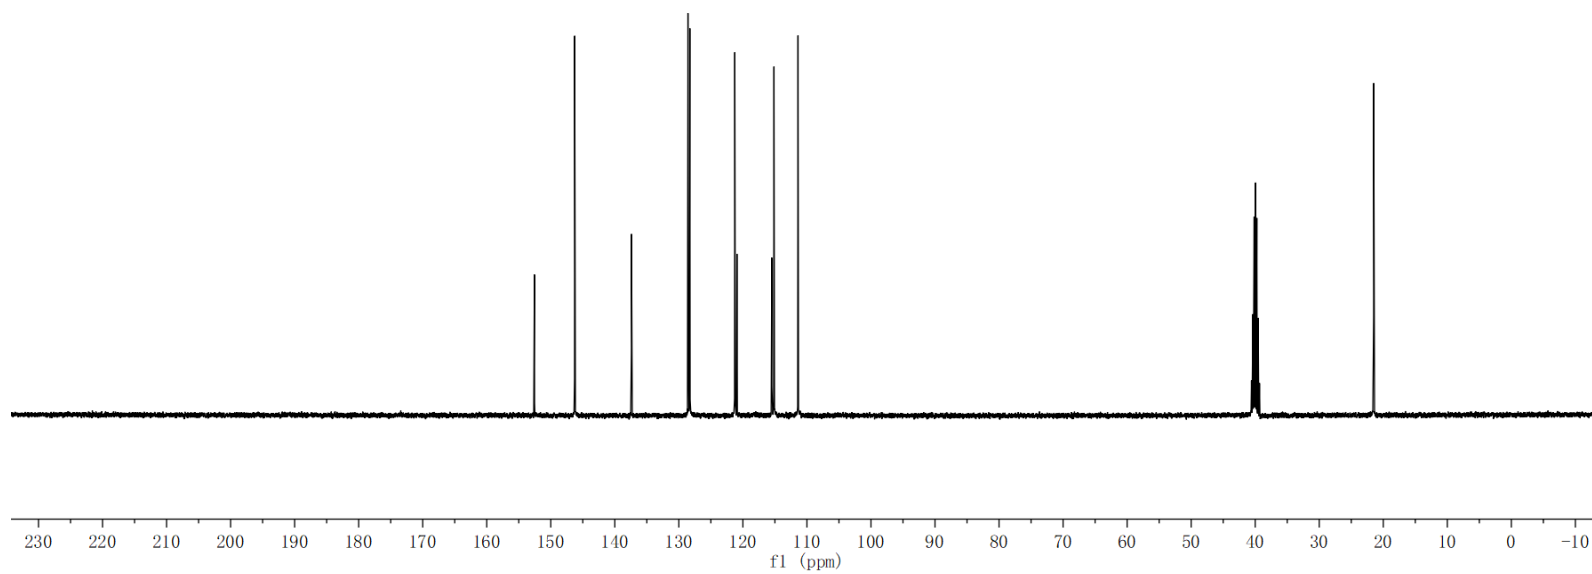

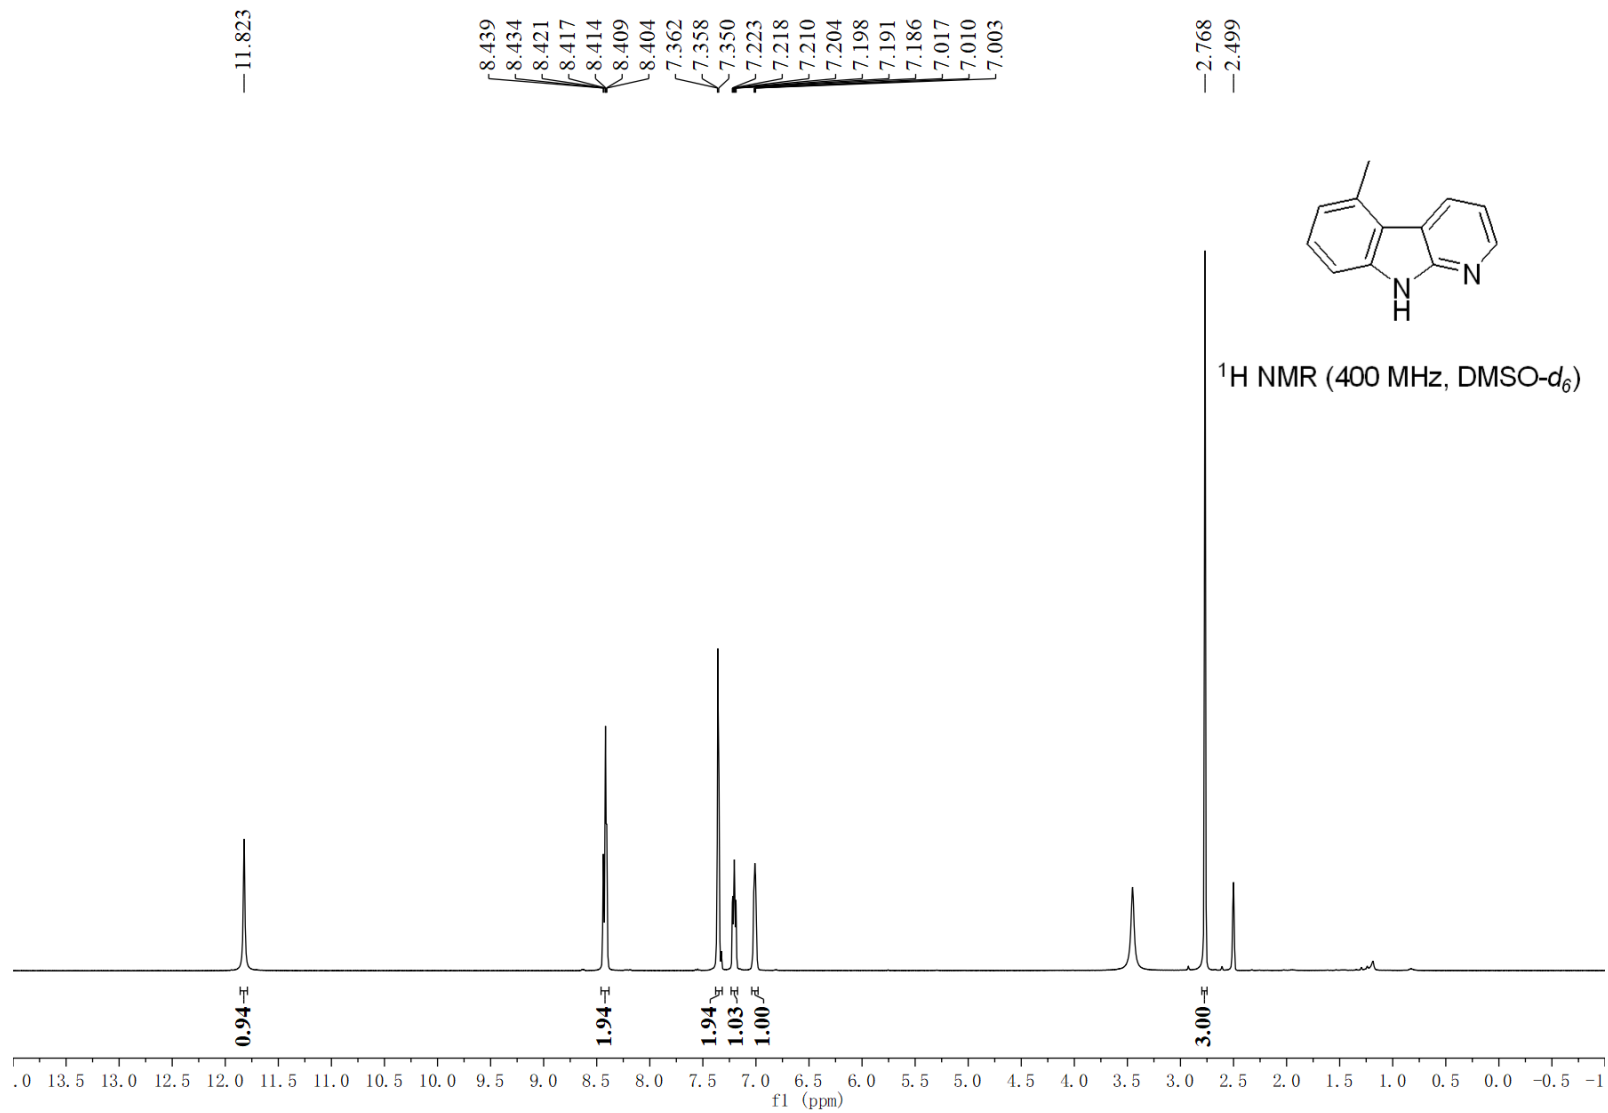



~152.115  
~145.679  
~139.225  
~133.723  
~130.340  
~126.862  
~121.101  
~119.411  
~116.046  
~115.334  
~109.233

—20.522

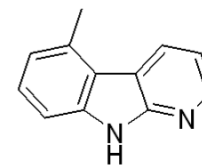

$^{13}\text{C}$  NMR (100 MHz,  $\text{DMSO-}d_6$ )

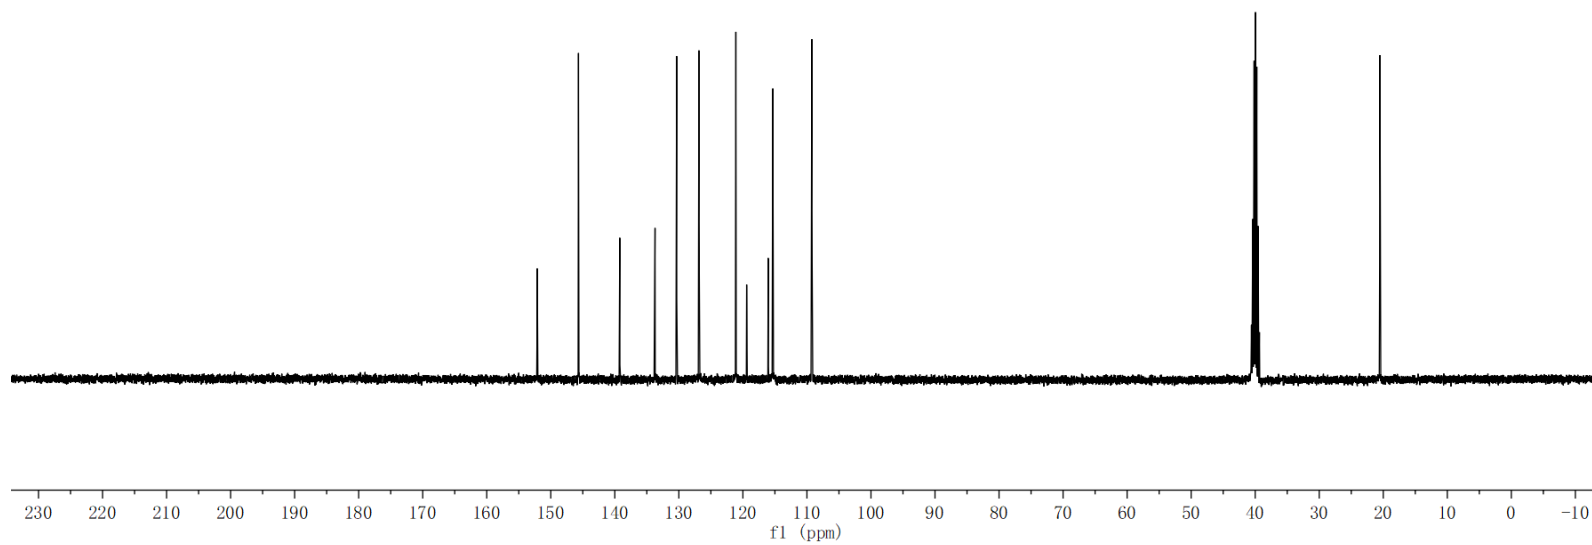

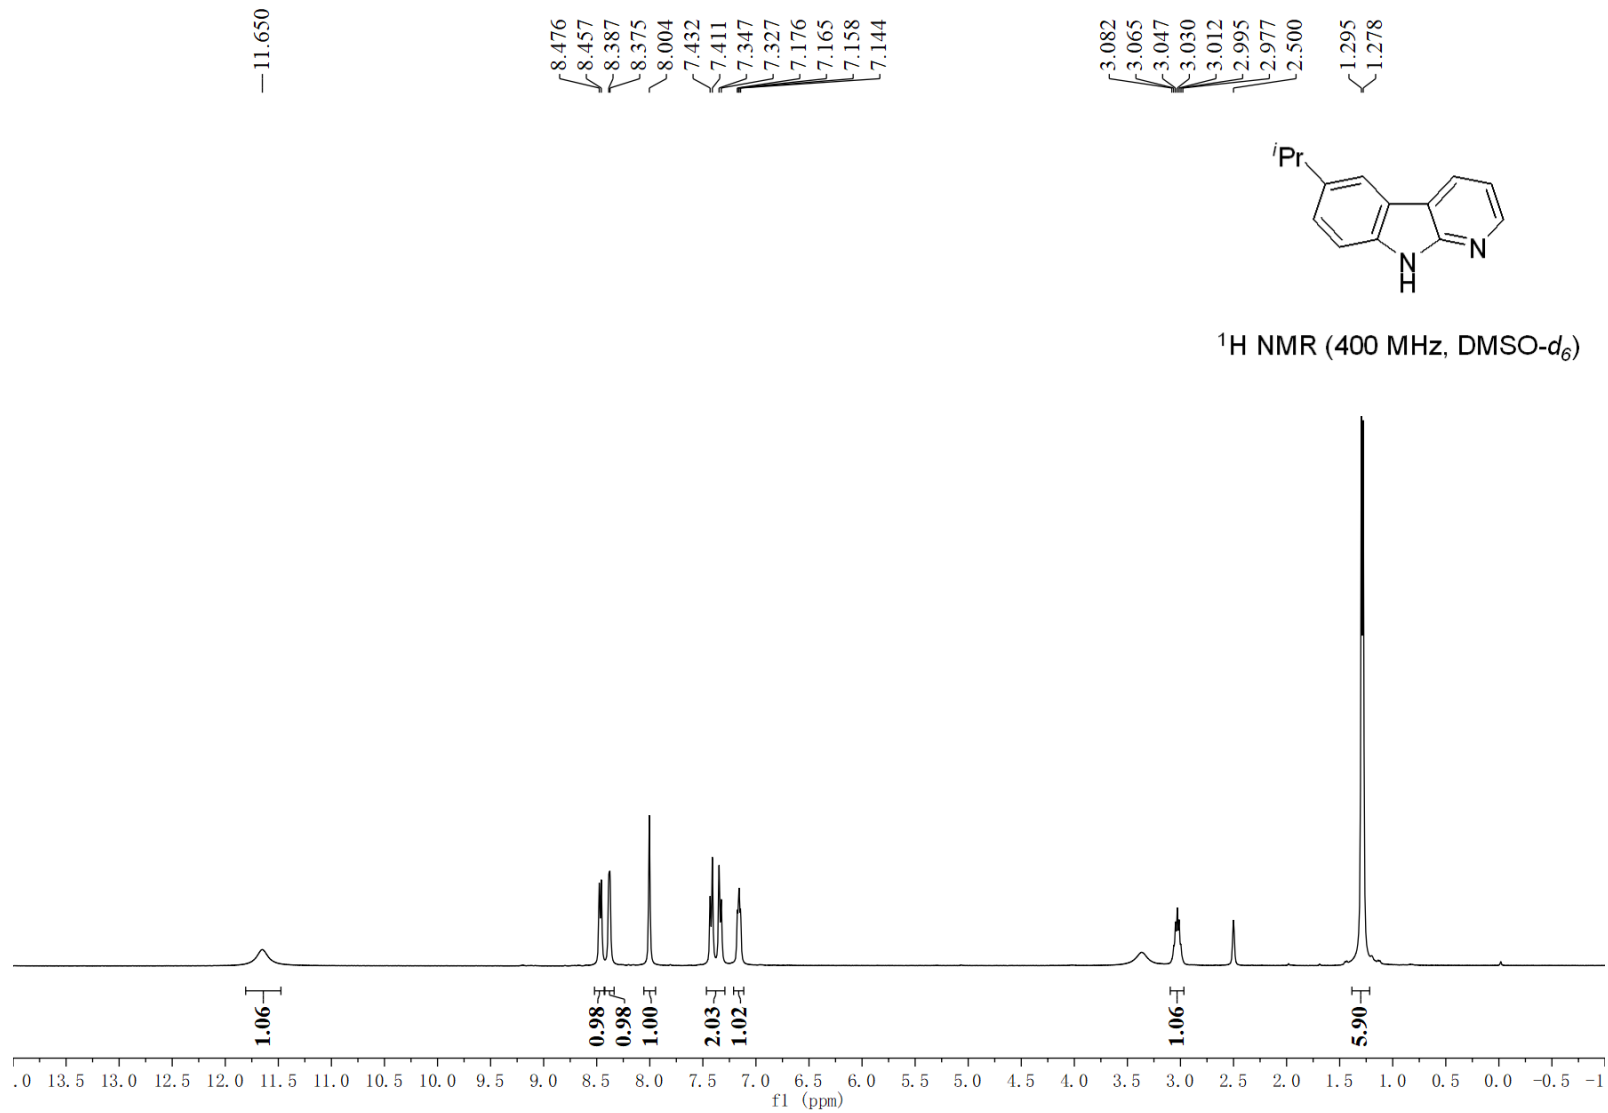

152.623  
146.197  
140.037  
137.685  
128.593  
125.868  
120.808  
118.574  
115.694  
115.114  
111.433

33.984  
24.998

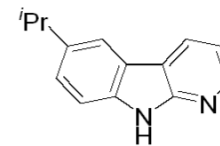

<sup>13</sup>C NMR (100 MHz, DMSO-d<sub>6</sub>)

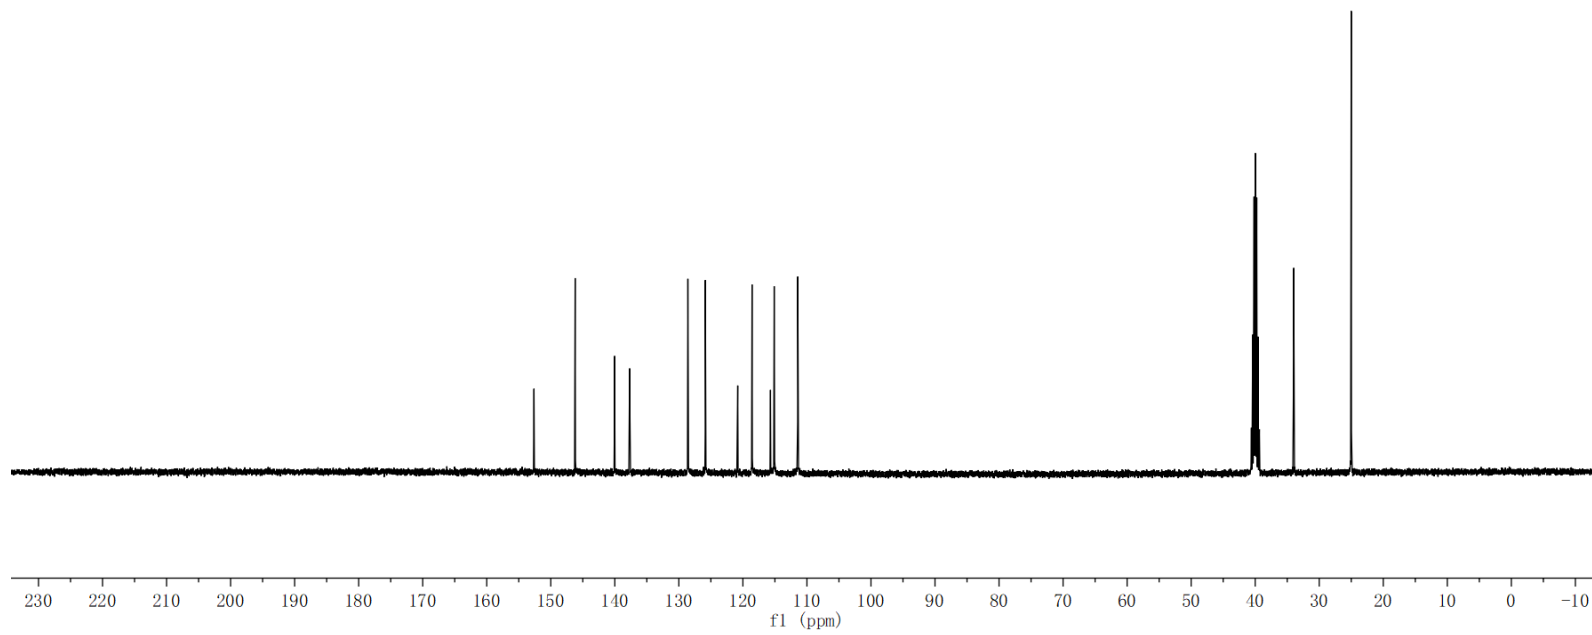

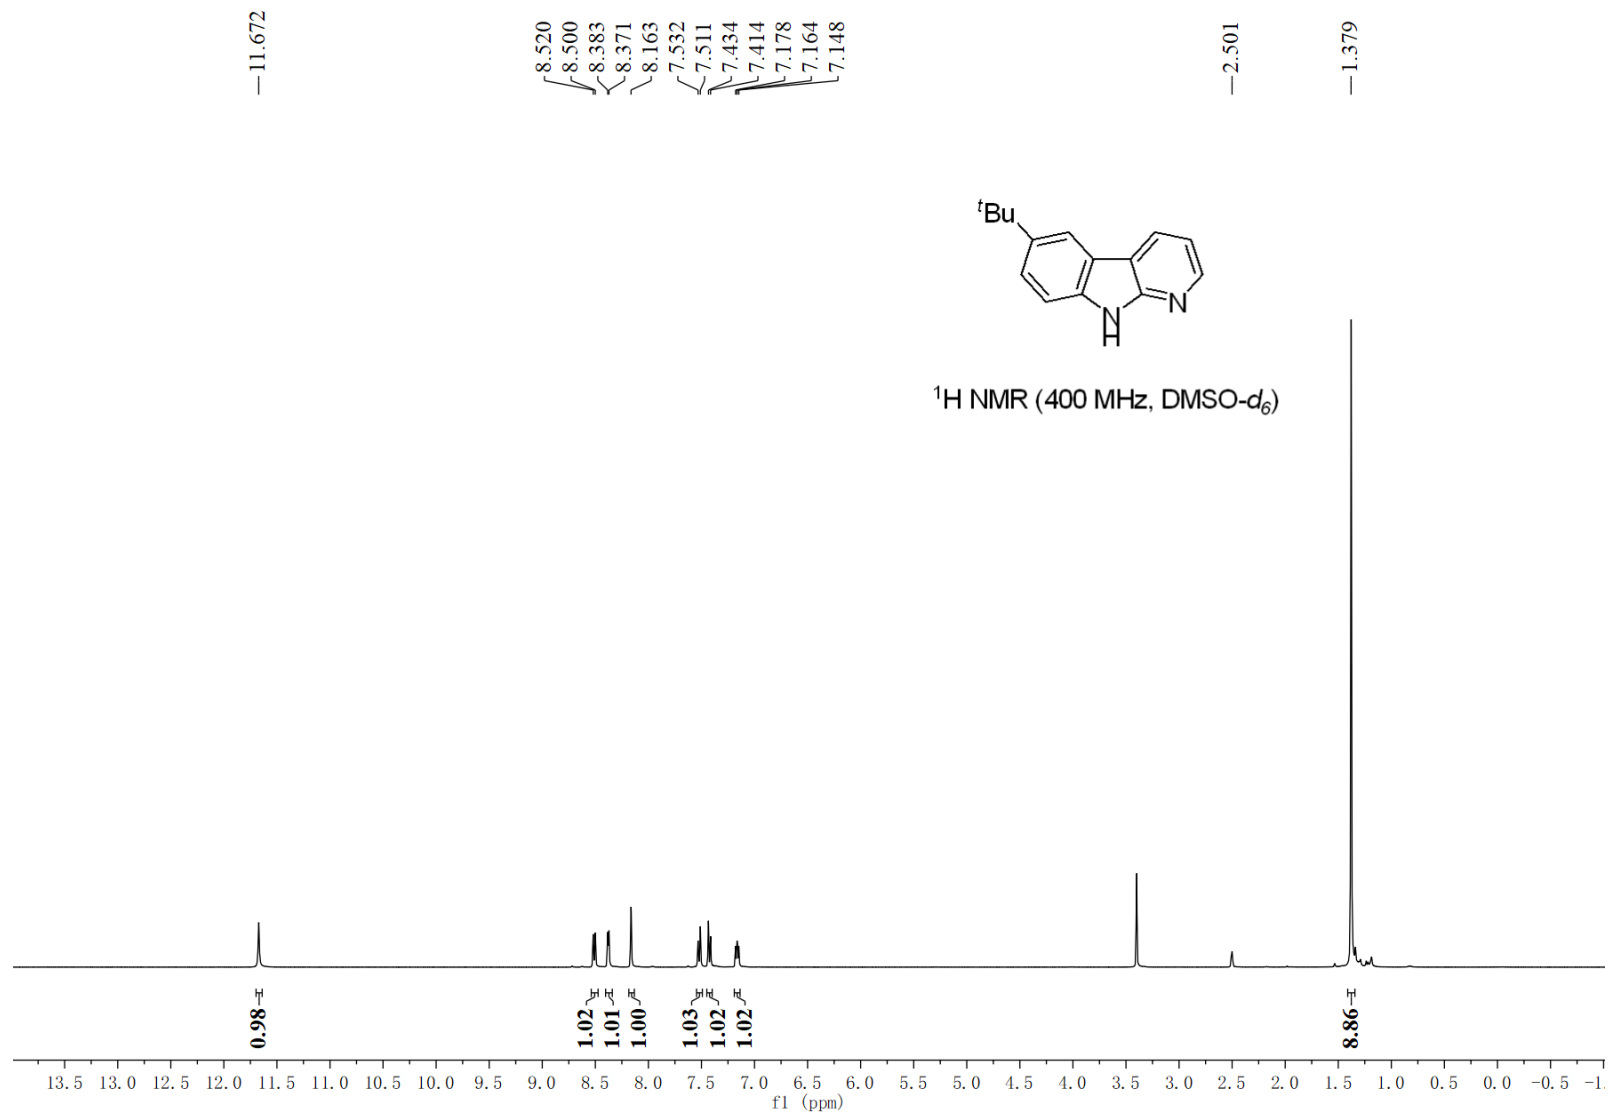

~152.646  
~146.133  
~142.289  
~137.267  
~128.627  
~124.847  
~120.492  
~117.538  
~115.895  
~115.112  
~111.138

~34.868  
~32.206

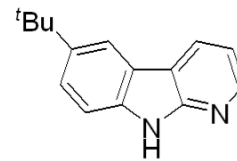

<sup>13</sup>C NMR (100 MHz, DMSO-d<sub>6</sub>)

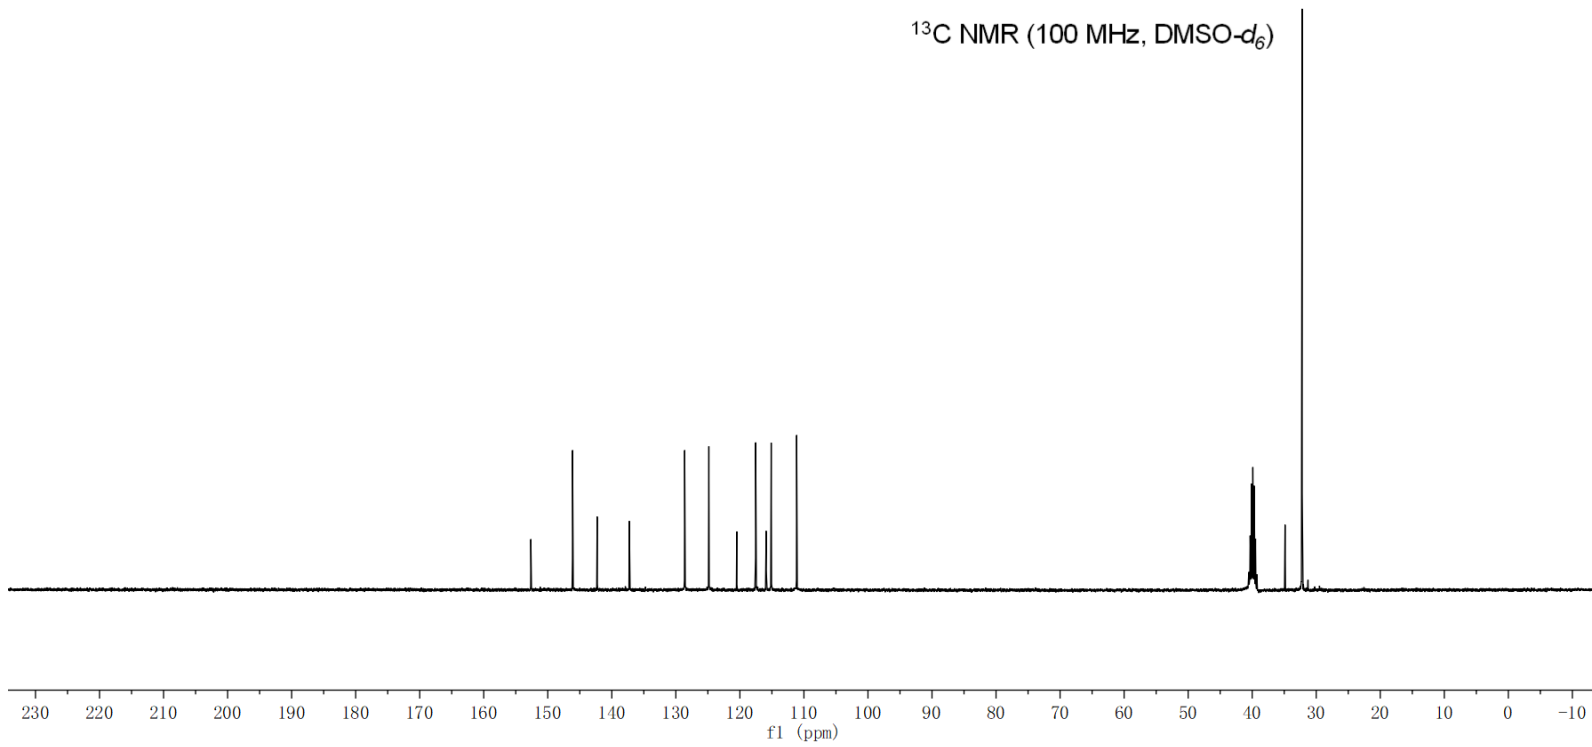

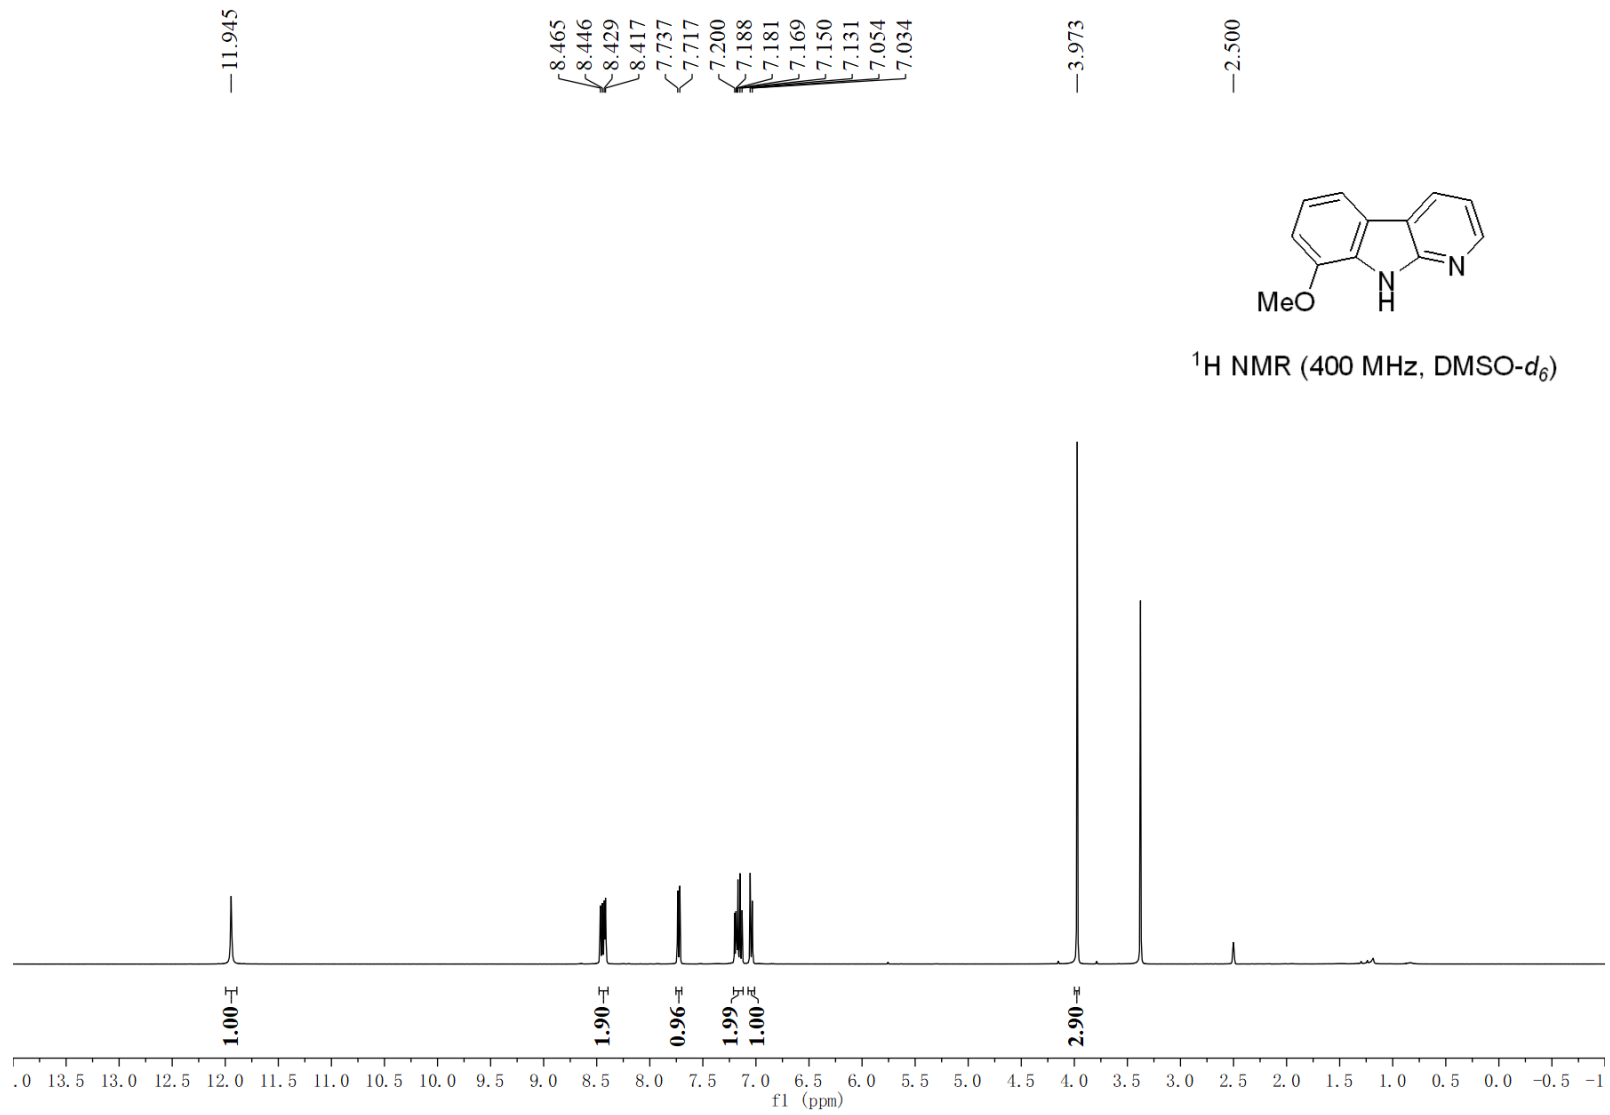

~152.154  
~146.442  
~146.152

~129.190  
~128.944  
~121.884  
~120.410  
~115.823  
~115.398  
~113.791  
~107.829

~55.958

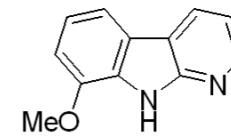

<sup>13</sup>C NMR (100 MHz, DMSO-d<sub>6</sub>)

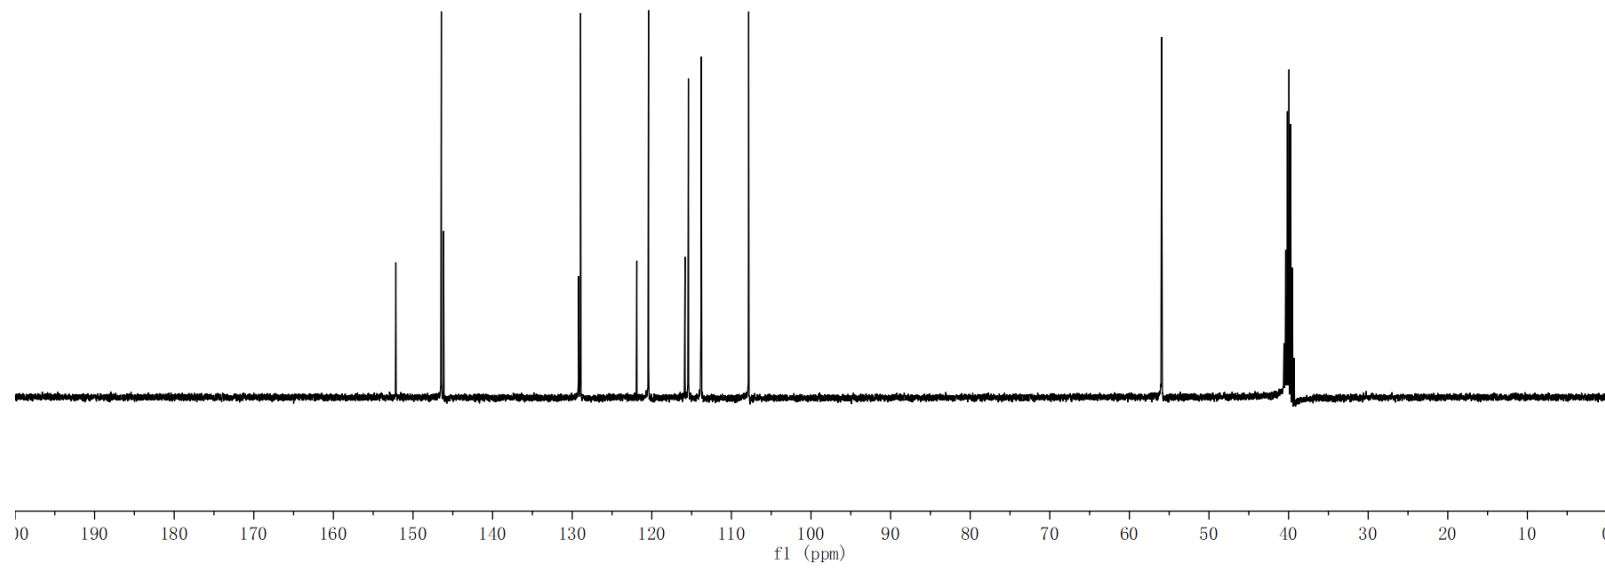

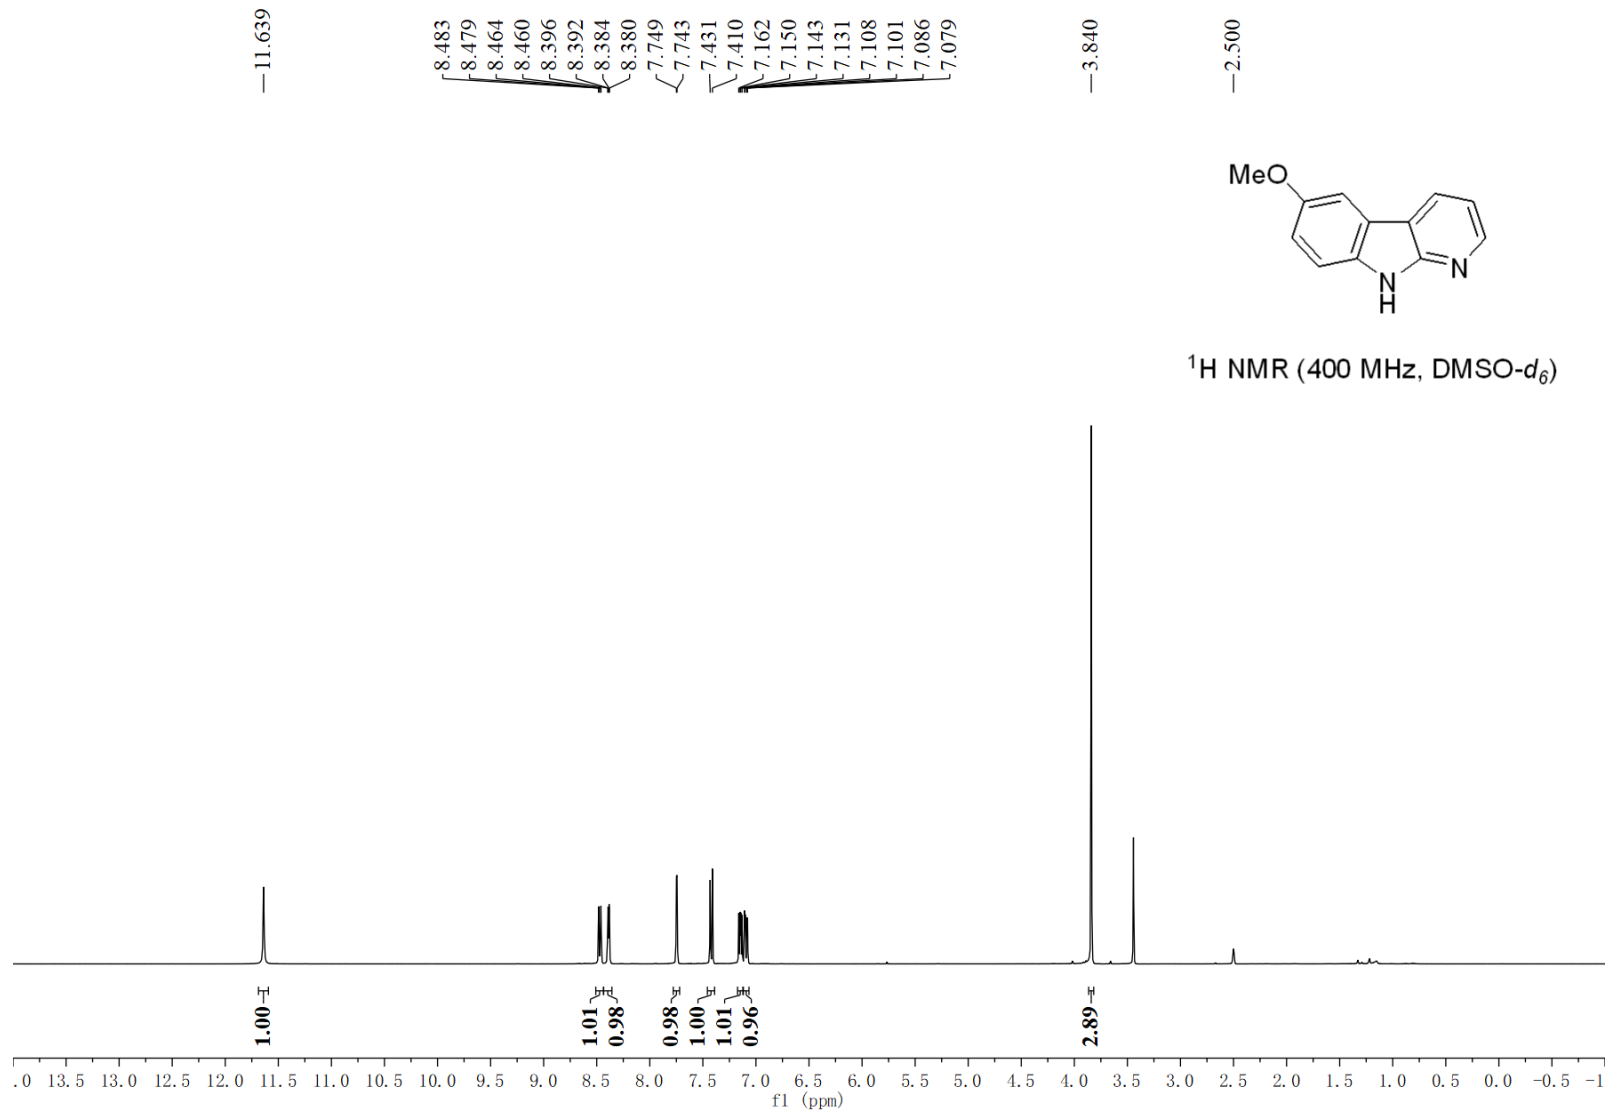



153.876  
152.715  
146.411

133.826  
128.868  
121.169  
116.228  
115.709  
114.894  
112.455  
104.275

55.961

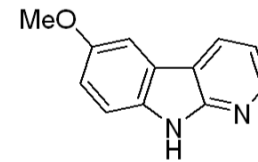

<sup>13</sup>C NMR (100 MHz, DMSO-d<sub>6</sub>)

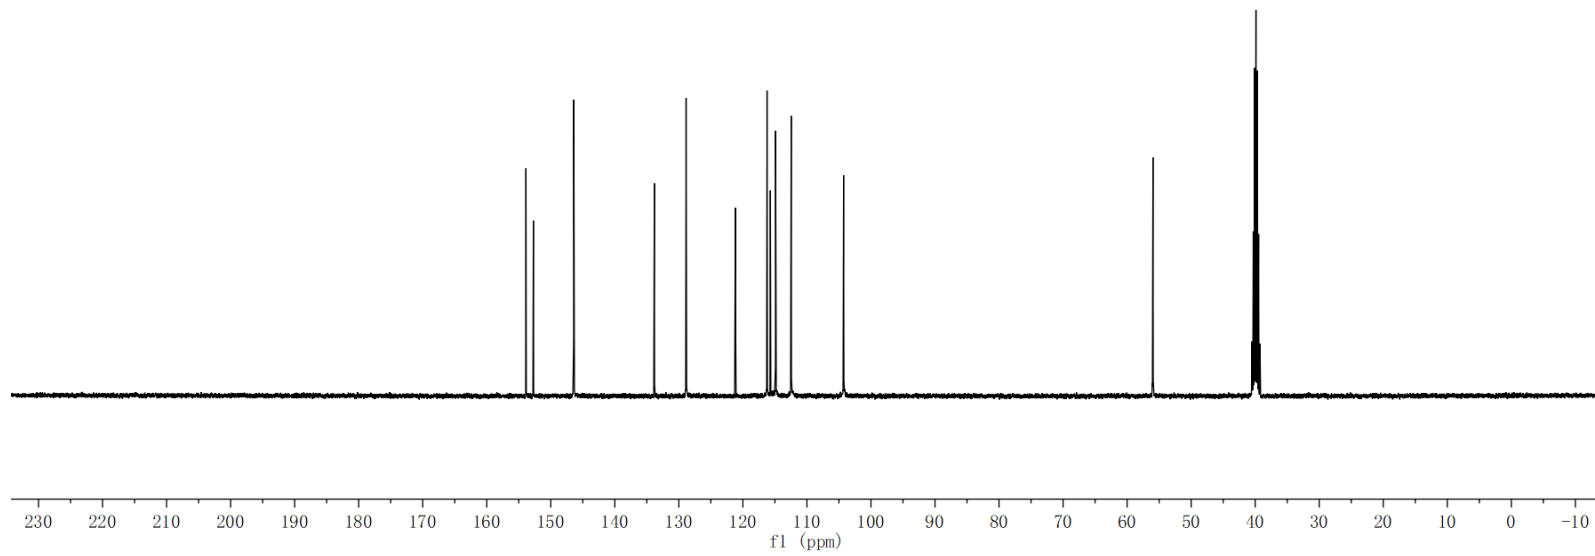

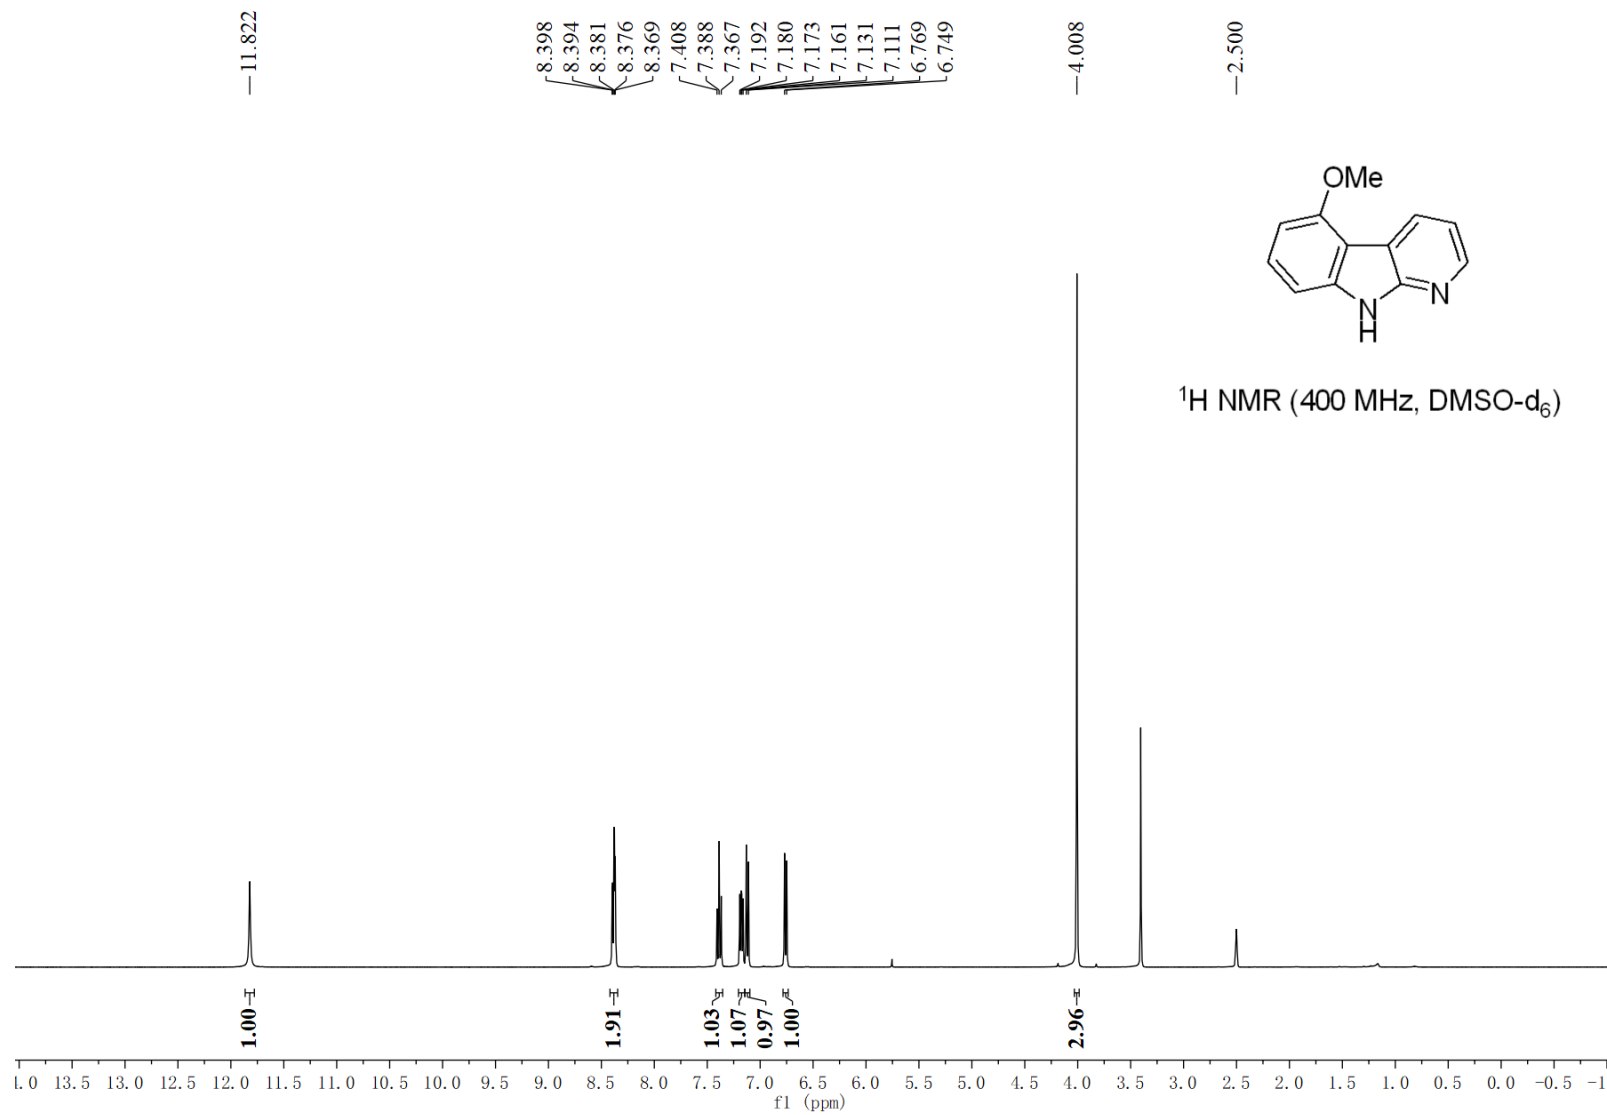

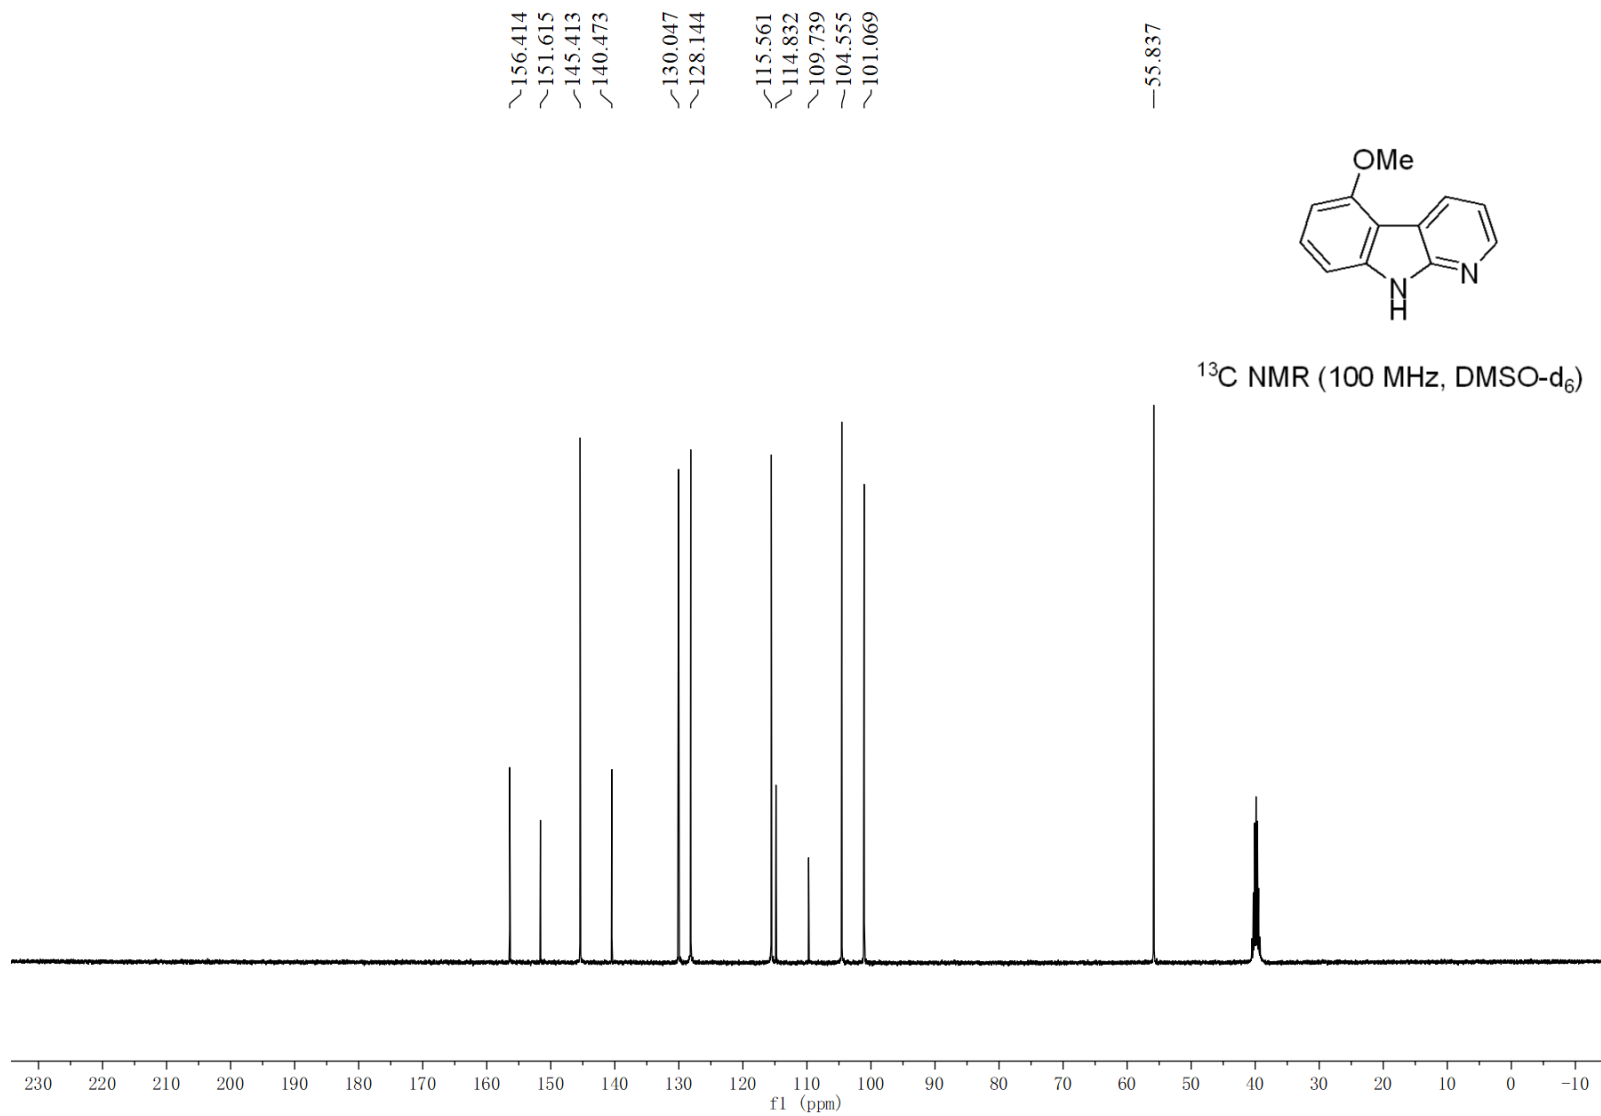

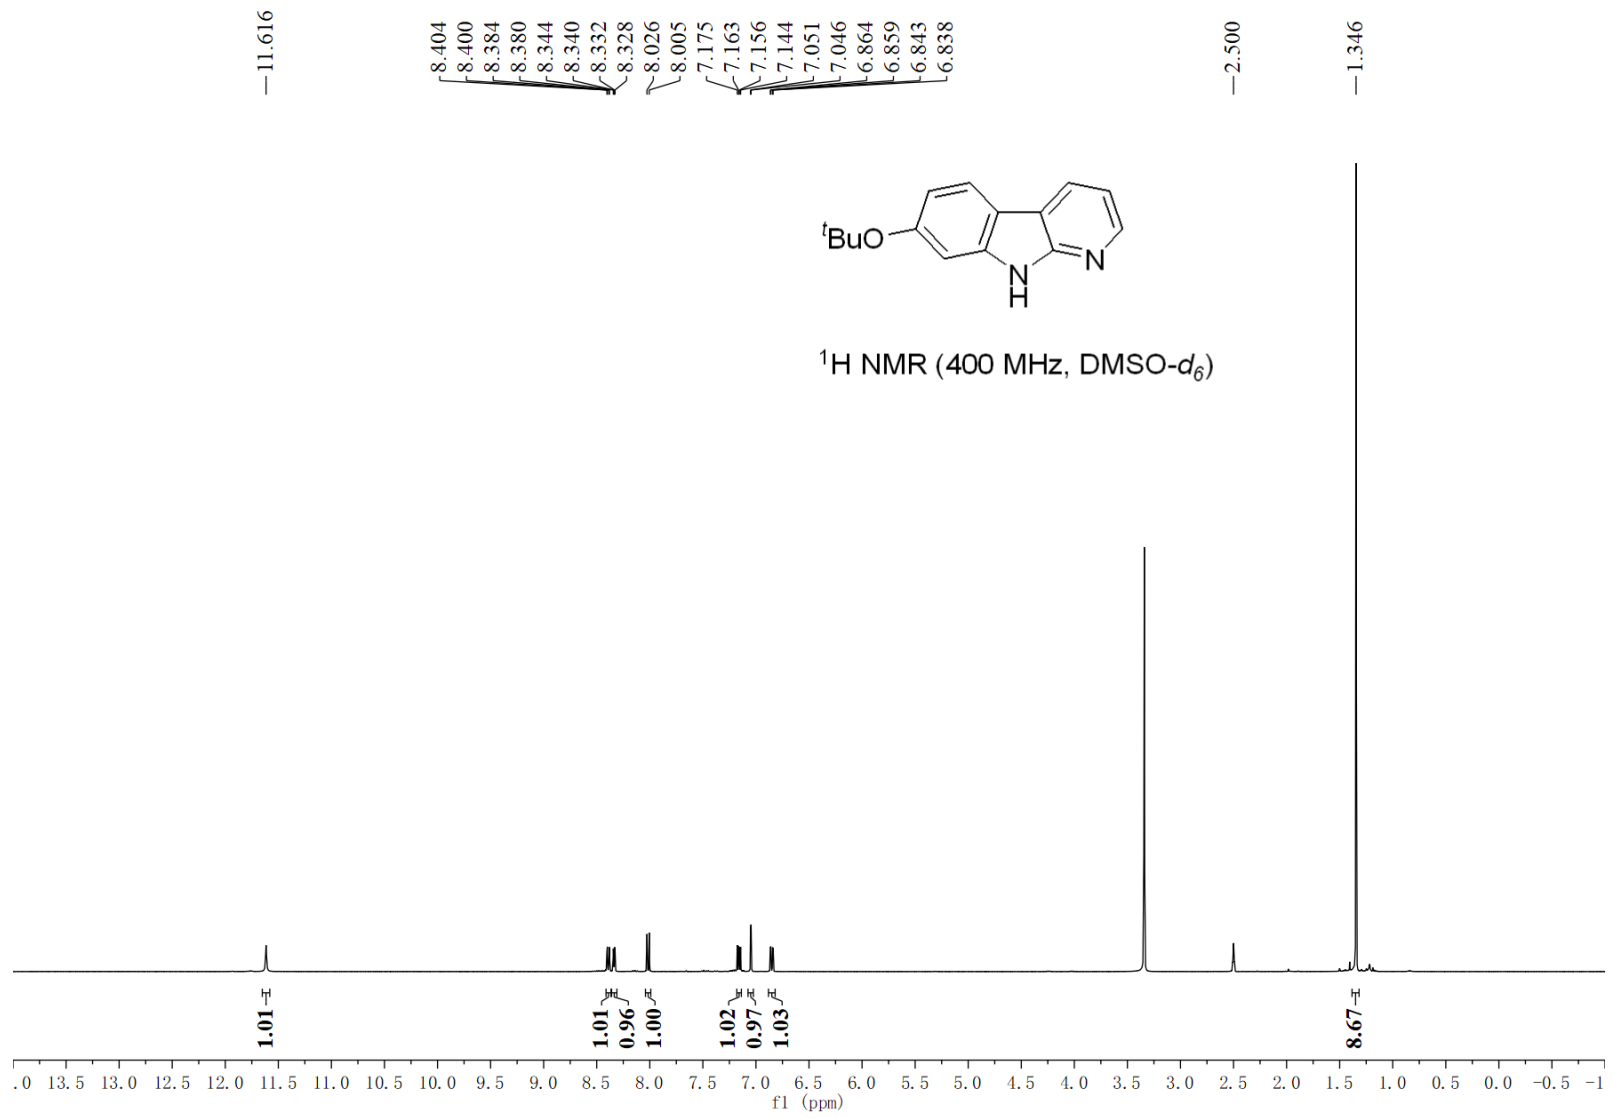

~154.759  
~152.616  
~145.459  
~139.980  
/128.042  
/121.714  
/117.059  
/116.611  
/115.697  
/115.387  
—106.297

—78.748

—29.132

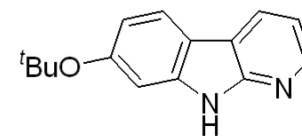

<sup>13</sup>C NMR (100 MHz, DMSO-d<sub>6</sub>)

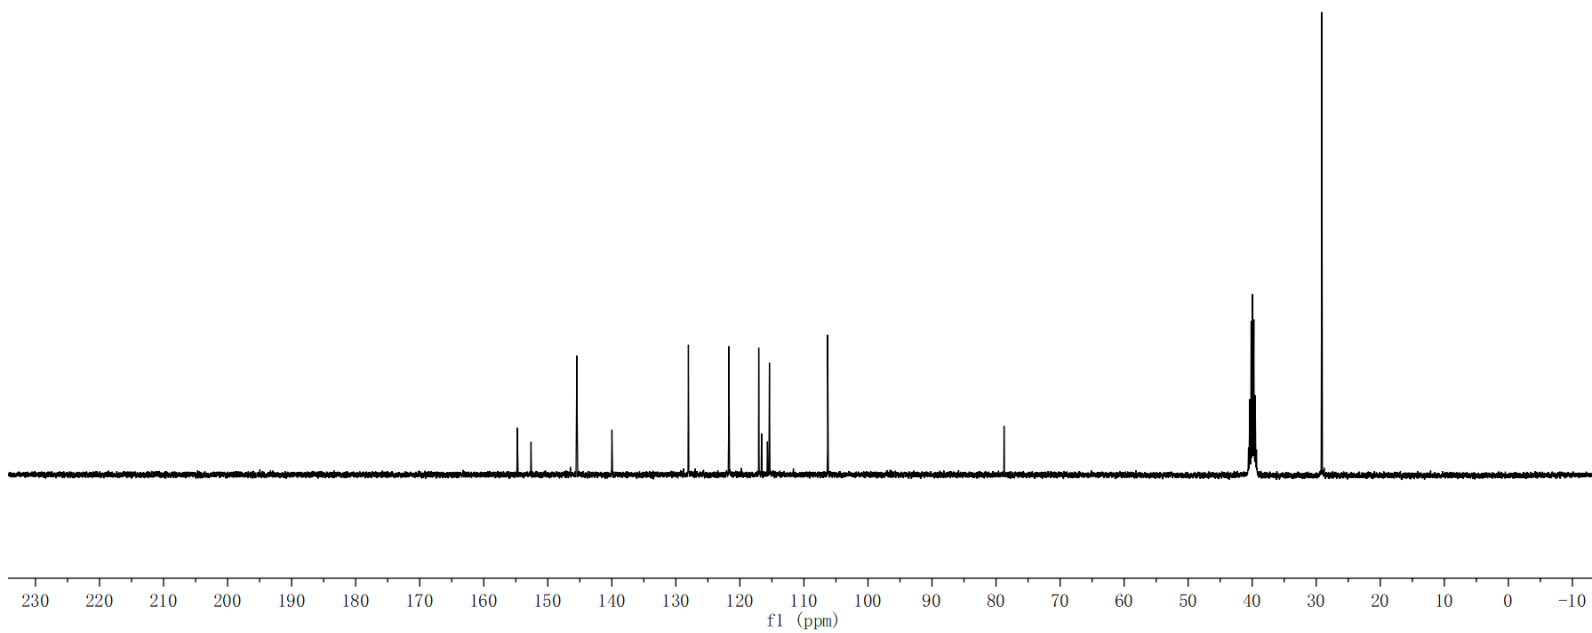

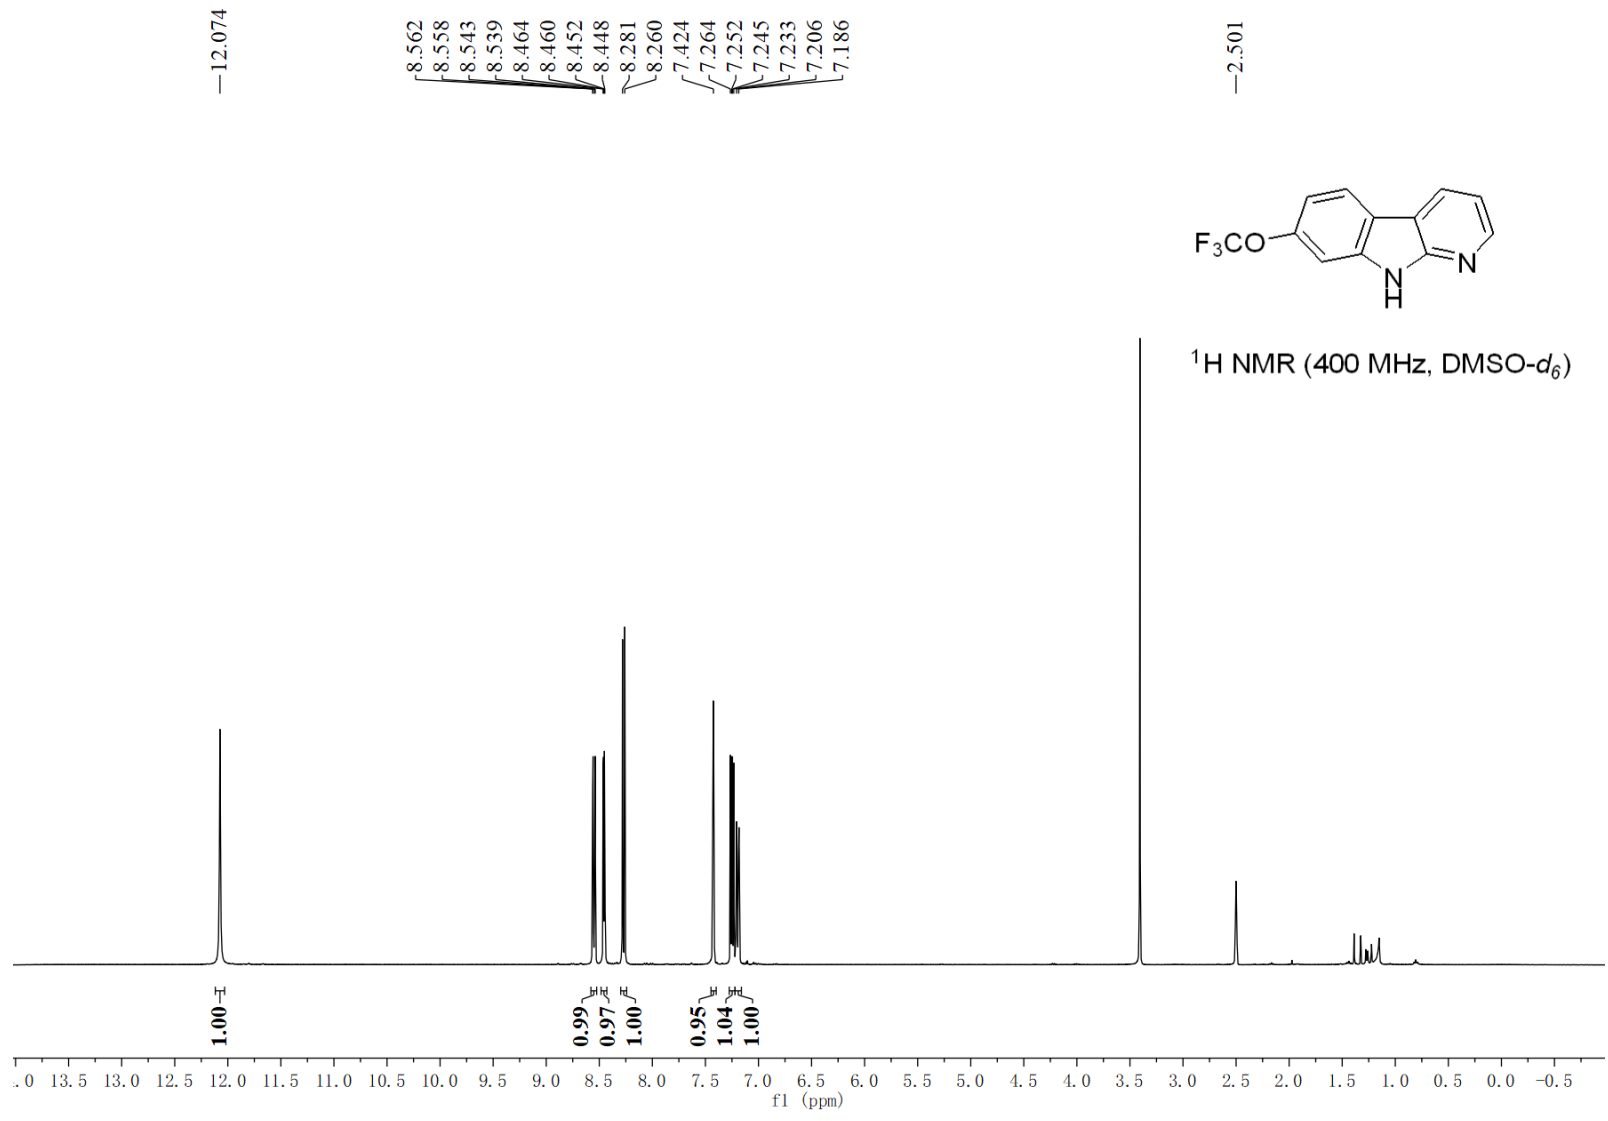

152.915  
147.419  
147.401  
147.014  
139.464  
129.327  
123.127  
119.923  
116.017  
114.925  
113.020  
104.185

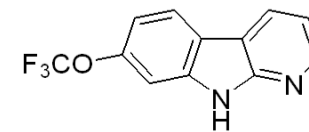

$^{13}\text{C}$  NMR (100 MHz,  $\text{DMSO-}d_6$ )

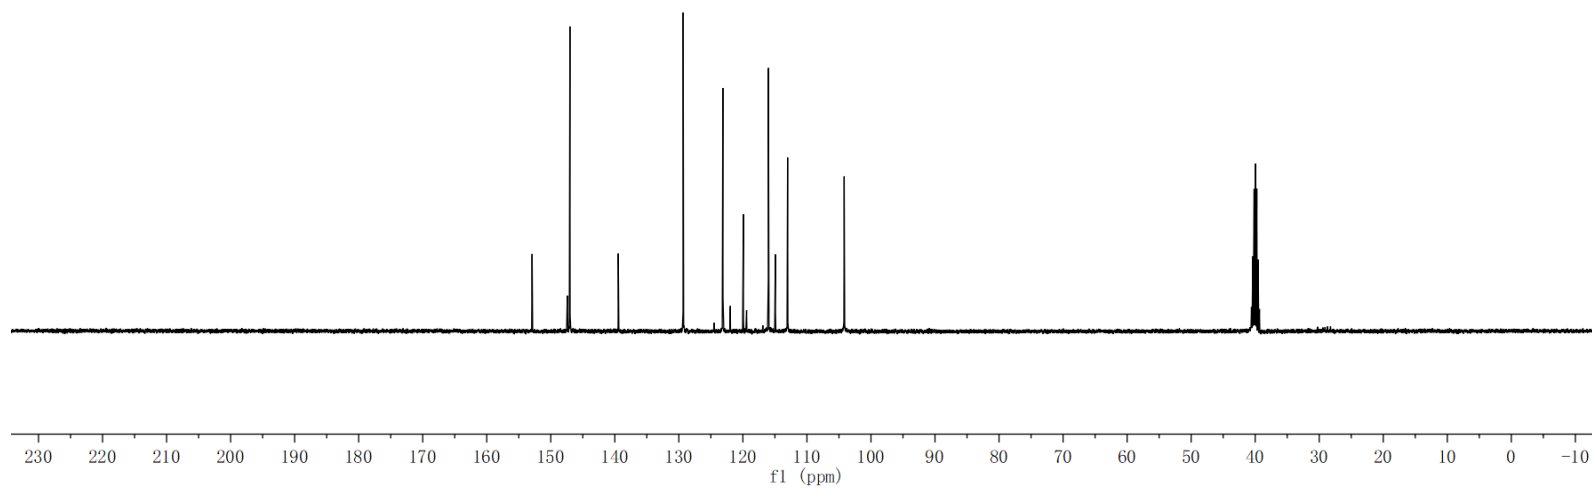

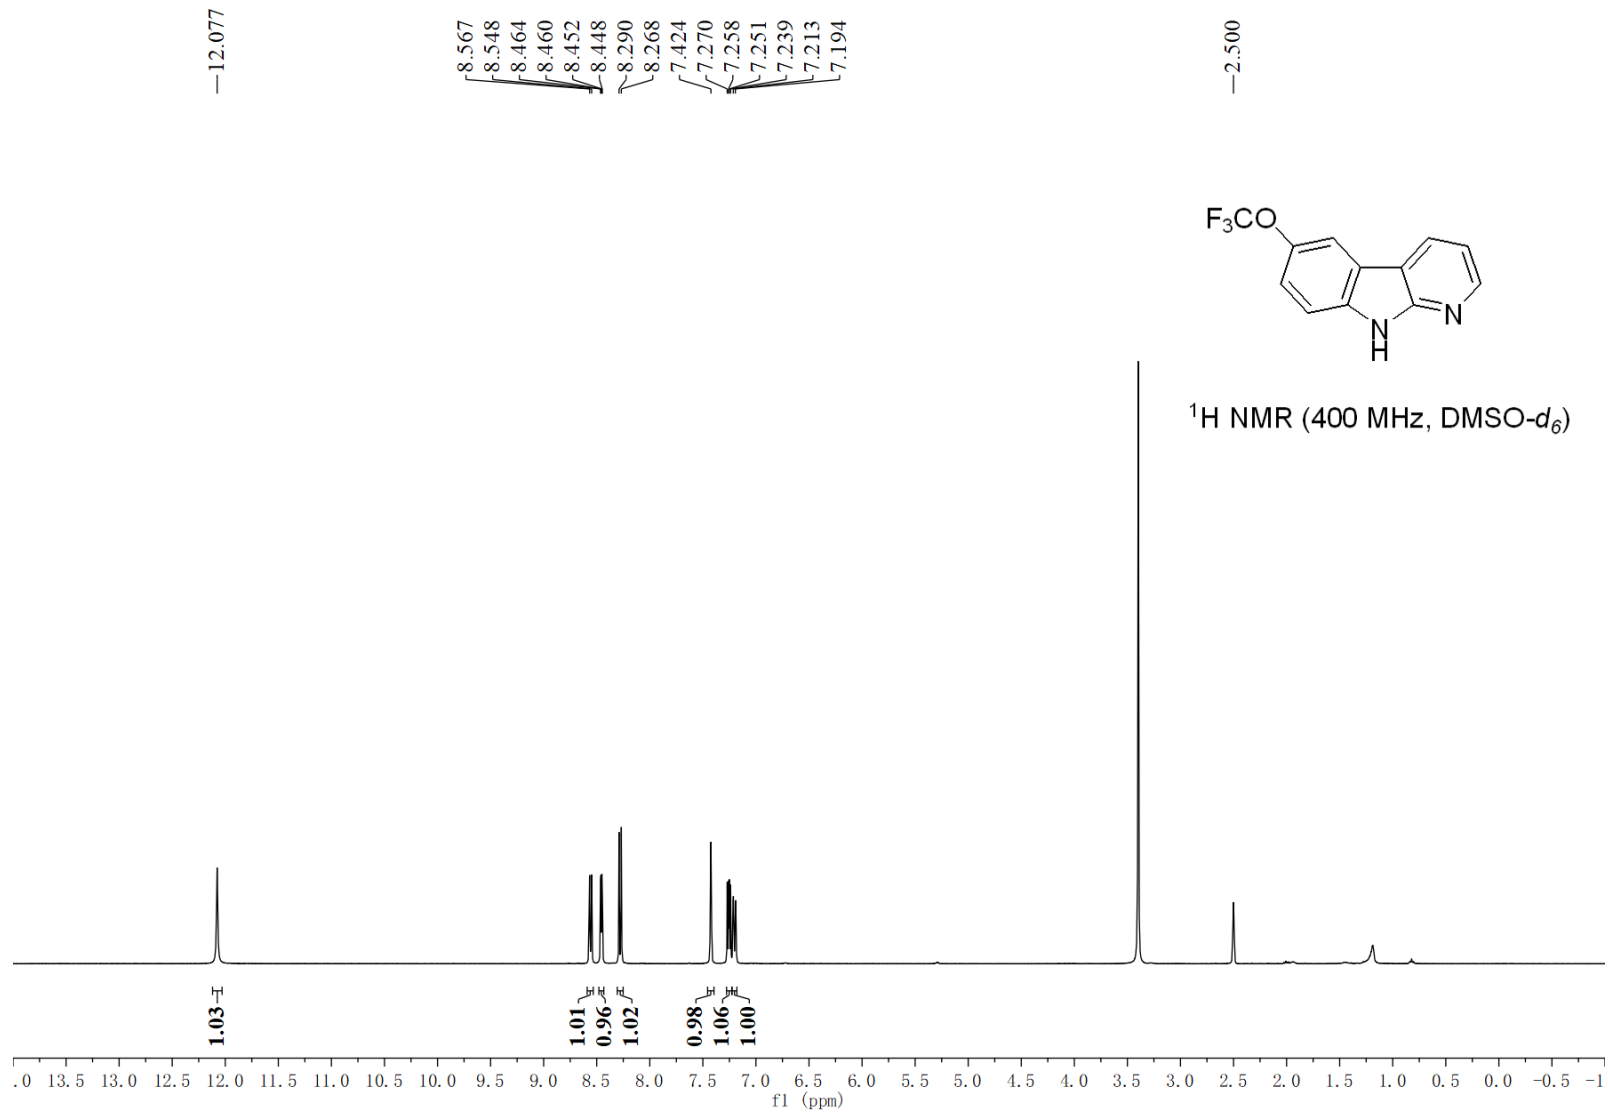



152.876  
147.375  
147.355  
147.336  
147.039  
139.420  
129.404  
123.187  
121.951  
119.916  
116.049  
114.905  
113.087  
104.226

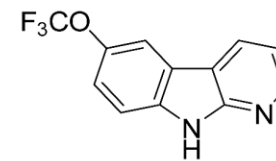

<sup>13</sup>C NMR (100 MHz, DMSO-*d*<sub>6</sub>)

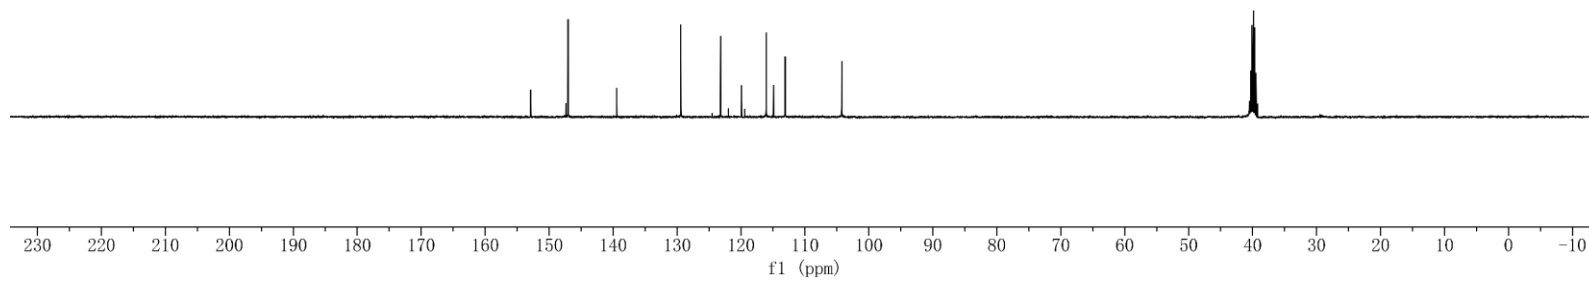

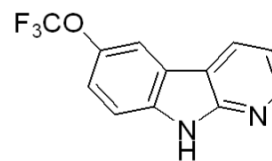

<sup>19</sup>F NMR (301 MHz, DMSO-*d*<sub>6</sub>)

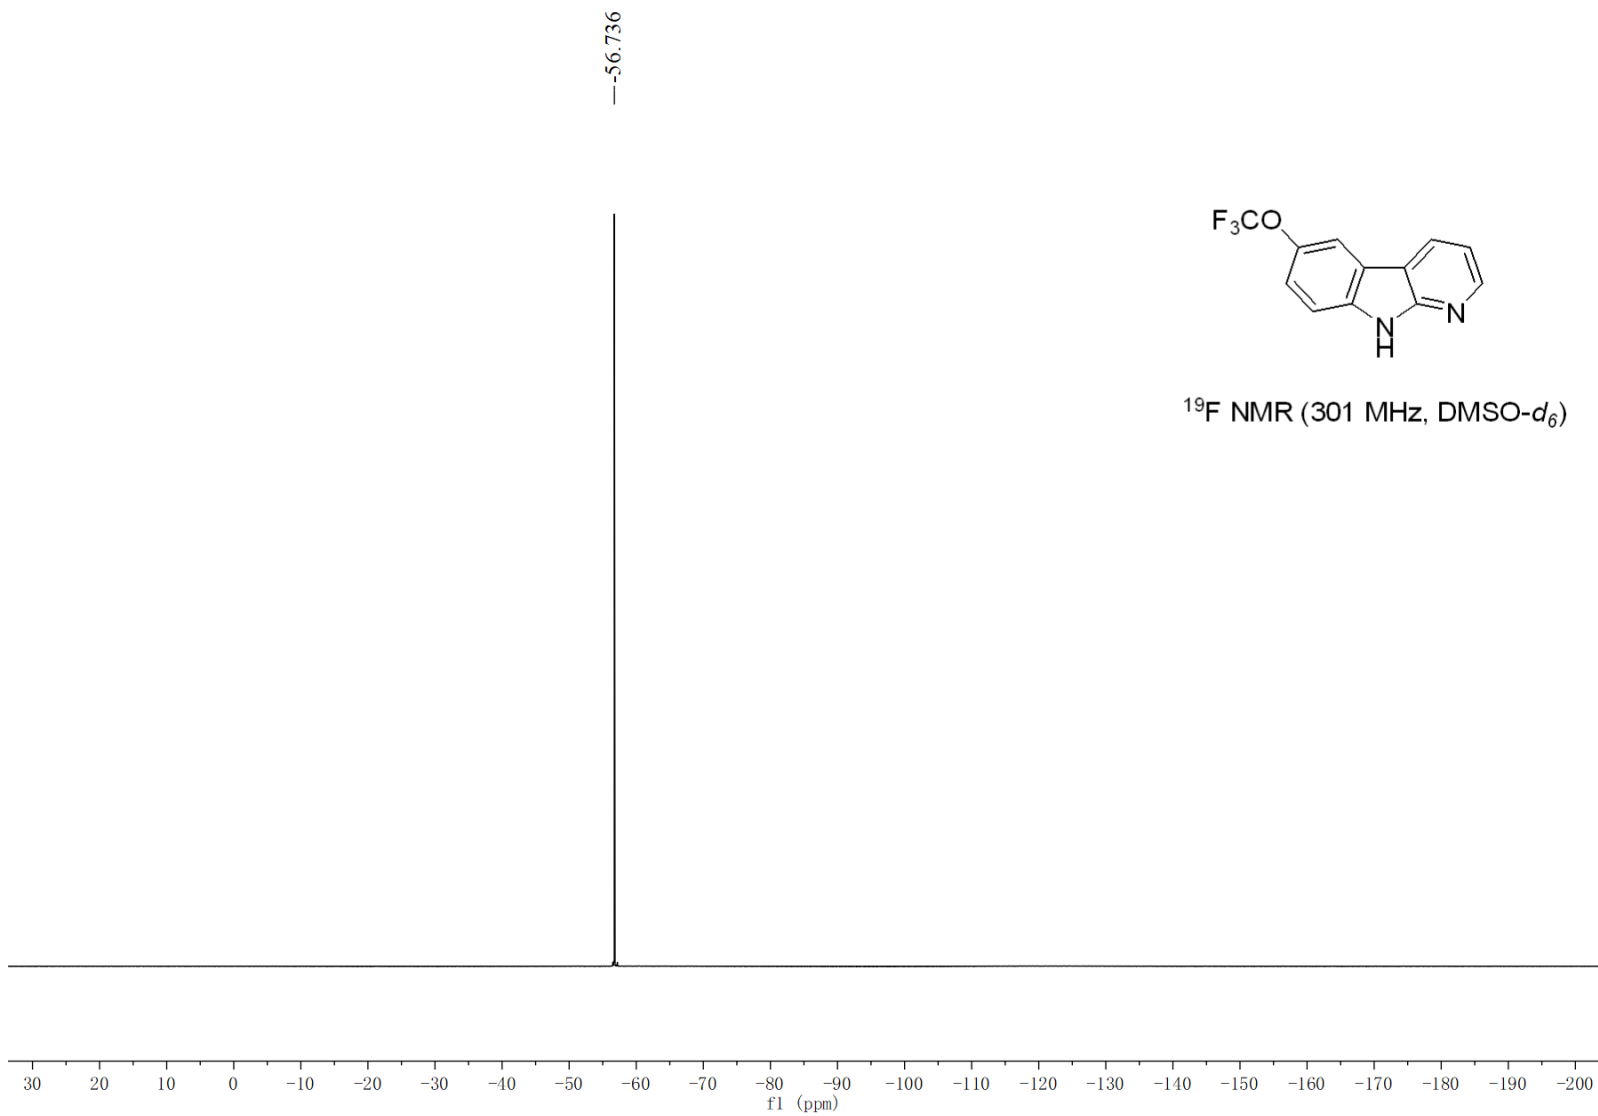

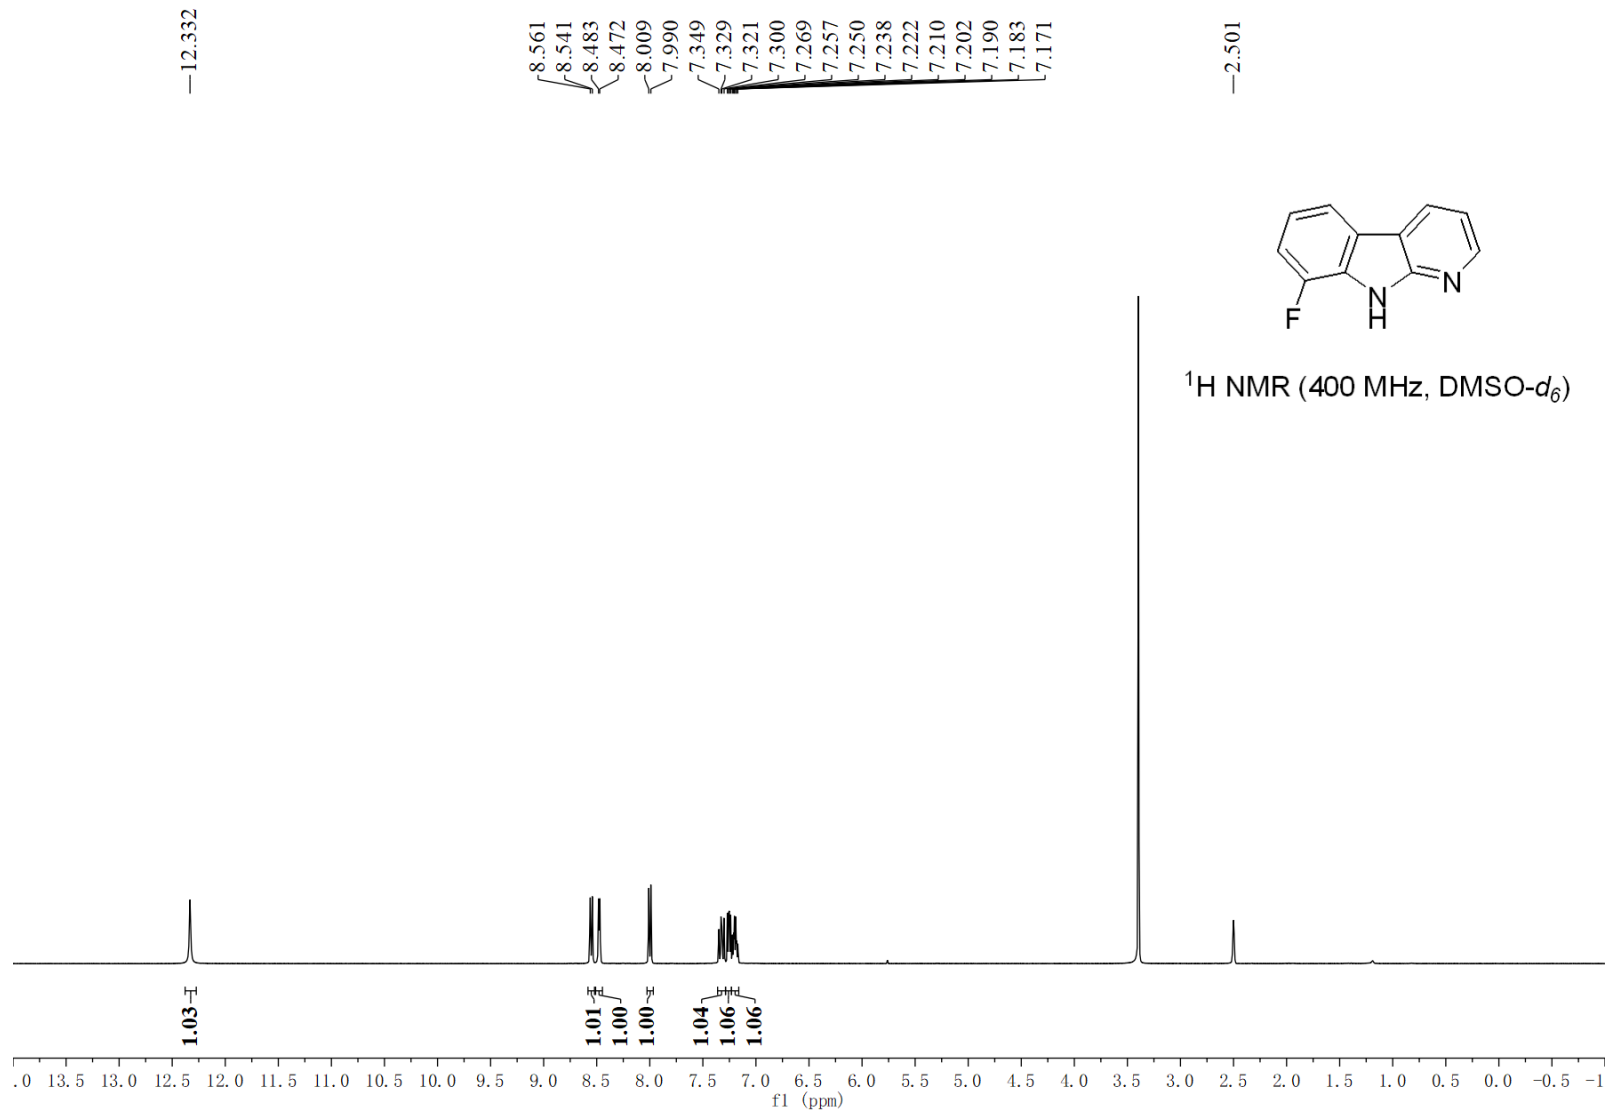

152.525  
150.147  
147.730  
147.419  
129.555  
126.988  
126.857  
124.459  
124.402  
120.281  
120.222  
117.722  
117.687  
116.001  
115.477  
115.447  
112.336  
112.174

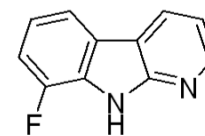

<sup>13</sup>C NMR (100 MHz, DMSO-d<sub>6</sub>)

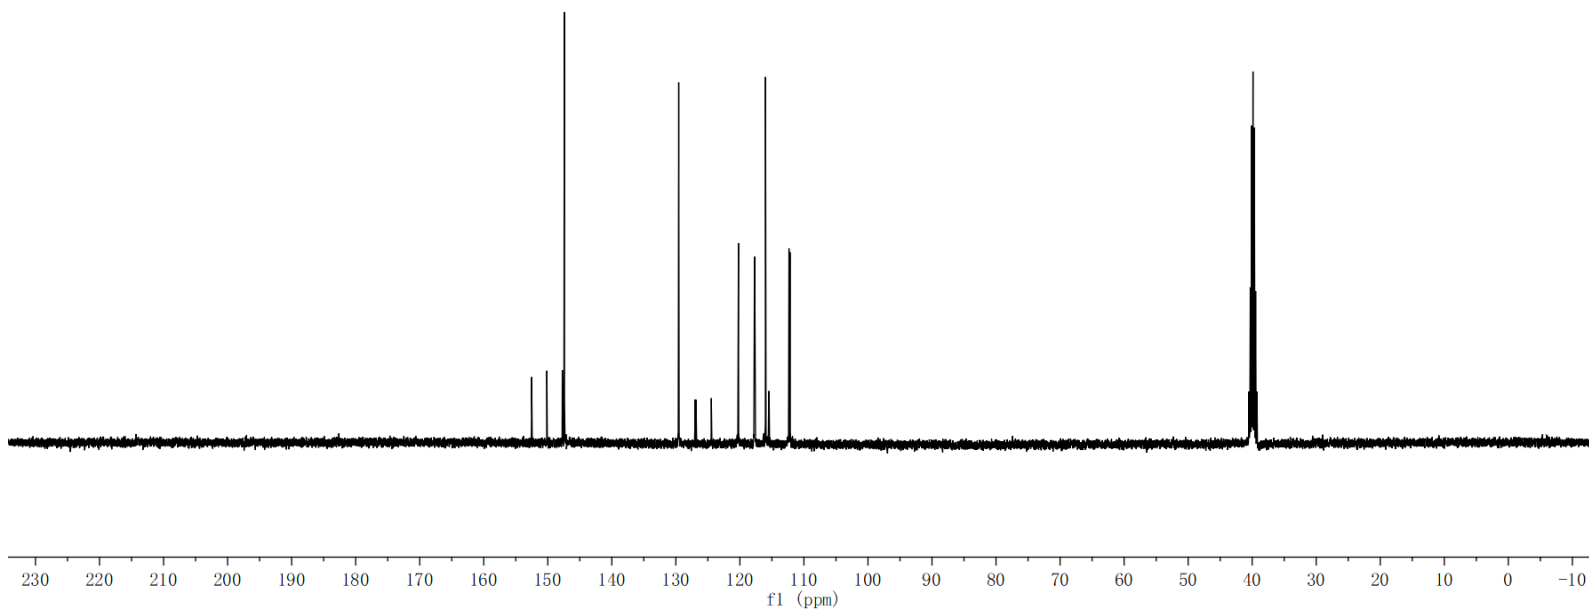

132.276  
132.288  
132.306  
132.319

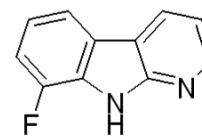

<sup>19</sup>F NMR (301 MHz, DMSO-d<sub>6</sub>)

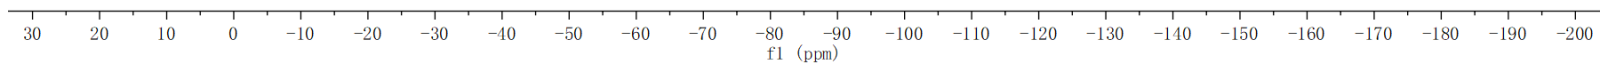

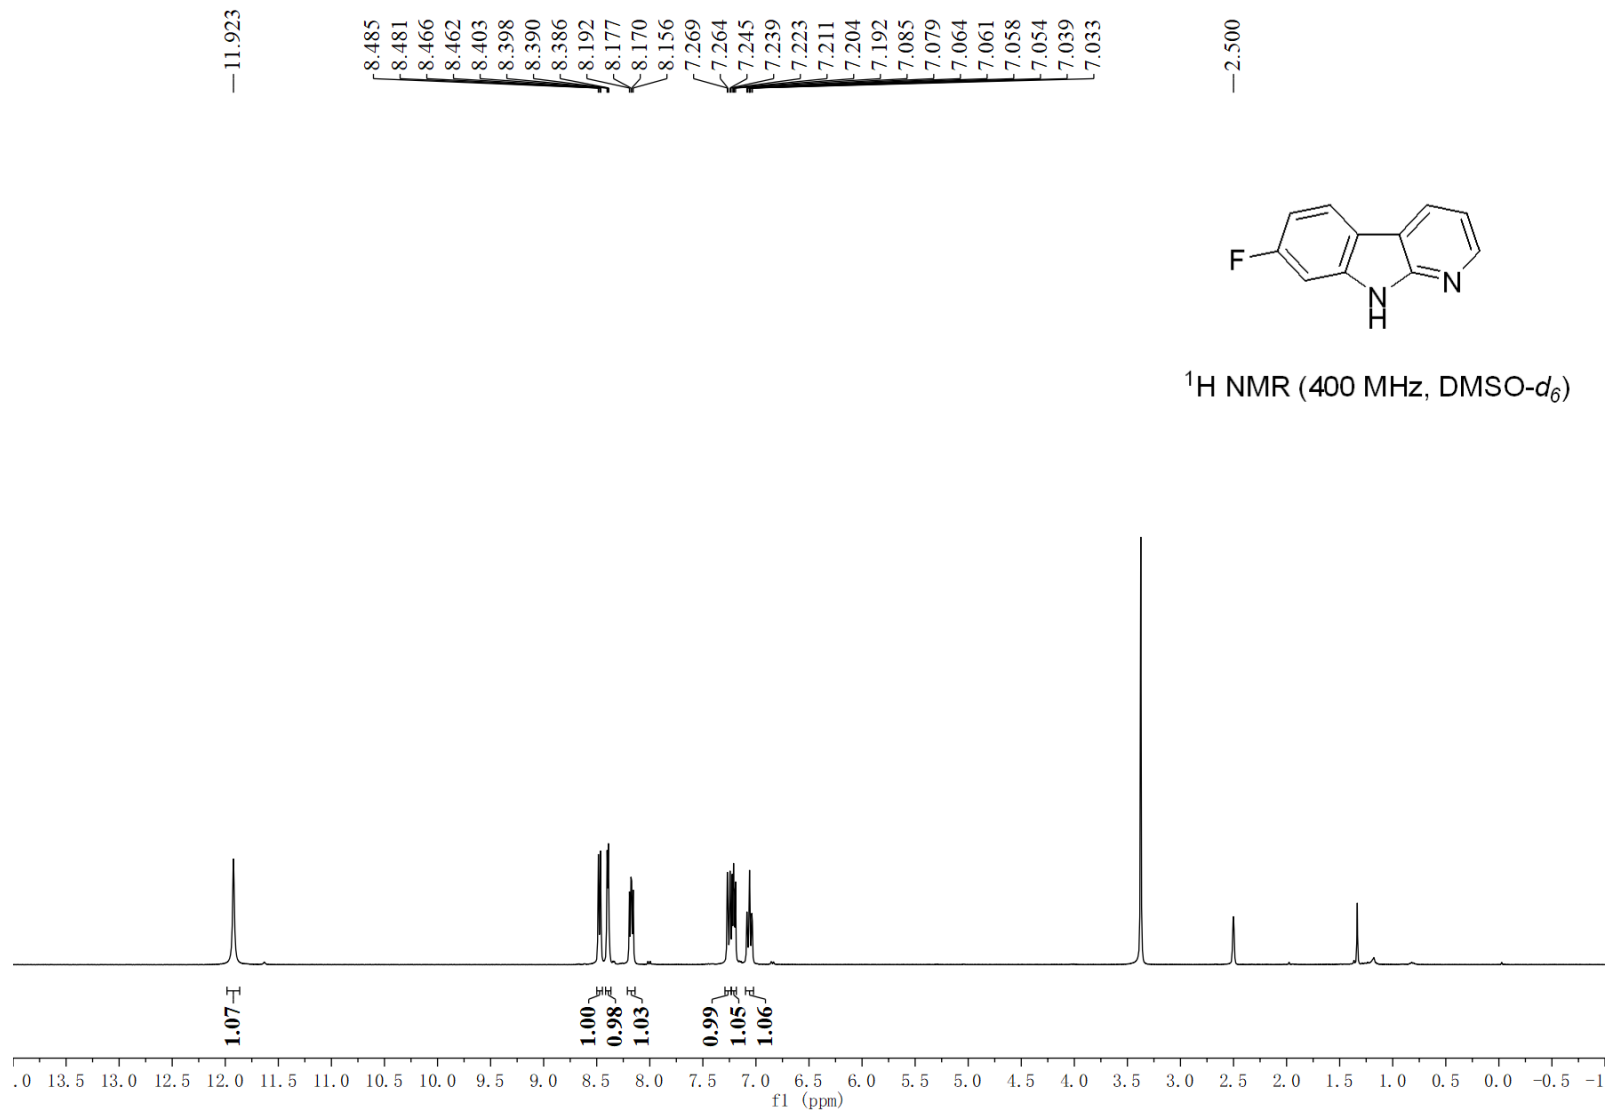

163.12  
160.73  
152.84  
152.82  
146.09  
140.06  
139.93  
128.63  
123.24  
123.13  
117.56  
117.54  
115.80  
115.33  
108.00  
107.76  
98.29  
98.03

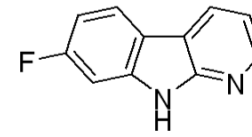

<sup>13</sup>C NMR (100 MHz, DMSO-d<sub>6</sub>)

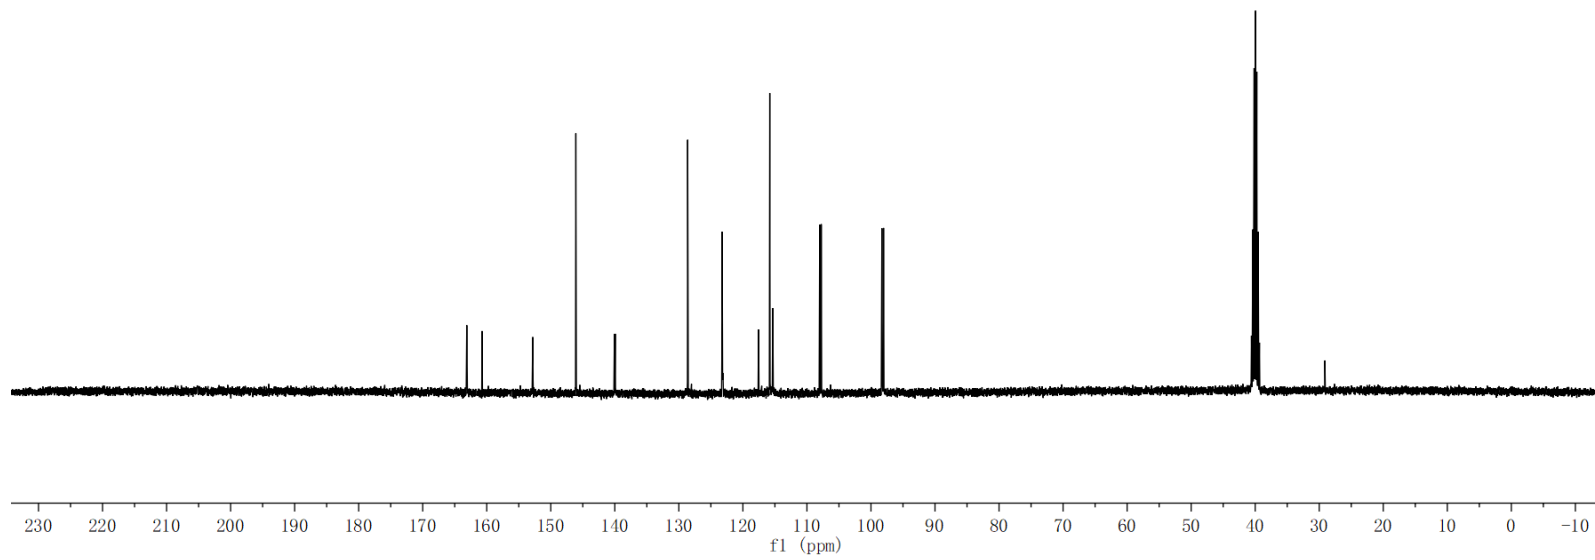

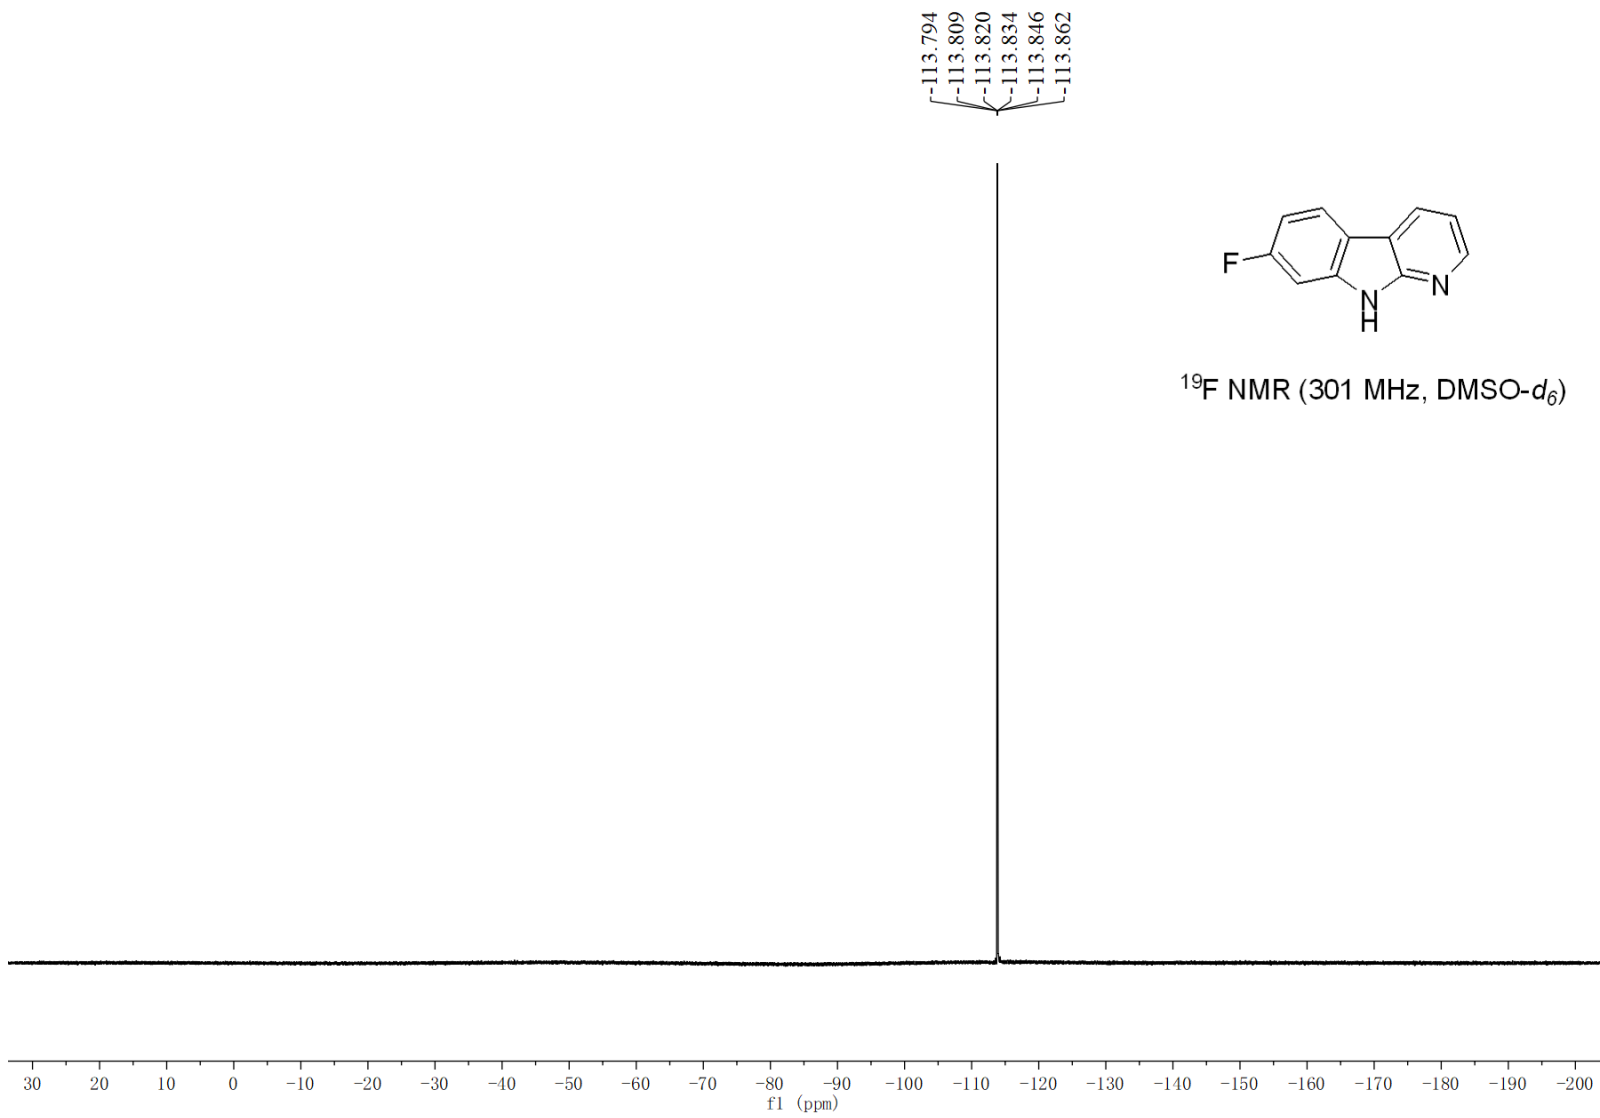



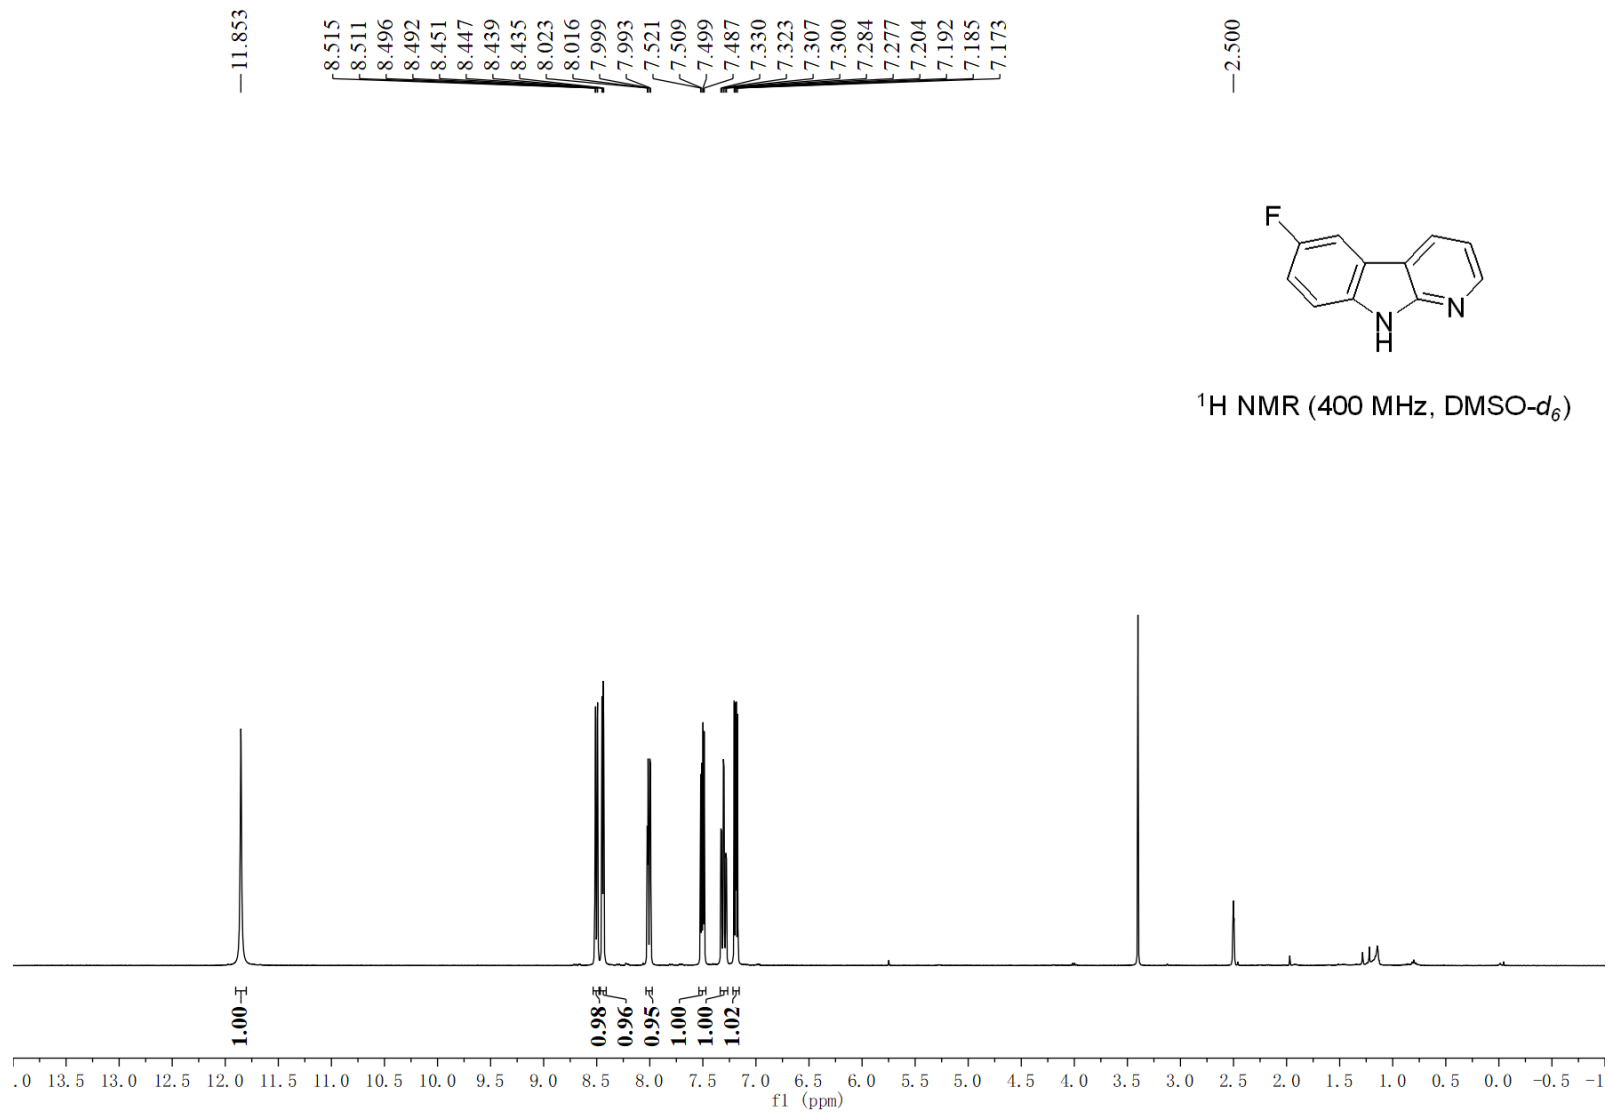

~158.319  
~155.999  
~153.040  
~147.222  
135.652  
129.447  
121.332  
121.232  
115.336  
114.859  
114.608  
112.743  
112.653  
107.387  
107.149

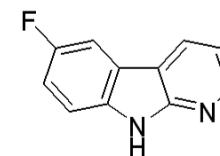

<sup>13</sup>C NMR (100 MHz, DMSO-d<sub>6</sub>)

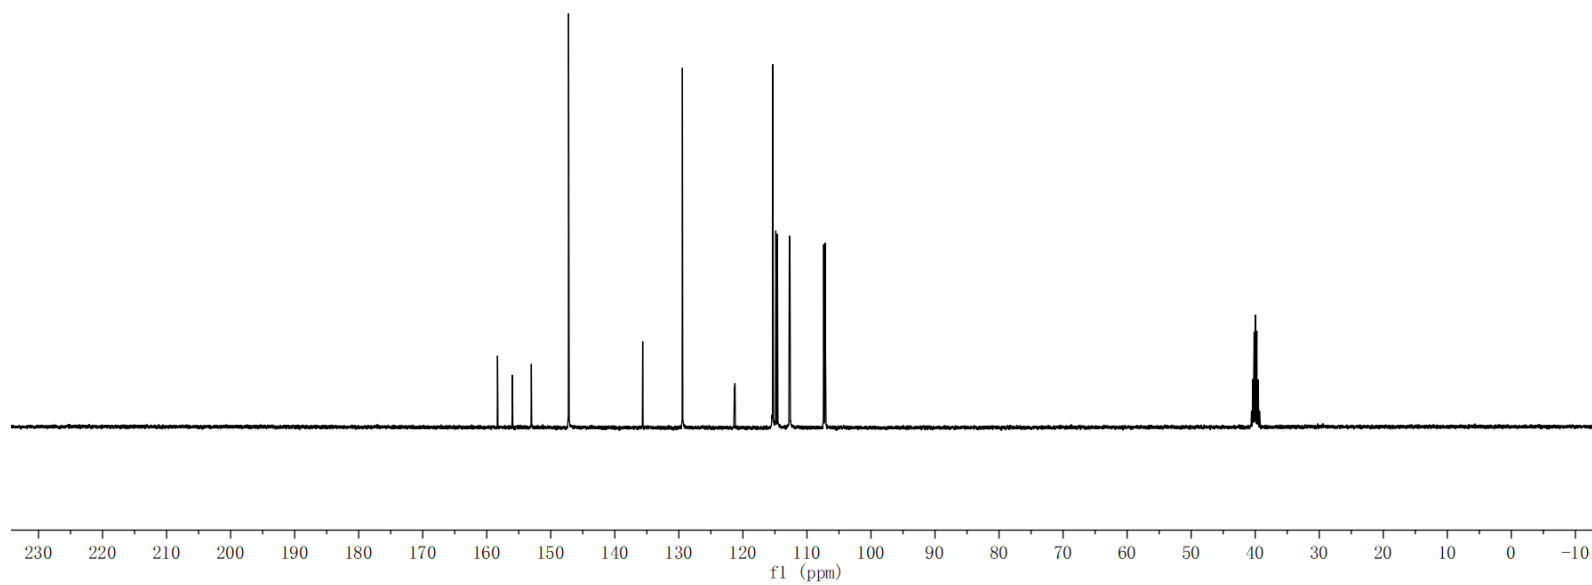

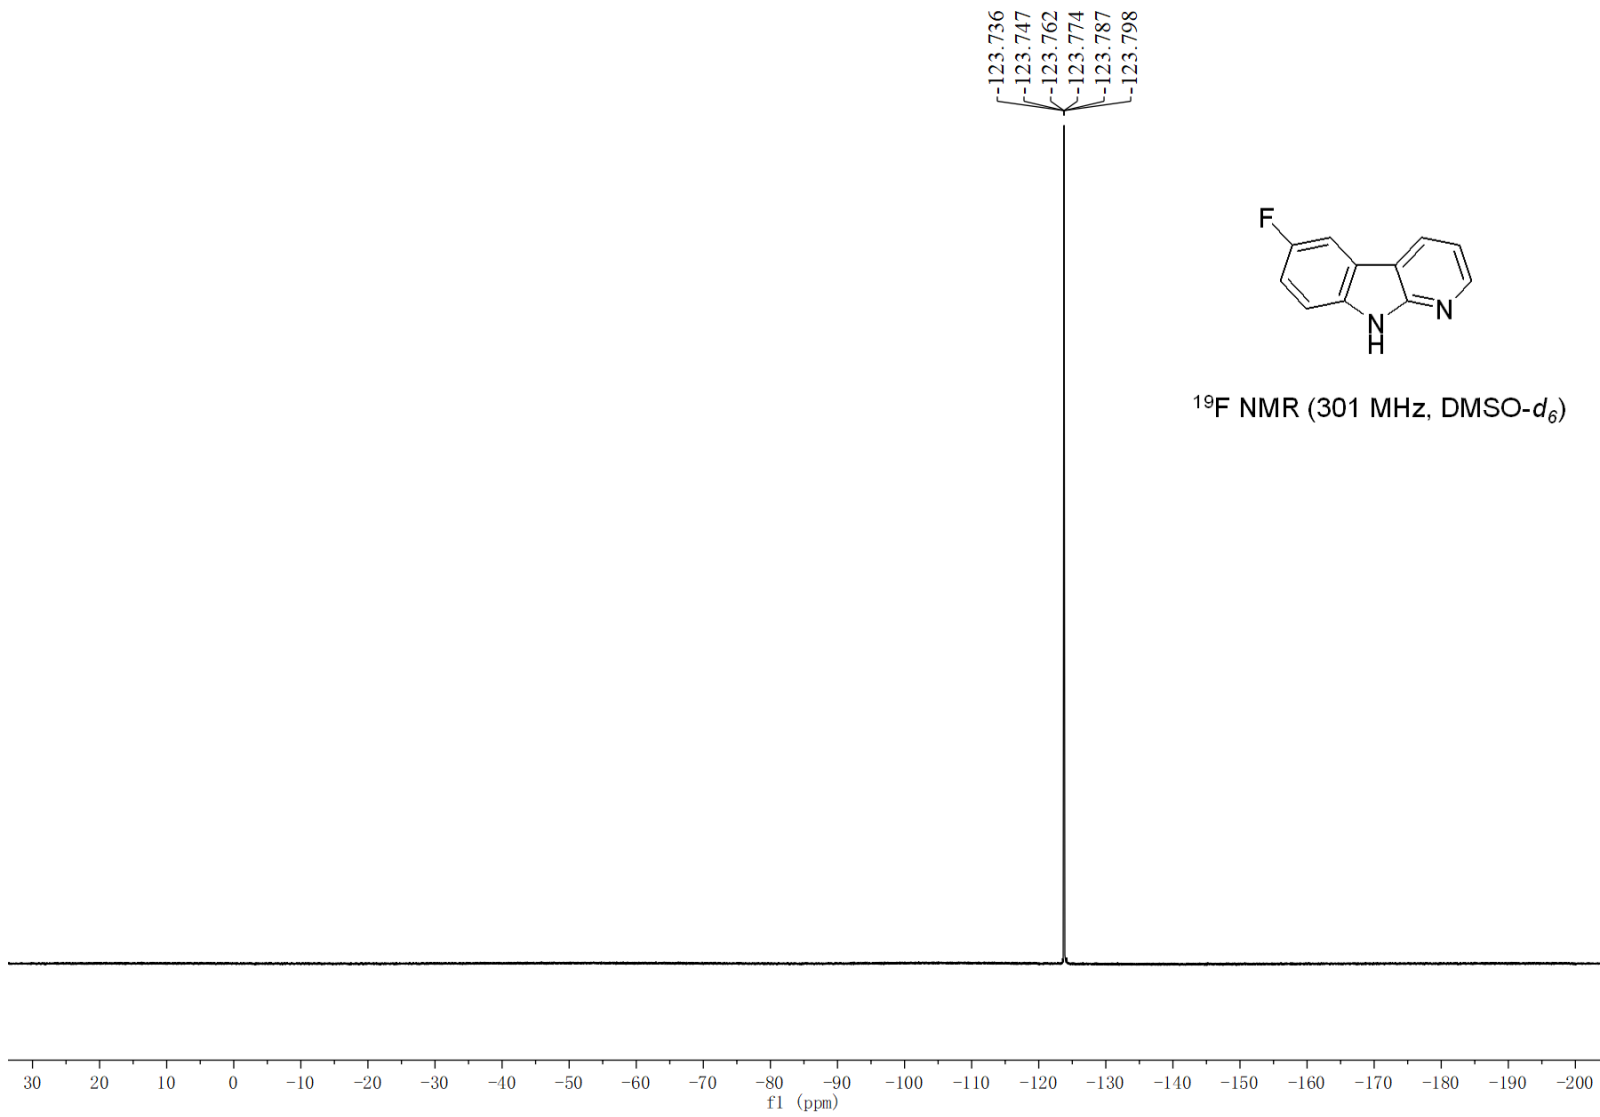

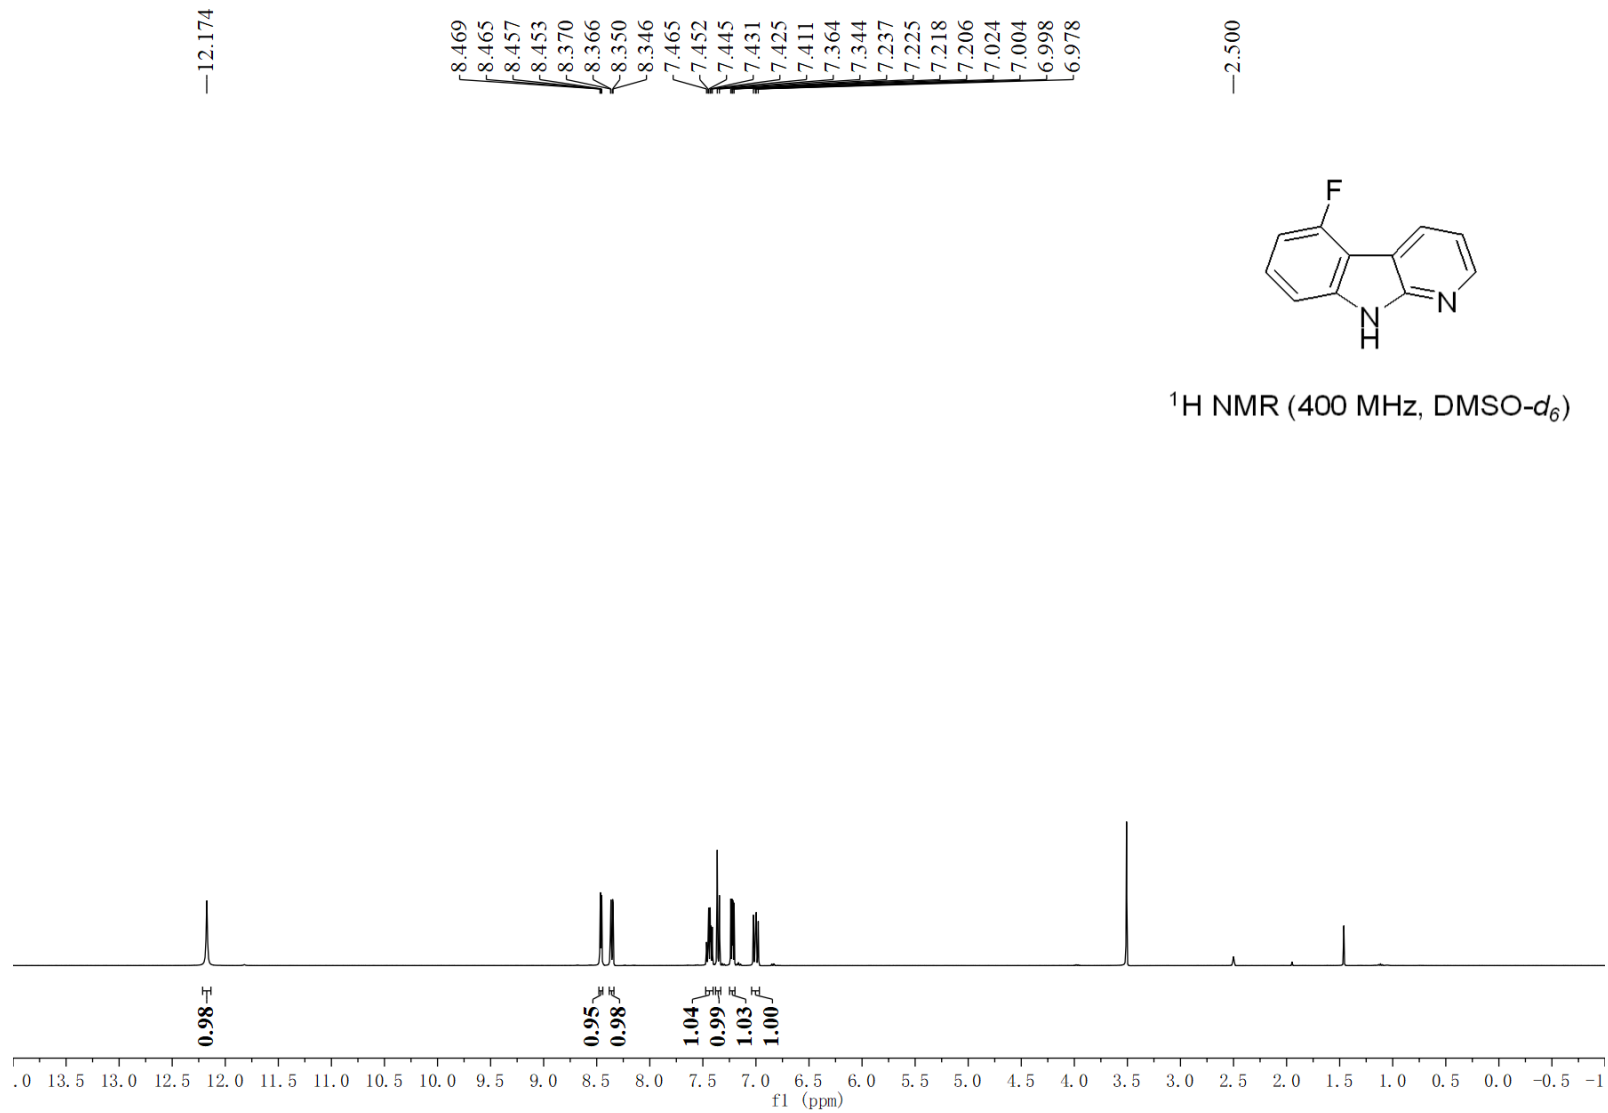

159.595  
157.141  
151.842  
146.918  
141.437  
141.338  
130.326  
130.299  
128.097  
128.013  
116.101  
112.731  
112.714  
108.125  
108.091  
105.512  
105.331

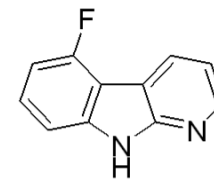

<sup>13</sup>C NMR (100 MHz, DMSO-d<sub>6</sub>)

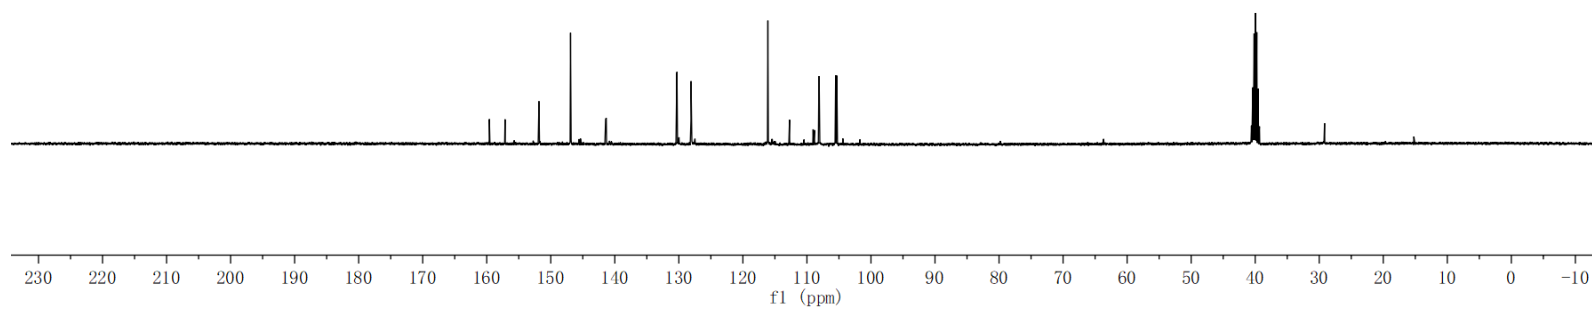

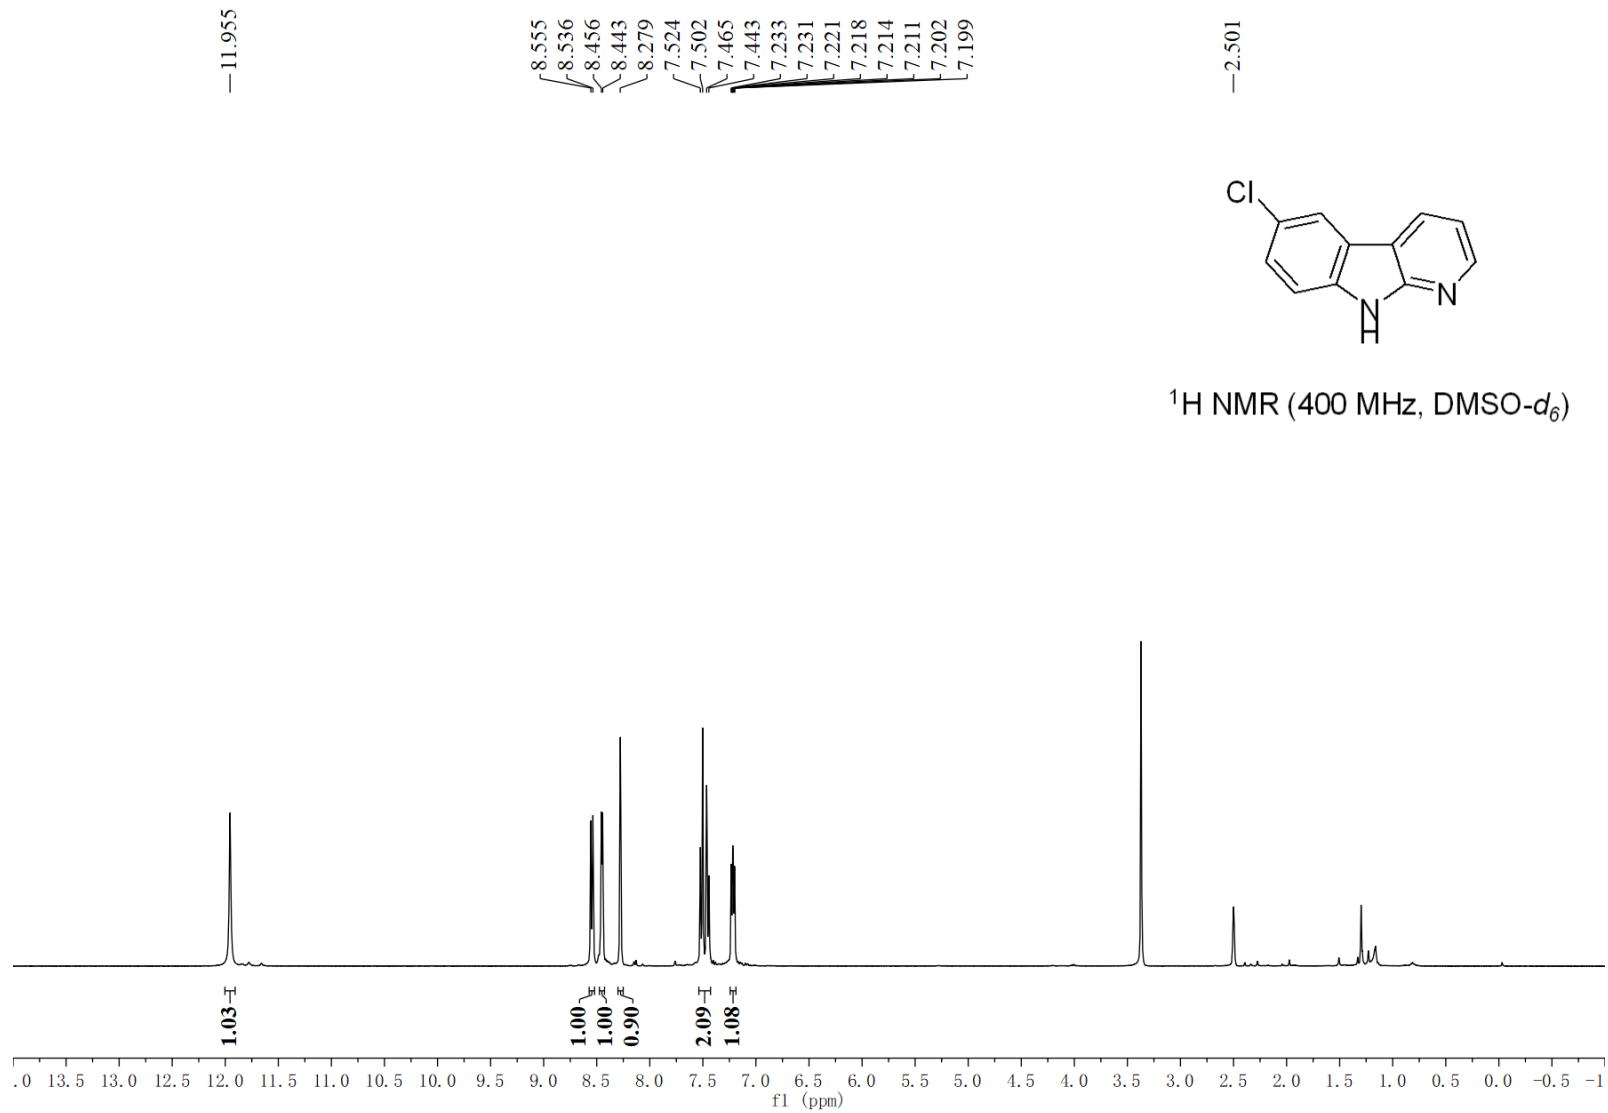

—152.666  
—147.393  
/137.647  
/129.571  
/126.826  
/124.161  
/122.142  
—121.240  
/115.758  
/114.872  
/113.211

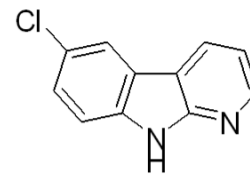

$^{13}\text{C}$  NMR (100 MHz,  $\text{DMSO-}d_6$ )

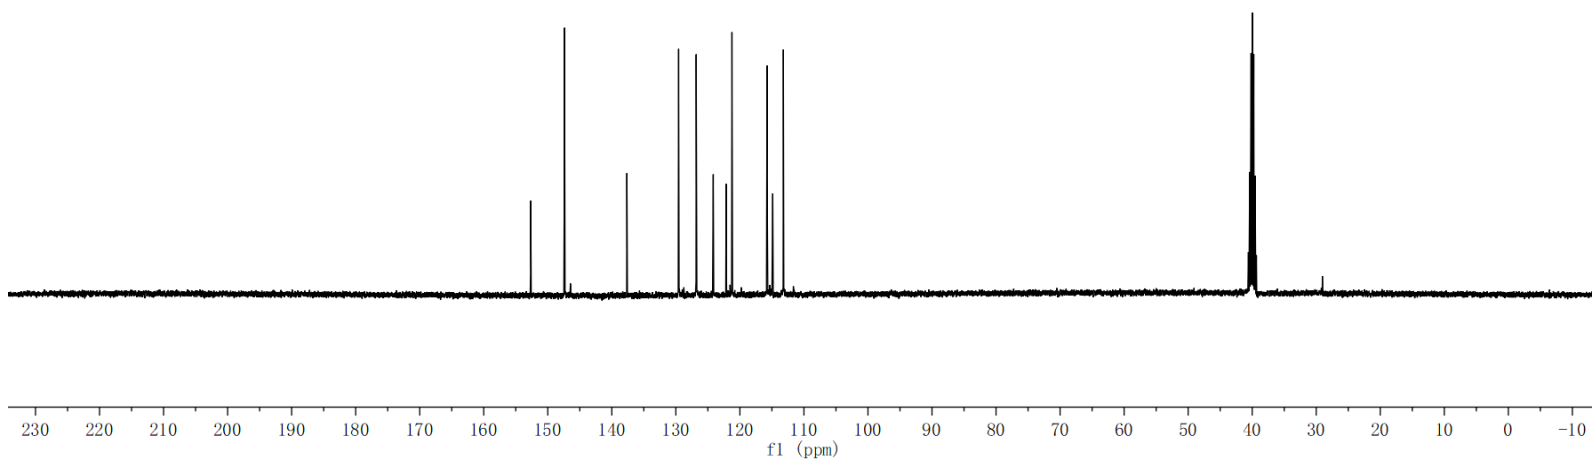

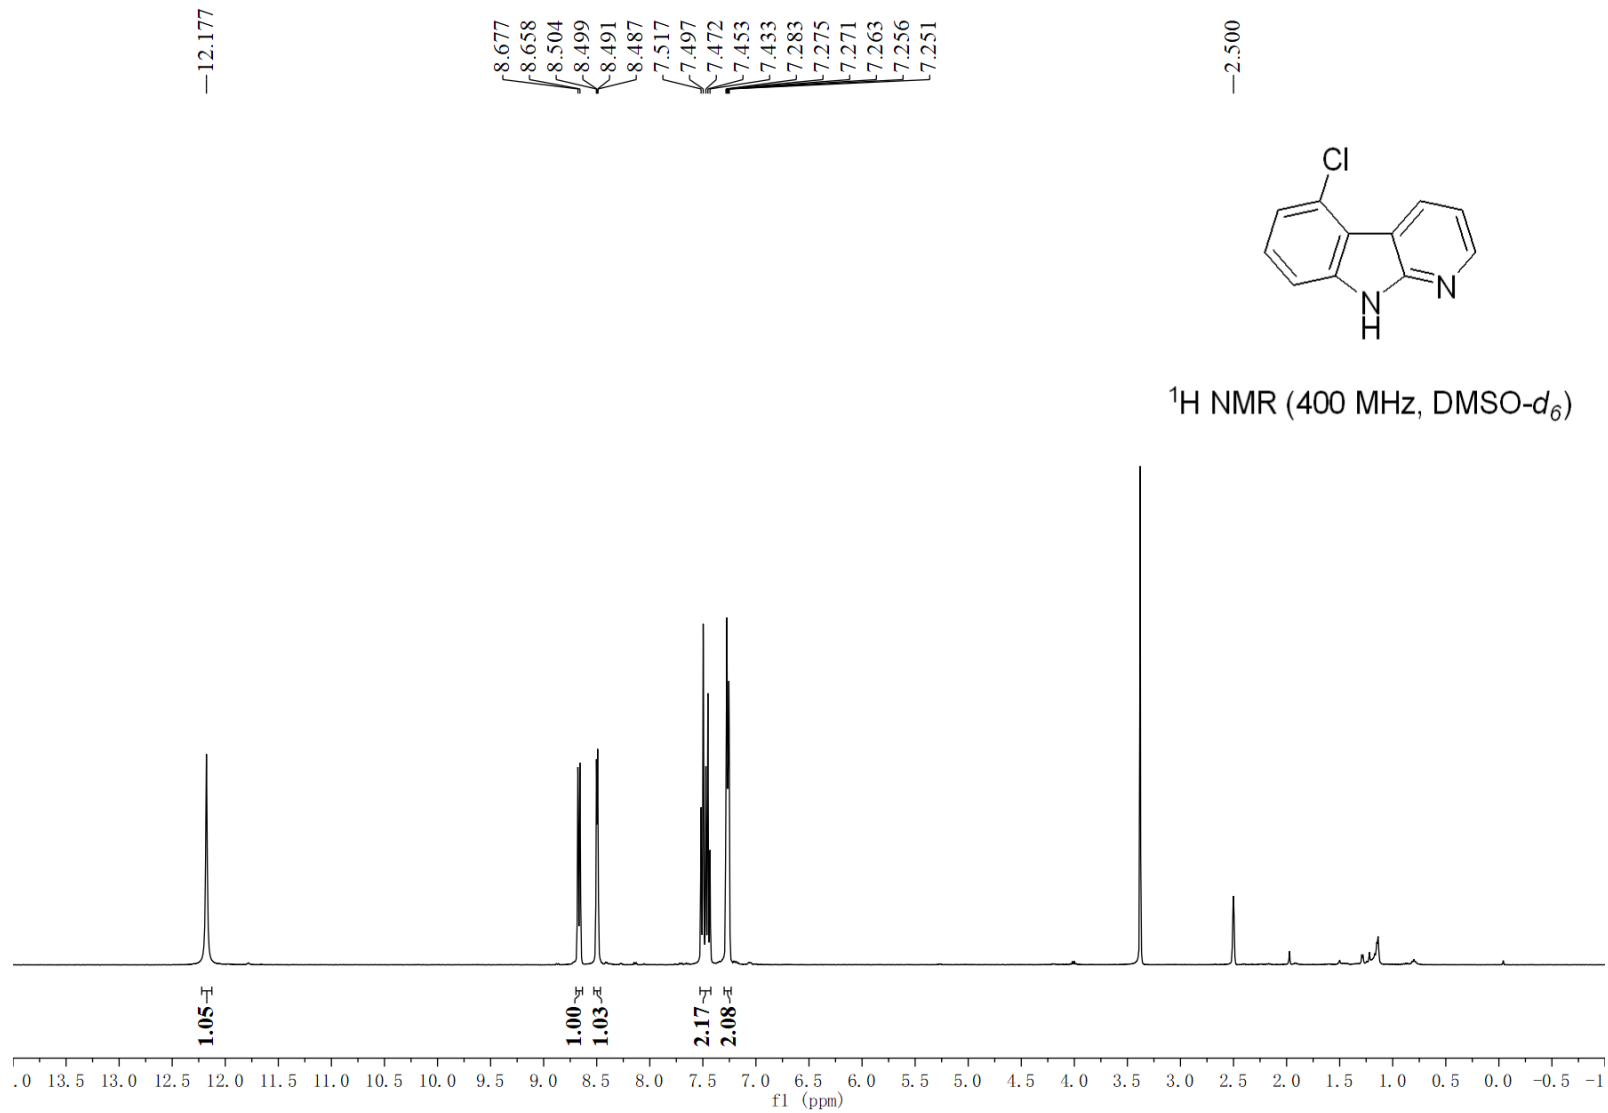



~152.079  
~147.260  
~140.386  
130.433  
128.195  
127.802  
120.189  
117.963  
115.895  
114.313  
110.659

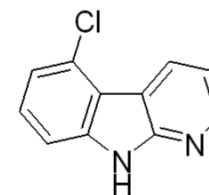

$^{13}\text{C}$  NMR (100 MHz,  $\text{DMSO-}d_6$ )

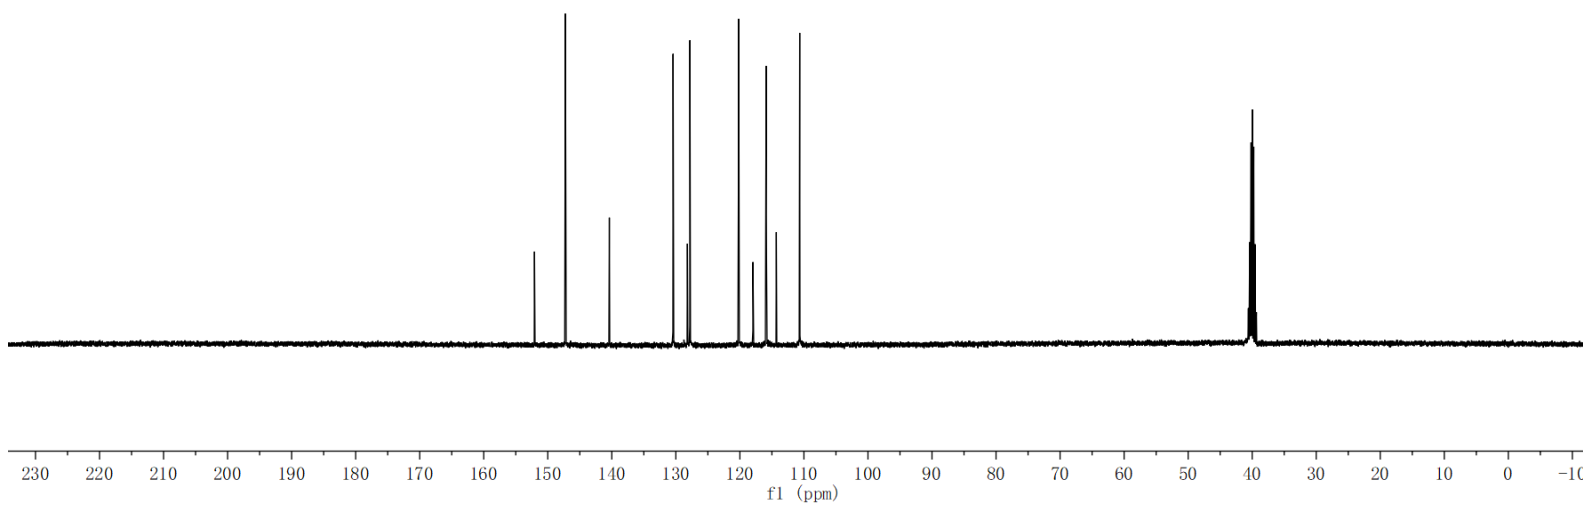

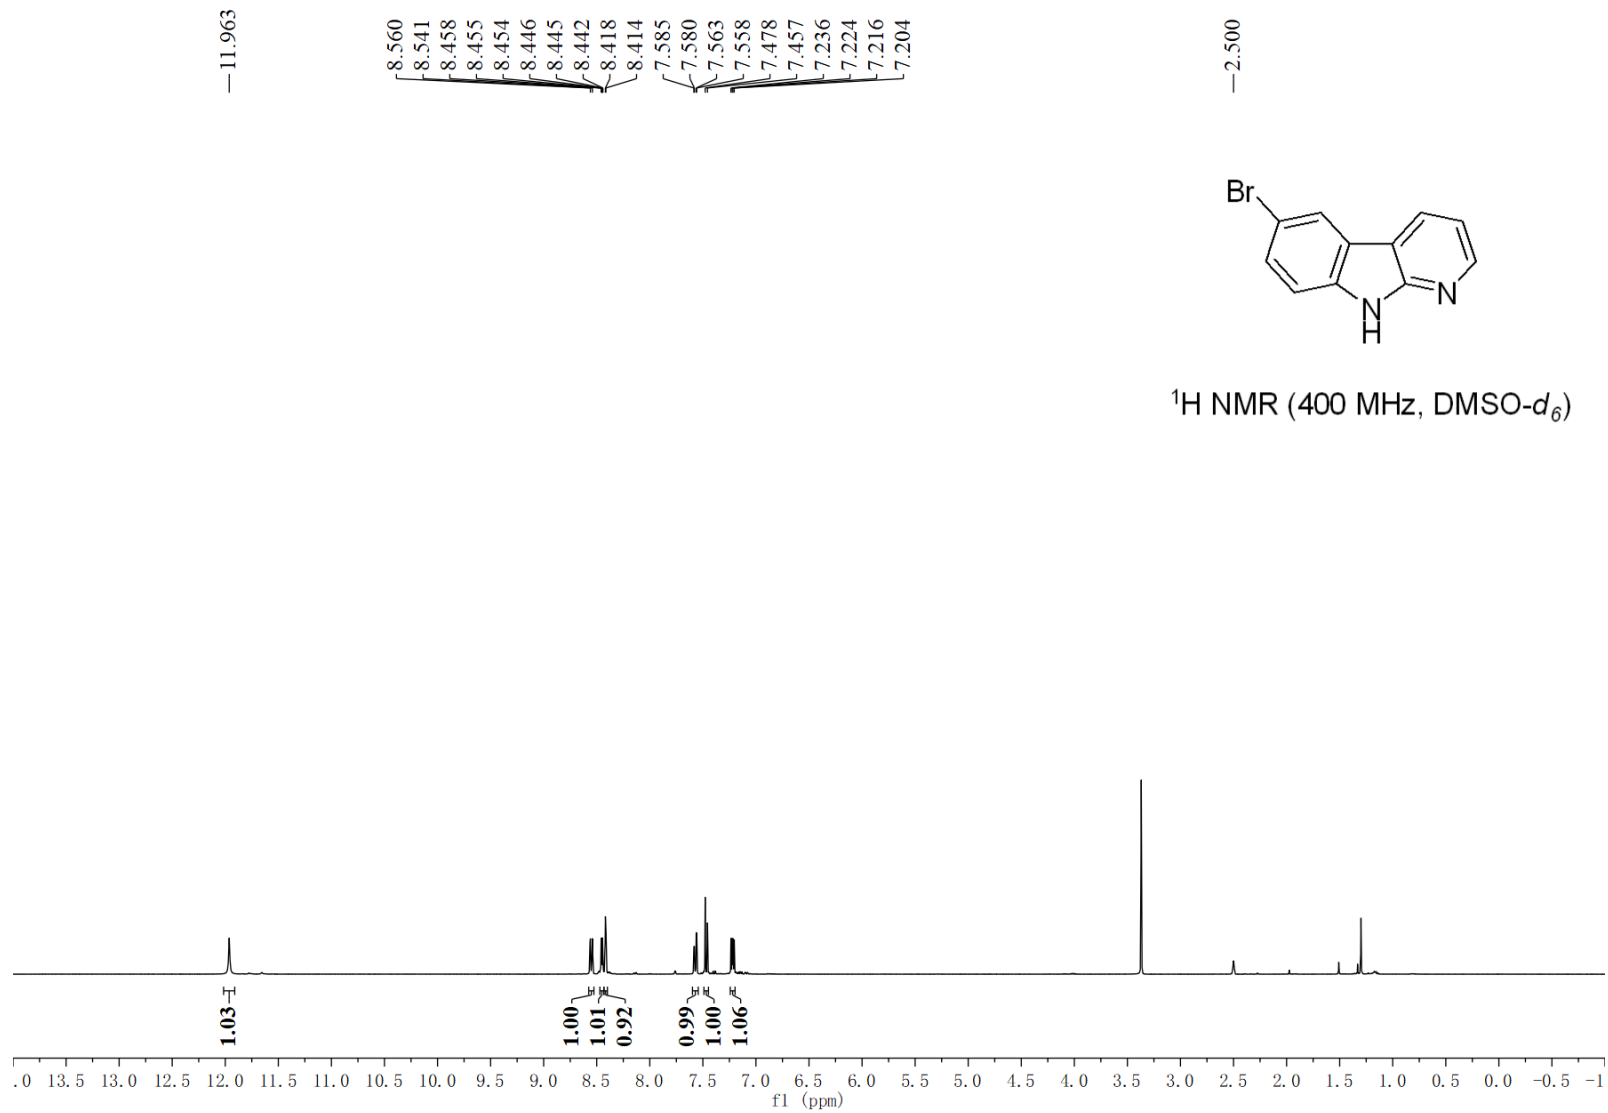

—152.449  
—147.414  
/ 137.896  
/ 129.633  
/ 129.419  
/ 124.217  
/ 122.749  
/ 115.827  
/ 114.726  
/ 113.668  
/ 111.858

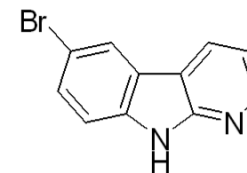

<sup>13</sup>C NMR (100 MHz, DMSO-*d*<sub>6</sub>)

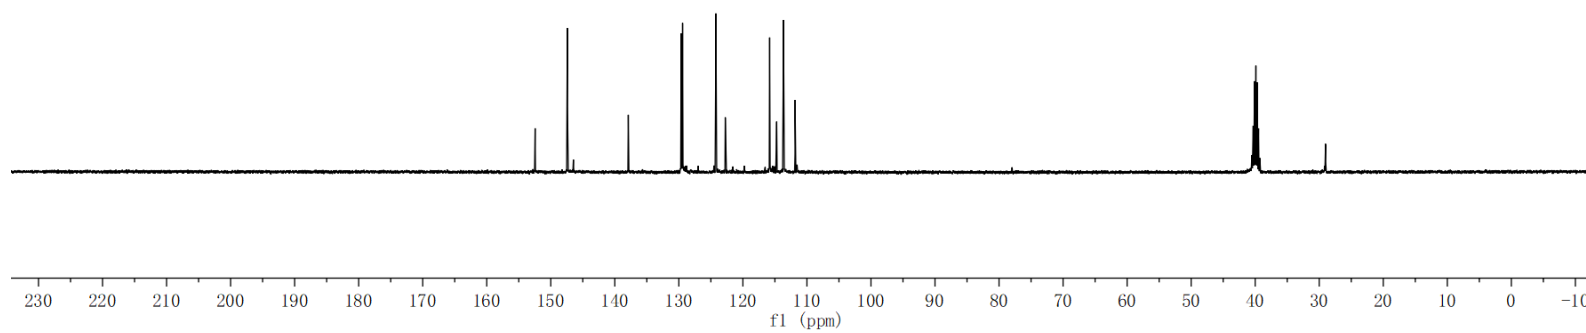

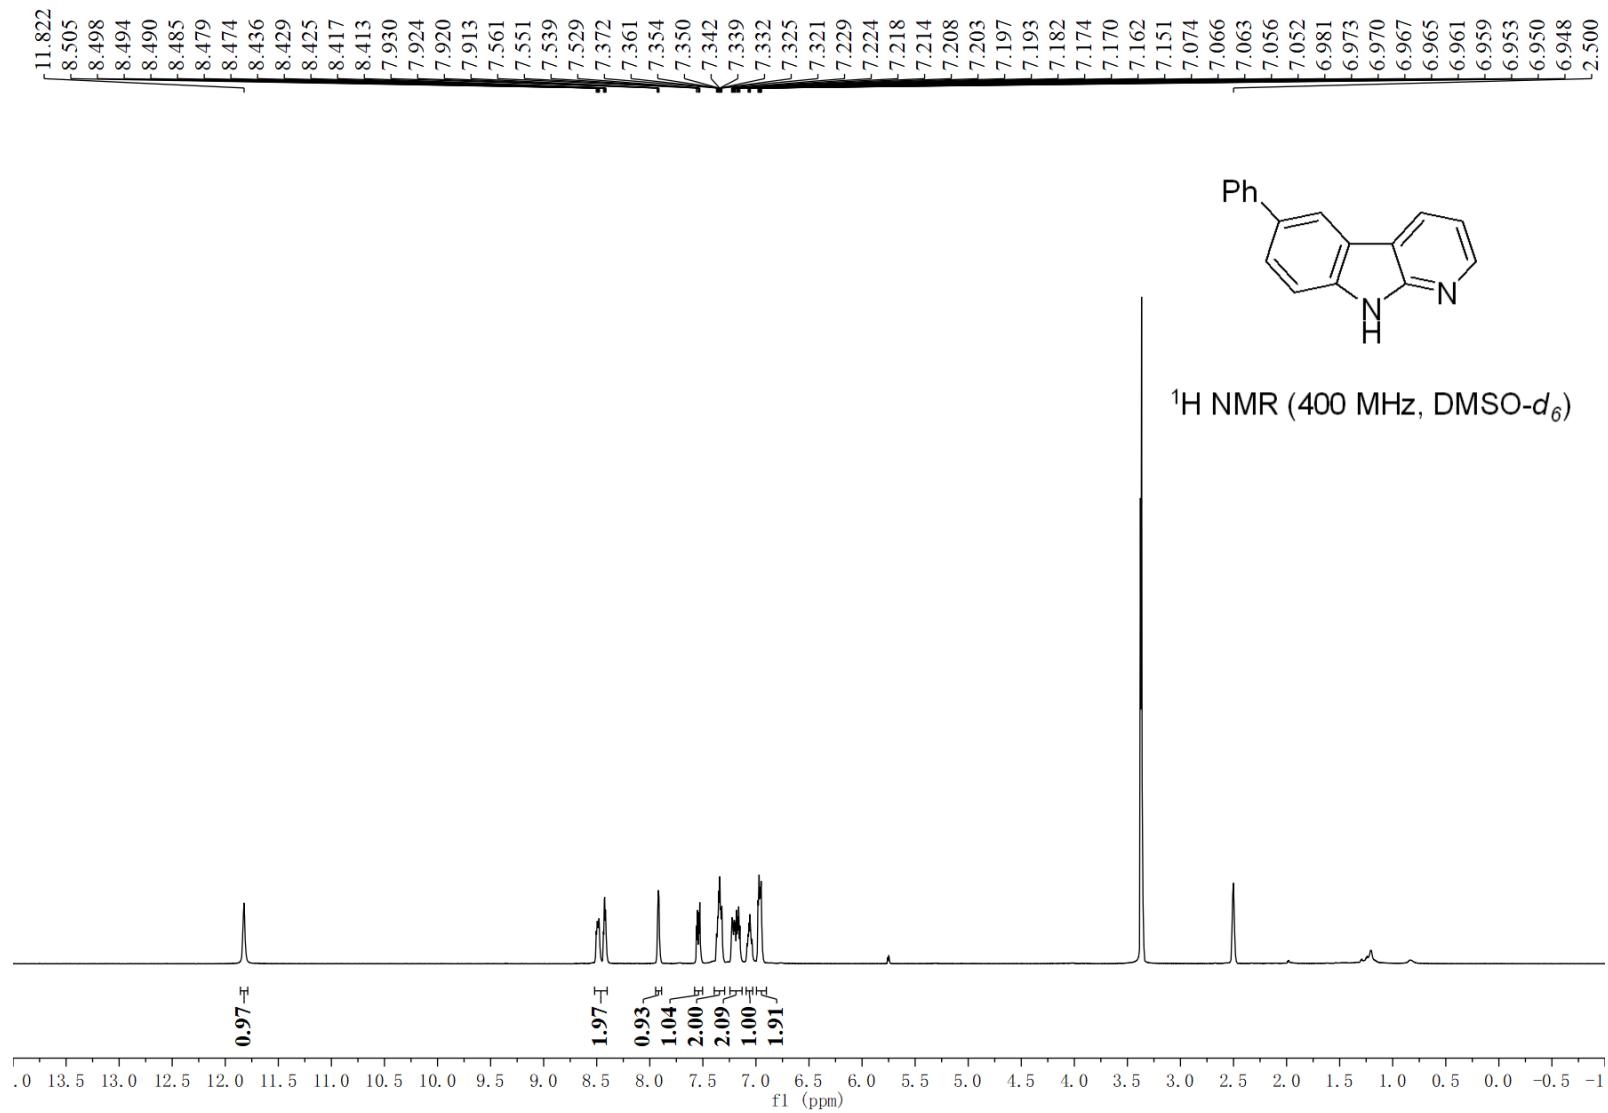

159.248  
152.916  
149.414  
146.955  
135.991  
130.287  
129.352  
122.701  
121.657  
120.175  
117.435  
115.515  
115.301  
112.862  
112.754

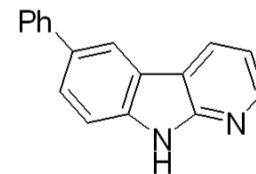

$^{13}\text{C}$  NMR (100 MHz,  $\text{DMSO-}d_6$ )

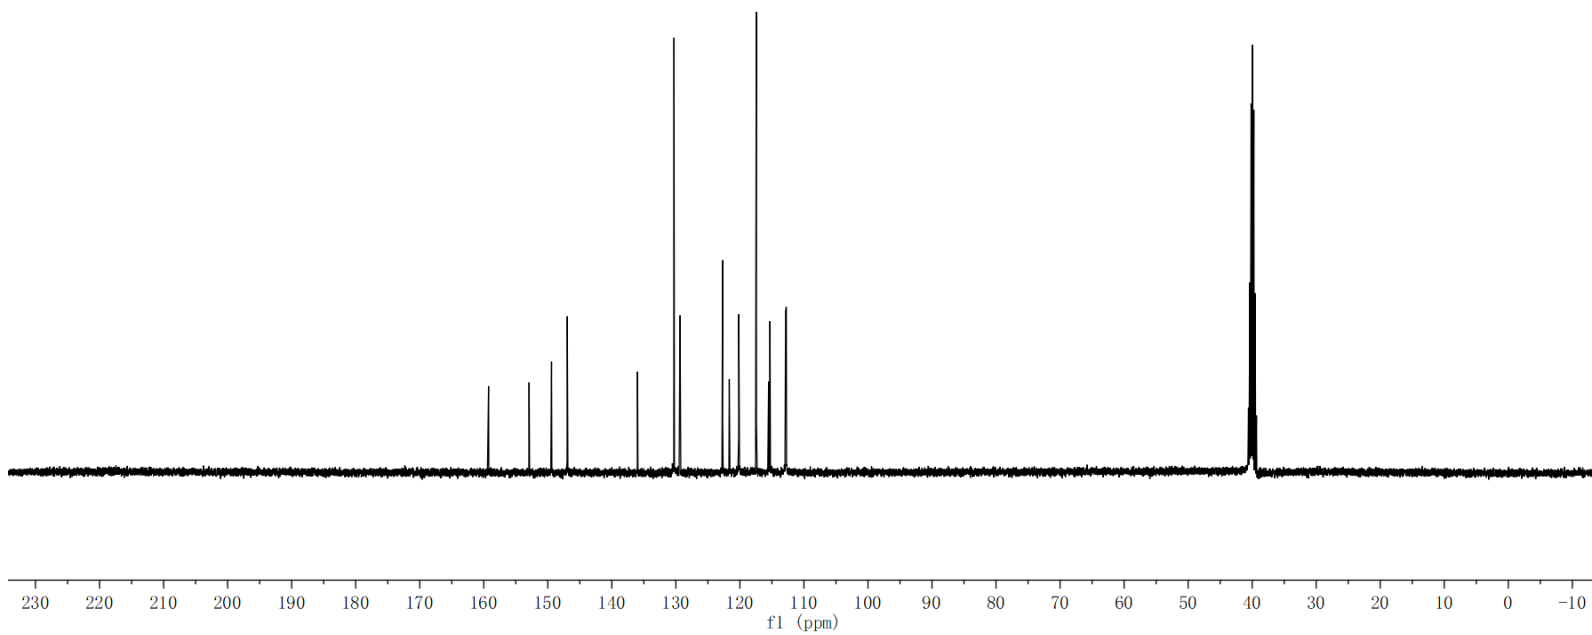

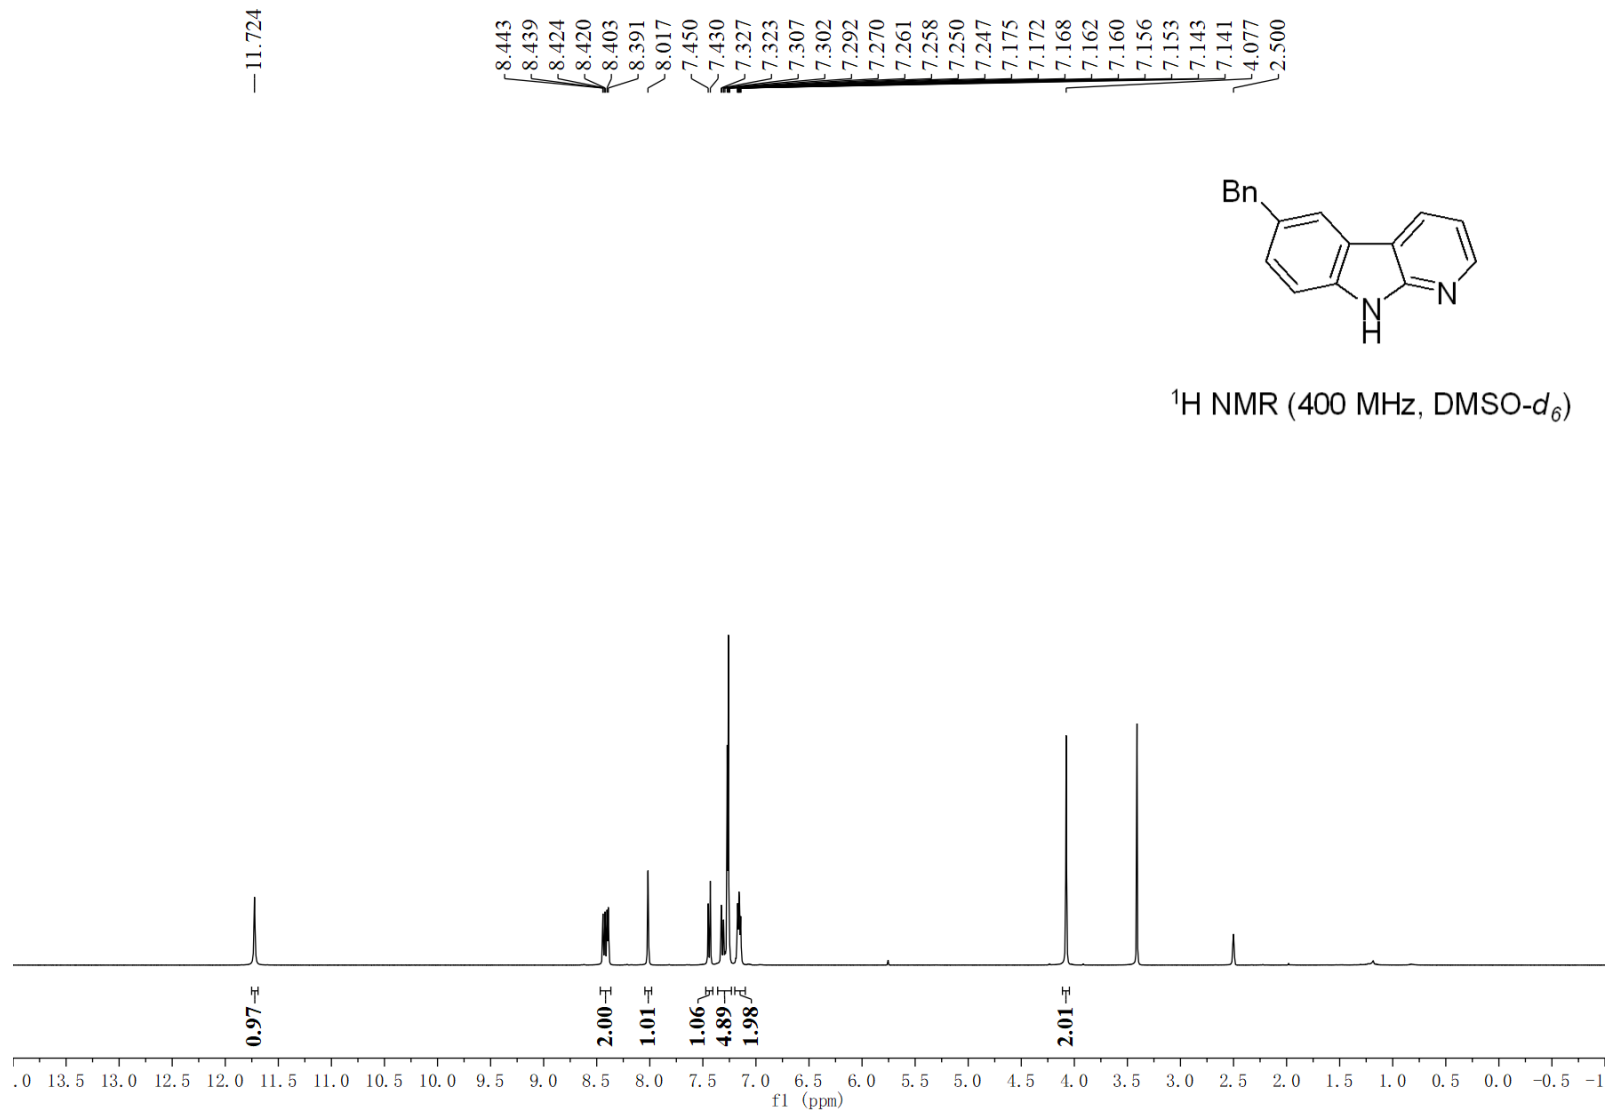

152.605  
146.392  
142.590  
137.760  
132.757  
129.043  
128.800  
128.690  
128.135  
126.240  
121.310  
120.973  
115.529  
115.246  
111.650

41.703

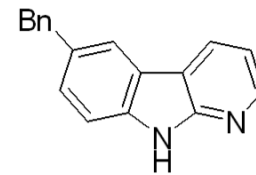

$^{13}\text{C}$  NMR (100 MHz,  $\text{DMSO-}d_6$ )

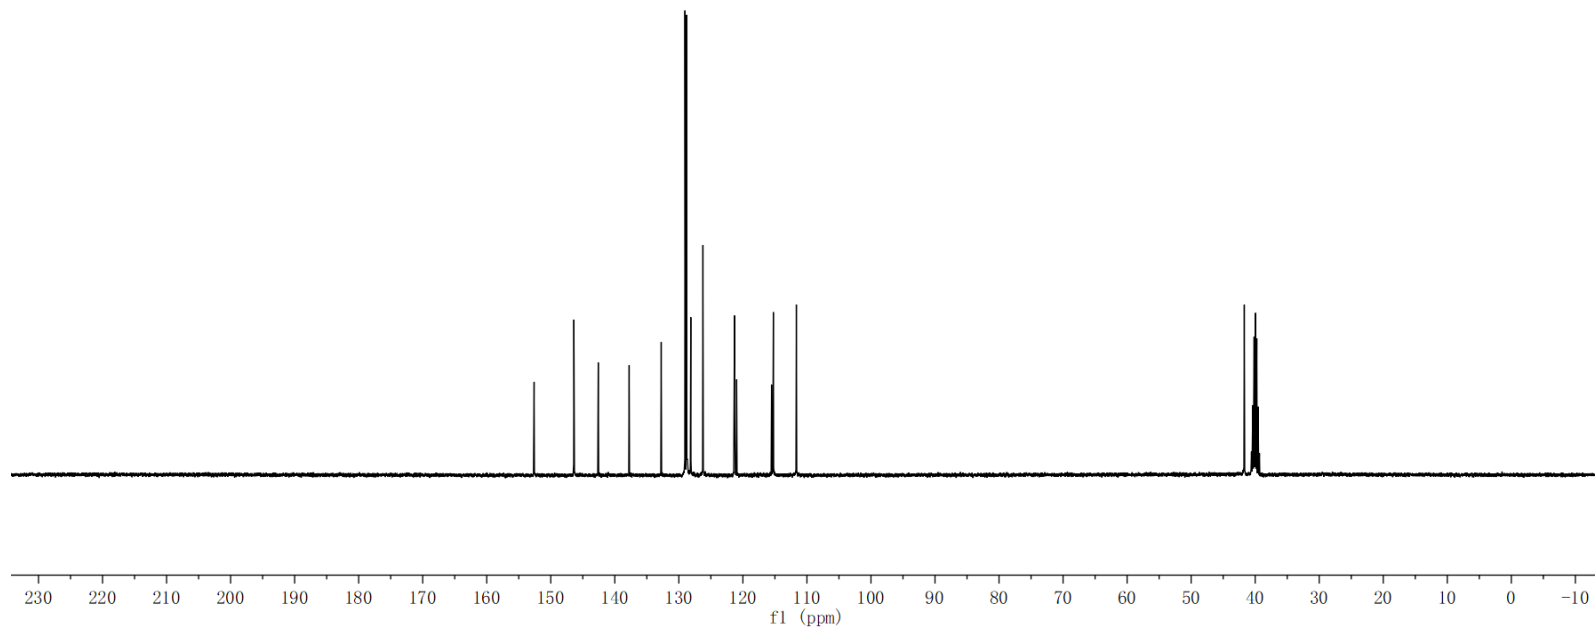

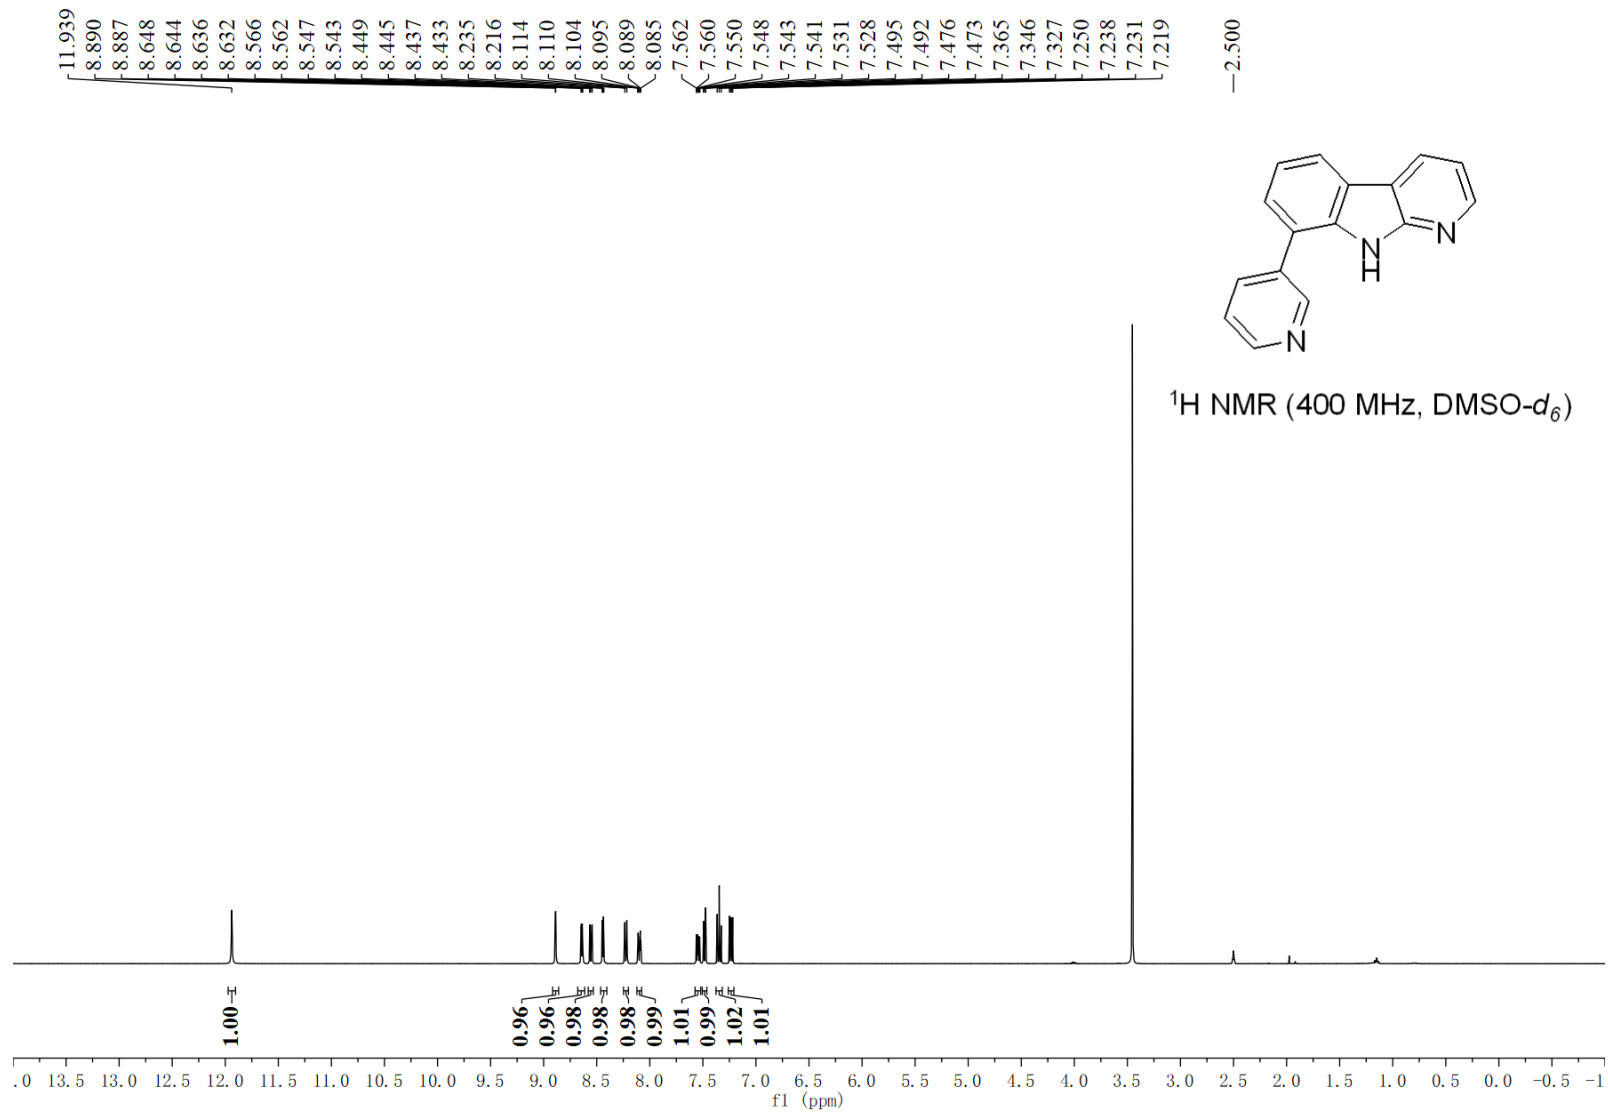



152.999  
149.562  
148.821  
146.930  
136.782  
136.669  
134.346  
129.010  
127.655  
124.335  
122.371  
121.916  
121.427  
120.545  
115.819  
115.655

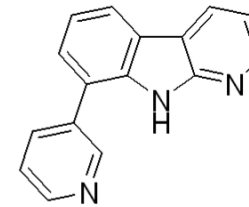

<sup>13</sup>C NMR (100 MHz, DMSO-d<sub>6</sub>)

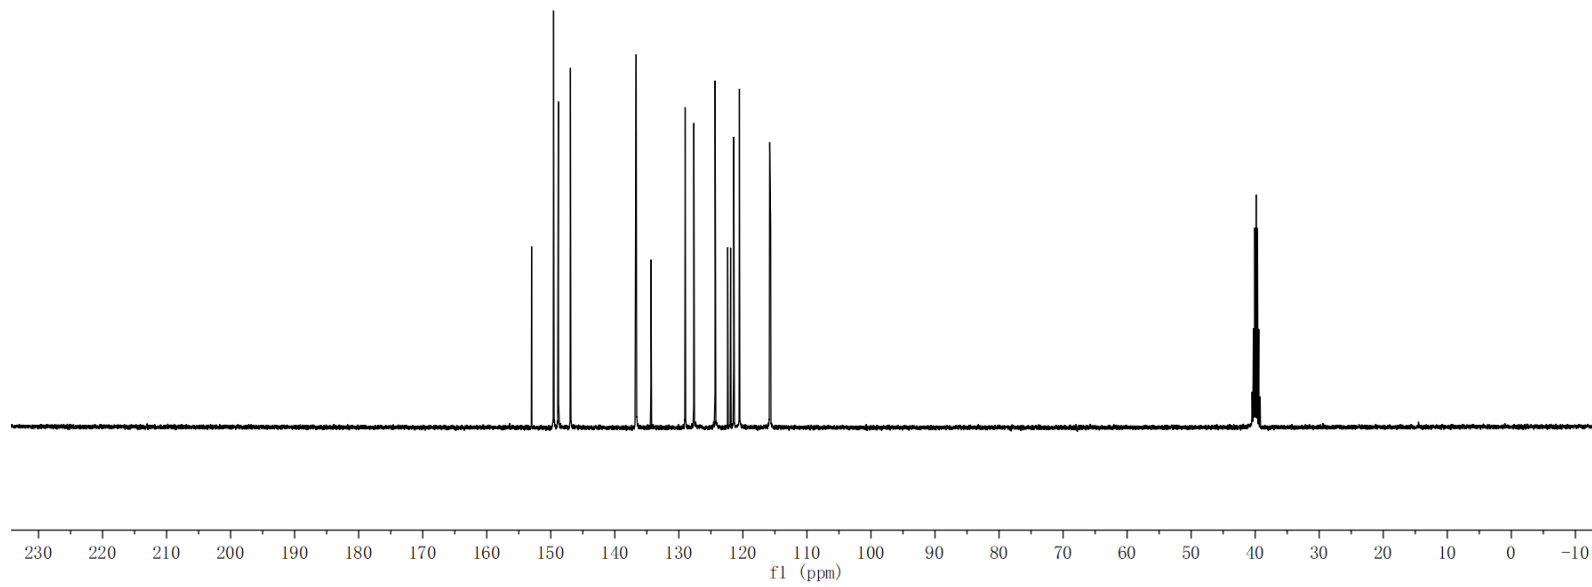

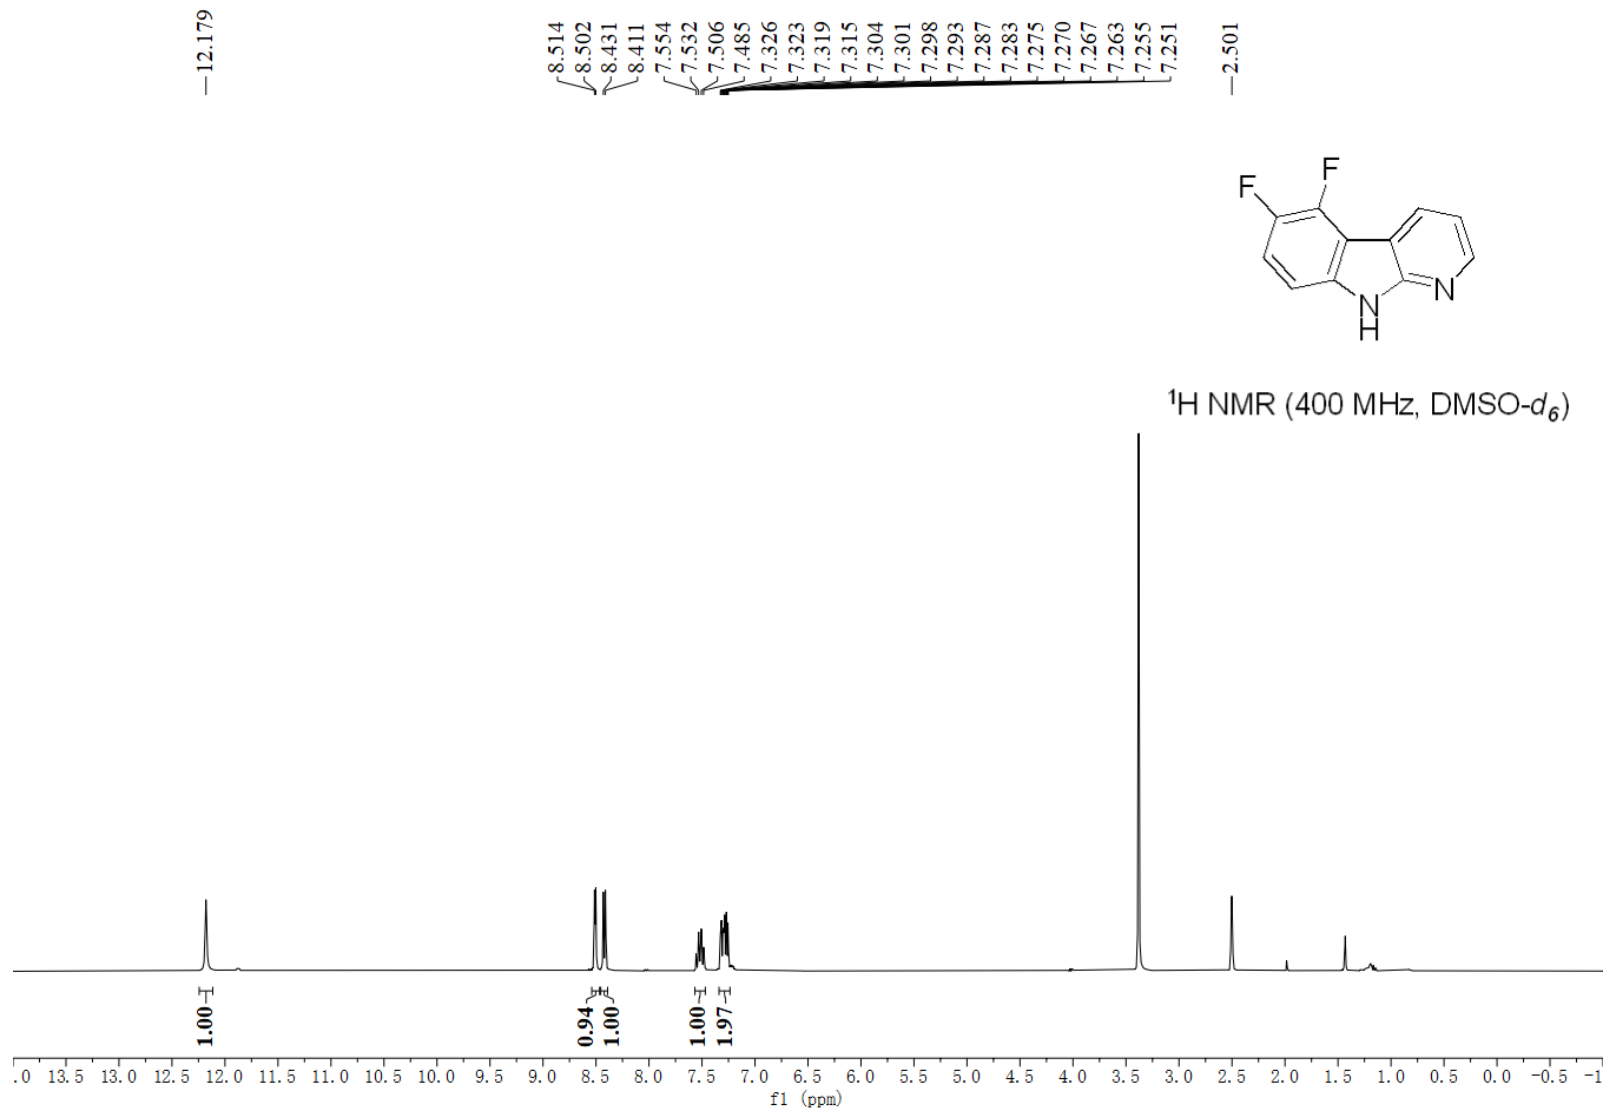

152.395  
147.744  
146.377  
146.228  
144.706  
143.903  
143.755  
142.486  
142.380  
136.759  
136.679  
130.723  
130.697  
116.460  
116.256  
116.100  
107.893  
107.853  
107.822  
107.784

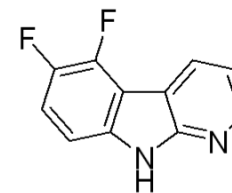

<sup>13</sup>C NMR (100 MHz, DMSO-*d*<sub>6</sub>)

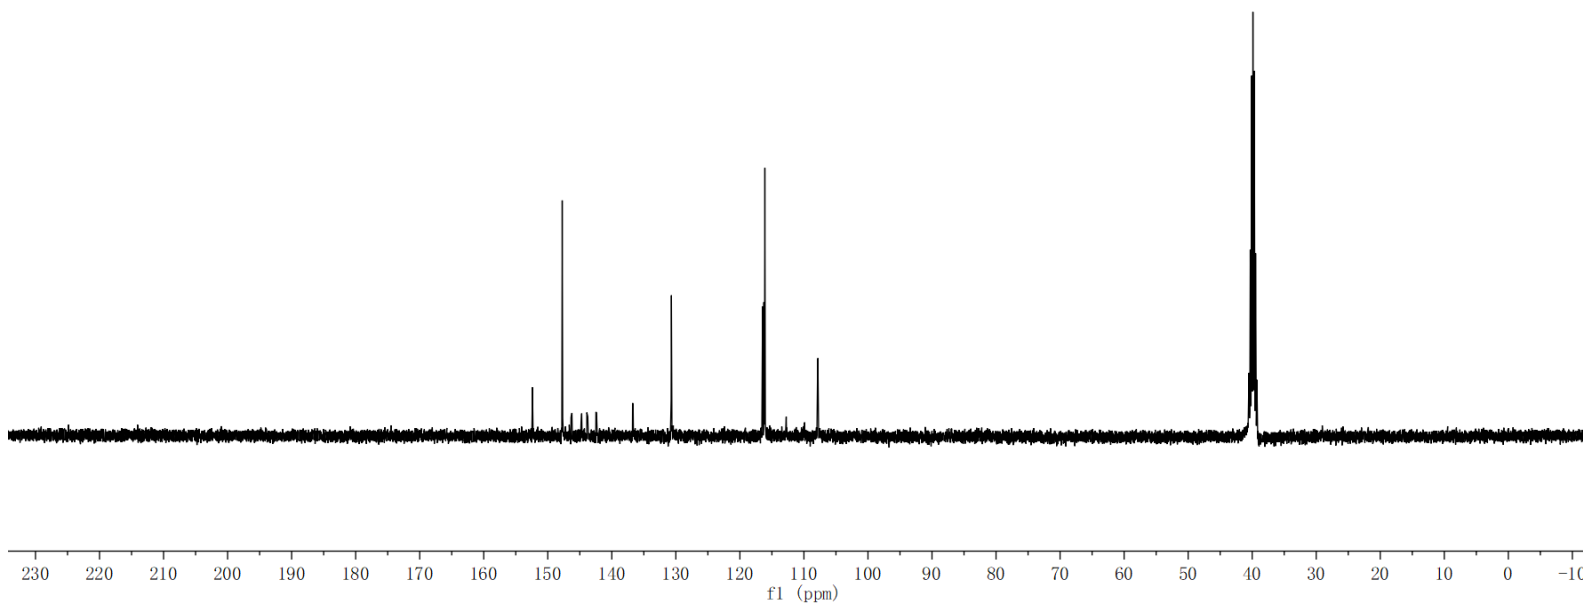

-145.563  
-145.584  
-145.622  
-145.644  
-151.580  
-151.589  
-151.610  
-151.619  
-151.640  
-151.649  
-151.670  
-151.679

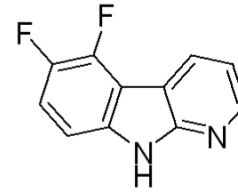

$^{19}\text{F}$  NMR (301 MHz,  $\text{DMSO-}d_6$ )

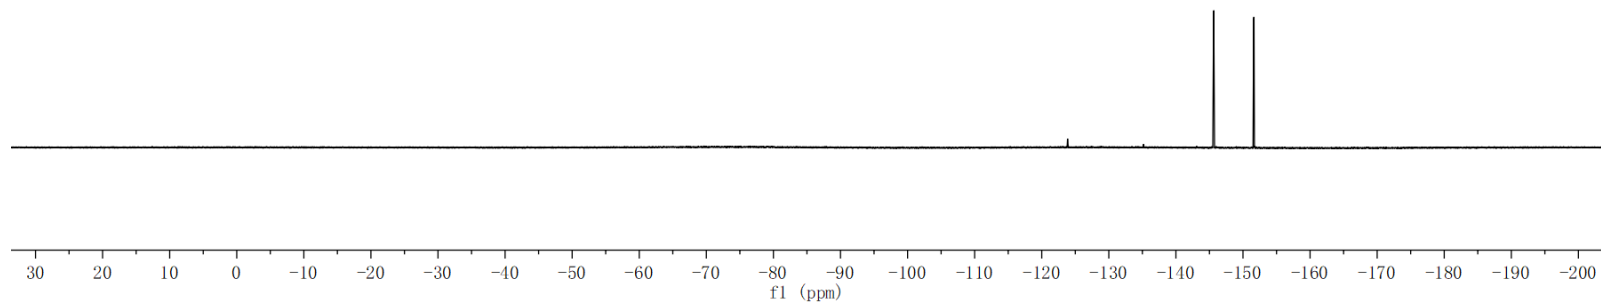

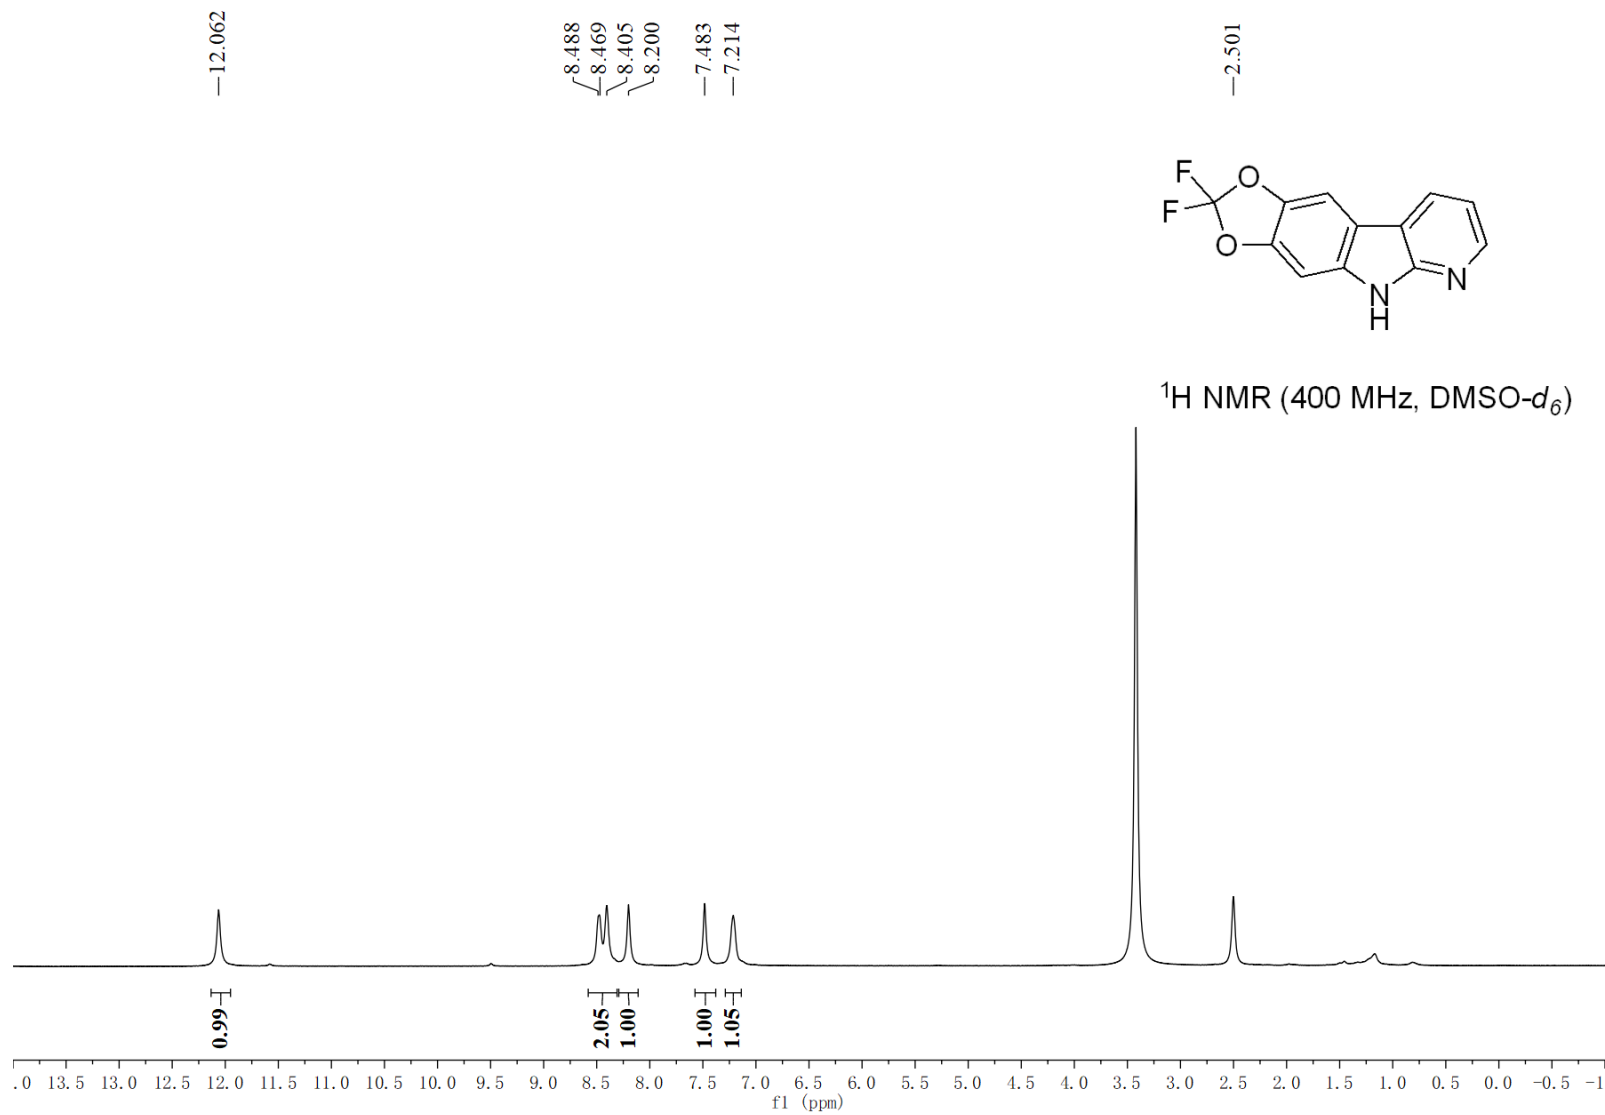

152.217  
146.310  
142.518  
137.802  
135.227  
134.160  
131.664  
128.833  
115.721  
115.511  
102.789  
94.269

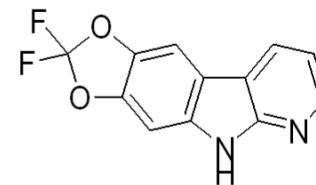

$^{13}\text{C}$  NMR (100 MHz,  $\text{DMSO-}d_6$ )

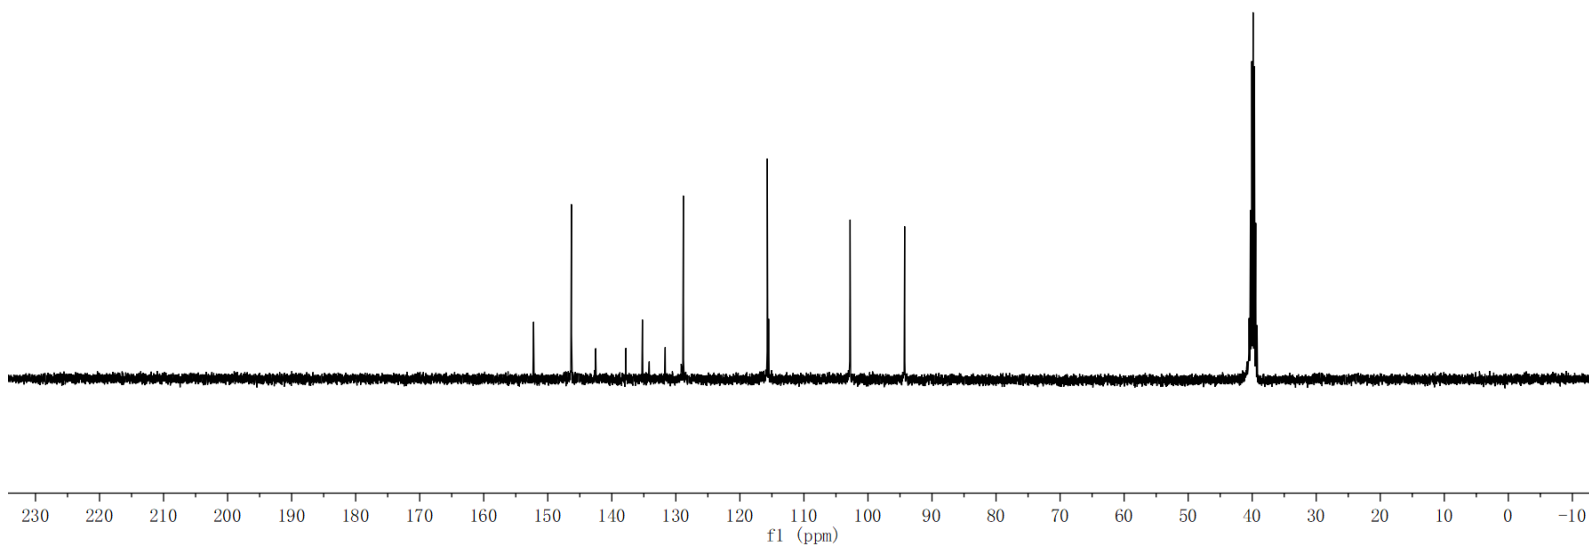

--49.132

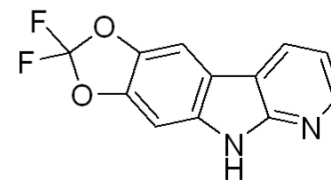

<sup>19</sup>F NMR (301 MHz, DMSO-*d*<sub>6</sub>)

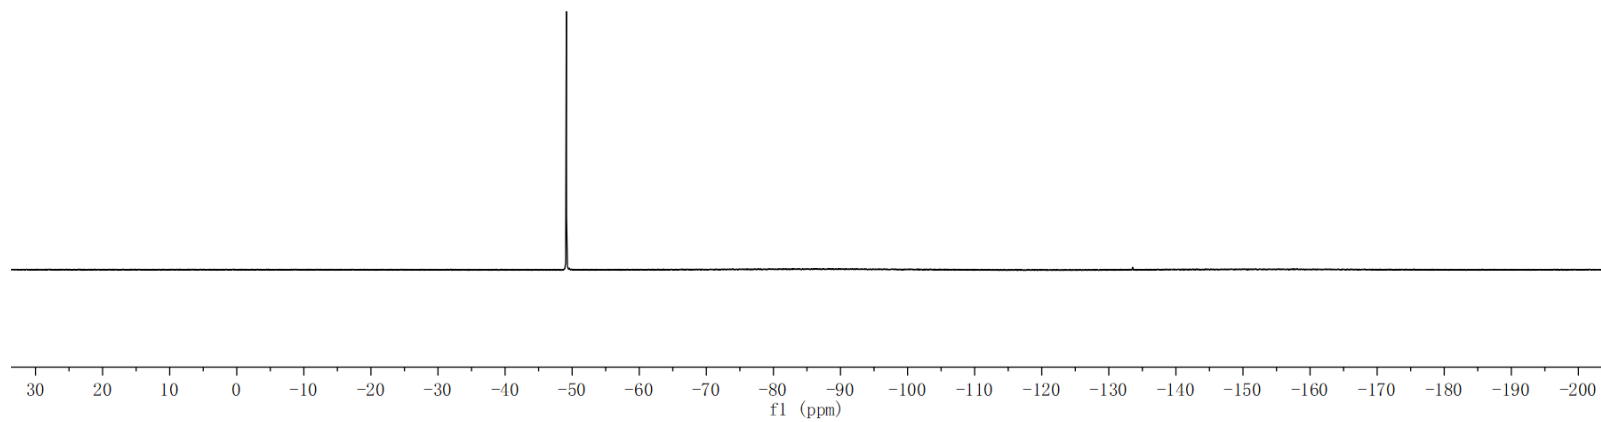

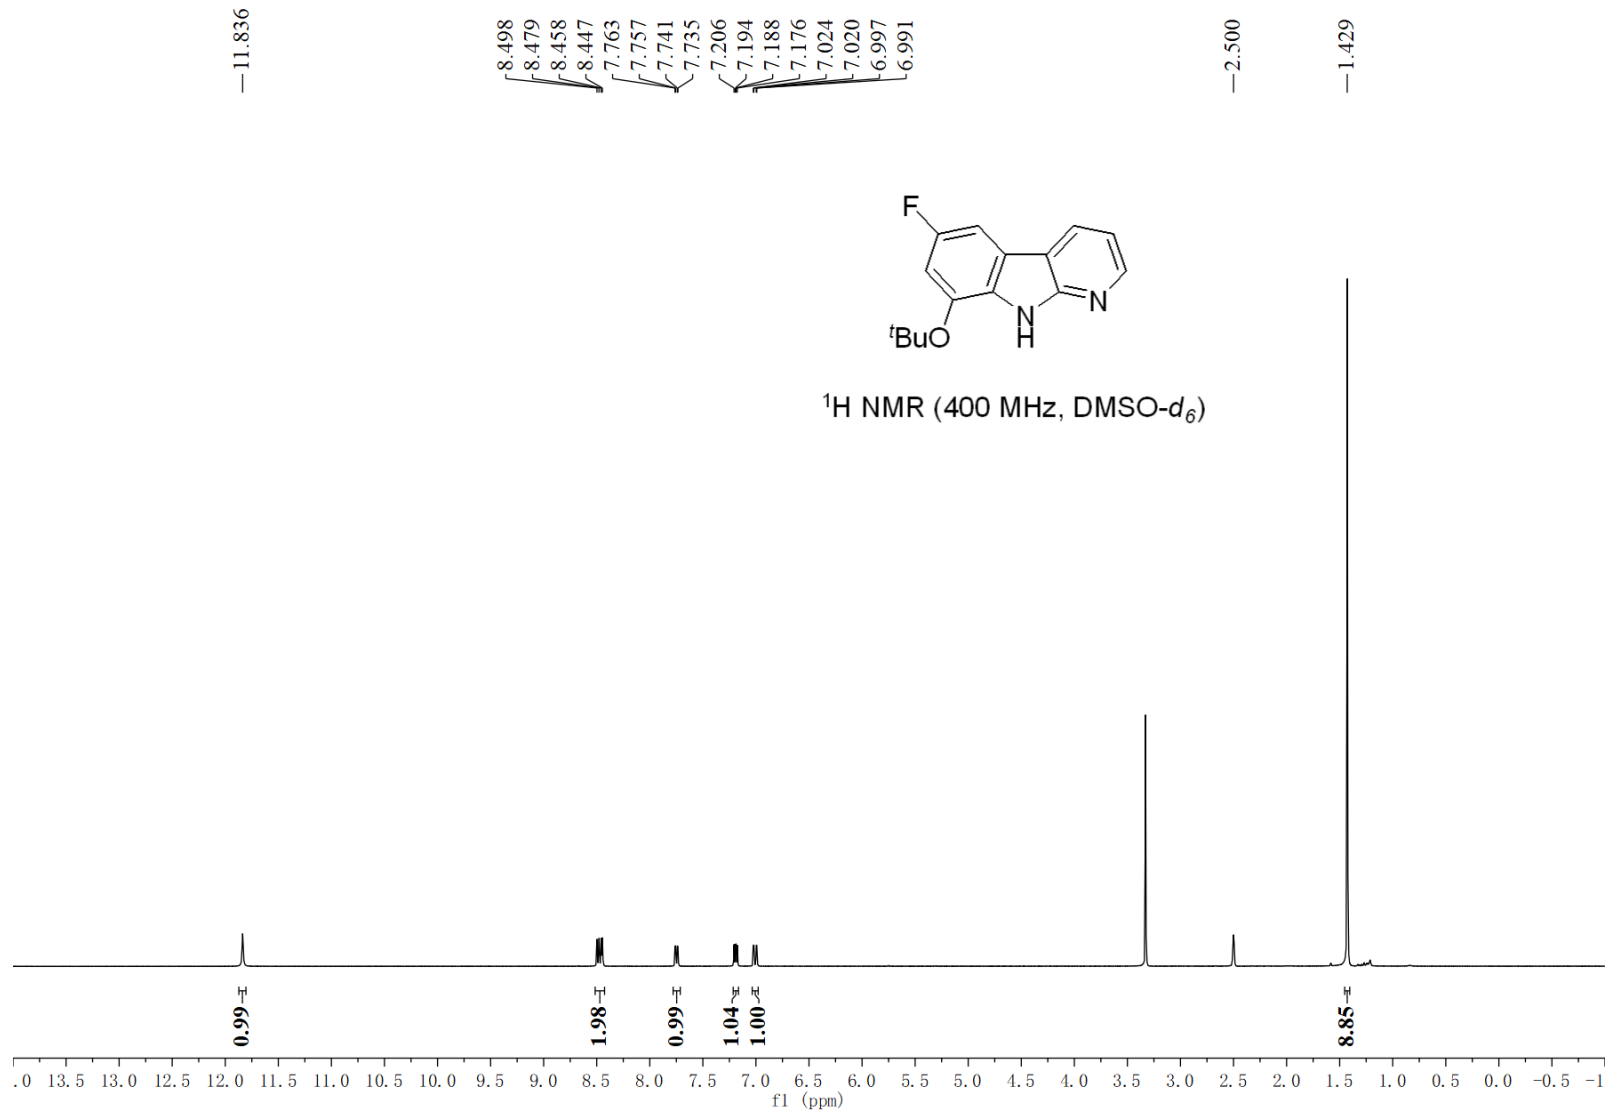



157.798  
155.467  
152.745  
147.264  
141.672  
141.557  
131.179  
129.494  
121.640  
121.521  
115.327  
109.222  
108.965  
102.132  
101.894

81.476

28.659

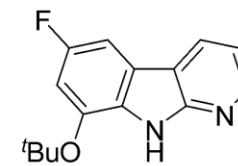

<sup>13</sup>C NMR (100 MHz, DMSO-*d*<sub>6</sub>)

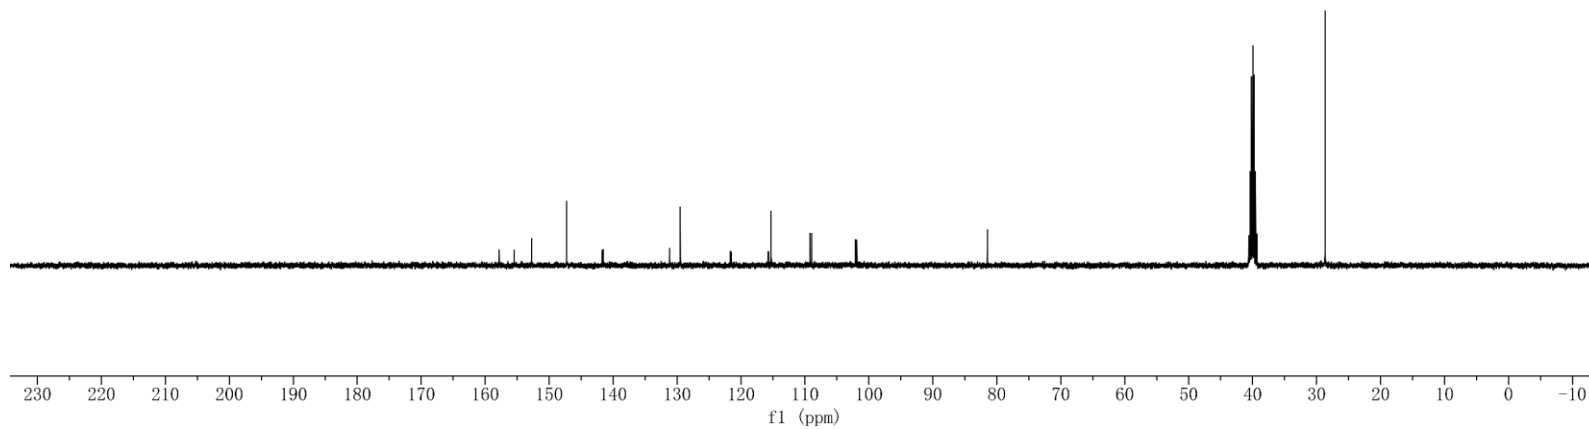

-121.953  
-121.975  
-121.982  
-122.005

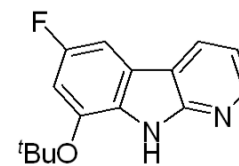

$^{19}\text{F}$  NMR (301 MHz,  $\text{DMSO-}d_6$ )

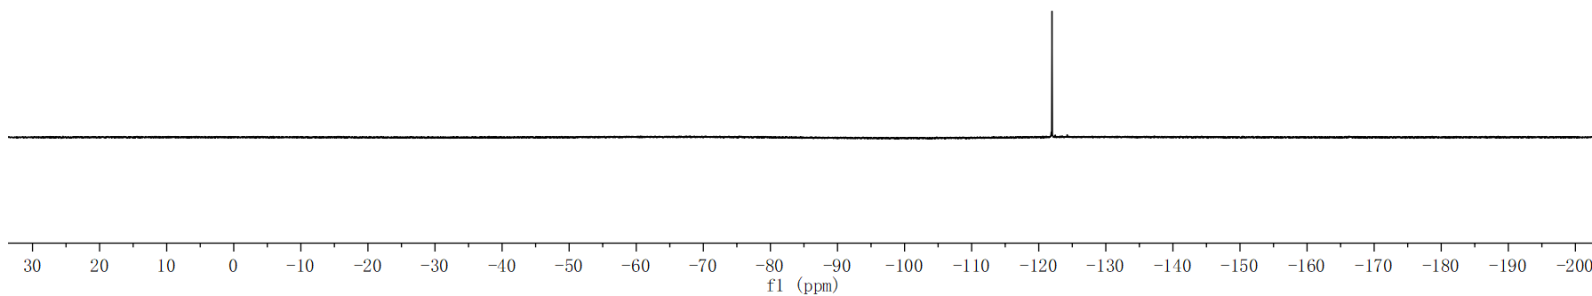

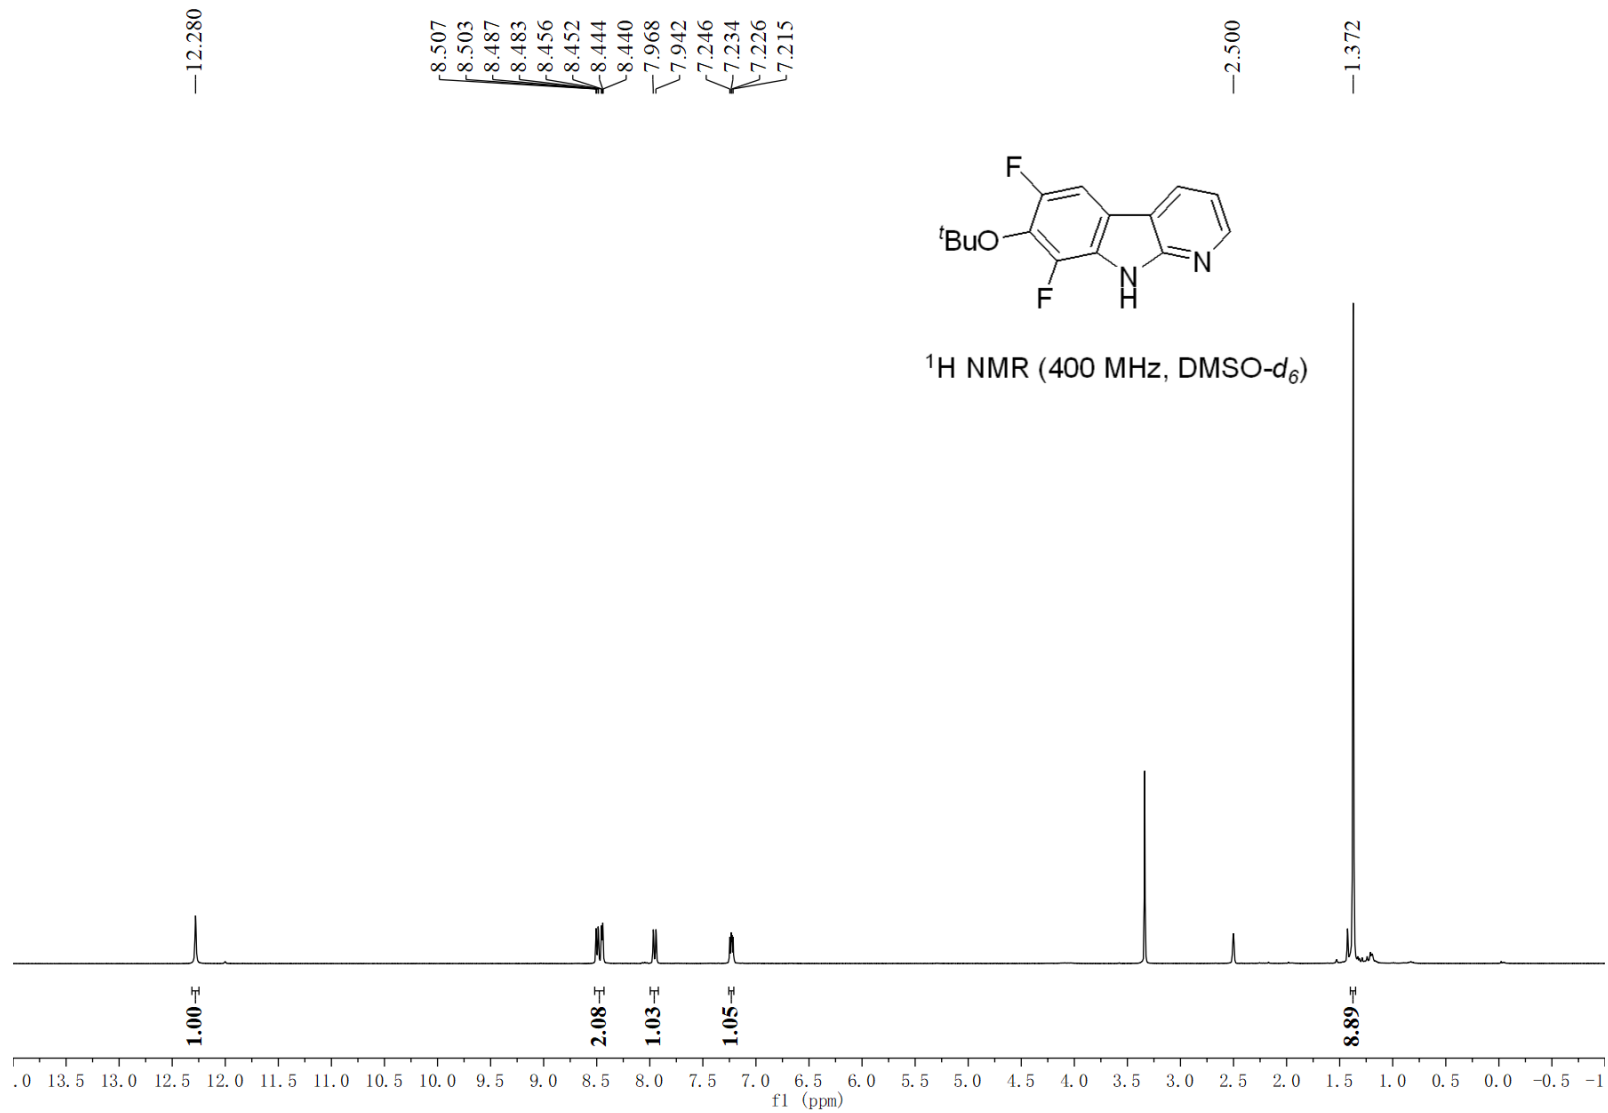

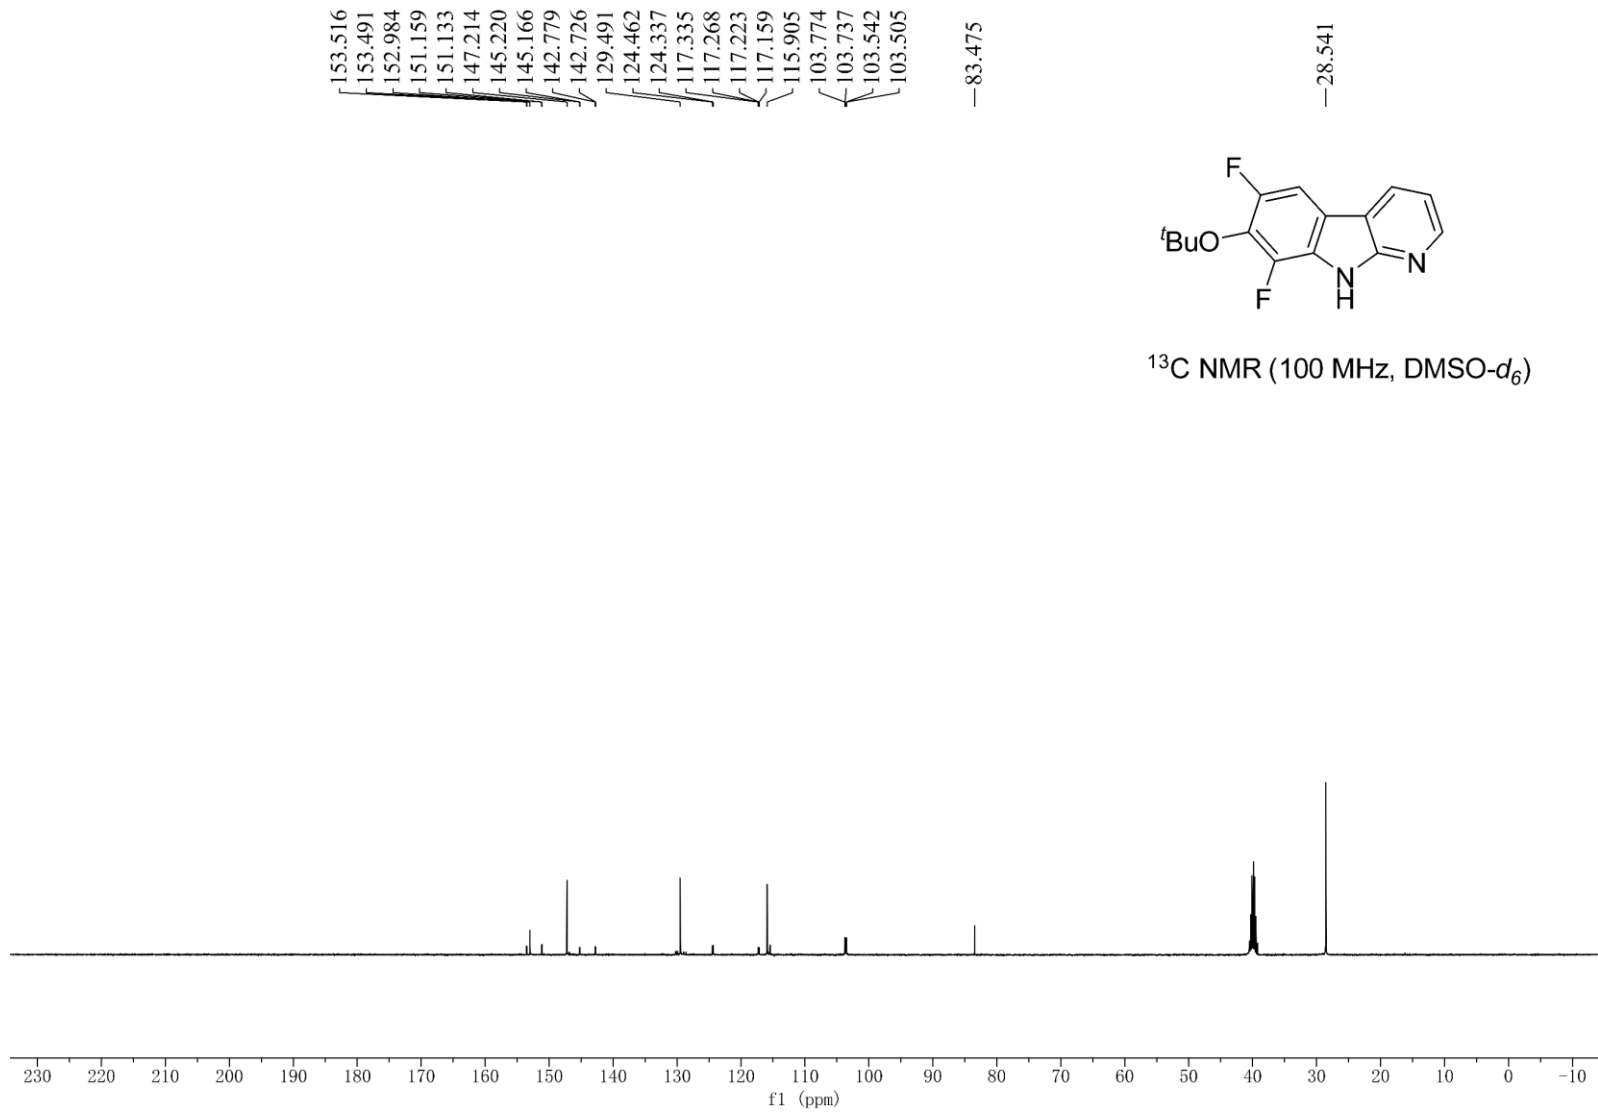

-133.156  
-133.183  
-142.203

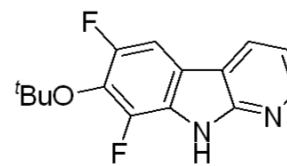

$^{19}\text{F}$  NMR (301 MHz,  $\text{DMSO-}d_6$ )

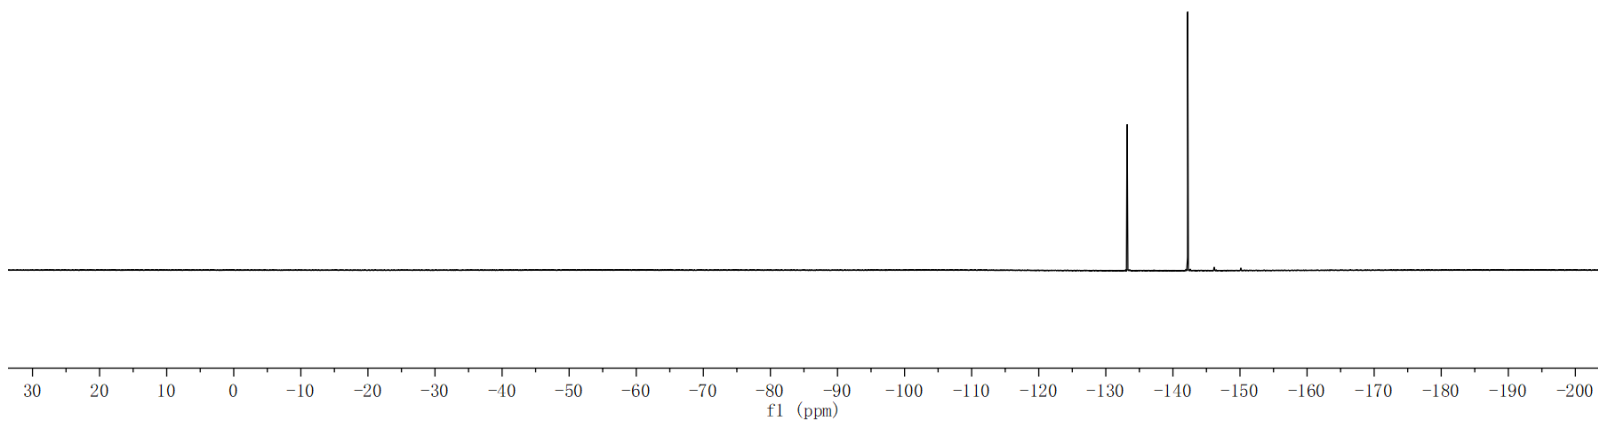

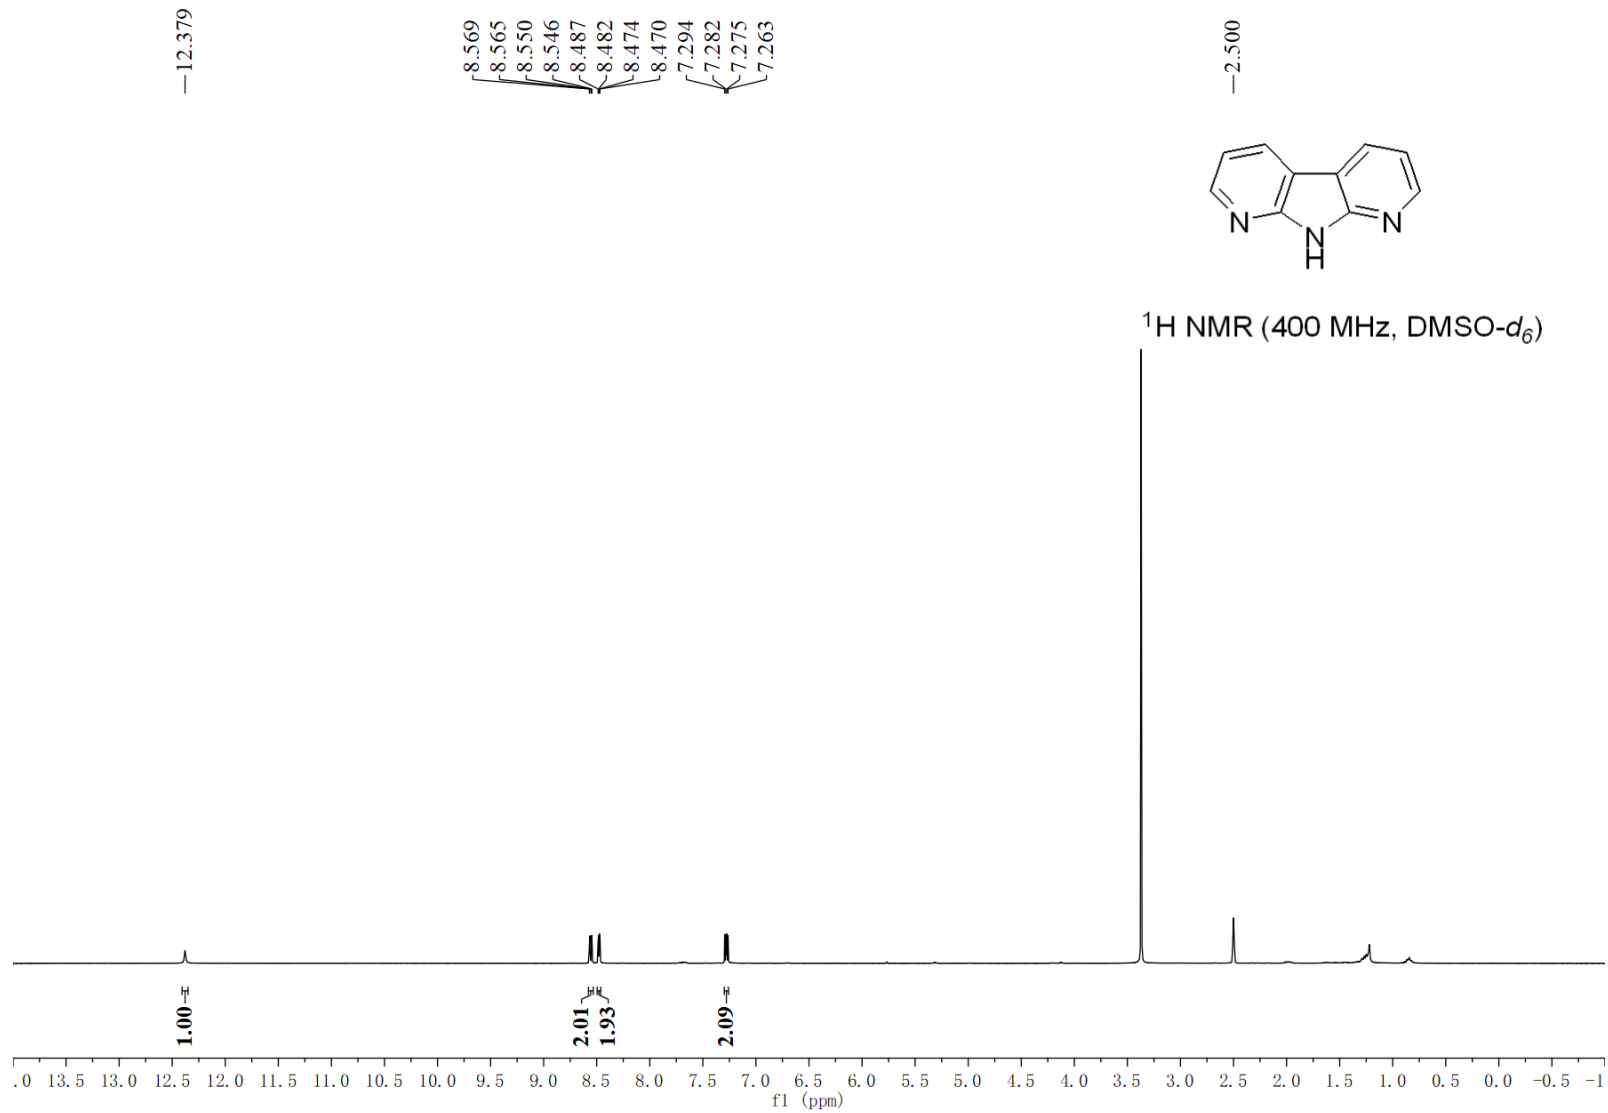

—151.709  
—147.403  
—129.926  
~116.307  
~114.005

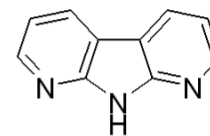

$^{13}\text{C}$  NMR (100 MHz, DMSO- $d_6$ )

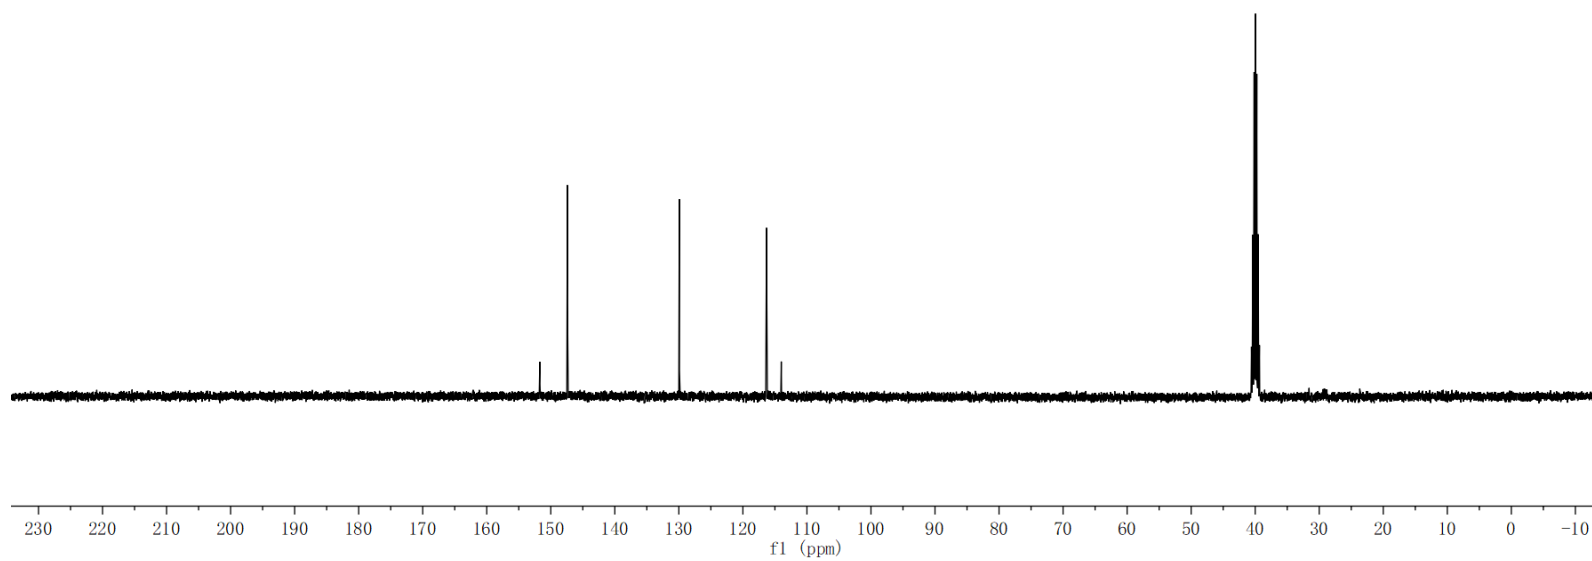

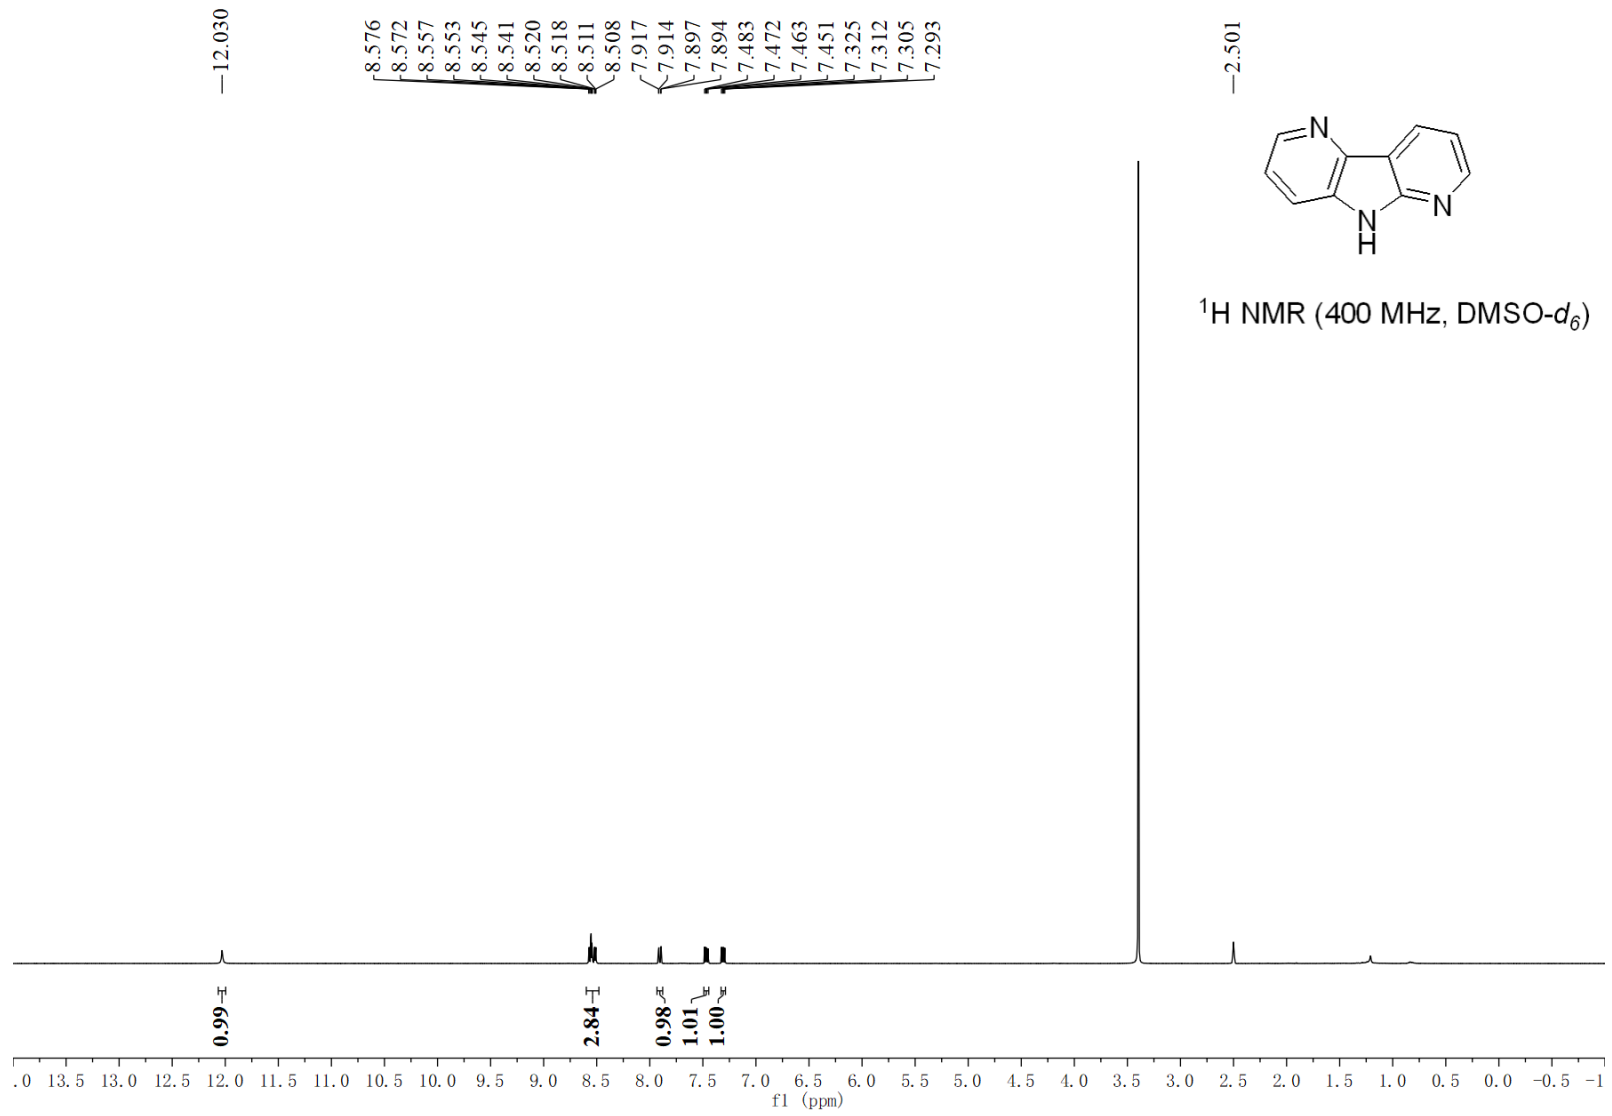



152.507  
148.588  
142.563  
139.468  
132.901  
129.085  
121.725  
118.972  
116.343  
114.689

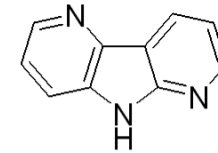

<sup>1</sup>H NMR (400 MHz, DMSO-d<sub>6</sub>)

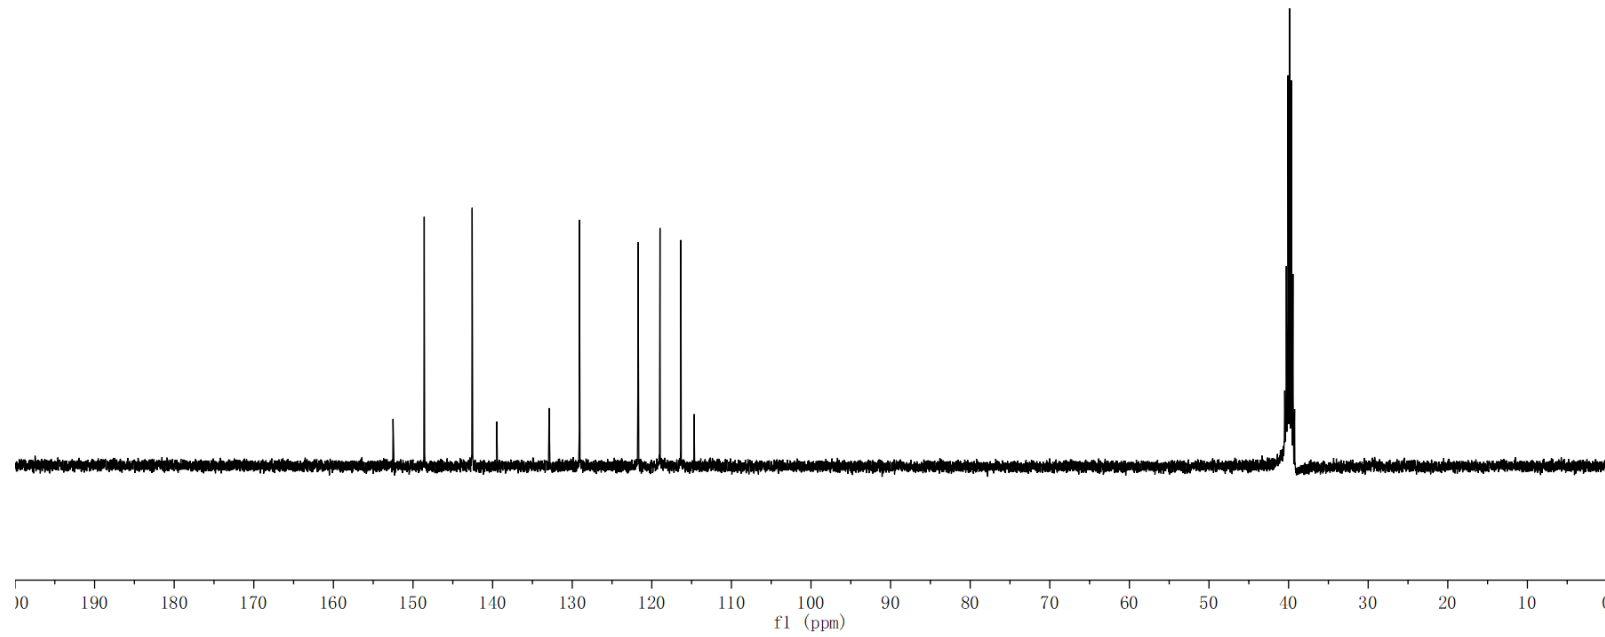

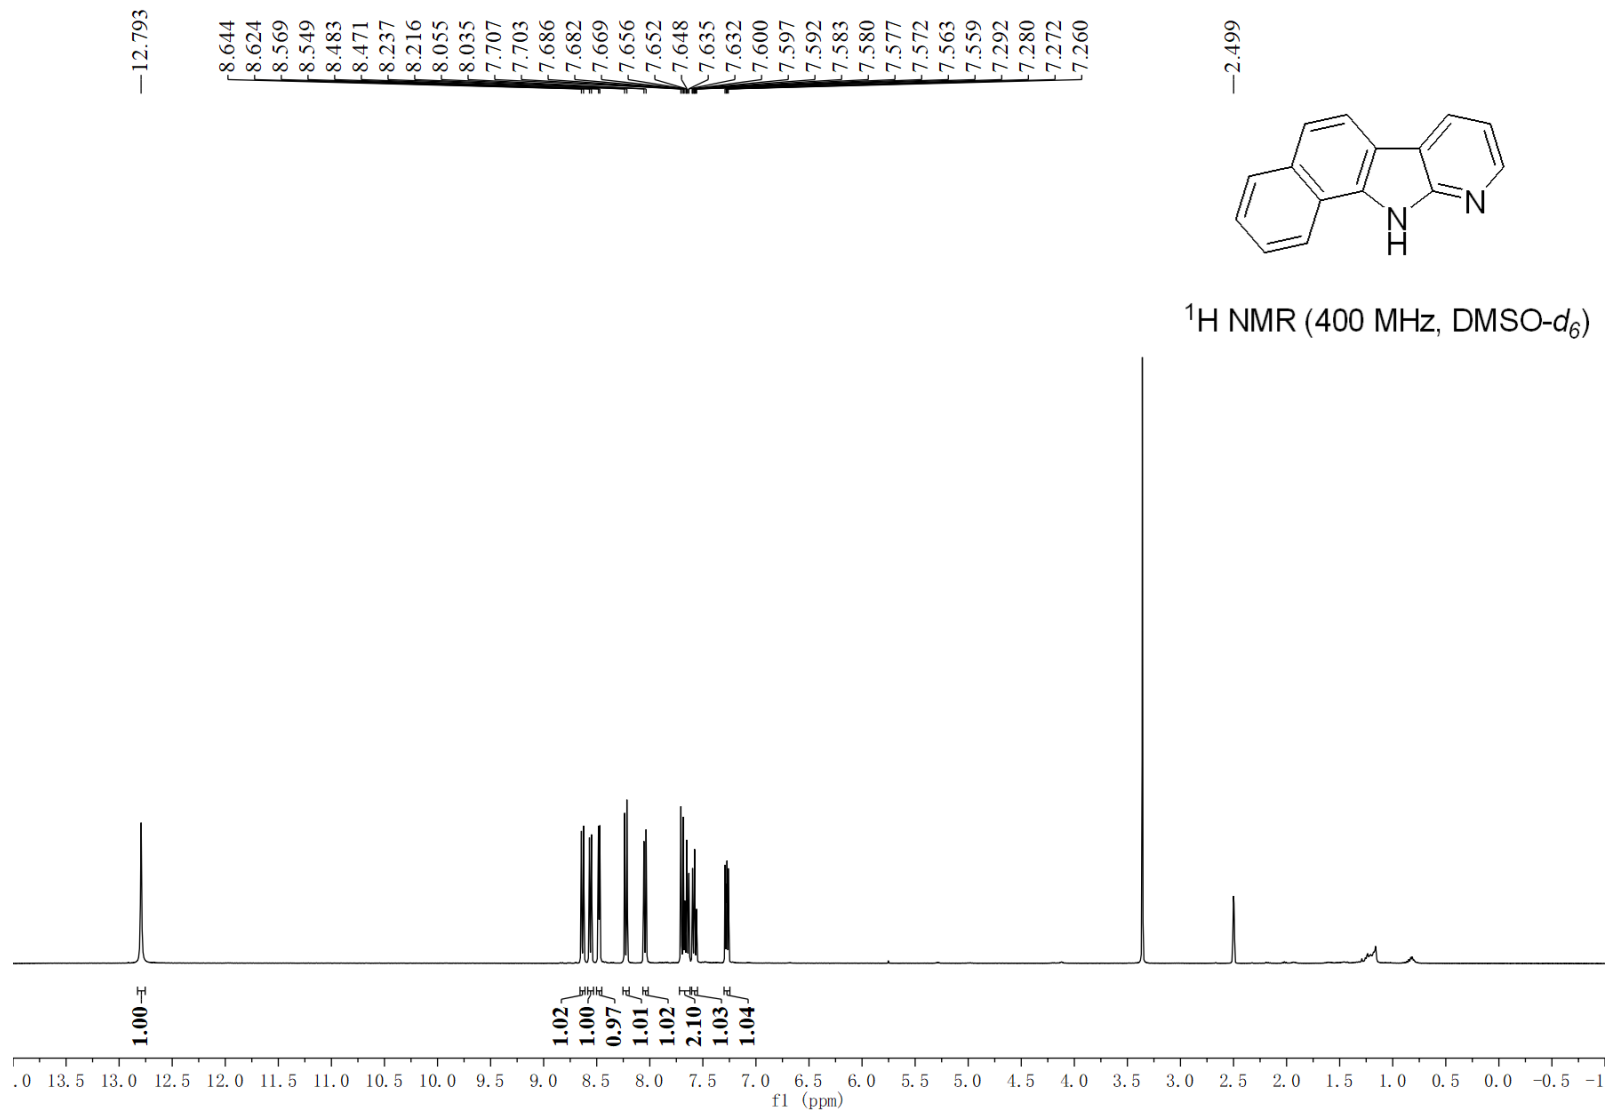

— 151.553  
— 145.696  
— 135.123  
— 132.654  
— 129.017  
— 128.421  
— 126.190  
— 126.167  
— 122.745  
— 121.581  
— 120.425  
— 120.150  
— 116.312  
— 115.995  
— 115.701

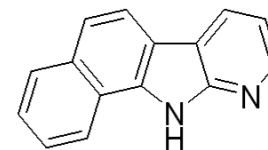

<sup>13</sup>C NMR (100 MHz, DMSO-d<sub>6</sub>)

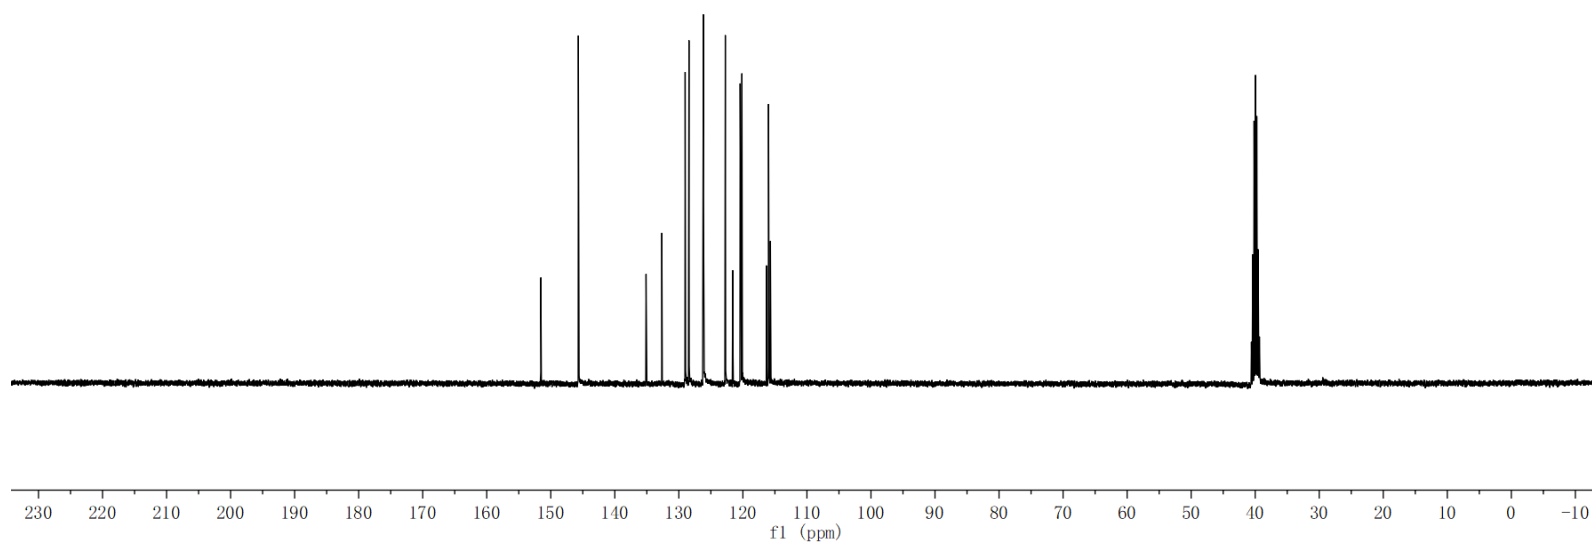

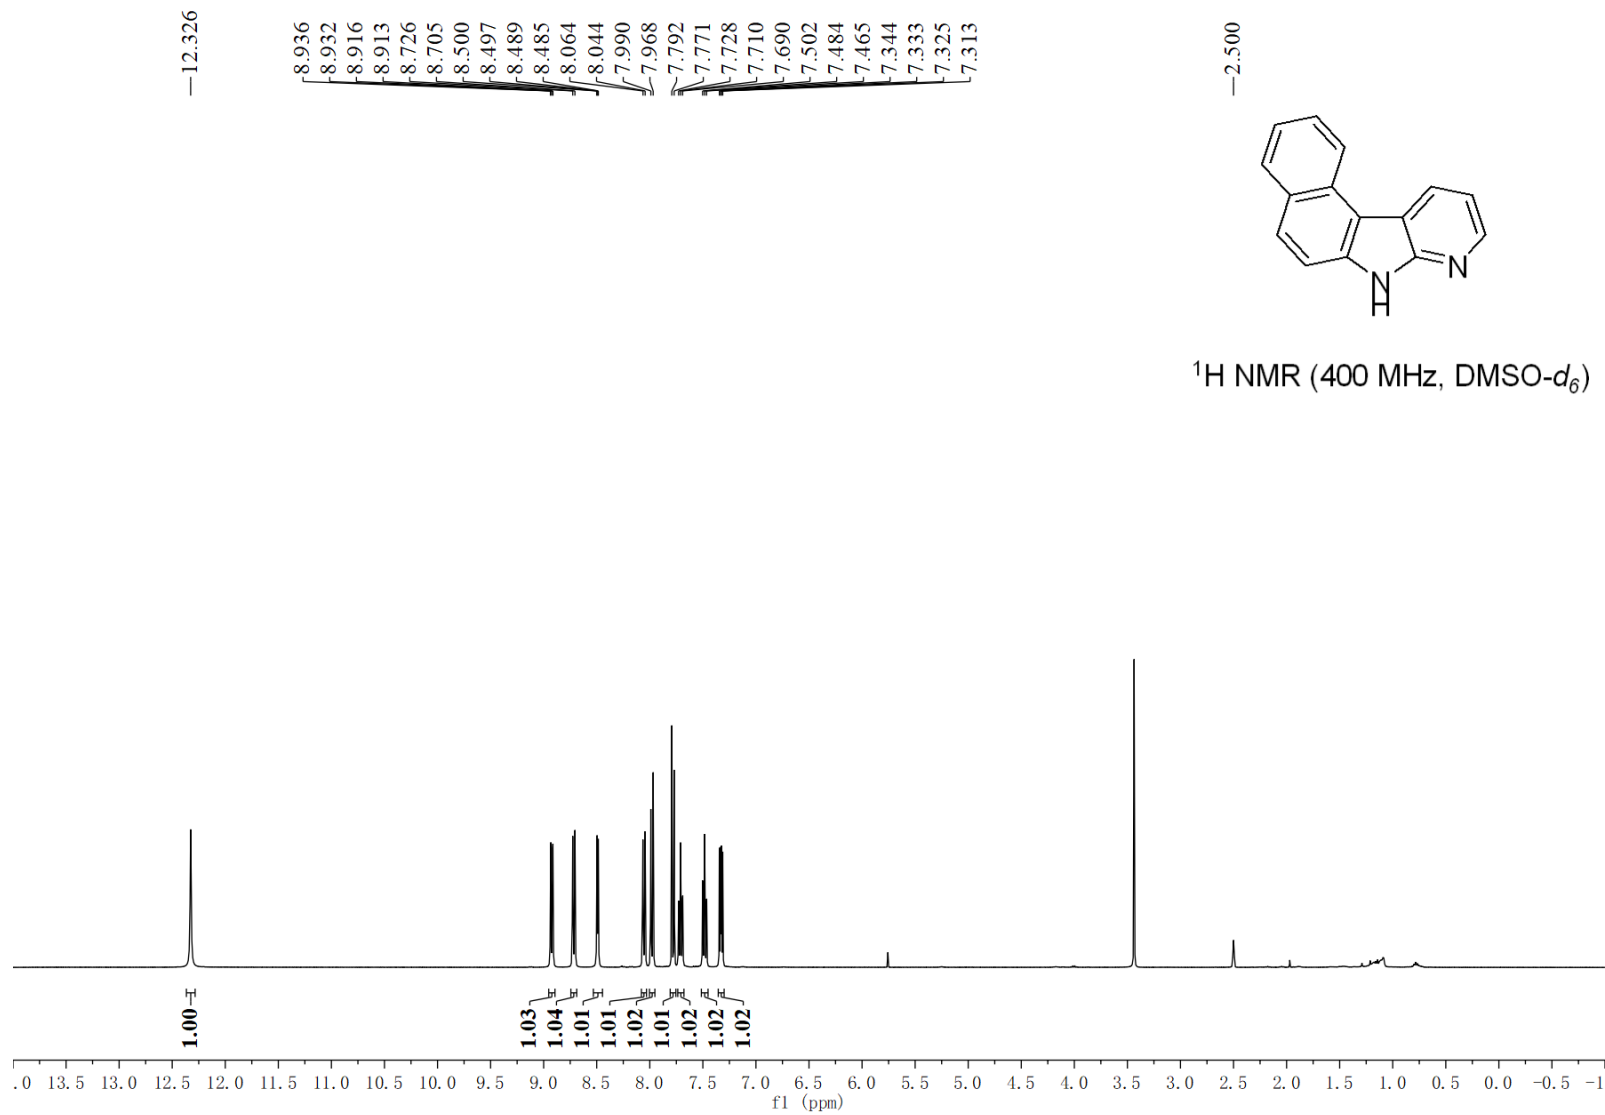

151.034  
145.154  
137.305  
129.898  
129.787  
129.726  
129.065  
128.421  
127.651  
123.571  
123.340  
116.169  
116.006  
113.770  
112.810

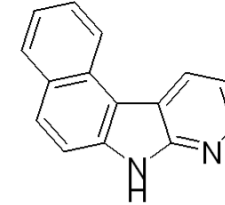

$^{13}\text{C}$  NMR (100 MHz,  $\text{DMSO-}d_6$ )

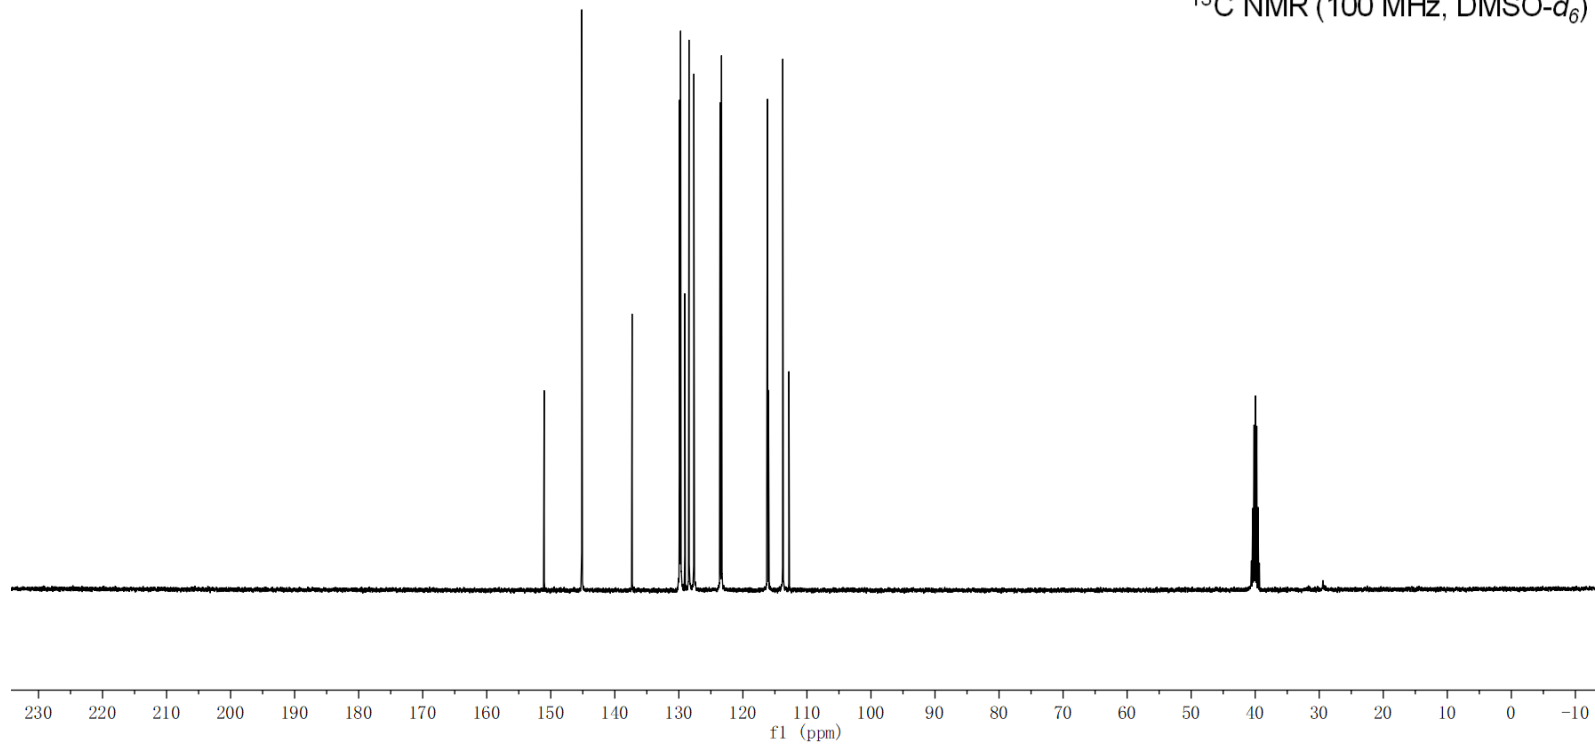

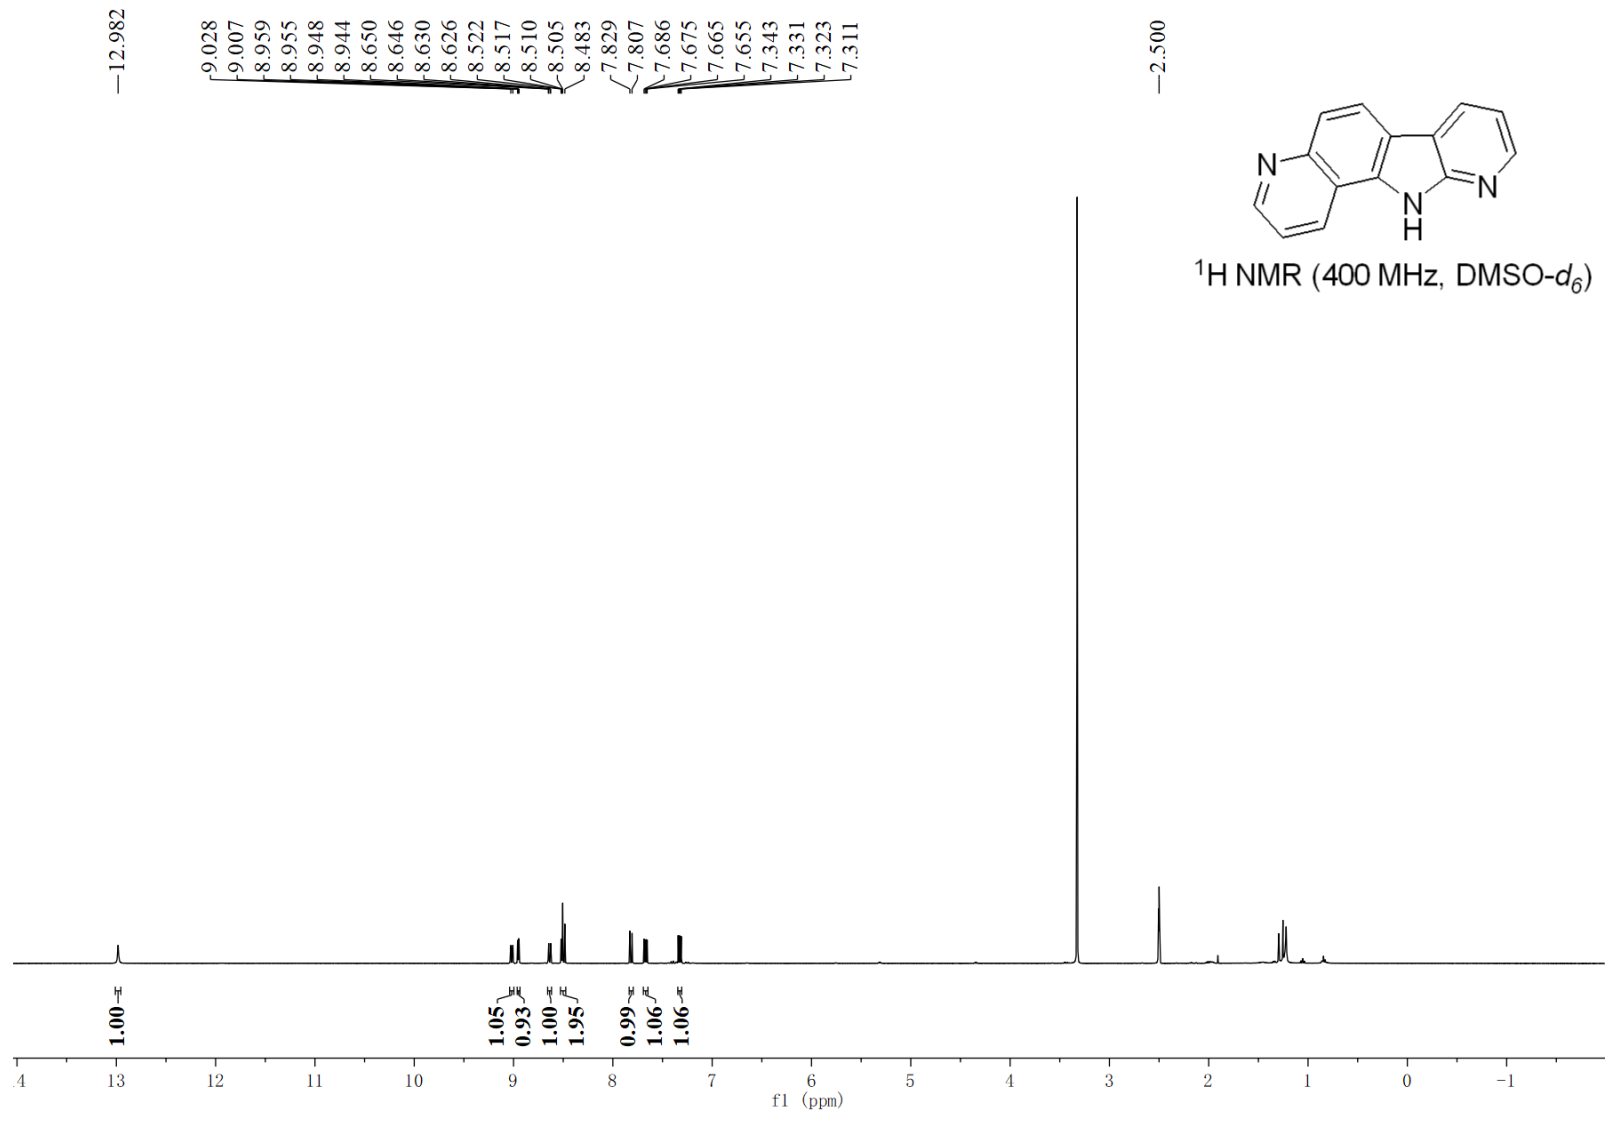

151.775  
149.970  
147.794  
146.173  
134.487  
130.925  
128.938  
123.744  
121.449  
121.271  
116.764  
116.357  
115.917  
115.823

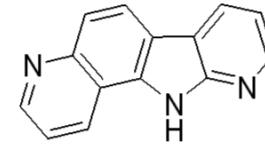

$^{13}\text{C}$  NMR (100 MHz,  $\text{DMSO-}d_6$ )

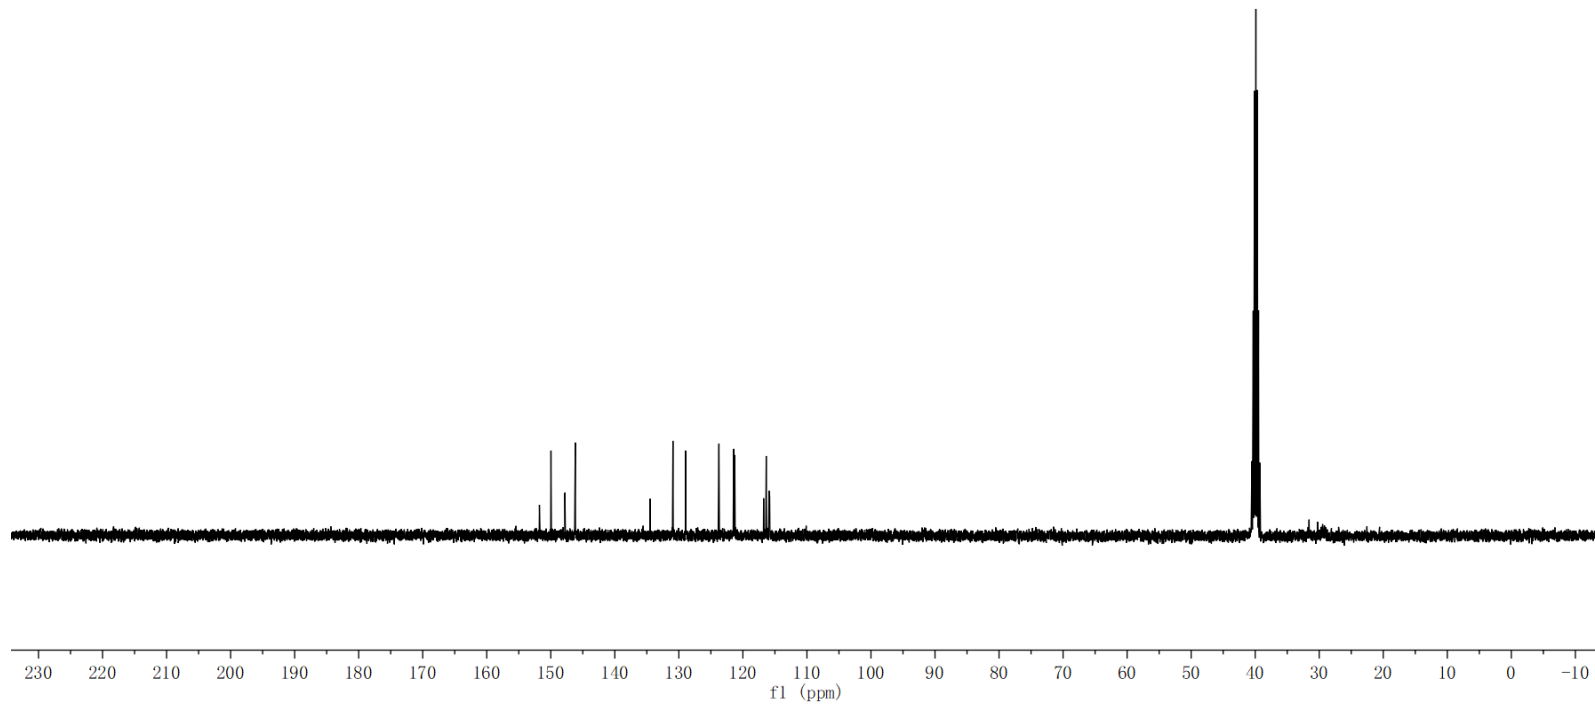

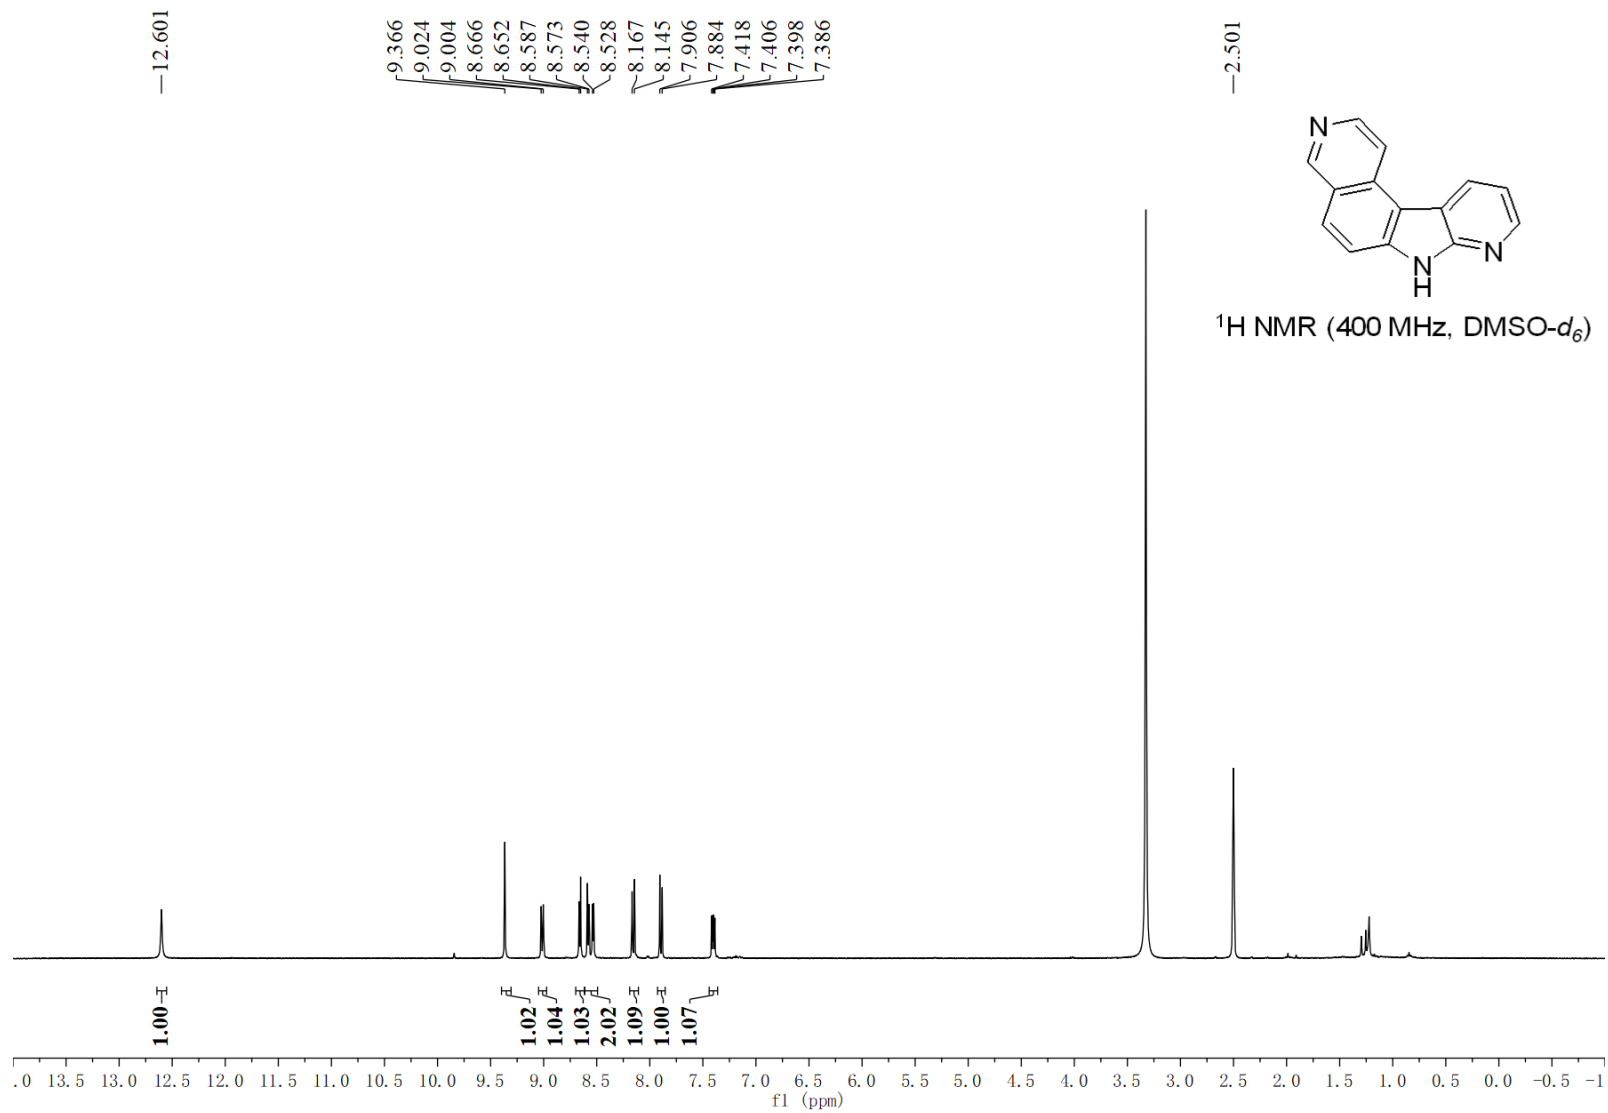



152.885  
151.129  
145.932  
144.798  
139.570  
132.491  
130.185  
127.699  
124.344  
116.925  
116.771  
115.793  
115.227  
111.380

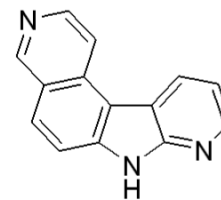

<sup>13</sup>C NMR (100 MHz, DMSO-d<sub>6</sub>)

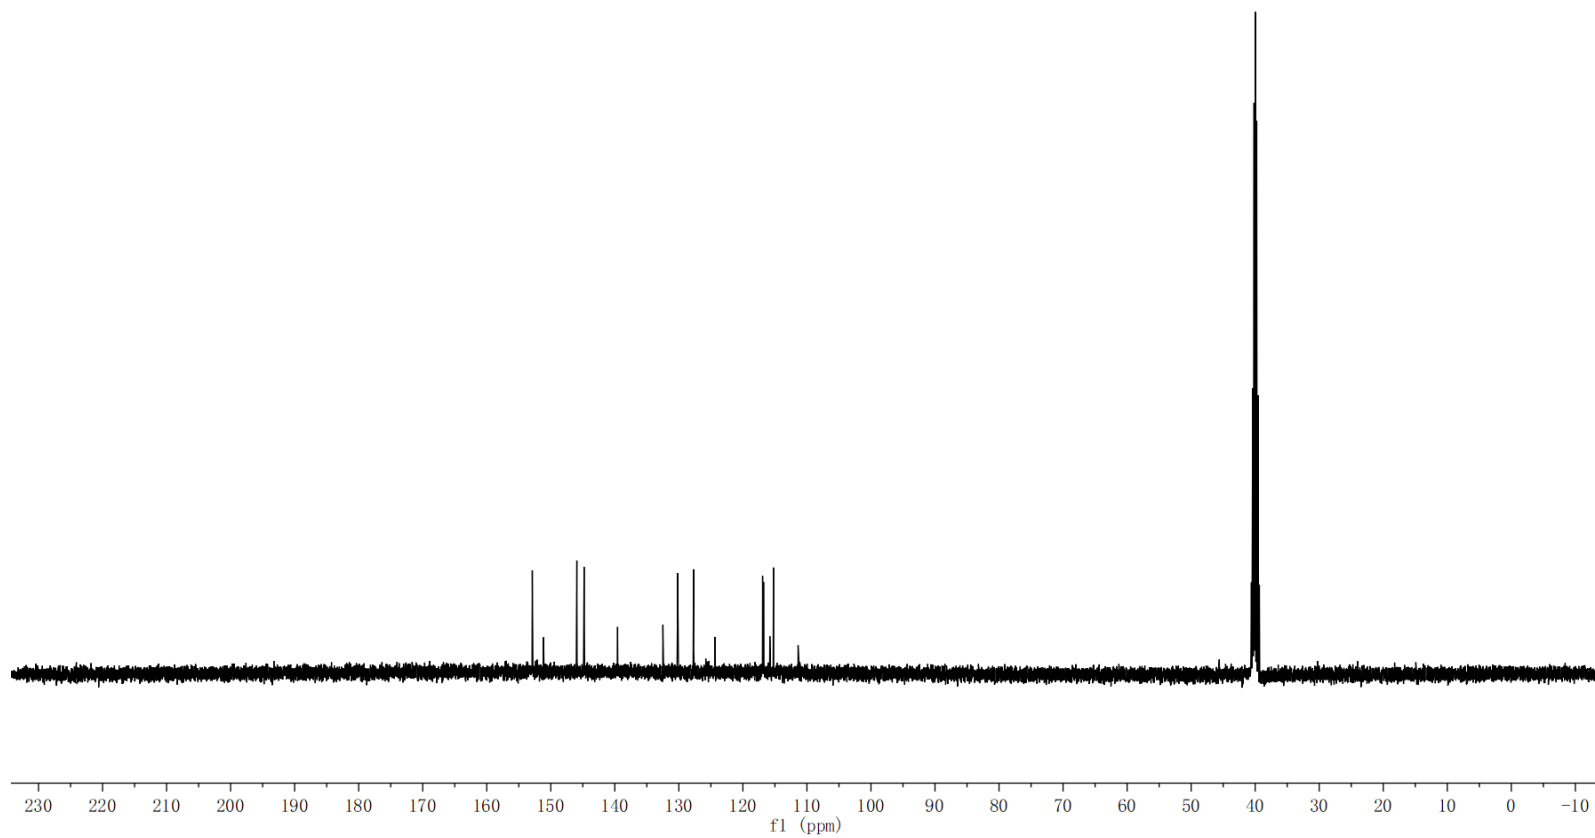

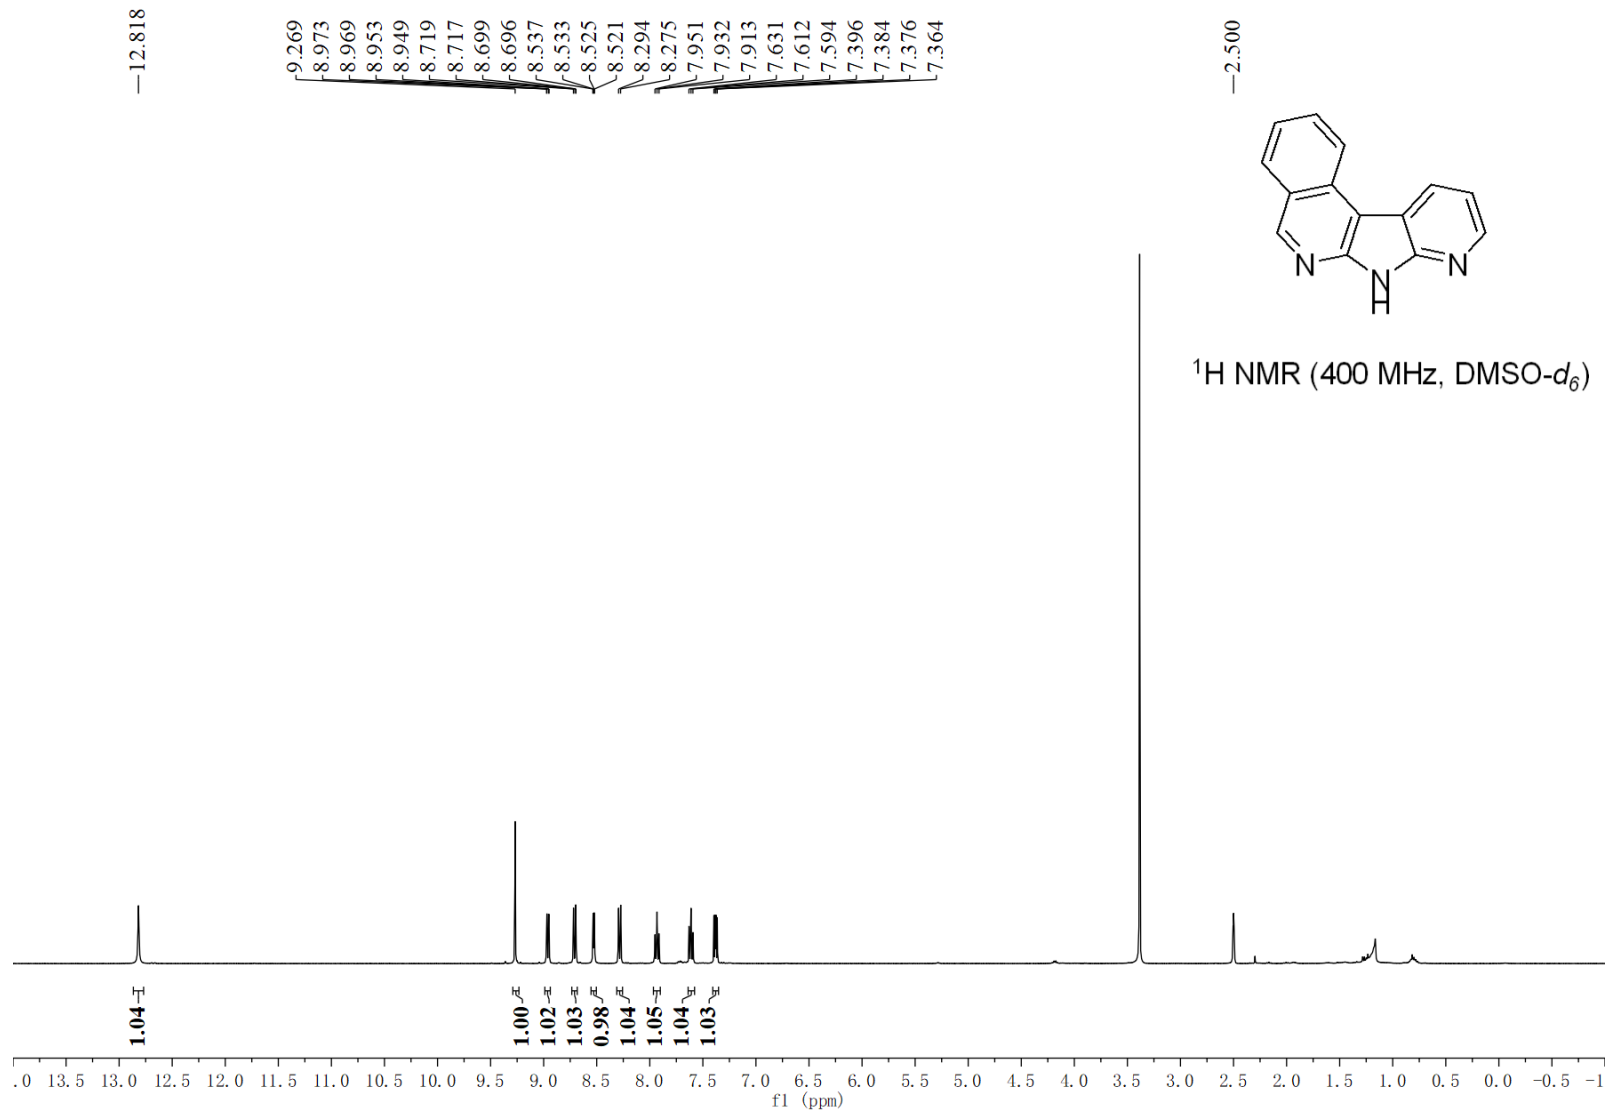

151.998  
149.813  
147.760  
145.926  
132.276  
132.053  
130.616  
130.002  
124.806  
124.548  
122.875  
116.739  
114.498  
104.245

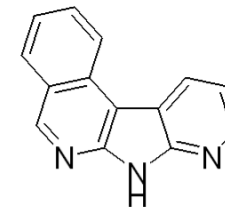

<sup>13</sup>C NMR (100 MHz, DMSO-d<sub>6</sub>)

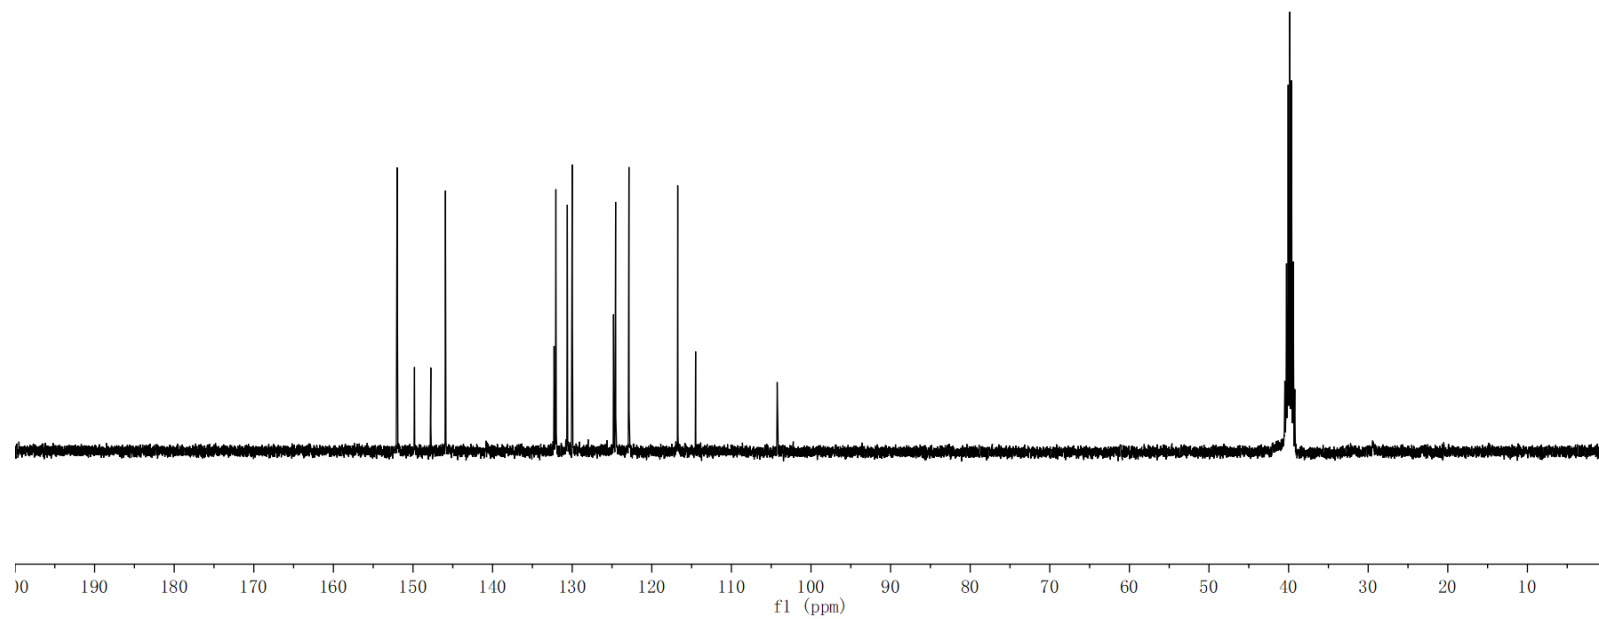

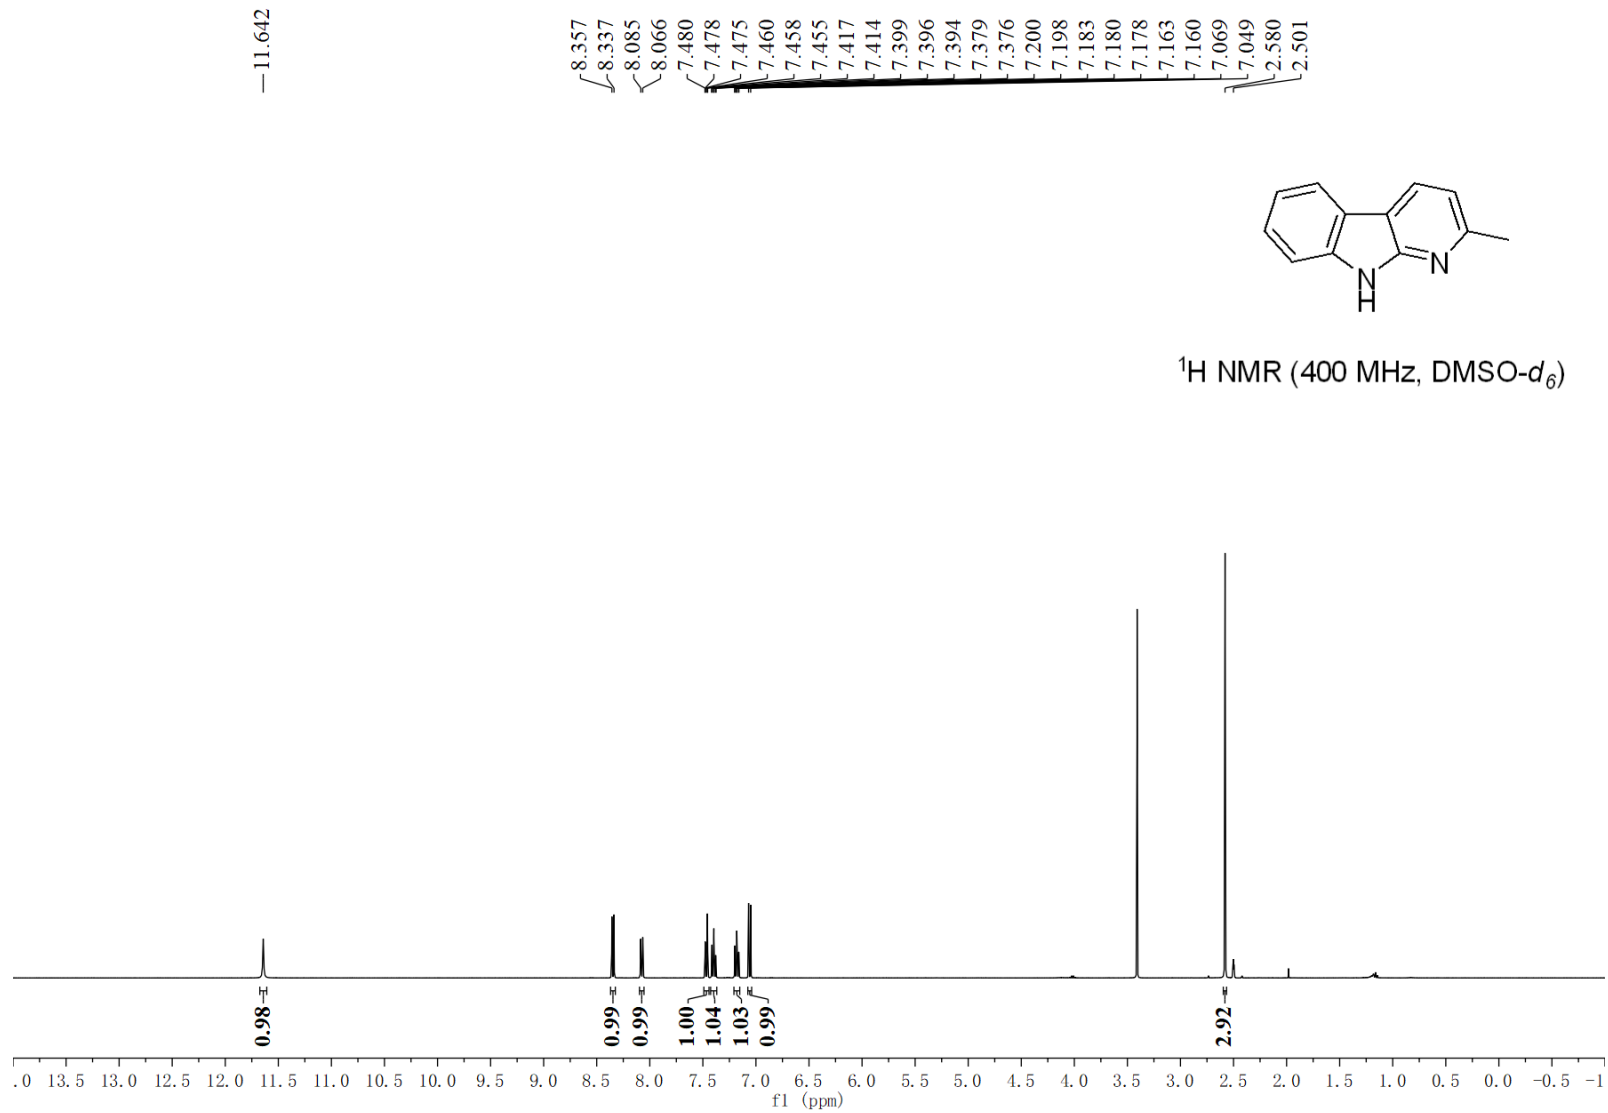

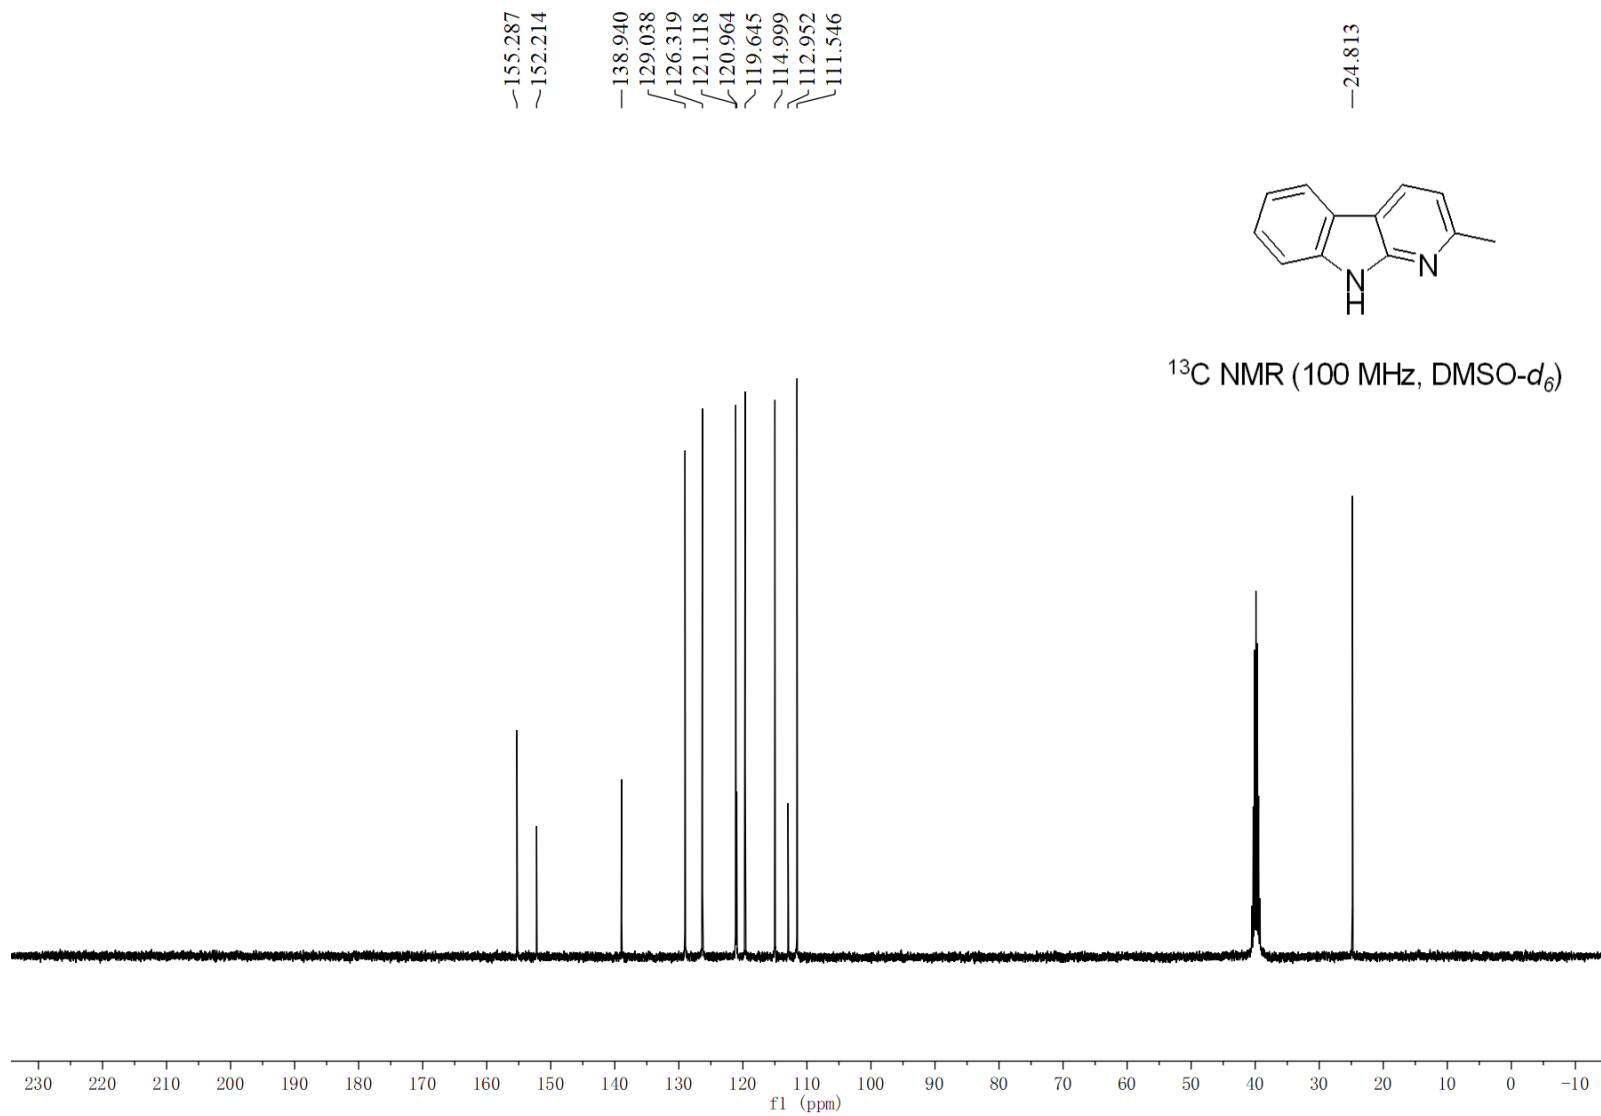

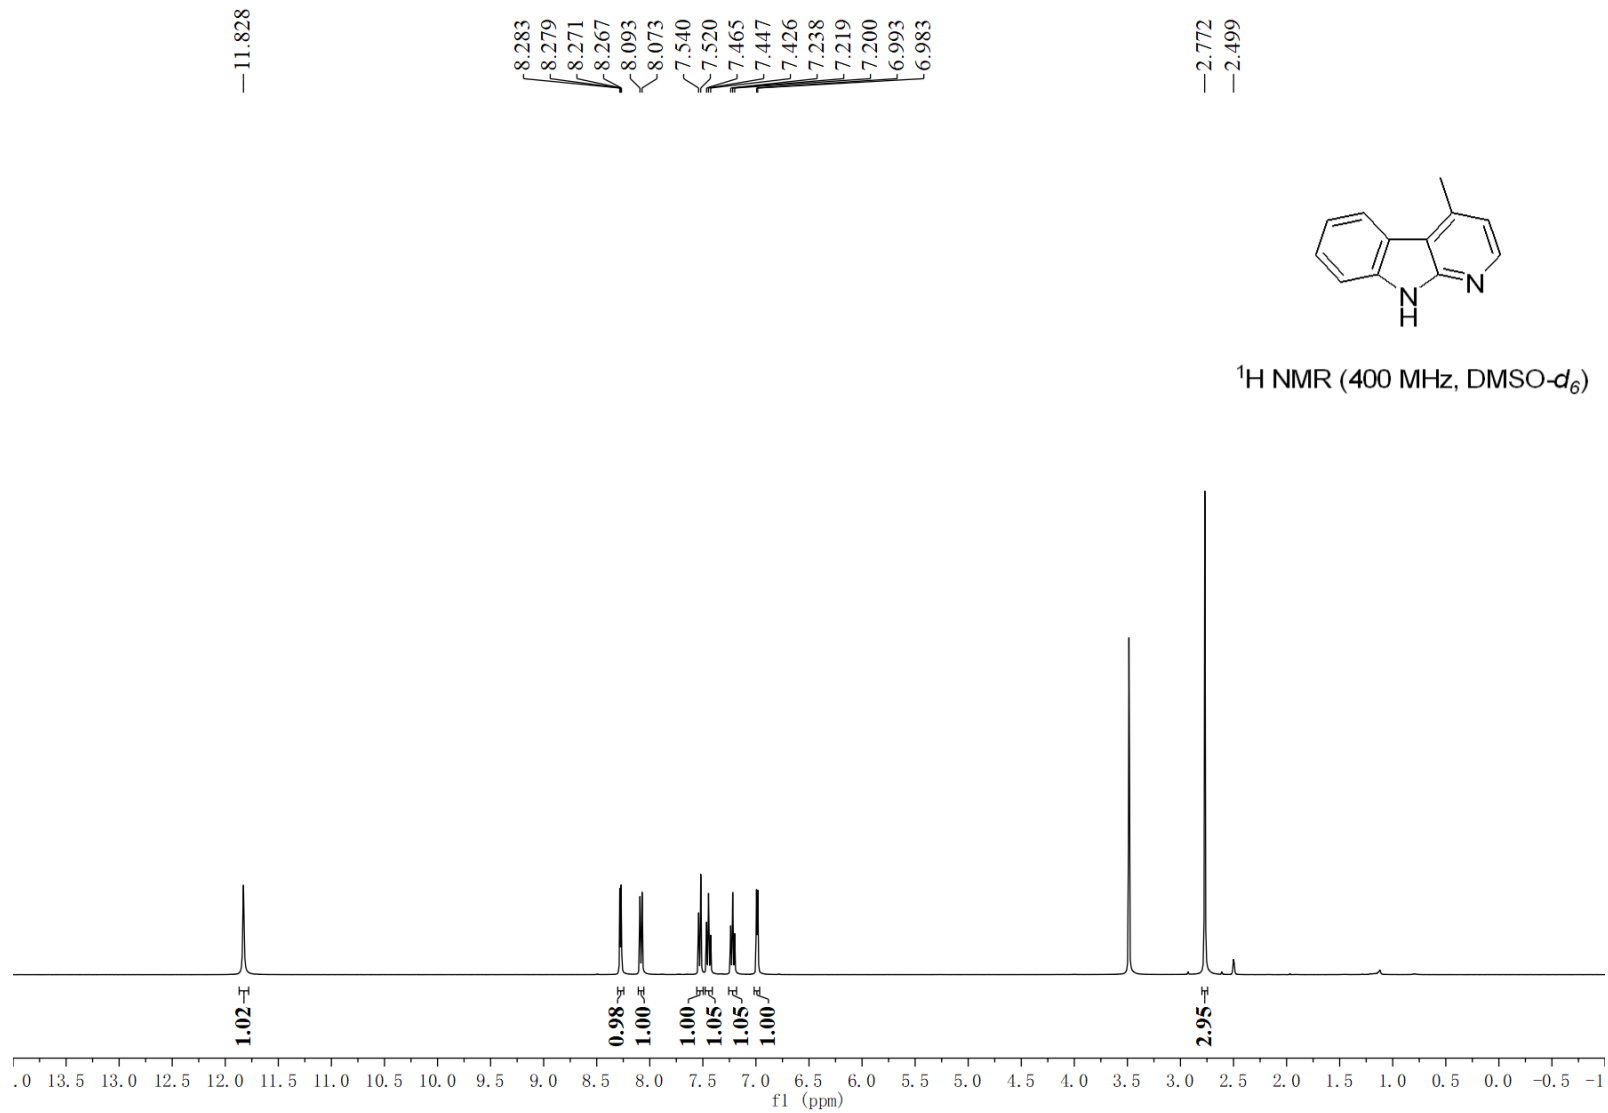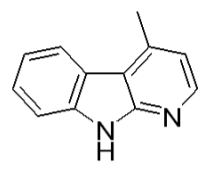

<sup>1</sup>H NMR (400 MHz, DMSO-d<sub>6</sub>)

152.216  
146.213  
142.058  
138.997  
126.361  
123.143  
121.237  
119.839  
117.166  
114.398  
111.498

19.955

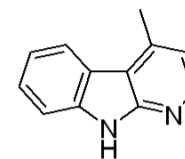

<sup>13</sup>C NMR (100 MHz, DMSO-d<sub>6</sub>)

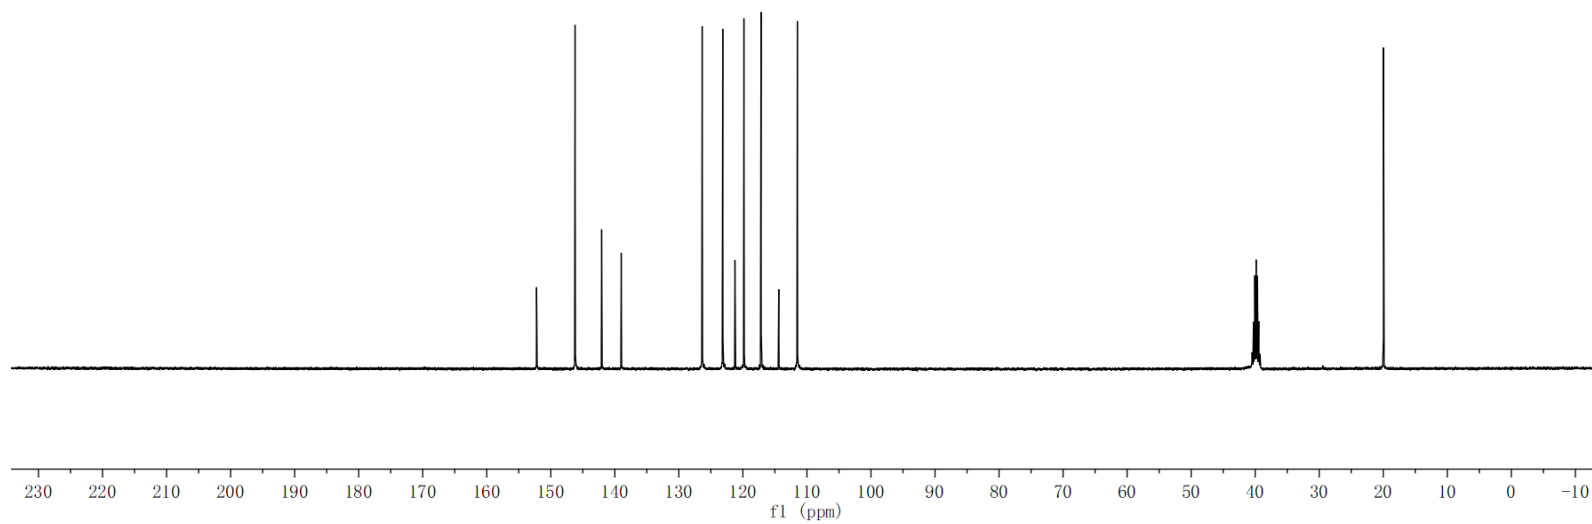

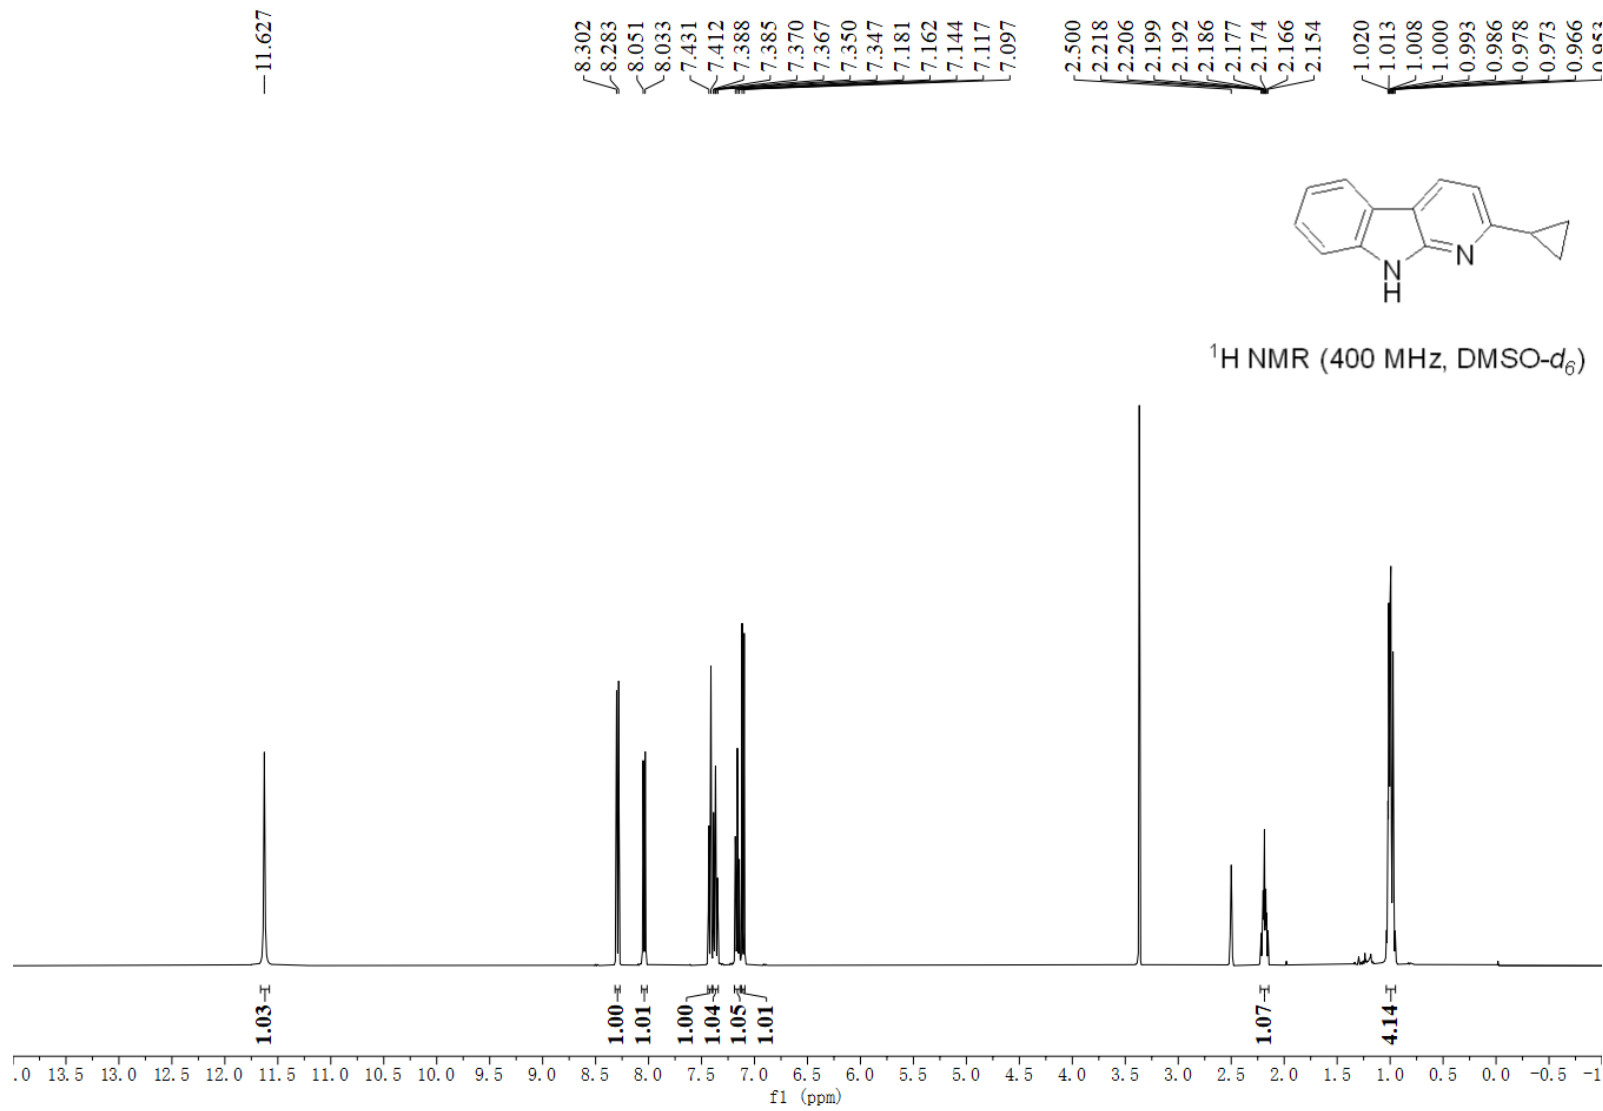



— 159.953  
— 152.583  
— 138.937  
/ 128.705  
/ 126.123  
/ 121.109  
/ 120.938  
/ 119.632  
/ 113.676  
/ 113.092  
/ 111.423

— 17.613  
— 10.496

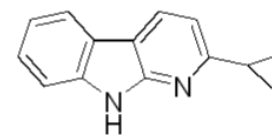

<sup>13</sup>C NMR (101 MHz, DMSO-d<sub>6</sub>)

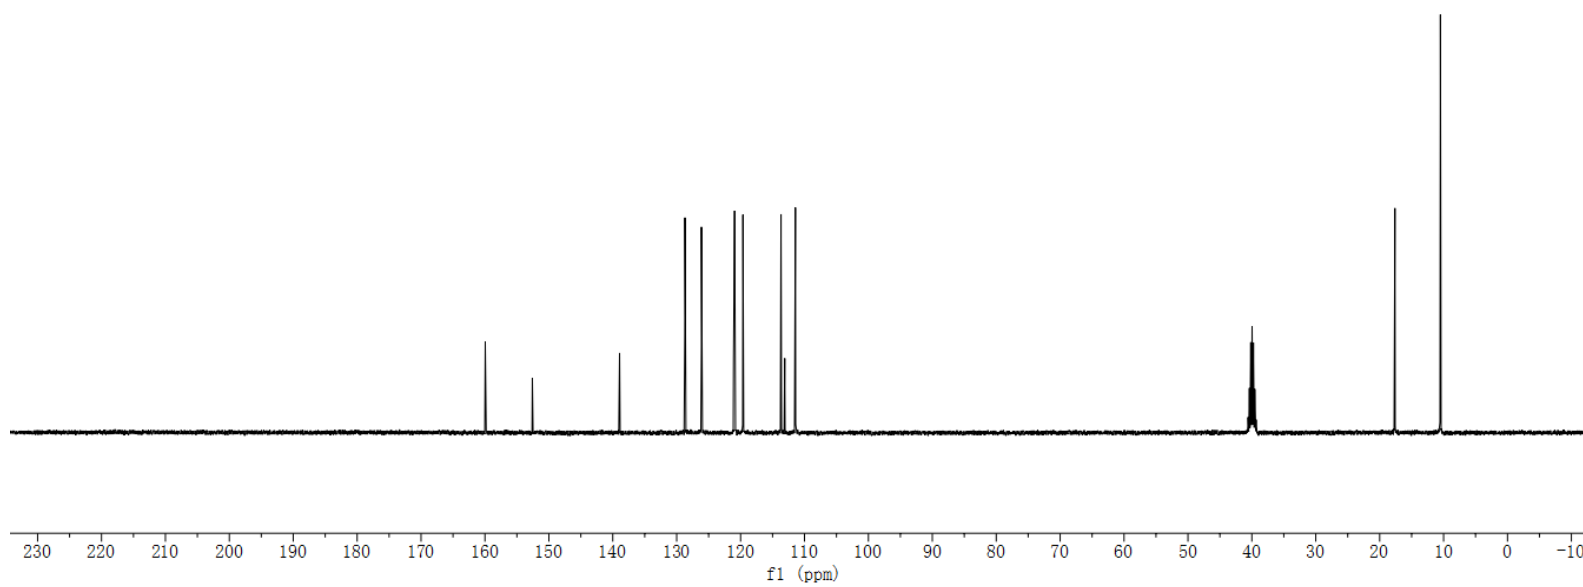

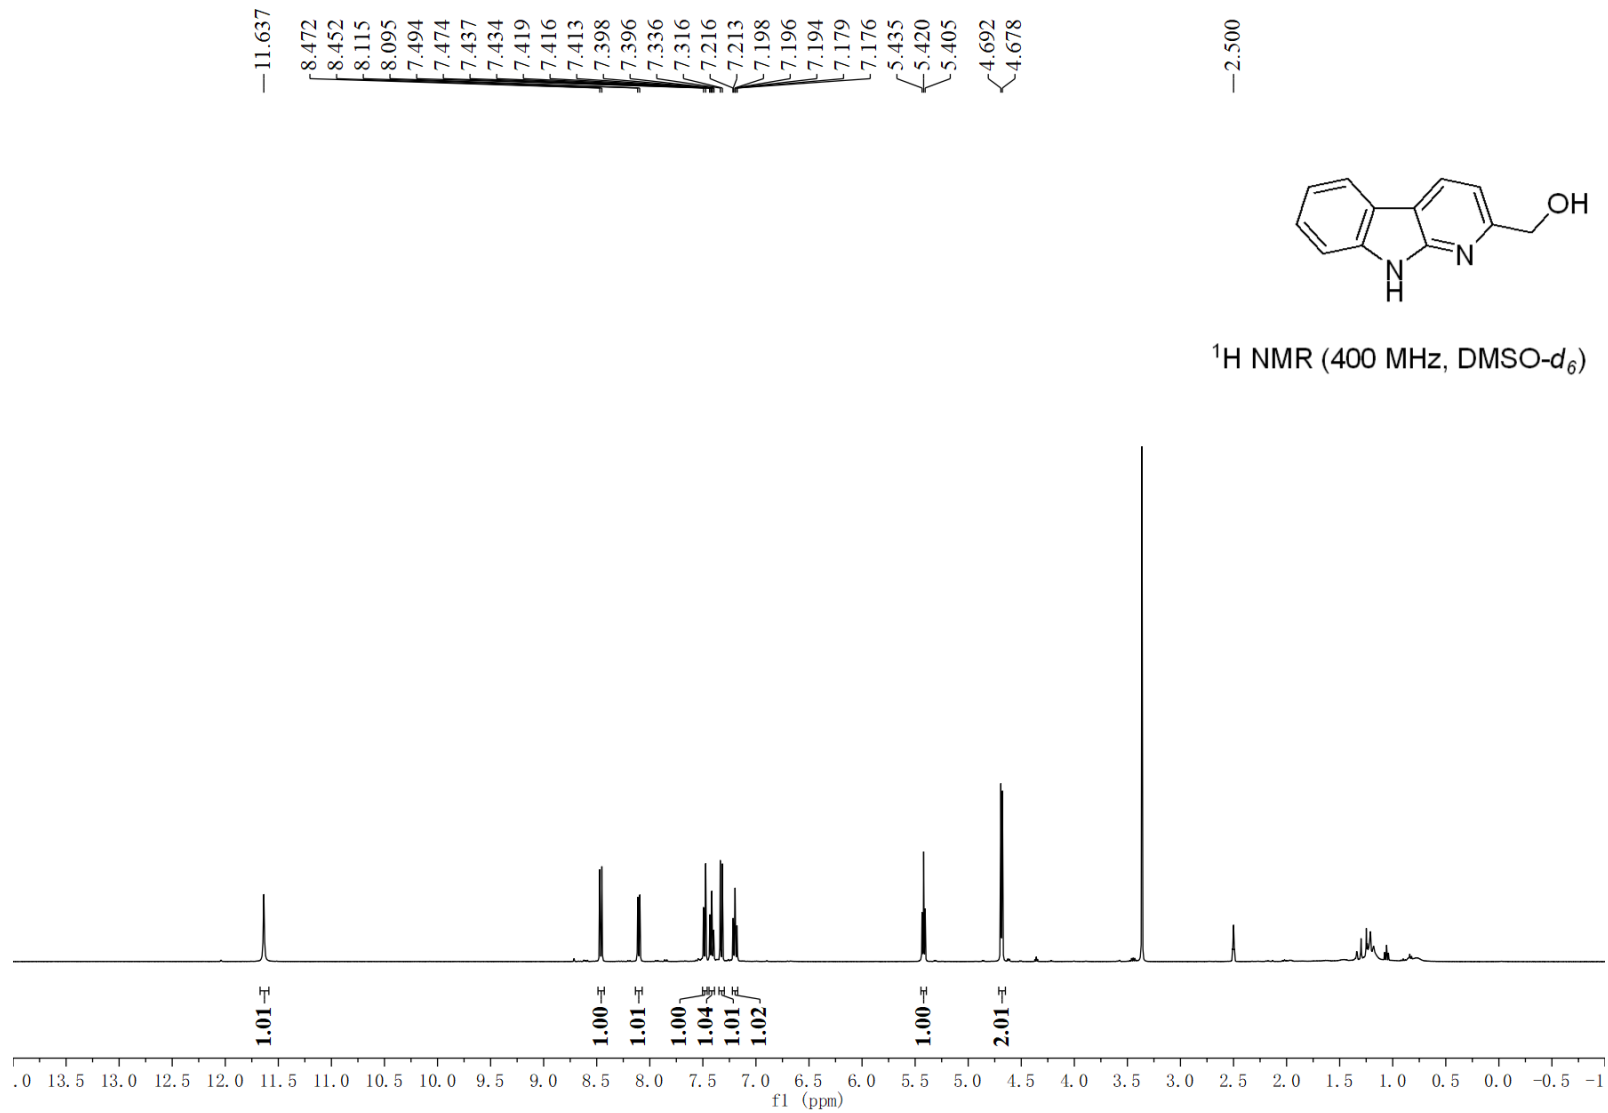

—159.410  
—151.809  
—139.236  
129.131  
126.565  
121.263  
120.903  
119.715  
114.157  
112.147  
111.596  
—65.194

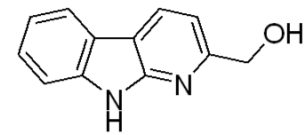

<sup>13</sup>C NMR (100 MHz, DMSO-d<sub>6</sub>)

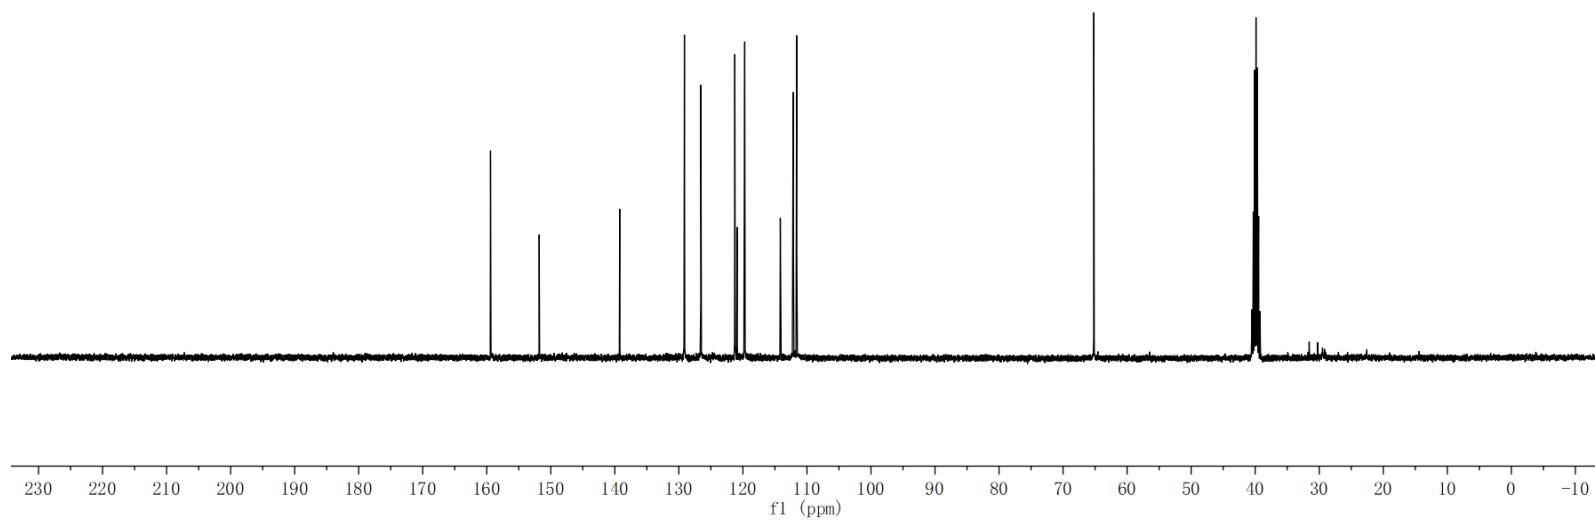

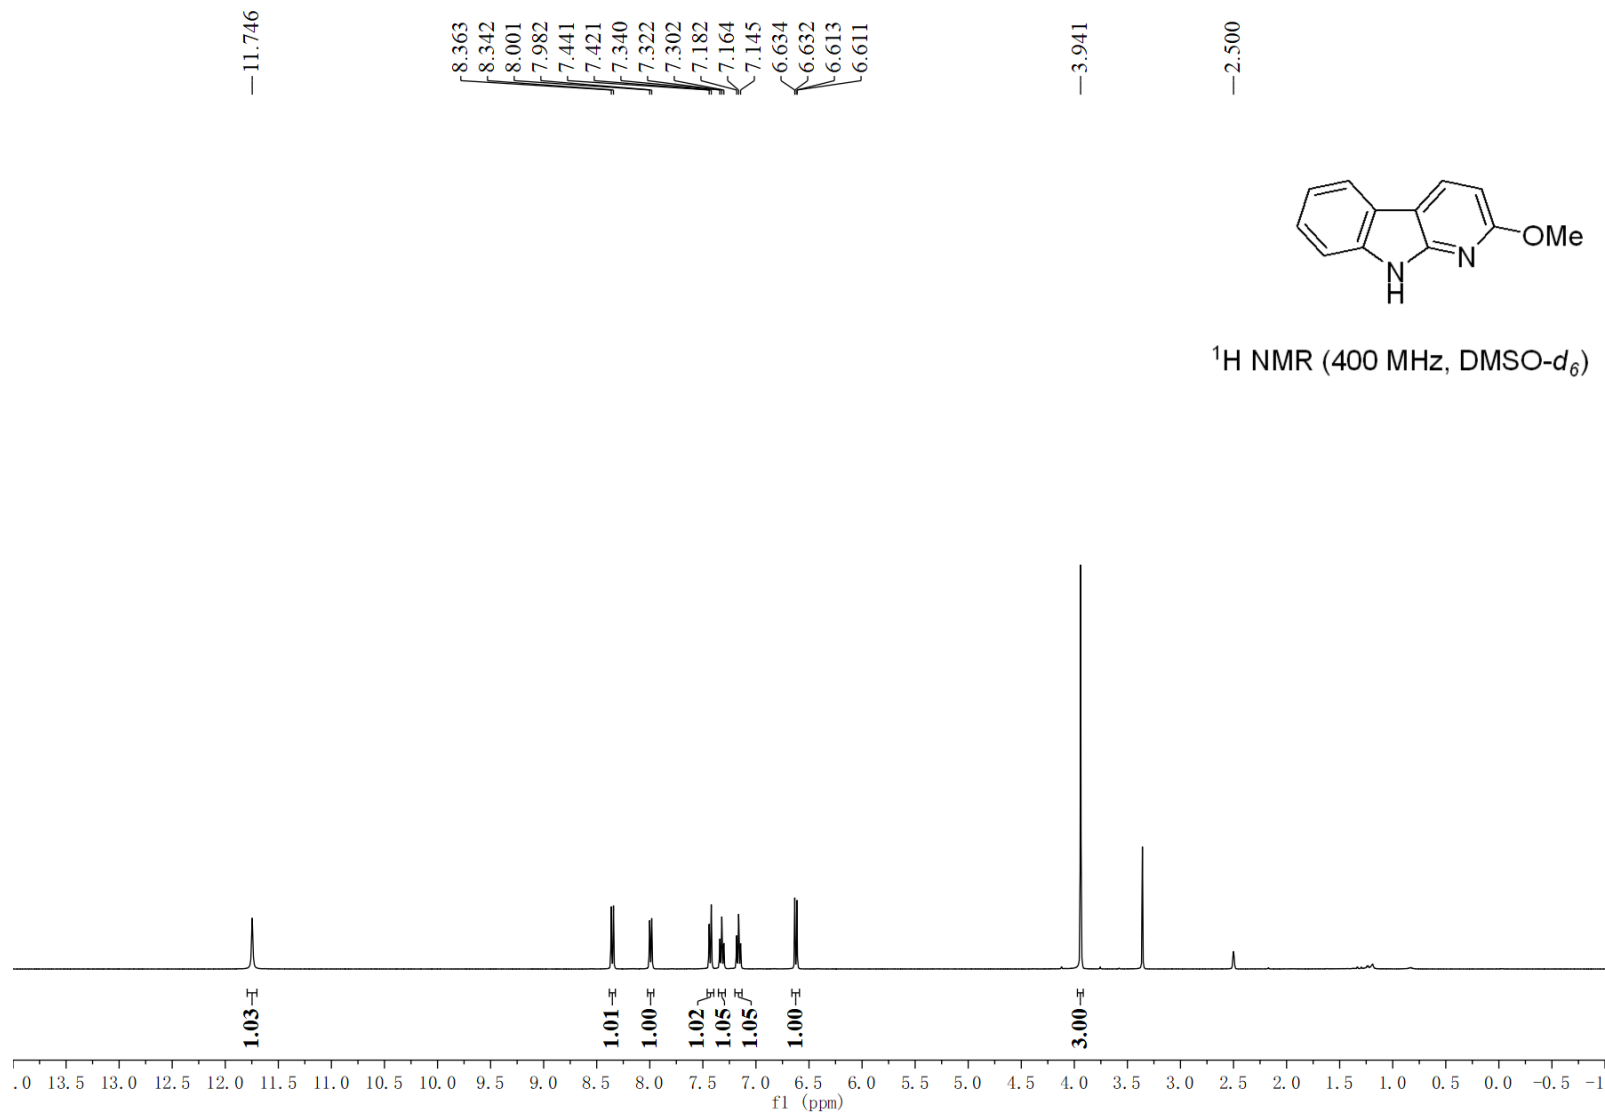

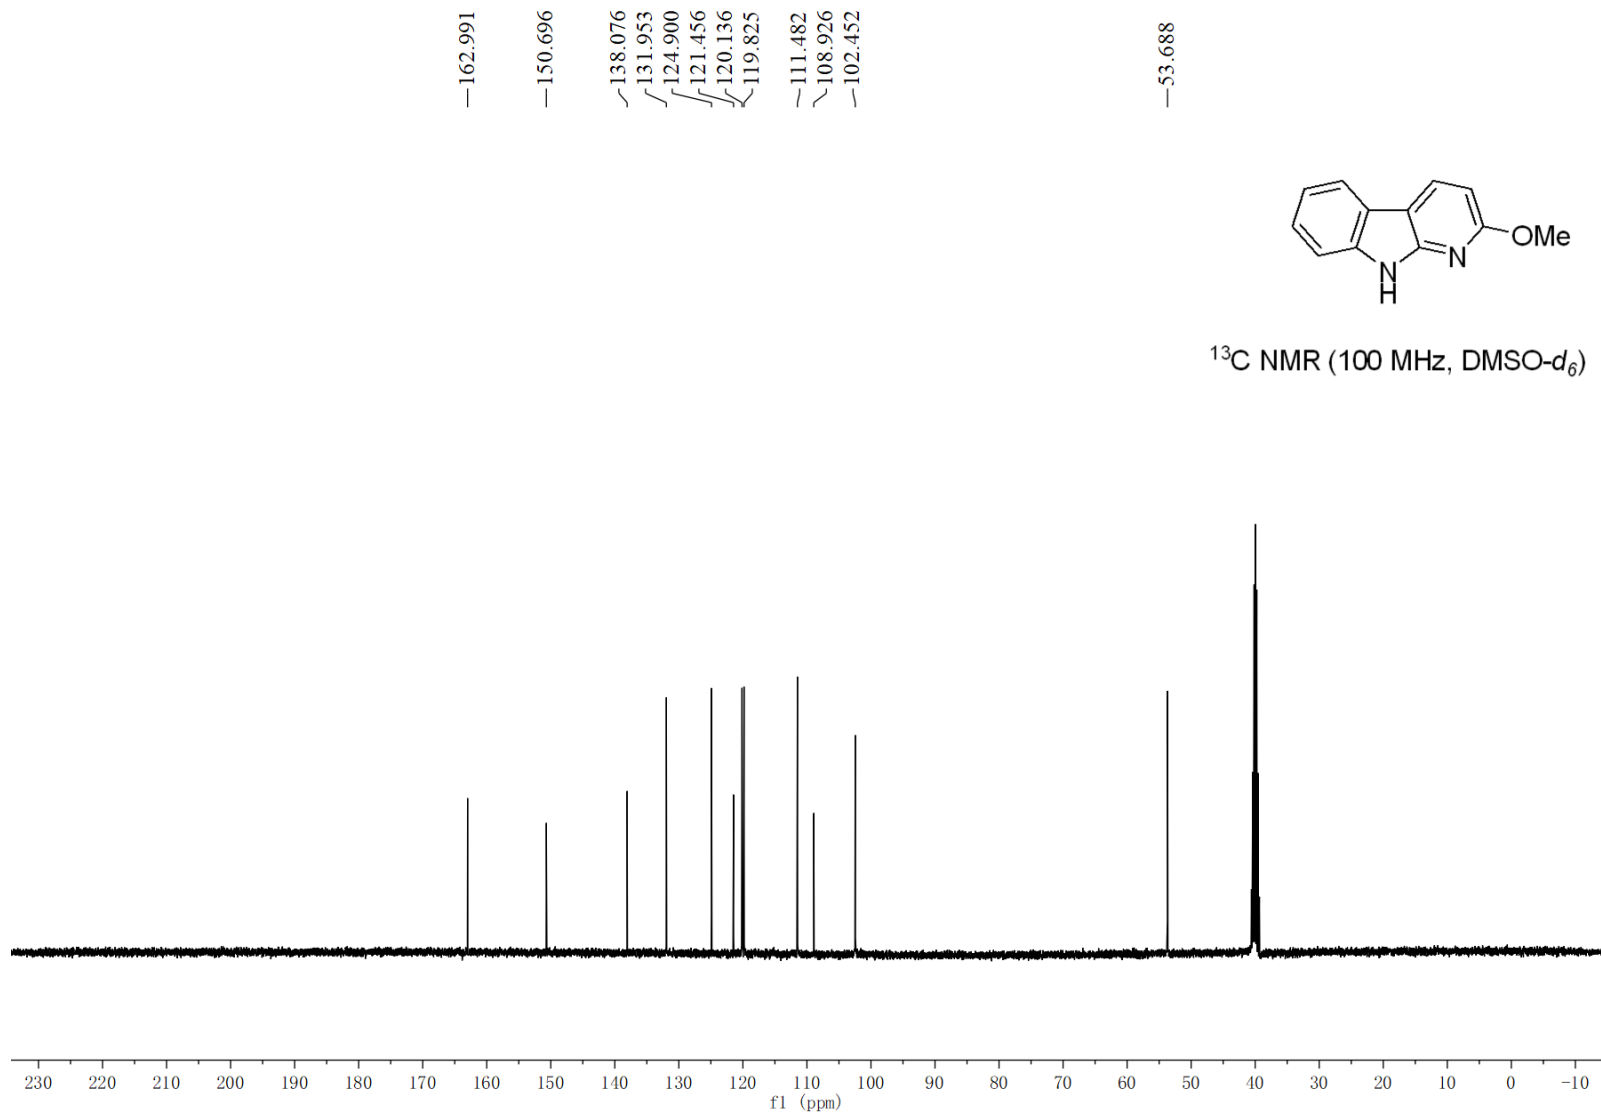

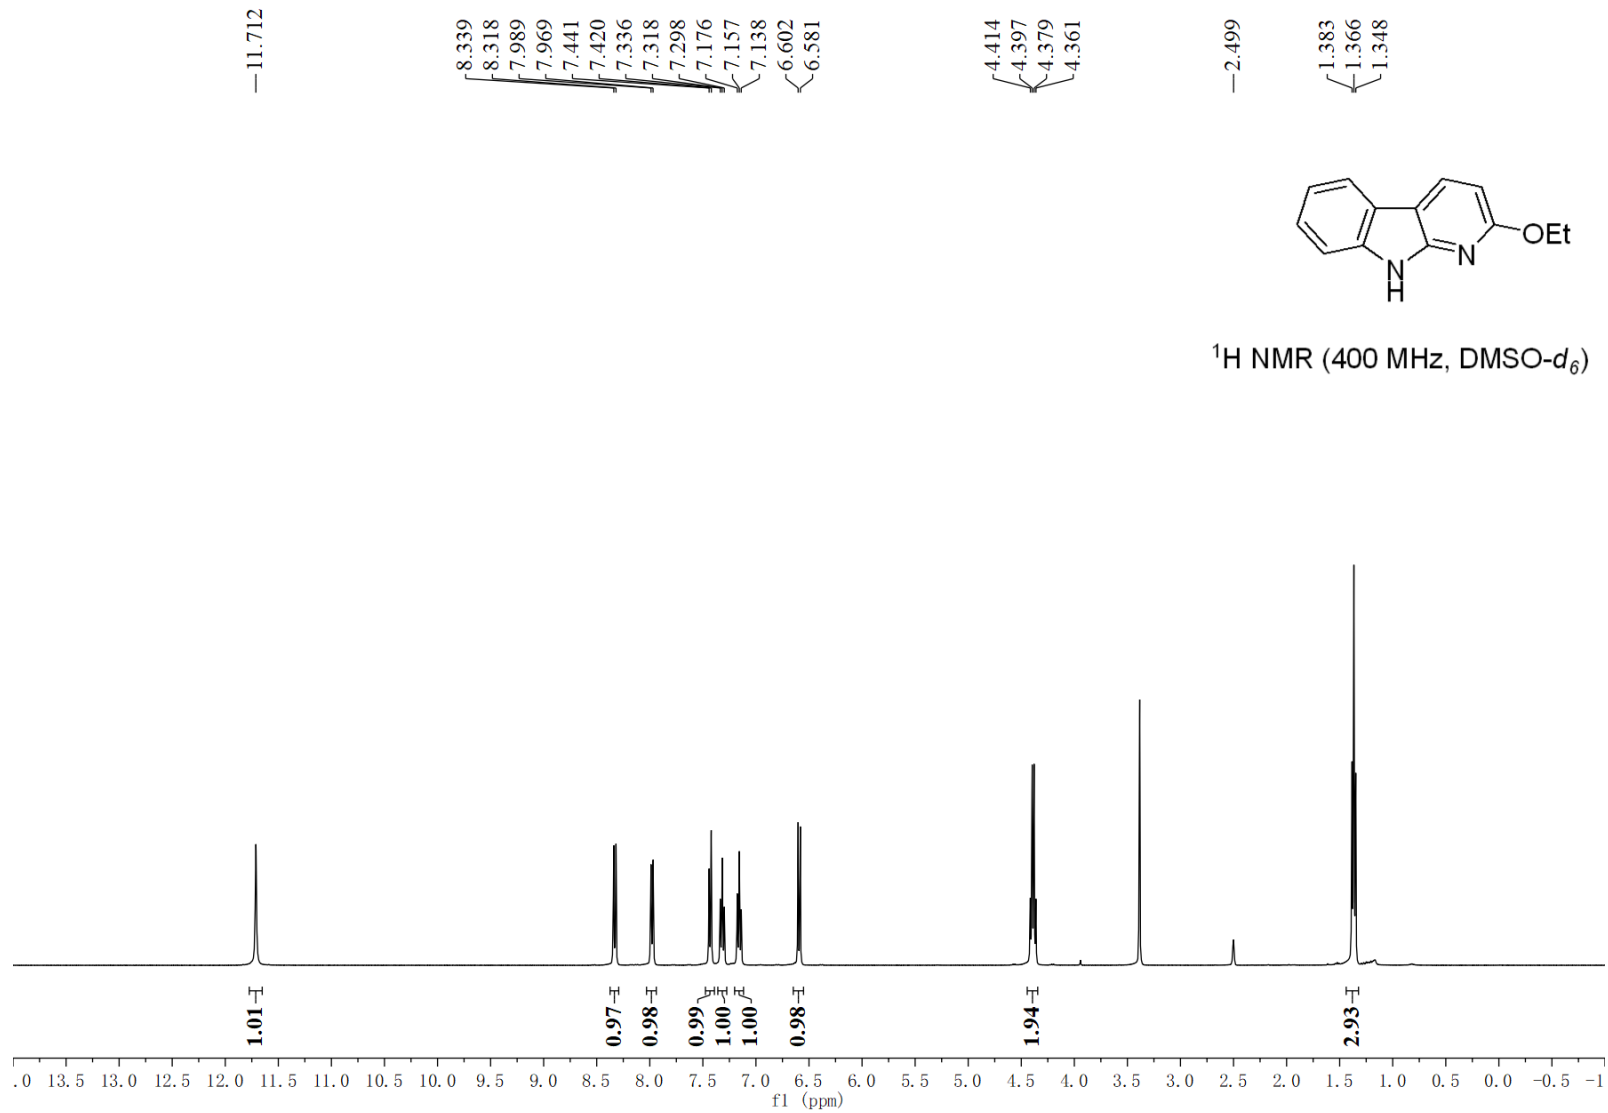

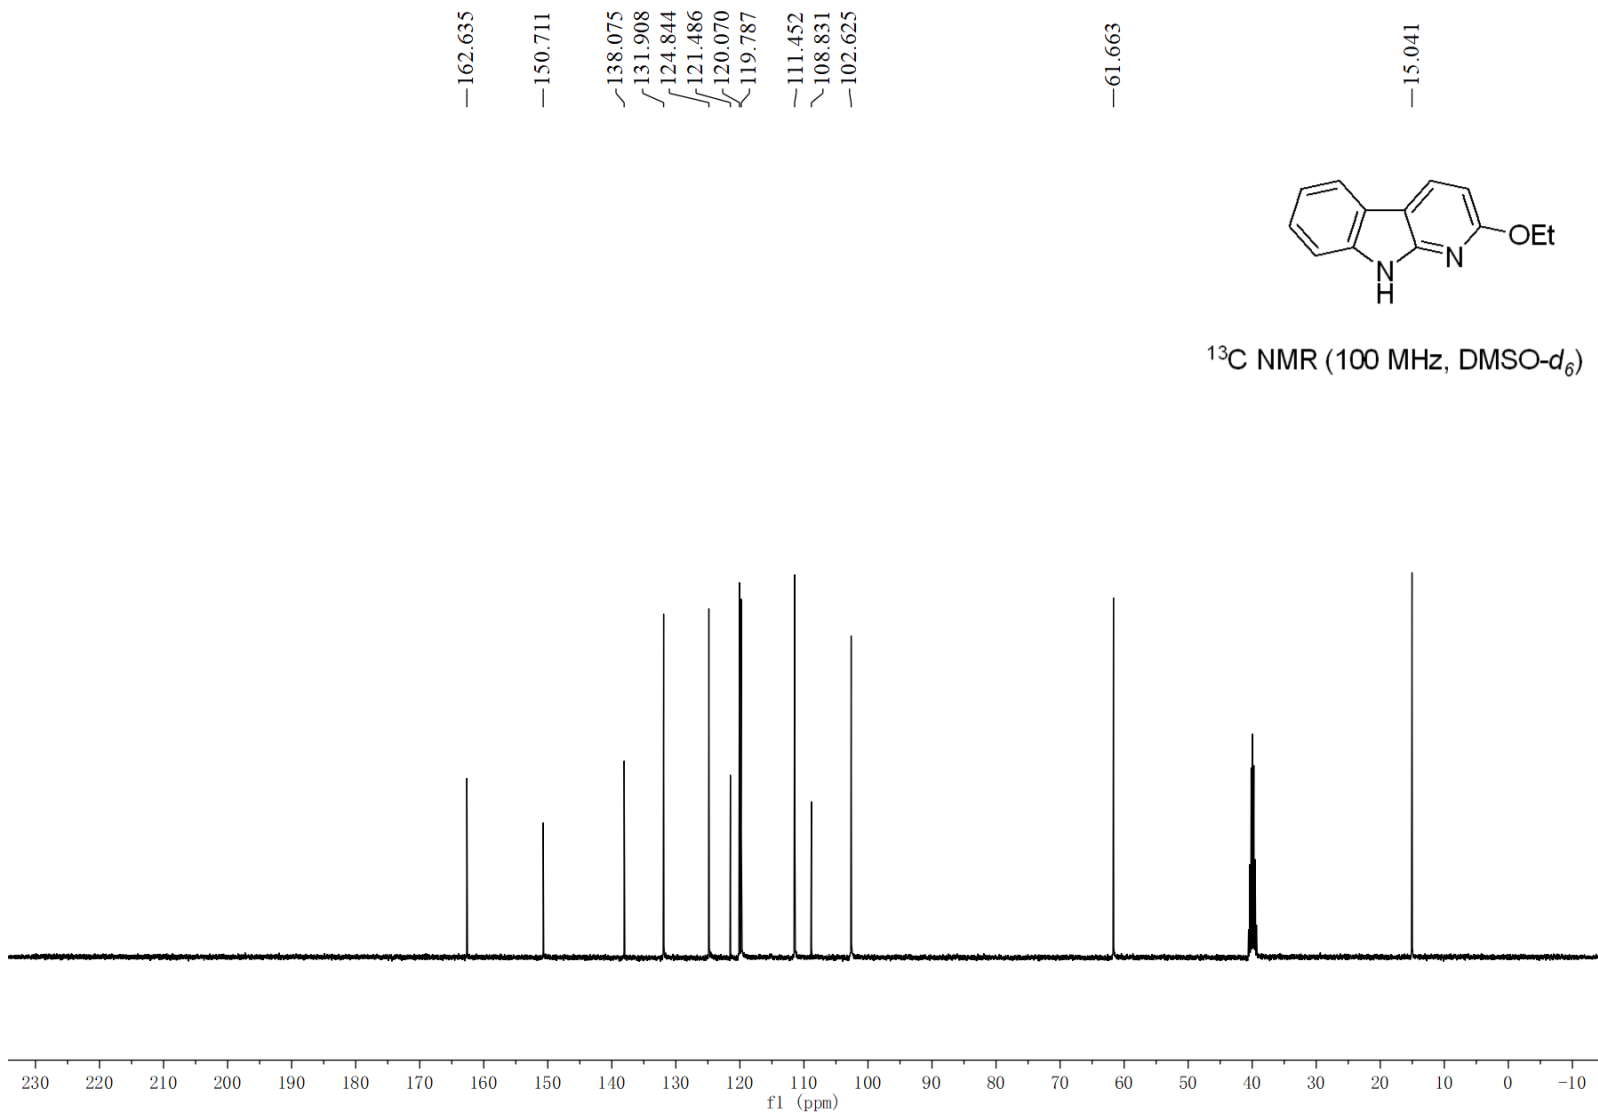

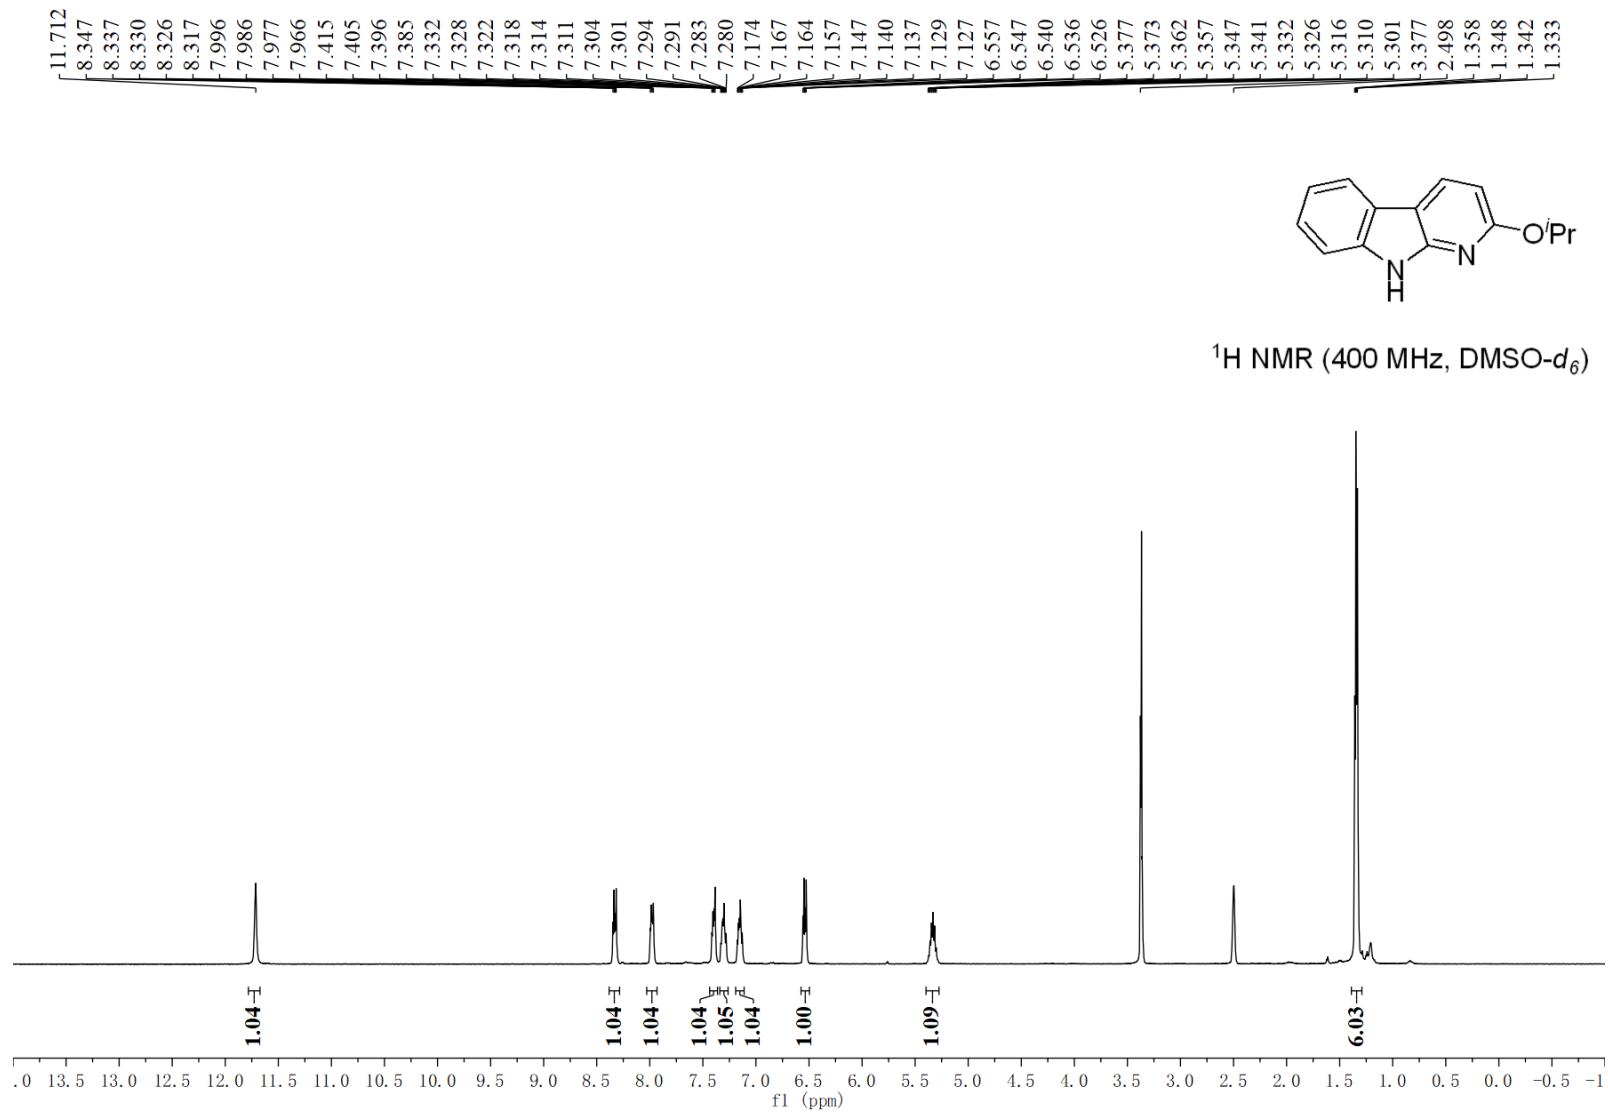



—162.130  
—150.670  
/ 132.027  
/ 124.810  
/ 121.467  
/ 120.075  
/ 119.768  
—111.398  
~ 108.622  
—103.171

—67.826

—22.437

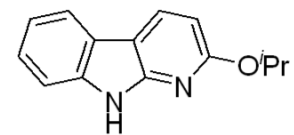

<sup>13</sup>C NMR (100 MHz, DMSO-d<sub>6</sub>)

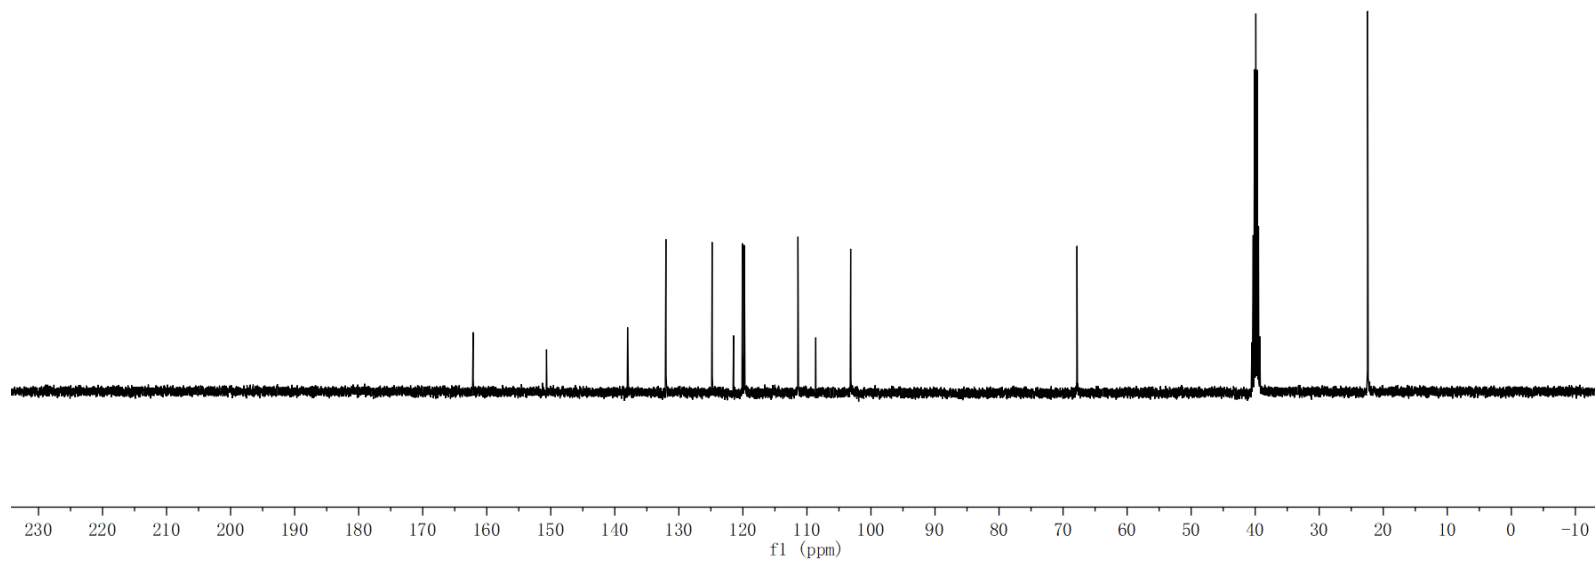

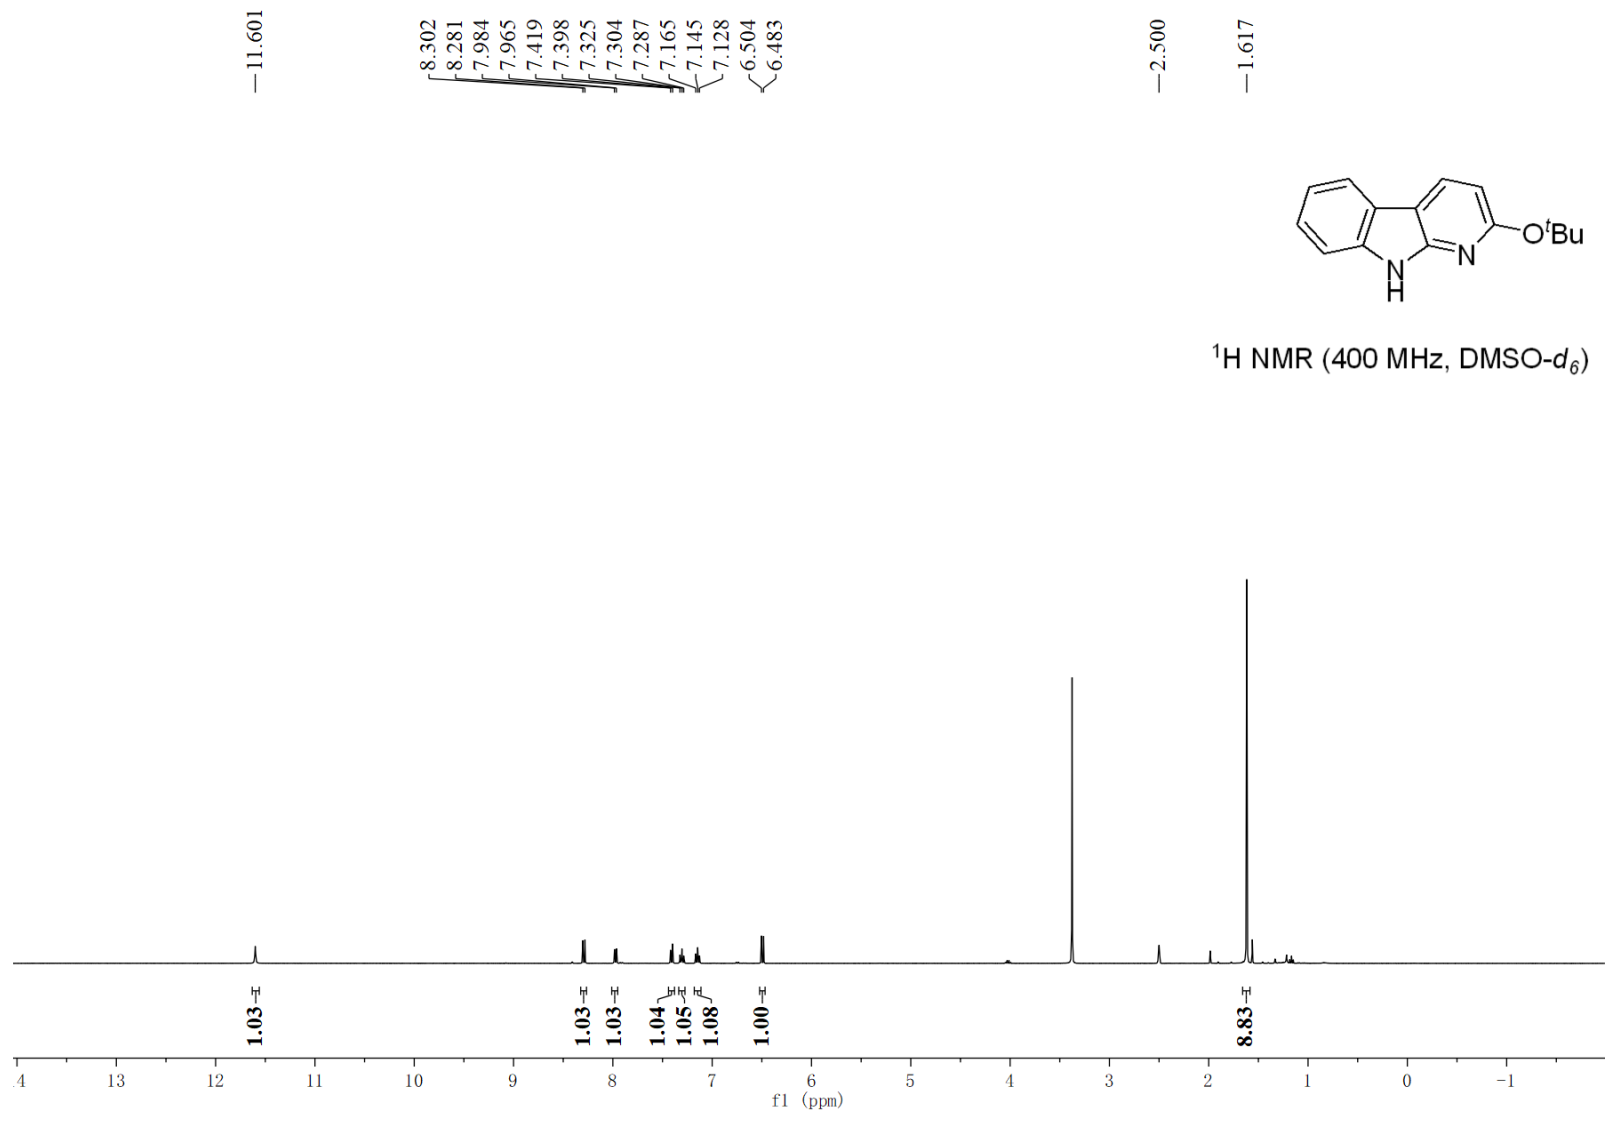

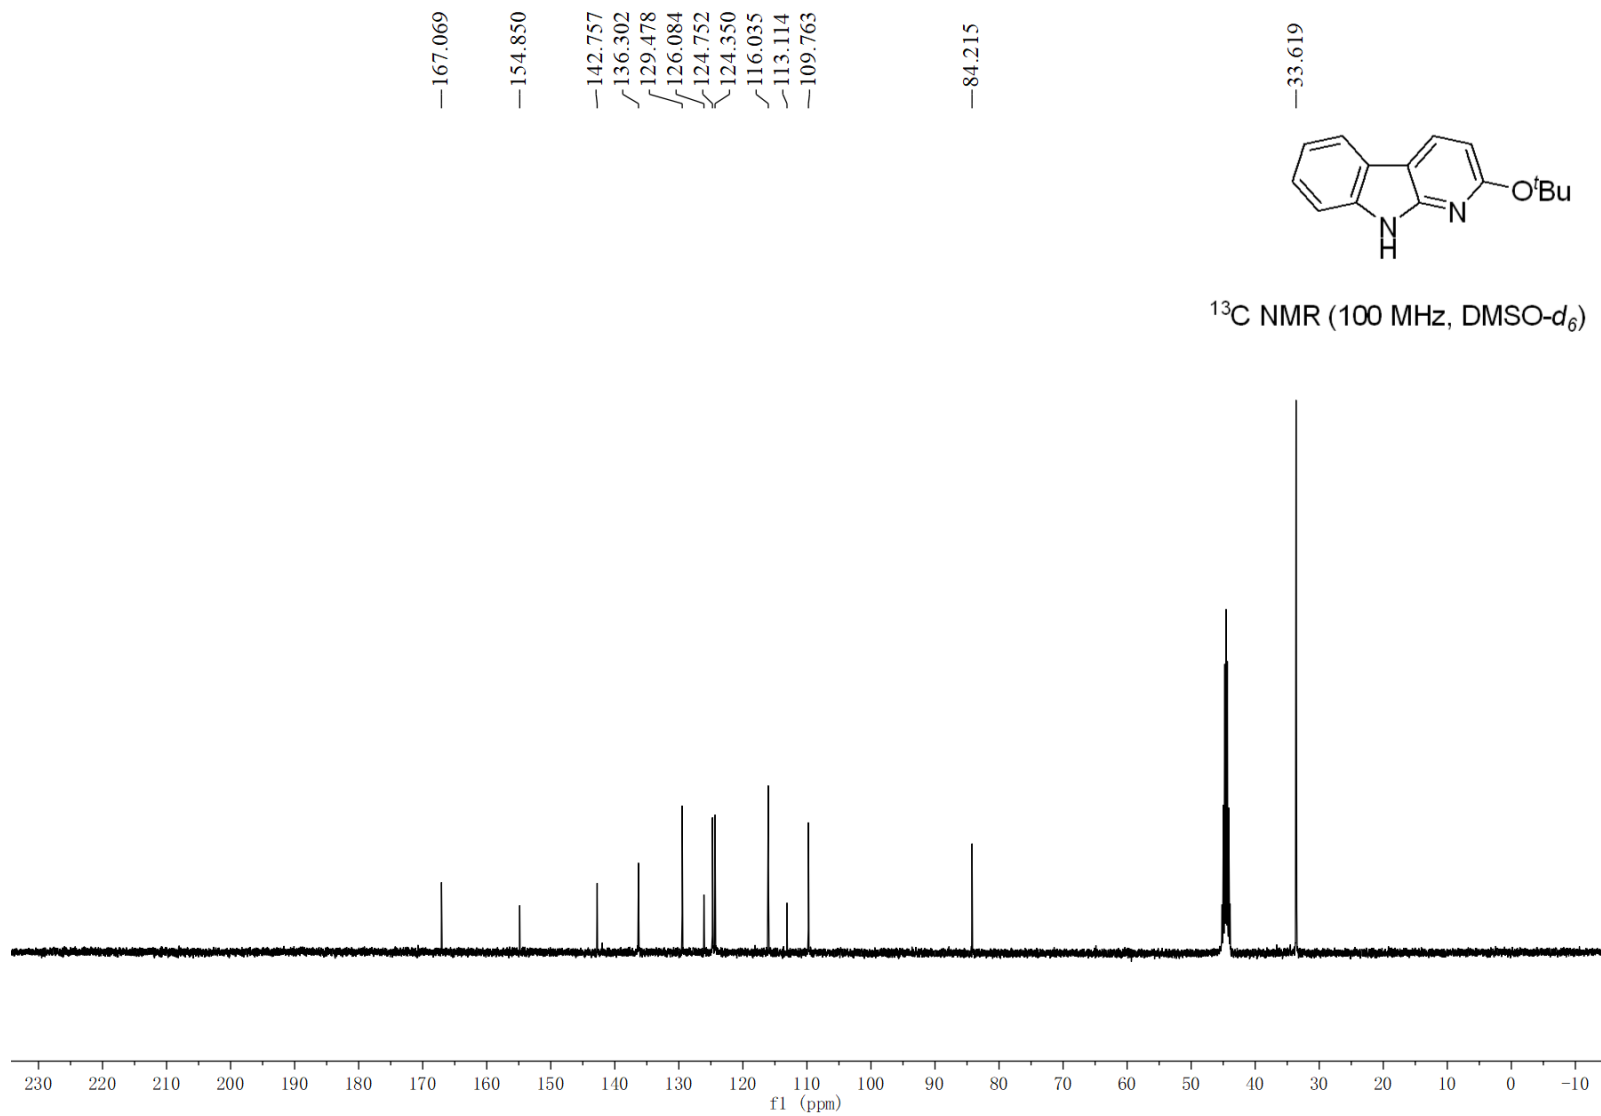

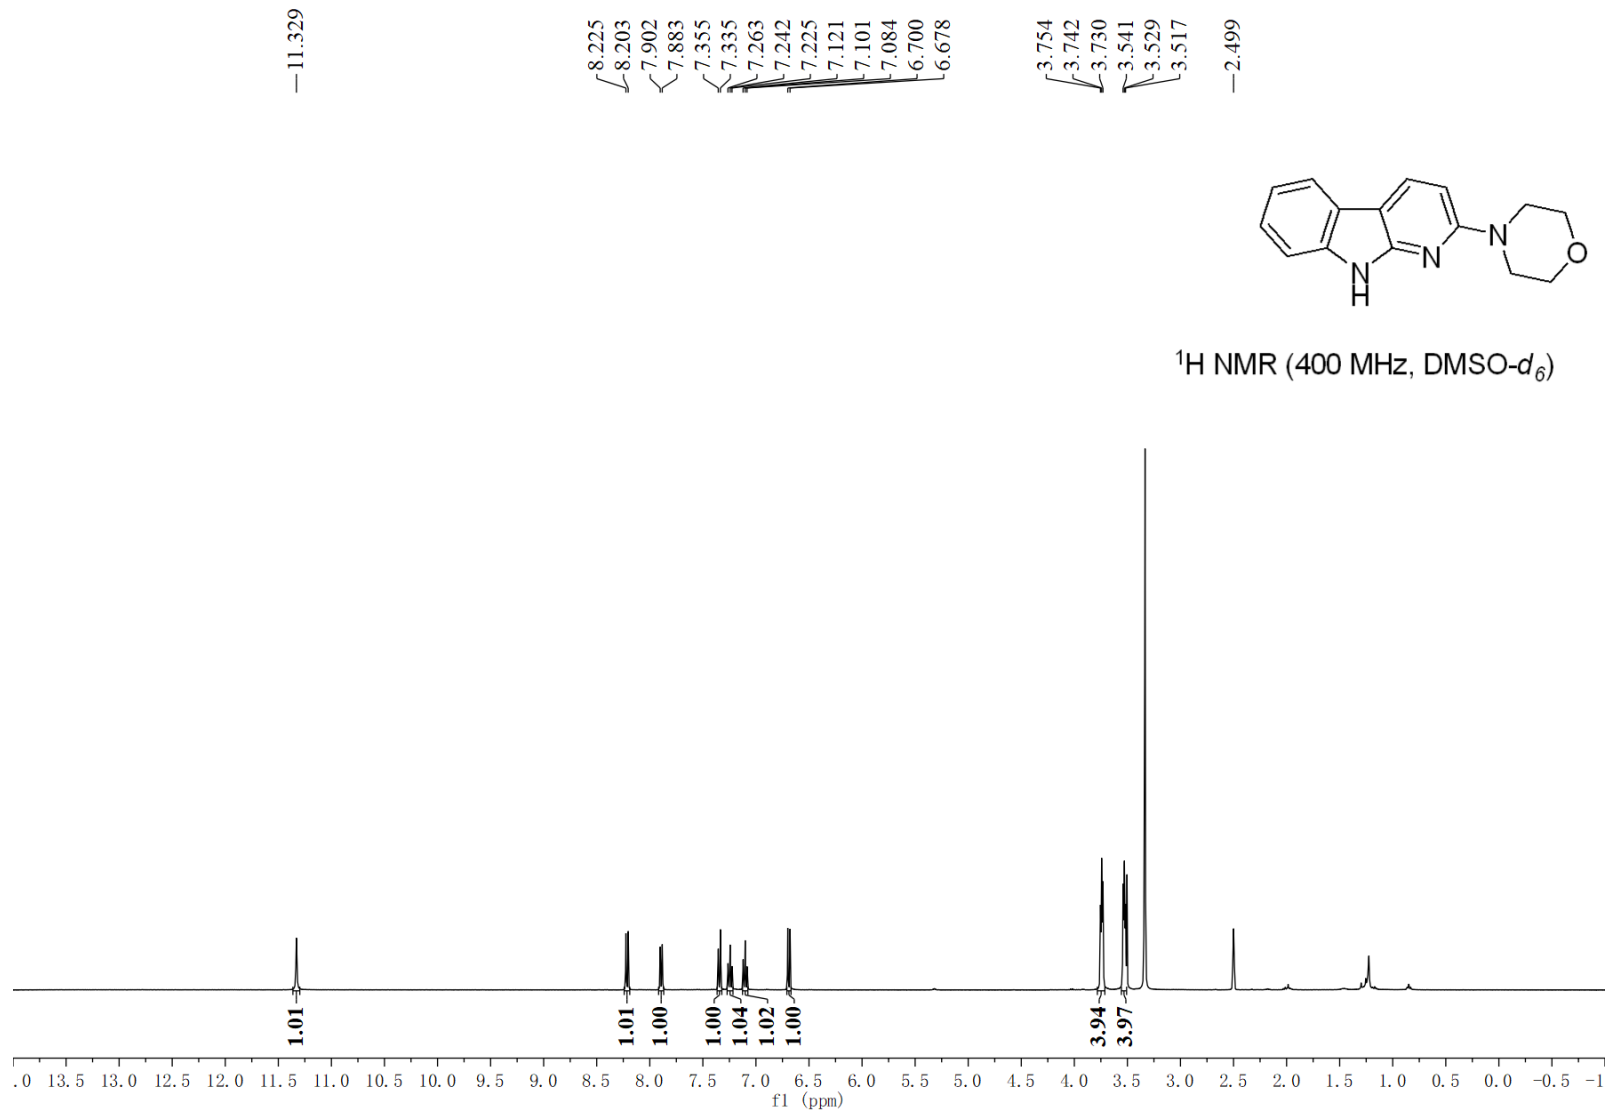

—158.462  
—151.850  
~138.073  
/130.663  
/124.242  
/121.897  
/119.559  
/119.482  
~111.066  
~106.778  
~100.081  
  
—70.243  
—66.481  
  
—46.088

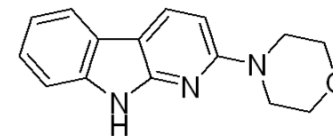

$^{13}\text{C}$  NMR (100 MHz,  $\text{DMSO-}d_6$ )

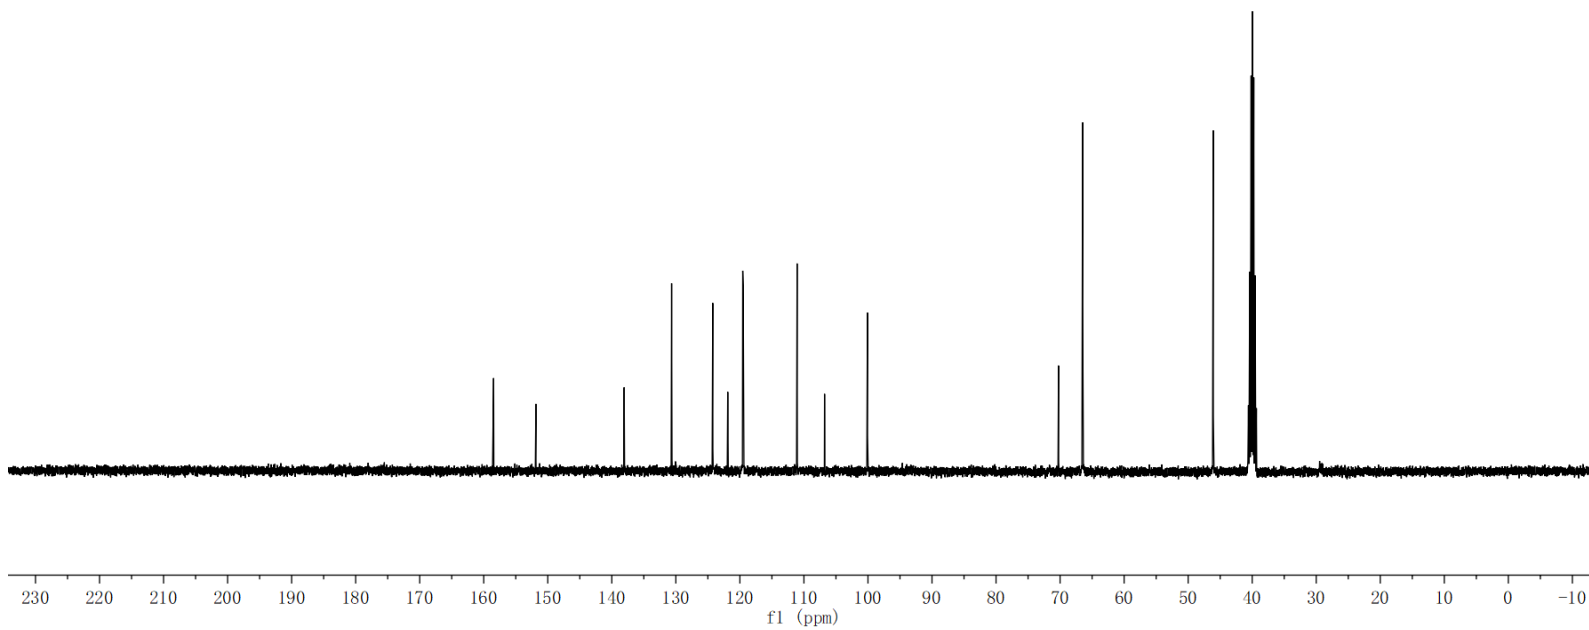

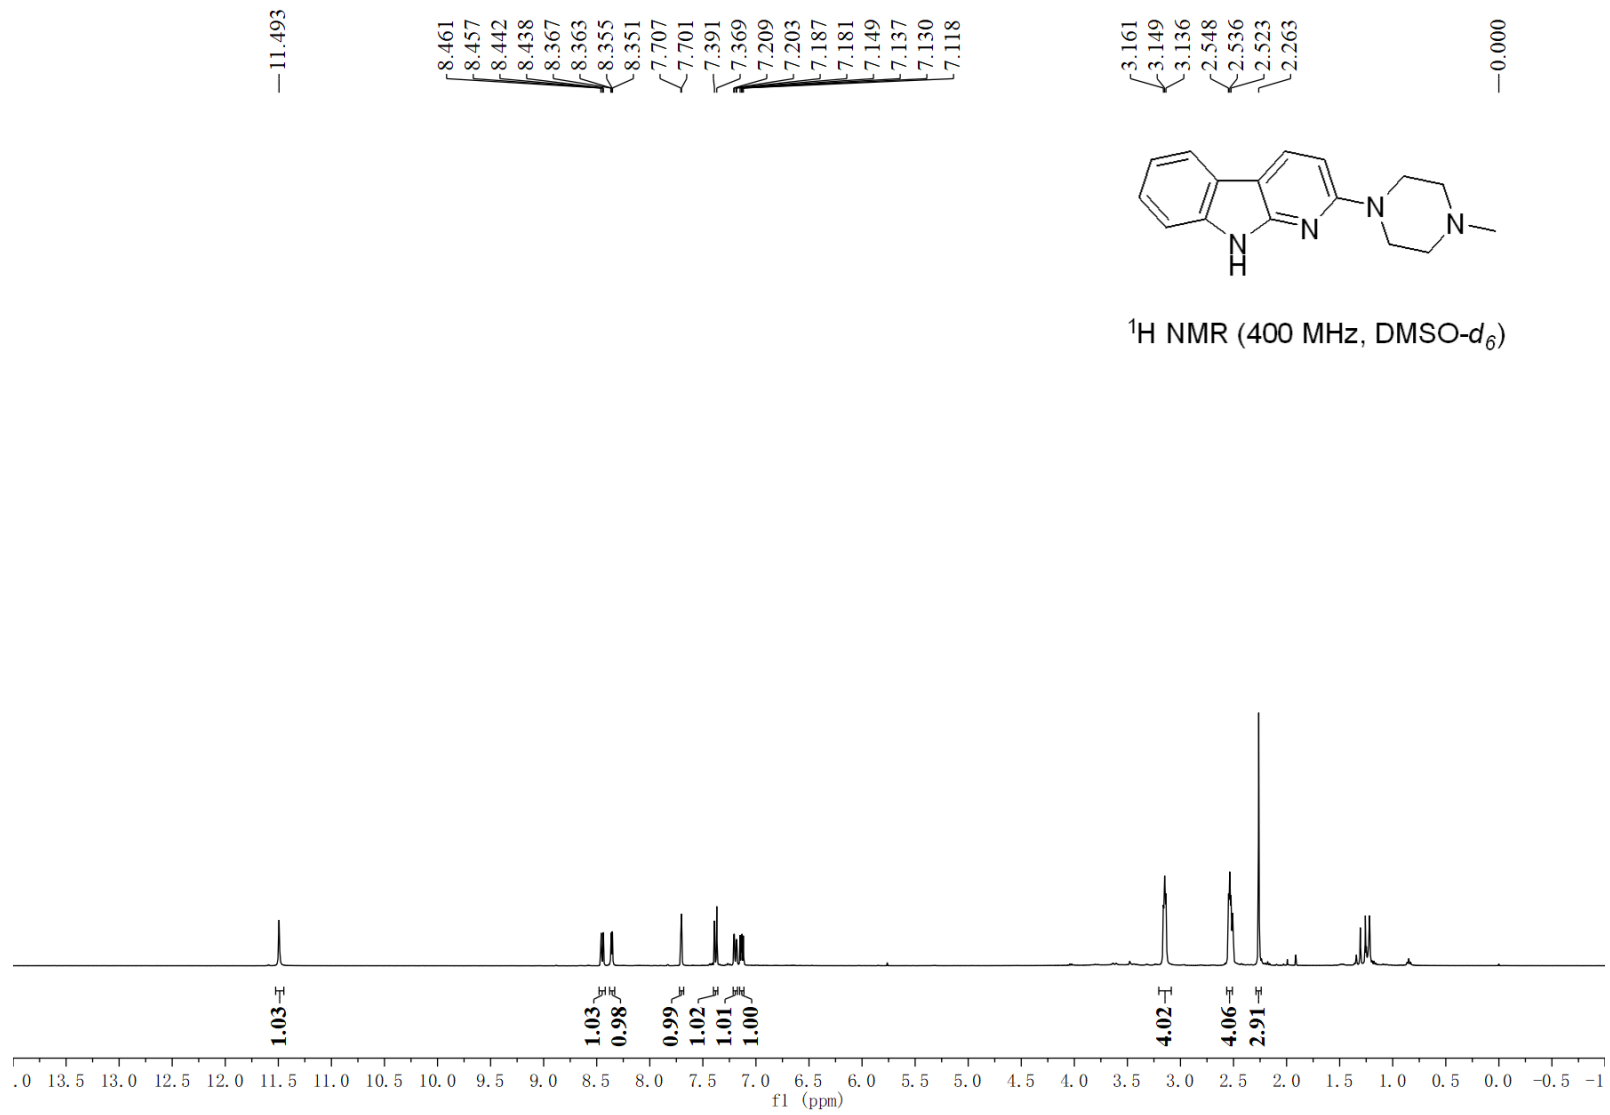

152.731  
146.118  
145.861  
133.806  
128.624  
121.207  
118.767  
115.858  
114.803  
111.965  
108.206

55.325  
50.682  
46.140

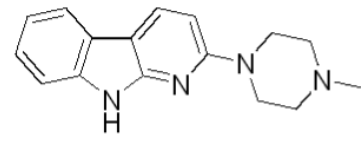

<sup>13</sup>C NMR (101 MHz, DMSO-d<sub>6</sub>)

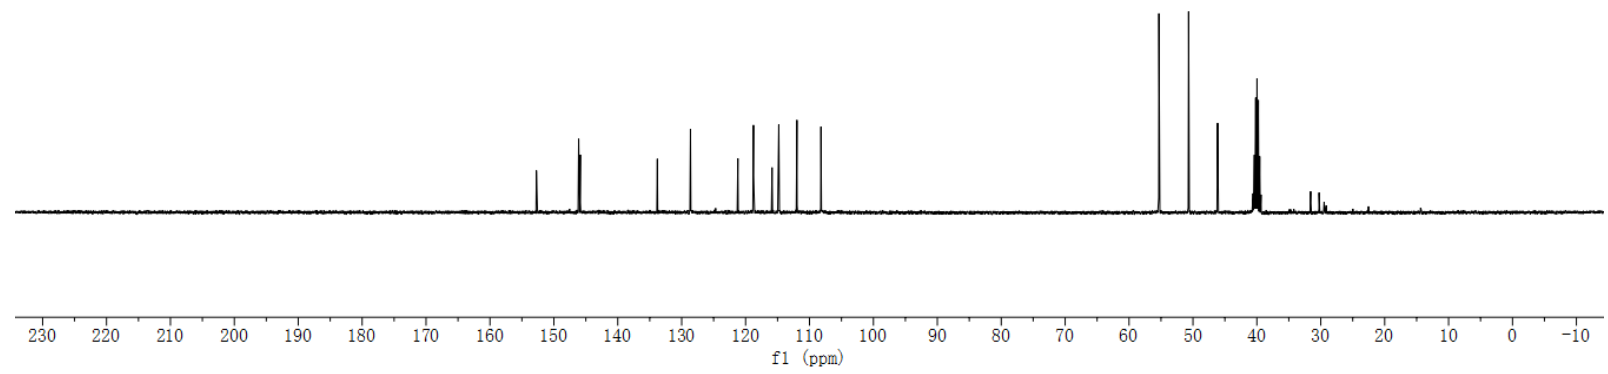

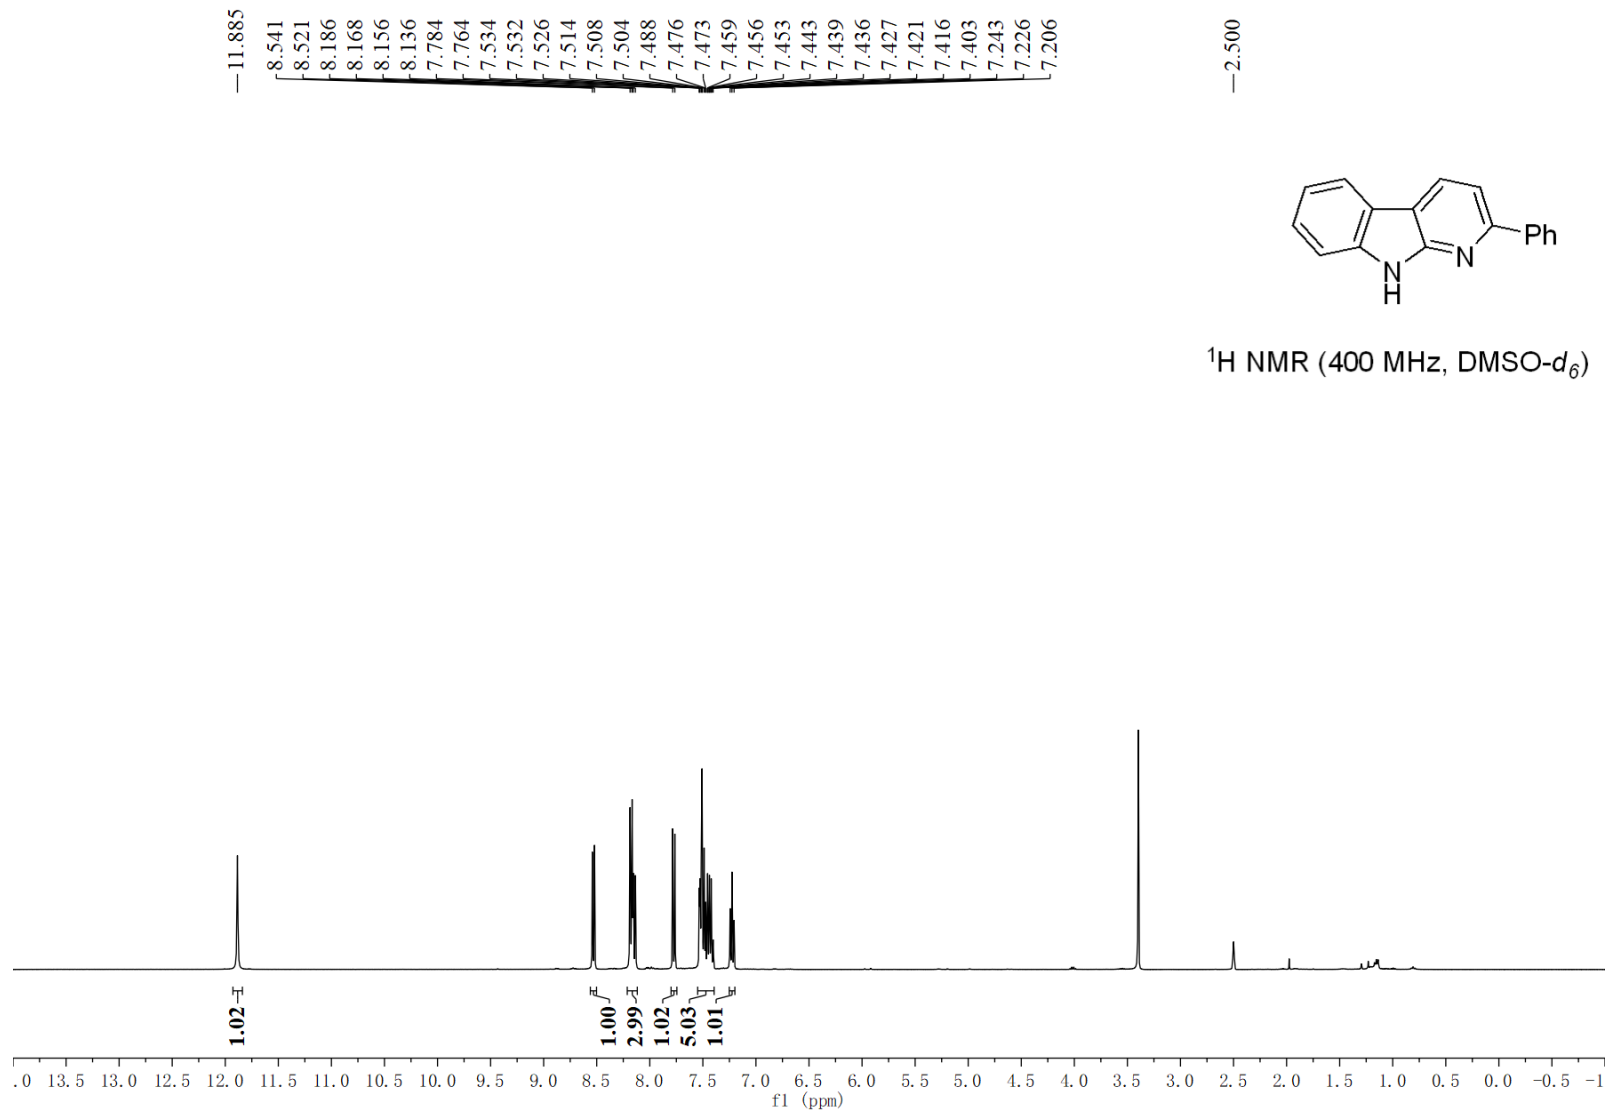



153.401  
152.541  
139.908  
139.784  
129.640  
129.160  
129.137  
129.052  
127.139  
127.098  
126.983  
121.542  
120.831  
119.953  
114.723  
112.357  
111.672

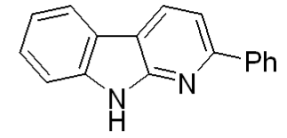

$^{13}\text{C}$  NMR (100 MHz,  $\text{DMSO-}d_6$ )

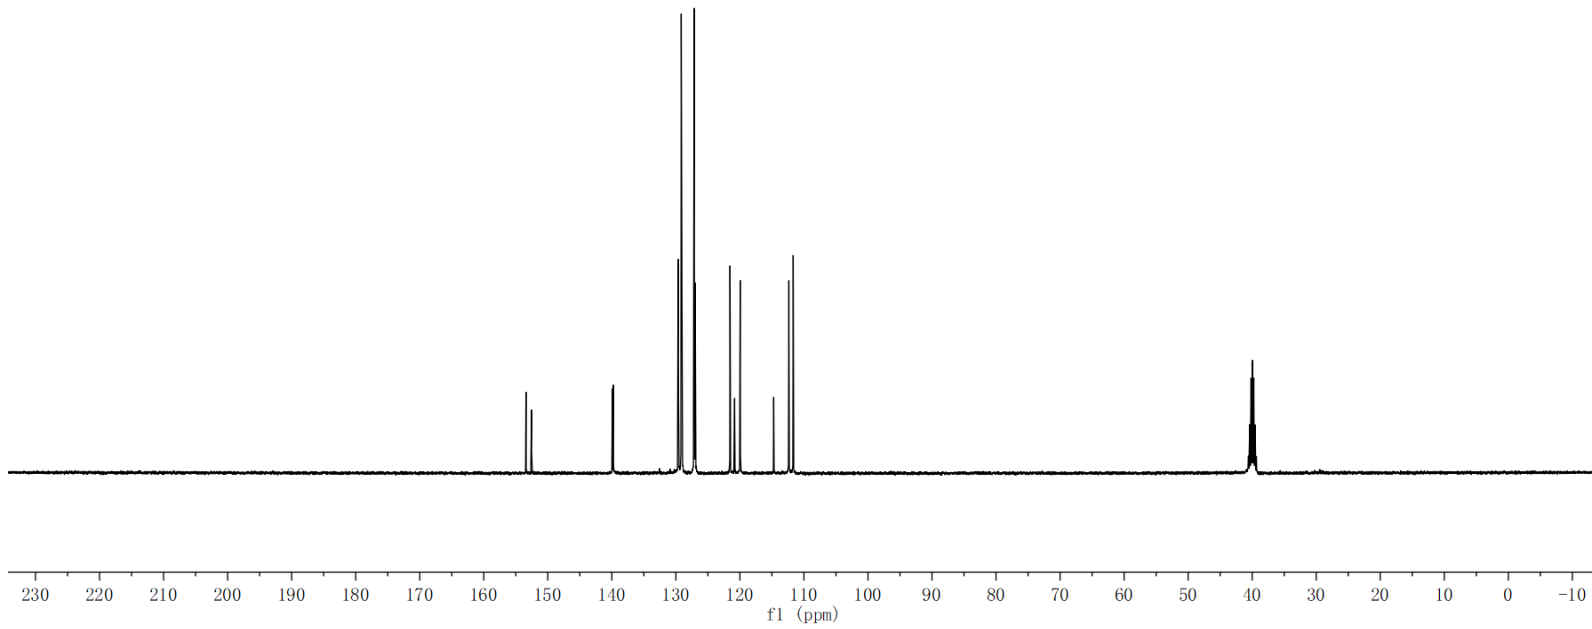

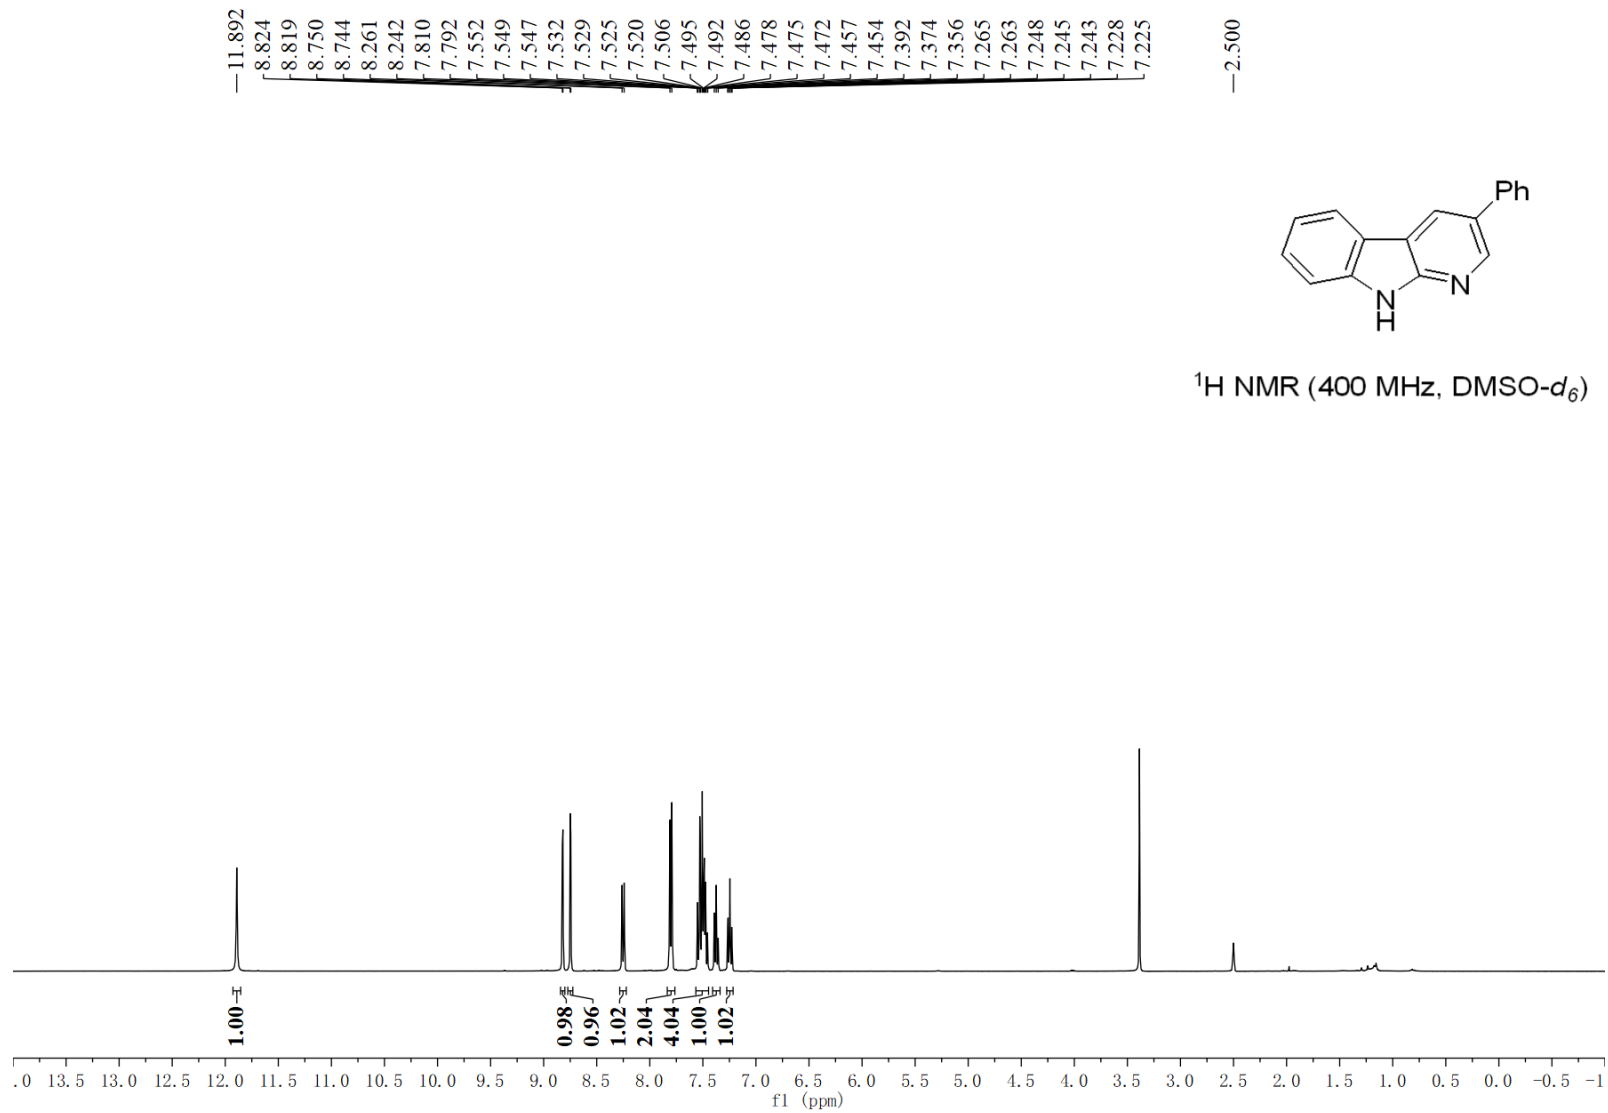

151.911  
145.211  
139.859  
139.066  
129.456  
128.065  
127.392  
127.261  
127.232  
126.956  
121.893  
120.978  
119.953  
115.808  
111.813

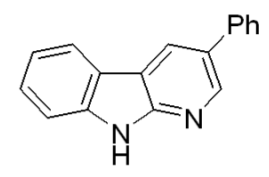

<sup>13</sup>C NMR (100 MHz, DMSO-d<sub>6</sub>)

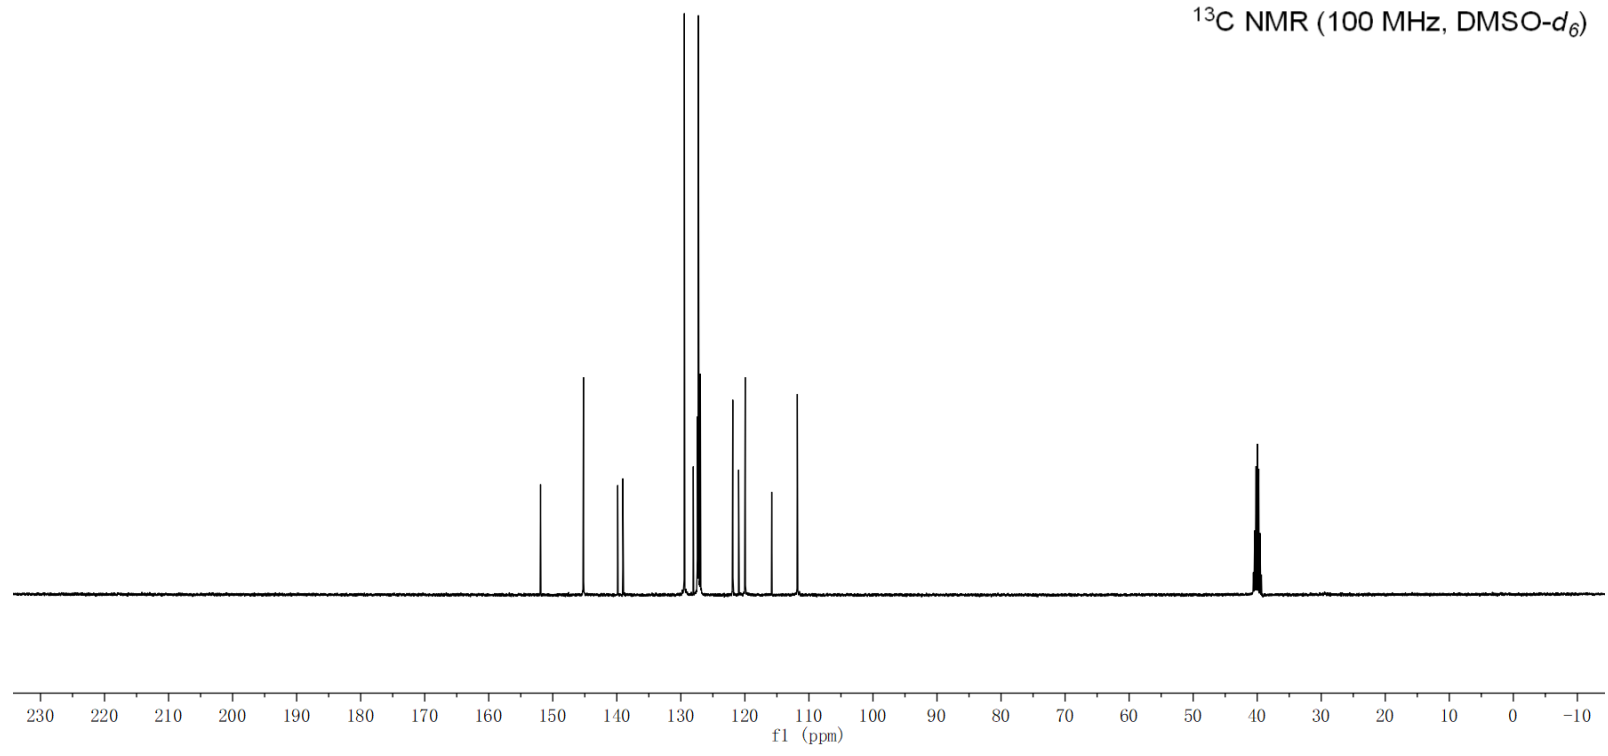

-12.028

8.458  
8.446  
7.685  
7.680  
7.668  
7.664  
7.661  
7.629  
7.625  
7.620  
7.608  
7.603  
7.594  
7.589  
7.581  
7.576  
7.572  
7.566  
7.559  
7.550  
7.542  
7.532  
7.514  
7.511  
7.427  
7.407  
7.388  
7.094  
7.082  
7.036  
7.017  
6.998  
2.500

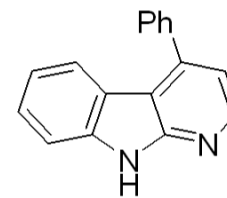

<sup>1</sup>H NMR (400 MHz, DMSO-*d*<sub>6</sub>)

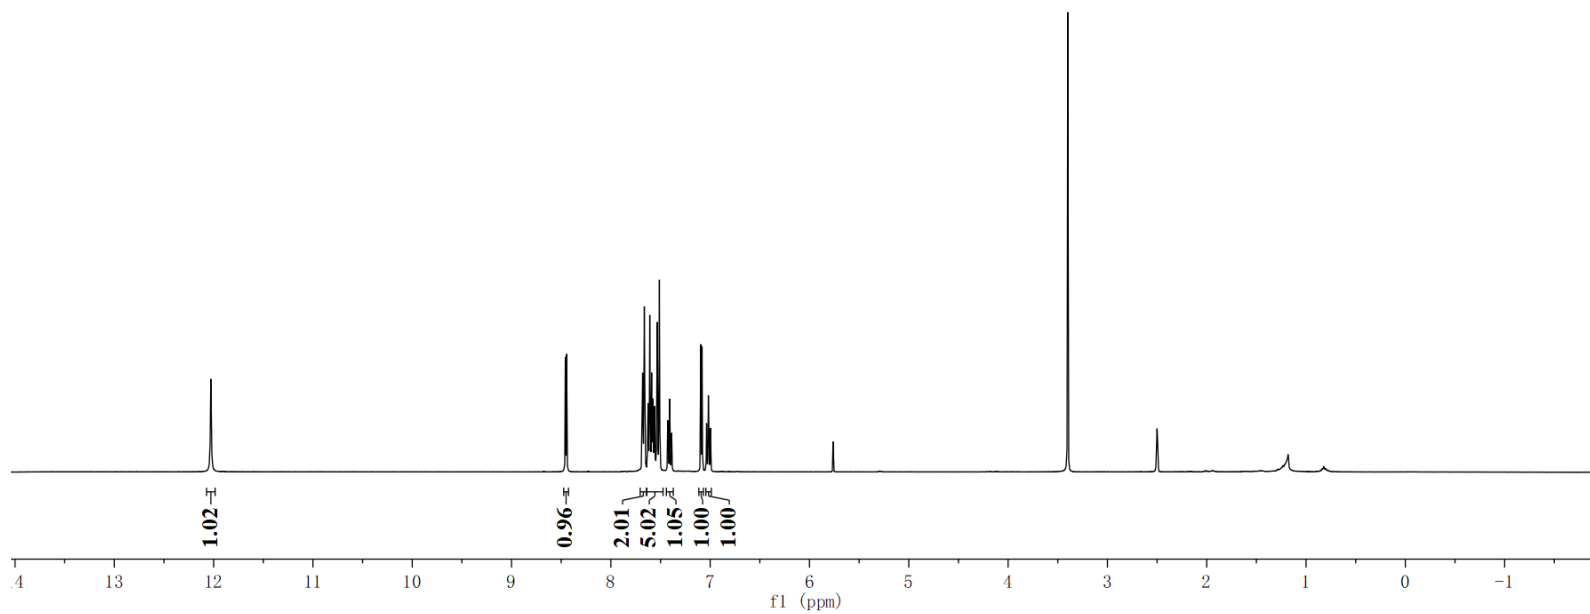

152.737  
146.485  
144.687  
139.438  
138.883  
129.277  
129.157  
128.902  
126.964  
122.273  
120.181  
119.559  
116.323  
112.541  
111.818

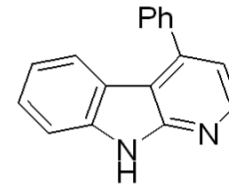

$^{13}\text{C}$  NMR (100 MHz,  $\text{DMSO-}d_6$ )

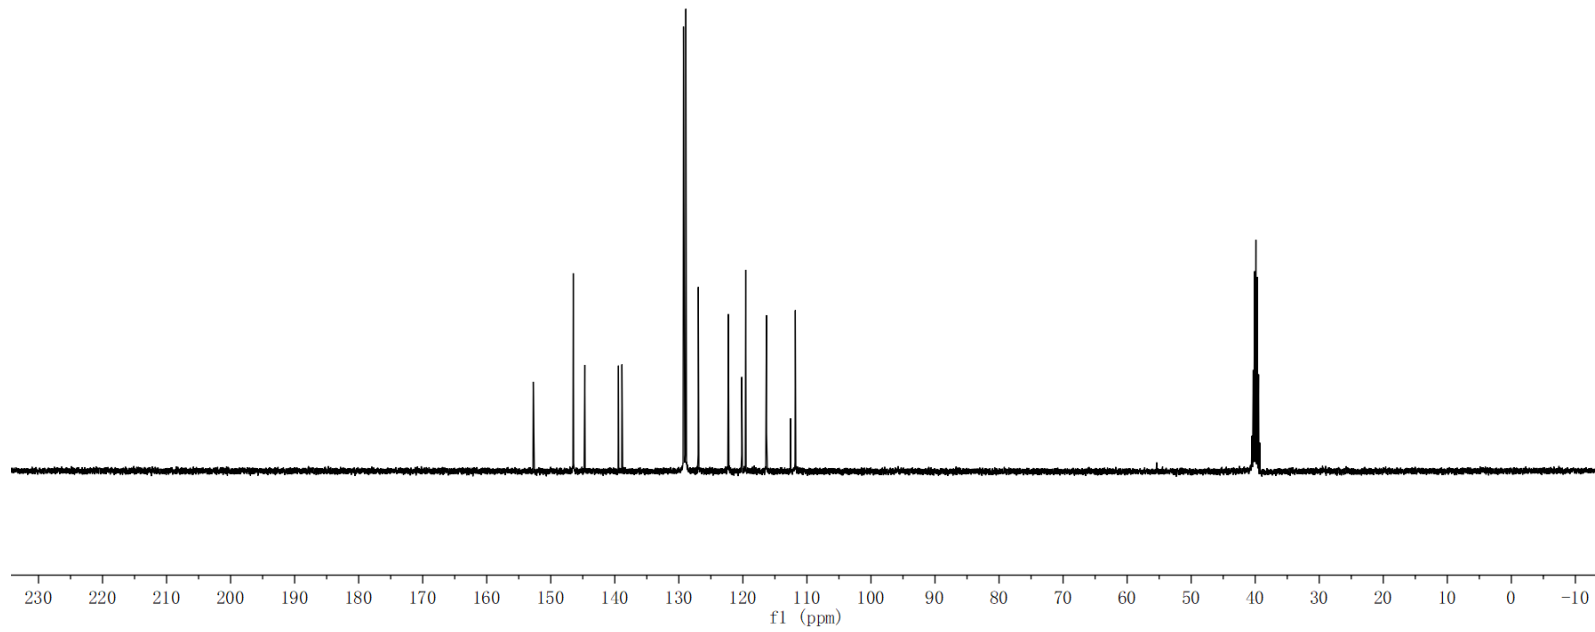

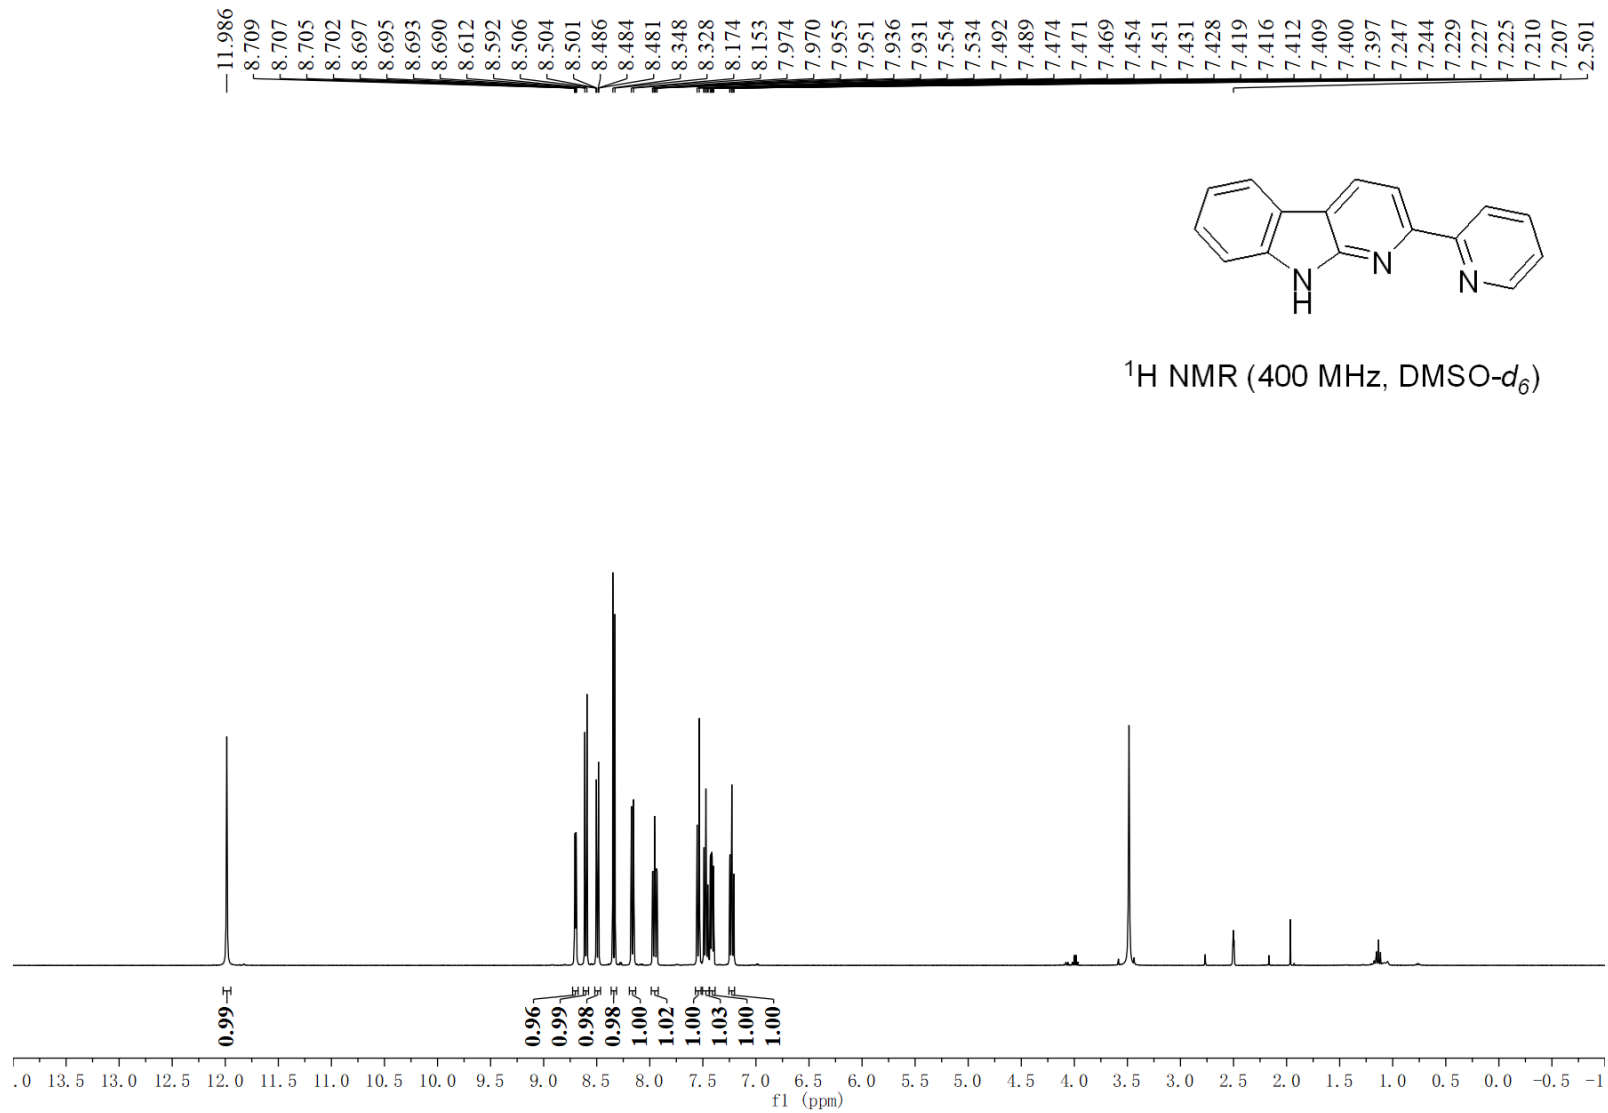

160.383  
158.596  
154.530  
154.207  
150.948  
142.473  
142.373  
140.978  
135.431  
134.244  
129.226  
127.103  
125.741  
125.496  
122.087  
120.823

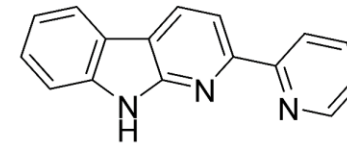

<sup>13</sup>C NMR (100 MHz, DMSO-*d*<sub>6</sub>)

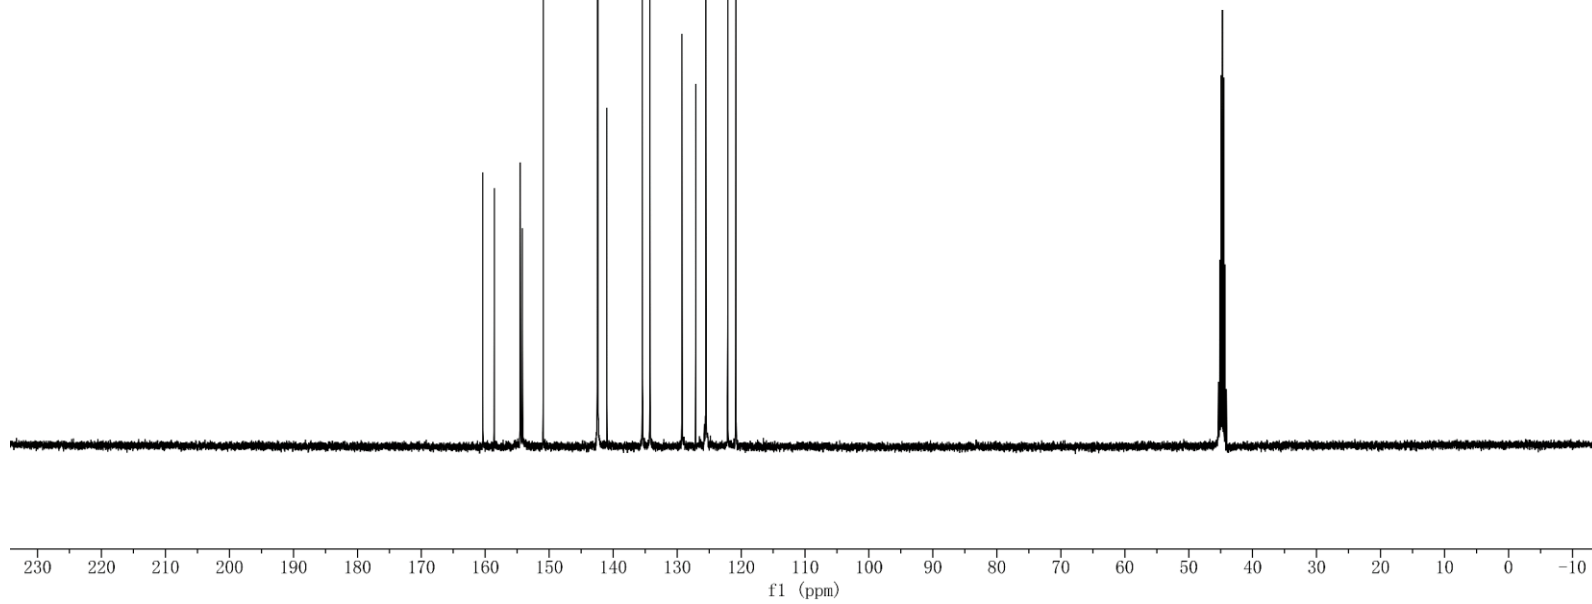

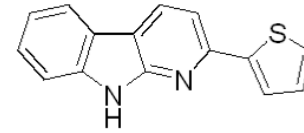

$^1\text{H}$  NMR (400 MHz,  $\text{DMSO-}d_6$ )

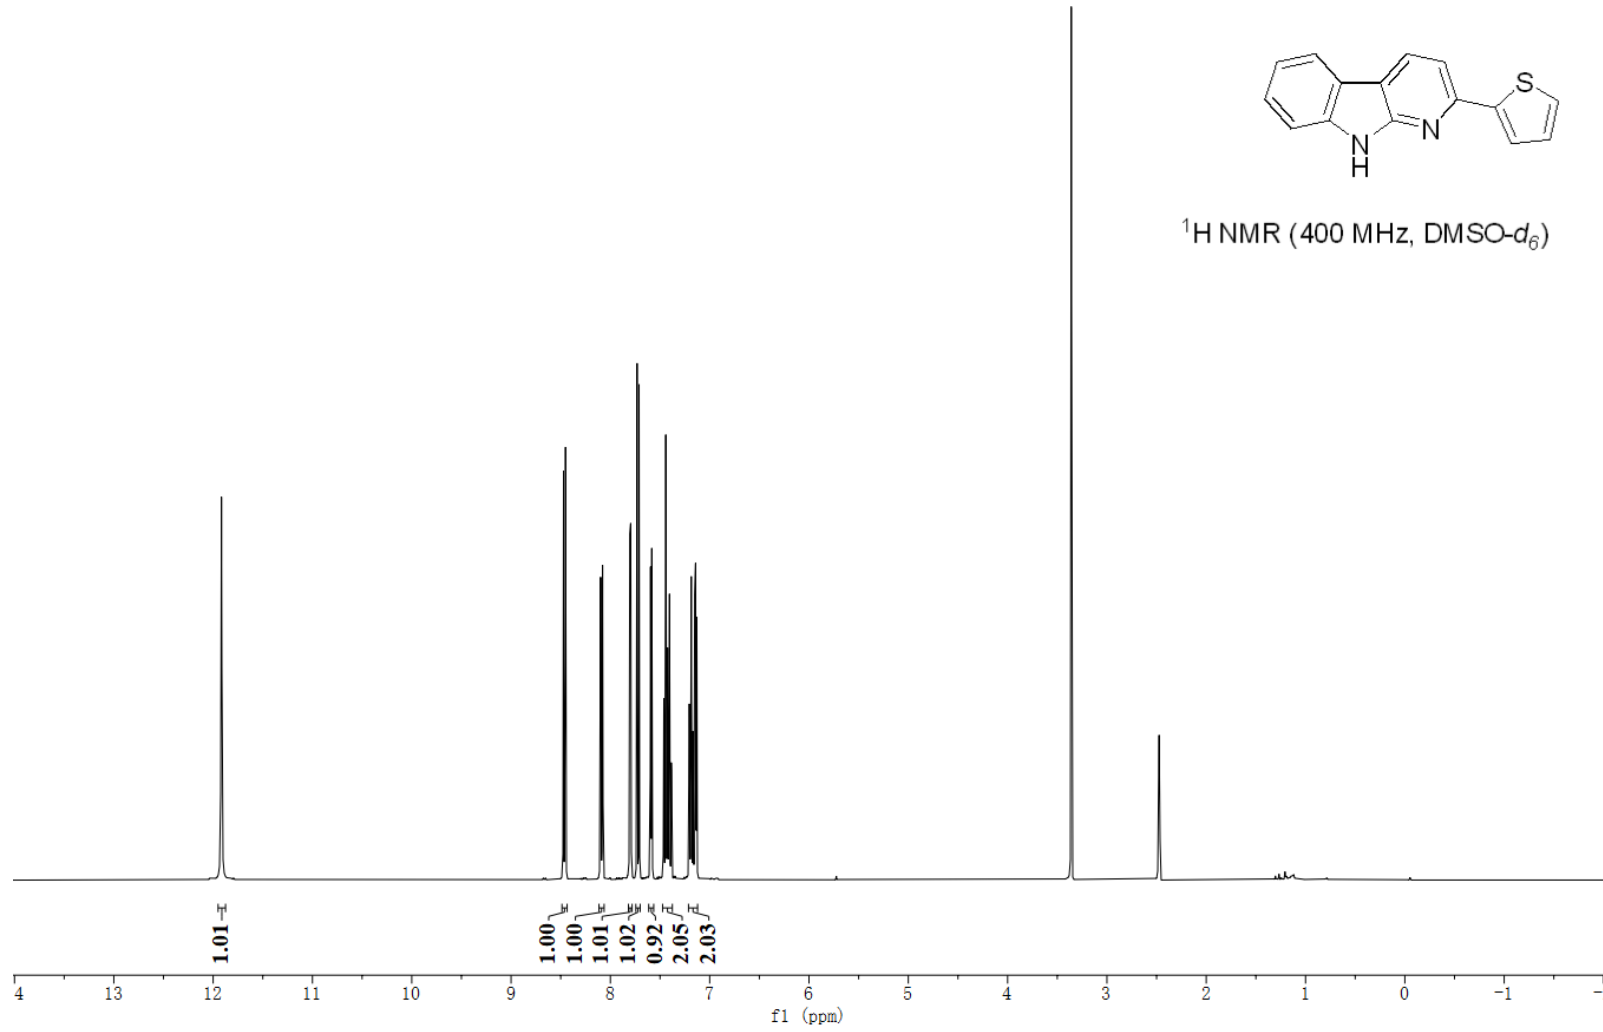



152.086  
149.120  
146.011  
139.617  
129.626  
128.840  
128.166  
126.903  
125.411  
121.368  
120.956  
120.069  
114.616  
111.661  
111.058

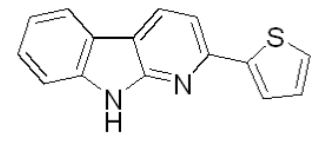

<sup>13</sup>C NMR (101 MHz, DMSO-d<sub>6</sub>)

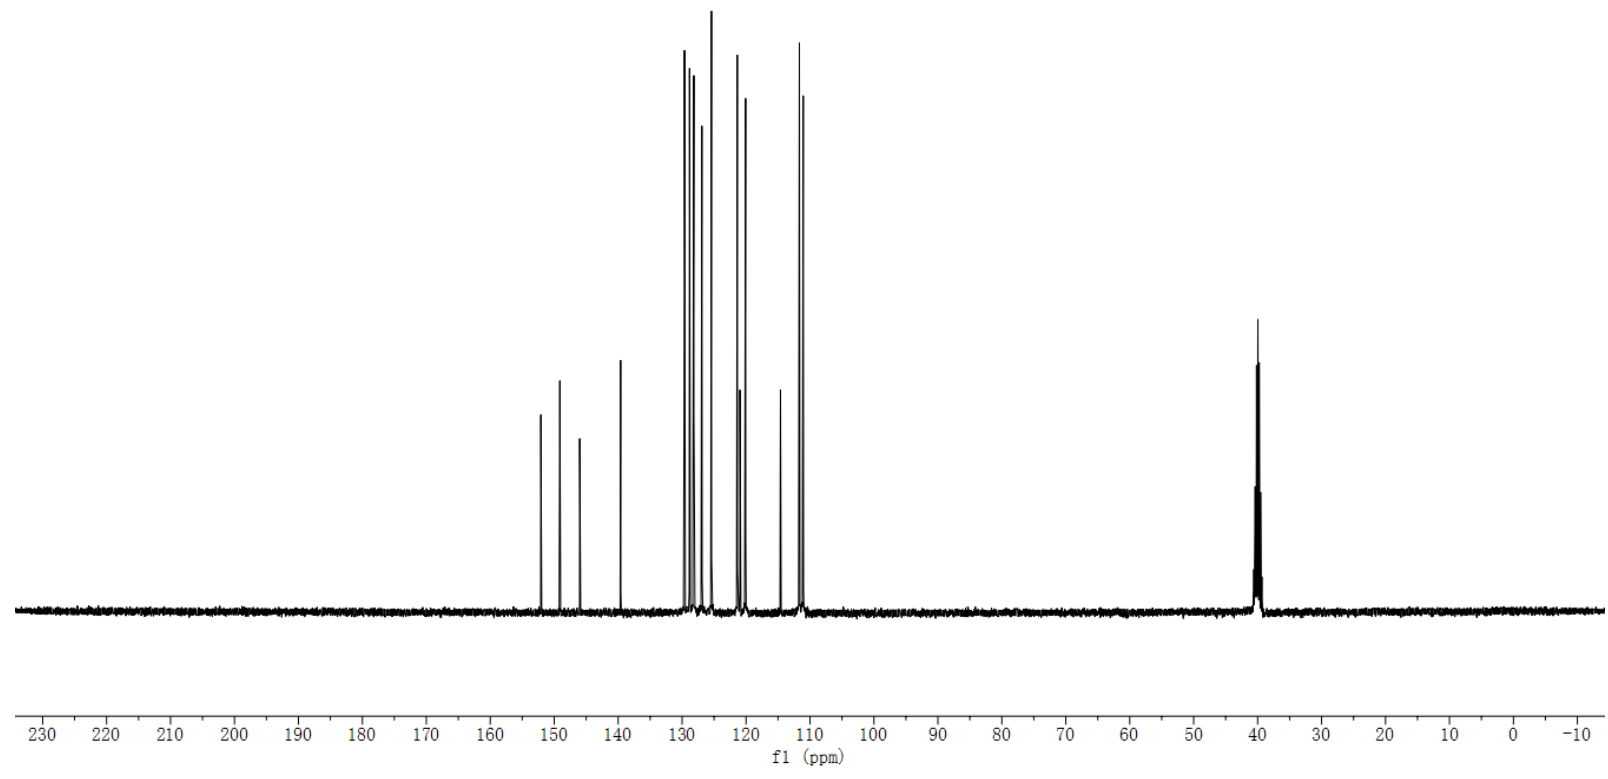

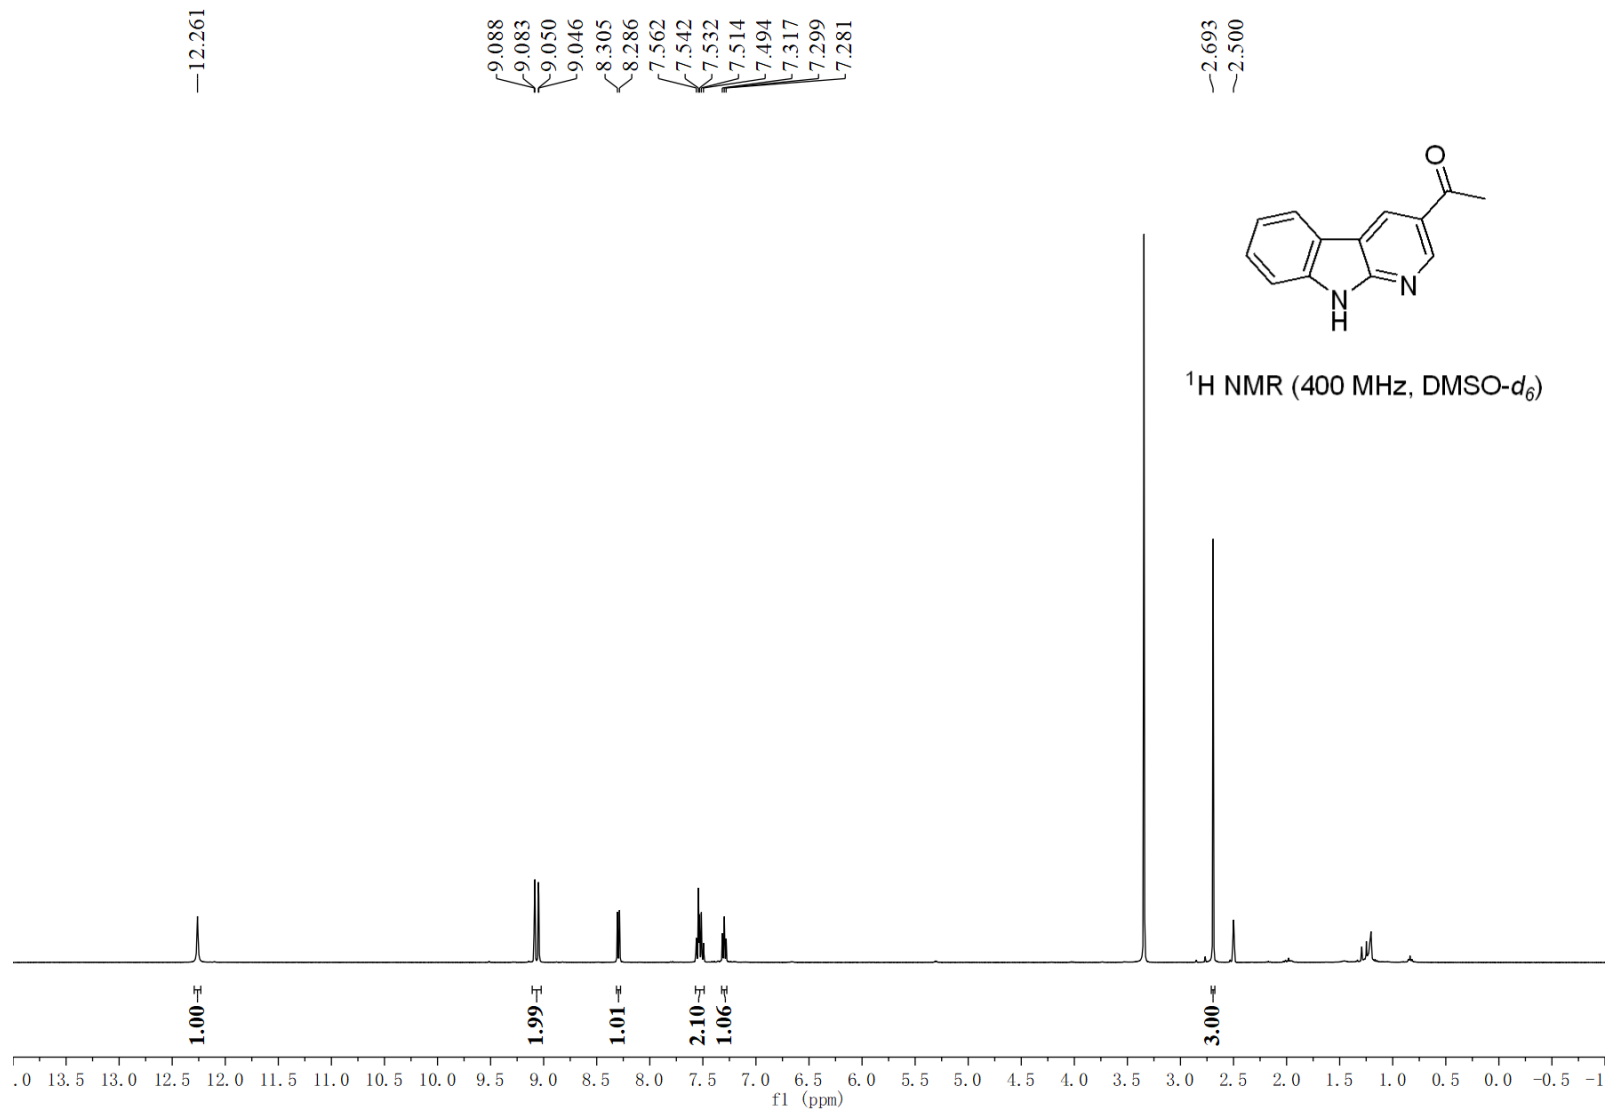

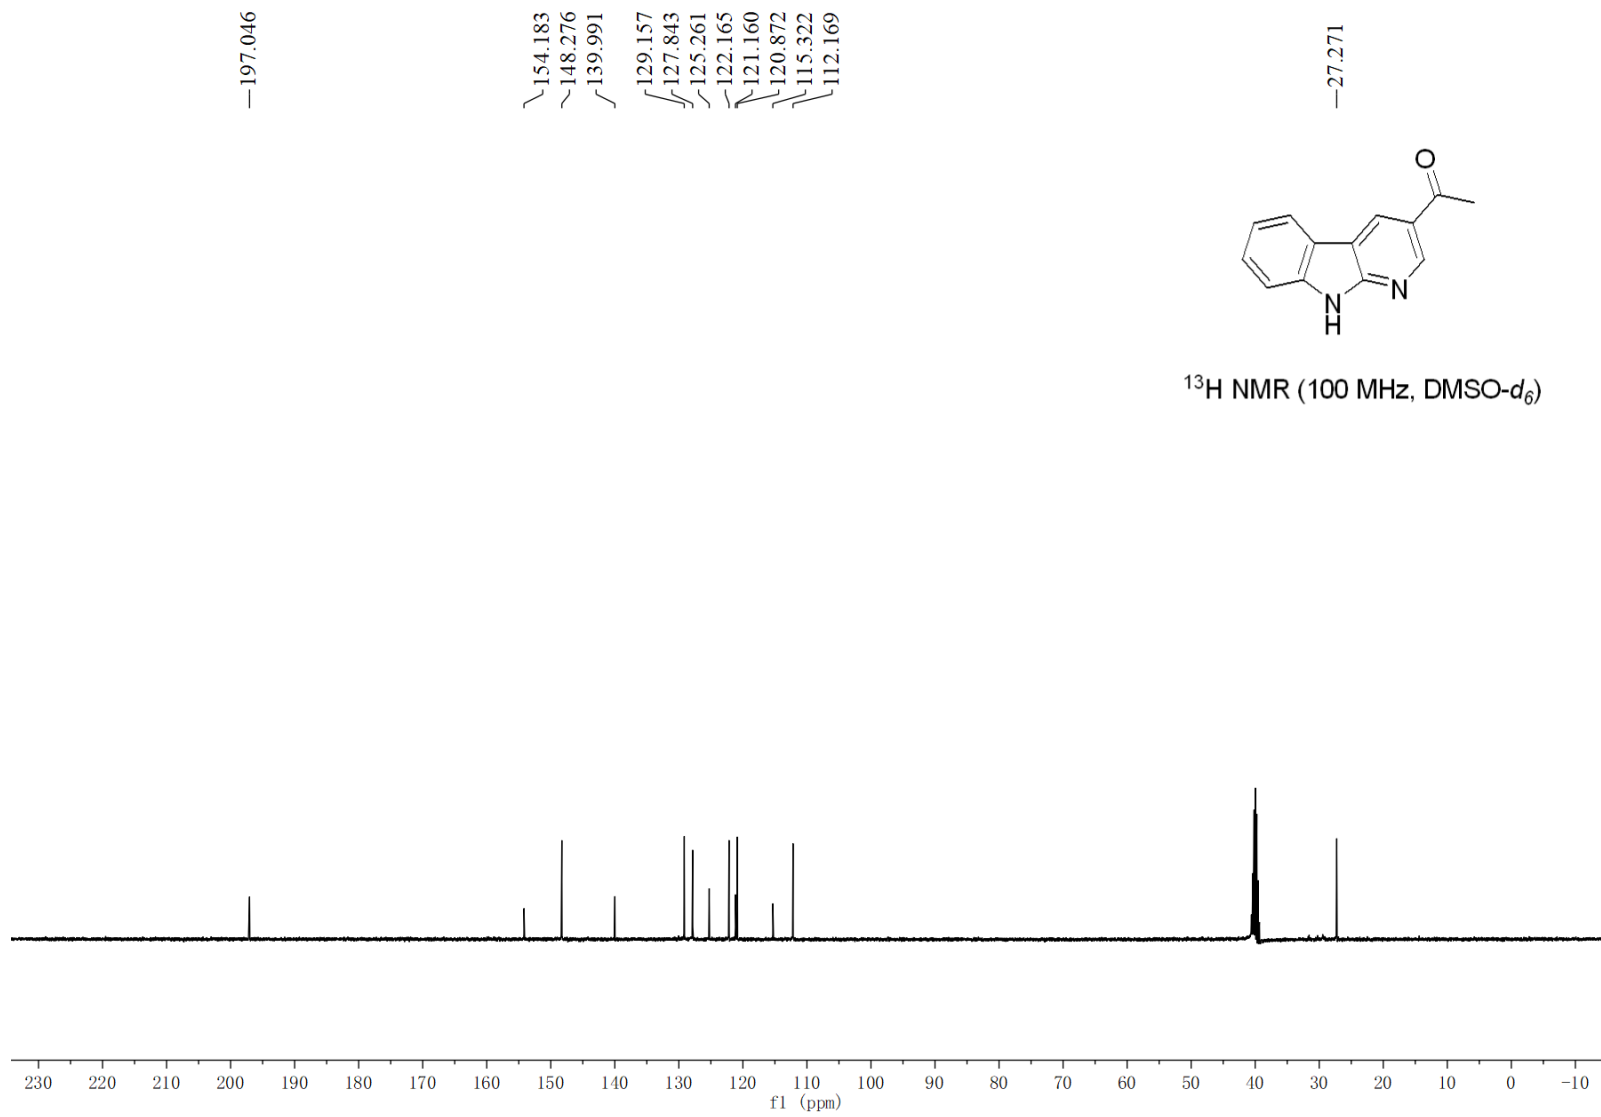

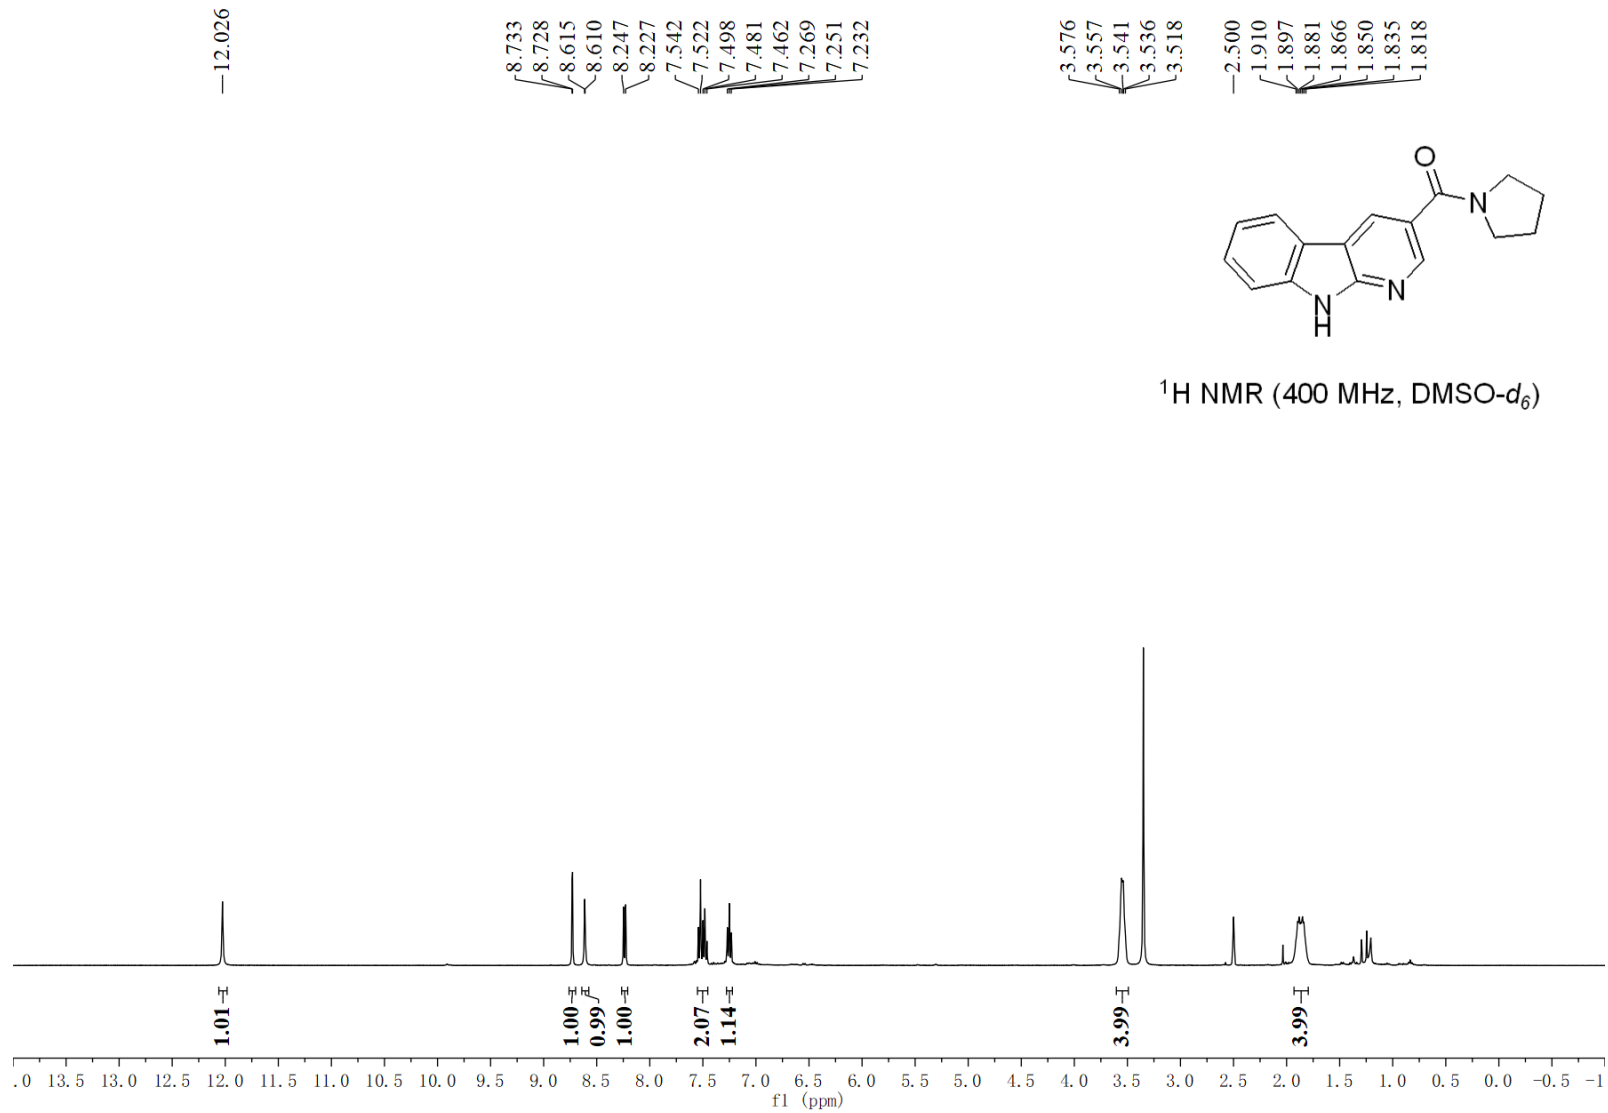

—167.779

~152.552

—145.972

~139.790

~128.162

~127.477

~124.729

~122.003

~120.871

~120.294

~114.696

~111.900

~49.670

~46.666

~26.547

~24.473

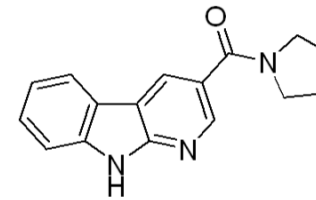

<sup>13</sup>C NMR (100 MHz, DMSO-d<sub>6</sub>)

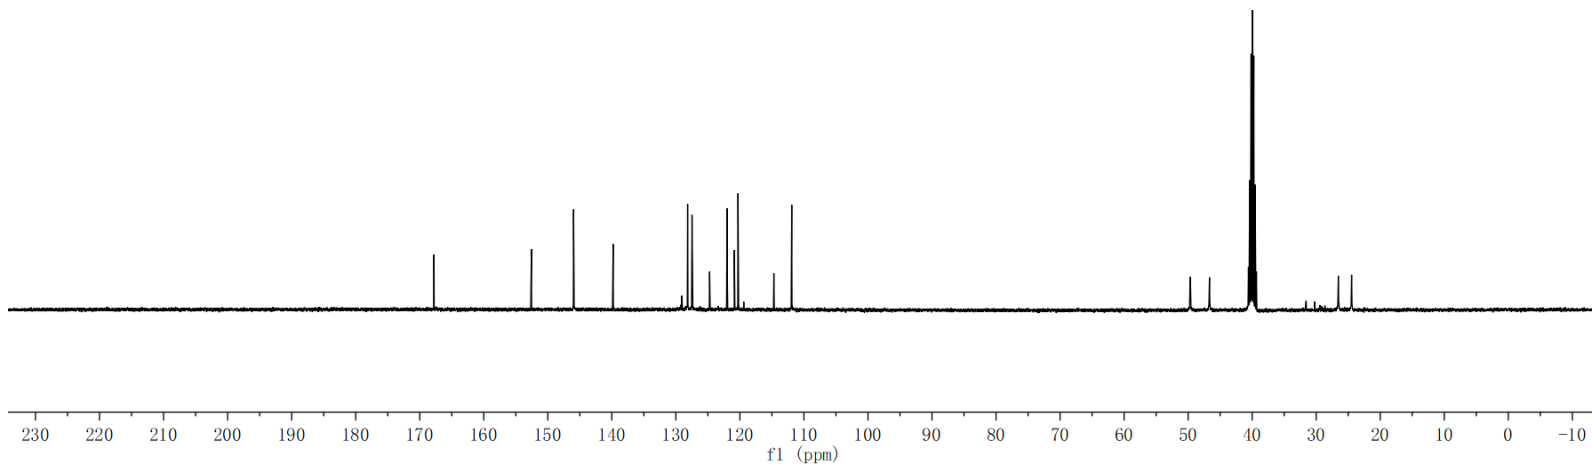

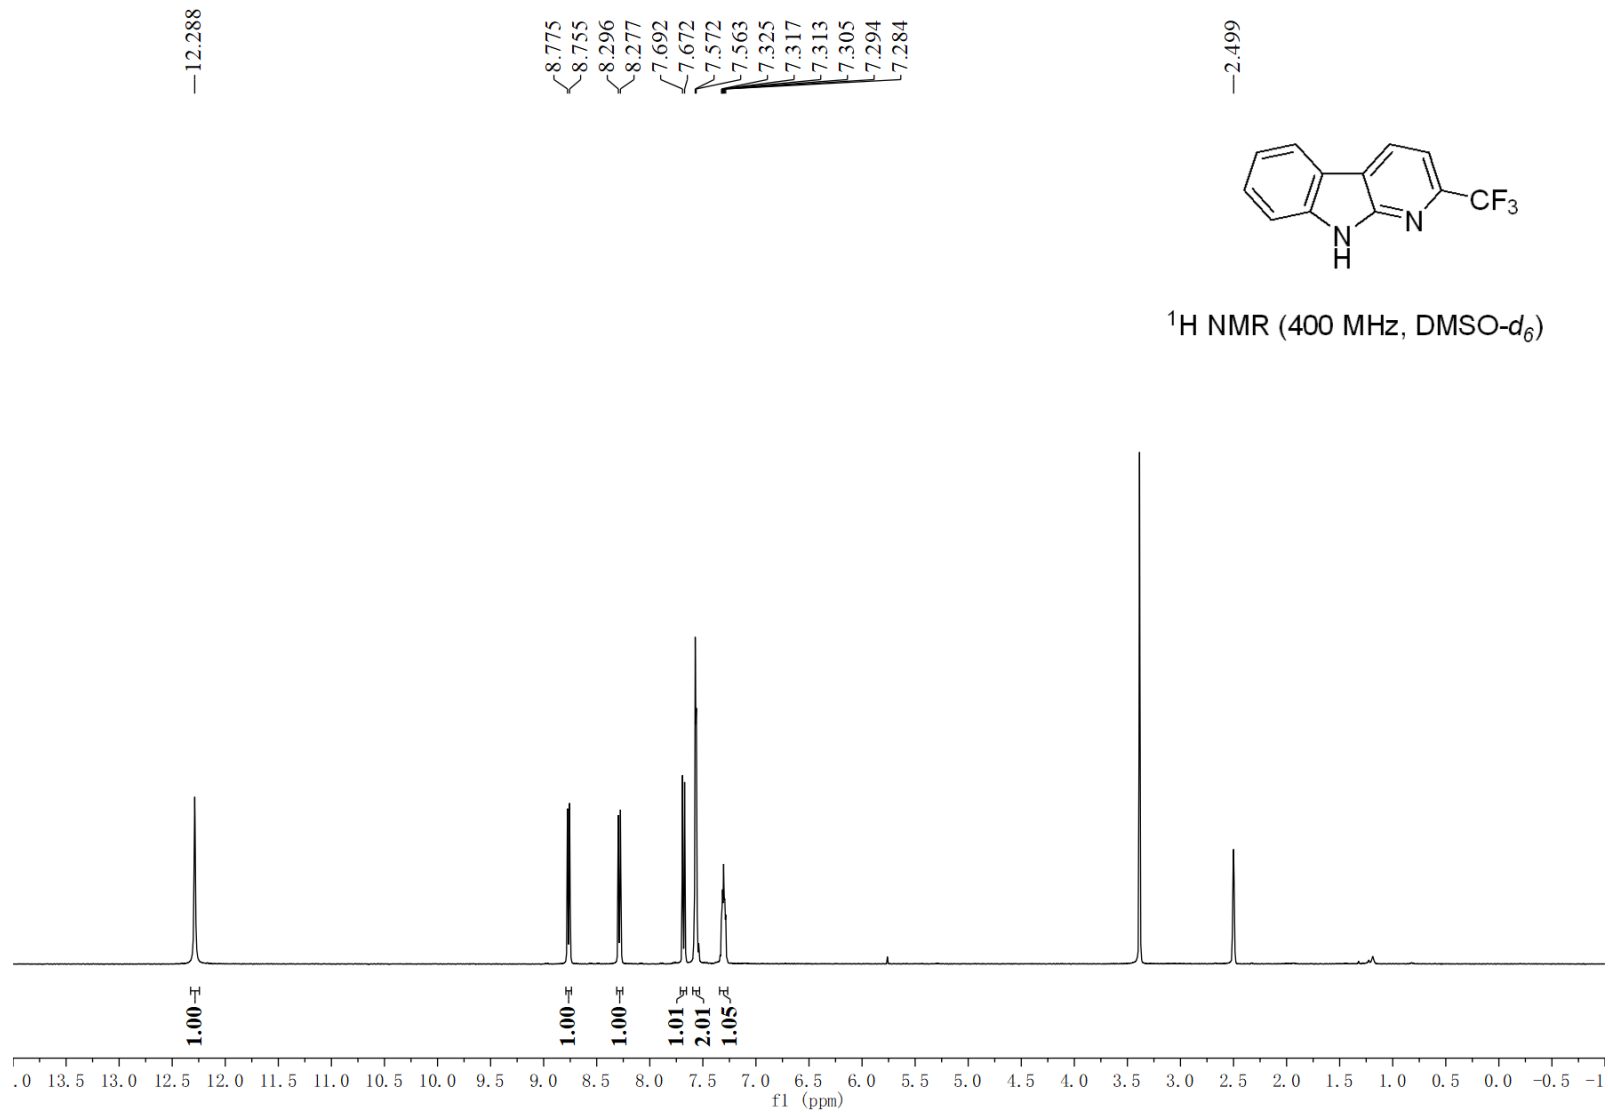

151.413  
142.693  
142.360  
140.578  
130.199  
128.709  
124.165  
122.602  
120.659  
119.905  
118.879  
112.097  
111.690  
111.661  
111.631  
111.600

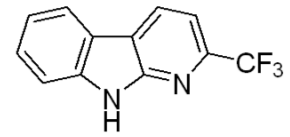

<sup>13</sup>C NMR (100 MHz, DMSO-d<sub>6</sub>)

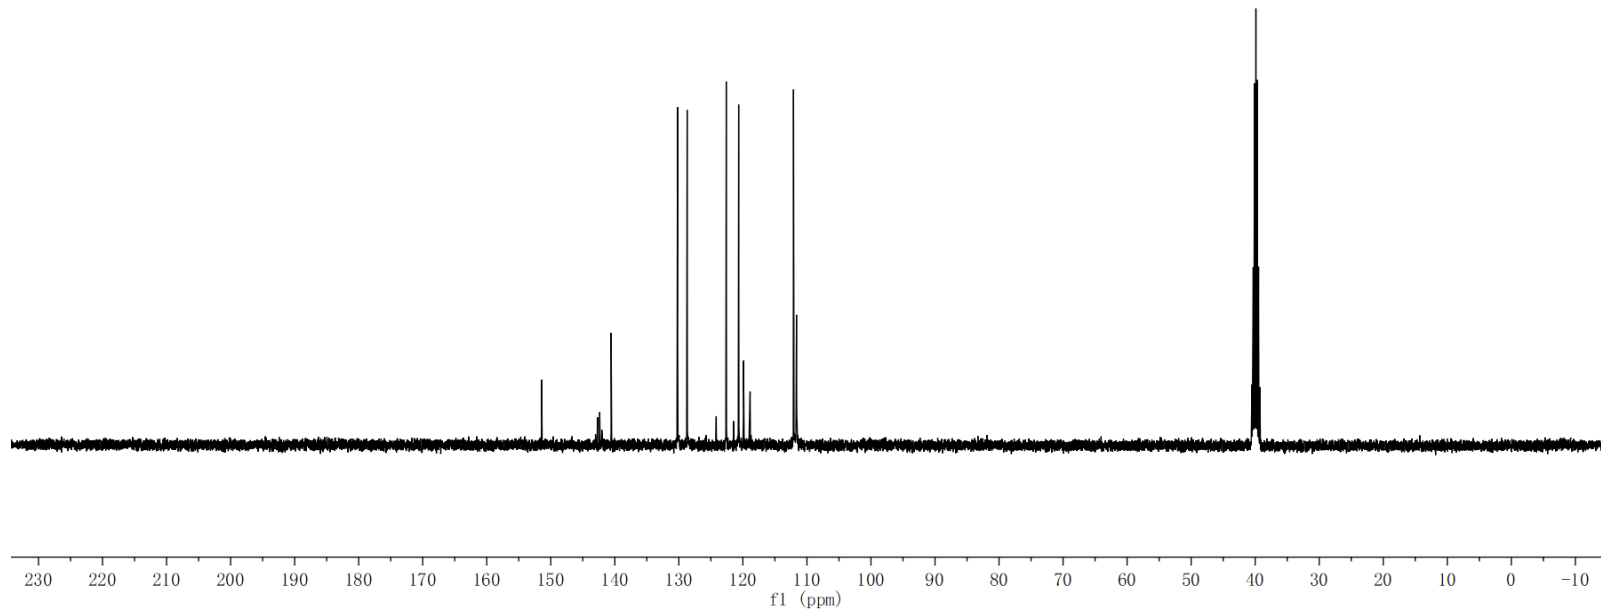

—64.794

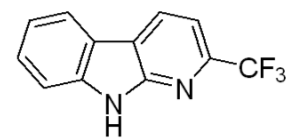

$^{19}\text{F}$  NMR (301 MHz,  $\text{DMSO-}d_6$ )

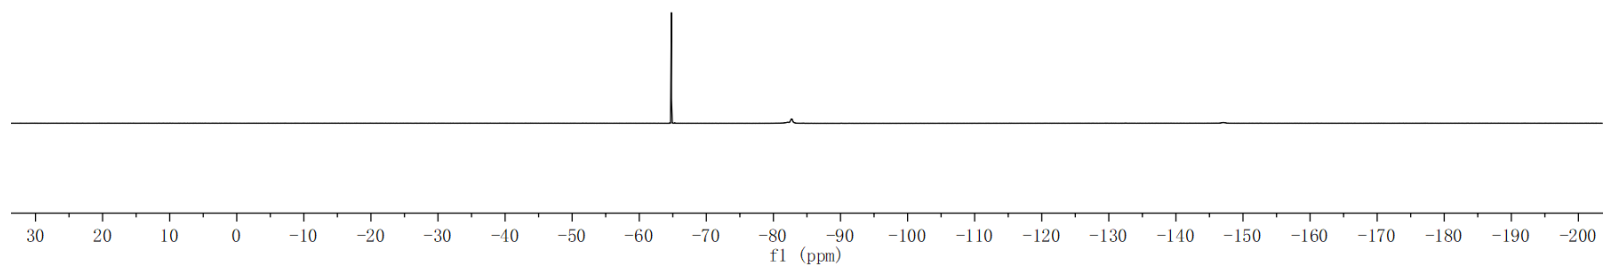



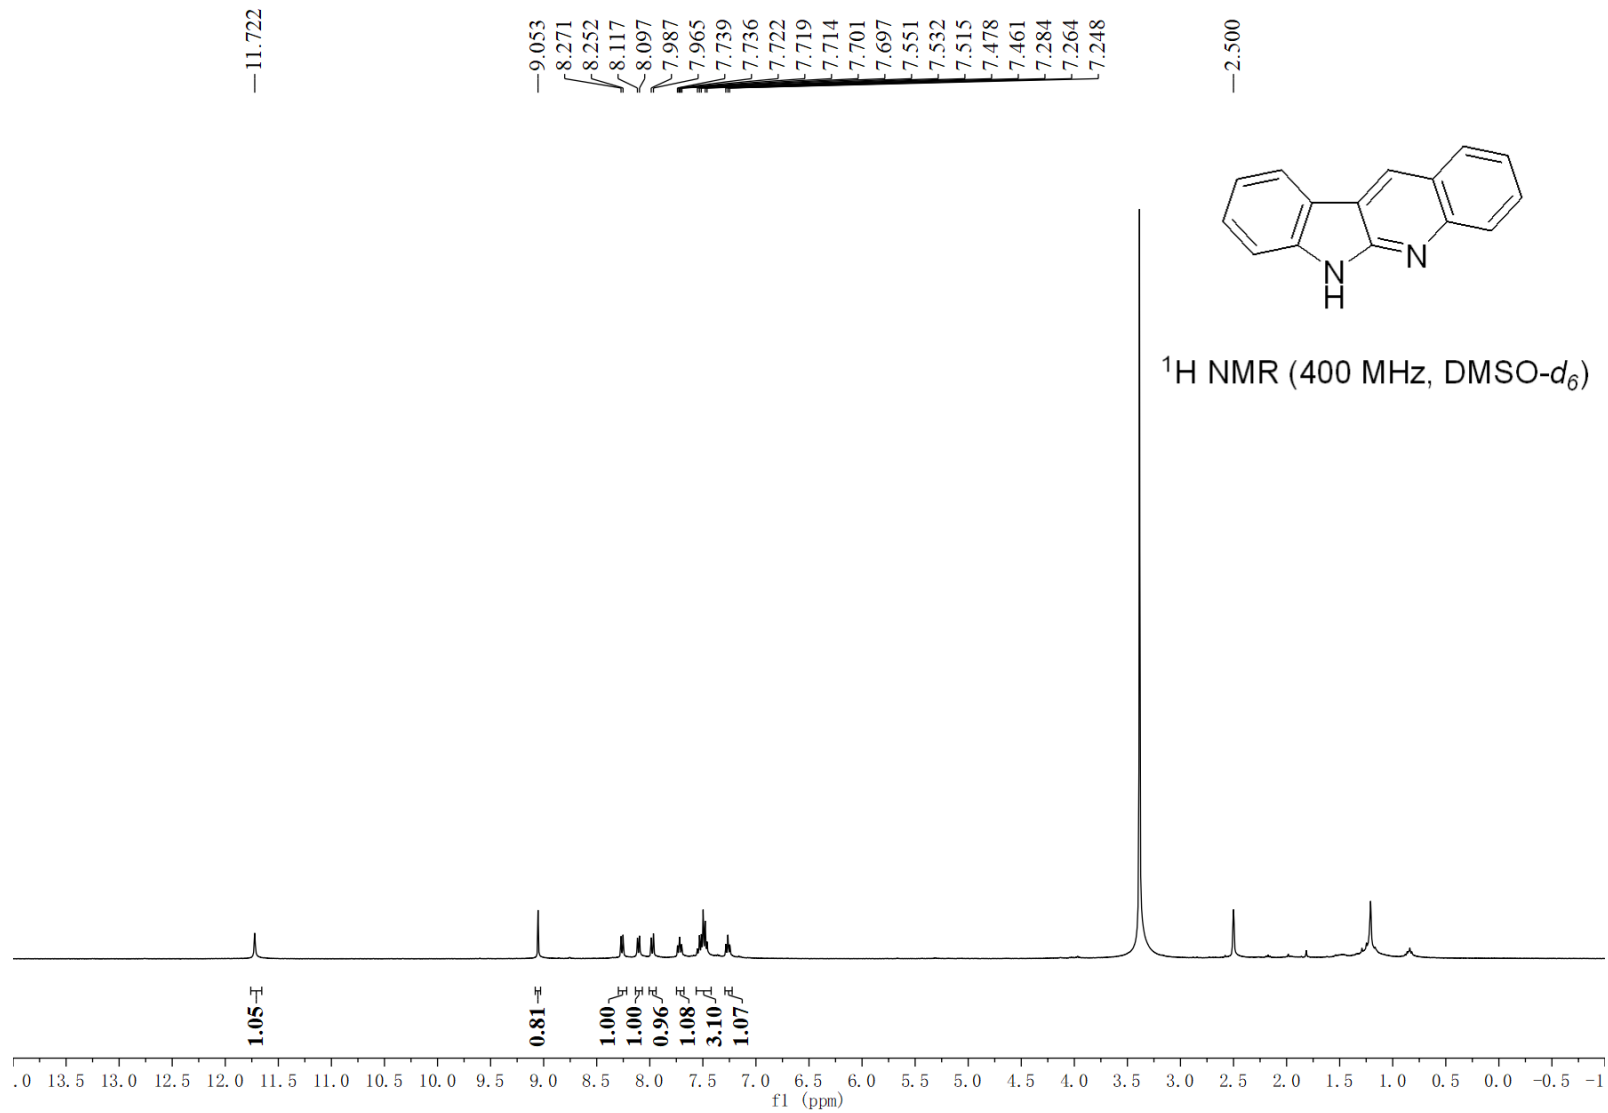

153.280  
146.698  
141.860  
129.115  
129.090  
128.636  
128.014  
127.394  
124.085  
123.165  
122.270  
120.697  
120.094  
118.319  
111.348

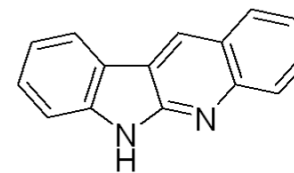

$^{13}\text{C}$  NMR (100 MHz,  $\text{DMSO-}d_6$ )

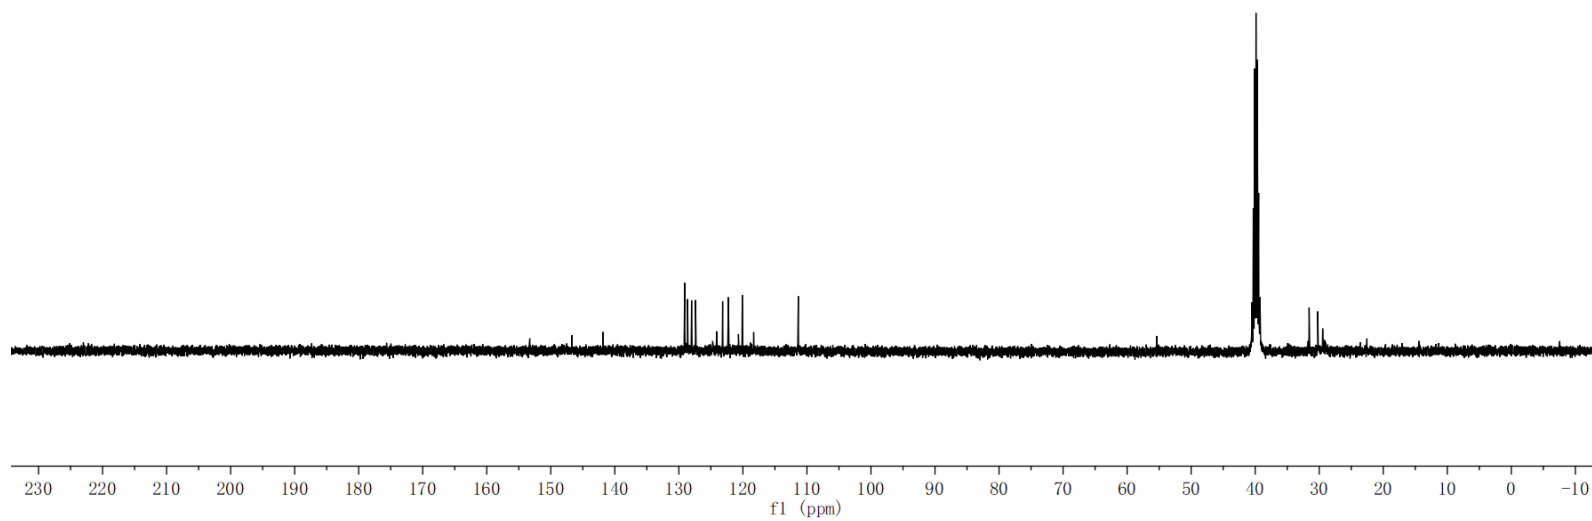

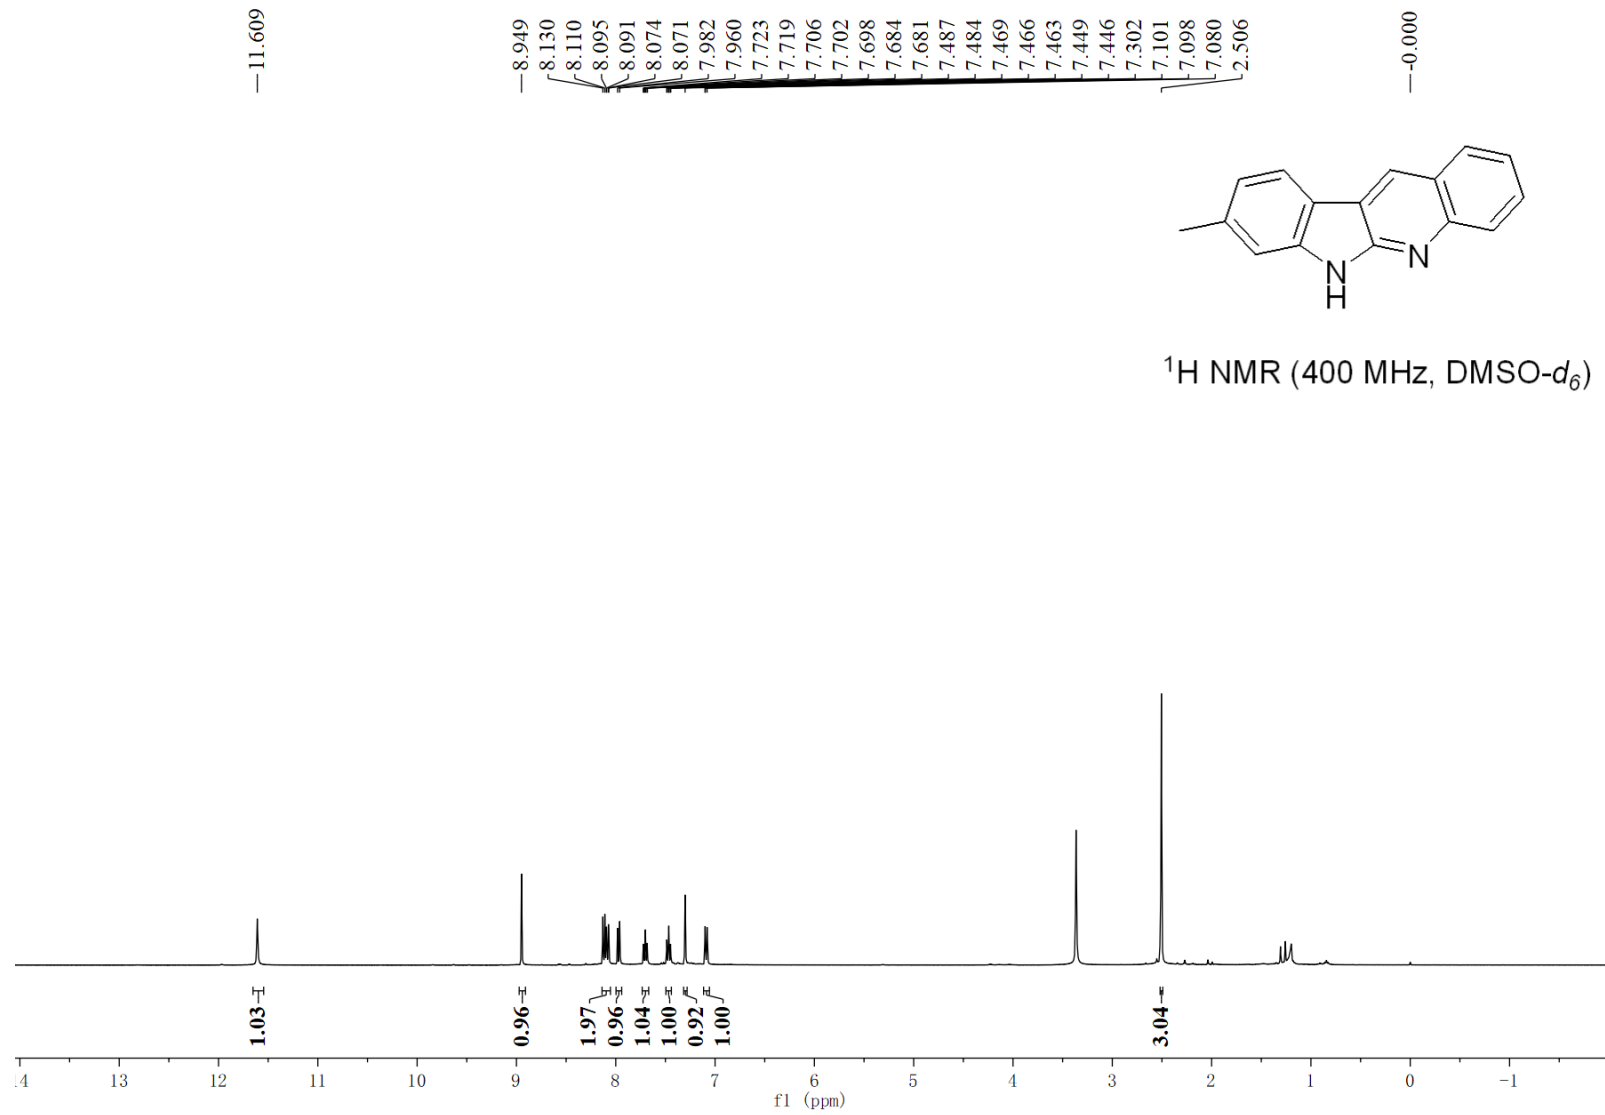

153.549  
146.456  
142.331  
138.566  
128.947  
128.789  
127.389  
127.162  
124.160  
123.067  
121.985  
121.400  
118.480  
118.331  
111.527

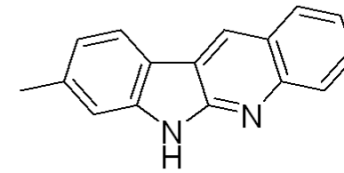

22.302

$^{13}\text{C}$  NMR (100 MHz,  $\text{DMSO-}d_6$ )

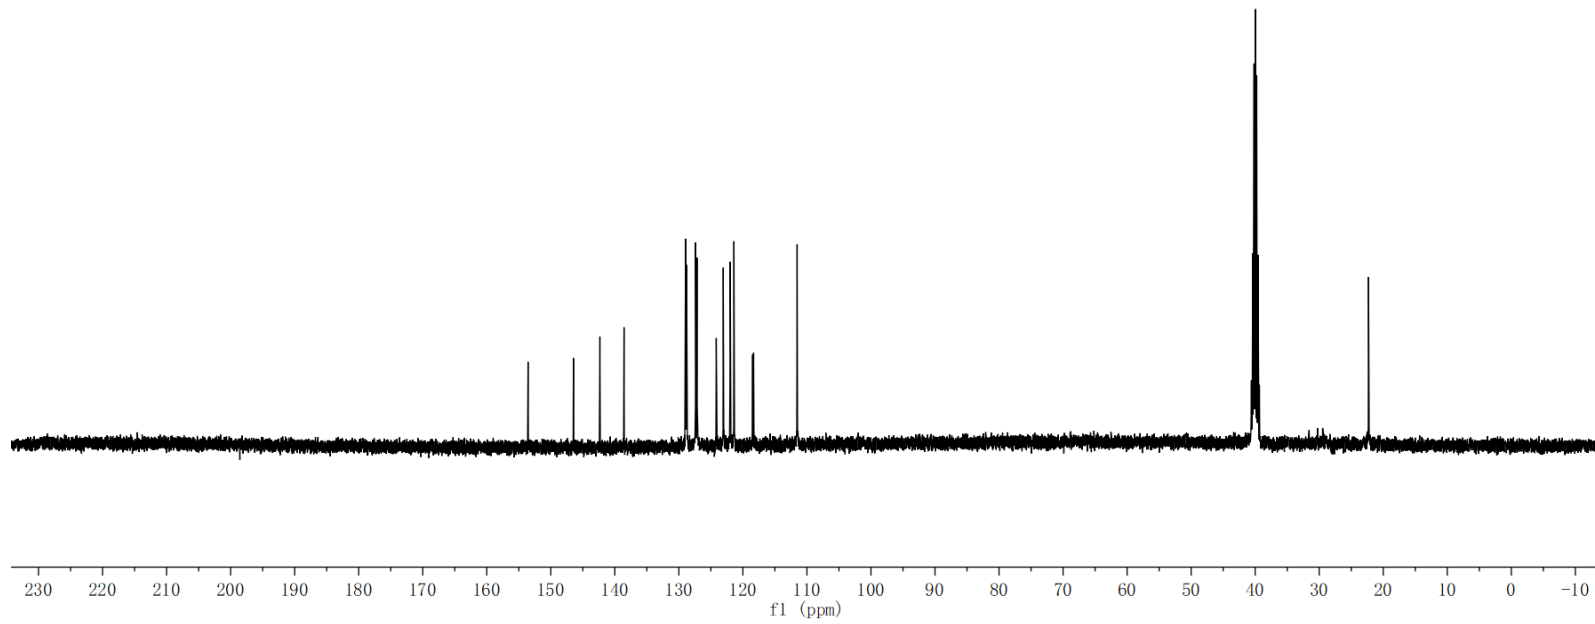

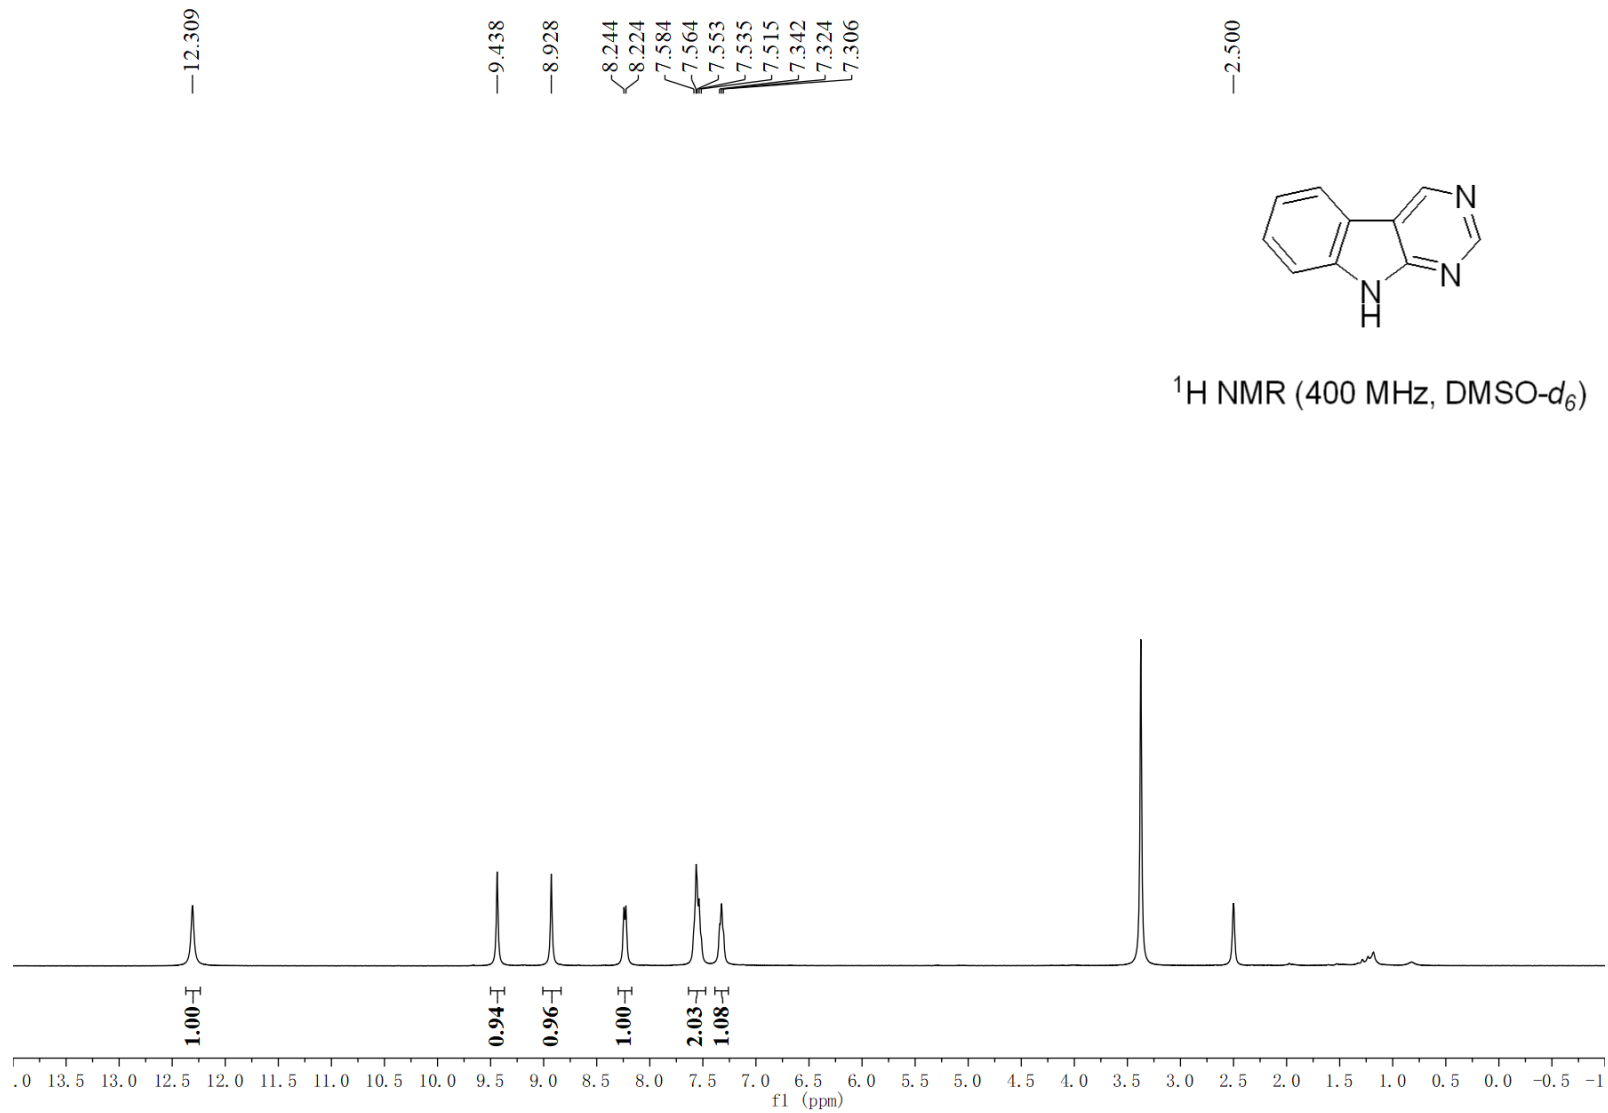

155.523  
154.855  
148.958  
138.849  
128.145  
122.111  
121.363  
119.222  
114.272  
112.294

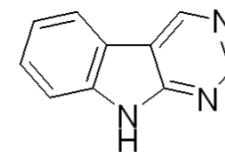

$^1\text{H}$  NMR (400 MHz, DMSO- $d_6$ )

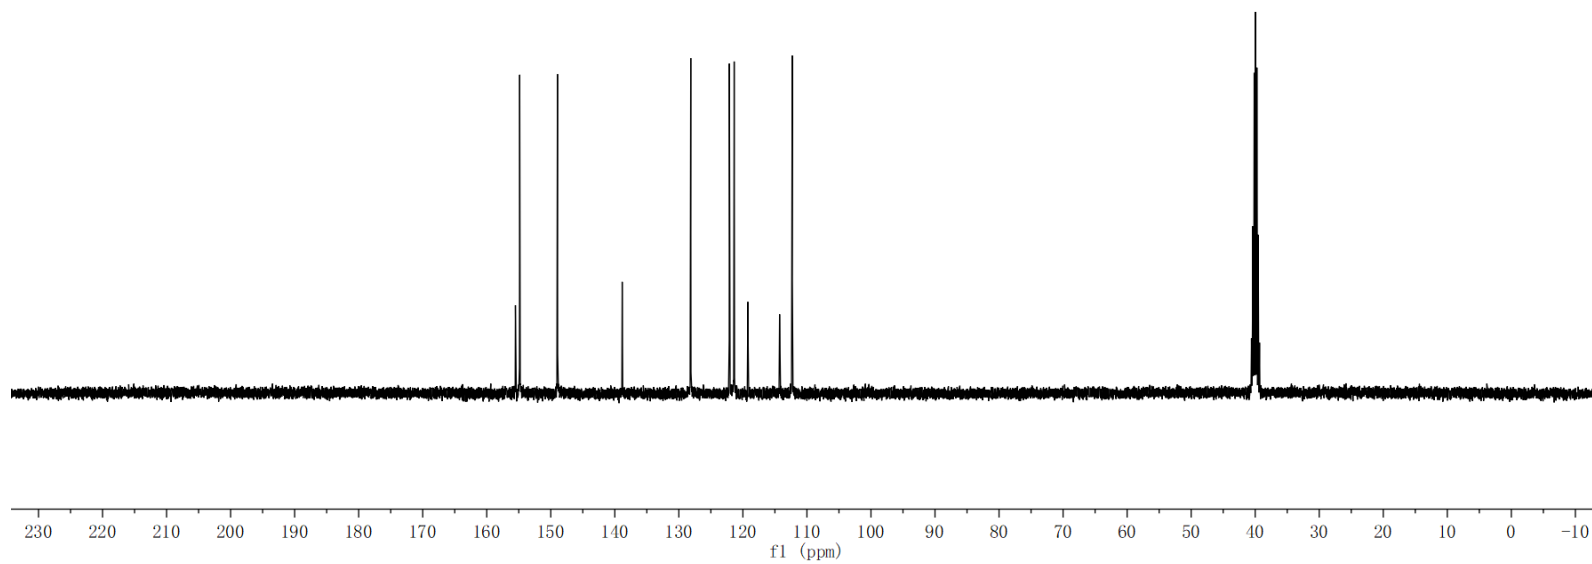

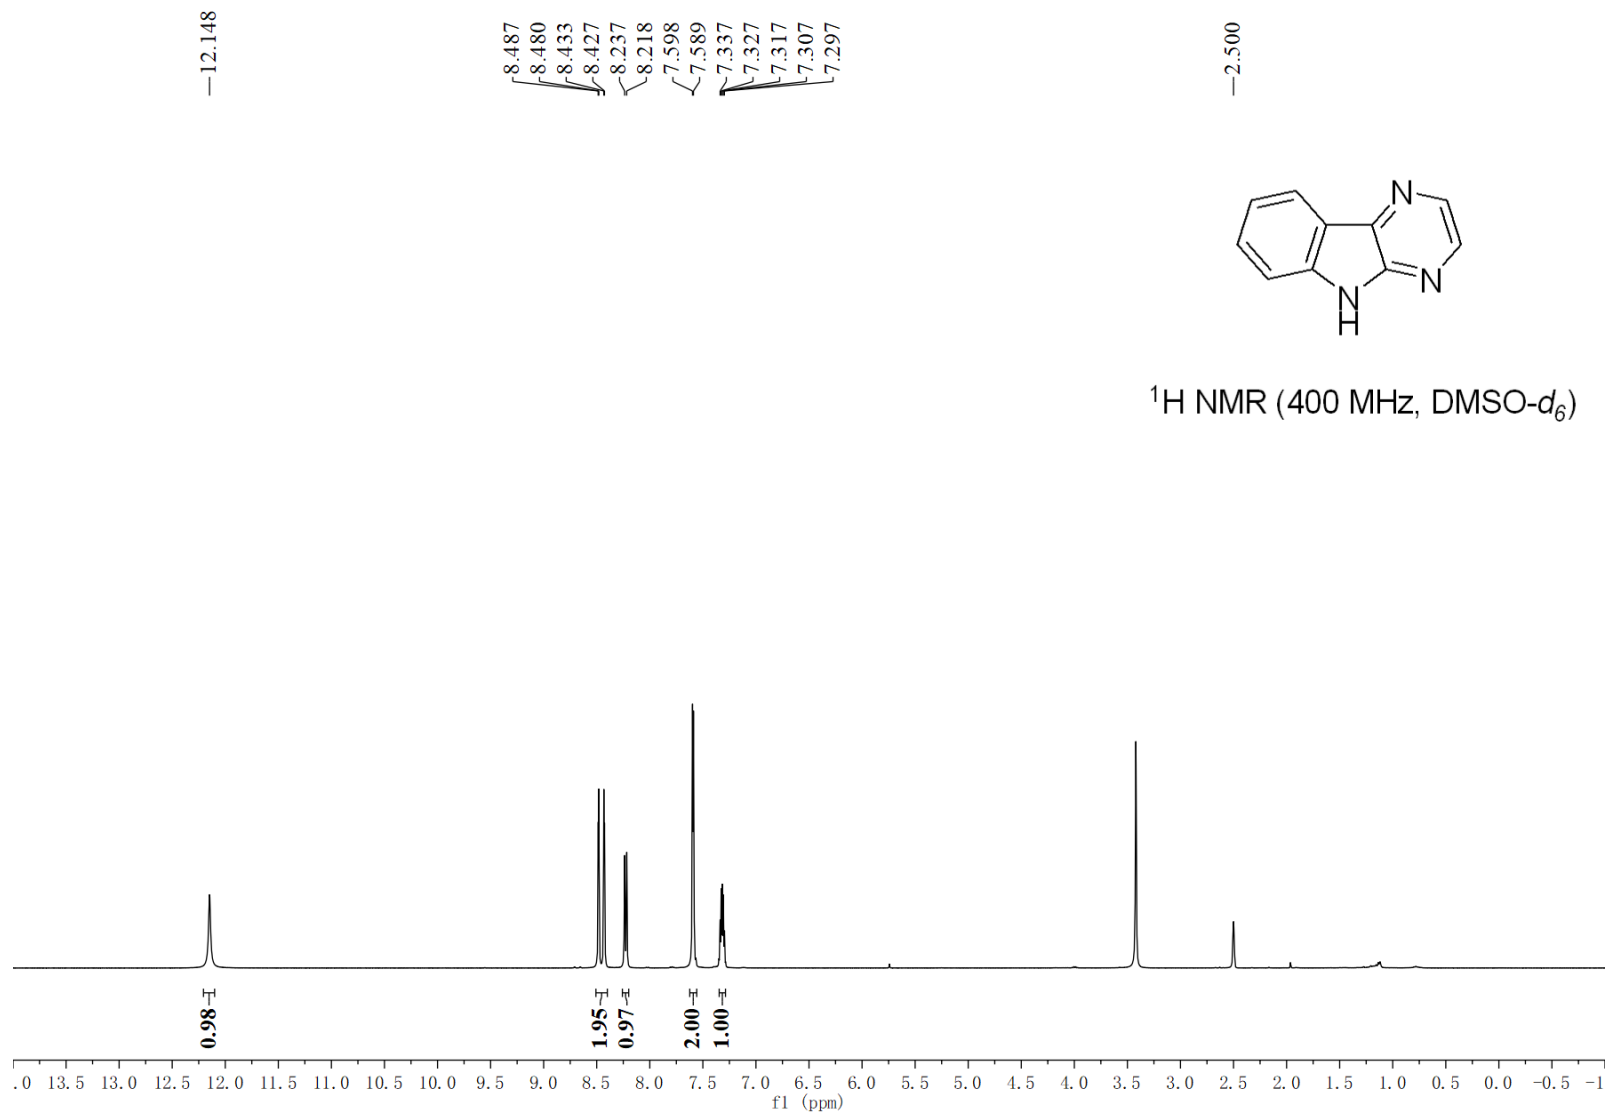

145.924  
140.678  
140.343  
136.868  
135.632  
129.397  
121.389  
120.881  
119.733  
112.526

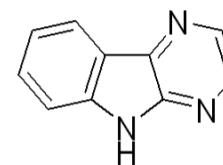

$^{13}\text{C}$  NMR (100 MHz, DMSO- $d_6$ )

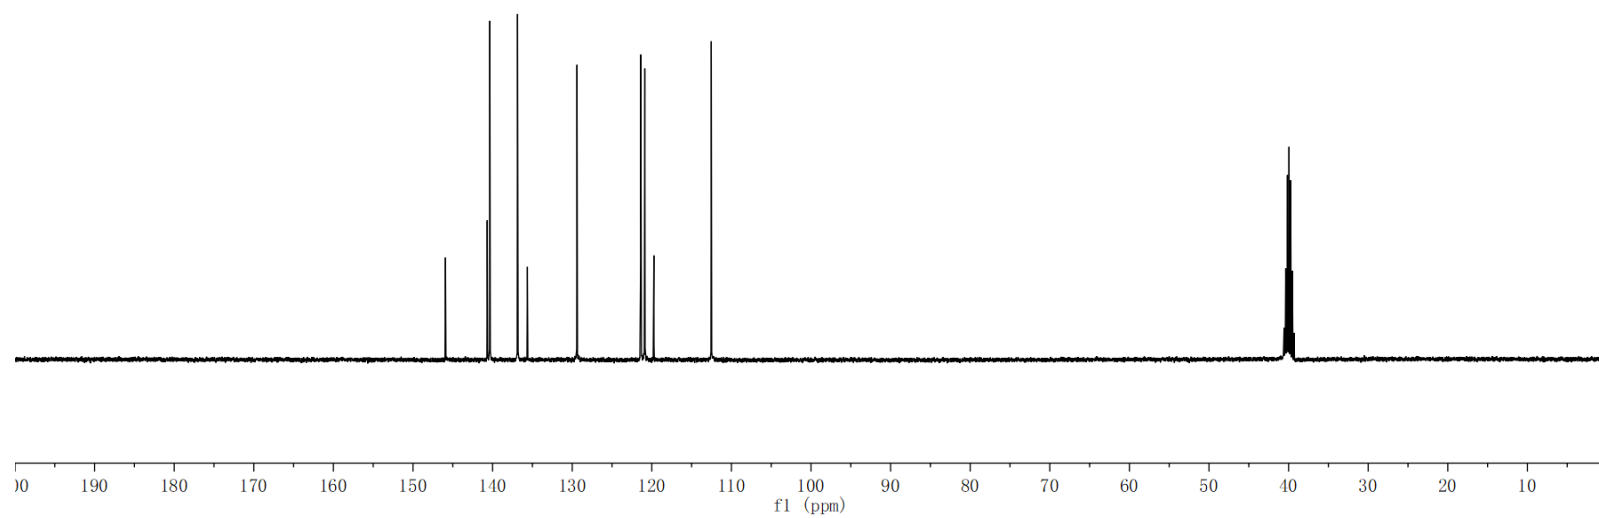



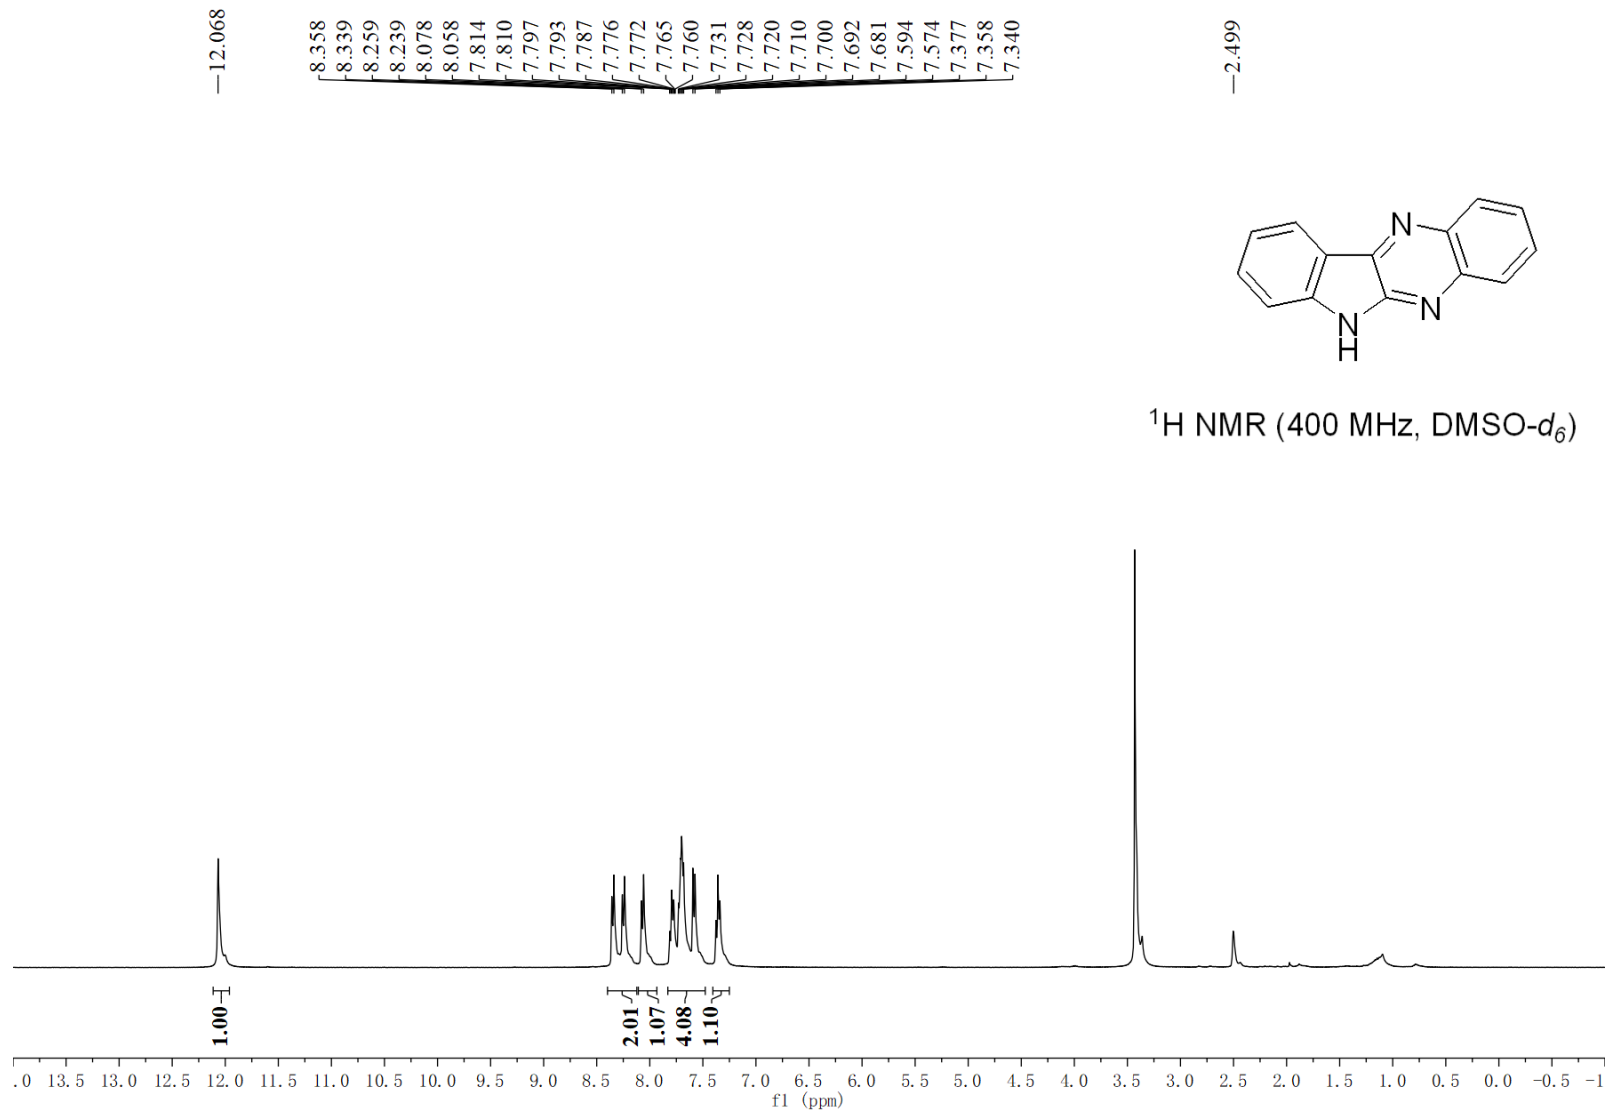

146.242  
144.402  
140.545  
140.192  
138.983  
131.734  
129.460  
129.157  
127.896  
126.372  
122.674  
121.113  
119.370  
112.409

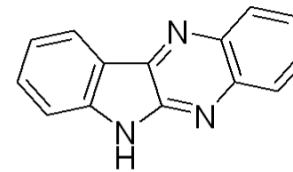

$^{13}\text{C}$  NMR (100 MHz,  $\text{DMSO-}d_6$ )

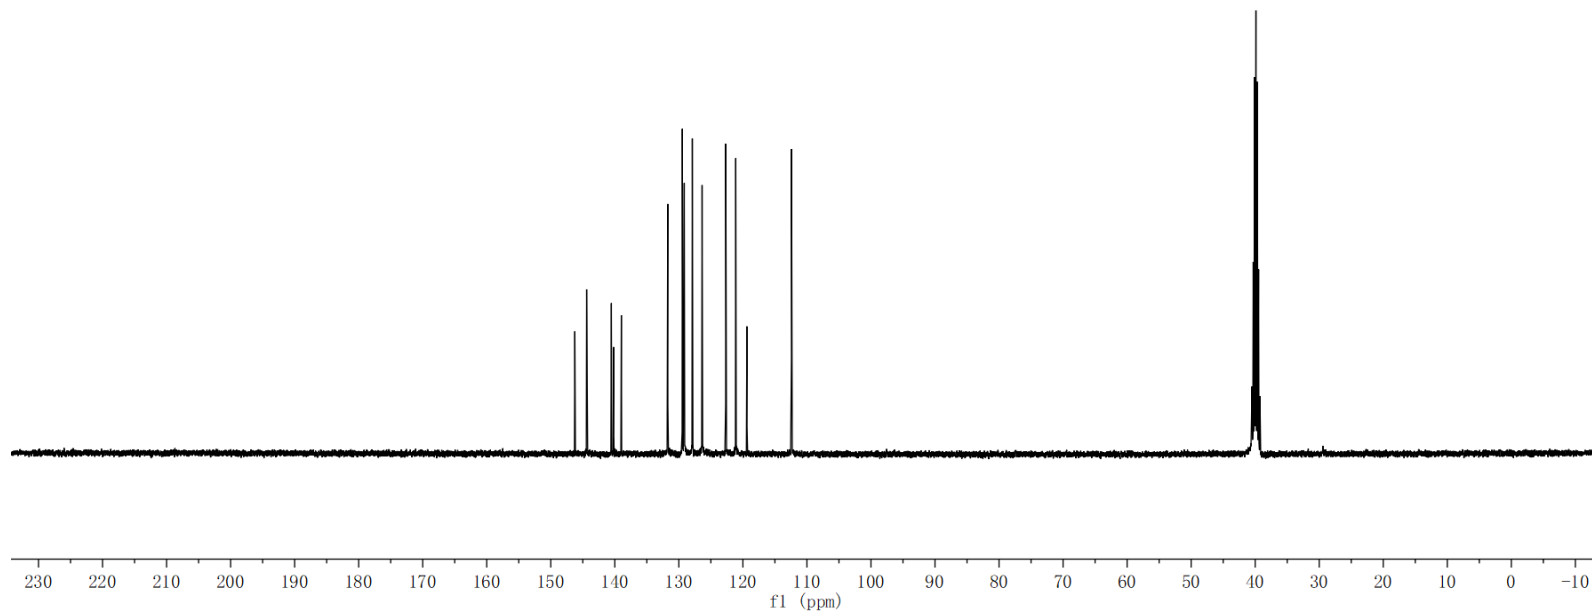

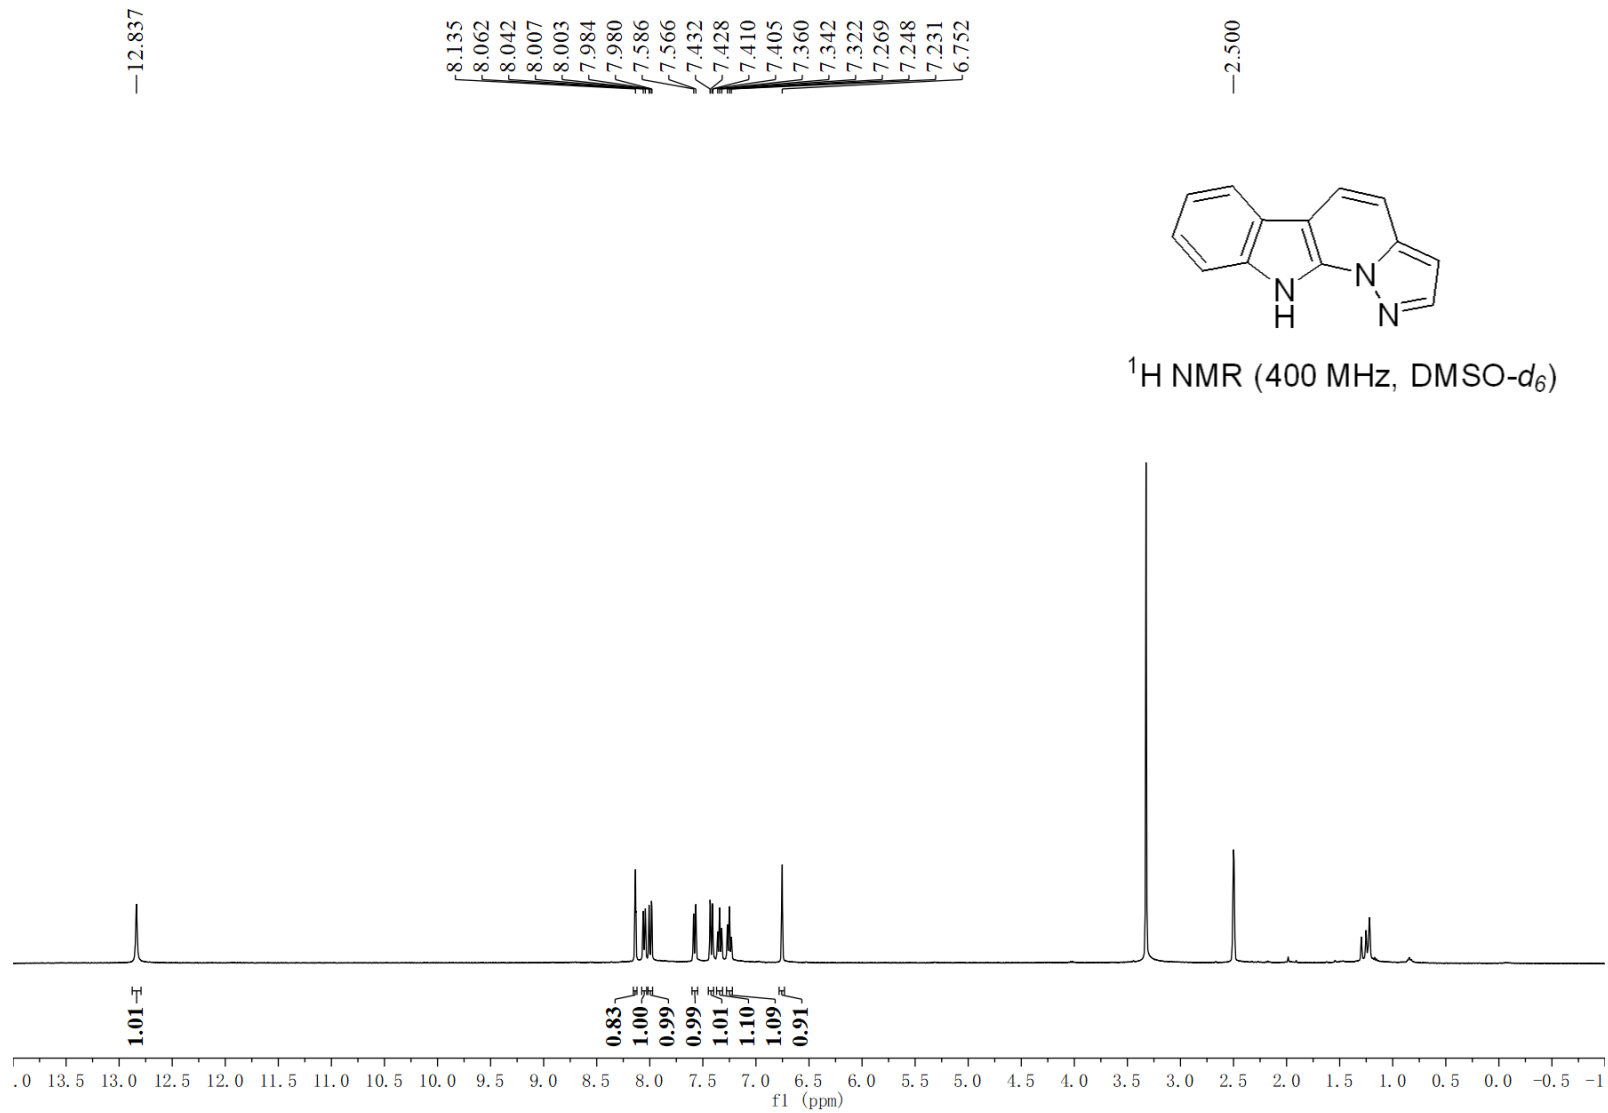

142.130  
140.220  
135.994  
135.340  
124.048  
123.159  
120.916  
119.747  
119.515  
112.508  
108.361  
104.564  
98.172

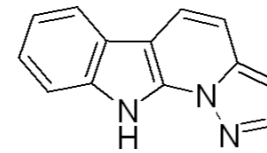

$^{13}\text{C}$  NMR (400 MHz,  $\text{DMSO-}d_6$ )

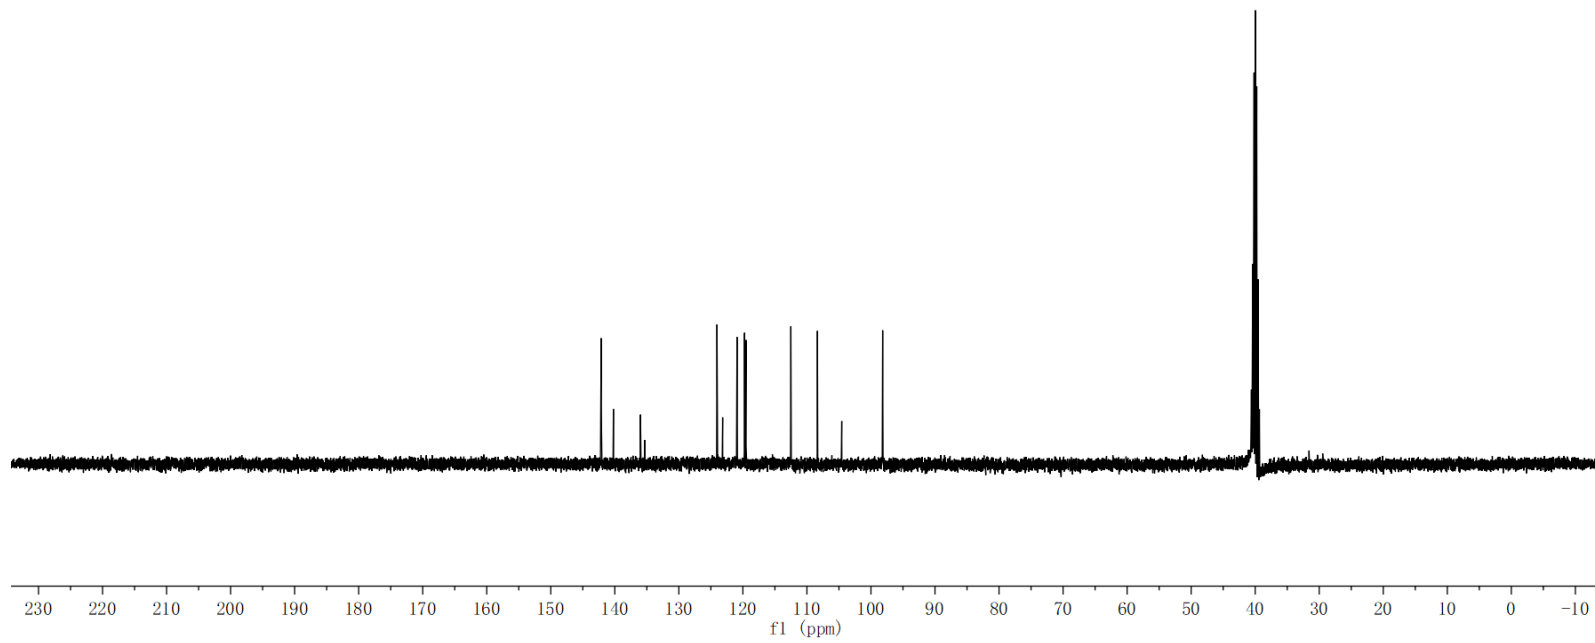

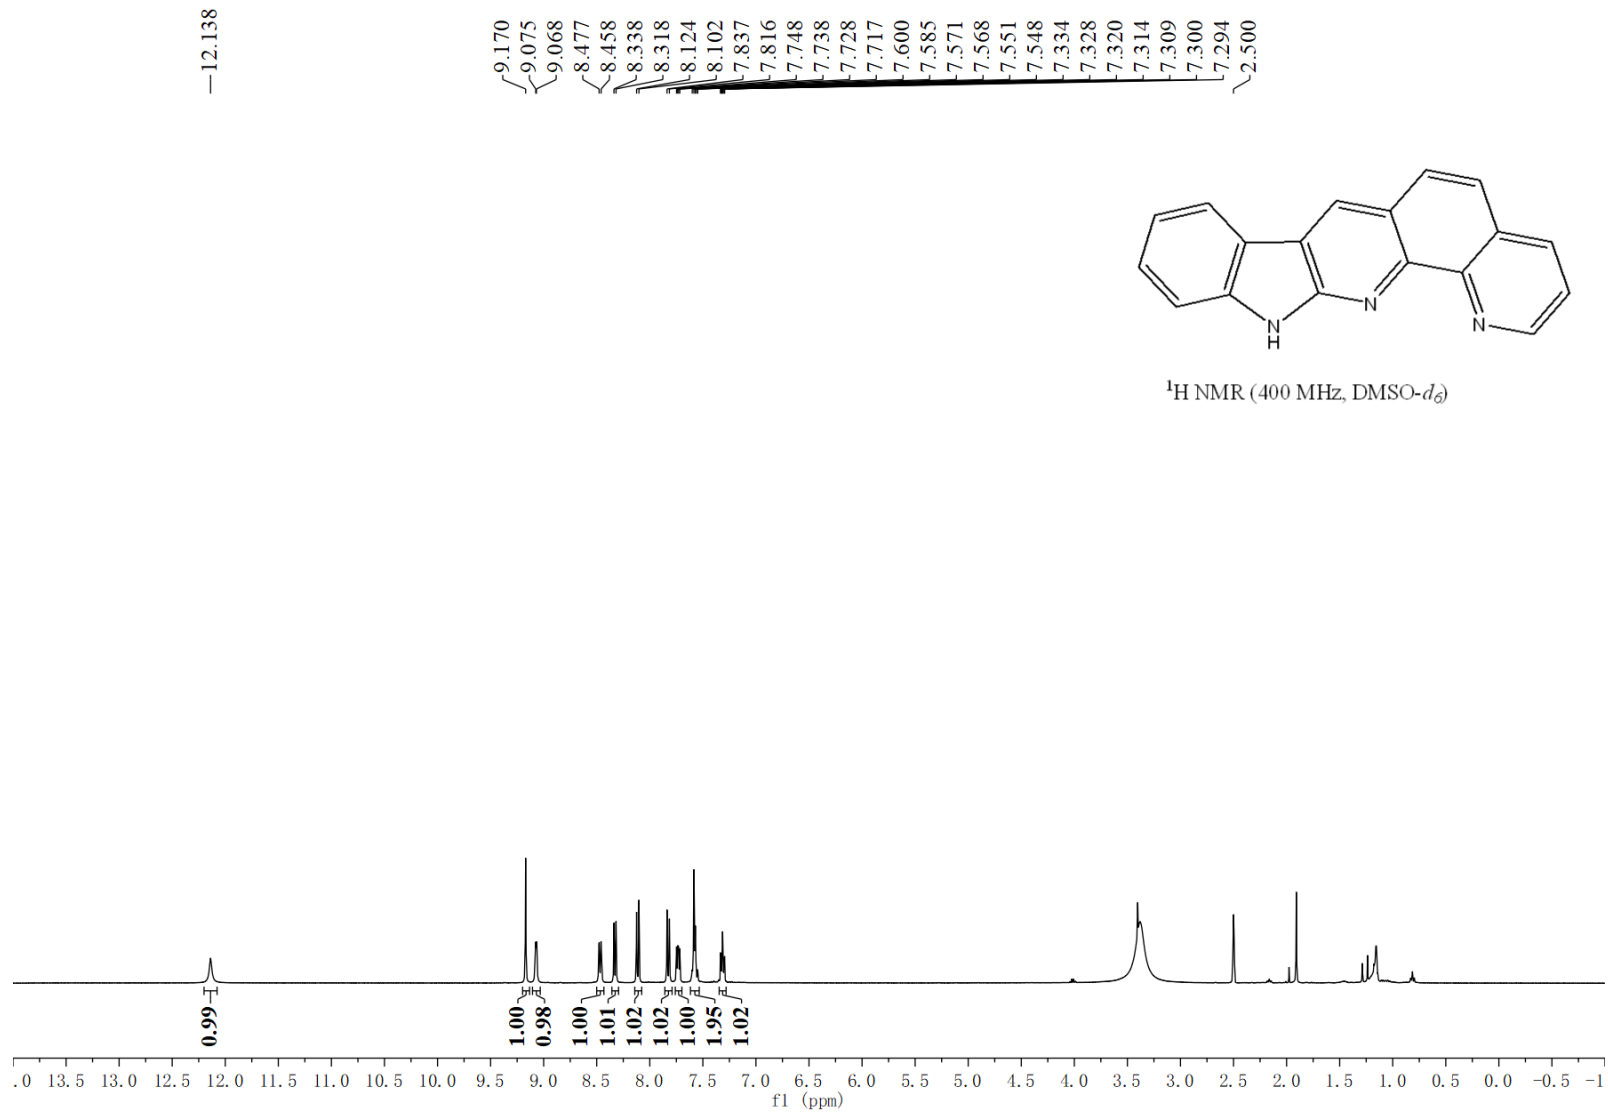

152.798  
149.369  
145.746  
144.164  
141.531  
136.515  
128.885  
128.599  
128.401  
128.186  
123.675  
123.197  
122.858  
122.415  
120.530  
120.281  
118.145  
111.771

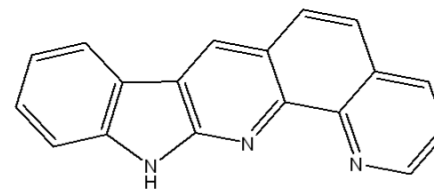

$^{13}\text{C}$  NMR (400 MHz DMSO- $d_6$ )

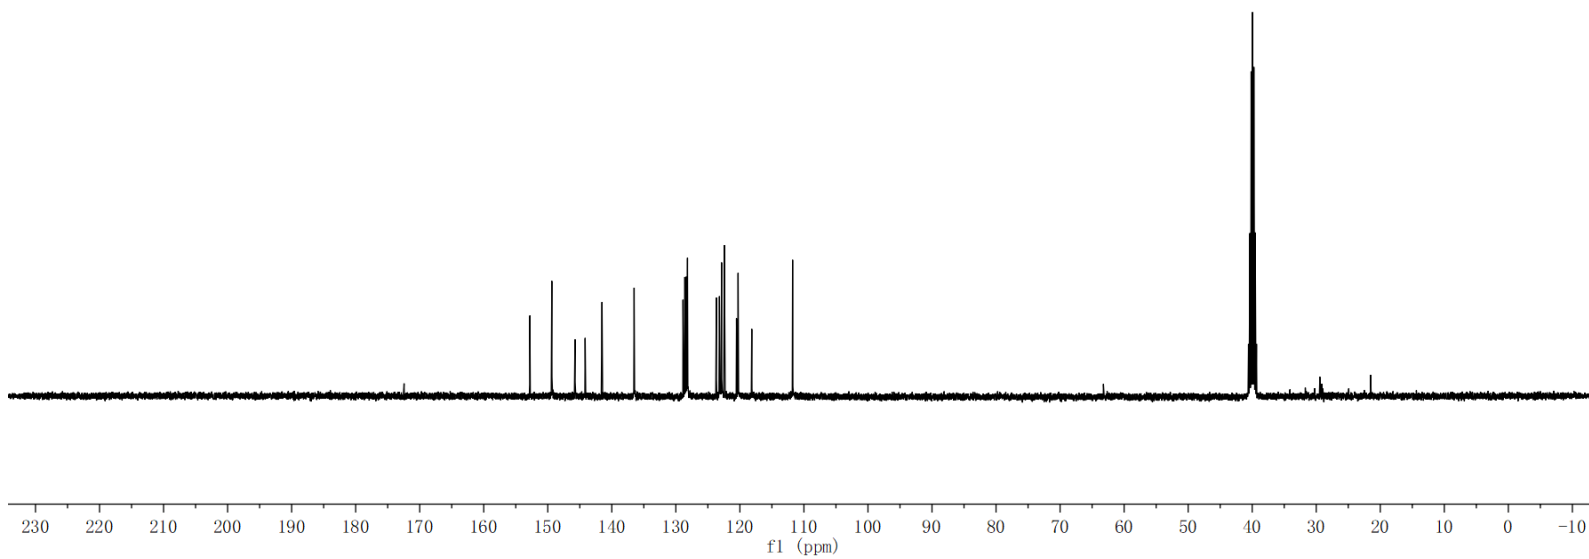

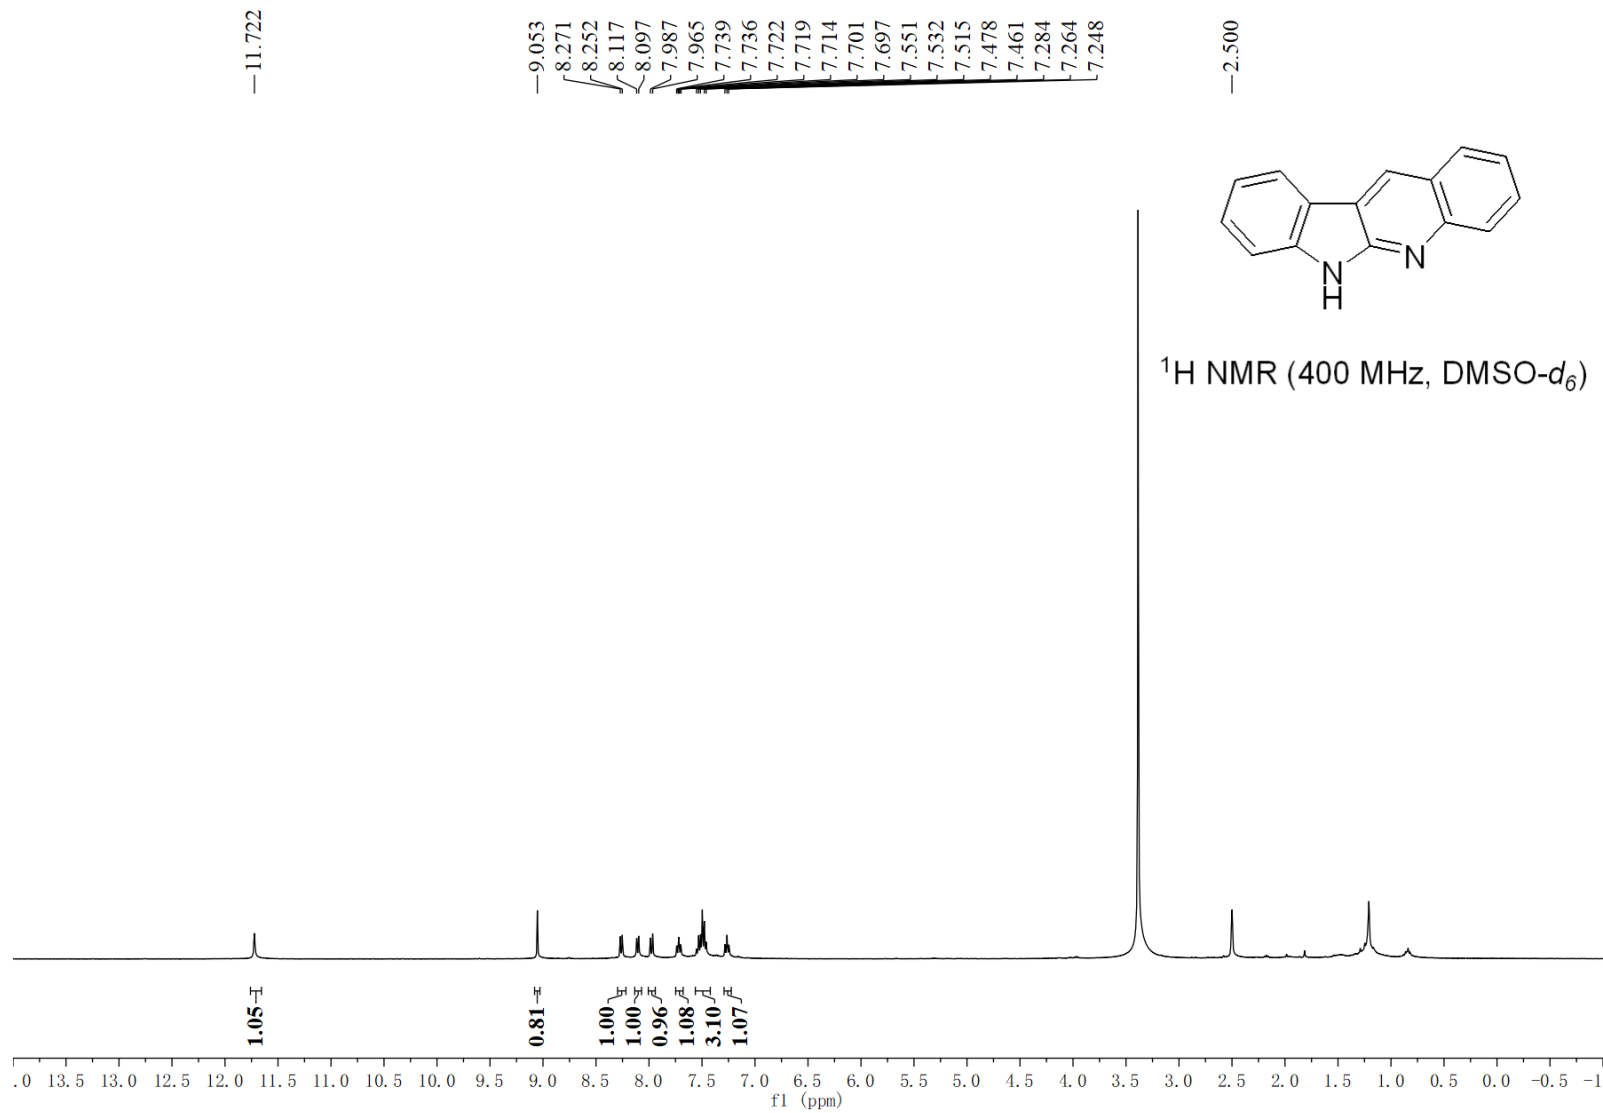

153.280  
146.698  
141.860  
129.115  
129.090  
128.636  
128.014  
127.394  
124.085  
123.165  
122.270  
120.697  
120.094  
118.319  
111.348

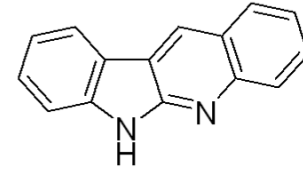

$^{13}\text{C}$  NMR (100 MHz,  $\text{DMSO-}d_6$ )

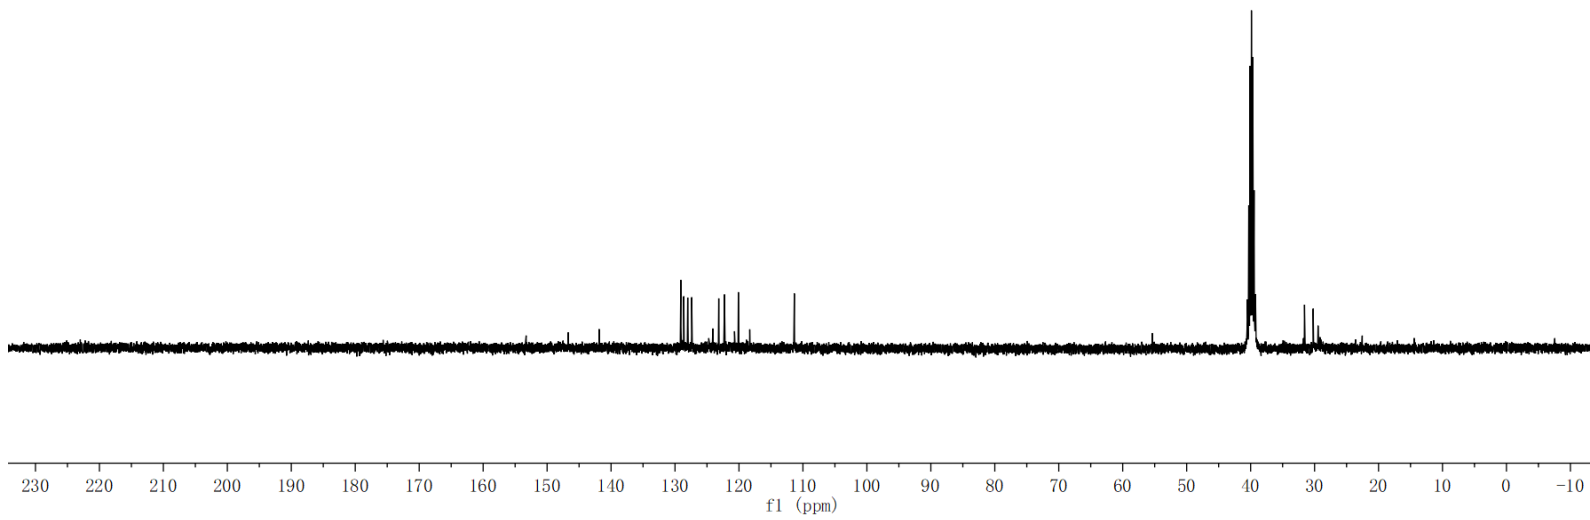



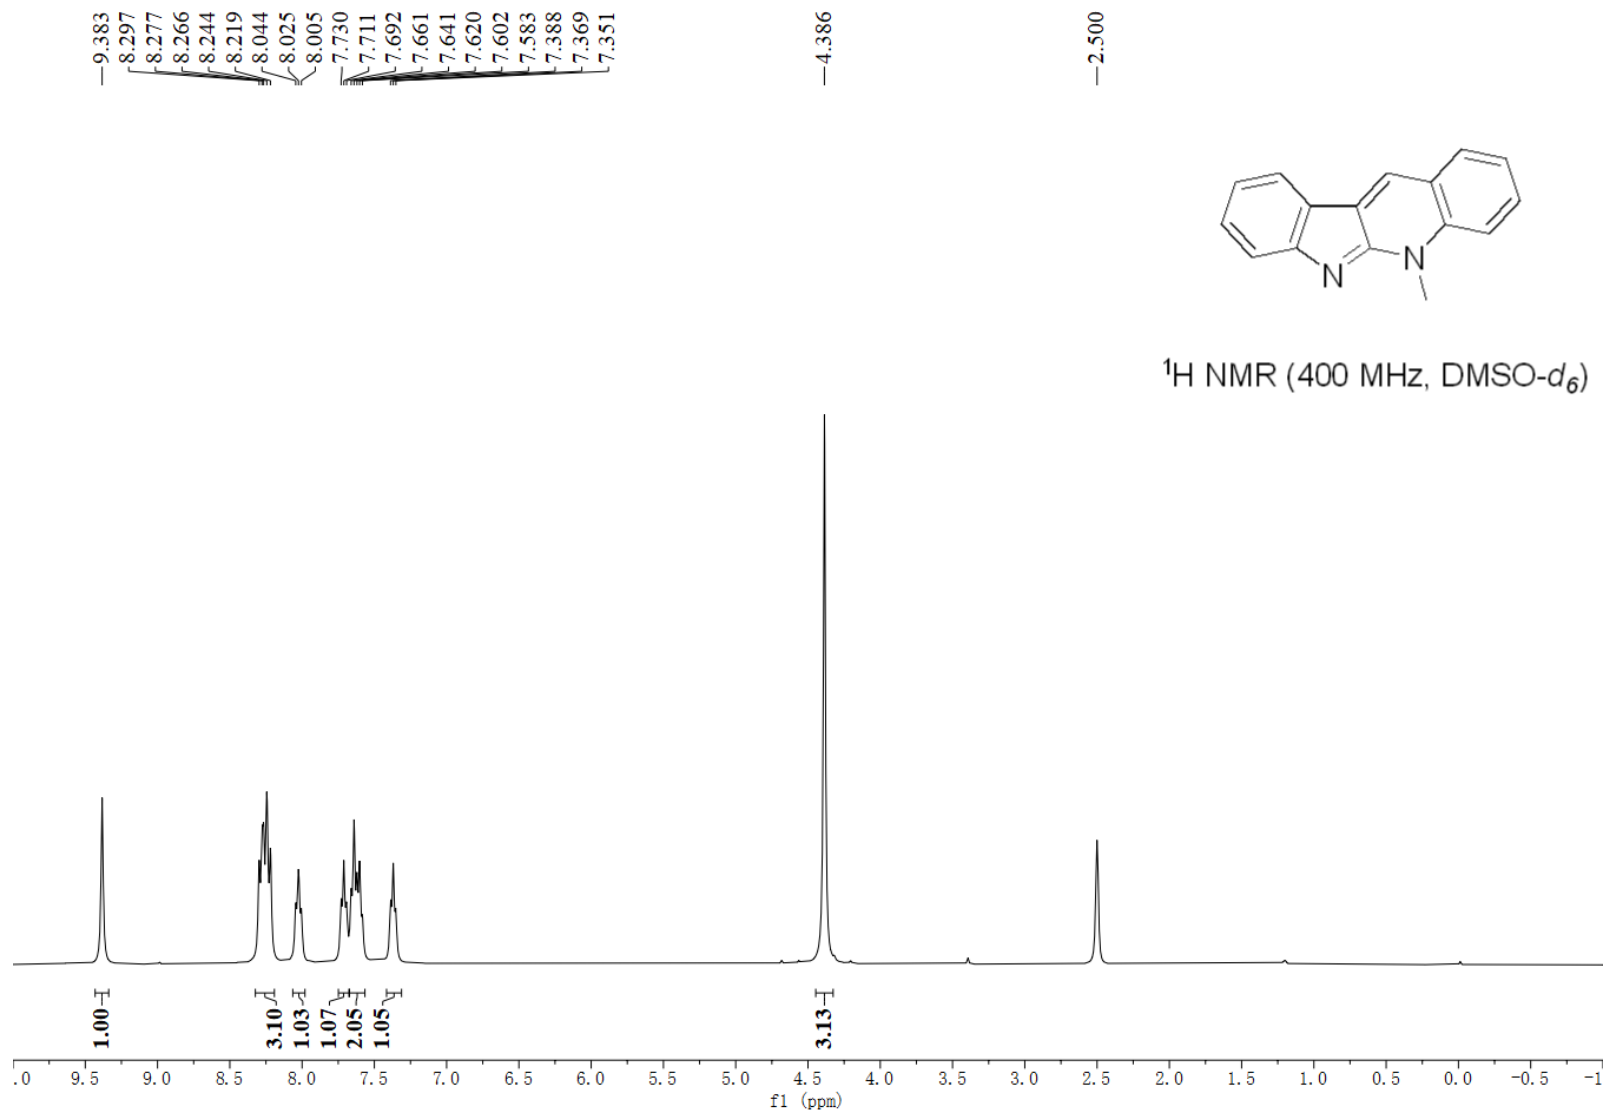

155.461  
150.547  
141.204  
138.416  
137.648  
135.681  
134.853  
129.658  
128.732  
127.212  
127.156  
127.050  
126.516  
121.312  
119.455

40.502

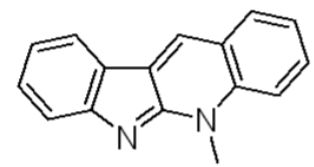

<sup>13</sup>C NMR (100 MHz, DMSO-d<sub>6</sub>)

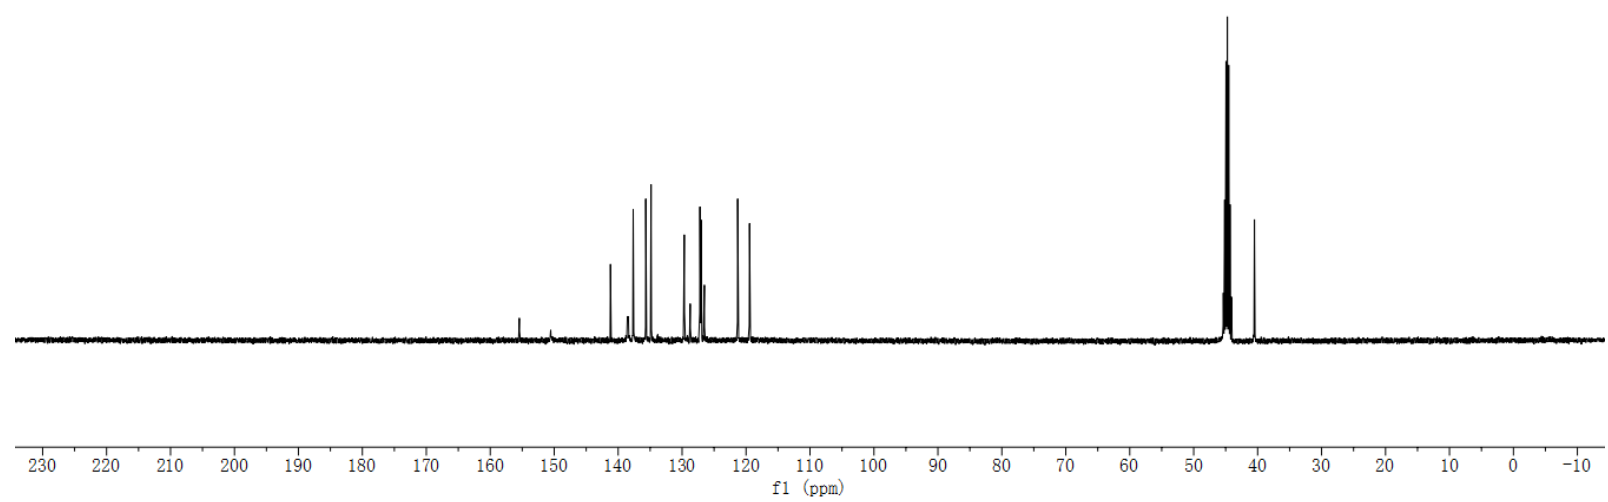

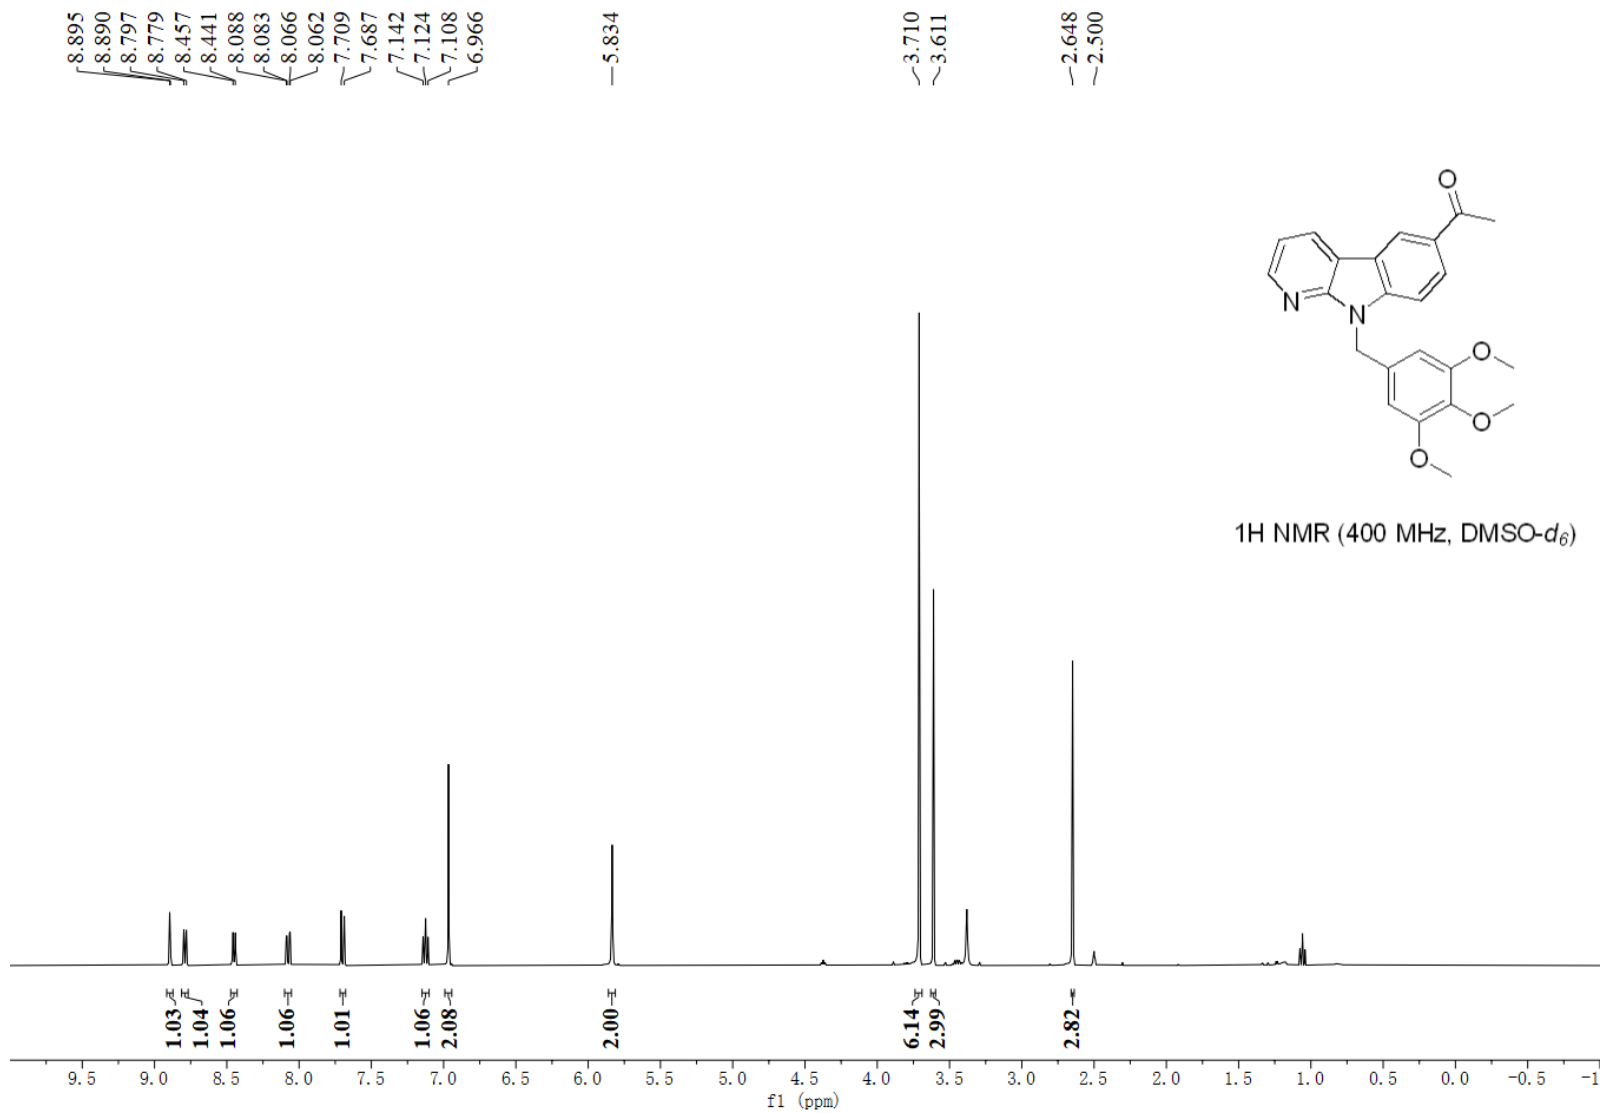

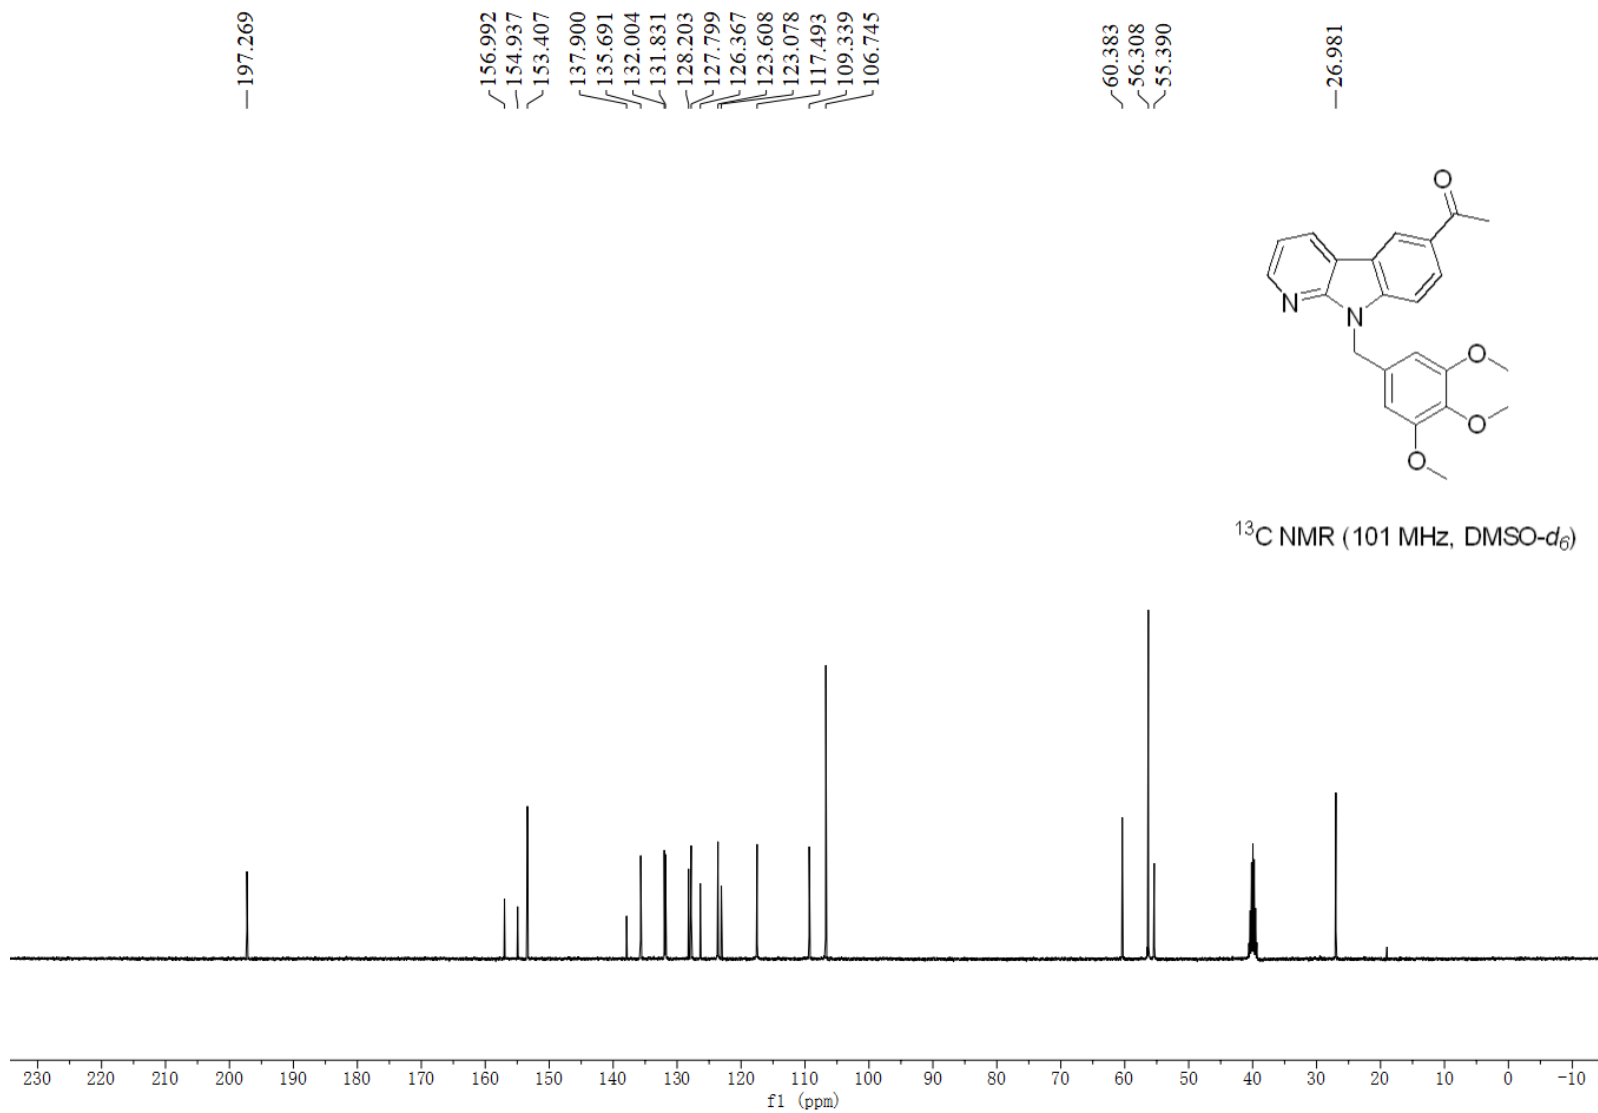

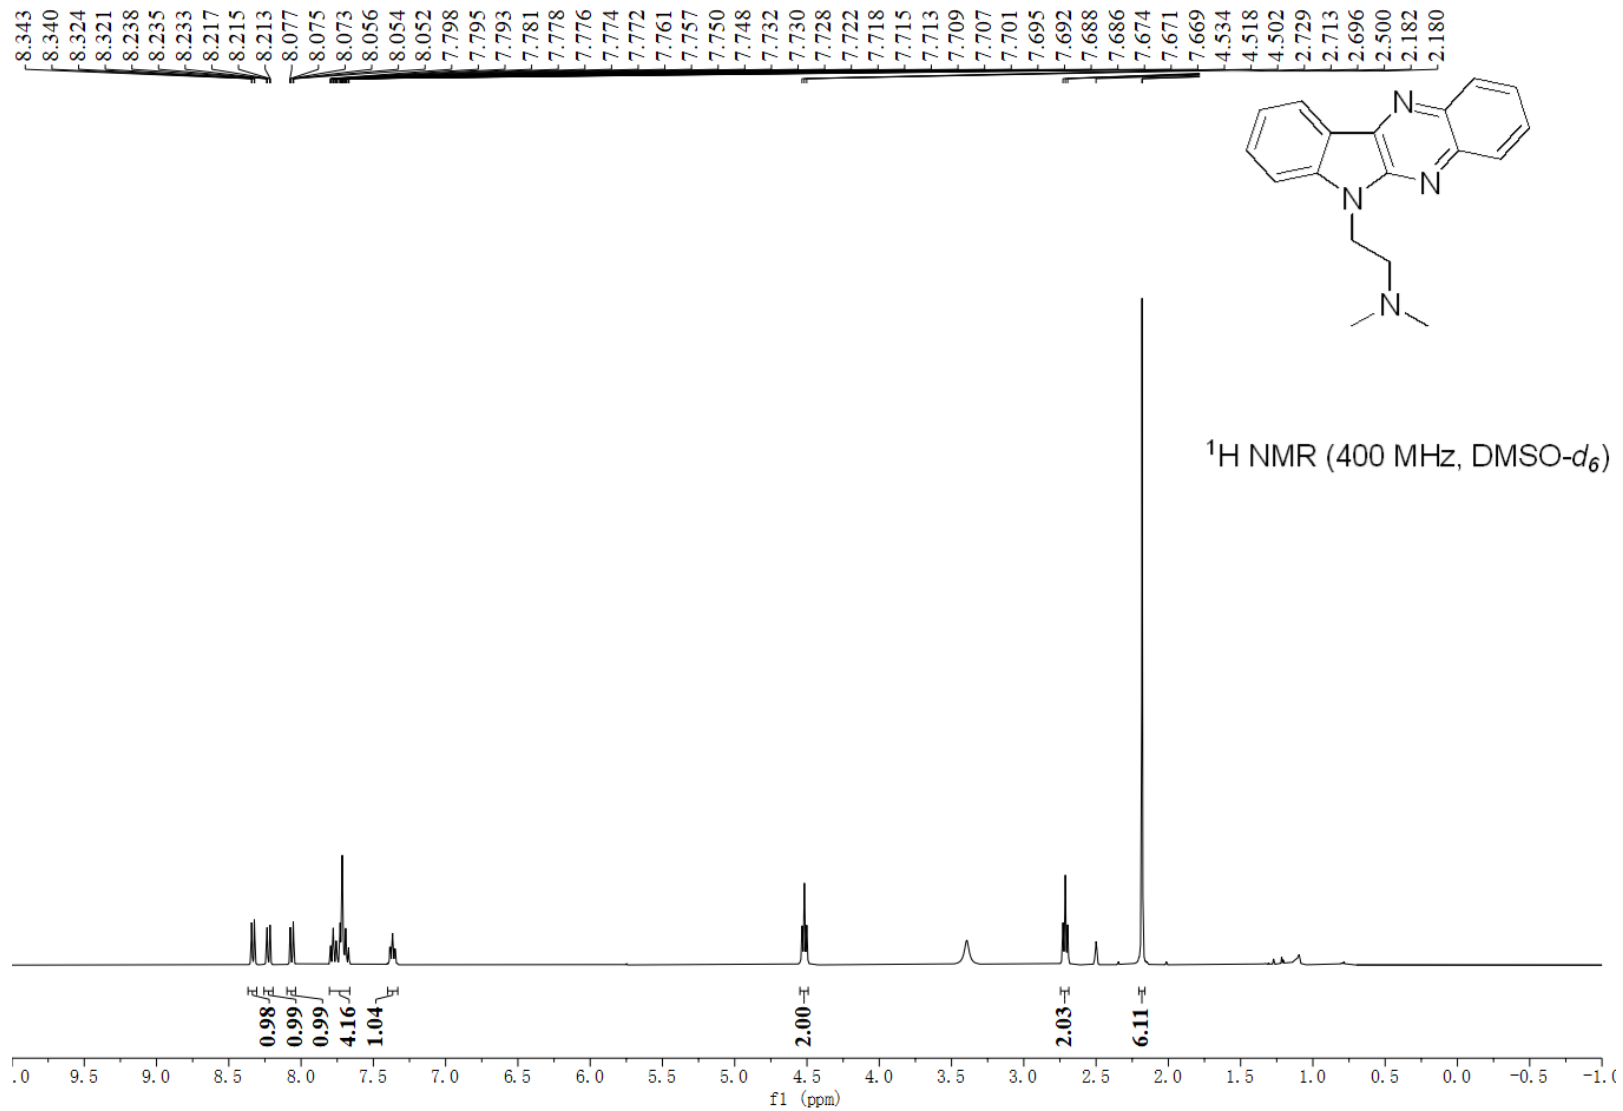

145.443  
144.628  
140.311  
139.844  
139.035  
131.705  
129.459  
129.315  
127.960  
126.394  
122.559  
121.271  
118.999  
110.894

—57.158

5.776

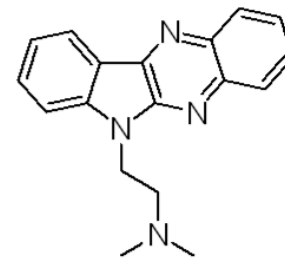

$^{13}\text{C}$  NMR (101 MHz,  $\text{DMSO-}d_6$ )

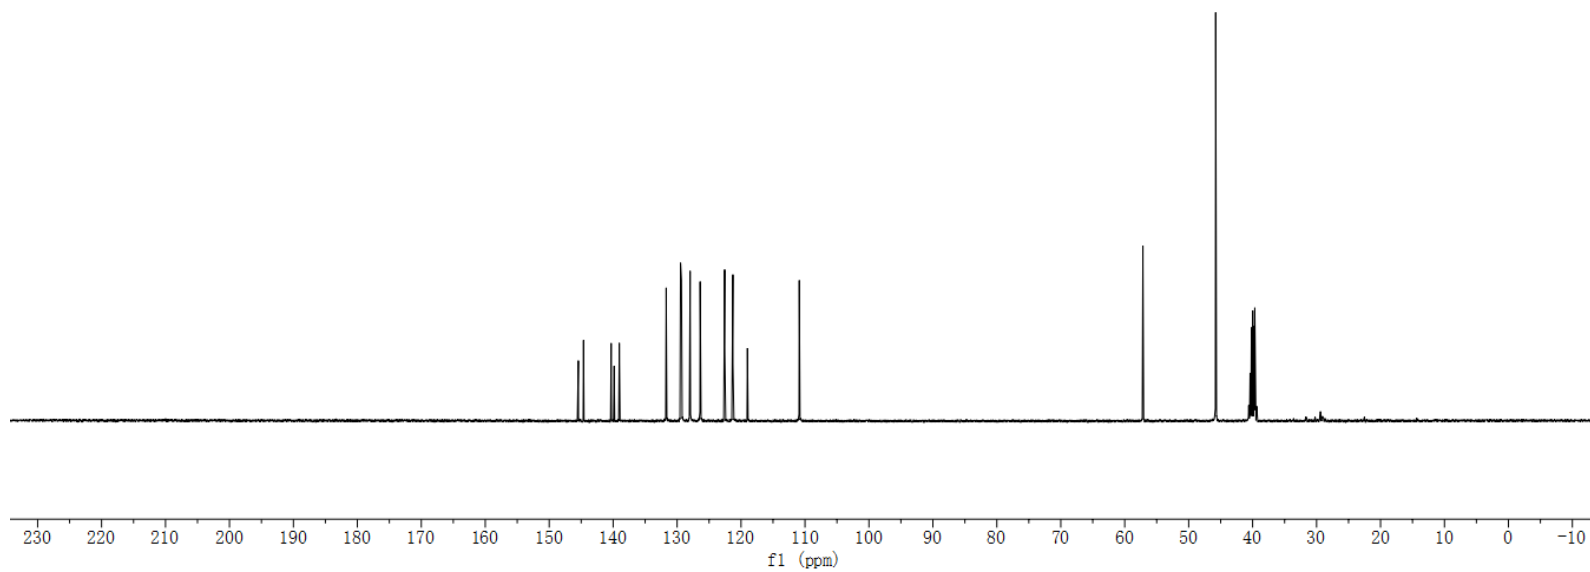

## 9. References

- [1] Jin, Z.; Chu, L.; Chen, Y. Q.; Yu, J. Q. Pd-Catalyzed remote *meta*-C-H functionalization of phenylacetic acids using a pyridine template. *Org. Lett.* **2018**, *20*, 425-428.
- [2] Pumphrey, A. L.; Dong, H.; Driver, T. G. Rh<sup>II</sup>-catalyzed synthesis of  $\alpha$ -,  $\beta$ -, or  $\delta$ -carbolines from aryl azides. *Angew. Chem. Int. Ed.* **2012**, *51*, 5920-5923.
- [3] Reyes, R. L.; Sato, M.; Lwai, T.; Suzuki, K. Asymmetric remote C-H borylation of aliphatic amides and esters with a modular iridium catalyst. *Science* **2020**, *369*, 970-974.
- [4] Dong, H. J.; Latka, R. T.; G., D. T. Ruthenium-catalyzed  $\gamma$ -carbolinium ion formation from aryl azides; synthesis of dimebolin. *Org. Lett.* **2011**, *13*, 2726-2729.
- [5] Bag, S.; Jana, S.; Pradhan, S.; Bhowmick, S.; Goswami, N.; Sinha, S. K.; Maiti, D. Imine as a linchpin approach for *meta*-C-H functionalization. *Nat. Commun.* **2021**, *12*, 1393-1400.
- [6] Edayadulla, N.; Lee, Y. R. Cerium oxide nanoparticle-catalyzed three-component protocol for the synthesis of highly substituted novel quinoxalin-2-amine derivatives and 3,4-dihydroquinoxalin-2-amines in water. *RSC Adv.* **2014**, 11459-11468.
- [7] Zhu, H.; Ying, S.; Zhou, B.; Liang, X.; He, Q.; Song, P.; Hu, X.; Shi, K.; Xiong, M.; Jin, H.; Pan, Y. Discovery of novel 2-aryl-3-sulfonamido-pyridines (HoAns) as microtubule polymerization inhibitors with potent antitumor activities. *Eur. J. Med. Chem.* **2021**, *211*, 113-117.
- [8] Kearney, A. M.; Vanderwal, C. D. Synthesis of nitrogen heterocycles by the ring opening of pyridinium salts. *Angew. Chem., Int. Ed.* **2006**, *45*, 7803-7806.

- [9] Kuninobu, Y.; Ida, H.; Nishi, M.; Kanai, M. A *meta*-selective C-H borylation directed by a secondary interaction between ligand and substrate. *Nat. Chem.* **2015**, *7*, 712-717.
- [10] Li, G.-S.; Yan, Y.-F.; Zhang, P.-F.; Xu, X.-H.; Jin, Z. Palladium-catalyzed *meta*-selective C-H functionalization by noncovalent H-bonding interaction. *ACS Catal.* **2021**, *11*, 10460-10466.
- [11] Chatterjee, T.; Choi, M. G.; Kim, J.; Chang, S. K.; Cho, E. J. Visible-light-induced regioselective synthesis of polyheteroaromatic compounds. *Chem. Commun.* **2016**, *52*, 4203-4206.
- [12] Engqvist, R.; Stensland, B.; Bergman, J. Reduction of indolo[2,3-*b*]quinoxalines. *Tetrahedron* **2005**, *61*, 4495-4500.
- [13] Das, S. K.; Roy, S.; Khatua, H.; Chattopadhyay, B. Ir-Catalyzed Intramolecular transannulation/C(sp<sup>2</sup>)-H amination of 1,2,3,4-tetrazoles by electrocyclozation. *J. Am. Chem. Soc.* **2018**, *140*, 8429-8433.
- [14] He, L. L. Synthesis of  $\alpha$ -Carboline. *Organic Syntheses* **2016**, *93*, 272-285.
- [15] Sathiyalingam, S.; Roesner, S. Synthesis of  $\alpha$ - and  $\beta$ -Carbolines by a metalation/negishi cross-coupling/S<sub>N</sub>Ar reaction sequence. *Adv. Synth. Catal.* **2022**, *364*, 1769-1774.
- [16] Parvatkar, P. T.; Parameswaran, P. S.; Tilve, S. G. An expeditious I<sub>2</sub>-catalyzed entry into 6*H*-indolo[2,3-*b*]quinoline system of cryptotackieine. *J. Org. Chem.* **2009**, *74*, 8369-8372.
- [17] Kaczmarek, L.; Baliciki, R.; Pawel, N. N.; Wanda, P. C.; Mordarski, M. Synthesis and antineoplastic properties of some benzo-iso- $\alpha$ -carboline. *Arch. Pharm.* **1987**, *321*, 463-467.



- [18] Laha, J. K.; Barolo, S. M.; Rossi, R. A.; Cuny, G. D. Synthesis of carbolines by photostimulated cyclization of anilinothalopyridines. *J. Org. Chem.* **2011**, *76*, 6421-6525.
- [19] Wang, P. F.; Chen, C.; Chen, H.; Han, L. S.; Liu, L.; Sun, H. B.; Wen, X. A.; Xu, Q. L. Concise synthesis of spiro[indoline-3,2'-pyrrolidine] and 1-azacarbazole derivatives via copper-catalyzed cyclization of indoles. *Adv. Synth. Catal.* **2017**, *359*, 2339-2344.
- [20] Yang, T. H.; Kavala, V.; Kuo, C. H.; Yao, C. F. Synthesis of Pyrido[2,3-*b*]indoles via Brønsted-Acid-Promoted Decarboxylative Annulation of 3-Bromopropenals and Ethyl 2-Amino-1*H*-indole-3-carboxylates. *Asian J. Org. Chem.* **2020**, *9*, 1053-1058.
- [21] Qu, Z.; Wang, P.; Chen, X.; Deng, G.-J.; Huang, H. Visible-light-driven cadogan reaction. *Chin. Chem. Lett.* **2021**, *32*, 2582-2586.
- [22] Mannes, P. Z.; Onyango, E. O.; Gribble, G. W. Synthesis of a masked 2,3-diaminoindole. *J. Org. Chem.* **2016**, *81*, 12478-12481.
- [23] Parvatkar, P. T.; Tilve, S. G. An efficient synthesis of indoloquinoline alkaloid-neocryptolepine (cryptotackieine). *Tetrahedron Lett.* **2011**, *52*, 6594-6596.
- [24] Tsai, J.-Y.; Lin, Y.-C.; Hsu, M.-H.; Kuo, S.-C.; Huang, L.-J. Synthesis and cytotoxicity of 1,6,8,9-substituted  $\alpha$ -carboline derivatives. *Kaohsiung J. Med. Sci.* **2010**, *26*, 593-602.
- [25] Huang, H. C.; Liu, W. T.; Hua, K. S.; Hung, H. C.; Tsai, J. Y.; Kuo, S. C.; Huang, L. J.; Gean, P. W.  $\alpha$ -Carboline derivative TJY-16 inhibits tumor growth by inducing G2/M cell cycle arrest in glioma cells. *J. Biomed. Sci.* **2016**, *23*, 10.

[26] Wilhelmsson, L. M.; Kingi, N.; Bergman, J. Interactions of antiviral indolo[2,3-*b*]quinoxaline derivatives with DNA. *J. Med. Chem.* **2008**, *51*, 7744-7750.
